# Supplementary material for: Comparative study on mechanisms for improving mechanical properties and microstructure of cement paste modified by different types of nanomaterials
Source: publisher site journal article supplement (doi:10.1515/ntrev-2021-0027), 2021-01-01
Supplement: Supplementary file 1 [file MIP-dV dD Pore Volume.xlsx]

## Sheet: Sheet1
N-0-1d		NC-10-1d		NG-15-1d		NS-20-1d		NT-10-1d			N-0-1d		NC-10-1d		NG-15-1d		NS-20-1d		NT-10-1d
Pore Diameter (nm)	dV/dD Pore Volume (mL/g/nm)										Pore Diameter (nm)
353572	0	355330	0	356541	0	356335	0	348323	0		353572	0	355330	0	356541	0	356335	0	348323	0
90870.1	1.69137e-08	90790	2.48542e-08	90799.5	1.6431e-08	90745.8	2.16617e-08	90822.6	7.43244e-08		90870.1	0.0169137	90790	0.0248542	90799.5	0.016431	90745.8	0.0216617	90822.6	0.0743244
60504.7	2.54634e-08	60471.1	2.81848e-08	60475	3.83288e-08	60445.5	3.28773e-08	60489.6	5.43889e-08		60504.7	0.0254634	60471.1	0.0281848	60475	0.0383288	60445.5	0.0328773	60489.6	0.0543889
45332.7	5.53808e-08	45319.3	3.96557e-08	45315.1	5.96432e-08	45329.7	4.26635e-08	45328.4	7.96523e-08		45332.7	0.0553808	45319.3	0.0396557	45315.1	0.0596432	45329.7	0.0426635	45328.4	0.0796523
32954.1	6.69229e-08	32965.5	4.86378e-08	32963.4	8.46862e-08	32971	5.21812e-08	32972.4	9.39029e-08		32954.1	0.0669229	32965.5	0.0486378	32963.4	0.0846862	32971	0.0521812	32972.4	0.0939029
30225.7	6.50626e-08	30202.3	4.6266e-08	30210.9	1.15937e-07	30213	7.01481e-08	30207.2	1.19886e-07		30225.7	0.0650626	30202.3	0.046266	30210.9	0.115937	30213	0.0701481	30207.2	0.119886
24188.6	6.66495e-08	24188.6	6.5901e-08	24185.3	1.32405e-07	24188.3	7.13621e-08	24185.8	1.29771e-07		24188.6	0.0666495	24188.6	0.065901	24185.3	0.132405	24188.3	0.0713621	24185.8	0.129771
21338.2	6.37074e-08	21342.3	6.94736e-08	21338.2	1.86155e-07	21338.7	7.6102e-08	21331.3	1.42452e-07		21338.2	0.0637074	21342.3	0.0694736	21338.2	0.186155	21338.7	0.076102	21331.3	0.142452
17281.7	8.16868e-08	17277.4	8.49155e-08	17283.5	1.74898e-07	17278.5	9.00062e-08	17277.9	1.7525e-07		17281.7	0.0816868	17277.4	0.0849155	17283.5	0.174898	17278.5	0.0900062	17277.9	0.17525
13962	9.98168e-08	13963	1.00287e-07	13963.6	2.40309e-07	13965.2	1.29759e-07	13958.6	2.06881e-07		13962	0.0998168	13963	0.100287	13963.6	0.240309	13965.2	0.129759	13958.6	0.206881
11316.2	1.16296e-07	11321.9	1.25855e-07	11321.4	2.68401e-07	11322.2	1.464e-07	11318.3	2.6008e-07		11316.2	0.116296	11321.9	0.125855	11321.4	0.268401	11322.2	0.1464	11318.3	0.26008
9062	1.34882e-07	9062.45	1.35444e-07	9062.71	3.35896e-07	9063.13	1.92022e-07	9062.21	3.28995e-07		9062	0.134882	9062.45	0.135444	9062.71	0.335896	9063.13	0.192022	9062.21	0.328995
7243.74	1.69418e-07	7244.65	1.71588e-07	7243.78	3.77028e-07	7244.7	2.27711e-07	7243.96	3.97405e-07		7243.74	0.169418	7244.65	0.171588	7243.78	0.377028	7244.7	0.227711	7243.96	0.397405
6038.34	2.65083e-07	6038.42	2.43764e-07	6036.99	5.28876e-07	6038.45	3.02955e-07	6035.89	5.88016e-07		6038.34	0.265083	6038.42	0.243764	6036.99	0.528876	6038.45	0.302955	6035.89	0.588016
4928.66	3.42242e-07	4950.6	3.20219e-07	4945.55	6.267e-07	4988.44	4.89759e-07	4560.86	3.42791e-07		4928.66	0.342242	4950.6	0.320219	4945.55	0.6267	4988.44	0.489759	4560.86	0.342791
3923.86	3.80615e-07	3911.36	3.0554e-07	3918.02	5.00454e-07	3852.6	4.12582e-07	3850.21	4.18529e-07		3923.86	0.380615	3911.36	0.30554	3918.02	0.500454	3852.6	0.412582	3850.21	0.418529
3206.82	5.25087e-07	3184.76	2.95607e-07	3151.79	4.89256e-07	3217.32	0	2938.37	8.36262e-07		3206.82	0.525087	3184.76	0.295607	3151.79	0.489256	3217.32	0	2938.37	0.836262
2539.23	9.10717e-07	2532.26	4.32567e-07	2479.88	8.46735e-07	2548.33	4.89564e-07	2364.43	1.34621e-06		2539.23	0.910717	2532.26	0.432567	2479.88	0.846735	2548.33	0.489564	2364.43	1.34621
2079.95	1.5471e-06	2089.04	8.60037e-07	1973.44	1.33244e-06	2093.97	1.165e-06	2091.44	2.1952e-06		2079.95	1.5471	2089.04	0.860037	1973.44	1.33244	2093.97	1.165	2091.44	2.1952
1618.42	2.43988e-06	1620.32	1.30425e-06	1540.24	1.33511e-06	1615.8	1.40179e-06	1613.99	1.94151e-06		1618.42	2.43988	1620.32	1.30425	1540.24	1.33511	1615.8	1.40179	1613.99	1.94151
1326.07	3.26474e-06	1317.97	2.46573e-06	1269.3	2.92883e-06	1326.74	1.38857e-06	1269.6	3.22055e-06		1326.07	3.26474	1317.97	2.46573	1269.3	2.92883	1326.74	1.38857	1269.6	3.22055
1058.32	3.90963e-06	1057.6	3.34007e-06	1056.11	2.9081e-06	1057.27	2.02749e-06	1052.89	4.08114e-06		1058.32	3.90963	1057.6	3.34007	1056.11	2.9081	1057.27	2.02749	1052.89	4.08114
834.987	4.34902e-06	837.785	4.17079e-06	828.052	4.05113e-06	836.34	3.48985e-06	832.904	4.41783e-06		834.987	4.34902	837.785	4.17079	828.052	4.05113	836.34	3.48985	832.904	4.41783
678.201	5.5413e-06	679.034	5.27607e-06	678.301	5.6428e-06	677.915	4.55081e-06	676.866	9.09853e-06		678.201	5.5413	679.034	5.27607	678.301	5.6428	677.915	4.55081	676.866	9.09853
554.143	7.20592e-06	553.456	5.88883e-06	552.66	7.75632e-06	553.364	6.86455e-06	555.083	1.13403e-05		554.143	7.20592	553.456	5.88883	552.66	7.75632	553.364	6.86455	555.083	11.3403
433.846	1.16672e-05	434.186	8.1181e-06	433.992	1.34543e-05	434.617	1.09507e-05	432.732	1.55667e-05		433.846	11.6672	434.186	8.1181	433.992	13.4543	434.617	10.9507	432.732	15.5667
350.058	2.22748e-05	349.743	1.31513e-05	350.113	2.28221e-05	350.521	1.58347e-05	349.351	3.22352e-05		350.058	22.2748	349.743	13.1513	350.113	22.8221	350.521	15.8347	349.351	32.2352
283.986	4.39848e-05	283.946	2.22019e-05	283.995	4.17706e-05	283.851	2.20451e-05	283.56	3.92101e-05		283.986	43.9848	283.946	22.2019	283.995	41.7706	283.851	22.0451	283.56	39.2101
226.814	9.04497e-05	227.034	4.96616e-05	226.993	9.333e-05	226.988	3.17544e-05	226.894	6.37222e-05		226.814	90.4497	227.034	49.6616	226.993	93.33	226.988	31.7544	226.894	63.7222
183.331	0.000174671	183.268	0.000147755	183.154	0.000206385	183.069	4.40869e-05	183.28	0.000100914		183.331	174.671	183.268	147.755	183.154	206.385	183.069	44.0869	183.28	100.914
150.972	0.000237673	151.122	0.00028158	151.121	0.000302702	151.121	6.41724e-05	151.1	0.000169943		150.972	237.673	151.122	281.58	151.121	302.702	151.121	64.1724	151.1	169.943
120.75	0.000294803	120.889	0.000334432	120.848	0.000342488	120.876	7.30437e-05	120.863	0.000286239		120.75	294.803	120.889	334.432	120.848	342.488	120.876	73.0437	120.863	286.239
95.3242	0.000374295	95.3838	0.000356853	95.3528	0.000414798	95.4235	8.92208e-05	95.3375	0.000427003		95.3242	374.295	95.3838	356.853	95.3528	414.798	95.4235	89.2208	95.3375	427.003
77.0464	0.000526949	77.1271	0.000436614	77.1041	0.000566605	77.1185	0.000132215	77.0537	0.000558105		77.0464	526.949	77.1271	436.614	77.1041	566.605	77.1185	132.215	77.0537	558.105
62.4286	0.000714393	62.497	0.000597945	62.4601	0.000745032	62.485	0.000201161	62.3939	0.000734225		62.4286	714.393	62.497	597.945	62.4601	745.032	62.485	201.161	62.3939	734.225
50.3242	0.000908002	50.3446	0.000839112	50.2842	0.000912889	50.3417	0.000345587	50.2838	0.000917348		50.3242	908.002	50.3446	839.112	50.2842	912.889	50.3417	345.587	50.2838	917.348
40.3267	0.00110062	40.3111	0.00112852	40.3268	0.00110194	40.3303	0.000721214	40.3275	0.00104209		40.3267	1100.62	40.3111	1128.52	40.3268	1101.94	40.3303	721.214	40.3275	1042.09
32.406	0.0012559	32.41	0.00135697	32.412	0.00124978	32.3991	0.00137229	32.4005	0.00123238		32.406	1255.9	32.41	1356.97	32.412	1249.78	32.3991	1372.29	32.4005	1232.38
26.3085	0.00150186	26.3013	0.00163129	26.3038	0.00150761	26.2981	0.00194952	26.2917	0.00155559		26.3085	1501.86	26.3013	1631.29	26.3038	1507.61	26.2981	1949.52	26.2917	1555.59
21.0963	0.00173964	21.0961	0.00190346	21.0933	0.0017836	21.0947	0.0027903	21.0991	0.00152191		21.0963	1739.64	21.0961	1903.46	21.0933	1783.6	21.0947	2790.3	21.0991	1521.91
17.1075	0.00203249	17.1131	0.00218504	17.1154	0.00204054	17.1092	0.00346803	17.1145	0.0018923		17.1075	2032.49	17.1131	2185.04	17.1154	2040.54	17.1092	3468.03	17.1145	1892.3
13.7336	0.00237744	13.7358	0.00256466	13.7349	0.00243813	13.7348	0.00417765	13.7357	0.00242638		13.7336	2377.44	13.7358	2564.66	13.7349	2438.13	13.7348	4177.65	13.7357	2426.38
12.247	0.0025306	12.2492	0.0027462	12.2482	0.00250738	12.2476	0.0045586	12.2478	0.00234016		12.247	2530.6	12.2492	2746.2	12.2482	2507.38	12.2476	4558.6	12.2478	2340.16
11.0499	0.00282545	11.0519	0.00288849	11.0514	0.00288924	11.0529	0.00508716	11.0503	0.0028275		11.0499	2825.45	11.0519	2888.49	11.0514	2889.24	11.0529	5087.16	11.0503	2827.5
9.05896	0.00315629	9.06039	0.00340769	9.05939	0.00316101	9.06236	0.00592218	9.05972	0.00333908		9.05896	3156.29	9.06039	3407.69	9.05939	3161.01	9.06236	5922.18	9.05972	3339.08
7.23766	0.00362201	7.23737	0.00382199	7.23764	0.00367066	7.23761	0.00716131	7.23762	0.00337682		7.23766	3622.01	7.23737	3821.99	7.23764	3670.66	7.23761	7161.31	7.23762	3376.82
6.0304	0.0041115	6.03029	0.00386867	6.03044	0.00412065	6.03028	0.00815125	6.03036	0.00535933		6.0304	4111.5	6.03029	3868.67	6.03044	4120.65	6.03028	8151.25	6.03036	5359.33
5.169	0.00396154	5.16911	0.00425563	5.16847	0.00456696	5.16859	0.00887309	5.16837	0.00488899		5.169	3961.54	5.16911	4255.63	5.16847	4566.96	5.16859	8873.09	5.16837	4888.99
4.52291	0.00472055	4.52309	0.00466295	4.52301	0.00389693	4.52323	0.00936381	4.52288	0.00673938		4.52291	4720.55	4.52309	4662.95	4.52301	3896.93	4.52323	9363.81	4.52288	6739.38
4.0204	0.0044145	4.02005	0.00431394	4.02015	0.0045563	4.01983	0.00803209	4.02009	0.00505649		4.0204	4414.5	4.02005	4313.94	4.02015	4556.3	4.01983	8032.09	4.02009	5056.49
3.61871	0.00511523	3.61841	0.00454338	3.61874	0.00555098	3.61841	0.00801794	3.61868	0.00624388		3.61871	5115.23	3.61841	4543.38	3.61874	5550.98	3.61841	8017.94	3.61868	6243.88
3.29051	0.00503259	3.28967	0.00429279	3.29041	0.00162961	3.28976	0.0101998	3.29021	0.00800689		3.29051	5032.59	3.28967	4292.79	3.29041	1629.61	3.28976	10199.8	3.29021	8006.89
3.01648	0.0070583	3.01637	0.00653773	3.01656	0.00803952	3.01637	0.00578276	3.01652	0.00732702		3.01648	7058.3	3.01637	6537.73	3.01656	8039.52	3.01637	5782.76	3.01652	7327.02
3.92305	-0.00283346	3.92347	-0.00283181	3.92364	-0.00283189	3.92339	-0.00283204	3.92321	-0.00283308		3.92305	-2833.46	3.92347	-2831.81	3.92364	-2831.89	3.92339	-2832.04	3.92321	-2833.08
5.09392	-0.00116416	5.09284	-0.000996607	5.09408	-0.00206051	5.09368	-0.00144387	5.09268	-0.00219648		5.09392	-1164.16	5.09284	-996.607	5.09408	-2060.51	5.09368	-1443.87	5.09268	-2196.48
6.62277	0	6.62086	-0.000152836	6.62184	-0.00020484	6.62297	9.02409e-05	6.62318	-0.000442598		6.62277	0	6.62086	-152.836	6.62184	-204.84	6.62297	90.2409	6.62318	-442.598
8.60187	0.000204452	8.60267	0.000281418	8.60578	6.4967e-05	8.60348	0.000424955	8.60418	9.57421e-05		8.60187	204.452	8.60267	281.418	8.60578	64.967	8.60348	424.955	8.60418	95.7421
11.2891	0.000393188	11.2879	0.000359515	11.2892	0.000339276	11.2885	0.000763543	11.2924	0.000345879		11.2891	393.188	11.2879	359.515	11.2892	339.276	11.2885	763.543	11.2924	345.879
14.5533	0.000415725	14.5627	0.000471495	14.5614	0.000397244	14.5603	0.000958102	14.5588	0.000502036		14.5533	415.725	14.5627	471.495	14.5614	397.244	14.5603	958.102	14.5588	502.036
18.793	0.000491908	18.7906	0.000525312	18.798	0.000506533	18.7907	0.00105059	18.8008	0.00052394		18.793	491.908	18.7906	525.312	18.798	506.533	18.7907	1050.59	18.8008	523.94
24.7097	0.000522414	24.7058	0.000556569	24.7119	0.000522014	24.6949	0.00103479	24.7103	0.000527471		24.7097	522.414	24.7058	556.569	24.7119	522.014	24.6949	1034.79	24.7103	527.471
31.6571	0.000510414	31.6444	0.000544832	31.6471	0.000553872	31.6534	0.000921978	31.6633	0.000525346		31.6571	510.414	31.6444	544.832	31.6471	553.872	31.6534	921.978	31.6633	525.346
41.979	0.000476889	41.9529	0.000519218	41.9641	0.000501724	41.9485	0.000774252	41.9352	0.000470527		41.979	476.889	41.9529	519.218	41.9641	501.724	41.9485	774.252	41.9352	470.527
54.76	0.000415136	54.7891	0.000445336	54.7656	0.000445931	54.6388	0.000530262	54.6209	0.000424664		54.76	415.136	54.7891	445.336	54.7656	445.931	54.6388	530.262	54.6209	424.664
69.6822	0.000347663	69.6016	0.000388182	69.2465	0.000382605	69.5019	0.000386416	69.4728	0.000323243		69.6822	347.663	69.6016	388.182	69.2465	382.605	69.5019	386.416	69.4728	323.243
90.6837	0.000298368	90.2642	0.000315965	90.4001	0.000305798	90.3537	0.000275722	90.5365	0.000284907		90.6837	298.368	90.2642	315.965	90.4001	305.798	90.3537	275.722	90.5365	284.907
120.686	0.000225685	120.459	0.000245802	120.595	0.000256686	120.257	0.000184212	120.466	0.000226553		120.686	225.685	120.459	245.802	120.595	256.686	120.257	184.212	120.466	226.553
150.561	0.000182378	150.48	0.000189758	150.607	0.00020723	150.493	0.000121145	150.561	0.000184693		150.561	182.378	150.48	189.758	150.607	207.23	150.493	121.145	150.561	184.693
200.623	0.000142595	200.776	0.000143456	200.395	0.000165216	200.365	7.76029e-05	200.168	0.00014308		200.623	142.595	200.776	143.456	200.395	165.216	200.365	77.6029	200.168	143.08
257.598	0.000111792	257.075	0.000112961	257.562	0.000128402	256.999	5.11663e-05	258.388	0.000117063		257.598	111.792	257.075	112.961	257.562	128.402	256.999	51.1663	258.388	117.063
359.019	8.33252e-05	359.862	7.69471e-05	360.268	9.99748e-05	359.744	2.55749e-05	361.004	8.22568e-05		359.019	83.3252	359.862	76.9471	360.268	99.9748	359.744	25.5749	361.004	82.2568
449.599	6.41672e-05	446.818	5.86878e-05	448.361	7.49164e-05	454.071	1.59774e-05	448.057	6.35027e-05		449.599	64.1672	446.818	58.6878	448.361	74.9164	454.071	15.9774	448.057	63.5027
599.842	4.99521e-05	605.042	3.58994e-05	600.823	5.8209e-05	594.918	1.26273e-05	600.493	4.41105e-05		599.842	49.9521	605.042	35.8994	600.823	58.209	594.918	12.6273	600.493	44.1105
754.966	3.13268e-05	741.838	2.37285e-05	744.816	4.28866e-05	746.287	1.03078e-05	740.74	3.01093e-05		754.966	31.3268	741.838	23.7285	744.816	42.8866	746.287	10.3078	740.74	30.1093
934.913	2.03891e-05	985.64	7.4526e-06	940.445	2.67871e-05	948.729	7.45501e-06	947.972	1.70753e-05		934.913	20.3891	985.64	7.4526	940.445	26.7871	948.729	7.45501	947.972	17.0753
1212.66	9.32212e-06	1223.57	3.79991e-06	1238.25	9.55833e-06	1256.65	4.51168e-06	1224.14	8.05628e-06		1212.66	9.32212	1223.57	3.79991	1238.25	9.55833	1256.65	4.51168	1224.14	8.05628
1626.23	3.63696e-06	1573.45	2.149e-06	1612.82	4.52655e-06	1648.4	3.74167e-06	1612.78	5.1179e-06		1626.23	3.63696	1573.45	2.149	1612.82	4.52655	1648.4	3.74167	1612.78	5.1179
2018.46	2.13795e-06	2012.64	1.46903e-06	2021.8	2.35787e-06	2029.45	1.99888e-06	2137.11	2.93873e-06		2018.46	2.13795	2012.64	1.46903	2021.8	2.35787	2029.45	1.99888	2137.11	2.93873
2662.22	1.72298e-06	2903.67	1.08173e-06	2800.54	1.48578e-06	2665.17	1.19942e-06	2666.13	2.14381e-06		2662.22	1.72298	2903.67	1.08173	2800.54	1.48578	2665.17	1.19942	2666.13	2.14381
3642.82	1.18162e-06	3658.34	7.91533e-07	3353.1	1.4724e-06	3444.42	9.05225e-07	3430.26	1.37199e-06		3642.82	1.18162	3658.34	0.791533	3353.1	1.4724	3444.42	0.905225	3430.26	1.37199
5752.81	7.7344e-07	5622.9	4.50698e-07	6312.16	6.5482e-07	5733.22	5.98e-07	5863.99	9.68648e-07		5752.81	0.77344	5622.9	0.450698	6312.16	0.65482	5733.22	0.598	5863.99	0.968648
9875.38	3.6526e-07	13692.2	2.26259e-07	10074.3	4.35706e-07	9499.86	3.37526e-07	9860.19	4.79814e-07		9875.38	0.36526	13692.2	0.226259	10074.3	0.435706	9499.86	0.337526	9860.19	0.479814
