# Supplementary material for: Comparative study on mechanisms for improving mechanical properties and microstructure of cement paste modified by different types of nanomaterials
Source: publisher site journal article supplement (doi:10.1515/ntrev-2021-0027), 2021-01-01
Supplement: Supplementary file 2 [file MIP-dV dlogD Pore Volume.xlsx]

## Sheet: Sheet1
N-0-1d		NC-10-1d		NG-15-1d		NS-20-1d		NT-10-1d
Pore Diameter (nm)	dV/dlogD Pore Volume (mL/g)	Pore Diameter (nm)	dV/dlogD Pore Volume (mL/g)	Pore Diameter (nm)	dV/dlogD Pore Volume (mL/g)	Pore Diameter (nm)	dV/dlogD Pore Volume (mL/g)	Pore Diameter (nm)	dV/dlogD Pore Volume (mL/g)
353572	0	355330	0	356541	0	356335	0	348323	0
90870.1	0.00753024	90790	0.0110952	90799.5	0.00735051	90745.8	0.00968487	90822.6	0.0327834
60504.7	0.0043775	60471.1	0.00484181	60475	0.00658499	60445.5	0.00564535	60489.6	0.00934649
45332.7	0.00670166	45319.3	0.00479669	45315.1	0.00721426	45329.7	0.00515992	45328.4	0.00963707
32954.1	0.00598122	32965.5	0.00434703	32963.4	0.00756828	32971	0.00466465	32972.4	0.00839435
30225.7	0.00472961	30202.3	0.00336253	30210.9	0.00842701	30213	0.00509956	30207.2	0.0087147
24188.6	0.00415819	24188.6	0.00410984	24185.3	0.00825798	24188.3	0.00445121	24185.8	0.00809324
21338.2	0.00333484	21342.3	0.00363701	21338.2	0.00974384	21338.7	0.00398367	21331.3	0.00745519
17281.7	0.00361863	17277.4	0.00376158	17283.5	0.00774817	17278.5	0.00398686	17277.9	0.00776125
13962	0.00357691	13963	0.00359341	13963.6	0.00861237	13965.2	0.00464999	13958.6	0.00741186
11316.2	0.00337209	11321.9	0.00365031	11321.4	0.00778472	11322.2	0.0042466	11318.3	0.00754101
9062	0.00315155	9062.45	0.0031656	9062.71	0.00785045	9063.13	0.00448815	9062.21	0.00768789
7243.74	0.00316721	7244.65	0.00320805	7243.78	0.00704869	7244.7	0.00425752	7243.96	0.00742953
6038.34	0.00404238	6038.42	0.00371754	6036.99	0.00806424	6038.45	0.00462026	6035.89	0.00896532
4928.66	0.00430644	4950.6	0.00403801	4945.55	0.0078979	4988.44	0.00619874	4560.86	0.00415488
3923.86	0.00386245	3911.36	0.00310299	3918.02	0.00508395	3852.6	0.00417631	3850.21	0.00404321
3206.82	0.00429614	3184.76	0.00240656	3151.79	0.00396662	3217.32	0	2938.37	0.00649643
2539.23	0.00599754	2532.26	0.00283473	2479.88	0.00546382	2548.33	0.00323506	2364.43	0.00818653
2079.95	0.00820032	2089.04	0.00456173	1973.44	0.00680195	2093.97	0.00620659	2091.44	0.0112473
1618.42	0.0103346	1620.32	0.00554009	1540.24	0.00537343	1615.8	0.00595376	1613.99	0.00823652
1326.07	0.0110309	1317.97	0.00831161	1269.3	0.00944418	1326.74	0.00468892	1269.6	0.0106407
1058.32	0.0106872	1057.6	0.00909833	1056.11	0.0077638	1057.27	0.00554107	1052.89	0.0108807
834.987	0.00943565	837.785	0.00906033	828.052	0.0087447	836.34	0.00757358	832.904	0.00954788
678.201	0.00961898	679.034	0.00917987	678.301	0.00975371	677.915	0.00790463	676.866	0.0157585
554.143	0.010189	553.456	0.00832699	552.66	0.010954	553.364	0.00969765	555.083	0.0160317
433.846	0.0132052	434.186	0.00918576	433.992	0.0152091	434.617	0.0123957	432.732	0.0176126
350.058	0.0200263	349.743	0.0118234	350.113	0.0205235	350.521	0.0142585	349.351	0.0289145
283.986	0.031991	283.946	0.0161392	283.995	0.0303835	283.851	0.0160411	283.56	0.0284679
226.814	0.0529688	227.034	0.0290941	226.993	0.0546772	226.988	0.0185982	226.894	0.0372941
183.331	0.0821689	183.268	0.0695304	183.154	0.0970824	183.069	0.0207334	183.28	0.0474745
150.972	0.0911893	151.122	0.108068	151.121	0.116137	151.121	0.024615	151.1	0.0652204
120.75	0.0918421	120.889	0.104299	120.848	0.106794	120.876	0.0227789	120.863	0.0892534
95.3242	0.0926799	95.3838	0.0884403	95.3528	0.102767	95.4235	0.0221152	95.3375	0.10579
77.0464	0.104179	77.1271	0.0863915	77.1041	0.112077	77.1185	0.0261652	77.0537	0.110352
62.4286	0.114293	62.497	0.0957657	62.4601	0.119271	62.485	0.0322128	62.3939	0.117441
50.3242	0.117415	50.3446	0.108589	50.2842	0.118032	50.3417	0.0447167	50.2838	0.118543
40.3267	0.114399	40.3111	0.117302	40.3268	0.11449	40.3303	0.0749805	40.3275	0.108272
32.406	0.104748	32.41	0.113162	32.412	0.104247	32.3991	0.114449	32.4005	0.102779
26.3085	0.101156	26.3013	0.109866	26.3038	0.101544	26.2981	0.131268	26.2917	0.104733
21.0963	0.09456	21.0961	0.10345	21.0933	0.0969341	21.0947	0.151633	21.0991	0.0827032
17.1075	0.089071	17.1131	0.0957707	17.1154	0.0894366	17.1092	0.151982	17.1145	0.0829493
13.7336	0.0840783	13.7358	0.0907215	13.7349	0.0862488	13.7348	0.147756	13.7357	0.0858336
12.247	0.0756107	12.2492	0.0820666	12.2482	0.0749242	12.2476	0.136213	12.2478	0.0699286
11.0499	0.075716	11.0519	0.0774195	11.0514	0.0774347	11.0529	0.136347	11.0503	0.075775
9.05896	0.0728323	9.06039	0.0786469	9.05939	0.0729482	9.06236	0.1367	9.05972	0.077055
7.23766	0.0676728	7.23737	0.0714137	7.23764	0.0685835	7.23761	0.133826	7.23762	0.0630943
6.0304	0.0626312	6.03029	0.0589303	6.03044	0.0627707	6.03028	0.124168	6.03036	0.0816391
5.169	0.0509784	5.16911	0.0547628	5.16847	0.0587664	5.16859	0.114176	5.16837	0.0629091
4.52291	0.0525949	4.52309	0.0519546	4.52301	0.0434165	4.52323	0.104328	4.52288	0.075083
4.0204	0.0433702	4.02005	0.0423813	4.02015	0.0447625	4.01983	0.0789086	4.02009	0.0496754
3.61871	0.0449462	3.61841	0.039918	3.61874	0.0487737	3.61841	0.0704436	3.61868	0.0548609
3.29051	0.0400018	3.28967	0.0341157	3.29041	0.0129529	3.28976	0.0810612	3.29021	0.06364
3.01648	0.0512194	3.01637	0.0474348	3.01656	0.0583396	3.01637	0.0419577	3.01652	0.0531673
3.92305	-0.0225083	3.92347	-0.0224961	3.92364	-0.0224979	3.92339	-0.0224977	3.92321	-0.022506
5.09392	-0.0120171	5.09284	-0.0102869	5.09408	-0.0212716	5.09368	-0.0149047	5.09268	-0.0226708
6.62277	0	6.62086	-0.00204938	6.62184	-0.00274725	6.62297	0.00121034	6.62318	-0.00593581
8.60187	0.00356336	8.60267	0.00490435	8.60578	0.00113249	8.60348	0.0074073	8.60418	0.00166896
11.2891	0.00894906	11.2879	0.00818259	11.2892	0.00772372	11.2885	0.0173795	11.2924	0.00787452
14.5533	0.0123026	14.5627	0.0139571	14.5614	0.0117592	14.5603	0.0283597	14.5588	0.0148619
18.793	0.0187828	18.7906	0.0200632	18.798	0.0193491	18.7907	0.0401221	18.8008	0.0200139
24.7097	0.0260026	24.7058	0.0276987	24.7119	0.0259872	24.6949	0.0514865	24.7103	0.0262599
31.6571	0.0329548	31.6444	0.0351669	31.6471	0.0357563	31.6534	0.0595066	31.6633	0.0339227
41.979	0.0401629	41.9529	0.0437052	41.9641	0.0422402	41.9485	0.0651779	41.9352	0.0396091
54.76	0.0459654	54.7891	0.0493084	54.7656	0.0493694	54.6388	0.0586244	54.6209	0.0469346
69.6822	0.0495698	69.6016	0.0553279	69.2465	0.054377	69.5019	0.0549625	69.4728	0.0459598
90.6837	0.0547708	90.2642	0.0578287	90.4001	0.0558752	90.3537	0.0504549	90.5365	0.0521803
120.686	0.0545492	120.459	0.0592222	120.595	0.0619252	120.257	0.044365	120.466	0.0546643
150.561	0.056723	150.48	0.0589483	150.607	0.0644389	150.493	0.0376048	150.561	0.0573923
200.623	0.0572608	200.776	0.0576148	200.395	0.0663145	200.365	0.0311346	200.168	0.0573871
257.598	0.0586701	257.075	0.0592427	257.562	0.0673457	256.999	0.0268039	258.388	0.0614678
359.019	0.0586157	359.862	0.0541441	360.268	0.0704525	359.744	0.0179903	361.004	0.0581168
449.599	0.0594861	446.818	0.054293	448.361	0.0694681	454.071	0.0149026	448.057	0.0589216
599.842	0.0599382	605.042	0.0431442	600.823	0.069814	594.918	0.0151578	600.493	0.0528723
754.966	0.0486487	741.838	0.0366677	744.816	0.0661867	746.287	0.0158487	740.74	0.0463233
934.913	0.0395176	985.64	0.014723	940.445	0.0517388	948.729	0.0144787	947.972	0.0330305
1212.66	0.0229197	1223.57	0.00962738	1238.25	0.0238252	1256.65	0.0113805	1224.14	0.0200376
1626.23	0.0118024	1573.45	0.00688394	1612.82	0.0147721	1648.4	0.012438	1612.78	0.0166106
2018.46	0.00893631	2012.64	0.00603466	2021.8	0.00982476	2029.45	0.00843344	2137.11	0.012604
2662.22	0.009226	2903.67	0.00605506	2800.54	0.00817676	2665.17	0.00644291	2666.13	0.011807
3642.82	0.00850773	3658.34	0.00595342	3353.1	0.0104033	3444.42	0.0063326	3430.26	0.00957899
5752.81	0.00822381	5622.9	0.0047431	6312.16	0.00705289	5733.22	0.00618532	5863.99	0.0101235
9875.38	0.00641662	13692.2	0.00472365	10074.3	0.00807336	9499.86	0.00579677	9860.19	0.00849579
