# Supplementary material for: Comparative study on mechanisms for improving mechanical properties and microstructure of cement paste modified by different types of nanomaterials
Source: publisher site journal article supplement (doi:10.1515/ntrev-2021-0027), 2021-01-01
Supplement: Supplementary file 3 [file MIP-28d.xlsx]

## Sheet: Sheet1
N-0-28d		NC-0.3-28d		NG-0.03-28d		NS-6-28d		NT-2-28d
Pore Diameter (nm)	dV/dlogD Pore Volume (mL/g)
90792	0.0460584	90853.1	0.0091851	90835.8	0.00377591	90818.4	0.00741257	90880.5	0.00484506
60441.8	-0.00121975	60454.2	0.0048078	60536	0.00191451	60467.2	0.00346741	60515.6	0.00245635
45306.1	-0.00172187	45329.5	0.00489228	45369.4	0.00199376	45328.1	0.00319791	45367	0.00263395
32952.8	-0.00155894	32965.7	0.00382743	32971.2	0.00205881	32963.3	0.00263016	32969	0.00264154
30219.3	-0.00573142	30212.3	0.00403765	30226.5	0.00409564	30212.8	0.00320519	30218.6	0
24179.6	0.0199238	24189.8	0.0038992	24197.3	0.00209237	24181.3	0.00288436	24191.8	0.00265351
21342.3	0.0178538	21343.4	0.00310172	21344	0.00204099	21339.9	0.00299013	21342.7	0.00255598
17280.4	0.0156885	17284.7	0.0034677	17283.1	0.00311397	17267.4	0.00316505	17281.4	0.00306274
13964.2	0.0129096	13960.8	0.00317095	13928.1	0.00266442	13960.7	0.00236469	13964.4	0.00316523
11320.3	0.0109658	11318.9	0.00309921	11324.9	0.00224979	11319.2	0.00266282	11324.9	0.00281737
9063.47	0.00918911	9063.51	0.00276413	9063.49	0.00266889	9062.12	0.00248277	9063.82	0.00249839
7244.08	0.00703668	7244.41	0.00253897	7246.58	0.00184213	7243.62	0.00201357	7245.82	0.00278456
6038.53	0.0072476	6038.69	0.00282729	6036.62	0.00254808	6038.19	0.0029151	6037	0.00292594
4938.63	0.0088642	4984.83	0.00278026	4989.38	0.00145103	4948.83	0.00158258	4956.47	0.00358959
3896.87	0.0040788	3911.32	0.00213683	3869.17	0.00183996	3839.01	0.00141185	3859.6	0.000980179
3175.56	0.00396984	3220.4	0.00135328	3205.07	0	3224.12	0	3221.27	0.00203551
2525.18	0.00415307	2506.45	0.0021476	2539.36	0.0017034	2523.4	0.00154618	2528.88	0
2069.88	0.00302782	2098.18	0.00210167	2095.52	0.00152432	2092.78	0.00262808	2103.77	0.00174885
1616.13	0.00332574	1620.09	0.00271758	1609.92	0.00124262	1619.87	0.00215874	1623.26	0.00231045
1326.41	0.00144411	1322.19	0.00165095	1325.87	0	1323.32	0.00227295	1323.04	0.00166088
1053.75	0.00227855	1055.96	0.00227681	1051.57	0.00104736	1055.67	0.00129126	1055.13	0.00151708
837.517	0.0031395	833.933	0.00140441	835.858	0.00161571	836.033	0.00210972	831.734	0.00211999
680.234	0.00172088	678.78	0.00250534	677.168	0	677.711	0.00151605	679.903	0.00129391
552.733	0.00279768	554.483	0.00139884	552.898	0	553.48	0.00166526	553.011	0.00197866
434.277	0.00185844	433.715	0.00195034	433.565	0.001291	434.84	0.00196997	434.1	0.00168611
348.807	0.00246888	349.615	0.0017136	350.306	0.00144832	350.021	0.0015276	349.62	0.00182119
283.927	0.00165647	284.038	0.00157409	283.835	0	284.121	0.00158313	284.005	0.00193963
226.83	0.00286185	227.043	0.00238499	226.695	0.00130417	226.449	0.00229771	226.912	0.00153861
183.338	0.00180906	183.193	0.00169114	183.147	0.0011332	183.24	0.00146082	183.155	0.00198914
151.018	0.00293679	151.102	0.00290667	151.075	0.00372475	151.022	0.00152694	150.989	0.00227552
120.704	0.00224873	120.886	0.00108292	120.892	0	120.889	0.00208679	120.935	0.00269353
95.3126	0.00370081	95.4281	0.00339773	95.402	0.00267623	95.3441	0.00126856	95.3881	0.00262313
77.0808	0.00418052	77.1455	0.00371246	77.1259	0.00231069	77.1095	0.00195495	77.0875	0.00351709
62.3938	0.00414791	62.5086	0.00414837	62.4737	0.00322149	62.4215	0.00201222	62.4752	0.00437536
50.2876	0.00810952	50.3496	0.00573652	50.3402	0.00535986	50.3021	0.00254767	50.2958	0.00674656
40.3207	0.0125573	40.3198	0.00693947	40.3199	0.00516782	40.3271	0.0032668	40.3228	0.009233
32.3976	0.0322911	32.3996	0.0122492	32.398	0.0175034	32.3938	0.00447933	32.4074	0.0187851
26.2875	0.0899011	26.293	0.040037	26.3011	0.0587092	26.3047	0.00617375	26.3001	0.0607698
21.1076	0.139501	21.096	0.0979433	21.1003	0.104798	21.0989	0.0154415	21.0978	0.121911
17.1177	0.124163	17.1207	0.126181	17.1159	0.119031	17.1103	0.0439837	17.11	0.137025
13.7403	0.0597912	13.7321	0.0854862	13.7324	0.100986	13.7353	0.0995533	13.743	0.0835801
12.2471	0.0424713	12.2455	0.0441337	12.2492	0.0563785	12.2469	0.152651	12.2502	0.0533644
11.0529	0.0443311	11.0507	0.0453905	11.0521	0.0433609	11.0523	0.164676	11.05	0.0480523
9.05886	0.044921	9.05886	0.0466258	9.05824	0.0386776	9.06003	0.111753	9.0599	0.0564947
7.2376	0.0593319	7.23758	0.0520323	7.23785	0.0439334	7.23789	0.0743301	7.23768	0.0665183
6.03045	0.073065	6.03039	0.070008	6.03096	0.0553049	6.03058	0.0709379	6.0303	0.092391
5.1692	0.083028	5.169	0.0729112	5.16869	0.0710067	5.16914	0.0746924	5.16838	0.0890903
4.52297	0.0905745	4.52265	0.0870229	4.52308	0.0883492	4.52247	0.0808361	4.52327	0.101863
4.0201	0.0894923	4.0199	0.0876224	4.02061	0.0862234	4.02038	0.11205	4.01983	0.0990375
3.61872	0.0691006	3.6188	0.0766644	3.61844	0.0998007	3.61864	0.103954	3.61862	0.102754
3.29032	0.0661413	3.29029	0.0904035	3.2899	0.0955385	3.29062	0.123464	3.28981	0.114208
3.01647	0.0666843	3.01638	0.0985224	3.01635	0.112122	3.01644	0.134342	3.01638	0.105401
