# Supplementary material for: Comparative study on mechanisms for improving mechanical properties and microstructure of cement paste modified by different types of nanomaterials
Source: publisher site journal article supplement (doi:10.1515/ntrev-2021-0027), 2021-01-01
Supplement: Supplementary file 4 [file N-0-1d.xlsx]

## Sheet: Sheet1
Time (min)	Temperature (°C)	Weight (mg)		Temperature Difference (°C/mg)
0.00246667	20.3392	13.0553	100	-0.061255	-0.799702
0.00433333	20.3846	13.0553	100	-0.061221	-0.799258
0.0126667	20.4336	13.0553	99.9999	-0.0612226	-0.799279
0.021	20.4852	13.0552	99.9992	-0.0612218	-0.799269
0.0293333	20.526	13.0551	99.9985	-0.0612164	-0.799198
0.0376667	20.5727	13.055	99.9976	-0.0612112	-0.799131
0.046	20.6202	13.0549	99.9966	-0.0612095	-0.799108
0.0543333	20.669	13.0547	99.9953	-0.0612031	-0.799025
0.0626667	20.7166	13.0545	99.9937	-0.0611921	-0.798881
0.071	20.7558	13.0543	99.9923	-0.0611824	-0.798754
0.0793333	20.8014	13.0541	99.991	-0.0611753	-0.798662
0.0876667	20.8473	13.0539	99.9894	-0.0611665	-0.798547
0.096	20.8899	13.0537	99.9875	-0.061158	-0.798436
0.104333	20.9352	13.0534	99.9857	-0.0611503	-0.798335
0.112667	20.9859	13.0532	99.9838	-0.0611497	-0.798328
0.121	21.0243	13.053	99.9822	-0.0611475	-0.798299
0.129333	21.0677	13.0528	99.9804	-0.0611442	-0.798256
0.137667	21.1147	13.0526	99.9788	-0.0611455	-0.798272
0.146	21.1544	13.0524	99.9774	-0.0611526	-0.798365
0.154333	21.1994	13.0521	99.9756	-0.0611588	-0.798447
0.162667	21.2429	13.0519	99.974	-0.0611638	-0.798512
0.171	21.2824	13.0516	99.9718	-0.0611709	-0.798605
0.179333	21.3281	13.0514	99.9703	-0.0611789	-0.798709
0.187667	21.3775	13.0512	99.9687	-0.0611938	-0.798903
0.196	21.416	13.051	99.9669	-0.0612095	-0.799108
0.204333	21.4571	13.0508	99.9651	-0.061227	-0.799336
0.212667	21.4964	13.0505	99.9631	-0.0612455	-0.799578
0.221	21.5417	13.0503	99.9612	-0.0612677	-0.799869
0.229333	21.5788	13.05	99.9591	-0.0612937	-0.800207
0.237667	21.6161	13.0497	99.9568	-0.0613238	-0.8006
0.246	21.655	13.0494	99.9544	-0.0613579	-0.801046
0.254333	21.6958	13.0491	99.9521	-0.061393	-0.801505
0.262667	21.7367	13.0488	99.9497	-0.0614301	-0.801989
0.271	21.7727	13.0484	99.9473	-0.0614693	-0.8025
0.279333	21.8152	13.0481	99.9449	-0.0615055	-0.802972
0.287667	21.8549	13.0478	99.9424	-0.0615468	-0.803512
0.296	21.8885	13.0474	99.9396	-0.0615884	-0.804056
0.304333	21.9328	13.0471	99.9367	-0.0616353	-0.804667
0.312667	21.9695	13.0467	99.934	-0.0616828	-0.805287
0.321	22.0097	13.0463	99.9311	-0.0617322	-0.805932
0.329333	22.0517	13.046	99.9285	-0.0617801	-0.806558
0.337667	22.0883	13.0457	99.9259	-0.0618309	-0.807222
0.346	22.1271	13.0453	99.9231	-0.0618865	-0.807947
0.354333	22.1616	13.0449	99.9204	-0.0619383	-0.808623
0.362667	22.2051	13.0445	99.9174	-0.0619949	-0.809362
0.371	22.2377	13.0441	99.9141	-0.0620525	-0.810113
0.379333	22.274	13.0438	99.9115	-0.062113	-0.810904
0.387667	22.3103	13.0434	99.9085	-0.0621738	-0.811698
0.396	22.3491	13.043	99.9055	-0.062233	-0.812471
0.404333	22.3756	13.0426	99.9028	-0.0622943	-0.813271
0.412667	22.4218	13.0422	99.8997	-0.062357	-0.814089
0.421	22.4504	13.0418	99.8966	-0.0624198	-0.814909
0.429333	22.4913	13.0414	99.8936	-0.0624834	-0.81574
0.437667	22.5284	13.0411	99.8907	-0.0625497	-0.816605
0.446	22.5679	13.0407	99.888	-0.0626177	-0.817493
0.454333	22.6089	13.0403	99.8852	-0.0626866	-0.818392
0.462667	22.6445	13.04	99.8824	-0.0627567	-0.819308
0.471	22.681	13.0396	99.8794	-0.0628223	-0.820163
0.479333	22.7158	13.0392	99.8764	-0.0628946	-0.821108
0.487667	22.7425	13.0388	99.8733	-0.0629689	-0.822078
0.496	22.7831	13.0384	99.8702	-0.0630426	-0.823041
0.504333	22.8186	13.038	99.8672	-0.0631162	-0.824002
0.512667	22.8614	13.0375	99.8637	-0.0631905	-0.82497
0.521	22.8993	13.0371	99.8604	-0.0632666	-0.825964
0.529333	22.9355	13.0366	99.857	-0.0633424	-0.826955
0.537667	22.9722	13.0362	99.8539	-0.0634198	-0.827965
0.546	23.0107	13.0358	99.8506	-0.0634961	-0.82896
0.554333	23.0473	13.0354	99.8471	-0.0635742	-0.829981
0.562667	23.0802	13.0349	99.8437	-0.0636497	-0.830966
0.571	23.1121	13.0344	99.8401	-0.0637229	-0.831922
0.579333	23.1528	13.034	99.8367	-0.0638004	-0.832933
0.587667	23.1847	13.0335	99.833	-0.063882	-0.833998
0.596	23.2239	13.0331	99.8296	-0.0639619	-0.835042
0.604333	23.256	13.0326	99.8258	-0.0640423	-0.836091
0.612667	23.2977	13.0321	99.8221	-0.0641238	-0.837156
0.621	23.3332	13.0316	99.8185	-0.0642027	-0.838185
0.629333	23.3754	13.0312	99.815	-0.0642841	-0.839248
0.637667	23.4069	13.0307	99.8114	-0.06437	-0.840369
0.646	23.4412	13.0302	99.8079	-0.0644568	-0.841503
0.654333	23.4753	13.0298	99.8044	-0.0645416	-0.84261
0.662667	23.518	13.0294	99.8011	-0.0646257	-0.843708
0.671	23.5497	13.0289	99.7979	-0.0647092	-0.844798
0.679333	23.5915	13.0285	99.7946	-0.0647928	-0.845889
0.687667	23.6291	13.0281	99.7914	-0.064881	-0.847042
0.696	23.6763	13.0277	99.7882	-0.06497	-0.848202
0.704333	23.7091	13.0272	99.7848	-0.0650617	-0.849401
0.712667	23.7472	13.0267	99.7811	-0.0651509	-0.850564
0.721	23.7879	13.0263	99.7776	-0.0652395	-0.851721
0.729333	23.8292	13.0258	99.774	-0.0653312	-0.852918
0.737667	23.8669	13.0253	99.7704	-0.0654245	-0.854136
0.746	23.901	13.0248	99.7665	-0.0655136	-0.8553
0.754333	23.9412	13.0243	99.7623	-0.0656015	-0.856447
0.762667	23.9844	13.0237	99.7581	-0.0656945	-0.857661
0.771	24.0325	13.0232	99.754	-0.0657833	-0.858821
0.779333	24.0627	13.0227	99.75	-0.0658737	-0.86
0.787667	24.1019	13.0221	99.7459	-0.0659653	-0.861197
0.796	24.146	13.0216	99.742	-0.06606	-0.862433
0.804333	24.1891	13.0211	99.738	-0.0661532	-0.86365
0.812667	24.2319	13.0206	99.7343	-0.0662434	-0.864828
0.821	24.2693	13.0201	99.7303	-0.0663387	-0.866071
0.829333	24.3116	13.0196	99.7264	-0.0664378	-0.867365
0.837667	24.3551	13.0191	99.7226	-0.0665375	-0.868667
0.846	24.3996	13.0186	99.7187	-0.0666351	-0.869941
0.854333	24.4448	13.0181	99.7148	-0.0667353	-0.871249
0.862667	24.4924	13.0176	99.711	-0.0668344	-0.872543
0.871	24.5286	13.0171	99.7072	-0.0669312	-0.873807
0.879333	24.5782	13.0166	99.7031	-0.0670272	-0.875061
0.887667	24.622	13.016	99.6991	-0.0671268	-0.87636
0.896	24.6641	13.0155	99.6948	-0.0672287	-0.877691
0.904333	24.7112	13.0149	99.6904	-0.0673273	-0.878978
0.912667	24.7524	13.0143	99.6861	-0.0674287	-0.880302
0.921	24.8012	13.0138	99.682	-0.0675298	-0.881622
0.929333	24.8473	13.0133	99.6781	-0.067633	-0.882969
0.937667	24.8978	13.0128	99.674	-0.0677372	-0.884329
0.946	24.9426	13.0122	99.67	-0.0678426	-0.885706
0.954333	24.9846	13.0117	99.6657	-0.0679496	-0.887103
0.962667	25.0417	13.0111	99.6616	-0.0680599	-0.888543
0.971	25.084	13.0106	99.6578	-0.0681712	-0.889995
0.979333	25.1246	13.0101	99.654	-0.0682769	-0.891376
0.987667	25.1777	13.0097	99.6503	-0.0683817	-0.892744
0.996	25.2231	13.0092	99.6465	-0.0684878	-0.894129
1.00433	25.2718	13.0087	99.6428	-0.068599	-0.895581
1.01267	25.3195	13.0082	99.6389	-0.0687082	-0.897006
1.021	25.3673	13.0077	99.6351	-0.0688155	-0.898407
1.02933	25.4283	13.0071	99.6308	-0.0689247	-0.899833
1.03767	25.477	13.0066	99.6267	-0.0690347	-0.901268
1.046	25.5272	13.0061	99.6227	-0.0691442	-0.902698
1.05433	25.575	13.0055	99.6185	-0.0692516	-0.9041
1.06267	25.634	13.0049	99.6142	-0.0693644	-0.905573
1.071	25.6836	13.0044	99.6099	-0.0694784	-0.907061
1.07933	25.7386	13.0038	99.6058	-0.0695915	-0.908538
1.08767	25.7897	13.0033	99.6012	-0.069703	-0.909994
1.096	25.8485	13.0027	99.5967	-0.0698149	-0.911455
1.10433	25.898	13.0021	99.5923	-0.0699264	-0.91291
1.11267	25.9523	13.0015	99.588	-0.0700382	-0.91437
1.121	26.0081	13.001	99.5836	-0.0701498	-0.915827
1.12933	26.0652	13.0004	99.5792	-0.0702622	-0.917294
1.13767	26.1132	12.9998	99.5747	-0.0703784	-0.918811
1.146	26.1782	12.9992	99.5702	-0.0704928	-0.920305
1.15433	26.2295	12.9986	99.5656	-0.0706067	-0.921791
1.16267	26.2852	12.9979	99.5606	-0.0707225	-0.923303
1.171	26.341	12.9973	99.5557	-0.0708383	-0.924815
1.17933	26.3971	12.9967	99.5508	-0.0709558	-0.926349
1.18767	26.4531	12.996	99.5458	-0.0710745	-0.927899
1.196	26.5177	12.9954	99.541	-0.0711943	-0.929463
1.20433	26.5709	12.9947	99.5359	-0.071314	-0.931026
1.21267	26.6316	12.9941	99.531	-0.071435	-0.932606
1.221	26.6874	12.9935	99.5264	-0.0715524	-0.934138
1.22933	26.75	12.9929	99.5219	-0.0716741	-0.935726
1.23767	26.8075	12.9923	99.5175	-0.0717962	-0.937321
1.246	26.8679	12.9918	99.5131	-0.0719169	-0.938896
1.25433	26.9199	12.9912	99.5089	-0.0720372	-0.940468
1.26267	26.9896	12.9906	99.5045	-0.0721589	-0.942056
1.271	27.0501	12.9901	99.5001	-0.0722809	-0.943648
1.27933	27.1033	12.9894	99.4951	-0.072401	-0.945217
1.28767	27.1682	12.9888	99.4905	-0.0725219	-0.946795
1.296	27.2316	12.9882	99.4858	-0.0726439	-0.948388
1.30433	27.2952	12.9876	99.4811	-0.0727669	-0.949994
1.31267	27.3572	12.9869	99.4761	-0.0728891	-0.95159
1.321	27.4203	12.9863	99.4713	-0.0730146	-0.953227
1.32933	27.4853	12.9857	99.4667	-0.0731395	-0.954858
1.33767	27.5495	12.985	99.4617	-0.073263	-0.956471
1.346	27.6086	12.9844	99.4568	-0.0733875	-0.958096
1.35433	27.6795	12.9838	99.4521	-0.0735128	-0.959732
1.36267	27.7448	12.9832	99.4475	-0.073639	-0.961379
1.371	27.8057	12.9826	99.443	-0.0737673	-0.963054
1.37933	27.8782	12.982	99.4384	-0.0738922	-0.964685
1.38767	27.9414	12.9814	99.4338	-0.0740189	-0.966339
1.396	28.0062	12.9808	99.429	-0.0741456	-0.967993
1.40433	28.079	12.9801	99.4238	-0.074273	-0.969656
1.41267	28.1416	12.9794	99.4186	-0.0744017	-0.971337
1.421	28.2042	12.9788	99.4136	-0.0745318	-0.973035
1.42933	28.2791	12.9781	99.4085	-0.0746615	-0.974728
1.43767	28.3442	12.9774	99.4035	-0.0747905	-0.976412
1.446	28.4141	12.9768	99.3986	-0.0749187	-0.978086
1.45433	28.4809	12.9761	99.3934	-0.0750461	-0.979749
1.46267	28.5532	12.9755	99.3882	-0.0751762	-0.981448
1.471	28.6217	12.9747	99.3826	-0.075305	-0.983129
1.47933	28.6953	12.9741	99.3775	-0.0754341	-0.984815
1.48767	28.7602	12.9734	99.3724	-0.0755639	-0.986509
1.496	28.8334	12.9727	99.3673	-0.0756926	-0.988189
1.50433	28.9015	12.972	99.3619	-0.0758209	-0.989864
1.51267	28.9728	12.9713	99.3566	-0.0759518	-0.991574
1.521	29.0513	12.9707	99.3515	-0.0760829	-0.993285
1.52933	29.1211	12.97	99.3462	-0.0762163	-0.995026
1.53767	29.1965	12.9693	99.3408	-0.076354	-0.996824
1.546	29.2652	12.9686	99.3357	-0.0764871	-0.998562
1.55433	29.3394	12.968	99.331	-0.0766218	-1.00032
1.56267	29.4161	12.9673	99.3259	-0.0767556	-1.00207
1.571	29.4815	12.9667	99.3209	-0.0768894	-1.00381
1.57933	29.5636	12.966	99.3158	-0.0770237	-1.00557
1.58767	29.6289	12.9654	99.3111	-0.0771583	-1.00733
1.596	29.7051	12.9647	99.306	-0.0772912	-1.00906
1.60433	29.7821	12.964	99.3007	-0.0774262	-1.01082
1.61267	29.8562	12.9634	99.2955	-0.0775599	-1.01257
1.621	29.9371	12.9627	99.2903	-0.0776935	-1.01431
1.62933	30.0071	12.962	99.2849	-0.0778288	-1.01608
1.63767	30.0823	12.9612	99.2795	-0.0779648	-1.01785
1.646	30.161	12.9605	99.2736	-0.0781011	-1.01963
1.65433	30.2333	12.9597	99.2677	-0.0782367	-1.0214
1.66267	30.3069	12.959	99.2619	-0.0783748	-1.02321
1.671	30.3868	12.9582	99.2558	-0.0785149	-1.02504
1.67933	30.4601	12.9574	99.25	-0.0786544	-1.02686
1.68767	30.5398	12.9566	99.2441	-0.0787931	-1.02867
1.696	30.6164	12.9559	99.2382	-0.0789325	-1.03049
1.70433	30.6969	12.9551	99.2323	-0.0790726	-1.03232
1.71267	30.7736	12.9543	99.2263	-0.079214	-1.03416
1.721	30.8538	12.9535	99.2202	-0.0793544	-1.03599
1.72933	30.9352	12.9528	99.2144	-0.0794956	-1.03784
1.73767	31.0147	12.952	99.209	-0.0796356	-1.03967
1.746	31.0928	12.9513	99.2032	-0.0797746	-1.04148
1.75433	31.1694	12.9506	99.1976	-0.0799146	-1.04331
1.76267	31.2449	12.9498	99.1921	-0.080058	-1.04518
1.771	31.3356	12.9491	99.1867	-0.0802001	-1.04704
1.77933	31.4124	12.9484	99.181	-0.0803437	-1.04891
1.78767	31.4845	12.9476	99.175	-0.0804833	-1.05073
1.796	31.5651	12.9468	99.1692	-0.0806269	-1.05261
1.80433	31.6419	12.9461	99.1636	-0.0807714	-1.05449
1.81267	31.7243	12.9453	99.1577	-0.0809162	-1.05638
1.821	31.8089	12.9446	99.1516	-0.0810632	-1.0583
1.82933	31.8945	12.9438	99.1458	-0.0812095	-1.06021
1.83767	31.9684	12.943	99.1395	-0.0813561	-1.06213
1.846	32.0508	12.9422	99.1332	-0.0815008	-1.06402
1.85433	32.1383	12.9413	99.1269	-0.0816475	-1.06593
1.86267	32.2204	12.9405	99.1207	-0.081795	-1.06786
1.871	32.3014	12.9397	99.1147	-0.0819444	-1.06981
1.87933	32.3844	12.9389	99.1086	-0.0820902	-1.07171
1.88767	32.4653	12.9381	99.1023	-0.0822374	-1.07363
1.896	32.5501	12.9373	99.0961	-0.082388	-1.0756
1.90433	32.6315	12.9365	99.0898	-0.0825374	-1.07755
1.91267	32.715	12.9357	99.0836	-0.0826863	-1.0795
1.921	32.7985	12.9349	99.0775	-0.0828384	-1.08148
1.92933	32.8831	12.9341	99.0713	-0.0829903	-1.08346
1.93767	32.964	12.9332	99.0649	-0.0831393	-1.08541
1.946	33.0508	12.9324	99.0584	-0.0832885	-1.08736
1.95433	33.129	12.9315	99.052	-0.0834396	-1.08933
1.96267	33.2159	12.9307	99.0455	-0.0835914	-1.09131
1.971	33.3037	12.9298	99.0389	-0.0837428	-1.09329
1.97933	33.3896	12.929	99.0322	-0.0838907	-1.09522
1.98767	33.4686	12.9281	99.0254	-0.0840413	-1.09719
1.996	33.5541	12.9272	99.0186	-0.0841958	-1.0992
2.00433	33.6379	12.9263	99.0119	-0.0843464	-1.10117
2.01267	33.7237	12.9254	99.0052	-0.0844939	-1.10309
2.021	33.8033	12.9246	98.9984	-0.0846466	-1.10509
2.02933	33.894	12.9237	98.9918	-0.0848006	-1.1071
2.03767	33.9757	12.9228	98.9852	-0.0849516	-1.10907
2.046	34.0597	12.922	98.9787	-0.085106	-1.11108
2.05433	34.1436	12.9212	98.9723	-0.0852623	-1.11312
2.06267	34.232	12.9203	98.9658	-0.0854212	-1.1152
2.071	34.3146	12.9194	98.9592	-0.0855753	-1.11721
2.07933	34.3986	12.9186	98.9526	-0.085727	-1.11919
2.08767	34.4847	12.9177	98.9459	-0.0858815	-1.12121
2.096	34.5772	12.9169	98.9394	-0.0860423	-1.12331
2.10433	34.6596	12.916	98.9327	-0.0862012	-1.12538
2.11267	34.75	12.9151	98.9258	-0.0863586	-1.12744
2.121	34.8304	12.9142	98.9188	-0.0865165	-1.1295
2.12933	34.9167	12.9132	98.9118	-0.0866699	-1.1315
2.13767	35.0055	12.9123	98.9049	-0.0868222	-1.13349
2.146	35.0946	12.9115	98.8981	-0.0869727	-1.13546
2.15433	35.1815	12.9105	98.891	-0.0871321	-1.13754
2.16267	35.2666	12.9096	98.8841	-0.0872915	-1.13962
2.171	35.3482	12.9087	98.8772	-0.0874495	-1.14168
2.17933	35.4395	12.9078	98.8701	-0.0876063	-1.14373
2.18767	35.5256	12.9069	98.8631	-0.087764	-1.14579
2.196	35.6115	12.906	98.8564	-0.0879208	-1.14783
2.20433	35.6972	12.9051	98.8497	-0.0880809	-1.14992
2.21267	35.7848	12.9042	98.8428	-0.0882419	-1.15202
2.221	35.8735	12.9033	98.8354	-0.0884014	-1.15411
2.22933	35.9584	12.9023	98.8281	-0.0885646	-1.15624
2.23767	36.0445	12.9014	98.821	-0.0887217	-1.15829
2.246	36.1318	12.9004	98.8137	-0.0888801	-1.16036
2.25433	36.2246	12.8995	98.8063	-0.0890382	-1.16242
2.26267	36.3051	12.8985	98.7989	-0.0891975	-1.1645
2.271	36.3943	12.8975	98.7915	-0.0893575	-1.16659
2.27933	36.4841	12.8965	98.7838	-0.0895169	-1.16867
2.28767	36.5711	12.8955	98.7761	-0.0896747	-1.17073
2.296	36.6559	12.8946	98.7686	-0.0898368	-1.17285
2.30433	36.7492	12.8936	98.7613	-0.0899955	-1.17492
2.31267	36.8343	12.8927	98.7543	-0.0901499	-1.17693
2.321	36.9247	12.8917	98.747	-0.0903069	-1.17898
2.32933	37.0139	12.8908	98.7398	-0.0904644	-1.18104
2.33767	37.1001	12.8899	98.7327	-0.0906224	-1.1831
2.346	37.1845	12.8889	98.7257	-0.0907801	-1.18516
2.35433	37.2736	12.888	98.7184	-0.0909361	-1.1872
2.36267	37.3598	12.8871	98.7113	-0.0910913	-1.18922
2.371	37.4533	12.8861	98.704	-0.0912498	-1.19129
2.37933	37.5409	12.8852	98.6966	-0.0914034	-1.1933
2.38767	37.6264	12.8842	98.6895	-0.0915597	-1.19534
2.396	37.7134	12.8832	98.6819	-0.0917182	-1.19741
2.40433	37.7986	12.8823	98.6744	-0.091878	-1.19949
2.41267	37.8894	12.8813	98.6668	-0.0920363	-1.20156
2.421	37.9819	12.8802	98.6589	-0.0921928	-1.20361
2.42933	38.0697	12.8792	98.6513	-0.0923446	-1.20559
2.43767	38.1565	12.8783	98.6438	-0.0924944	-1.20754
2.446	38.2464	12.8773	98.6362	-0.0926492	-1.20956
2.45433	38.3294	12.8763	98.6287	-0.0928005	-1.21154
2.46267	38.4193	12.8753	98.6209	-0.0929542	-1.21355
2.471	38.5076	12.8743	98.6131	-0.0931072	-1.21554
2.47933	38.5972	12.8733	98.6054	-0.0932601	-1.21754
2.48767	38.6855	12.8722	98.5977	-0.09341	-1.2195
2.496	38.7682	12.8713	98.5902	-0.0935581	-1.22143
2.50433	38.8514	12.8703	98.5826	-0.0937045	-1.22334
2.51267	38.9452	12.8693	98.5751	-0.0938514	-1.22526
2.521	39.0261	12.8683	98.5675	-0.0940005	-1.22721
2.52933	39.1184	12.8673	98.5601	-0.0941448	-1.22909
2.53767	39.2102	12.8664	98.5526	-0.0942877	-1.23095
2.546	39.2902	12.8654	98.5451	-0.0944297	-1.23281
2.55433	39.3819	12.8644	98.5375	-0.094572	-1.23467
2.56267	39.4687	12.8634	98.5302	-0.0947114	-1.23649
2.571	39.5606	12.8625	98.523	-0.0948505	-1.2383
2.57933	39.6446	12.8615	98.5157	-0.09499	-1.24012
2.58767	39.7325	12.8606	98.5083	-0.0951312	-1.24197
2.596	39.8233	12.8596	98.5008	-0.0952731	-1.24382
2.60433	39.9055	12.8586	98.4933	-0.0954134	-1.24565
2.61267	39.9957	12.8576	98.4856	-0.0955535	-1.24748
2.621	40.0844	12.8566	98.478	-0.0956917	-1.24928
2.62933	40.1744	12.8556	98.4704	-0.0958265	-1.25104
2.63767	40.2701	12.8546	98.4628	-0.0959616	-1.25281
2.646	40.3492	12.8536	98.4552	-0.0960983	-1.25459
2.65433	40.4372	12.8527	98.4477	-0.0962339	-1.25636
2.66267	40.5248	12.8517	98.44	-0.0963678	-1.25811
2.671	40.6144	12.8507	98.4327	-0.0964973	-1.2598
2.67933	40.6981	12.8497	98.4253	-0.0966248	-1.26147
2.68767	40.7874	12.8488	98.4178	-0.0967499	-1.2631
2.696	40.8712	12.8478	98.4103	-0.0968738	-1.26472
2.70433	40.9629	12.8468	98.4028	-0.0969958	-1.26631
2.71267	41.0545	12.8459	98.3956	-0.0971187	-1.26791
2.721	41.1394	12.8449	98.3885	-0.0972387	-1.26948
2.72933	41.2229	12.844	98.3813	-0.0973533	-1.27098
2.73767	41.3117	12.8431	98.3742	-0.0974675	-1.27247
2.746	41.3948	12.8421	98.3671	-0.0975794	-1.27393
2.75433	41.4859	12.8412	98.3597	-0.0976889	-1.27536
2.76267	41.5735	12.8402	98.3524	-0.0977979	-1.27678
2.771	41.6594	12.8393	98.3454	-0.0979054	-1.27818
2.77933	41.7446	12.8384	98.3385	-0.098012	-1.27958
2.78767	41.8392	12.8375	98.3316	-0.0981162	-1.28094
2.796	41.9198	12.8366	98.3247	-0.0982185	-1.28227
2.80433	42.0106	12.8357	98.3175	-0.098318	-1.28357
2.81267	42.0958	12.8347	98.3102	-0.0984164	-1.28486
2.821	42.1799	12.8337	98.3028	-0.0985128	-1.28611
2.82933	42.2647	12.8328	98.2953	-0.0986076	-1.28735
2.83767	42.355	12.8318	98.2882	-0.0987021	-1.28859
2.846	42.4433	12.8309	98.2812	-0.098793	-1.28977
2.85433	42.5325	12.83	98.2741	-0.0988852	-1.29098
2.86267	42.6183	12.8291	98.2669	-0.0989744	-1.29214
2.871	42.7033	12.8281	98.2598	-0.0990628	-1.2933
2.87933	42.7875	12.8272	98.2527	-0.0991475	-1.2944
2.88767	42.8747	12.8263	98.2457	-0.0992304	-1.29548
2.896	42.9624	12.8254	98.2388	-0.0993119	-1.29655
2.90433	43.0492	12.8246	98.2324	-0.0993906	-1.29757
2.91267	43.132	12.8237	98.226	-0.0994672	-1.29857
2.921	43.2178	12.8228	98.2193	-0.0995454	-1.2996
2.92933	43.3066	12.8219	98.2125	-0.0996191	-1.30056
2.93767	43.3969	12.8211	98.2058	-0.0996871	-1.30144
2.946	43.481	12.8202	98.1991	-0.0997536	-1.30231
2.95433	43.5663	12.8194	98.1925	-0.0998183	-1.30316
2.96267	43.649	12.8185	98.186	-0.0998846	-1.30402
2.971	43.7371	12.8176	98.1793	-0.0999481	-1.30485
2.97933	43.8235	12.8168	98.1729	-0.100011	-1.30567
2.98767	43.9058	12.8159	98.1662	-0.100068	-1.30641
2.996	43.9956	12.815	98.1594	-0.100124	-1.30715
3.00433	44.0796	12.8142	98.1529	-0.100176	-1.30782
3.01267	44.1633	12.8133	98.1465	-0.100228	-1.3085
3.021	44.2527	12.8125	98.1399	-0.10028	-1.30918
3.02933	44.3377	12.8117	98.1336	-0.100328	-1.30982
3.03767	44.4254	12.8108	98.1272	-0.100376	-1.31043
3.046	44.5119	12.81	98.1208	-0.100419	-1.311
3.05433	44.5944	12.8092	98.1145	-0.100462	-1.31156
3.06267	44.674	12.8083	98.1082	-0.100501	-1.31207
3.071	44.7602	12.8075	98.1016	-0.100538	-1.31255
3.07933	44.8499	12.8067	98.0954	-0.100573	-1.31301
3.08767	44.931	12.8058	98.0891	-0.100607	-1.31346
3.096	45.0158	12.805	98.0829	-0.100642	-1.31391
3.10433	45.1003	12.8042	98.0769	-0.100672	-1.3143
3.11267	45.1911	12.8034	98.0707	-0.100705	-1.31473
3.121	45.2699	12.8026	98.0644	-0.100735	-1.31512
3.12933	45.3596	12.8018	98.0581	-0.10076	-1.31546
3.13767	45.4445	12.801	98.0519	-0.100787	-1.31581
3.146	45.5228	12.8002	98.0455	-0.100812	-1.31612
3.15433	45.6189	12.7994	98.0394	-0.100837	-1.31645
3.16267	45.6953	12.7985	98.0331	-0.100862	-1.31678
3.171	45.7787	12.7977	98.0268	-0.100886	-1.31709
3.17933	45.8669	12.7969	98.0203	-0.100902	-1.31731
3.18767	45.9546	12.796	98.0138	-0.100917	-1.31751
3.196	46.0354	12.7952	98.0077	-0.10093	-1.31767
3.20433	46.1224	12.7944	98.0017	-0.100943	-1.31784
3.21267	46.2071	12.7937	97.9958	-0.100957	-1.31802
3.221	46.2904	12.7929	97.9898	-0.100966	-1.31814
3.22933	46.3766	12.7921	97.984	-0.100976	-1.31827
3.23767	46.4577	12.7914	97.9781	-0.100985	-1.31838
3.246	46.5468	12.7906	97.9723	-0.100988	-1.31843
3.25433	46.627	12.7898	97.9665	-0.100993	-1.3185
3.26267	46.7137	12.7891	97.9607	-0.100997	-1.31855
3.271	46.7953	12.7883	97.9549	-0.101003	-1.31862
3.27933	46.8813	12.7876	97.9491	-0.101005	-1.31865
3.28767	46.9661	12.7868	97.9431	-0.101006	-1.31866
3.296	47.0491	12.786	97.9371	-0.101005	-1.31865
3.30433	47.1322	12.7852	97.9312	-0.101005	-1.31865
3.31267	47.213	12.7845	97.9254	-0.101003	-1.31863
3.321	47.2941	12.7837	97.9195	-0.100999	-1.31858
3.32933	47.3796	12.783	97.914	-0.100996	-1.31853
3.33767	47.4673	12.7822	97.9083	-0.100987	-1.31841
3.346	47.5484	12.7815	97.9027	-0.100981	-1.31834
3.35433	47.6296	12.7808	97.8973	-0.100973	-1.31823
3.36267	47.7134	12.7801	97.8917	-0.100961	-1.31807
3.371	47.7931	12.7793	97.8861	-0.100948	-1.3179
3.37933	47.8796	12.7786	97.8804	-0.100937	-1.31777
3.38767	47.9681	12.7779	97.8747	-0.100923	-1.31758
3.396	48.0457	12.7771	97.8689	-0.10091	-1.31741
3.40433	48.1296	12.7764	97.8632	-0.100896	-1.31723
3.41267	48.2156	12.7756	97.8573	-0.100882	-1.31704
3.421	48.2887	12.7749	97.8518	-0.100866	-1.31684
3.42933	48.3783	12.7742	97.8464	-0.100849	-1.31662
3.43767	48.4651	12.7734	97.8409	-0.100832	-1.31639
3.446	48.5476	12.7727	97.8354	-0.100816	-1.31619
3.45433	48.6325	12.772	97.8299	-0.100797	-1.31594
3.46267	48.7071	12.7713	97.8244	-0.100775	-1.31565
3.471	48.7947	12.7706	97.8192	-0.100754	-1.31537
3.47933	48.8789	12.7699	97.8138	-0.100728	-1.31503
3.48767	48.9648	12.7692	97.8084	-0.100702	-1.3147
3.496	49.0424	12.7685	97.8032	-0.100676	-1.31435
3.50433	49.125	12.7678	97.798	-0.100653	-1.31405
3.51267	49.2039	12.7671	97.7925	-0.100627	-1.31372
3.521	49.2856	12.7664	97.7868	-0.1006	-1.31337
3.52933	49.37	12.7657	97.7813	-0.100573	-1.313
3.53767	49.4538	12.765	97.7762	-0.100546	-1.31266
3.546	49.536	12.7643	97.7712	-0.10052	-1.31232
3.55433	49.6174	12.7637	97.7661	-0.100492	-1.31195
3.56267	49.6974	12.763	97.7609	-0.100464	-1.31159
3.571	49.7807	12.7623	97.7556	-0.100438	-1.31124
3.57933	49.8643	12.7616	97.7503	-0.100407	-1.31084
3.58767	49.9517	12.7609	97.7448	-0.100376	-1.31043
3.596	50.0262	12.7602	97.7396	-0.100346	-1.31005
3.60433	50.1117	12.7596	97.7347	-0.100315	-1.30964
3.61267	50.1927	12.7589	97.7297	-0.10028	-1.30919
3.621	50.2737	12.7582	97.7243	-0.100245	-1.30873
3.62933	50.3556	12.7575	97.7186	-0.100208	-1.30824
3.63767	50.4366	12.7567	97.713	-0.100171	-1.30776
3.646	50.5188	12.7561	97.7077	-0.100136	-1.30731
3.65433	50.6039	12.7554	97.7025	-0.100101	-1.30685
3.66267	50.6801	12.7547	97.6976	-0.100068	-1.30641
3.671	50.7668	12.7541	97.6927	-0.100028	-1.30589
3.67933	50.8531	12.7534	97.6876	-0.0999867	-1.30536
3.68767	50.9247	12.7528	97.6824	-0.0999485	-1.30486
3.696	51.0092	12.752	97.6769	-0.0999148	-1.30442
3.70433	51.0886	12.7514	97.6717	-0.0998797	-1.30396
3.71267	51.1741	12.7507	97.6666	-0.0998422	-1.30347
3.721	51.2501	12.7501	97.6618	-0.099805	-1.30298
3.72933	51.3311	12.7494	97.6569	-0.0997684	-1.30251
3.73767	51.4157	12.7488	97.6521	-0.0997295	-1.302
3.746	51.4922	12.7481	97.6469	-0.0996913	-1.3015
3.75433	51.5716	12.7474	97.6416	-0.0996544	-1.30102
3.76267	51.6553	12.7468	97.6365	-0.0996194	-1.30056
3.771	51.7362	12.7461	97.6314	-0.0995806	-1.30005
3.77933	51.822	12.7454	97.6265	-0.0995393	-1.29952
3.78767	51.9001	12.7448	97.6215	-0.099501	-1.29902
3.796	51.9753	12.7442	97.6166	-0.0994615	-1.2985
3.80433	52.0639	12.7435	97.6116	-0.0994214	-1.29798
3.81267	52.1436	12.7429	97.6066	-0.0993819	-1.29746
3.821	52.2223	12.7422	97.6016	-0.0993399	-1.29691
3.82933	52.3051	12.7416	97.5967	-0.0993003	-1.29639
3.83767	52.3902	12.7409	97.5919	-0.0992614	-1.29589
3.846	52.4672	12.7403	97.5867	-0.0992202	-1.29535
3.85433	52.5449	12.7396	97.5818	-0.0991795	-1.29482
3.86267	52.6258	12.739	97.5768	-0.0991401	-1.2943
3.871	52.7064	12.7383	97.5719	-0.0991007	-1.29379
3.87933	52.7923	12.7377	97.5668	-0.0990626	-1.29329
3.88767	52.871	12.737	97.5618	-0.099023	-1.29278
3.896	52.9513	12.7363	97.5567	-0.0989811	-1.29223
3.90433	53.0303	12.7357	97.5516	-0.0989419	-1.29172
3.91267	53.1066	12.735	97.5467	-0.0989033	-1.29121
3.921	53.1864	12.7344	97.5418	-0.0988637	-1.29069
3.92933	53.2727	12.7337	97.5368	-0.0988258	-1.2902
3.93767	53.3485	12.7331	97.532	-0.0987891	-1.28972
3.946	53.4313	12.7325	97.5271	-0.0987496	-1.28921
3.95433	53.5129	12.7318	97.5222	-0.0987087	-1.28867
3.96267	53.5887	12.7312	97.5173	-0.0986711	-1.28818
3.971	53.6726	12.7306	97.5124	-0.098632	-1.28767
3.97933	53.7508	12.7299	97.5075	-0.0985927	-1.28716
3.98767	53.8267	12.7293	97.5025	-0.0985528	-1.28664
3.996	53.9088	12.7286	97.4971	-0.0985123	-1.28611
4.00433	53.9849	12.7279	97.4918	-0.0984747	-1.28562
4.01267	54.0679	12.7272	97.4867	-0.0984348	-1.2851
4.021	54.1442	12.7265	97.4815	-0.0983967	-1.2846
4.02933	54.2233	12.7259	97.4764	-0.0983591	-1.28411
4.03767	54.3067	12.7252	97.4715	-0.0983221	-1.28362
4.046	54.3895	12.7246	97.467	-0.0982809	-1.28309
4.05433	54.4707	12.724	97.4624	-0.0982436	-1.2826
4.06267	54.5481	12.7234	97.4577	-0.0982066	-1.28212
4.071	54.6283	12.7228	97.4533	-0.0981707	-1.28165
4.07933	54.7118	12.7223	97.449	-0.0981321	-1.28114
4.08767	54.7953	12.7217	97.4445	-0.0980923	-1.28062
4.096	54.8713	12.7211	97.4401	-0.0980541	-1.28013
4.10433	54.9502	12.7206	97.4358	-0.0980161	-1.27963
4.11267	55.0317	12.72	97.4315	-0.0979784	-1.27914
4.121	55.1145	12.7194	97.4271	-0.0979392	-1.27862
4.12933	55.1894	12.7188	97.4224	-0.0978995	-1.27811
4.13767	55.2723	12.7182	97.4176	-0.0978601	-1.27759
4.146	55.3521	12.7175	97.4128	-0.0978202	-1.27707
4.15433	55.4307	12.7169	97.408	-0.0977783	-1.27652
4.16267	55.5124	12.7163	97.4031	-0.0977384	-1.276
4.171	55.5934	12.7157	97.3986	-0.0976993	-1.27549
4.17933	55.6742	12.7151	97.3941	-0.0976614	-1.275
4.18767	55.7552	12.7145	97.3894	-0.0976179	-1.27443
4.196	55.8353	12.7139	97.3848	-0.0975786	-1.27392
4.20433	55.91	12.7133	97.3801	-0.0975426	-1.27345
4.21267	55.9904	12.7127	97.3753	-0.0975068	-1.27298
4.221	56.0721	12.7121	97.3707	-0.0974691	-1.27249
4.22933	56.1504	12.7114	97.3661	-0.0974334	-1.27202
4.23767	56.2341	12.7108	97.3614	-0.0973977	-1.27156
4.246	56.3124	12.7103	97.3569	-0.0973602	-1.27107
4.25433	56.3849	12.7097	97.3523	-0.0973219	-1.27057
4.26267	56.4657	12.709	97.3476	-0.0972829	-1.27006
4.271	56.5486	12.7084	97.3429	-0.0972466	-1.26958
4.27933	56.6255	12.7078	97.3382	-0.0972109	-1.26912
4.28767	56.704	12.7072	97.3336	-0.0971715	-1.2686
4.296	56.7846	12.7066	97.3288	-0.0971311	-1.26808
4.30433	56.87	12.706	97.324	-0.0970919	-1.26756
4.31267	56.9453	12.7053	97.3193	-0.0970523	-1.26705
4.321	57.0263	12.7047	97.3143	-0.0970122	-1.26652
4.32933	57.1088	12.704	97.3092	-0.0969737	-1.26602
4.33767	57.1853	12.7034	97.3043	-0.0969375	-1.26555
4.346	57.2652	12.7028	97.2996	-0.0969018	-1.26508
4.35433	57.3458	12.7021	97.2948	-0.0968648	-1.2646
4.36267	57.4241	12.7015	97.2901	-0.0968271	-1.26411
4.371	57.5026	12.7009	97.2856	-0.0967915	-1.26364
4.37933	57.5878	12.7003	97.2807	-0.0967597	-1.26323
4.38767	57.6678	12.6997	97.276	-0.0967281	-1.26281
4.396	57.7452	12.6991	97.2715	-0.0966925	-1.26235
4.40433	57.8272	12.6985	97.2671	-0.0966588	-1.26191
4.41267	57.9022	12.6979	97.2626	-0.0966246	-1.26146
4.421	57.9838	12.6974	97.2581	-0.0965891	-1.261
4.42933	58.0679	12.6967	97.2534	-0.0965511	-1.2605
4.43767	58.1448	12.6961	97.2488	-0.0965179	-1.26007
4.446	58.2208	12.6955	97.2442	-0.0964827	-1.25961
4.45433	58.3016	12.6949	97.2394	-0.0964486	-1.25917
4.46267	58.38	12.6943	97.235	-0.0964139	-1.25871
4.471	58.4628	12.6937	97.2305	-0.0963784	-1.25825
4.47933	58.5388	12.6932	97.226	-0.0963473	-1.25784
4.48767	58.6197	12.6926	97.2215	-0.0963173	-1.25745
4.496	58.7021	12.692	97.2169	-0.0962879	-1.25707
4.50433	58.7771	12.6913	97.2121	-0.0962582	-1.25668
4.51267	58.859	12.6907	97.2074	-0.0962336	-1.25636
4.521	58.9421	12.6901	97.2027	-0.0962051	-1.25599
4.52933	59.0196	12.6895	97.1978	-0.0961773	-1.25562
4.53767	59.102	12.6889	97.1931	-0.0961497	-1.25526
4.546	59.1781	12.6882	97.1882	-0.0961233	-1.25492
4.55433	59.2646	12.6876	97.1834	-0.0961004	-1.25462
4.56267	59.3392	12.687	97.1785	-0.0960753	-1.25429
4.571	59.4182	12.6863	97.1738	-0.0960506	-1.25397
4.57933	59.4973	12.6857	97.169	-0.0960293	-1.25369
4.58767	59.5779	12.6851	97.1644	-0.0960084	-1.25342
4.596	59.6544	12.6845	97.1597	-0.0959867	-1.25314
4.60433	59.7321	12.6839	97.155	-0.0959678	-1.25289
4.61267	59.8149	12.6832	97.15	-0.0959536	-1.2527
4.621	59.8918	12.6826	97.1451	-0.0959391	-1.25251
4.62933	59.9702	12.682	97.1402	-0.0959244	-1.25232
4.63767	60.0556	12.6813	97.1353	-0.0959092	-1.25212
4.646	60.1294	12.6807	97.1303	-0.0958975	-1.25197
4.65433	60.2122	12.68	97.1254	-0.095886	-1.25182
4.66267	60.2915	12.6794	97.1203	-0.0958742	-1.25167
4.671	60.3692	12.6787	97.1155	-0.0958674	-1.25158
4.67933	60.4516	12.6781	97.1106	-0.0958604	-1.25149
4.68767	60.5288	12.6774	97.1055	-0.0958559	-1.25143
4.696	60.6106	12.6768	97.1007	-0.0958506	-1.25136
4.70433	60.6885	12.6762	97.0957	-0.0958476	-1.25132
4.71267	60.7687	12.6755	97.0908	-0.0958461	-1.2513
4.721	60.8445	12.6749	97.0859	-0.0958459	-1.2513
4.72933	60.9228	12.6742	97.0809	-0.0958462	-1.2513
4.73767	61.0015	12.6736	97.0759	-0.0958493	-1.25134
4.746	61.0874	12.6729	97.0711	-0.095851	-1.25136
4.75433	61.163	12.6723	97.0659	-0.0958514	-1.25137
4.76267	61.2402	12.6716	97.0608	-0.0958543	-1.25141
4.771	61.3229	12.6709	97.0556	-0.0958586	-1.25146
4.77933	61.4041	12.6702	97.0504	-0.0958628	-1.25152
4.78767	61.4886	12.6696	97.0453	-0.0958687	-1.25159
4.796	61.5615	12.6689	97.0401	-0.0958738	-1.25166
4.80433	61.6501	12.6682	97.0348	-0.0958801	-1.25174
4.81267	61.7248	12.6675	97.0296	-0.0958886	-1.25185
4.821	61.802	12.6668	97.0239	-0.0958973	-1.25197
4.82933	61.8844	12.6661	97.0183	-0.0959089	-1.25212
4.83767	61.9611	12.6653	97.0128	-0.0959233	-1.25231
4.846	62.0451	12.6646	97.0074	-0.0959431	-1.25257
4.85433	62.1264	12.664	97.0023	-0.0959602	-1.25279
4.86267	62.2022	12.6633	96.9972	-0.095976	-1.253
4.871	62.2839	12.6626	96.992	-0.0959935	-1.25322
4.87933	62.3633	12.6619	96.9867	-0.0960162	-1.25352
4.88767	62.4423	12.6613	96.9815	-0.0960405	-1.25384
4.896	62.5186	12.6605	96.9759	-0.0960647	-1.25415
4.90433	62.5977	12.6598	96.9707	-0.0960886	-1.25446
4.91267	62.6759	12.6591	96.9654	-0.0961124	-1.25478
4.921	62.7557	12.6585	96.9602	-0.0961374	-1.2551
4.92933	62.8369	12.6578	96.9548	-0.0961621	-1.25543
4.93767	62.9128	12.657	96.9493	-0.0961907	-1.2558
4.946	62.9959	12.6563	96.9435	-0.0962199	-1.25618
4.95433	63.0746	12.6556	96.938	-0.0962502	-1.25657
4.96267	63.1521	12.6548	96.9324	-0.0962782	-1.25694
4.971	63.2345	12.6541	96.9269	-0.0963096	-1.25735
4.97933	63.3201	12.6534	96.9217	-0.0963433	-1.25779
4.98767	63.3915	12.6527	96.9164	-0.0963798	-1.25827
4.996	63.4736	12.652	96.911	-0.096418	-1.25877
5.00433	63.5519	12.6513	96.9052	-0.0964535	-1.25923
5.01267	63.6293	12.6506	96.8997	-0.0964879	-1.25968
5.021	63.7191	12.6499	96.8943	-0.0965248	-1.26016
5.02933	63.7938	12.6491	96.8887	-0.0965632	-1.26066
5.03767	63.8725	12.6484	96.8829	-0.0966048	-1.2612
5.046	63.9579	12.6476	96.877	-0.0966473	-1.26176
5.05433	64.0332	12.6469	96.8712	-0.0966895	-1.26231
5.06267	64.1106	12.6461	96.8654	-0.0967334	-1.26288
5.071	64.1949	12.6453	96.8596	-0.096774	-1.26341
5.07933	64.2729	12.6445	96.8535	-0.0968208	-1.26402
5.08767	64.3517	12.6438	96.8477	-0.0968704	-1.26467
5.096	64.4322	12.643	96.8417	-0.0969199	-1.26532
5.10433	64.5161	12.6422	96.8358	-0.0969694	-1.26597
5.11267	64.5939	12.6415	96.83	-0.0970223	-1.26666
5.121	64.6737	12.6407	96.824	-0.0970727	-1.26731
5.12933	64.7519	12.6399	96.8179	-0.0971223	-1.26796
5.13767	64.8318	12.6391	96.8119	-0.0971732	-1.26862
5.146	64.9143	12.6383	96.8057	-0.097225	-1.2693
5.15433	64.9943	12.6375	96.7995	-0.0972793	-1.27001
5.16267	65.0721	12.6367	96.7933	-0.0973319	-1.2707
5.171	65.1479	12.6359	96.7873	-0.0973872	-1.27142
5.17933	65.2351	12.6351	96.7813	-0.0974436	-1.27216
5.18767	65.3127	12.6343	96.7753	-0.097501	-1.2729
5.196	65.3922	12.6336	96.7694	-0.0975585	-1.27365
5.20433	65.4748	12.6328	96.7636	-0.0976166	-1.27441
5.21267	65.5573	12.632	96.7577	-0.0976791	-1.27523
5.221	65.6331	12.6312	96.7517	-0.0977392	-1.27601
5.22933	65.7241	12.6304	96.7455	-0.0978005	-1.27682
5.23767	65.7972	12.6296	96.7394	-0.0978636	-1.27764
5.246	65.873	12.6289	96.7337	-0.0979251	-1.27844
5.25433	65.95	12.6281	96.7277	-0.0979885	-1.27927
5.26267	66.0356	12.6273	96.7216	-0.0980547	-1.28013
5.271	66.1126	12.6265	96.7155	-0.0981184	-1.28096
5.27933	66.1855	12.6257	96.7094	-0.098184	-1.28182
5.28767	66.2749	12.6249	96.7033	-0.098252	-1.28271
5.296	66.352	12.6241	96.6971	-0.0983186	-1.28358
5.30433	66.4353	12.6233	96.6909	-0.0983867	-1.28447
5.31267	66.5138	12.6225	96.6847	-0.0984558	-1.28537
5.321	66.598	12.6217	96.6785	-0.0985269	-1.2863
5.32933	66.6791	12.6209	96.6722	-0.0985969	-1.28721
5.33767	66.757	12.62	96.6659	-0.0986652	-1.2881
5.346	66.8351	12.6192	96.6592	-0.0987317	-1.28897
5.35433	66.9163	12.6183	96.6525	-0.0988018	-1.28989
5.36267	66.9981	12.6174	96.6457	-0.0988711	-1.29079
5.371	67.0784	12.6165	96.6391	-0.0989407	-1.2917
5.37933	67.156	12.6157	96.6326	-0.0990124	-1.29264
5.38767	67.2389	12.6149	96.6264	-0.0990827	-1.29355
5.396	67.3214	12.614	96.6199	-0.0991561	-1.29451
5.40433	67.3988	12.6132	96.6133	-0.0992295	-1.29547
5.41267	67.4854	12.6123	96.6067	-0.0993046	-1.29645
5.421	67.5609	12.6115	96.6002	-0.0993802	-1.29744
5.42933	67.6443	12.6106	96.5938	-0.0994556	-1.29842
5.43767	67.7254	12.6098	96.5874	-0.0995308	-1.2994
5.446	67.81	12.609	96.5809	-0.0996062	-1.30039
5.45433	67.8883	12.6081	96.5745	-0.099681	-1.30137
5.46267	67.9654	12.6072	96.5678	-0.0997556	-1.30234
5.471	68.048	12.6063	96.5609	-0.0998332	-1.30335
5.47933	68.1277	12.6054	96.554	-0.0999086	-1.30434
5.48767	68.2104	12.6045	96.5472	-0.0999841	-1.30532
5.496	68.2918	12.6037	96.5403	-0.100059	-1.3063
5.50433	68.3737	12.6028	96.5337	-0.100135	-1.30729
5.51267	68.4541	12.6019	96.5271	-0.100211	-1.30828
5.521	68.5364	12.6011	96.5205	-0.100287	-1.30928
5.52933	68.6148	12.6001	96.5135	-0.100364	-1.31029
5.53767	68.6957	12.5992	96.5066	-0.100442	-1.3113
5.546	68.7744	12.5983	96.4997	-0.100519	-1.31231
5.55433	68.8534	12.5975	96.4931	-0.100598	-1.31333
5.56267	68.9387	12.5967	96.4868	-0.100672	-1.3143
5.571	69.0204	12.5958	96.4804	-0.100748	-1.31529
5.57933	69.1021	12.595	96.4738	-0.100827	-1.31633
5.58767	69.18	12.5941	96.4669	-0.100905	-1.31735
5.596	69.2624	12.5932	96.4601	-0.100983	-1.31837
5.60433	69.3423	12.5923	96.4533	-0.101062	-1.31939
5.61267	69.4235	12.5914	96.4468	-0.101138	-1.32039
5.621	69.5057	12.5906	96.44	-0.101215	-1.32139
5.62933	69.5828	12.5897	96.4336	-0.101295	-1.32243
5.63767	69.6711	12.5888	96.4269	-0.101374	-1.32347
5.646	69.7525	12.5879	96.42	-0.101457	-1.32455
5.65433	69.8324	12.587	96.4129	-0.101538	-1.32561
5.66267	69.9121	12.5861	96.4059	-0.101618	-1.32666
5.671	69.9914	12.5852	96.3992	-0.101697	-1.32769
5.67933	70.0757	12.5843	96.392	-0.101777	-1.32873
5.68767	70.1546	12.5834	96.3852	-0.101857	-1.32977
5.696	70.2412	12.5825	96.3783	-0.101936	-1.33081
5.70433	70.318	12.5816	96.3714	-0.102016	-1.33185
5.71267	70.4008	12.5807	96.3643	-0.102094	-1.33287
5.721	70.4831	12.5798	96.3573	-0.102171	-1.33387
5.72933	70.5662	12.5788	96.3502	-0.102246	-1.33485
5.73767	70.6435	12.5779	96.3431	-0.102318	-1.3358
5.746	70.719	12.577	96.3361	-0.102394	-1.33679
5.75433	70.807	12.5761	96.3292	-0.102472	-1.3378
5.76267	70.8874	12.5752	96.3221	-0.10255	-1.33882
5.771	70.9693	12.5742	96.315	-0.102629	-1.33985
5.77933	71.0574	12.5733	96.3078	-0.102708	-1.34088
5.78767	71.1352	12.5724	96.3006	-0.102786	-1.3419
5.796	71.2151	12.5714	96.2935	-0.102865	-1.34294
5.80433	71.2928	12.5705	96.2863	-0.102944	-1.34397
5.81267	71.3766	12.5696	96.2794	-0.103022	-1.34498
5.821	71.4541	12.5687	96.2726	-0.103103	-1.34604
5.82933	71.5415	12.5678	96.2654	-0.10318	-1.34704
5.83767	71.6235	12.5669	96.2585	-0.103256	-1.34804
5.846	71.7012	12.566	96.2516	-0.103334	-1.34906
5.85433	71.7813	12.5651	96.2447	-0.103411	-1.35006
5.86267	71.868	12.5642	96.2379	-0.103487	-1.35105
5.871	71.9496	12.5633	96.2309	-0.103566	-1.35208
5.87933	72.0347	12.5624	96.224	-0.103643	-1.35308
5.88767	72.1104	12.5614	96.2169	-0.10372	-1.35409
5.896	72.1889	12.5605	96.2099	-0.103802	-1.35517
5.90433	72.2737	12.5596	96.2029	-0.103882	-1.35621
5.91267	72.3586	12.5587	96.1958	-0.103961	-1.35724
5.921	72.4374	12.5577	96.1881	-0.104041	-1.35828
5.92933	72.5205	12.5567	96.1809	-0.104119	-1.35931
5.93767	72.602	12.5558	96.1735	-0.104198	-1.36034
5.946	72.6827	12.5548	96.1663	-0.104276	-1.36135
5.95433	72.766	12.5539	96.1591	-0.104352	-1.36235
5.96267	72.8438	12.5529	96.1517	-0.10443	-1.36337
5.971	72.9278	12.5519	96.1443	-0.104508	-1.36438
5.97933	73.0121	12.551	96.1369	-0.10458	-1.36532
5.98767	73.0974	12.55	96.1294	-0.104656	-1.36631
5.996	73.1754	12.549	96.1221	-0.104732	-1.3673
6.00433	73.2596	12.5481	96.1152	-0.104804	-1.36825
6.01267	73.3432	12.5472	96.1081	-0.104879	-1.36923
6.021	73.424	12.5463	96.1007	-0.104955	-1.37022
6.02933	73.5043	12.5453	96.0933	-0.105032	-1.37122
6.03767	73.5919	12.5443	96.086	-0.105108	-1.37222
6.046	73.6636	12.5434	96.0789	-0.105182	-1.37319
6.05433	73.7454	12.5425	96.0719	-0.105258	-1.37418
6.06267	73.8297	12.5415	96.0646	-0.105334	-1.37517
6.071	73.9101	12.5406	96.0572	-0.105407	-1.37611
6.07933	73.995	12.5396	96.05	-0.105482	-1.3771
6.08767	74.071	12.5387	96.0426	-0.10556	-1.37812
6.096	74.1625	12.5377	96.0352	-0.105635	-1.37909
6.10433	74.2404	12.5367	96.0277	-0.105708	-1.38005
6.11267	74.3204	12.5358	96.0204	-0.105781	-1.38101
6.121	74.4055	12.5348	96.013	-0.105852	-1.38194
6.12933	74.4875	12.5338	96.0056	-0.10593	-1.38295
6.13767	74.5705	12.5329	95.9983	-0.106005	-1.38393
6.146	74.6525	12.5319	95.9911	-0.10608	-1.38491
6.15433	74.7354	12.531	95.9838	-0.106156	-1.3859
6.16267	74.8183	12.53	95.9761	-0.10623	-1.38686
6.171	74.9007	12.529	95.9687	-0.106304	-1.38783
6.17933	74.9844	12.528	95.9611	-0.106377	-1.38878
6.18767	75.0633	12.527	95.9536	-0.106451	-1.38975
6.196	75.1466	12.5261	95.9463	-0.106526	-1.39073
6.20433	75.2286	12.5251	95.939	-0.106602	-1.39172
6.21267	75.3131	12.5241	95.9313	-0.106672	-1.39263
6.221	75.3899	12.5231	95.9236	-0.106743	-1.39356
6.22933	75.4744	12.5221	95.9159	-0.106817	-1.39453
6.23767	75.5592	12.5211	95.9083	-0.106891	-1.39549
6.246	75.6403	12.5201	95.9008	-0.106962	-1.39643
6.25433	75.7261	12.5192	95.8933	-0.107033	-1.39735
6.26267	75.8051	12.5182	95.886	-0.107107	-1.39831
6.271	75.8864	12.5173	95.8787	-0.107177	-1.39923
6.27933	75.9702	12.5163	95.871	-0.107248	-1.40015
6.28767	76.0576	12.5153	95.8633	-0.107316	-1.40104
6.296	76.1344	12.5143	95.8556	-0.107387	-1.40197
6.30433	76.2174	12.5133	95.848	-0.107457	-1.40288
6.31267	76.3021	12.5123	95.8405	-0.107526	-1.40378
6.321	76.3841	12.5113	95.8329	-0.107596	-1.4047
6.32933	76.4624	12.5103	95.8252	-0.107667	-1.40563
6.33767	76.5456	12.5093	95.8174	-0.107735	-1.40651
6.346	76.6291	12.5083	95.8097	-0.107803	-1.4074
6.35433	76.7094	12.5073	95.802	-0.107872	-1.40831
6.36267	76.7956	12.5063	95.7944	-0.10794	-1.40919
6.371	76.8813	12.5053	95.7867	-0.108011	-1.41011
6.37933	76.9623	12.5043	95.7793	-0.10808	-1.41102
6.38767	77.0453	12.5033	95.7718	-0.108148	-1.41191
6.396	77.1259	12.5023	95.7643	-0.108217	-1.41281
6.40433	77.2106	12.5014	95.7567	-0.108286	-1.4137
6.41267	77.2875	12.5004	95.7492	-0.108351	-1.41455
6.421	77.3701	12.4994	95.7416	-0.108417	-1.41541
6.42933	77.4582	12.4984	95.734	-0.108484	-1.41629
6.43767	77.5343	12.4974	95.7263	-0.108552	-1.41718
6.446	77.6177	12.4964	95.7188	-0.108621	-1.41808
6.45433	77.6964	12.4954	95.7113	-0.108689	-1.41897
6.46267	77.7834	12.4944	95.7037	-0.108755	-1.41983
6.471	77.8651	12.4934	95.696	-0.108823	-1.42071
6.47933	77.9475	12.4924	95.688	-0.108887	-1.42155
6.48767	78.0334	12.4914	95.6802	-0.108951	-1.42239
6.496	78.1164	12.4903	95.6724	-0.109017	-1.42324
6.50433	78.1947	12.4893	95.6648	-0.109083	-1.42411
6.51267	78.2806	12.4883	95.6571	-0.10915	-1.42498
6.521	78.3612	12.4873	95.6494	-0.109214	-1.42582
6.52933	78.4451	12.4863	95.6414	-0.109277	-1.42665
6.53767	78.5269	12.4853	95.6337	-0.10934	-1.42746
6.546	78.6129	12.4842	95.6258	-0.109404	-1.4283
6.55433	78.6937	12.4832	95.6181	-0.109468	-1.42914
6.56267	78.7767	12.4823	95.6108	-0.109533	-1.42998
6.571	78.8653	12.4813	95.6035	-0.109595	-1.4308
6.57933	78.9453	12.4804	95.596	-0.109661	-1.43165
6.58767	79.0257	12.4794	95.5882	-0.109723	-1.43247
6.596	79.1054	12.4783	95.5805	-0.109783	-1.43325
6.60433	79.1901	12.4773	95.5725	-0.109844	-1.43405
6.61267	79.2729	12.4763	95.5648	-0.109907	-1.43486
6.621	79.3559	12.4753	95.557	-0.109966	-1.43564
6.62933	79.4398	12.4742	95.5491	-0.110024	-1.4364
6.63767	79.5181	12.4732	95.5412	-0.110084	-1.43718
6.646	79.6018	12.4722	95.5332	-0.110142	-1.43794
6.65433	79.6851	12.4711	95.5251	-0.110204	-1.43874
6.66267	79.765	12.4701	95.5172	-0.110264	-1.43952
6.671	79.8473	12.4691	95.5095	-0.110325	-1.44033
6.67933	79.9333	12.4681	95.5018	-0.110385	-1.44111
6.68767	80.0148	12.467	95.4939	-0.110444	-1.44188
6.696	80.095	12.4661	95.4864	-0.110499	-1.4426
6.70433	80.1798	12.4651	95.4788	-0.110559	-1.44339
6.71267	80.2591	12.4641	95.4711	-0.110621	-1.44418
6.721	80.3433	12.463	95.4633	-0.110678	-1.44494
6.72933	80.4296	12.462	95.4556	-0.110736	-1.44569
6.73767	80.5115	12.4611	95.4481	-0.110791	-1.44641
6.746	80.5918	12.4601	95.4406	-0.110846	-1.44713
6.75433	80.6794	12.4591	95.433	-0.1109	-1.44784
6.76267	80.757	12.4581	95.4253	-0.110956	-1.44857
6.771	80.839	12.457	95.4173	-0.111011	-1.44928
6.77933	80.9233	12.456	95.4092	-0.111064	-1.44998
6.78767	81.0065	12.4549	95.4012	-0.111115	-1.45064
6.796	81.0885	12.4539	95.3934	-0.111163	-1.45127
6.80433	81.1727	12.4529	95.3856	-0.111213	-1.45192
6.81267	81.2553	12.4519	95.3776	-0.111263	-1.45257
6.821	81.3393	12.4508	95.3699	-0.111312	-1.45321
6.82933	81.4204	12.4498	95.3618	-0.11136	-1.45383
6.83767	81.5032	12.4487	95.3538	-0.111406	-1.45444
6.846	81.5893	12.4477	95.3459	-0.111449	-1.455
6.85433	81.6714	12.4467	95.3383	-0.111493	-1.45557
6.86267	81.7585	12.4458	95.3309	-0.111542	-1.45621
6.871	81.8371	12.4447	95.3231	-0.11159	-1.45684
6.87933	81.9202	12.4437	95.3155	-0.111638	-1.45746
6.88767	81.9998	12.4428	95.3079	-0.111678	-1.45798
6.896	82.0875	12.4418	95.3002	-0.111718	-1.45851
6.90433	82.1707	12.4407	95.2926	-0.111757	-1.45902
6.91267	82.2522	12.4398	95.2851	-0.111794	-1.4595
6.921	82.3359	12.4388	95.2776	-0.111832	-1.46
6.92933	82.4169	12.4378	95.2701	-0.111873	-1.46053
6.93767	82.5052	12.4369	95.2628	-0.111909	-1.46101
6.946	82.5933	12.4359	95.2552	-0.111941	-1.46142
6.95433	82.6715	12.4349	95.2476	-0.111973	-1.46184
6.96267	82.7506	12.4339	95.2398	-0.112003	-1.46224
6.971	82.8336	12.4329	95.2321	-0.112037	-1.46267
6.97933	82.9157	12.4319	95.2244	-0.112066	-1.46305
6.98767	83.0011	12.4309	95.2168	-0.112095	-1.46343
6.996	83.0819	12.4299	95.2093	-0.112123	-1.4638
7.00433	83.1721	12.4289	95.2018	-0.112149	-1.46414
7.01267	83.252	12.4279	95.1941	-0.112171	-1.46442
7.021	83.3394	12.4269	95.1864	-0.112189	-1.46466
7.02933	83.4223	12.4259	95.1787	-0.112208	-1.46491
7.03767	83.5008	12.4249	95.1712	-0.112227	-1.46515
7.046	83.5853	12.4239	95.1638	-0.112244	-1.46538
7.05433	83.6678	12.423	95.1565	-0.112261	-1.4656
7.06267	83.7539	12.422	95.1493	-0.112278	-1.46582
7.071	83.8382	12.4211	95.1419	-0.112293	-1.46602
7.07933	83.9214	12.4201	95.1345	-0.112306	-1.46619
7.08767	84.0018	12.4191	95.127	-0.112313	-1.46629
7.096	84.0847	12.4182	95.1195	-0.112322	-1.4664
7.10433	84.1725	12.4172	95.1121	-0.112335	-1.46656
7.11267	84.254	12.4162	95.1048	-0.112345	-1.46669
7.121	84.3393	12.4153	95.0978	-0.112347	-1.46673
7.12933	84.4168	12.4144	95.0908	-0.11235	-1.46676
7.13767	84.5015	12.4135	95.0837	-0.112351	-1.46677
7.146	84.5827	12.4125	95.0765	-0.11235	-1.46677
7.15433	84.669	12.4116	95.0693	-0.112348	-1.46674
7.16267	84.7502	12.4106	95.0619	-0.112347	-1.46672
7.171	84.8333	12.4097	95.0549	-0.112346	-1.46671
7.17933	84.9218	12.4088	95.0479	-0.112343	-1.46668
7.18767	85.0043	12.4079	95.0407	-0.112336	-1.46658
7.196	85.0822	12.4069	95.0335	-0.112327	-1.46647
7.20433	85.1677	12.406	95.0263	-0.112321	-1.46638
7.21267	85.25	12.4051	95.0193	-0.112311	-1.46625
7.221	85.3389	12.4042	95.0124	-0.1123	-1.4661
7.22933	85.4234	12.4033	95.0054	-0.112289	-1.46597
7.23767	85.5039	12.4024	94.9985	-0.112276	-1.4658
7.246	85.5899	12.4014	94.9915	-0.112259	-1.46557
7.25433	85.6764	12.4005	94.9846	-0.11224	-1.46533
7.26267	85.7571	12.3997	94.978	-0.11222	-1.46507
7.271	85.8411	12.3988	94.9715	-0.112196	-1.46476
7.27933	85.9243	12.398	94.965	-0.11217	-1.46441
7.28767	86.0107	12.3971	94.9582	-0.11214	-1.46402
7.296	86.0921	12.3962	94.9513	-0.112111	-1.46365
7.30433	86.1733	12.3953	94.9444	-0.11208	-1.46324
7.31267	86.2554	12.3944	94.9375	-0.112046	-1.4628
7.321	86.3458	12.3935	94.9307	-0.112012	-1.46236
7.32933	86.4308	12.3927	94.9242	-0.11198	-1.46193
7.33767	86.5066	12.3918	94.9176	-0.111943	-1.46145
7.346	86.593	12.3909	94.911	-0.111904	-1.46094
7.35433	86.6792	12.3901	94.9045	-0.111869	-1.46048
7.36267	86.76	12.3892	94.8979	-0.111832	-1.46
7.371	86.8438	12.3884	94.8915	-0.111793	-1.4595
7.37933	86.931	12.3876	94.8852	-0.111751	-1.45894
7.38767	87.0138	12.3867	94.8789	-0.111707	-1.45837
7.396	87.0966	12.3859	94.8727	-0.111659	-1.45775
7.40433	87.1814	12.3851	94.8665	-0.11161	-1.4571
7.41267	87.2668	12.3843	94.8601	-0.111559	-1.45644
7.421	87.3533	12.3835	94.8538	-0.111509	-1.45579
7.42933	87.4331	12.3826	94.8475	-0.111458	-1.45512
7.43767	87.5183	12.3818	94.841	-0.111402	-1.45439
7.446	87.6031	12.381	94.8347	-0.111344	-1.45363
7.45433	87.6846	12.3802	94.8285	-0.111287	-1.45289
7.46267	87.7703	12.3793	94.8221	-0.111229	-1.45212
7.471	87.851	12.3785	94.816	-0.111171	-1.45138
7.47933	87.938	12.3777	94.8099	-0.111113	-1.45061
7.48767	88.0205	12.377	94.8039	-0.111052	-1.44981
7.496	88.1036	12.3762	94.7979	-0.110989	-1.44899
7.50433	88.1906	12.3754	94.7919	-0.110921	-1.44811
7.51267	88.2789	12.3746	94.7857	-0.110855	-1.44725
7.521	88.3655	12.3738	94.7798	-0.110787	-1.44636
7.52933	88.4427	12.373	94.7739	-0.11072	-1.44549
7.53767	88.529	12.3723	94.768	-0.110648	-1.44455
7.546	88.6153	12.3715	94.7621	-0.110575	-1.44359
7.55433	88.698	12.3707	94.7563	-0.110498	-1.44258
7.56267	88.7875	12.37	94.7508	-0.110418	-1.44154
7.571	88.8724	12.3693	94.7451	-0.110336	-1.44047
7.57933	88.9494	12.3685	94.7392	-0.110256	-1.43942
7.58767	89.0347	12.3678	94.7335	-0.110176	-1.43838
7.596	89.1219	12.367	94.7278	-0.11009	-1.43725
7.60433	89.2082	12.3663	94.7221	-0.110001	-1.4361
7.61267	89.2889	12.3655	94.7165	-0.109914	-1.43496
7.621	89.3686	12.3648	94.711	-0.109828	-1.43383
7.62933	89.46	12.3641	94.7057	-0.109737	-1.43265
7.63767	89.542	12.3634	94.6999	-0.109646	-1.43146
7.646	89.6232	12.3626	94.6941	-0.109556	-1.43028
7.65433	89.7118	12.3619	94.6884	-0.109463	-1.42907
7.66267	89.7928	12.3612	94.6829	-0.109368	-1.42783
7.671	89.8809	12.3604	94.6774	-0.109273	-1.42659
7.67933	89.9638	12.3598	94.6721	-0.10918	-1.42538
7.68767	90.0478	12.3591	94.667	-0.10909	-1.4242
7.696	90.1302	12.3584	94.6616	-0.108989	-1.42288
7.70433	90.216	12.3577	94.6561	-0.108888	-1.42157
7.71267	90.3004	12.357	94.6509	-0.108789	-1.42027
7.721	90.3875	12.3563	94.6457	-0.108688	-1.41895
7.72933	90.4708	12.3557	94.6407	-0.108585	-1.4176
7.73767	90.5522	12.355	94.6356	-0.10848	-1.41623
7.746	90.6422	12.3543	94.6305	-0.108373	-1.41485
7.75433	90.7225	12.3537	94.6255	-0.10827	-1.41349
7.76267	90.8094	12.353	94.6203	-0.108161	-1.41207
7.771	90.887	12.3523	94.6151	-0.108049	-1.41061
7.77933	90.9757	12.3516	94.61	-0.107943	-1.40923
7.78767	91.0614	12.351	94.605	-0.107833	-1.40779
7.796	91.1471	12.3503	94.5999	-0.107722	-1.40635
7.80433	91.2354	12.3497	94.5948	-0.10761	-1.40488
7.81267	91.321	12.349	94.5896	-0.107496	-1.40339
7.821	91.4024	12.3483	94.5846	-0.107384	-1.40193
7.82933	91.4875	12.3477	94.5798	-0.107271	-1.40045
7.83767	91.5694	12.347	94.5749	-0.107155	-1.39895
7.846	91.6521	12.3464	94.5699	-0.10704	-1.39743
7.85433	91.7416	12.3458	94.565	-0.106923	-1.39591
7.86267	91.8304	12.3452	94.5603	-0.106804	-1.39436
7.871	91.9119	12.3445	94.5554	-0.106686	-1.39282
7.87933	91.9965	12.3438	94.5503	-0.106566	-1.39125
7.88767	92.0816	12.3432	94.5455	-0.106447	-1.3897
7.896	92.1655	12.3426	94.5408	-0.106331	-1.38818
7.90433	92.2488	12.342	94.5363	-0.106212	-1.38663
7.91267	92.3312	12.3413	94.5311	-0.106093	-1.38508
7.921	92.4133	12.3407	94.5264	-0.105973	-1.38351
7.92933	92.4998	12.3401	94.5218	-0.105854	-1.38196
7.93767	92.584	12.3395	94.5169	-0.105734	-1.38038
7.946	92.6731	12.3388	94.512	-0.105612	-1.3788
7.95433	92.7584	12.3383	94.5074	-0.105493	-1.37724
7.96267	92.8378	12.3377	94.5029	-0.105375	-1.37571
7.971	92.9259	12.3371	94.4985	-0.105256	-1.37415
7.97933	93.0073	12.3365	94.4939	-0.105134	-1.37256
7.98767	93.0921	12.3358	94.489	-0.105013	-1.37098
7.996	93.172	12.3352	94.4844	-0.104891	-1.36939
8.00433	93.2562	12.3346	94.4798	-0.104768	-1.36778
8.01267	93.3448	12.3341	94.4754	-0.104644	-1.36616
8.021	93.428	12.3335	94.4711	-0.104523	-1.36458
8.02933	93.5156	12.3329	94.4668	-0.104399	-1.36296
8.03767	93.6038	12.3324	94.4626	-0.104276	-1.36136
8.046	93.6838	12.3318	94.4584	-0.104154	-1.35976
8.05433	93.7627	12.3312	94.4538	-0.10403	-1.35814
8.06267	93.8472	12.3306	94.4492	-0.103909	-1.35656
8.071	93.9377	12.3301	94.4448	-0.103788	-1.35498
8.07933	94.0221	12.3295	94.4404	-0.103666	-1.35339
8.08767	94.1085	12.3289	94.4358	-0.103545	-1.35181
8.096	94.1894	12.3283	94.4314	-0.103424	-1.35023
8.10433	94.2738	12.3277	94.4269	-0.103301	-1.34863
8.11267	94.3611	12.3271	94.4224	-0.103182	-1.34707
8.121	94.4432	12.3265	94.4178	-0.103062	-1.3455
8.12933	94.5256	12.3259	94.4131	-0.102939	-1.3439
8.13767	94.6116	12.3253	94.4086	-0.102819	-1.34234
8.146	94.7031	12.3248	94.4042	-0.102695	-1.34071
8.15433	94.7816	12.3242	94.4001	-0.102575	-1.33915
8.16267	94.8663	12.3237	94.3959	-0.102456	-1.33759
8.171	94.9533	12.3232	94.3918	-0.102334	-1.336
8.17933	95.0335	12.3226	94.3877	-0.102216	-1.33447
8.18767	95.1223	12.3221	94.3834	-0.102097	-1.33291
8.196	95.2062	12.3215	94.3791	-0.101978	-1.33135
8.20433	95.2891	12.3209	94.3749	-0.101858	-1.32978
8.21267	95.373	12.3204	94.3708	-0.101739	-1.32824
8.221	95.4556	12.3199	94.3667	-0.10162	-1.32668
8.22933	95.5391	12.3194	94.3628	-0.101503	-1.32515
8.23767	95.6291	12.3188	94.3588	-0.101384	-1.3236
8.246	95.7128	12.3183	94.3549	-0.101264	-1.32203
8.25433	95.8	12.3178	94.3508	-0.101144	-1.32047
8.26267	95.8807	12.3172	94.3465	-0.101024	-1.3189
8.271	95.9643	12.3167	94.3424	-0.100908	-1.31738
8.27933	96.0493	12.3162	94.3382	-0.100792	-1.31587
8.28767	96.1306	12.3156	94.3341	-0.100675	-1.31435
8.296	96.2214	12.3151	94.3301	-0.100557	-1.3128
8.30433	96.2979	12.3146	94.3259	-0.10044	-1.31128
8.31267	96.3911	12.314	94.3216	-0.100325	-1.30978
8.321	96.4722	12.3134	94.3174	-0.100208	-1.30825
8.32933	96.5542	12.3129	94.3132	-0.100093	-1.30675
8.33767	96.6458	12.3124	94.3091	-0.0999787	-1.30525
8.346	96.7277	12.3118	94.3051	-0.0998621	-1.30373
8.35433	96.8113	12.3113	94.3011	-0.0997442	-1.30219
8.36267	96.8929	12.3108	94.2972	-0.0996291	-1.30069
8.371	96.9767	12.3103	94.2932	-0.0995168	-1.29922
8.37933	97.057	12.3097	94.289	-0.0994035	-1.29774
8.38767	97.1441	12.3092	94.2851	-0.0992895	-1.29625
8.396	97.2276	12.3087	94.281	-0.0991724	-1.29473
8.40433	97.3143	12.3081	94.2769	-0.0990594	-1.29325
8.41267	97.3989	12.3076	94.2729	-0.0989473	-1.29179
8.421	97.4841	12.3071	94.2689	-0.0988362	-1.29034
8.42933	97.5736	12.3066	94.2651	-0.0987257	-1.28889
8.43767	97.6562	12.3061	94.2611	-0.0986181	-1.28749
8.446	97.7356	12.3056	94.2573	-0.0985034	-1.28599
8.45433	97.8223	12.3051	94.2535	-0.0983882	-1.28449
8.46267	97.9041	12.3046	94.2497	-0.0982761	-1.28302
8.471	97.9915	12.3041	94.2456	-0.0981676	-1.28161
8.47933	98.0744	12.3035	94.2415	-0.0980614	-1.28022
8.48767	98.1609	12.303	94.2375	-0.0979509	-1.27878
8.496	98.2445	12.3025	94.2335	-0.0978387	-1.27731
8.50433	98.3277	12.302	94.2296	-0.0977298	-1.27589
8.51267	98.4145	12.3015	94.2256	-0.0976213	-1.27448
8.521	98.4956	12.301	94.2218	-0.0975114	-1.27304
8.52933	98.5787	12.3004	94.2178	-0.0974054	-1.27166
8.53767	98.6675	12.2999	94.2139	-0.0972986	-1.27026
8.546	98.749	12.2994	94.2102	-0.0971906	-1.26885
8.55433	98.8281	12.299	94.2065	-0.0970807	-1.26742
8.56267	98.9151	12.2985	94.2031	-0.0969723	-1.266
8.571	99.0034	12.298	94.1995	-0.0968662	-1.26462
8.57933	99.085	12.2975	94.1956	-0.0967615	-1.26325
8.58767	99.1698	12.297	94.1915	-0.0966561	-1.26188
8.596	99.2539	12.2965	94.1877	-0.0965527	-1.26052
8.60433	99.3423	12.296	94.1841	-0.0964496	-1.25918
8.61267	99.4229	12.2956	94.1805	-0.096348	-1.25785
8.621	99.5073	12.2951	94.1769	-0.0962471	-1.25653
8.62933	99.5926	12.2946	94.1732	-0.0961465	-1.25522
8.63767	99.6767	12.2941	94.1694	-0.0960468	-1.25392
8.646	99.7595	12.2936	94.1658	-0.0959469	-1.25262
8.65433	99.8448	12.2932	94.1622	-0.0958469	-1.25131
8.66267	99.9283	12.2927	94.1589	-0.0957469	-1.25
8.671	100.014	12.2923	94.1556	-0.0956472	-1.2487
8.67933	100.094	12.2918	94.152	-0.0955492	-1.24742
8.68767	100.182	12.2913	94.1481	-0.0954497	-1.24612
8.696	100.266	12.2908	94.1443	-0.095349	-1.24481
8.70433	100.347	12.2903	94.1403	-0.0952486	-1.2435
8.71267	100.432	12.2898	94.1365	-0.0951534	-1.24226
8.721	100.517	12.2893	94.1328	-0.0950553	-1.24098
8.72933	100.604	12.2889	94.1291	-0.0949578	-1.2397
8.73767	100.689	12.2883	94.1252	-0.0948617	-1.23845
8.746	100.771	12.2879	94.1214	-0.0947663	-1.2372
8.75433	100.852	12.2873	94.1174	-0.09467	-1.23595
8.76267	100.94	12.2868	94.1137	-0.0945722	-1.23467
8.771	101.028	12.2864	94.11	-0.0944782	-1.23344
8.77933	101.106	12.2859	94.1063	-0.094382	-1.23219
8.78767	101.195	12.2854	94.1029	-0.094289	-1.23097
8.796	101.279	12.285	94.0996	-0.0941921	-1.22971
8.80433	101.362	12.2845	94.096	-0.094098	-1.22848
8.81267	101.445	12.284	94.0922	-0.0940033	-1.22724
8.821	101.534	12.2836	94.0886	-0.0939086	-1.22601
8.82933	101.623	12.2831	94.0849	-0.0938151	-1.22478
8.83767	101.7	12.2826	94.081	-0.0937242	-1.2236
8.846	101.79	12.2821	94.0773	-0.0936299	-1.22237
8.85433	101.873	12.2816	94.0738	-0.093535	-1.22113
8.86267	101.952	12.2812	94.0701	-0.093444	-1.21994
8.871	102.036	12.2807	94.0663	-0.093352	-1.21874
8.87933	102.124	12.2802	94.0625	-0.0932621	-1.21757
8.88767	102.207	12.2797	94.0587	-0.0931715	-1.21638
8.896	102.293	12.2792	94.055	-0.093083	-1.21523
8.90433	102.377	12.2787	94.0514	-0.0929937	-1.21406
8.91267	102.461	12.2783	94.0479	-0.0929043	-1.21289
8.921	102.546	12.2778	94.0445	-0.0928126	-1.2117
8.92933	102.628	12.2774	94.0412	-0.0927254	-1.21056
8.93767	102.714	12.2769	94.0377	-0.0926375	-1.20941
8.946	102.795	12.2765	94.0342	-0.0925492	-1.20826
8.95433	102.878	12.276	94.0308	-0.0924608	-1.2071
8.96267	102.968	12.2756	94.0273	-0.0923704	-1.20592
8.971	103.052	12.2751	94.0239	-0.0922805	-1.20475
8.97933	103.133	12.2747	94.0206	-0.092192	-1.20359
8.98767	103.218	12.2742	94.0169	-0.0921085	-1.2025
8.996	103.306	12.2737	94.0132	-0.0920211	-1.20136
9.00433	103.39	12.2733	94.0097	-0.0919346	-1.20023
9.01267	103.476	12.2728	94.0061	-0.0918484	-1.19911
9.021	103.559	12.2723	94.0026	-0.0917628	-1.19799
9.02933	103.645	12.2719	93.999	-0.0916784	-1.19689
9.03767	103.728	12.2714	93.9952	-0.0915951	-1.1958
9.046	103.81	12.2709	93.9915	-0.0915114	-1.19471
9.05433	103.895	12.2704	93.988	-0.09143	-1.19365
9.06267	103.984	12.27	93.9845	-0.0913442	-1.19253
9.071	104.065	12.2696	93.9812	-0.0912572	-1.19139
9.07933	104.148	12.2691	93.9778	-0.0911737	-1.1903
9.08767	104.238	12.2687	93.9744	-0.0910888	-1.18919
9.096	104.319	12.2682	93.9708	-0.0910073	-1.18813
9.10433	104.399	12.2677	93.9673	-0.0909261	-1.18707
9.11267	104.485	12.2673	93.9638	-0.0908433	-1.18599
9.121	104.568	12.2669	93.9606	-0.0907596	-1.18489
9.12933	104.653	12.2665	93.9577	-0.0906777	-1.18382
9.13767	104.74	12.266	93.9544	-0.0905942	-1.18274
9.146	104.826	12.2656	93.951	-0.0905176	-1.18173
9.15433	104.904	12.2651	93.9474	-0.0904358	-1.18067
9.16267	104.987	12.2647	93.9441	-0.0903541	-1.1796
9.171	105.076	12.2643	93.9407	-0.0902765	-1.17859
9.17933	105.159	12.2639	93.9377	-0.0901952	-1.17753
9.18767	105.242	12.2635	93.9347	-0.090116	-1.17649
9.196	105.329	12.2631	93.9316	-0.0900361	-1.17545
9.20433	105.413	12.2626	93.9283	-0.0899581	-1.17443
9.21267	105.49	12.2622	93.9249	-0.0898809	-1.17342
9.221	105.575	12.2617	93.9215	-0.0898046	-1.17243
9.22933	105.658	12.2613	93.9183	-0.0897243	-1.17138
9.23767	105.746	12.2609	93.9154	-0.089648	-1.17038
9.246	105.831	12.2606	93.9123	-0.0895722	-1.16939
9.25433	105.916	12.2601	93.909	-0.0894961	-1.1684
9.26267	105.998	12.2597	93.9055	-0.0894204	-1.16741
9.271	106.082	12.2592	93.9023	-0.0893414	-1.16638
9.27933	106.165	12.2588	93.899	-0.0892657	-1.16539
9.28767	106.254	12.2584	93.8957	-0.0891918	-1.16443
9.296	106.335	12.2579	93.8923	-0.089115	-1.16342
9.30433	106.412	12.2575	93.8892	-0.0890389	-1.16243
9.31267	106.505	12.2571	93.8856	-0.0889626	-1.16143
9.321	106.587	12.2566	93.882	-0.0888864	-1.16044
9.32933	106.673	12.2561	93.8783	-0.0888116	-1.15946
9.33767	106.757	12.2557	93.8751	-0.0887362	-1.15848
9.346	106.841	12.2553	93.8719	-0.0886606	-1.15749
9.35433	106.922	12.2548	93.8683	-0.0885865	-1.15652
9.36267	107.005	12.2544	93.865	-0.0885126	-1.15556
9.371	107.093	12.2539	93.8617	-0.0884375	-1.15458
9.37933	107.178	12.2535	93.8584	-0.0883646	-1.15363
9.38767	107.264	12.2531	93.8551	-0.0882926	-1.15269
9.396	107.342	12.2527	93.852	-0.0882212	-1.15175
9.40433	107.427	12.2523	93.8488	-0.0881481	-1.1508
9.41267	107.51	12.2519	93.846	-0.0880763	-1.14986
9.421	107.599	12.2515	93.8429	-0.0880052	-1.14893
9.42933	107.679	12.2511	93.8398	-0.0879333	-1.148
9.43767	107.763	12.2507	93.8365	-0.0878622	-1.14707
9.446	107.848	12.2502	93.8333	-0.0877919	-1.14615
9.45433	107.936	12.2498	93.8299	-0.0877215	-1.14523
9.46267	108.023	12.2494	93.8267	-0.087652	-1.14432
9.471	108.1	12.2489	93.8233	-0.0875816	-1.1434
9.47933	108.187	12.2485	93.82	-0.087512	-1.1425
9.48767	108.271	12.2481	93.8169	-0.0874427	-1.14159
9.496	108.362	12.2477	93.8136	-0.0873726	-1.14068
9.50433	108.443	12.2472	93.8103	-0.0873024	-1.13976
9.51267	108.524	12.2468	93.8068	-0.0872334	-1.13886
9.521	108.611	12.2463	93.8034	-0.0871615	-1.13792
9.52933	108.694	12.2459	93.8	-0.0870911	-1.137
9.53767	108.778	12.2455	93.7968	-0.087022	-1.1361
9.546	108.862	12.245	93.7935	-0.0869527	-1.13519
9.55433	108.945	12.2447	93.7905	-0.0868816	-1.13427
9.56267	109.033	12.2443	93.7875	-0.0868136	-1.13338
9.571	109.112	12.2439	93.7844	-0.0867479	-1.13252
9.57933	109.196	12.2434	93.7813	-0.0866793	-1.13162
9.58767	109.281	12.243	93.7781	-0.0866138	-1.13077
9.596	109.368	12.2426	93.7751	-0.0865492	-1.12993
9.60433	109.453	12.2423	93.7723	-0.0864854	-1.12909
9.61267	109.529	12.2419	93.7695	-0.0864195	-1.12823
9.621	109.616	12.2415	93.7666	-0.0863508	-1.12733
9.62933	109.7	12.2412	93.7638	-0.0862862	-1.12649
9.63767	109.78	12.2407	93.7605	-0.0862245	-1.12569
9.646	109.868	12.2403	93.7572	-0.0861599	-1.12484
9.65433	109.95	12.2399	93.754	-0.0860935	-1.12398
9.66267	110.037	12.2394	93.7506	-0.0860299	-1.12315
9.671	110.122	12.2391	93.7477	-0.0859629	-1.12227
9.67933	110.205	12.2386	93.7444	-0.0858964	-1.1214
9.68767	110.294	12.2382	93.7413	-0.0858313	-1.12055
9.696	110.376	12.2378	93.7381	-0.0857679	-1.11973
9.70433	110.46	12.2374	93.735	-0.0857066	-1.11892
9.71267	110.546	12.237	93.7318	-0.0856426	-1.11809
9.721	110.628	12.2366	93.7285	-0.085575	-1.11721
9.72933	110.717	12.2362	93.7255	-0.0855074	-1.11633
9.73767	110.796	12.2358	93.7224	-0.0854438	-1.11549
9.746	110.882	12.2354	93.7193	-0.0853794	-1.11465
9.75433	110.963	12.235	93.7163	-0.0853175	-1.11385
9.76267	111.049	12.2346	93.7134	-0.085255	-1.11303
9.771	111.13	12.2342	93.7105	-0.0851929	-1.11222
9.77933	111.217	12.2338	93.7075	-0.0851324	-1.11143
9.78767	111.296	12.2334	93.7046	-0.085072	-1.11064
9.796	111.387	12.2331	93.7018	-0.08501	-1.10983
9.80433	111.469	12.2327	93.6988	-0.0849514	-1.10907
9.81267	111.555	12.2323	93.6959	-0.0848907	-1.10827
9.821	111.64	12.2319	93.693	-0.0848312	-1.1075
9.82933	111.721	12.2315	93.69	-0.0847743	-1.10675
9.83767	111.807	12.2312	93.6872	-0.0847139	-1.10597
9.846	111.891	12.2308	93.684	-0.0846552	-1.1052
9.85433	111.974	12.2303	93.6807	-0.0845971	-1.10444
9.86267	112.058	12.2299	93.6777	-0.0845365	-1.10365
9.871	112.143	12.2296	93.6749	-0.084474	-1.10283
9.87933	112.227	12.2292	93.672	-0.0844135	-1.10204
9.88767	112.31	12.2288	93.6694	-0.0843541	-1.10127
9.896	112.395	12.2285	93.6666	-0.0842971	-1.10052
9.90433	112.483	12.2281	93.6637	-0.0842367	-1.09974
9.91267	112.561	12.2277	93.6607	-0.0841752	-1.09893
9.921	112.651	12.2273	93.6575	-0.0841161	-1.09816
9.92933	112.735	12.2269	93.6545	-0.0840545	-1.09736
9.93767	112.817	12.2265	93.6516	-0.0839933	-1.09656
9.946	112.908	12.2262	93.6488	-0.0839333	-1.09577
9.95433	112.985	12.2257	93.6457	-0.0838761	-1.09503
9.96267	113.068	12.2253	93.6426	-0.0838198	-1.09429
9.971	113.156	12.2249	93.6395	-0.0837611	-1.09353
9.97933	113.242	12.2245	93.6364	-0.0837035	-1.09277
9.98767	113.327	12.2241	93.6334	-0.0836471	-1.09204
9.996	113.407	12.2238	93.6306	-0.0835903	-1.0913
10.0043	113.487	12.2234	93.628	-0.0835328	-1.09055
10.0127	113.573	12.2231	93.6253	-0.0834778	-1.08983
10.021	113.658	12.2227	93.6226	-0.0834245	-1.08913
10.0293	113.739	12.2224	93.6198	-0.0833692	-1.08841
10.0377	113.831	12.2221	93.6175	-0.0833157	-1.08771
10.046	113.91	12.2217	93.6146	-0.0832606	-1.08699
10.0543	113.993	12.2213	93.6117	-0.0832089	-1.08632
10.0627	114.079	12.221	93.609	-0.083156	-1.08563
10.071	114.164	12.2206	93.6064	-0.0830992	-1.08489
10.0793	114.247	12.2203	93.6036	-0.0830454	-1.08418
10.0877	114.332	12.2199	93.6006	-0.0829931	-1.0835
10.096	114.413	12.2195	93.5979	-0.0829404	-1.08281
10.1043	114.503	12.2191	93.5949	-0.082885	-1.08209
10.1127	114.584	12.2187	93.5918	-0.0828323	-1.0814
10.121	114.667	12.2183	93.5886	-0.0827764	-1.08067
10.1293	114.756	12.2179	93.5858	-0.08272	-1.07993
10.1377	114.839	12.2176	93.5832	-0.0826651	-1.07922
10.146	114.924	12.2172	93.5803	-0.082609	-1.07848
10.1543	115.002	12.2168	93.5773	-0.0825563	-1.0778
10.1627	115.092	12.2165	93.5746	-0.0825014	-1.07708
10.171	115.173	12.2161	93.5719	-0.0824461	-1.07636
10.1793	115.258	12.2158	93.5692	-0.0823909	-1.07564
10.1877	115.341	12.2154	93.5665	-0.0823391	-1.07496
10.196	115.424	12.215	93.5638	-0.082285	-1.07426
10.2043	115.51	12.2147	93.5612	-0.0822327	-1.07357
10.2127	115.593	12.2143	93.5583	-0.0821815	-1.0729
10.221	115.678	12.214	93.5553	-0.0821287	-1.07221
10.2293	115.764	12.2136	93.5525	-0.0820766	-1.07153
10.2377	115.846	12.2132	93.5498	-0.0820244	-1.07085
10.246	115.93	12.2129	93.5472	-0.0819729	-1.07018
10.2543	116.015	12.2125	93.5444	-0.081922	-1.06952
10.2627	116.101	12.2121	93.5413	-0.0818726	-1.06887
10.271	116.183	12.2117	93.5383	-0.081823	-1.06822
10.2793	116.27	12.2114	93.5357	-0.0817726	-1.06757
10.2877	116.349	12.211	93.5328	-0.0817219	-1.0669
10.296	116.434	12.2107	93.5301	-0.0816733	-1.06627
10.3043	116.521	12.2103	93.5275	-0.0816216	-1.06559
10.3127	116.603	12.2099	93.5246	-0.0815714	-1.06494
10.321	116.686	12.2096	93.522	-0.0815214	-1.06429
10.3293	116.769	12.2092	93.5193	-0.0814711	-1.06363
10.3377	116.854	12.2089	93.5164	-0.0814215	-1.06298
10.346	116.939	12.2085	93.5133	-0.0813699	-1.06231
10.3543	117.021	12.2081	93.5103	-0.0813179	-1.06163
10.3627	117.106	12.2077	93.5073	-0.0812697	-1.061
10.371	117.191	12.2073	93.5046	-0.0812196	-1.06035
10.3793	117.272	12.207	93.5017	-0.0811693	-1.05969
10.3877	117.36	12.2066	93.4989	-0.0811203	-1.05905
10.396	117.439	12.2062	93.4961	-0.0810727	-1.05843
10.4043	117.521	12.2058	93.493	-0.0810275	-1.05784
10.4127	117.609	12.2054	93.49	-0.0809821	-1.05725
10.421	117.697	12.2051	93.4873	-0.0809353	-1.05663
10.4293	117.781	12.2047	93.4848	-0.0808875	-1.05601
10.4377	117.862	12.2044	93.4822	-0.080837	-1.05535
10.446	117.946	12.2041	93.4795	-0.0807854	-1.05468
10.4543	118.032	12.2037	93.4768	-0.0807373	-1.05405
10.4627	118.116	12.2033	93.4741	-0.0806873	-1.0534
10.471	118.203	12.203	93.4715	-0.0806374	-1.05275
10.4793	118.282	12.2026	93.4686	-0.0805888	-1.05211
10.4877	118.367	12.2023	93.466	-0.0805394	-1.05147
10.496	118.454	12.2019	93.4631	-0.0804903	-1.05082
10.5043	118.534	12.2015	93.4603	-0.0804408	-1.05018
10.5127	118.622	12.2012	93.4576	-0.0803925	-1.04955
10.521	118.7	12.2008	93.4549	-0.0803468	-1.04895
10.5293	118.785	12.2005	93.452	-0.0803033	-1.04838
10.5377	118.872	12.2001	93.449	-0.0802561	-1.04777
10.546	118.958	12.1997	93.4461	-0.0802064	-1.04712
10.5543	119.042	12.1993	93.4433	-0.0801589	-1.0465
10.5627	119.125	12.199	93.4407	-0.0801082	-1.04584
10.571	119.209	12.1986	93.4378	-0.0800588	-1.04519
10.5793	119.295	12.1982	93.435	-0.0800106	-1.04456
10.5877	119.377	12.1979	93.4324	-0.0799622	-1.04393
10.596	119.457	12.1975	93.4296	-0.0799147	-1.04331
10.6043	119.541	12.1972	93.4268	-0.0798668	-1.04269
10.6127	119.634	12.1969	93.4244	-0.0798176	-1.04204
10.621	119.714	12.1966	93.4221	-0.0797719	-1.04145
10.6293	119.796	12.1962	93.4195	-0.079729	-1.04089
10.6377	119.879	12.1959	93.4172	-0.0796879	-1.04035
10.646	119.967	12.1956	93.4147	-0.0796472	-1.03982
10.6543	120.047	12.1953	93.4123	-0.0796057	-1.03928
10.6627	120.135	12.195	93.4101	-0.0795625	-1.03871
10.671	120.218	12.1946	93.4075	-0.0795195	-1.03815
10.6793	120.301	12.1943	93.4049	-0.0794768	-1.03759
10.6877	120.387	12.194	93.4025	-0.0794348	-1.03704
10.696	120.471	12.1936	93.3999	-0.079391	-1.03647
10.7043	120.55	12.1933	93.3973	-0.0793464	-1.03589
10.7127	120.641	12.193	93.3948	-0.0793068	-1.03537
10.721	120.725	12.1926	93.392	-0.0792644	-1.03482
10.7293	120.807	12.1923	93.3892	-0.0792221	-1.03427
10.7377	120.893	12.1919	93.3866	-0.0791777	-1.03369
10.746	120.978	12.1916	93.384	-0.0791338	-1.03312
10.7543	121.06	12.1913	93.3815	-0.0790923	-1.03257
10.7627	121.145	12.1909	93.3791	-0.0790501	-1.03202
10.771	121.224	12.1906	93.3764	-0.0790072	-1.03146
10.7793	121.309	12.1902	93.3737	-0.0789658	-1.03092
10.7877	121.392	12.1899	93.3711	-0.0789252	-1.03039
10.796	121.474	12.1896	93.3685	-0.0788801	-1.0298
10.8043	121.559	12.1892	93.3659	-0.0788346	-1.02921
10.8127	121.644	12.1889	93.3635	-0.0787921	-1.02865
10.821	121.736	12.1886	93.361	-0.0787514	-1.02812
10.8293	121.814	12.1882	93.3584	-0.0787118	-1.02761
10.8377	121.896	12.1879	93.356	-0.0786709	-1.02707
10.846	121.982	12.1876	93.3534	-0.0786309	-1.02655
10.8543	122.064	12.1873	93.3509	-0.0785908	-1.02603
10.8627	122.146	12.187	93.3486	-0.078551	-1.02551
10.871	122.233	12.1866	93.3461	-0.0785129	-1.02501
10.8793	122.318	12.1863	93.3436	-0.0784736	-1.0245
10.8877	122.404	12.186	93.3411	-0.078437	-1.02402
10.896	122.49	12.1856	93.3384	-0.0783982	-1.02351
10.9043	122.571	12.1853	93.3357	-0.0783571	-1.02298
10.9127	122.655	12.1849	93.3331	-0.078313	-1.0224
10.921	122.739	12.1846	93.3302	-0.0782717	-1.02186
10.9293	122.822	12.1842	93.3278	-0.0782311	-1.02133
10.9377	122.909	12.1839	93.3255	-0.078191	-1.02081
10.946	122.99	12.1836	93.3226	-0.0781498	-1.02027
10.9543	123.077	12.1832	93.32	-0.0781064	-1.0197
10.9627	123.159	12.1829	93.3176	-0.0780653	-1.01917
10.971	123.243	12.1826	93.3151	-0.078024	-1.01863
10.9793	123.327	12.1822	93.3125	-0.0779815	-1.01807
10.9877	123.407	12.1819	93.3102	-0.0779418	-1.01755
10.996	123.495	12.1816	93.3079	-0.0779047	-1.01707
11.0043	123.578	12.1813	93.3053	-0.0778668	-1.01657
11.0127	123.663	12.181	93.3029	-0.0778279	-1.01607
11.021	123.743	12.1806	93.3003	-0.0777873	-1.01554
11.0293	123.828	12.1803	93.2978	-0.0777467	-1.01501
11.0377	123.911	12.18	93.2951	-0.0777092	-1.01452
11.046	123.995	12.1797	93.2927	-0.0776708	-1.01402
11.0543	124.081	12.1793	93.2901	-0.0776296	-1.01348
11.0627	124.164	12.179	93.2876	-0.0775873	-1.01293
11.071	124.249	12.1786	93.285	-0.0775448	-1.01237
11.0793	124.339	12.1783	93.2824	-0.0775042	-1.01184
11.0877	124.42	12.178	93.2799	-0.077461	-1.01128
11.096	124.504	12.1776	93.2772	-0.0774194	-1.01073
11.1043	124.59	12.1773	93.2747	-0.0773781	-1.01019
11.1127	124.671	12.177	93.2724	-0.0773392	-1.00969
11.121	124.761	12.1767	93.2702	-0.0772975	-1.00914
11.1293	124.84	12.1764	93.2679	-0.0772591	-1.00864
11.1377	124.921	12.1761	93.2655	-0.0772217	-1.00815
11.146	125.008	12.1758	93.2631	-0.0771864	-1.00769
11.1543	125.09	12.1755	93.2608	-0.0771499	-1.00721
11.1627	125.172	12.1752	93.2584	-0.077113	-1.00673
11.171	125.26	12.1749	93.256	-0.0770772	-1.00627
11.1793	125.341	12.1746	93.2536	-0.0770404	-1.00578
11.1877	125.424	12.1742	93.2512	-0.0770041	-1.00531
11.196	125.506	12.1739	93.2487	-0.0769664	-1.00482
11.2043	125.596	12.1736	93.2463	-0.0769285	-1.00432
11.2127	125.676	12.1733	93.2438	-0.0768865	-1.00378
11.221	125.76	12.173	93.2413	-0.0768448	-1.00323
11.2293	125.847	12.1726	93.2387	-0.0768051	-1.00271
11.2377	125.931	12.1723	93.2362	-0.0767655	-1.0022
11.246	126.015	12.172	93.2337	-0.0767272	-1.0017
11.2543	126.098	12.1716	93.2312	-0.076688	-1.00118
11.2627	126.175	12.1713	93.2287	-0.0766493	-1.00068
11.271	126.261	12.171	93.2263	-0.0766126	-1.0002
11.2793	126.347	12.1707	93.2238	-0.0765743	-0.9997
11.2877	126.429	12.1704	93.2215	-0.0765377	-0.999223
11.296	126.511	12.17	93.219	-0.0765017	-0.998752
11.3043	126.596	12.1697	93.2166	-0.0764649	-0.998272
11.3127	126.679	12.1694	93.2142	-0.0764273	-0.997781
11.321	126.766	12.1691	93.2118	-0.0763897	-0.99729
11.3293	126.853	12.1688	93.2092	-0.0763512	-0.996788
11.3377	126.937	12.1685	93.2069	-0.0763152	-0.996318
11.346	127.013	12.1682	93.2045	-0.0762768	-0.995817
11.3543	127.102	12.1678	93.202	-0.0762384	-0.995316
11.3627	127.186	12.1675	93.1995	-0.0762006	-0.994821
11.371	127.267	12.1671	93.1968	-0.0761627	-0.994327
11.3793	127.353	12.1668	93.1943	-0.0761258	-0.993845
11.3877	127.436	12.1665	93.1919	-0.0760888	-0.993362
11.396	127.518	12.1662	93.1894	-0.0760526	-0.992889
11.4043	127.602	12.1659	93.1873	-0.0760176	-0.992432
11.4127	127.689	12.1656	93.1851	-0.0759796	-0.991937
11.421	127.777	12.1653	93.1827	-0.0759421	-0.991447
11.4293	127.861	12.165	93.1803	-0.0759074	-0.990994
11.4377	127.943	12.1647	93.1781	-0.0758715	-0.990525
11.446	128.022	12.1644	93.1759	-0.0758351	-0.99005
11.4543	128.108	12.1641	93.1739	-0.0757962	-0.989542
11.4627	128.19	12.1639	93.1717	-0.075758	-0.989044
11.471	128.275	12.1636	93.1695	-0.0757219	-0.988572
11.4793	128.362	12.1633	93.1675	-0.0756847	-0.988087
11.4877	128.447	12.163	93.1653	-0.0756476	-0.987602
11.496	128.532	12.1627	93.1631	-0.0756115	-0.987131
11.5043	128.611	12.1624	93.1608	-0.0755739	-0.98664
11.5127	128.694	12.1621	93.1585	-0.0755348	-0.986129
11.521	128.775	12.1618	93.1562	-0.0754977	-0.985646
11.5293	128.861	12.1616	93.1541	-0.0754614	-0.985171
11.5377	128.945	12.1613	93.1519	-0.0754279	-0.984734
11.546	129.029	12.161	93.1496	-0.0753932	-0.984281
11.5543	129.109	12.1607	93.1473	-0.075357	-0.983808
11.5627	129.197	12.1604	93.145	-0.0753204	-0.983331
11.571	129.278	12.16	93.1423	-0.075286	-0.982881
11.5793	129.358	12.1597	93.1397	-0.0752512	-0.982427
11.5877	129.447	12.1594	93.1372	-0.0752164	-0.981973
11.596	129.533	12.1591	93.1352	-0.0751816	-0.981518
11.6043	129.615	12.1588	93.1329	-0.0751446	-0.981035
11.6127	129.696	12.1585	93.1302	-0.0751102	-0.980586
11.621	129.782	12.1581	93.1277	-0.075073	-0.9801
11.6293	129.869	12.1578	93.1253	-0.0750369	-0.979629
11.6377	129.952	12.1575	93.123	-0.0750009	-0.979159
11.646	130.034	12.1572	93.1207	-0.0749668	-0.978714
11.6543	130.118	12.1569	93.1186	-0.0749309	-0.978245
11.6627	130.206	12.1567	93.1168	-0.0748957	-0.977785
11.671	130.286	12.1564	93.1148	-0.0748601	-0.977321
11.6793	130.368	12.1561	93.1125	-0.0748243	-0.976854
11.6877	130.453	12.1558	93.1103	-0.074791	-0.976419
11.696	130.537	12.1556	93.1083	-0.0747554	-0.975954
11.7043	130.623	12.1553	93.106	-0.0747212	-0.975508
11.7127	130.707	12.155	93.104	-0.0746879	-0.975073
11.721	130.796	12.1547	93.1018	-0.0746532	-0.97462
11.7293	130.879	12.1544	93.0994	-0.0746162	-0.974137
11.7377	130.956	12.1541	93.0971	-0.0745802	-0.973667
11.746	131.041	12.1538	93.0948	-0.0745458	-0.973217
11.7543	131.126	12.1535	93.0923	-0.0745102	-0.972753
11.7627	131.202	12.1532	93.0901	-0.074475	-0.972294
11.771	131.298	12.1529	93.0879	-0.0744387	-0.971819
11.7793	131.377	12.1526	93.0857	-0.0744019	-0.97134
11.7877	131.46	12.1524	93.0835	-0.0743644	-0.970849
11.796	131.547	12.1521	93.0813	-0.0743269	-0.970361
11.8043	131.626	12.1518	93.079	-0.0742926	-0.969912
11.8127	131.71	12.1515	93.077	-0.0742612	-0.969503
11.821	131.794	12.1512	93.075	-0.0742233	-0.969008
11.8293	131.881	12.1509	93.0727	-0.0741843	-0.968499
11.8377	131.965	12.1507	93.0707	-0.0741511	-0.968064
11.846	132.046	12.1504	93.0686	-0.0741191	-0.967647
11.8543	132.13	12.1501	93.0662	-0.0740848	-0.967199
11.8627	132.216	12.1498	93.064	-0.0740506	-0.966753
11.871	132.302	12.1495	93.062	-0.0740189	-0.966338
11.8793	132.383	12.1492	93.0597	-0.0739844	-0.965889
11.8877	132.468	12.1489	93.0575	-0.0739497	-0.965436
11.896	132.548	12.1487	93.0555	-0.0739108	-0.964928
11.9043	132.634	12.1484	93.0533	-0.0738786	-0.964507
11.9127	132.72	12.1481	93.0513	-0.0738467	-0.96409
11.921	132.799	12.1478	93.049	-0.0738117	-0.963634
11.9293	132.882	12.1476	93.047	-0.0737747	-0.96315
11.9377	132.971	12.1473	93.045	-0.0737396	-0.962692
11.946	133.052	12.1471	93.043	-0.0737034	-0.96222
11.9543	133.138	12.1468	93.0409	-0.0736668	-0.961742
11.9627	133.22	12.1465	93.0389	-0.0736321	-0.96129
11.971	133.301	12.1463	93.0369	-0.0735972	-0.960834
11.9793	133.388	12.146	93.0346	-0.0735649	-0.960412
11.9877	133.475	12.1457	93.0323	-0.0735305	-0.959963
11.996	133.556	12.1454	93.03	-0.0734958	-0.95951
12.0043	133.64	12.1451	93.0277	-0.0734611	-0.959056
12.0127	133.722	12.1448	93.0254	-0.0734277	-0.95862
12.021	133.811	12.1445	93.0234	-0.0733958	-0.958204
12.0293	133.893	12.1442	93.0211	-0.0733648	-0.9578
12.0377	133.978	12.1439	93.0188	-0.0733319	-0.95737
12.046	134.059	12.1436	93.0164	-0.0732989	-0.956939
12.0543	134.143	12.1433	93.014	-0.0732644	-0.956489
12.0627	134.227	12.143	93.0118	-0.0732299	-0.956039
12.071	134.307	12.1427	93.0096	-0.0731964	-0.955601
12.0793	134.393	12.1424	93.0074	-0.0731618	-0.95515
12.0877	134.481	12.1421	93.0053	-0.0731272	-0.954698
12.096	134.562	12.1419	93.0032	-0.073092	-0.954237
12.1043	134.645	12.1415	93.0007	-0.0730563	-0.953771
12.1127	134.731	12.1413	92.9986	-0.0730206	-0.953306
12.121	134.815	12.141	92.9966	-0.0729873	-0.952871
12.1293	134.898	12.1407	92.9945	-0.0729536	-0.952432
12.1377	134.983	12.1405	92.9927	-0.0729192	-0.951982
12.146	135.065	12.1402	92.9906	-0.0728856	-0.951543
12.1543	135.145	12.14	92.9887	-0.0728507	-0.951087
12.1627	135.234	12.1397	92.9868	-0.0728175	-0.950654
12.171	135.313	12.1395	92.985	-0.0727848	-0.950228
12.1793	135.4	12.1392	92.983	-0.0727517	-0.949796
12.1877	135.49	12.139	92.9813	-0.0727189	-0.949368
12.196	135.57	12.1387	92.9791	-0.0726878	-0.948961
12.2043	135.655	12.1384	92.9766	-0.072653	-0.948506
12.2127	135.737	12.1381	92.9746	-0.0726195	-0.94807
12.221	135.822	12.1378	92.9724	-0.0725873	-0.947648
12.2293	135.901	12.1376	92.9704	-0.0725533	-0.947206
12.2377	135.989	12.1373	92.9682	-0.0725207	-0.946779
12.246	136.074	12.137	92.966	-0.0724866	-0.946335
12.2543	136.157	12.1367	92.9636	-0.0724534	-0.945901
12.2627	136.242	12.1364	92.9614	-0.0724198	-0.945462
12.271	136.325	12.1362	92.9594	-0.0723847	-0.945004
12.2793	136.41	12.1359	92.9577	-0.0723508	-0.944561
12.2877	136.495	12.1357	92.9557	-0.0723193	-0.944151
12.296	136.58	12.1354	92.9536	-0.0722877	-0.943737
12.3043	136.659	12.1351	92.9515	-0.0722563	-0.943328
12.3127	136.745	12.1349	92.9495	-0.0722269	-0.942943
12.321	136.83	12.1346	92.9475	-0.0721949	-0.942526
12.3293	136.909	12.1343	92.9456	-0.0721655	-0.942143
12.3377	136.997	12.1341	92.9438	-0.0721328	-0.941715
12.346	137.081	12.1339	92.942	-0.0721029	-0.941326
12.3543	137.162	12.1336	92.94	-0.0720731	-0.940935
12.3627	137.244	12.1333	92.9379	-0.0720411	-0.940519
12.371	137.328	12.1331	92.9359	-0.0720092	-0.940102
12.3793	137.415	12.1328	92.9335	-0.0719752	-0.939658
12.3877	137.5	12.1325	92.9315	-0.0719415	-0.939218
12.396	137.584	12.1322	92.9294	-0.0719066	-0.938763
12.4043	137.667	12.1319	92.9273	-0.0718748	-0.938346
12.4127	137.751	12.1317	92.9252	-0.071841	-0.937906
12.421	137.832	12.1314	92.9233	-0.0718106	-0.937509
12.4293	137.914	12.1312	92.9212	-0.0717778	-0.937081
12.4377	137.999	12.1309	92.9189	-0.0717459	-0.936664
12.446	138.078	12.1306	92.9169	-0.0717142	-0.93625
12.4543	138.166	12.1304	92.9151	-0.071682	-0.935831
12.4627	138.252	12.1301	92.9134	-0.0716514	-0.93543
12.471	138.34	12.1299	92.9115	-0.0716219	-0.935045
12.4793	138.425	12.1297	92.9097	-0.0715944	-0.934686
12.4877	138.505	12.1294	92.9079	-0.0715651	-0.934303
12.496	138.587	12.1292	92.906	-0.071535	-0.933911
12.5043	138.671	12.1289	92.9039	-0.0715014	-0.933472
12.5127	138.754	12.1286	92.9017	-0.071471	-0.933076
12.521	138.84	12.1284	92.8999	-0.0714386	-0.932652
12.5293	138.925	12.1281	92.8978	-0.0714054	-0.932219
12.5377	139.01	12.1278	92.8958	-0.0713731	-0.931798
12.546	139.089	12.1276	92.894	-0.0713408	-0.931375
12.5543	139.175	12.1273	92.892	-0.071307	-0.930934
12.5627	139.258	12.1271	92.8899	-0.0712726	-0.930485
12.571	139.341	12.1268	92.8878	-0.0712392	-0.93005
12.5793	139.425	12.1265	92.8857	-0.071206	-0.929616
12.5877	139.51	12.1263	92.8838	-0.0711766	-0.929232
12.596	139.595	12.126	92.8819	-0.0711437	-0.928802
12.6043	139.68	12.1258	92.8799	-0.0711119	-0.928388
12.6127	139.763	12.1255	92.8781	-0.0710821	-0.927998
12.621	139.844	12.1253	92.8762	-0.0710514	-0.927597
12.6293	139.931	12.125	92.8742	-0.0710216	-0.927208
12.6377	140.014	12.1248	92.8722	-0.0709909	-0.926808
12.646	140.096	12.1245	92.8699	-0.0709602	-0.926407
12.6543	140.181	12.1242	92.8679	-0.070932	-0.926039
12.6627	140.269	12.1239	92.8659	-0.0709037	-0.925669
12.671	140.35	12.1237	92.8641	-0.070871	-0.925243
12.6793	140.434	12.1235	92.8622	-0.0708397	-0.924833
12.6877	140.517	12.1232	92.8602	-0.0708104	-0.924451
12.696	140.605	12.1229	92.8582	-0.0707823	-0.924084
12.7043	140.687	12.1227	92.8561	-0.0707522	-0.923691
12.7127	140.769	12.1224	92.8542	-0.0707224	-0.923303
12.721	140.856	12.1222	92.8525	-0.0706946	-0.922939
12.7293	140.939	12.122	92.851	-0.070665	-0.922553
12.7377	141.023	12.1218	92.8493	-0.0706345	-0.922155
12.746	141.104	12.1215	92.8475	-0.0706044	-0.921761
12.7543	141.186	12.1213	92.8454	-0.0705746	-0.921373
12.7627	141.272	12.121	92.8435	-0.0705456	-0.920994
12.771	141.356	12.1208	92.8418	-0.0705156	-0.920602
12.7793	141.439	12.1205	92.8397	-0.0704863	-0.92022
12.7877	141.521	12.1203	92.8379	-0.0704585	-0.919857
12.796	141.608	12.1201	92.8363	-0.0704288	-0.91947
12.8043	141.694	12.1198	92.8342	-0.0703981	-0.919069
12.8127	141.772	12.1195	92.832	-0.0703696	-0.918696
12.821	141.857	12.1192	92.83	-0.0703402	-0.918312
12.8293	141.939	12.119	92.8278	-0.0703114	-0.917937
12.8377	142.022	12.1187	92.8256	-0.0702844	-0.917585
12.846	142.105	12.1184	92.8236	-0.0702565	-0.917219
12.8543	142.189	12.1182	92.8218	-0.0702291	-0.916862
12.8627	142.277	12.118	92.8202	-0.0701986	-0.916464
12.871	142.36	12.1177	92.8183	-0.0701687	-0.916073
12.8793	142.444	12.1174	92.816	-0.0701413	-0.915716
12.8877	142.525	12.1172	92.8141	-0.0701127	-0.915343
12.896	142.613	12.1169	92.8122	-0.0700838	-0.914965
12.9043	142.694	12.1167	92.8104	-0.0700544	-0.914581
12.9127	142.777	12.1165	92.8087	-0.0700256	-0.914205
12.921	142.862	12.1162	92.8069	-0.0699977	-0.913841
12.9293	142.944	12.116	92.8049	-0.0699693	-0.91347
12.9377	143.03	12.1157	92.8028	-0.0699399	-0.913086
12.946	143.118	12.1154	92.8006	-0.0699116	-0.912717
12.9543	143.201	12.1152	92.7986	-0.0698836	-0.912351
12.9627	143.28	12.1149	92.7968	-0.0698516	-0.911934
12.971	143.367	12.1147	92.7949	-0.0698229	-0.911559
12.9793	143.445	12.1144	92.7931	-0.0697929	-0.911167
12.9877	143.535	12.1142	92.7911	-0.0697628	-0.910774
12.996	143.617	12.1139	92.7891	-0.0697333	-0.91039
13.0043	143.701	12.1137	92.7873	-0.0697034	-0.909999
13.0127	143.782	12.1135	92.7855	-0.0696761	-0.909643
13.021	143.87	12.1132	92.7839	-0.0696484	-0.909281
13.0293	143.951	12.113	92.7823	-0.0696187	-0.908892
13.0377	144.04	12.1128	92.7806	-0.0695904	-0.908523
13.046	144.123	12.1126	92.7788	-0.0695641	-0.90818
13.0543	144.203	12.1123	92.777	-0.0695342	-0.90779
13.0627	144.295	12.1121	92.7753	-0.0695079	-0.907447
13.071	144.373	12.1119	92.7735	-0.0694807	-0.907091
13.0793	144.462	12.1117	92.7718	-0.0694529	-0.906729
13.0877	144.542	12.1114	92.7699	-0.0694237	-0.906347
13.096	144.623	12.1111	92.7679	-0.0693929	-0.905945
13.1043	144.707	12.1109	92.7659	-0.0693628	-0.905553
13.1127	144.791	12.1106	92.7639	-0.0693348	-0.905187
13.121	144.875	12.1104	92.762	-0.0693087	-0.904846
13.1293	144.958	12.1102	92.7603	-0.0692814	-0.904489
13.1377	145.044	12.1099	92.7587	-0.0692552	-0.904147
13.146	145.126	12.1097	92.757	-0.0692259	-0.903765
13.1543	145.206	12.1094	92.7548	-0.0691982	-0.903404
13.1627	145.297	12.1092	92.7529	-0.0691693	-0.903026
13.171	145.373	12.109	92.7513	-0.0691441	-0.902697
13.1793	145.459	12.1088	92.7497	-0.0691196	-0.902377
13.1877	145.544	12.1085	92.7479	-0.0690939	-0.902042
13.196	145.627	12.1083	92.7463	-0.0690675	-0.901697
13.2043	145.708	12.1081	92.7446	-0.0690379	-0.901311
13.2127	145.793	12.1078	92.7426	-0.0690091	-0.900935
13.221	145.875	12.1076	92.7405	-0.0689826	-0.900589
13.2293	145.958	12.1073	92.7387	-0.0689565	-0.900248
13.2377	146.045	12.1071	92.7369	-0.0689279	-0.899874
13.246	146.128	12.1069	92.7351	-0.0689024	-0.899542
13.2543	146.211	12.1066	92.7331	-0.0688755	-0.899191
13.2627	146.295	12.1064	92.7312	-0.0688467	-0.898814
13.271	146.38	12.1061	92.7296	-0.0688177	-0.898436
13.2793	146.462	12.1059	92.7279	-0.0687881	-0.898049
13.2877	146.543	12.1057	92.7263	-0.0687615	-0.897702
13.296	146.628	12.1055	92.7246	-0.0687365	-0.897375
13.3043	146.715	12.1053	92.7228	-0.0687093	-0.89702
13.3127	146.799	12.105	92.721	-0.0686825	-0.896671
13.321	146.884	12.1048	92.7194	-0.0686566	-0.896332
13.3293	146.965	12.1046	92.7178	-0.0686283	-0.895963
13.3377	147.046	12.1044	92.7161	-0.0685998	-0.895591
13.346	147.129	12.1042	92.7145	-0.0685728	-0.895238
13.3543	147.213	12.1039	92.7126	-0.0685456	-0.894883
13.3627	147.299	12.1037	92.7108	-0.0685193	-0.894539
13.371	147.385	12.1035	92.7089	-0.0684904	-0.894163
13.3793	147.468	12.1032	92.7073	-0.0684618	-0.893789
13.3877	147.55	12.103	92.7058	-0.0684334	-0.893418
13.396	147.631	12.1029	92.7044	-0.0684051	-0.893049
13.4043	147.717	12.1026	92.7025	-0.0683768	-0.89268
13.4127	147.799	12.1024	92.7011	-0.0683493	-0.892321
13.421	147.885	12.1022	92.6994	-0.0683226	-0.891972
13.4293	147.965	12.1019	92.6974	-0.0682954	-0.891617
13.4377	148.052	12.1017	92.6958	-0.0682705	-0.891292
13.446	148.14	12.1015	92.694	-0.0682446	-0.890953
13.4543	148.217	12.1013	92.6923	-0.0682166	-0.890588
13.4627	148.301	12.101	92.6905	-0.0681881	-0.890216
13.471	148.391	12.1008	92.6889	-0.0681606	-0.889857
13.4793	148.47	12.1006	92.687	-0.0681338	-0.889507
13.4877	148.553	12.1004	92.6855	-0.0681098	-0.889194
13.496	148.639	12.1002	92.6837	-0.0680841	-0.888859
13.5043	148.725	12.0999	92.6821	-0.0680549	-0.888477
13.5127	148.809	12.0998	92.6807	-0.0680285	-0.888133
13.521	148.89	12.0996	92.6791	-0.0680002	-0.887762
13.5293	148.972	12.0993	92.6774	-0.0679751	-0.887435
13.5377	149.057	12.0991	92.6756	-0.0679514	-0.887125
13.546	149.142	12.0989	92.6739	-0.0679264	-0.8868
13.5543	149.22	12.0986	92.6719	-0.0679015	-0.886475
13.5627	149.302	12.0984	92.6703	-0.067876	-0.886142
13.571	149.387	12.0982	92.6686	-0.0678483	-0.88578
13.5793	149.475	12.098	92.6669	-0.0678204	-0.885416
13.5877	149.558	12.0977	92.6651	-0.0677958	-0.885095
13.596	149.643	12.0975	92.6634	-0.0677688	-0.884743
13.6043	149.728	12.0973	92.6615	-0.0677442	-0.884421
13.6127	149.814	12.097	92.6599	-0.0677153	-0.884044
13.621	149.893	12.0969	92.6585	-0.0676856	-0.883656
13.6293	149.978	12.0967	92.6571	-0.0676591	-0.883309
13.6377	150.064	12.0965	92.6554	-0.0676317	-0.882952
13.646	150.145	12.0962	92.6537	-0.067603	-0.882577
13.6543	150.232	12.096	92.6521	-0.0675765	-0.882232
13.6627	150.315	12.0958	92.6501	-0.0675525	-0.881918
13.671	150.397	12.0956	92.6486	-0.0675272	-0.881588
13.6793	150.482	12.0953	92.6468	-0.0675002	-0.881236
13.6877	150.569	12.0951	92.6452	-0.067473	-0.88088
13.696	150.65	12.0949	92.6435	-0.0674495	-0.880574
13.7043	150.733	12.0947	92.6416	-0.0674253	-0.880258
13.7127	150.82	12.0944	92.6398	-0.0673978	-0.879898
13.721	150.901	12.0942	92.6381	-0.0673719	-0.879561
13.7293	150.984	12.094	92.6363	-0.0673471	-0.879237
13.7377	151.065	12.0937	92.6344	-0.067322	-0.878909
13.746	151.152	12.0935	92.6326	-0.0672944	-0.878549
13.7543	151.23	12.0932	92.6307	-0.0672691	-0.878219
13.7627	151.317	12.093	92.6291	-0.0672451	-0.877905
13.771	151.4	12.0928	92.6276	-0.0672195	-0.877571
13.7793	151.487	12.0926	92.626	-0.0671921	-0.877213
13.7877	151.563	12.0924	92.6245	-0.0671659	-0.876871
13.796	151.65	12.0922	92.6228	-0.0671422	-0.876562
13.8043	151.737	12.092	92.6212	-0.0671167	-0.876228
13.8127	151.822	12.0918	92.6196	-0.0670894	-0.875872
13.821	151.904	12.0916	92.6182	-0.0670627	-0.875524
13.8293	151.989	12.0914	92.6169	-0.067038	-0.875201
13.8377	152.072	12.0913	92.6157	-0.0670082	-0.874812
13.846	152.155	12.0911	92.6141	-0.0669826	-0.874478
13.8543	152.243	12.0909	92.6125	-0.0669581	-0.874158
13.8627	152.322	12.0906	92.6108	-0.0669319	-0.873816
13.871	152.401	12.0904	92.6089	-0.0669069	-0.873489
13.8793	152.491	12.0902	92.6072	-0.0668805	-0.873145
13.8877	152.572	12.09	92.6056	-0.0668547	-0.872808
13.896	152.657	12.0898	92.604	-0.0668316	-0.872507
13.9043	152.74	12.0895	92.6022	-0.0668074	-0.872191
13.9127	152.824	12.0893	92.6006	-0.0667832	-0.871875
13.921	152.911	12.0891	92.599	-0.0667633	-0.871615
13.9293	152.994	12.0889	92.5973	-0.0667375	-0.871278
13.9377	153.078	12.0886	92.5954	-0.0667098	-0.870917
13.946	153.16	12.0884	92.5936	-0.0666869	-0.870618
13.9543	153.248	12.0882	92.592	-0.0666638	-0.870316
13.9627	153.33	12.088	92.5903	-0.0666382	-0.869982
13.971	153.418	12.0877	92.5885	-0.0666145	-0.869672
13.9793	153.494	12.0875	92.5865	-0.0665913	-0.86937
13.9877	153.581	12.0873	92.5849	-0.0665667	-0.869048
13.996	153.661	12.087	92.5833	-0.0665396	-0.868695
14.0043	153.748	12.0868	92.5813	-0.0665134	-0.868352
14.0127	153.83	12.0866	92.5795	-0.066487	-0.868007
14.021	153.911	12.0863	92.5777	-0.066463	-0.867694
14.0293	154	12.0861	92.5762	-0.066438	-0.867368
14.0377	154.084	12.0859	92.5748	-0.066413	-0.867042
14.046	154.167	12.0857	92.5733	-0.0663892	-0.86673
14.0543	154.252	12.0855	92.5718	-0.0663632	-0.866392
14.0627	154.334	12.0854	92.5705	-0.0663363	-0.86604
14.071	154.423	12.0852	92.5689	-0.0663119	-0.865721
14.0793	154.506	12.085	92.5673	-0.0662879	-0.865408
14.0877	154.589	12.0847	92.5657	-0.0662599	-0.865043
14.096	154.672	12.0845	92.5641	-0.0662366	-0.864739
14.1043	154.754	12.0843	92.5624	-0.0662118	-0.864415
14.1127	154.837	12.0841	92.5607	-0.0661859	-0.864077
14.121	154.92	12.0839	92.5591	-0.0661595	-0.863732
14.1293	154.999	12.0837	92.5575	-0.0661349	-0.863411
14.1377	155.088	12.0835	92.556	-0.0661123	-0.863116
14.146	155.169	12.0833	92.5544	-0.0660874	-0.862791
14.1543	155.255	12.0831	92.5527	-0.0660625	-0.862466
14.1627	155.331	12.0828	92.5511	-0.0660396	-0.862167
14.171	155.419	12.0826	92.5494	-0.0660183	-0.861888
14.1793	155.508	12.0824	92.548	-0.0659916	-0.86154
14.1877	155.59	12.0823	92.5467	-0.0659664	-0.861211
14.196	155.67	12.0821	92.5453	-0.06594	-0.860866
14.2043	155.754	12.0819	92.5437	-0.065915	-0.86054
14.2127	155.841	12.0817	92.5422	-0.065891	-0.860227
14.221	155.922	12.0815	92.5404	-0.0658655	-0.859894
14.2293	156.009	12.0812	92.5386	-0.0658402	-0.859564
14.2377	156.091	12.081	92.5371	-0.0658135	-0.859216
14.246	156.173	12.0808	92.5355	-0.0657849	-0.858841
14.2543	156.254	12.0806	92.5341	-0.0657594	-0.858508
14.2627	156.339	12.0804	92.5326	-0.0657365	-0.858209
14.271	156.429	12.0802	92.5312	-0.0657119	-0.857888
14.2793	156.508	12.08	92.5297	-0.0656885	-0.857583
14.2877	156.594	12.0798	92.5281	-0.0656644	-0.857269
14.296	156.675	12.0797	92.5267	-0.0656404	-0.856955
14.3043	156.763	12.0795	92.5253	-0.0656167	-0.856646
14.3127	156.84	12.0793	92.524	-0.0655958	-0.856373
14.321	156.929	12.0791	92.5226	-0.065575	-0.856101
14.3293	157.011	12.0789	92.5212	-0.0655547	-0.855836
14.3377	157.099	12.0788	92.52	-0.0655306	-0.855521
14.346	157.179	12.0786	92.5183	-0.0655057	-0.855197
14.3543	157.263	12.0783	92.5166	-0.0654832	-0.854902
14.3627	157.344	12.0781	92.515	-0.0654601	-0.854601
14.371	157.434	12.0779	92.5136	-0.0654382	-0.854315
14.3793	157.515	12.0777	92.5117	-0.0654128	-0.853984
14.3877	157.595	12.0775	92.5102	-0.0653871	-0.853649
14.396	157.681	12.0773	92.5085	-0.065361	-0.853307
14.4043	157.762	12.077	92.5067	-0.065334	-0.852955
14.4127	157.846	12.0768	92.505	-0.0653091	-0.85263
14.421	157.931	12.0766	92.5033	-0.0652857	-0.852325
14.4293	158.015	12.0764	92.5017	-0.065264	-0.852041
14.4377	158.1	12.0762	92.4998	-0.0652401	-0.851729
14.446	158.181	12.0759	92.4981	-0.0652163	-0.851418
14.4543	158.264	12.0757	92.4964	-0.0651928	-0.851111
14.4627	158.349	12.0755	92.4949	-0.0651708	-0.850824
14.471	158.434	12.0753	92.4932	-0.0651493	-0.850543
14.4793	158.514	12.0751	92.4917	-0.0651237	-0.85021
14.4877	158.601	12.0749	92.4903	-0.0651015	-0.84992
14.496	158.684	12.0747	92.4887	-0.0650778	-0.84961
14.5043	158.773	12.0745	92.4872	-0.0650535	-0.849293
14.5127	158.855	12.0743	92.4858	-0.0650287	-0.848969
14.521	158.936	12.0741	92.4845	-0.0650067	-0.848682
14.5293	159.019	12.074	92.4831	-0.0649843	-0.84839
14.5377	159.103	12.0738	92.4815	-0.0649596	-0.848066
14.546	159.19	12.0736	92.48	-0.0649324	-0.847712
14.5543	159.275	12.0734	92.4786	-0.0649064	-0.847372
14.5627	159.354	12.0732	92.4773	-0.0648841	-0.847082
14.571	159.442	12.073	92.4759	-0.0648583	-0.846745
14.5793	159.526	12.0728	92.4744	-0.0648325	-0.846408
14.5877	159.606	12.0726	92.4726	-0.0648083	-0.846092
14.596	159.69	12.0724	92.471	-0.0647845	-0.845781
14.6043	159.78	12.0722	92.4694	-0.0647595	-0.845455
14.6127	159.859	12.072	92.4682	-0.0647335	-0.845116
14.621	159.945	12.0718	92.4667	-0.0647099	-0.844807
14.6293	160.027	12.0716	92.4652	-0.0646878	-0.844518
14.6377	160.11	12.0714	92.4635	-0.0646651	-0.844222
14.646	160.193	12.0712	92.4618	-0.0646419	-0.843919
14.6543	160.282	12.071	92.4601	-0.0646192	-0.843623
14.6627	160.359	12.0707	92.4584	-0.0645985	-0.843353
14.671	160.444	12.0706	92.457	-0.0645786	-0.843093
14.6793	160.531	12.0704	92.4556	-0.0645563	-0.842802
14.6877	160.614	12.0702	92.4541	-0.0645327	-0.842494
14.696	160.7	12.07	92.4525	-0.0645109	-0.842209
14.7043	160.783	12.0698	92.4511	-0.0644886	-0.841918
14.7127	160.865	12.0696	92.4497	-0.0644681	-0.841651
14.721	160.952	12.0694	92.4484	-0.0644483	-0.841392
14.7293	161.034	12.0692	92.4467	-0.064428	-0.841127
14.7377	161.113	12.069	92.4451	-0.0644096	-0.840887
14.746	161.197	12.0688	92.4434	-0.0643871	-0.840593
14.7543	161.286	12.0686	92.4418	-0.0643636	-0.840286
14.7627	161.369	12.0684	92.4403	-0.0643395	-0.839972
14.771	161.449	12.0681	92.4386	-0.0643173	-0.839682
14.7793	161.535	12.0679	92.4369	-0.064295	-0.83939
14.7877	161.622	12.0677	92.4351	-0.0642719	-0.839089
14.796	161.706	12.0675	92.4334	-0.0642491	-0.838791
14.8043	161.787	12.0673	92.4317	-0.0642281	-0.838517
14.8127	161.872	12.0671	92.4304	-0.0642062	-0.838231
14.821	161.954	12.0669	92.4291	-0.06418	-0.837889
14.8293	162.039	12.0668	92.4282	-0.0641565	-0.837582
14.8377	162.121	12.0666	92.4271	-0.0641334	-0.837281
14.846	162.201	12.0665	92.4256	-0.064116	-0.837054
14.8543	162.287	12.0663	92.4242	-0.0640963	-0.836797
14.8627	162.372	12.0661	92.4227	-0.0640748	-0.836516
14.871	162.456	12.0659	92.4213	-0.0640528	-0.836229
14.8793	162.536	12.0657	92.42	-0.0640316	-0.835952
14.8877	162.622	12.0656	92.4187	-0.0640088	-0.835654
14.896	162.708	12.0654	92.4175	-0.0639854	-0.835349
14.9043	162.791	12.0652	92.416	-0.0639655	-0.835089
14.9127	162.873	12.0649	92.4141	-0.0639458	-0.834831
14.921	162.957	12.0647	92.4123	-0.0639255	-0.834566
14.9293	163.04	12.0645	92.4107	-0.0639016	-0.834254
14.9377	163.13	12.0643	92.4094	-0.0638797	-0.833969
14.946	163.212	12.0642	92.4083	-0.0638579	-0.833684
14.9543	163.292	12.0641	92.4072	-0.0638372	-0.833414
14.9627	163.38	12.0639	92.4058	-0.0638162	-0.83314
14.971	163.461	12.0637	92.4046	-0.0637946	-0.832857
14.9793	163.542	12.0635	92.4031	-0.0637729	-0.832574
14.9877	163.626	12.0633	92.4017	-0.0637519	-0.832301
14.996	163.713	12.0632	92.4005	-0.0637302	-0.832017
15.0043	163.792	12.063	92.3992	-0.0637086	-0.831735
15.0127	163.878	12.0628	92.3979	-0.0636874	-0.831458
15.021	163.959	12.0626	92.3964	-0.0636657	-0.831175
15.0293	164.04	12.0624	92.3946	-0.0636455	-0.830912
15.0377	164.128	12.0622	92.3929	-0.0636221	-0.830606
15.046	164.212	12.062	92.3915	-0.0636001	-0.830319
15.0543	164.296	12.0618	92.3898	-0.0635751	-0.829993
15.0627	164.378	12.0616	92.3882	-0.0635514	-0.829682
15.071	164.46	12.0614	92.3868	-0.0635288	-0.829388
15.0793	164.547	12.0612	92.3853	-0.0635072	-0.829106
15.0877	164.628	12.061	92.3839	-0.0634855	-0.828822
15.096	164.712	12.0608	92.3824	-0.0634648	-0.828552
15.1043	164.795	12.0606	92.381	-0.063442	-0.828254
15.1127	164.879	12.0604	92.3796	-0.0634198	-0.827965
15.121	164.963	12.0603	92.3783	-0.0634006	-0.827713
15.1293	165.045	12.0601	92.3767	-0.063378	-0.827419
15.1377	165.132	12.0599	92.3752	-0.0633586	-0.827165
15.146	165.217	12.0597	92.3739	-0.063341	-0.826936
15.1543	165.299	12.0595	92.3724	-0.0633211	-0.826676
15.1627	165.385	12.0593	92.3708	-0.0633003	-0.826404
15.171	165.47	12.0591	92.3695	-0.0632767	-0.826097
15.1793	165.548	12.0589	92.3681	-0.0632538	-0.825797
15.1877	165.636	12.0588	92.3666	-0.063232	-0.825513
15.196	165.716	12.0586	92.365	-0.0632096	-0.82522
15.2043	165.801	12.0583	92.3634	-0.0631877	-0.824935
15.2127	165.883	12.0582	92.362	-0.0631676	-0.824672
15.221	165.967	12.058	92.3607	-0.0631461	-0.824392
15.2293	166.054	12.0578	92.3592	-0.0631245	-0.824109
15.2377	166.137	12.0576	92.3578	-0.0631005	-0.823797
15.246	166.222	12.0574	92.3563	-0.0630774	-0.823494
15.2543	166.304	12.0572	92.3547	-0.0630578	-0.823238
15.2627	166.386	12.057	92.3535	-0.0630366	-0.822962
15.271	166.468	12.0569	92.3522	-0.0630173	-0.822709
15.2793	166.554	12.0567	92.351	-0.0629973	-0.822448
15.2877	166.638	12.0566	92.3499	-0.0629753	-0.822162
15.296	166.717	12.0564	92.3486	-0.0629521	-0.821858
15.3043	166.807	12.0562	92.347	-0.0629291	-0.821558
15.3127	166.892	12.056	92.3453	-0.0629052	-0.821246
15.321	166.976	12.0558	92.344	-0.0628841	-0.820971
15.3293	167.053	12.0556	92.3427	-0.0628627	-0.820692
15.3377	167.139	12.0555	92.3413	-0.062841	-0.820408
15.346	167.223	12.0553	92.3399	-0.0628197	-0.82013
15.3543	167.309	12.0551	92.3386	-0.0627959	-0.81982
15.3627	167.385	12.0549	92.3371	-0.0627744	-0.819538
15.371	167.472	12.0547	92.3355	-0.0627545	-0.819279
15.3793	167.557	12.0545	92.3342	-0.0627334	-0.819003
15.3877	167.639	12.0544	92.3329	-0.062712	-0.818724
15.396	167.724	12.0542	92.3319	-0.0626911	-0.818451
15.4043	167.804	12.0541	92.3306	-0.0626714	-0.818193
15.4127	167.889	12.0539	92.3291	-0.0626512	-0.81793
15.421	167.975	12.0537	92.3278	-0.062632	-0.81768
15.4293	168.058	12.0535	92.3263	-0.0626126	-0.817427
15.4377	168.142	12.0533	92.3247	-0.0625934	-0.817176
15.446	168.227	12.0531	92.3232	-0.0625716	-0.816892
15.4543	168.31	12.0529	92.3218	-0.0625507	-0.816619
15.4627	168.391	12.0527	92.3204	-0.0625302	-0.81635
15.471	168.476	12.0526	92.3191	-0.0625093	-0.816078
15.4793	168.56	12.0524	92.3178	-0.0624894	-0.815818
15.4877	168.646	12.0522	92.3165	-0.0624675	-0.815533
15.496	168.73	12.052	92.3152	-0.0624475	-0.815271
15.5043	168.814	12.0518	92.3136	-0.0624248	-0.814975
15.5127	168.898	12.0516	92.3121	-0.0624025	-0.814683
15.521	168.98	12.0515	92.3107	-0.062379	-0.814376
15.5293	169.066	12.0513	92.3093	-0.062359	-0.814115
15.5377	169.149	12.0511	92.3081	-0.0623376	-0.813836
15.546	169.236	12.051	92.3069	-0.0623163	-0.813557
15.5543	169.315	12.0508	92.3057	-0.0622987	-0.813329
15.5627	169.404	12.0506	92.3044	-0.0622774	-0.81305
15.571	169.482	12.0504	92.303	-0.0622562	-0.812773
15.5793	169.569	12.0503	92.3018	-0.0622329	-0.812469
15.5877	169.651	12.0501	92.3006	-0.0622114	-0.812188
15.596	169.732	12.05	92.2994	-0.0621897	-0.811906
15.6043	169.812	12.0498	92.2982	-0.0621716	-0.811669
15.6127	169.901	12.0497	92.297	-0.0621494	-0.81138
15.621	169.989	12.0495	92.2958	-0.0621271	-0.811087
15.6293	170.069	12.0493	92.2944	-0.0621075	-0.810832
15.6377	170.151	12.0491	92.2927	-0.0620876	-0.810572
15.646	170.24	12.0489	92.2912	-0.0620667	-0.810299
15.6543	170.321	12.0487	92.2899	-0.0620469	-0.810041
15.6627	170.409	12.0486	92.2886	-0.0620279	-0.809793
15.671	170.491	12.0484	92.2873	-0.0620092	-0.809548
15.6793	170.573	12.0482	92.2861	-0.0619898	-0.809296
15.6877	170.656	12.0481	92.2847	-0.0619697	-0.809033
15.696	170.743	12.0479	92.2831	-0.0619487	-0.808759
15.7043	170.827	12.0477	92.2815	-0.0619288	-0.808499
15.7127	170.905	12.0475	92.2802	-0.0619082	-0.80823
15.721	170.991	12.0473	92.2789	-0.0618861	-0.807942
15.7293	171.071	12.0471	92.2776	-0.0618652	-0.807669
15.7377	171.157	12.047	92.2762	-0.0618441	-0.807394
15.746	171.246	12.0468	92.2748	-0.0618218	-0.807102
15.7543	171.323	12.0466	92.2734	-0.0617996	-0.806812
15.7627	171.409	12.0465	92.2723	-0.0617783	-0.806535
15.771	171.494	12.0463	92.2713	-0.0617558	-0.806241
15.7793	171.572	12.0462	92.2701	-0.0617344	-0.805961
15.7877	171.655	12.046	92.2691	-0.0617138	-0.805692
15.796	171.742	12.0458	92.2677	-0.061694	-0.805434
15.8043	171.826	12.0457	92.2663	-0.0616708	-0.805131
15.8127	171.906	12.0455	92.2651	-0.0616487	-0.804843
15.821	171.994	12.0453	92.2637	-0.0616273	-0.804563
15.8293	172.075	12.0451	92.2624	-0.0616075	-0.804305
15.8377	172.159	12.045	92.2612	-0.0615856	-0.804019
15.846	172.243	12.0448	92.2596	-0.0615636	-0.803731
15.8543	172.328	12.0446	92.258	-0.0615446	-0.803483
15.8627	172.408	12.0444	92.2563	-0.0615257	-0.803236
15.871	172.496	12.0442	92.2548	-0.0615041	-0.802955
15.8793	172.575	12.044	92.2536	-0.0614823	-0.80267
15.8877	172.662	12.0438	92.2524	-0.0614639	-0.802429
15.896	172.746	12.0437	92.2511	-0.0614456	-0.80219
15.9043	172.828	12.0435	92.25	-0.0614247	-0.801918
15.9127	172.914	12.0433	92.2485	-0.0614037	-0.801643
15.921	172.996	12.0432	92.2471	-0.0613843	-0.80139
15.9293	173.079	12.043	92.2457	-0.0613629	-0.801111
15.9377	173.164	12.0428	92.2445	-0.0613407	-0.800822
15.946	173.244	12.0427	92.2435	-0.061321	-0.800564
15.9543	173.333	12.0425	92.2422	-0.0613011	-0.800304
15.9627	173.415	12.0423	92.2409	-0.0612815	-0.800048
15.971	173.497	12.0421	92.2394	-0.0612602	-0.799771
15.9793	173.583	12.042	92.2381	-0.0612388	-0.799491
15.9877	173.667	12.0418	92.2367	-0.0612203	-0.79925
15.996	173.747	12.0416	92.2353	-0.0612016	-0.799005
16.0043	173.831	12.0414	92.234	-0.0611803	-0.798727
16.0127	173.914	12.0413	92.2327	-0.0611614	-0.79848
16.021	173.999	12.0411	92.2314	-0.0611414	-0.798219
16.0293	174.086	12.0409	92.23	-0.0611194	-0.797932
16.0377	174.168	12.0408	92.2288	-0.061099	-0.797666
16.046	174.253	12.0406	92.2275	-0.0610778	-0.797388
16.0543	174.334	12.0404	92.2263	-0.0610562	-0.797108
16.0627	174.42	12.0403	92.2249	-0.0610348	-0.796827
16.071	174.506	12.0401	92.2237	-0.0610127	-0.796539
16.0793	174.587	12.0399	92.2226	-0.0609902	-0.796246
16.0877	174.668	12.0398	92.2216	-0.0609707	-0.79599
16.096	174.751	12.0396	92.2203	-0.0609522	-0.795749
16.1043	174.834	12.0395	92.2191	-0.0609326	-0.795494
16.1127	174.921	12.0393	92.2177	-0.0609136	-0.795246
16.121	175.002	12.0392	92.2165	-0.0608927	-0.794973
16.1293	175.088	12.039	92.2154	-0.0608718	-0.7947
16.1377	175.169	12.0389	92.2142	-0.0608512	-0.794431
16.146	175.256	12.0387	92.213	-0.0608326	-0.794188
16.1543	175.335	12.0385	92.2118	-0.0608132	-0.793935
16.1627	175.423	12.0384	92.2105	-0.0607944	-0.793689
16.171	175.503	12.0382	92.2091	-0.0607763	-0.793453
16.1793	175.589	12.038	92.2078	-0.0607551	-0.793176
16.1877	175.675	12.0379	92.2066	-0.0607329	-0.792887
16.196	175.754	12.0377	92.2056	-0.0607111	-0.792601
16.2043	175.843	12.0376	92.2043	-0.060692	-0.792352
16.2127	175.924	12.0374	92.2029	-0.0606715	-0.792085
16.221	176.007	12.0372	92.2016	-0.0606509	-0.791816
16.2293	176.089	12.037	92.2001	-0.0606294	-0.791536
16.2377	176.175	12.0368	92.1987	-0.0606088	-0.791267
16.246	176.256	12.0367	92.1974	-0.0605903	-0.791025
16.2543	176.342	12.0365	92.196	-0.060569	-0.790747
16.2627	176.423	12.0363	92.1944	-0.0605477	-0.790468
16.271	176.506	12.0361	92.1931	-0.0605265	-0.790192
16.2793	176.591	12.0359	92.1918	-0.0605058	-0.789922
16.2877	176.674	12.0358	92.1905	-0.0604845	-0.789644
16.296	176.754	12.0356	92.1891	-0.0604635	-0.789369
16.3043	176.843	12.0354	92.1876	-0.0604439	-0.789113
16.3127	176.924	12.0352	92.1863	-0.060423	-0.78884
16.321	177.011	12.0351	92.1851	-0.0604015	-0.788559
16.3293	177.096	12.0349	92.1842	-0.0603789	-0.788265
16.3377	177.177	12.0348	92.1831	-0.0603592	-0.788007
16.346	177.262	12.0346	92.182	-0.0603409	-0.787769
16.3543	177.346	12.0345	92.1807	-0.0603235	-0.787542
16.3627	177.426	12.0343	92.1795	-0.0603065	-0.787319
16.371	177.514	12.0342	92.1782	-0.0602869	-0.787063
16.3793	177.594	12.034	92.177	-0.0602674	-0.786809
16.3877	177.683	12.0339	92.1759	-0.0602458	-0.786527
16.396	177.76	12.0337	92.1748	-0.0602268	-0.786279
16.4043	177.848	12.0335	92.1735	-0.0602064	-0.786012
16.4127	177.932	12.0334	92.172	-0.0601839	-0.785719
16.421	178.015	12.0332	92.1707	-0.0601637	-0.785455
16.4293	178.102	12.033	92.1696	-0.0601426	-0.785179
16.4377	178.186	12.0329	92.1683	-0.0601201	-0.784886
16.446	178.263	12.0327	92.167	-0.0600968	-0.784582
16.4543	178.351	12.0326	92.1659	-0.0600752	-0.7843
16.4627	178.433	12.0324	92.1649	-0.0600545	-0.78403
16.471	178.519	12.0323	92.1638	-0.0600334	-0.783753
16.4793	178.6	12.0321	92.1628	-0.0600129	-0.783487
16.4877	178.686	12.032	92.1616	-0.0599945	-0.783246
16.496	178.768	12.0319	92.1606	-0.0599769	-0.783016
16.5043	178.853	12.0317	92.1595	-0.0599555	-0.782737
16.5127	178.933	12.0316	92.1584	-0.0599355	-0.782476
16.521	179.02	12.0314	92.1572	-0.0599159	-0.782219
16.5293	179.1	12.0312	92.1559	-0.0598946	-0.781942
16.5377	179.185	12.0311	92.1548	-0.0598738	-0.78167
16.546	179.27	12.0309	92.1534	-0.0598526	-0.781394
16.5543	179.351	12.0307	92.152	-0.0598325	-0.781131
16.5627	179.433	12.0306	92.1508	-0.0598104	-0.780843
16.571	179.517	12.0304	92.1497	-0.0597889	-0.780562
16.5793	179.601	12.0303	92.1484	-0.0597676	-0.780284
16.5877	179.681	12.0301	92.1471	-0.0597458	-0.779999
16.596	179.768	12.0299	92.1457	-0.0597236	-0.77971
16.6043	179.857	12.0297	92.1444	-0.0597033	-0.779445
16.6127	179.939	12.0296	92.1433	-0.0596844	-0.779197
16.621	180.022	12.0295	92.1422	-0.0596649	-0.778944
16.6293	180.104	12.0293	92.1411	-0.0596461	-0.778697
16.6377	180.183	12.0291	92.1398	-0.0596288	-0.778471
16.646	180.273	12.029	92.1385	-0.0596114	-0.778245
[truncated: 9,880 more rows]
