# Supplementary material for: Comparative study on mechanisms for improving mechanical properties and microstructure of cement paste modified by different types of nanomaterials
Source: publisher site journal article supplement (doi:10.1515/ntrev-2021-0027), 2021-01-01
Supplement: Supplementary file 5 [file N-0-28d.xlsx]

## Sheet: Sheet1
Time (min)	Temperature (°C)	Weight (mg)			Temperature Difference (°C/mg)
0.000666667	21.176	14.3046	-0.636477	100	-0.0444947
0.00433333	21.2165	14.3046	-0.645083	99.9999	-0.0450963
0.0126667	21.2617	14.3043	-0.645359	99.9985	-0.0451156
0.021	21.3081	14.3042	-0.645805	99.9971	-0.0451468
0.0293333	21.3552	14.3039	-0.646439	99.9952	-0.045191
0.0376667	21.3959	14.3036	-0.647262	99.9931	-0.0452486
0.046	21.4474	14.3033	-0.648248	99.9909	-0.0453176
0.0543333	21.4906	14.3028	-0.649436	99.988	-0.0454006
0.0626667	21.5399	14.3025	-0.650801	99.9855	-0.045496
0.071	21.5772	14.3021	-0.652347	99.9828	-0.0456041
0.0793333	21.6309	14.3016	-0.65405	99.9795	-0.0457231
0.0876667	21.6608	14.3012	-0.655926	99.9762	-0.0458543
0.096	21.7111	14.3007	-0.657769	99.9728	-0.0459832
0.104333	21.7533	14.3002	-0.659629	99.9694	-0.0461131
0.112667	21.8005	14.2997	-0.661469	99.9661	-0.0462418
0.121	21.8383	14.2992	-0.663332	99.9627	-0.046372
0.129333	21.8836	14.2988	-0.665209	99.9597	-0.0465033
0.137667	21.923	14.2983	-0.667034	99.9564	-0.0466308
0.146	21.9682	14.2978	-0.66891	99.9527	-0.046762
0.154333	22.0085	14.2973	-0.670778	99.949	-0.0468926
0.162667	22.0541	14.2967	-0.672706	99.9451	-0.0470274
0.171	22.0942	14.2962	-0.674584	99.9418	-0.0471587
0.179333	22.1388	14.2957	-0.676473	99.938	-0.0472907
0.187667	22.1795	14.2952	-0.678359	99.9346	-0.0474225
0.196	22.2202	14.2947	-0.680263	99.931	-0.0475556
0.204333	22.2617	14.2941	-0.682147	99.9271	-0.0476873
0.212667	22.3035	14.2936	-0.684067	99.9231	-0.0478216
0.221	22.334	14.293	-0.686029	99.9192	-0.0479587
0.229333	22.3776	14.2925	-0.687951	99.9153	-0.0480931
0.237667	22.4157	14.2919	-0.689902	99.9116	-0.0482295
0.246	22.4562	14.2914	-0.691822	99.9078	-0.0483637
0.254333	22.4987	14.2908	-0.693762	99.9039	-0.0484993
0.262667	22.5365	14.2902	-0.695719	99.8998	-0.0486362
0.271	22.5756	14.2896	-0.697668	99.8953	-0.0487724
0.279333	22.6172	14.289	-0.699641	99.8912	-0.0489103
0.287667	22.6606	14.2884	-0.701652	99.8871	-0.0490509
0.296	22.7002	14.2879	-0.703607	99.8831	-0.0491875
0.304333	22.7337	14.2873	-0.7056	99.8791	-0.0493269
0.312667	22.7725	14.2867	-0.707601	99.8752	-0.0494668
0.321	22.8155	14.2861	-0.709601	99.8712	-0.0496066
0.329333	22.854	14.2855	-0.711644	99.8668	-0.0497494
0.337667	22.8833	14.2849	-0.713664	99.8628	-0.0498906
0.346	22.9306	14.2844	-0.715675	99.8589	-0.0500312
0.354333	22.9646	14.2838	-0.717732	99.8549	-0.050175
0.362667	22.997	14.2832	-0.71981	99.8508	-0.0503203
0.371	23.0394	14.2826	-0.721851	99.8466	-0.0504629
0.379333	23.0747	14.282	-0.723953	99.8423	-0.0506099
0.387667	23.1105	14.2814	-0.72603	99.8379	-0.0507551
0.396	23.1515	14.2807	-0.728122	99.8333	-0.0509013
0.404333	23.184	14.2801	-0.730227	99.8287	-0.0510485
0.412667	23.2241	14.2794	-0.732339	99.8241	-0.0511961
0.421	23.2619	14.2788	-0.734447	99.8196	-0.0513435
0.429333	23.2977	14.2781	-0.736576	99.815	-0.0514924
0.437667	23.3332	14.2774	-0.738742	99.8104	-0.0516438
0.446	23.3758	14.2767	-0.740876	99.8055	-0.0517929
0.454333	23.4078	14.276	-0.743014	99.8006	-0.0519424
0.462667	23.442	14.2753	-0.745176	99.7956	-0.0520935
0.471	23.4775	14.2747	-0.747381	99.791	-0.0522477
0.479333	23.5165	14.274	-0.749534	99.7862	-0.0523982
0.487667	23.5433	14.2733	-0.751681	99.7815	-0.0525483
0.496	23.582	14.2726	-0.75385	99.7767	-0.0526999
0.504333	23.62	14.2719	-0.756042	99.7719	-0.0528532
0.512667	23.6606	14.2712	-0.758256	99.7669	-0.053008
0.521	23.6899	14.2705	-0.760417	99.762	-0.053159
0.529333	23.7284	14.2699	-0.762573	99.7574	-0.0533097
0.537667	23.7621	14.2692	-0.764791	99.7528	-0.0534648
0.546	23.8098	14.2685	-0.766984	99.7481	-0.0536181
0.554333	23.8438	14.2678	-0.769135	99.7429	-0.0537685
0.562667	23.8798	14.2671	-0.771355	99.738	-0.0539237
0.571	23.9165	14.2664	-0.773631	99.733	-0.0540828
0.579333	23.957	14.2657	-0.77582	99.7284	-0.0542358
0.587667	23.9885	14.265	-0.777996	99.7236	-0.0543879
0.596	24.024	14.2644	-0.780182	99.7188	-0.0545407
0.604333	24.0625	14.2636	-0.782394	99.7139	-0.0546954
0.612667	24.1007	14.2629	-0.784646	99.709	-0.0548528
0.621	24.1321	14.2622	-0.786845	99.7041	-0.0550066
0.629333	24.1762	14.2616	-0.789033	99.6994	-0.0551595
0.637667	24.2111	14.2609	-0.791233	99.695	-0.0553133
0.646	24.2528	14.2603	-0.793424	99.6902	-0.0554665
0.654333	24.2912	14.2596	-0.795588	99.6853	-0.0556177
0.662667	24.3302	14.2588	-0.797858	99.6803	-0.0557765
0.671	24.3664	14.2581	-0.800159	99.6753	-0.0559373
0.679333	24.4089	14.2574	-0.802413	99.6702	-0.0560949
0.687667	24.4461	14.2567	-0.804677	99.6652	-0.0562531
0.696	24.4907	14.2559	-0.806873	99.66	-0.0564067
0.704333	24.5247	14.2552	-0.809109	99.6548	-0.056563
0.712667	24.5692	14.2544	-0.811382	99.6494	-0.0567219
0.721	24.6053	14.2537	-0.813635	99.644	-0.0568794
0.729333	24.6507	14.2529	-0.815882	99.6386	-0.0570365
0.737667	24.6838	14.2521	-0.81812	99.6335	-0.0571929
0.746	24.7267	14.2514	-0.820303	99.6283	-0.0573455
0.754333	24.7626	14.2507	-0.822511	99.6232	-0.0574998
0.762667	24.807	14.2499	-0.824714	99.618	-0.0576539
0.771	24.8544	14.2492	-0.82688	99.6129	-0.0578053
0.779333	24.8926	14.2484	-0.829119	99.6075	-0.0579618
0.787667	24.9324	14.2477	-0.831363	99.6024	-0.0581187
0.796	24.9741	14.2469	-0.833583	99.597	-0.0582739
0.804333	25.0219	14.2462	-0.835831	99.5917	-0.0584311
0.812667	25.0608	14.2454	-0.838102	99.5864	-0.0585898
0.821	25.1034	14.2446	-0.840366	99.5809	-0.0587481
0.829333	25.1493	14.2438	-0.842645	99.5754	-0.0589074
0.837667	25.196	14.2431	-0.844927	99.57	-0.0590669
0.846	25.235	14.2423	-0.847194	99.5645	-0.0592254
0.854333	25.2763	14.2415	-0.849489	99.5589	-0.0593859
0.862667	25.3222	14.2407	-0.85177	99.5535	-0.0595453
0.871	25.3633	14.2399	-0.854024	99.5481	-0.0597029
0.879333	25.4102	14.2392	-0.856273	99.5429	-0.0598601
0.887667	25.4549	14.2384	-0.858525	99.5376	-0.0600175
0.896	25.5027	14.2376	-0.860779	99.5321	-0.0601751
0.904333	25.5459	14.2369	-0.863037	99.5269	-0.0603329
0.912667	25.5912	14.2361	-0.865255	99.5215	-0.060488
0.921	25.6407	14.2353	-0.867479	99.516	-0.0606435
0.929333	25.6944	14.2346	-0.869728	99.5106	-0.0608007
0.937667	25.736	14.2338	-0.871983	99.5054	-0.0609583
0.946	25.7859	14.2331	-0.874246	99.5	-0.0611165
0.954333	25.8362	14.2323	-0.87649	99.4946	-0.0612734
0.962667	25.8829	14.2315	-0.878754	99.489	-0.0614317
0.971	25.9285	14.2307	-0.88102	99.4835	-0.0615901
0.979333	25.9779	14.2299	-0.883273	99.478	-0.0617476
0.987667	26.024	14.2291	-0.885524	99.4723	-0.061905
0.996	26.0721	14.2283	-0.88781	99.4666	-0.0620648
1.00433	26.1246	14.2275	-0.890087	99.4609	-0.062224
1.01267	26.1795	14.2266	-0.892403	99.4552	-0.0623858
1.021	26.2231	14.2258	-0.894691	99.4494	-0.0625459
1.02933	26.2744	14.225	-0.896977	99.4437	-0.0627056
1.03767	26.3251	14.2242	-0.899269	99.4379	-0.0628659
1.046	26.3807	14.2234	-0.90158	99.4323	-0.0630274
1.05433	26.4303	14.2226	-0.90391	99.4266	-0.0631903
1.06267	26.4858	14.2218	-0.906215	99.421	-0.0633514
1.071	26.5354	14.2209	-0.90854	99.4154	-0.063514
1.07933	26.5899	14.2201	-0.910853	99.4093	-0.0636756
1.08767	26.6477	14.2192	-0.913153	99.4034	-0.0638364
1.096	26.7003	14.2184	-0.915423	99.3973	-0.0639951
1.10433	26.7531	14.2175	-0.917755	99.3912	-0.0641581
1.11267	26.8077	14.2166	-0.920065	99.3852	-0.0643196
1.121	26.8647	14.2158	-0.922398	99.3793	-0.0644828
1.12933	26.9205	14.2149	-0.924704	99.3733	-0.064644
1.13767	26.9744	14.2141	-0.927031	99.3673	-0.0648066
1.146	27.0354	14.2132	-0.929374	99.3612	-0.0649704
1.15433	27.0855	14.2124	-0.93171	99.3553	-0.0651337
1.16267	27.142	14.2115	-0.934072	99.3495	-0.0652988
1.171	27.1979	14.2107	-0.936453	99.3438	-0.0654653
1.17933	27.2531	14.2099	-0.938858	99.3381	-0.0656334
1.18767	27.3088	14.2091	-0.941185	99.3325	-0.0657961
1.196	27.37	14.2082	-0.943588	99.3266	-0.0659641
1.20433	27.4272	14.2074	-0.945961	99.3206	-0.06613
1.21267	27.49	14.2065	-0.948336	99.3144	-0.066296
1.221	27.5446	14.2056	-0.9507	99.3083	-0.0664613
1.22933	27.6074	14.2048	-0.953118	99.3023	-0.0666303
1.23767	27.661	14.2039	-0.955569	99.2961	-0.0668016
1.246	27.7292	14.203	-0.957989	99.2899	-0.0669708
1.25433	27.7814	14.2021	-0.960397	99.2837	-0.0671392
1.26267	27.8462	14.2012	-0.962805	99.2773	-0.0673075
1.271	27.9024	14.2003	-0.965223	99.2709	-0.0674766
1.27933	27.9631	14.1994	-0.967643	99.2644	-0.0676457
1.28767	28.0269	14.1985	-0.970057	99.2582	-0.0678145
1.296	28.0901	14.1975	-0.972523	99.2518	-0.0679869
1.30433	28.1547	14.1966	-0.974998	99.2454	-0.0681599
1.31267	28.2248	14.1957	-0.977432	99.2388	-0.0683301
1.321	28.2872	14.1947	-0.979837	99.2321	-0.0684982
1.32933	28.3512	14.1938	-0.982304	99.2256	-0.0686706
1.33767	28.4159	14.1928	-0.984792	99.219	-0.0688445
1.346	28.4791	14.1919	-0.987259	99.2126	-0.0690171
1.35433	28.5424	14.191	-0.989773	99.2062	-0.0691928
1.36267	28.6111	14.1901	-0.992262	99.1996	-0.0693668
1.371	28.6762	14.1892	-0.99481	99.1932	-0.0695449
1.37933	28.7416	14.1883	-0.997288	99.1869	-0.0697181
1.38767	28.8111	14.1874	-0.999757	99.1806	-0.0698907
1.396	28.8789	14.1865	-1.00224	99.1742	-0.0700642
1.40433	28.9439	14.1855	-1.00475	99.1679	-0.0702399
1.41267	29.0131	14.1846	-1.00727	99.1615	-0.0704157
1.421	29.0802	14.1837	-1.0098	99.1551	-0.0705925
1.42933	29.1447	14.1828	-1.01234	99.1485	-0.0707707
1.43767	29.2141	14.1818	-1.01488	99.142	-0.0709481
1.446	29.2836	14.1809	-1.01744	99.1354	-0.0711267
1.45433	29.3541	14.1799	-1.01998	99.1287	-0.0713045
1.46267	29.4231	14.179	-1.02252	99.122	-0.0714823
1.471	29.4915	14.178	-1.02508	99.1152	-0.0716612
1.47933	29.5676	14.1771	-1.02766	99.1087	-0.0718414
1.48767	29.6286	14.1761	-1.03024	99.102	-0.0720217
1.496	29.7063	14.1751	-1.03278	99.095	-0.0721991
1.50433	29.7709	14.1741	-1.03528	99.0881	-0.0723743
1.51267	29.8465	14.1732	-1.03784	99.0814	-0.0725532
1.521	29.9151	14.1722	-1.04042	99.0748	-0.0727335
1.52933	29.9892	14.1713	-1.04297	99.068	-0.0729117
1.53767	30.0635	14.1702	-1.04559	99.061	-0.0730949
1.546	30.1336	14.1692	-1.04826	99.0538	-0.0732816
1.55433	30.2084	14.1682	-1.0509	99.0467	-0.073466
1.56267	30.2808	14.1672	-1.05353	99.0395	-0.0736495
1.571	30.3478	14.1662	-1.05615	99.0325	-0.0738333
1.57933	30.4252	14.1652	-1.05882	99.0257	-0.0740199
1.58767	30.4953	14.1642	-1.0615	99.0186	-0.0742068
1.596	30.573	14.1631	-1.06411	99.0114	-0.0743895
1.60433	30.6478	14.1621	-1.06673	99.0037	-0.074573
1.61267	30.7213	14.161	-1.06937	98.9963	-0.0747571
1.621	30.7975	14.1599	-1.07197	98.9888	-0.074939
1.62933	30.872	14.1589	-1.07461	98.9816	-0.0751234
1.63767	30.9463	14.1579	-1.07731	98.9745	-0.0753121
1.646	31.0243	14.1569	-1.08	98.9673	-0.0755001
1.65433	31.0987	14.1558	-1.08268	98.9599	-0.075688
1.66267	31.1773	14.1547	-1.0854	98.9526	-0.0758777
1.671	31.2484	14.1537	-1.08809	98.9452	-0.076066
1.67933	31.3243	14.1526	-1.09082	98.9379	-0.0762571
1.68767	31.3963	14.1516	-1.09359	98.9308	-0.07645
1.696	31.4815	14.1506	-1.09636	98.9235	-0.0766443
1.70433	31.555	14.1495	-1.09912	98.9162	-0.0768366
1.71267	31.6342	14.1485	-1.10184	98.909	-0.0770273
1.721	31.7125	14.1475	-1.10455	98.9017	-0.0772163
1.72933	31.795	14.1464	-1.10727	98.8941	-0.077407
1.73767	31.8618	14.1453	-1.11002	98.8864	-0.0775987
1.746	31.9452	14.1442	-1.11275	98.8789	-0.0777899
1.75433	32.0259	14.1431	-1.11553	98.8713	-0.0779844
1.76267	32.1052	14.142	-1.11829	98.8636	-0.0781773
1.771	32.1805	14.1409	-1.12105	98.8558	-0.0783701
1.77933	32.2614	14.1398	-1.1238	98.8481	-0.0785626
1.78767	32.3399	14.1387	-1.12656	98.8404	-0.0787552
1.796	32.4259	14.1376	-1.12937	98.8326	-0.0789518
1.80433	32.5007	14.1364	-1.13217	98.8246	-0.0791474
1.81267	32.5813	14.1353	-1.13495	98.817	-0.0793415
1.821	32.662	14.1342	-1.13773	98.809	-0.0795358
1.82933	32.7435	14.1331	-1.14051	98.801	-0.0797305
1.83767	32.8246	14.1319	-1.14331	98.793	-0.0799262
1.846	32.9074	14.1308	-1.14612	98.785	-0.0801226
1.85433	32.9776	14.1296	-1.14894	98.777	-0.08032
1.86267	33.0668	14.1285	-1.15178	98.7689	-0.0805181
1.871	33.1472	14.1273	-1.15467	98.7607	-0.0807206
1.87933	33.2291	14.1261	-1.1575	98.7522	-0.0809185
1.88767	33.3095	14.1249	-1.16035	98.744	-0.0811176
1.896	33.3936	14.1237	-1.16325	98.7357	-0.0813199
1.90433	33.4733	14.1226	-1.16614	98.7277	-0.0815223
1.91267	33.5557	14.1214	-1.16906	98.7196	-0.0817261
1.921	33.6392	14.1202	-1.17192	98.7113	-0.0819263
1.92933	33.7239	14.119	-1.17483	98.7029	-0.08213
1.93767	33.8035	14.1178	-1.17773	98.6944	-0.0823322
1.946	33.8888	14.1166	-1.18061	98.6859	-0.0825338
1.95433	33.9635	14.1154	-1.18347	98.6774	-0.0827339
1.96267	34.0506	14.1142	-1.18638	98.6693	-0.0829372
1.971	34.1337	14.113	-1.1893	98.6608	-0.0831413
1.97933	34.2215	14.1118	-1.19223	98.6521	-0.0833464
1.98767	34.3003	14.1105	-1.19518	98.6432	-0.0835526
1.996	34.3823	14.1093	-1.19812	98.6347	-0.0837578
2.00433	34.4635	14.1081	-1.20109	98.6262	-0.0839652
2.01267	34.5498	14.1068	-1.20403	98.6176	-0.084171
2.021	34.6299	14.1056	-1.20698	98.6093	-0.084377
2.02933	34.7198	14.1044	-1.20997	98.6009	-0.0845862
2.03767	34.798	14.1032	-1.21295	98.5923	-0.0847944
2.046	34.8845	14.1019	-1.21591	98.5835	-0.0850012
2.05433	34.9642	14.1007	-1.21889	98.5747	-0.0852096
2.06267	35.053	14.0994	-1.22186	98.5661	-0.0854172
2.071	35.141	14.0982	-1.2248	98.5575	-0.0856228
2.07933	35.2256	14.097	-1.22779	98.5486	-0.0858318
2.08767	35.31	14.0957	-1.23075	98.5398	-0.0860391
2.096	35.3941	14.0945	-1.23376	98.5312	-0.0862491
2.10433	35.4769	14.0932	-1.23679	98.5221	-0.0864609
2.11267	35.5644	14.0918	-1.23974	98.5129	-0.0866671
2.121	35.6421	14.0906	-1.24272	98.5039	-0.0868756
2.12933	35.7409	14.0893	-1.24572	98.4948	-0.0870857
2.13767	35.8126	14.088	-1.24873	98.4858	-0.0872962
2.146	35.9083	14.0866	-1.2518	98.4764	-0.0875108
2.15433	35.9872	14.0853	-1.25488	98.467	-0.087726
2.16267	36.0741	14.0839	-1.25791	98.4576	-0.0879378
2.171	36.1622	14.0826	-1.26095	98.448	-0.0881499
2.17933	36.248	14.0812	-1.26398	98.4385	-0.0883621
2.18767	36.3356	14.0799	-1.26703	98.4292	-0.0885755
2.196	36.4211	14.0785	-1.27014	98.4199	-0.0887929
2.20433	36.5012	14.0772	-1.27322	98.4105	-0.0890082
2.21267	36.5894	14.0758	-1.27632	98.4009	-0.0892244
2.221	36.6773	14.0745	-1.27941	98.3913	-0.0894406
2.22933	36.7607	14.0731	-1.28247	98.3816	-0.0896544
2.23767	36.8487	14.0717	-1.28553	98.3721	-0.0898685
2.246	36.935	14.0703	-1.28861	98.3623	-0.0900838
2.25433	37.0222	14.0689	-1.29176	98.3527	-0.0903043
2.26267	37.0996	14.0676	-1.29487	98.343	-0.0905216
2.271	37.1896	14.0662	-1.298	98.3333	-0.09074
2.27933	37.2784	14.0647	-1.30112	98.3234	-0.0909582
2.28767	37.3629	14.0633	-1.30427	98.3135	-0.0911786
2.296	37.449	14.0619	-1.30743	98.3035	-0.0913997
2.30433	37.5331	14.0605	-1.31053	98.2938	-0.0916161
2.31267	37.6161	14.0591	-1.31364	98.284	-0.0918334
2.321	37.711	14.0577	-1.31679	98.2741	-0.0920534
2.32933	37.7958	14.0563	-1.31994	98.2644	-0.0922744
2.33767	37.8813	14.0549	-1.32305	98.2545	-0.0924911
2.346	37.9642	14.0534	-1.32621	98.2443	-0.0927125
2.35433	38.0484	14.052	-1.32936	98.2341	-0.0929323
2.36267	38.14	14.0505	-1.3325	98.2238	-0.0931523
2.371	38.2276	14.049	-1.33564	98.2135	-0.0933713
2.37933	38.308	14.0476	-1.33874	98.2035	-0.0935883
2.38767	38.3976	14.0461	-1.34195	98.1933	-0.0938126
2.396	38.482	14.0447	-1.34518	98.183	-0.0940385
2.40433	38.5689	14.0432	-1.3484	98.1726	-0.0942636
2.41267	38.6576	14.0417	-1.35162	98.1622	-0.0944886
2.421	38.746	14.0402	-1.35482	98.1517	-0.0947122
2.42933	38.8347	14.0387	-1.35803	98.1412	-0.0949367
2.43767	38.9192	14.0372	-1.36123	98.1309	-0.0951606
2.446	39.0048	14.0357	-1.36443	98.1203	-0.0953842
2.45433	39.0874	14.0342	-1.36763	98.1097	-0.0956083
2.46267	39.1743	14.0326	-1.37088	98.099	-0.0958354
2.471	39.2642	14.0311	-1.37413	98.0882	-0.0960623
2.47933	39.3495	14.0295	-1.37733	98.0773	-0.0962859
2.48767	39.4386	14.028	-1.38054	98.0664	-0.0965106
2.496	39.5186	14.0264	-1.38374	98.0555	-0.096734
2.50433	39.6005	14.0249	-1.387	98.0446	-0.0969617
2.51267	39.6857	14.0233	-1.39023	98.0336	-0.0971879
2.521	39.778	14.0217	-1.39352	98.0227	-0.0974178
2.52933	39.8648	14.0202	-1.39684	98.0118	-0.0976499
2.53767	39.9486	14.0186	-1.40014	98.0007	-0.0978807
2.546	40.0337	14.017	-1.40343	97.9895	-0.0981105
2.55433	40.1186	14.0154	-1.40669	97.9784	-0.0983388
2.56267	40.2086	14.0138	-1.41001	97.9673	-0.0985704
2.571	40.2958	14.0122	-1.41333	97.9562	-0.0988027
2.57933	40.3771	14.0106	-1.41663	97.9451	-0.0990335
2.58767	40.4641	14.009	-1.41999	97.9339	-0.0992685
2.596	40.5493	14.0074	-1.42334	97.9228	-0.0995024
2.60433	40.6333	14.0058	-1.42663	97.9115	-0.0997325
2.61267	40.7152	14.0042	-1.42995	97.9003	-0.0999643
2.621	40.8054	14.0026	-1.43328	97.889	-0.100197
2.62933	40.8912	14.001	-1.43664	97.8779	-0.100432
2.63767	40.974	13.9994	-1.44003	97.8666	-0.100669
2.646	41.063	13.9978	-1.44336	97.8554	-0.100902
2.65433	41.1501	13.9962	-1.4467	97.844	-0.101135
2.66267	41.2329	13.9945	-1.45005	97.8327	-0.101369
2.671	41.3198	13.9929	-1.45338	97.8213	-0.101603
2.67933	41.4067	13.9913	-1.45672	97.8099	-0.101836
2.68767	41.4924	13.9896	-1.46007	97.7983	-0.10207
2.696	41.5699	13.988	-1.46341	97.7867	-0.102304
2.70433	41.6538	13.9863	-1.46679	97.7748	-0.10254
2.71267	41.7382	13.9846	-1.47017	97.763	-0.102776
2.721	41.8219	13.9829	-1.47355	97.7513	-0.103012
2.72933	41.9082	13.9812	-1.47694	97.7391	-0.103249
2.73767	41.9986	13.9794	-1.4803	97.727	-0.103485
2.746	42.0746	13.9777	-1.4837	97.7149	-0.103722
2.75433	42.1574	13.9759	-1.48711	97.7027	-0.10396
2.76267	42.2468	13.9742	-1.49053	97.6904	-0.1042
2.771	42.3247	13.9724	-1.49396	97.6781	-0.104439
2.77933	42.4123	13.9707	-1.49744	97.6659	-0.104682
2.78767	42.5018	13.9689	-1.50086	97.6537	-0.104922
2.796	42.58	13.9672	-1.50426	97.6413	-0.105159
2.80433	42.6591	13.9654	-1.50764	97.629	-0.105395
2.81267	42.7504	13.9636	-1.51107	97.6167	-0.105636
2.821	42.8346	13.9619	-1.51455	97.6043	-0.105879
2.82933	42.9205	13.9601	-1.51799	97.592	-0.106119
2.83767	43.001	13.9583	-1.52142	97.5795	-0.106359
2.846	43.0841	13.9566	-1.52489	97.5672	-0.106601
2.85433	43.1663	13.9548	-1.52833	97.5549	-0.106842
2.86267	43.2424	13.953	-1.53175	97.5425	-0.107081
2.871	43.3281	13.9512	-1.53522	97.53	-0.107324
2.87933	43.4176	13.9495	-1.53871	97.5174	-0.107567
2.88767	43.4999	13.9477	-1.5422	97.5049	-0.107812
2.896	43.5866	13.9459	-1.54567	97.4923	-0.108054
2.90433	43.6699	13.944	-1.54915	97.4795	-0.108297
2.91267	43.7477	13.9422	-1.55265	97.4668	-0.108542
2.921	43.837	13.9404	-1.55615	97.454	-0.108787
2.92933	43.9119	13.9385	-1.55964	97.441	-0.109031
2.93767	44.0029	13.9367	-1.56316	97.4281	-0.109277
2.946	44.0817	13.9348	-1.56667	97.415	-0.109522
2.95433	44.1658	13.933	-1.57017	97.4022	-0.109767
2.96267	44.2431	13.9311	-1.57371	97.389	-0.110014
2.971	44.3257	13.9292	-1.57726	97.3759	-0.110263
2.97933	44.4095	13.9273	-1.58077	97.3627	-0.110508
2.98767	44.4905	13.9254	-1.58424	97.3497	-0.110751
2.996	44.5728	13.9236	-1.58777	97.3364	-0.110998
3.00433	44.6548	13.9217	-1.59131	97.3232	-0.111245
3.01267	44.7427	13.9198	-1.59483	97.3099	-0.111491
3.021	44.8191	13.9178	-1.59835	97.2963	-0.111737
3.02933	44.9065	13.9159	-1.60192	97.2828	-0.111986
3.03767	44.9857	13.914	-1.60548	97.2695	-0.112235
3.046	45.0647	13.9121	-1.609	97.256	-0.112481
3.05433	45.148	13.9101	-1.6125	97.2426	-0.112726
3.06267	45.2296	13.9082	-1.61609	97.2291	-0.112977
3.071	45.3144	13.9063	-1.6197	97.2156	-0.11323
3.07933	45.3952	13.9043	-1.62325	97.202	-0.113477
3.08767	45.4752	13.9024	-1.62679	97.1885	-0.113725
3.096	45.5549	13.9004	-1.63036	97.1747	-0.113975
3.10433	45.6363	13.8985	-1.63393	97.161	-0.114224
3.11267	45.7207	13.8965	-1.63745	97.1475	-0.11447
3.121	45.8001	13.8946	-1.64101	97.1337	-0.114719
3.12933	45.8858	13.8926	-1.64462	97.1199	-0.114971
3.13767	45.964	13.8906	-1.64818	97.106	-0.115221
3.146	46.0511	13.8886	-1.65173	97.0921	-0.115469
3.15433	46.126	13.8866	-1.65528	97.0781	-0.115717
3.16267	46.204	13.8846	-1.6589	97.064	-0.11597
3.171	46.2905	13.8826	-1.66246	97.0498	-0.116219
3.17933	46.3676	13.8806	-1.66599	97.0358	-0.116466
3.18767	46.4509	13.8786	-1.66959	97.0218	-0.116717
3.196	46.5321	13.8765	-1.67323	97.0076	-0.116972
3.20433	46.6131	13.8745	-1.6768	96.9934	-0.117221
3.21267	46.6971	13.8725	-1.6804	96.9792	-0.117473
3.221	46.7685	13.8704	-1.68402	96.9648	-0.117726
3.22933	46.8511	13.8683	-1.68766	96.9504	-0.11798
3.23767	46.938	13.8663	-1.69126	96.9359	-0.118232
3.246	47.0151	13.8642	-1.69485	96.9213	-0.118483
3.25433	47.0948	13.8621	-1.69848	96.9069	-0.118737
3.26267	47.176	13.86	-1.70214	96.8925	-0.118992
3.271	47.2561	13.8579	-1.70576	96.8777	-0.119246
3.27933	47.3388	13.8558	-1.70938	96.863	-0.119499
3.28767	47.4133	13.8537	-1.71301	96.8482	-0.119752
3.296	47.4946	13.8516	-1.71661	96.8336	-0.120004
3.30433	47.5709	13.8495	-1.72023	96.8188	-0.120258
3.31267	47.6494	13.8474	-1.72387	96.8043	-0.120512
3.321	47.7306	13.8453	-1.72752	96.7897	-0.120767
3.32933	47.8157	13.8433	-1.73117	96.7752	-0.121022
3.33767	47.8835	13.8411	-1.7348	96.7603	-0.121276
3.346	47.9689	13.839	-1.73844	96.7453	-0.12153
3.35433	48.0461	13.8369	-1.74207	96.7303	-0.121784
3.36267	48.1337	13.8347	-1.74568	96.7155	-0.122036
3.371	48.2034	13.8326	-1.74933	96.7006	-0.122292
3.37933	48.2854	13.8304	-1.75295	96.6855	-0.122544
3.38767	48.3563	13.8283	-1.75656	96.6704	-0.122797
3.396	48.4413	13.8261	-1.76016	96.6551	-0.123049
3.40433	48.5213	13.8239	-1.76376	96.6399	-0.123301
3.41267	48.601	13.8217	-1.76737	96.6246	-0.123553
3.421	48.6812	13.8196	-1.771	96.6096	-0.123806
3.42933	48.7574	13.8174	-1.7746	96.5945	-0.124059
3.43767	48.8364	13.8153	-1.7782	96.5795	-0.12431
3.446	48.9191	13.8131	-1.78177	96.5642	-0.12456
3.45433	48.988	13.8109	-1.78536	96.5488	-0.124811
3.46267	49.0694	13.8087	-1.789	96.5333	-0.125065
3.471	49.1542	13.8065	-1.79263	96.5179	-0.125319
3.47933	49.2321	13.8043	-1.79622	96.5025	-0.125569
3.48767	49.3102	13.8021	-1.7998	96.4871	-0.12582
3.496	49.3863	13.7998	-1.80342	96.4715	-0.126073
3.50433	49.4632	13.7976	-1.80702	96.4559	-0.126324
3.51267	49.5435	13.7954	-1.81062	96.4403	-0.126576
3.521	49.6223	13.7931	-1.81425	96.4245	-0.12683
3.52933	49.6982	13.7909	-1.81784	96.4089	-0.127081
3.53767	49.779	13.7887	-1.82141	96.3933	-0.127331
3.546	49.8534	13.7864	-1.82492	96.3777	-0.127576
3.55433	49.9359	13.7841	-1.82847	96.3618	-0.127824
3.56267	50.0148	13.7819	-1.83202	96.3459	-0.128072
3.571	50.0934	13.7796	-1.83557	96.3301	-0.128321
3.57933	50.1654	13.7773	-1.8391	96.3143	-0.128567
3.58767	50.2502	13.7751	-1.84264	96.2986	-0.128815
3.596	50.3219	13.7728	-1.84617	96.2828	-0.129062
3.60433	50.4042	13.7706	-1.84968	96.2673	-0.129307
3.61267	50.4785	13.7684	-1.85317	96.2515	-0.129551
3.621	50.5565	13.7661	-1.85666	96.2357	-0.129795
3.62933	50.6311	13.7638	-1.86019	96.2199	-0.130042
3.63767	50.716	13.7616	-1.86367	96.2042	-0.130285
3.646	50.7847	13.7594	-1.86718	96.1886	-0.13053
3.65433	50.8646	13.7571	-1.87065	96.1727	-0.130773
3.66267	50.9401	13.7548	-1.87407	96.1568	-0.131012
3.671	51.0184	13.7526	-1.87748	96.141	-0.131251
3.67933	51.0985	13.7503	-1.88086	96.125	-0.131487
3.68767	51.1728	13.748	-1.88429	96.1089	-0.131726
3.696	51.2517	13.7457	-1.88772	96.093	-0.131966
3.70433	51.3304	13.7434	-1.89115	96.0767	-0.132206
3.71267	51.4084	13.741	-1.89457	96.0606	-0.132445
3.721	51.4871	13.7388	-1.89797	96.0446	-0.132683
3.72933	51.5621	13.7365	-1.90134	96.0285	-0.132918
3.73767	51.6372	13.7342	-1.90468	96.0124	-0.133152
3.746	51.7112	13.7318	-1.90803	95.9962	-0.133386
3.75433	51.7878	13.7295	-1.91137	95.98	-0.133619
3.76267	51.8688	13.7272	-1.91471	95.9636	-0.133853
3.771	51.9484	13.7249	-1.91799	95.9474	-0.134082
3.77933	52.0239	13.7226	-1.92127	95.9314	-0.134311
3.78767	52.1075	13.7203	-1.92452	95.9156	-0.134539
3.796	52.1801	13.718	-1.92773	95.8997	-0.134763
3.80433	52.2557	13.7157	-1.93094	95.8837	-0.134988
3.81267	52.3275	13.7134	-1.93417	95.8675	-0.135213
3.821	52.4064	13.7111	-1.9374	95.8513	-0.135439
3.82933	52.4871	13.7088	-1.94063	95.8348	-0.135665
3.83767	52.5688	13.7065	-1.9438	95.8187	-0.135886
3.846	52.6431	13.7042	-1.94695	95.8028	-0.136107
3.85433	52.7209	13.7019	-1.95006	95.7867	-0.136324
3.86267	52.801	13.6995	-1.95316	95.7702	-0.136541
3.871	52.8773	13.6972	-1.95626	95.7538	-0.136758
3.87933	52.9511	13.6948	-1.95934	95.7374	-0.136973
3.88767	53.033	13.6925	-1.96236	95.721	-0.137184
3.896	53.105	13.6902	-1.96532	95.7049	-0.137391
3.90433	53.1785	13.6879	-1.96828	95.6888	-0.137598
3.91267	53.2578	13.6856	-1.97124	95.6728	-0.137805
3.921	53.3306	13.6833	-1.97419	95.6566	-0.138011
3.92933	53.412	13.6809	-1.97714	95.6404	-0.138217
3.93767	53.4938	13.6786	-1.98009	95.6241	-0.138424
3.946	53.5639	13.6763	-1.98296	95.608	-0.138624
3.95433	53.6375	13.674	-1.98579	95.592	-0.138822
3.96267	53.7222	13.6717	-1.98859	95.5757	-0.139018
3.971	53.7986	13.6694	-1.9914	95.5597	-0.139214
3.97933	53.8743	13.6671	-1.99421	95.5436	-0.139411
3.98767	53.9497	13.6648	-1.99698	95.5274	-0.139604
3.996	54.0282	13.6625	-1.9997	95.5113	-0.139795
4.00433	54.1021	13.6602	-2.00241	95.4951	-0.139984
4.01267	54.1794	13.6579	-2.00508	95.479	-0.140171
4.021	54.257	13.6556	-2.00771	95.4631	-0.140355
4.02933	54.3311	13.6533	-2.01037	95.4472	-0.140541
4.03767	54.4094	13.651	-2.01299	95.4313	-0.140723
4.046	54.4902	13.6488	-2.01558	95.4155	-0.140904
4.05433	54.5645	13.6465	-2.01812	95.3997	-0.141082
4.06267	54.6416	13.6443	-2.02061	95.384	-0.141256
4.071	54.7206	13.642	-2.02306	95.3683	-0.141427
4.07933	54.7931	13.6398	-2.02551	95.3525	-0.141599
4.08767	54.8698	13.6375	-2.02792	95.337	-0.141767
4.096	54.9491	13.6353	-2.03027	95.3214	-0.141932
4.10433	55.0271	13.6331	-2.03262	95.3058	-0.142096
4.11267	55.0999	13.6308	-2.0349	95.2898	-0.142256
4.121	55.1818	13.6285	-2.03716	95.274	-0.142414
4.12933	55.2542	13.6263	-2.03942	95.2585	-0.142571
4.13767	55.3308	13.6241	-2.04168	95.2428	-0.142729
4.146	55.4137	13.6218	-2.04388	95.227	-0.142883
4.15433	55.4894	13.6196	-2.04604	95.2114	-0.143034
4.16267	55.5636	13.6173	-2.04817	95.1957	-0.143183
4.171	55.6422	13.6151	-2.05025	95.1799	-0.143329
4.17933	55.7138	13.6128	-2.0523	95.1643	-0.143472
4.18767	55.7943	13.6106	-2.0543	95.1487	-0.143612
4.196	55.872	13.6084	-2.05627	95.1334	-0.143749
4.20433	55.9477	13.6062	-2.05821	95.1181	-0.143885
4.21267	56.0272	13.604	-2.06011	95.1025	-0.144018
4.221	56.1072	13.6018	-2.06196	95.087	-0.144147
4.22933	56.1816	13.5996	-2.06379	95.0714	-0.144275
4.23767	56.2597	13.5974	-2.06558	95.056	-0.1444
4.246	56.337	13.5952	-2.06729	95.0409	-0.144519
4.25433	56.422	13.593	-2.06902	95.0256	-0.14464
4.26267	56.4951	13.5908	-2.07074	95.0104	-0.144761
4.271	56.5762	13.5886	-2.07241	94.9952	-0.144878
4.27933	56.6478	13.5865	-2.07405	94.9799	-0.144992
4.28767	56.7264	13.5843	-2.07564	94.9648	-0.145103
4.296	56.8031	13.5821	-2.0772	94.9497	-0.145212
4.30433	56.8809	13.58	-2.07872	94.9346	-0.145319
4.31267	56.9604	13.5778	-2.08025	94.9196	-0.145425
4.321	57.0329	13.5757	-2.08173	94.9044	-0.145529
4.32933	57.1193	13.5735	-2.0832	94.8893	-0.145632
4.33767	57.1981	13.5714	-2.08458	94.8745	-0.145728
4.346	57.2716	13.5693	-2.08592	94.8596	-0.145822
4.35433	57.351	13.5671	-2.08724	94.8447	-0.145914
4.36267	57.4242	13.565	-2.08855	94.8298	-0.146006
4.371	57.5055	13.5628	-2.08981	94.8147	-0.146094
4.37933	57.5788	13.5607	-2.09106	94.8	-0.146181
4.38767	57.6626	13.5586	-2.09227	94.7854	-0.146266
4.396	57.7401	13.5565	-2.09342	94.7707	-0.146347
4.40433	57.8208	13.5545	-2.09456	94.7562	-0.146426
4.41267	57.8943	13.5524	-2.09567	94.7415	-0.146504
4.421	57.9742	13.5502	-2.09673	94.7267	-0.146577
4.42933	58.0532	13.5481	-2.09777	94.7119	-0.146651
4.43767	58.1277	13.5461	-2.09876	94.6974	-0.146719
4.446	58.2139	13.544	-2.09976	94.683	-0.146789
4.45433	58.295	13.5419	-2.10071	94.6686	-0.146856
4.46267	58.3665	13.5398	-2.10159	94.6539	-0.146917
4.471	58.4509	13.5377	-2.10242	94.6393	-0.146976
4.47933	58.5319	13.5356	-2.10325	94.6246	-0.147034
4.48767	58.6003	13.5336	-2.10406	94.6101	-0.14709
4.496	58.6795	13.5315	-2.10482	94.5958	-0.147143
4.50433	58.7577	13.5295	-2.1056	94.5816	-0.147197
4.51267	58.8374	13.5274	-2.10635	94.5673	-0.14725
4.521	58.9192	13.5254	-2.10707	94.5529	-0.1473
4.52933	58.9951	13.5233	-2.10774	94.5385	-0.147347
4.53767	59.0747	13.5213	-2.1084	94.5242	-0.147393
4.546	59.1515	13.5192	-2.10903	94.5099	-0.147437
4.55433	59.2358	13.5172	-2.10962	94.4955	-0.147479
4.56267	59.3102	13.5152	-2.1102	94.4816	-0.147519
4.571	59.3922	13.5132	-2.11076	94.4674	-0.147558
4.57933	59.4654	13.5111	-2.11124	94.4531	-0.147592
4.58767	59.5483	13.5091	-2.11173	94.4388	-0.147626
4.596	59.6267	13.5071	-2.11217	94.4248	-0.147657
4.60433	59.7047	13.5051	-2.1126	94.4107	-0.147687
4.61267	59.791	13.5031	-2.11302	94.3968	-0.147716
4.621	59.8692	13.5011	-2.11341	94.3828	-0.147743
4.62933	59.9499	13.4991	-2.11382	94.3689	-0.147772
4.63767	60.0259	13.4971	-2.11419	94.355	-0.147798
4.646	60.1061	13.4951	-2.11451	94.3409	-0.147821
4.65433	60.1783	13.493	-2.11481	94.3268	-0.147842
4.66267	60.2604	13.4911	-2.11514	94.3131	-0.147865
4.671	60.3404	13.4892	-2.11542	94.2996	-0.147884
4.67933	60.4197	13.4872	-2.11565	94.2861	-0.147901
4.68767	60.4991	13.4853	-2.11584	94.2723	-0.147914
4.696	60.5785	13.4833	-2.11604	94.2585	-0.147927
4.70433	60.6556	13.4813	-2.1162	94.2449	-0.147938
4.71267	60.7337	13.4794	-2.11629	94.2312	-0.147945
4.721	60.8132	13.4774	-2.11637	94.2177	-0.147951
4.72933	60.8945	13.4755	-2.11646	94.2042	-0.147957
4.73767	60.9744	13.4736	-2.11651	94.1907	-0.14796
4.746	61.0564	13.4717	-2.11652	94.1773	-0.147961
4.75433	61.1388	13.4697	-2.11652	94.1636	-0.147961
4.76267	61.22	13.4678	-2.11653	94.1501	-0.147962
4.771	61.2947	13.4658	-2.11653	94.1366	-0.147962
4.77933	61.3775	13.4639	-2.11647	94.1233	-0.147957
4.78767	61.4519	13.462	-2.11639	94.1099	-0.147952
4.796	61.5328	13.4601	-2.11629	94.0965	-0.147945
4.80433	61.6136	13.4582	-2.11619	94.0831	-0.147938
4.81267	61.6991	13.4563	-2.1161	94.0701	-0.147931
4.821	61.7774	13.4545	-2.11594	94.0571	-0.147921
4.82933	61.858	13.4526	-2.11575	94.0441	-0.147907
4.83767	61.9345	13.4507	-2.11555	94.031	-0.147893
4.846	62.0149	13.4488	-2.11531	94.0178	-0.147876
4.85433	62.0968	13.447	-2.115	94.0046	-0.147855
4.86267	62.1793	13.4451	-2.11469	93.9913	-0.147833
4.871	62.2639	13.4432	-2.11435	93.9781	-0.147809
4.87933	62.3439	13.4413	-2.11402	93.9652	-0.147786
4.88767	62.4216	13.4395	-2.11361	93.9522	-0.147758
4.896	62.5026	13.4376	-2.11318	93.9392	-0.147727
4.90433	62.587	13.4357	-2.11277	93.9262	-0.147699
4.91267	62.6682	13.4339	-2.11232	93.9134	-0.147668
4.921	62.7478	13.4321	-2.11186	93.9006	-0.147635
4.92933	62.8296	13.4302	-2.1114	93.8878	-0.147603
4.93767	62.9073	13.4284	-2.11092	93.8748	-0.14757
4.946	62.9861	13.4266	-2.1104	93.8622	-0.147533
4.95433	63.0679	13.4248	-2.10983	93.8497	-0.147493
4.96267	63.1486	13.423	-2.10925	93.8369	-0.147453
4.971	63.2304	13.4212	-2.10866	93.8243	-0.147411
4.97933	63.3145	13.4194	-2.108	93.8119	-0.147366
4.98767	63.391	13.4176	-2.10736	93.7994	-0.147321
4.996	63.478	13.4158	-2.10671	93.7866	-0.147275
5.00433	63.5546	13.4139	-2.10599	93.7738	-0.147225
5.01267	63.6349	13.4122	-2.10523	93.7616	-0.147172
5.021	63.7182	13.4104	-2.10447	93.7493	-0.147119
5.02933	63.8051	13.4087	-2.10371	93.737	-0.147065
5.03767	63.8808	13.4069	-2.10293	93.7246	-0.147011
5.046	63.9609	13.4051	-2.10213	93.7123	-0.146955
5.05433	64.0443	13.4034	-2.1013	93.7003	-0.146897
5.06267	64.129	13.4017	-2.10049	93.6881	-0.14684
5.071	64.2039	13.3999	-2.09964	93.6759	-0.146781
5.07933	64.2863	13.3982	-2.09875	93.6638	-0.146719
5.08767	64.3659	13.3965	-2.09788	93.652	-0.146658
5.096	64.4575	13.3948	-2.09696	93.6398	-0.146594
5.10433	64.5322	13.393	-2.09605	93.6274	-0.14653
5.11267	64.6169	13.3912	-2.09516	93.6152	-0.146468
5.121	64.6955	13.3895	-2.09424	93.6033	-0.146404
5.12933	64.7832	13.3878	-2.09329	93.5913	-0.146337
5.13767	64.864	13.3861	-2.09235	93.5793	-0.146272
5.146	64.9478	13.3844	-2.09134	93.5672	-0.146201
5.15433	65.0275	13.3827	-2.09031	93.5553	-0.146129
5.16267	65.1095	13.381	-2.08928	93.5433	-0.146057
5.171	65.1932	13.3792	-2.08824	93.5312	-0.145984
5.17933	65.2731	13.3775	-2.08722	93.5191	-0.145913
5.18767	65.3559	13.3758	-2.08618	93.5075	-0.14584
5.196	65.4373	13.3742	-2.08507	93.4959	-0.145762
5.20433	65.5172	13.3725	-2.08392	93.4842	-0.145682
5.21267	65.609	13.3709	-2.0828	93.4727	-0.145604
5.221	65.6803	13.3692	-2.0817	93.4609	-0.145527
5.22933	65.7682	13.3675	-2.0806	93.449	-0.14545
5.23767	65.8501	13.3658	-2.07946	93.4376	-0.14537
5.246	65.9305	13.3642	-2.07831	93.4259	-0.14529
5.25433	66.0158	13.3625	-2.07713	93.4145	-0.145207
5.26267	66.1016	13.3609	-2.07591	93.4032	-0.145122
5.271	66.1794	13.3593	-2.07468	93.3917	-0.145036
5.27933	66.265	13.3576	-2.07348	93.3802	-0.144952
5.28767	66.3456	13.356	-2.07231	93.3688	-0.14487
5.296	66.4343	13.3544	-2.07105	93.3574	-0.144782
5.30433	66.5107	13.3528	-2.06975	93.3463	-0.144692
5.31267	66.6015	13.3512	-2.06848	93.3352	-0.144603
5.321	66.6777	13.3496	-2.06723	93.3238	-0.144515
5.32933	66.7635	13.348	-2.06591	93.3125	-0.144423
5.33767	66.8466	13.3463	-2.06461	93.301	-0.144332
5.346	66.9318	13.3447	-2.06334	93.2896	-0.144244
5.35433	67.0135	13.343	-2.06205	93.2782	-0.144153
5.36267	67.0955	13.3415	-2.06069	93.267	-0.144058
5.371	67.1747	13.3398	-2.05934	93.2557	-0.143964
5.37933	67.2617	13.3382	-2.05801	93.2443	-0.14387
5.38767	67.3404	13.3366	-2.05664	93.233	-0.143775
5.396	67.4237	13.335	-2.05524	93.2217	-0.143677
5.40433	67.5109	13.3334	-2.05385	93.2106	-0.14358
5.41267	67.597	13.3318	-2.05248	93.1997	-0.143484
5.421	67.6782	13.3303	-2.05111	93.1888	-0.143388
5.42933	67.7619	13.3287	-2.04968	93.1781	-0.143289
5.43767	67.8438	13.3272	-2.04826	93.1673	-0.143189
5.446	67.9334	13.3256	-2.04685	93.1562	-0.14309
5.45433	68.0093	13.324	-2.04545	93.1453	-0.142993
5.46267	68.0953	13.3225	-2.04405	93.1343	-0.142895
5.471	68.1786	13.3209	-2.04265	93.1232	-0.142797
5.47933	68.2608	13.3193	-2.04126	93.1123	-0.1427
5.48767	68.3424	13.3177	-2.03981	93.1013	-0.142598
5.496	68.4338	13.3162	-2.03835	93.0903	-0.142496
5.50433	68.5127	13.3146	-2.03689	93.0795	-0.142394
5.51267	68.5953	13.313	-2.03544	93.0684	-0.142293
5.521	68.6817	13.3115	-2.034	93.0573	-0.142192
5.52933	68.7687	13.3099	-2.03254	93.0465	-0.14209
5.53767	68.8478	13.3084	-2.03103	93.0357	-0.141985
5.546	68.9348	13.3068	-2.02953	93.025	-0.14188
5.55433	69.0164	13.3053	-2.02807	93.0144	-0.141778
5.56267	69.0986	13.3038	-2.02658	93.0038	-0.141674
5.571	69.1785	13.3023	-2.02514	92.9931	-0.141573
5.57933	69.2678	13.3007	-2.02373	92.9823	-0.141474
5.58767	69.3523	13.2992	-2.02226	92.9715	-0.141371
5.596	69.4363	13.2977	-2.0208	92.9609	-0.141269
5.60433	69.5134	13.2961	-2.0193	92.95	-0.141165
5.61267	69.6006	13.2946	-2.01783	92.9395	-0.141062
5.621	69.6868	13.2931	-2.01637	92.9289	-0.14096
5.62933	69.7696	13.2916	-2.01491	92.9183	-0.140858
5.63767	69.8514	13.29	-2.01342	92.9077	-0.140753
5.646	69.9387	13.2885	-2.01195	92.897	-0.140651
5.65433	70.0214	13.287	-2.01046	92.8864	-0.140547
5.66267	70.1073	13.2855	-2.00894	92.8758	-0.140441
5.671	70.184	13.284	-2.00746	92.8653	-0.140337
5.67933	70.274	13.2825	-2.00598	92.8549	-0.140233
5.68767	70.3556	13.281	-2.00454	92.8445	-0.140133
5.696	70.4438	13.2795	-2.00314	92.8338	-0.140035
5.70433	70.5259	13.2779	-2.00172	92.8231	-0.139936
5.71267	70.6144	13.2764	-2.0003	92.8124	-0.139837
5.721	70.7019	13.2749	-1.99892	92.8017	-0.13974
5.72933	70.7813	13.2734	-1.99755	92.791	-0.139644
5.73767	70.8654	13.2719	-1.99619	92.7805	-0.139549
5.746	70.9512	13.2703	-1.99485	92.7697	-0.139455
5.75433	71.03	13.2688	-1.99354	92.759	-0.139364
5.76267	71.1167	13.2673	-1.99221	92.7483	-0.139271
5.771	71.1933	13.2658	-1.99089	92.7379	-0.139179
5.77933	71.285	13.2642	-1.98954	92.7272	-0.139084
5.78767	71.3671	13.2627	-1.98825	92.7166	-0.138994
5.796	71.4546	13.2612	-1.987	92.7058	-0.138907
5.80433	71.5397	13.2596	-1.98577	92.6949	-0.138821
5.81267	71.6236	13.2581	-1.9845	92.6842	-0.138732
5.821	71.7067	13.2565	-1.98326	92.6733	-0.138645
5.82933	71.7938	13.255	-1.98208	92.6628	-0.138563
5.83767	71.8784	13.2535	-1.98093	92.6521	-0.138483
5.846	71.9606	13.252	-1.9798	92.6414	-0.138404
5.85433	72.0399	13.2504	-1.97868	92.6304	-0.138325
5.86267	72.1326	13.2488	-1.9776	92.6196	-0.138249
5.871	72.2128	13.2473	-1.97655	92.6087	-0.138176
5.87933	72.2995	13.2457	-1.97551	92.5978	-0.138103
5.88767	72.3773	13.2442	-1.97447	92.5871	-0.138031
5.896	72.4654	13.2426	-1.97349	92.5763	-0.137962
5.90433	72.5438	13.2411	-1.97257	92.5655	-0.137898
5.91267	72.6344	13.2395	-1.97163	92.5545	-0.137832
5.921	72.7147	13.238	-1.97071	92.5436	-0.137768
5.92933	72.8022	13.2364	-1.96985	92.5326	-0.137708
5.93767	72.8861	13.2348	-1.96903	92.5214	-0.137651
5.946	72.9698	13.2332	-1.9682	92.5104	-0.137592
5.95433	73.0526	13.2317	-1.96738	92.4995	-0.137535
5.96267	73.1351	13.2301	-1.96662	92.4888	-0.137482
5.971	73.2176	13.2286	-1.96589	92.4779	-0.137431
5.97933	73.3042	13.227	-1.96523	92.4667	-0.137385
5.98767	73.385	13.2254	-1.96456	92.4556	-0.137338
5.996	73.4704	13.2238	-1.96391	92.4443	-0.137292
6.00433	73.5533	13.2221	-1.96328	92.433	-0.137248
6.01267	73.6443	13.2205	-1.96267	92.4218	-0.137206
6.021	73.7214	13.219	-1.9621	92.4108	-0.137166
6.02933	73.8074	13.2174	-1.96161	92.3997	-0.137132
6.03767	73.8924	13.2158	-1.96114	92.3884	-0.137099
6.046	73.9695	13.2141	-1.96068	92.3771	-0.137067
6.05433	74.0561	13.2125	-1.9602	92.3658	-0.137033
6.06267	74.14	13.2109	-1.95972	92.3547	-0.137
6.071	74.2234	13.2093	-1.95931	92.3435	-0.136971
6.07933	74.3014	13.2078	-1.95893	92.3324	-0.136944
6.08767	74.3857	13.2061	-1.95859	92.3211	-0.136921
6.096	74.4746	13.2045	-1.95831	92.3098	-0.136901
6.10433	74.5559	13.2029	-1.95799	92.2984	-0.136879
6.11267	74.6433	13.2012	-1.95769	92.2869	-0.136858
6.121	74.7266	13.1996	-1.95741	92.2755	-0.136838
6.12933	74.8084	13.198	-1.95713	92.2641	-0.136818
6.13767	74.8889	13.1963	-1.95691	92.2525	-0.136803
6.146	74.9768	13.1946	-1.95674	92.2408	-0.136792
6.15433	75.0535	13.193	-1.95655	92.2293	-0.136778
6.16267	75.136	13.1913	-1.95637	92.2176	-0.136766
6.171	75.2204	13.1897	-1.95622	92.2062	-0.136755
6.17933	75.3058	13.1881	-1.95608	92.1947	-0.136745
6.18767	75.3899	13.1864	-1.95599	92.1831	-0.136739
6.196	75.4718	13.1848	-1.95594	92.1717	-0.136735
6.20433	75.5516	13.1831	-1.95591	92.1601	-0.136733
6.21267	75.6428	13.1814	-1.95589	92.1485	-0.136732
6.221	75.7242	13.1798	-1.95589	92.1369	-0.136732
6.22933	75.805	13.1781	-1.95589	92.1253	-0.136732
6.23767	75.8909	13.1765	-1.9559	92.1138	-0.136733
6.246	75.9719	13.1748	-1.95595	92.1023	-0.136736
6.25433	76.0527	13.1731	-1.95599	92.0904	-0.136739
6.26267	76.1412	13.1714	-1.95603	92.0785	-0.136741
6.271	76.2227	13.1698	-1.95609	92.0668	-0.136746
6.27933	76.3055	13.1681	-1.95615	92.0549	-0.13675
6.28767	76.3946	13.1664	-1.95621	92.043	-0.136754
6.296	76.4727	13.1647	-1.95633	92.0313	-0.136762
6.30433	76.5572	13.163	-1.95645	92.0196	-0.136771
6.31267	76.6374	13.1613	-1.95657	92.0078	-0.136779
6.321	76.7221	13.1596	-1.9567	91.996	-0.136788
6.32933	76.8091	13.1579	-1.95683	91.984	-0.136797
6.33767	76.8859	13.1562	-1.95696	91.9721	-0.136806
6.346	76.972	13.1545	-1.95712	91.9603	-0.136818
6.35433	77.0554	13.1528	-1.95727	91.9484	-0.136828
6.36267	77.14	13.1512	-1.95742	91.9368	-0.136839
6.371	77.2254	13.1494	-1.95759	91.9248	-0.13685
6.37933	77.3084	13.1478	-1.95772	91.913	-0.13686
6.38767	77.3873	13.146	-1.95785	91.901	-0.136869
6.396	77.472	13.1443	-1.95803	91.8891	-0.136881
6.40433	77.5559	13.1426	-1.95824	91.8771	-0.136896
6.41267	77.64	13.1409	-1.95844	91.8652	-0.13691
6.421	77.7215	13.1392	-1.95866	91.8532	-0.136925
6.42933	77.807	13.1375	-1.95887	91.8413	-0.13694
6.43767	77.8888	13.1358	-1.9591	91.8295	-0.136956
6.446	77.9764	13.1341	-1.95929	91.8176	-0.13697
6.45433	78.0513	13.1324	-1.95949	91.8057	-0.136984
6.46267	78.1425	13.1307	-1.95974	91.7937	-0.137001
6.471	78.2248	13.129	-1.95997	91.7817	-0.137017
6.47933	78.3101	13.1273	-1.96019	91.7698	-0.137032
6.48767	78.3913	13.1256	-1.96038	91.7579	-0.137046
6.496	78.4735	13.1239	-1.96058	91.7463	-0.13706
6.50433	78.5559	13.1222	-1.9608	91.7345	-0.137075
6.51267	78.6366	13.1205	-1.961	91.7226	-0.137089
6.521	78.718	13.1188	-1.96123	91.7105	-0.137105
6.52933	78.8047	13.1171	-1.96147	91.6984	-0.137122
6.53767	78.8837	13.1153	-1.96173	91.6863	-0.13714
6.546	78.9738	13.1136	-1.96195	91.6743	-0.137155
6.55433	79.0562	13.1119	-1.96216	91.6622	-0.13717
6.56267	79.14	13.1101	-1.9624	91.65	-0.137187
6.571	79.2172	13.1084	-1.96267	91.6378	-0.137206
6.57933	79.3075	13.1067	-1.96295	91.6257	-0.137225
6.58767	79.3855	13.1049	-1.96324	91.6134	-0.137246
6.596	79.4698	13.1031	-1.96352	91.6011	-0.137266
6.60433	79.5533	13.1014	-1.96379	91.589	-0.137284
6.61267	79.6422	13.0997	-1.96407	91.577	-0.137304
6.621	79.7178	13.098	-1.96437	91.5649	-0.137325
6.62933	79.8043	13.0962	-1.96466	91.5528	-0.137345
6.63767	79.8846	13.0945	-1.965	91.5407	-0.137368
6.646	79.9722	13.0927	-1.96527	91.5284	-0.137387
6.65433	80.052	13.091	-1.96554	91.5161	-0.137406
6.66267	80.1417	13.0893	-1.96582	91.504	-0.137426
6.671	80.2184	13.0876	-1.96614	91.4921	-0.137449
6.67933	80.3038	13.0858	-1.96643	91.4801	-0.137469
6.68767	80.3885	13.0841	-1.96674	91.468	-0.13749
6.696	80.4688	13.0824	-1.96706	91.4559	-0.137513
6.70433	80.5515	13.0807	-1.96737	91.4439	-0.137535
6.71267	80.6364	13.0789	-1.9677	91.4317	-0.137557
6.721	80.7201	13.0772	-1.96802	91.4195	-0.13758
6.72933	80.8066	13.0754	-1.96838	91.4074	-0.137605
6.73767	80.8888	13.0737	-1.96875	91.3955	-0.137631
6.746	80.9778	13.072	-1.96908	91.3833	-0.137654
6.75433	81.0511	13.0703	-1.96937	91.3712	-0.137674
6.76267	81.1444	13.0685	-1.96971	91.3591	-0.137698
6.771	81.221	13.0668	-1.97001	91.347	-0.137719
6.77933	81.3096	13.065	-1.97033	91.3347	-0.137741
6.78767	81.3881	13.0633	-1.97066	91.3226	-0.137764
6.796	81.4691	13.0616	-1.97098	91.3104	-0.137787
6.80433	81.5534	13.0598	-1.97132	91.2983	-0.137811
6.81267	81.6351	13.0581	-1.97164	91.2861	-0.137833
6.821	81.7205	13.0564	-1.97196	91.274	-0.137855
6.82933	81.8059	13.0546	-1.9723	91.2616	-0.137879
6.83767	81.886	13.0528	-1.97264	91.2494	-0.137903
6.846	81.9635	13.0511	-1.973	91.237	-0.137928
6.85433	82.0477	13.0493	-1.97335	91.225	-0.137953
6.86267	82.1302	13.0476	-1.97373	91.2129	-0.137979
6.871	82.2141	13.0459	-1.97411	91.2006	-0.138006
6.87933	82.2963	13.0441	-1.97449	91.1884	-0.138032
6.88767	82.3837	13.0423	-1.97481	91.176	-0.138055
6.896	82.4657	13.0406	-1.97515	91.1638	-0.138079
6.90433	82.5503	13.0388	-1.97548	91.1514	-0.138101
6.91267	82.6348	13.0371	-1.9758	91.1395	-0.138124
6.921	82.7124	13.0354	-1.97616	91.1274	-0.138149
6.92933	82.7998	13.0336	-1.97649	91.1152	-0.138172
6.93767	82.8812	13.0319	-1.9768	91.1029	-0.138194
6.946	82.9688	13.0301	-1.9771	91.0907	-0.138215
6.95433	83.0499	13.0284	-1.97741	91.0784	-0.138236
6.96267	83.129	13.0266	-1.97773	91.0663	-0.138259
6.971	83.2193	13.0249	-1.97809	91.0543	-0.138284
6.97933	83.2968	13.0232	-1.97844	91.0421	-0.138309
6.98767	83.3802	13.0214	-1.97879	91.0299	-0.138333
6.996	83.4641	13.0197	-1.97913	91.0175	-0.138356
7.00433	83.5464	13.0179	-1.97944	91.005	-0.138378
7.01267	83.628	13.0161	-1.97978	90.9926	-0.138402
7.021	83.7114	13.0143	-1.98013	90.9802	-0.138426
7.02933	83.7925	13.0125	-1.98044	90.9676	-0.138448
7.03767	83.8737	13.0107	-1.98075	90.9551	-0.138469
7.046	83.9637	13.009	-1.98102	90.9427	-0.138489
7.05433	84.0409	13.0072	-1.98129	90.9304	-0.138508
7.06267	84.1279	13.0054	-1.98157	90.9181	-0.138527
7.071	84.2112	13.0037	-1.98189	90.9058	-0.13855
7.07933	84.2908	13.0019	-1.9822	90.8935	-0.138571
7.08767	84.3711	13.0002	-1.98249	90.8815	-0.138592
7.096	84.4547	12.9985	-1.98278	90.8694	-0.138611
7.10433	84.5374	12.9968	-1.98305	90.8573	-0.13863
7.11267	84.627	12.995	-1.98331	90.8454	-0.138649
7.121	84.7033	12.9933	-1.98354	90.8333	-0.138665
7.12933	84.7942	12.9916	-1.9838	90.8212	-0.138683
7.13767	84.8712	12.9898	-1.98407	90.8089	-0.138702
7.146	84.9527	12.9881	-1.98429	90.7966	-0.138718
7.15433	85.0348	12.9863	-1.98451	90.7843	-0.138733
7.16267	85.1229	12.9846	-1.9847	90.7722	-0.138746
7.171	85.2029	12.9828	-1.9849	90.7601	-0.13876
7.17933	85.2889	12.9811	-1.98507	90.7477	-0.138772
7.18767	85.367	12.9793	-1.98527	90.7355	-0.138786
7.196	85.4486	12.9776	-1.98546	90.7233	-0.138799
7.20433	85.5307	12.9758	-1.98566	90.7111	-0.138813
7.21267	85.6149	12.9741	-1.9858	90.6989	-0.138823
7.221	85.6978	12.9724	-1.98595	90.6868	-0.138833
7.22933	85.7813	12.9706	-1.98608	90.6747	-0.138842
7.23767	85.8659	12.9689	-1.98617	90.6627	-0.138848
7.246	85.9528	12.9672	-1.98627	90.6505	-0.138855
7.25433	86.0336	12.9654	-1.98634	90.638	-0.13886
7.26267	86.1125	12.9636	-1.9864	90.6258	-0.138865
7.271	86.1966	12.9619	-1.98647	90.6135	-0.13887
7.27933	86.2832	12.9601	-1.98655	90.6014	-0.138875
7.28767	86.3625	12.9584	-1.9866	90.5896	-0.138879
7.296	86.4505	12.9567	-1.98664	90.5776	-0.138881
7.30433	86.5332	12.955	-1.98662	90.5655	-0.13888
7.31267	86.6116	12.9533	-1.98663	90.5536	-0.13888
7.321	86.6951	12.9516	-1.98659	90.5416	-0.138878
7.32933	86.7825	12.9498	-1.98653	90.5294	-0.138874
7.33767	86.8566	12.9482	-1.98649	90.5177	-0.138871
7.346	86.9507	12.9465	-1.98642	90.5063	-0.138866
7.35433	87.028	12.9449	-1.98632	90.4947	-0.138859
7.36267	87.1101	12.9432	-1.98616	90.483	-0.138848
7.371	87.193	12.9415	-1.986	90.4709	-0.138837
7.37933	87.2759	12.9398	-1.98585	90.4591	-0.138826
7.38767	87.362	12.9381	-1.98565	90.4473	-0.138812
7.396	87.451	12.9364	-1.98542	90.4355	-0.138796
7.40433	87.5229	12.9348	-1.98516	90.424	-0.138778
7.41267	87.6109	12.9331	-1.9849	90.4125	-0.13876
7.421	87.6918	12.9315	-1.98461	90.401	-0.13874
7.42933	87.7786	12.9298	-1.98431	90.3893	-0.138719
7.43767	87.8589	12.9282	-1.98393	90.3778	-0.138692
7.446	87.9387	12.9265	-1.98355	90.3663	-0.138665
7.45433	88.0259	12.9249	-1.98313	90.3549	-0.138636
7.46267	88.1132	12.9233	-1.9827	90.3436	-0.138606
7.471	88.1967	12.9216	-1.98227	90.3323	-0.138576
7.47933	88.2811	12.92	-1.9818	90.321	-0.138543
7.48767	88.364	12.9184	-1.98133	90.3094	-0.13851
7.496	88.4504	12.9168	-1.98079	90.2981	-0.138473
7.50433	88.528	12.9151	-1.98017	90.2868	-0.138429
7.51267	88.613	12.9135	-1.97957	90.2753	-0.138387
7.521	88.6967	12.9118	-1.97898	90.2638	-0.138346
7.52933	88.783	12.9103	-1.97834	90.2527	-0.138301
7.53767	88.8647	12.9087	-1.97768	90.2416	-0.138255
7.546	88.9554	12.9071	-1.97696	90.2304	-0.138205
7.55433	89.0317	12.9055	-1.97618	90.2191	-0.13815
7.56267	89.1219	12.9039	-1.97537	90.208	-0.138094
7.571	89.198	12.9023	-1.97452	90.1972	-0.138034
7.57933	89.2885	12.9008	-1.97367	90.1864	-0.137975
7.58767	89.3674	12.8992	-1.9728	90.1753	-0.137914
7.596	89.4556	12.8977	-1.97185	90.1646	-0.137848
7.60433	89.5373	12.8961	-1.97086	90.1537	-0.137778
7.61267	89.6271	12.8945	-1.96986	90.1428	-0.137708
7.621	89.71	12.893	-1.9688	90.132	-0.137635
7.62933	89.7928	12.8915	-1.96773	90.1213	-0.137559
7.63767	89.8711	12.89	-1.96663	90.1108	-0.137483
7.646	89.9596	12.8885	-1.96548	90.1004	-0.137402
7.65433	90.0477	12.887	-1.96429	90.0901	-0.137319
7.66267	90.1312	12.8855	-1.96305	90.0795	-0.137233
7.671	90.2079	12.884	-1.96178	90.0693	-0.137144
7.67933	90.2969	12.8825	-1.96047	90.0589	-0.137052
7.68767	90.3806	12.8811	-1.95913	90.0486	-0.136959
7.696	90.4641	12.8796	-1.95776	90.0385	-0.136863
7.70433	90.5461	12.8782	-1.95637	90.0284	-0.136765
7.71267	90.6353	12.8767	-1.95498	90.0182	-0.136668
7.721	90.7215	12.8753	-1.95351	90.0081	-0.136565
7.72933	90.807	12.8738	-1.95203	89.9979	-0.136462
7.73767	90.8884	12.8724	-1.95056	89.9878	-0.136359
7.746	90.9752	12.871	-1.94905	89.9779	-0.136254
7.75433	91.0558	12.8695	-1.94751	89.9679	-0.136146
7.76267	91.1424	12.8681	-1.94593	89.9579	-0.136036
7.771	91.2253	12.8667	-1.94433	89.9482	-0.135923
7.77933	91.3104	12.8653	-1.94268	89.9386	-0.135809
7.78767	91.3984	12.8639	-1.94101	89.9289	-0.135692
7.796	91.4816	12.8626	-1.93928	89.9193	-0.135571
7.80433	91.5667	12.8612	-1.93753	89.9096	-0.135449
7.81267	91.6468	12.8598	-1.93577	89.9	-0.135325
7.821	91.7363	12.8584	-1.934	89.8904	-0.135201
7.82933	91.8208	12.8571	-1.93216	89.8809	-0.135073
7.83767	91.902	12.8557	-1.93033	89.8713	-0.134945
7.846	91.9876	12.8544	-1.9285	89.8621	-0.134817
7.85433	92.0777	12.853	-1.92664	89.8528	-0.134687
7.86267	92.162	12.8517	-1.92475	89.8433	-0.134555
7.871	92.2512	12.8504	-1.92277	89.8342	-0.134417
7.87933	92.3323	12.8491	-1.92078	89.8249	-0.134277
7.88767	92.4182	12.8478	-1.91879	89.8158	-0.134139
7.896	92.5031	12.8465	-1.91679	89.8069	-0.133999
7.90433	92.5859	12.8452	-1.91475	89.7977	-0.133856
7.91267	92.6675	12.8439	-1.91272	89.7888	-0.133714
7.921	92.7588	12.8426	-1.91063	89.7799	-0.133568
7.92933	92.8454	12.8414	-1.90849	89.771	-0.133418
7.93767	92.9264	12.8401	-1.90632	89.7621	-0.133267
7.946	93.0076	12.8388	-1.90414	89.7532	-0.133114
7.95433	93.0987	12.8375	-1.90199	89.7442	-0.132964
7.96267	93.1788	12.8363	-1.89979	89.7354	-0.13281
7.971	93.2683	12.835	-1.89759	89.7267	-0.132656
7.97933	93.3552	12.8338	-1.89536	89.718	-0.1325
7.98767	93.439	12.8326	-1.89308	89.7095	-0.132341
7.996	93.5254	12.8313	-1.89073	89.7008	-0.132177
8.00433	93.6111	12.83	-1.8884	89.692	-0.132014
8.01267	93.6942	12.8288	-1.8861	89.6834	-0.131853
8.021	93.7814	12.8276	-1.88377	89.675	-0.13169
8.02933	93.8628	12.8264	-1.88142	89.6664	-0.131526
8.03767	93.95	12.8252	-1.87907	89.658	-0.131362
8.046	94.0363	12.824	-1.8767	89.6496	-0.131196
8.05433	94.1265	12.8228	-1.87429	89.6414	-0.131028
8.06267	94.2114	12.8216	-1.87184	89.6329	-0.130856
8.071	94.2954	12.8204	-1.86941	89.6245	-0.130686
8.07933	94.3799	12.8192	-1.86703	89.6162	-0.13052
8.08767	94.4673	12.8181	-1.8646	89.6081	-0.13035
8.096	94.5511	12.8169	-1.86212	89.5999	-0.130177
8.10433	94.6402	12.8157	-1.85967	89.5919	-0.130005
8.11267	94.7241	12.8146	-1.8572	89.5838	-0.129833
8.121	94.8063	12.8134	-1.85468	89.5756	-0.129657
8.12933	94.8956	12.8122	-1.85219	89.5673	-0.129483
8.13767	94.9798	12.811	-1.8497	89.5591	-0.129308
8.146	95.0638	12.8099	-1.84723	89.5512	-0.129136
8.15433	95.1522	12.8088	-1.84474	89.5433	-0.128962
8.16267	95.2344	12.8077	-1.84221	89.5356	-0.128784
8.171	95.3168	12.8066	-1.83968	89.5278	-0.128608
8.17933	95.4032	12.8054	-1.83718	89.5198	-0.128433
8.18767	95.4885	12.8043	-1.83463	89.5118	-0.128255
8.196	95.5791	12.8032	-1.83208	89.5039	-0.128077
8.20433	95.6624	12.802	-1.82955	89.4962	-0.127899
8.21267	95.7434	12.801	-1.827	89.4887	-0.127721
8.221	95.8299	12.7999	-1.82445	89.481	-0.127543
8.22933	95.9183	12.7988	-1.82189	89.4732	-0.127364
8.23767	96.002	12.7976	-1.81927	89.4653	-0.127181
8.246	96.0892	12.7965	-1.81673	89.4576	-0.127003
8.25433	96.171	12.7954	-1.81419	89.4498	-0.126826
8.26267	96.2576	12.7943	-1.8116	89.4421	-0.126645
8.271	96.3403	12.7932	-1.80903	89.4345	-0.126465
8.27933	96.432	12.7921	-1.80648	89.4269	-0.126287
8.28767	96.5135	12.791	-1.80393	89.4192	-0.126109
8.296	96.6057	12.7899	-1.80135	89.4114	-0.125928
8.30433	96.6898	12.7888	-1.79874	89.4038	-0.125746
8.31267	96.7749	12.7877	-1.79619	89.396	-0.125567
8.321	96.8594	12.7867	-1.79366	89.3886	-0.12539
8.32933	96.9468	12.7856	-1.79107	89.3812	-0.12521
8.33767	97.0344	12.7845	-1.78848	89.3737	-0.125029
8.346	97.1141	12.7834	-1.78595	89.3661	-0.124852
8.35433	97.2066	12.7823	-1.78338	89.3585	-0.124672
8.36267	97.2898	12.7813	-1.78081	89.351	-0.124493
8.371	97.3758	12.7803	-1.77823	89.3438	-0.124312
8.37933	97.4614	12.7792	-1.77569	89.3365	-0.124134
8.38767	97.549	12.7782	-1.77315	89.3293	-0.123957
8.396	97.6328	12.7772	-1.77061	89.3222	-0.123779
8.40433	97.7168	12.7761	-1.76806	89.3149	-0.123601
8.41267	97.7993	12.7751	-1.7655	89.3078	-0.123422
8.421	97.8861	12.7741	-1.76297	89.3006	-0.123245
8.42933	97.9778	12.773	-1.76039	89.2934	-0.123065
8.43767	98.0548	12.772	-1.75786	89.2864	-0.122888
8.446	98.1403	12.771	-1.7553	89.2793	-0.122709
8.45433	98.2305	12.77	-1.75277	89.2722	-0.122532
8.46267	98.3148	12.7689	-1.75025	89.2648	-0.122356
8.471	98.3976	12.7679	-1.74776	89.2576	-0.122182
8.47933	98.4888	12.7669	-1.74524	89.2504	-0.122006
8.48767	98.5752	12.7659	-1.74274	89.2432	-0.121831
8.496	98.6533	12.7648	-1.7403	89.2357	-0.121661
8.50433	98.7377	12.7637	-1.73781	89.2284	-0.121487
8.51267	98.8237	12.7627	-1.73535	89.2214	-0.121315
8.521	98.9109	12.7617	-1.7329	89.2141	-0.121143
8.52933	99.002	12.7607	-1.73048	89.2068	-0.120974
8.53767	99.0825	12.7596	-1.72807	89.1996	-0.120805
8.546	99.1686	12.7586	-1.72561	89.1927	-0.120634
8.55433	99.2538	12.7576	-1.72314	89.1856	-0.120461
8.56267	99.3399	12.7566	-1.72069	89.1785	-0.120289
8.571	99.4268	12.7556	-1.71827	89.1716	-0.120121
8.57933	99.5062	12.7547	-1.71582	89.1649	-0.119949
8.58767	99.6023	12.7537	-1.71342	89.158	-0.119781
8.596	99.6853	12.7527	-1.71107	89.1509	-0.119617
8.60433	99.7688	12.7517	-1.7087	89.1442	-0.119451
8.61267	99.8539	12.7507	-1.70629	89.1375	-0.119283
8.621	99.9458	12.7498	-1.70392	89.1306	-0.119117
8.62933	100.027	12.7487	-1.70152	89.1236	-0.118949
8.63767	100.112	12.7478	-1.69915	89.1167	-0.118784
8.646	100.2	12.7468	-1.6968	89.1096	-0.11862
8.65433	100.282	12.7457	-1.69446	89.1024	-0.118456
8.66267	100.366	12.7447	-1.69214	89.0954	-0.118294
8.671	100.455	12.7438	-1.68983	89.0887	-0.118132
8.67933	100.541	12.7428	-1.6875	89.082	-0.117969
8.68767	100.624	12.7418	-1.6852	89.075	-0.117808
8.696	100.709	12.7409	-1.68294	89.0684	-0.117651
8.70433	100.788	12.7399	-1.68064	89.0615	-0.11749
8.71267	100.882	12.7389	-1.67841	89.0549	-0.117334
8.721	100.967	12.7379	-1.6762	89.048	-0.117179
8.72933	101.051	12.737	-1.67396	89.0413	-0.117023
8.73767	101.14	12.736	-1.67174	89.0348	-0.116867
8.746	101.22	12.7351	-1.6695	89.0279	-0.116711
8.75433	101.312	12.7341	-1.66728	89.0211	-0.116556
8.76267	101.394	12.7331	-1.66507	89.0143	-0.116401
8.771	101.477	12.7322	-1.66283	89.0076	-0.116245
8.77933	101.565	12.7312	-1.6606	89.0007	-0.116089
8.78767	101.648	12.7302	-1.6584	88.9941	-0.115935
8.796	101.736	12.7293	-1.65616	88.9876	-0.115779
8.80433	101.82	12.7284	-1.65399	88.9812	-0.115626
8.81267	101.902	12.7274	-1.6518	88.9747	-0.115474
8.821	101.988	12.7265	-1.64962	88.9682	-0.115321
8.82933	102.075	12.7256	-1.64745	88.9616	-0.115169
8.83767	102.156	12.7247	-1.64525	88.9551	-0.115016
8.846	102.243	12.7237	-1.64306	88.9485	-0.114863
8.85433	102.329	12.7228	-1.6409	88.9419	-0.114712
8.86267	102.413	12.7219	-1.63874	88.9356	-0.11456
8.871	102.5	12.7209	-1.63661	88.9291	-0.114412
8.87933	102.583	12.72	-1.63453	88.9225	-0.114266
8.88767	102.669	12.719	-1.63241	88.9159	-0.114118
8.896	102.754	12.7181	-1.63029	88.9095	-0.11397
8.90433	102.84	12.7172	-1.62818	88.9029	-0.113822
8.91267	102.925	12.7162	-1.62607	88.8963	-0.113675
8.921	103.01	12.7153	-1.62399	88.8898	-0.113529
8.92933	103.096	12.7144	-1.6219	88.8835	-0.113383
8.93767	103.188	12.7134	-1.61983	88.8768	-0.113239
8.946	103.269	12.7125	-1.61779	88.8701	-0.113096
8.95433	103.356	12.7115	-1.6157	88.8633	-0.11295
8.96267	103.444	12.7106	-1.6136	88.857	-0.112803
8.971	103.525	12.7097	-1.61152	88.8505	-0.112658
8.97933	103.617	12.7087	-1.60948	88.8439	-0.112515
8.98767	103.695	12.7079	-1.60744	88.8377	-0.112372
8.996	103.781	12.7069	-1.60542	88.8313	-0.112231
9.00433	103.87	12.706	-1.60339	88.825	-0.11209
9.01267	103.95	12.7051	-1.60138	88.8187	-0.111949
9.021	104.039	12.7043	-1.59935	88.8126	-0.111807
9.02933	104.122	12.7034	-1.59731	88.8064	-0.111665
9.03767	104.211	12.7025	-1.59532	88.8003	-0.111525
9.046	104.288	12.7016	-1.59334	88.7939	-0.111387
9.05433	104.375	12.7007	-1.59136	88.7876	-0.111248
9.06267	104.463	12.6998	-1.58935	88.7815	-0.111108
9.071	104.549	12.6989	-1.58738	88.775	-0.11097
9.07933	104.634	12.698	-1.58543	88.7687	-0.110834
9.08767	104.716	12.6971	-1.58348	88.7625	-0.110698
9.096	104.805	12.6962	-1.58154	88.7563	-0.110562
9.10433	104.894	12.6953	-1.57963	88.75	-0.110428
9.11267	104.98	12.6944	-1.57771	88.7437	-0.110294
9.121	105.064	12.6935	-1.5758	88.7373	-0.11016
9.12933	105.15	12.6926	-1.57389	88.7311	-0.110027
9.13767	105.234	12.6917	-1.57197	88.7249	-0.109893
9.146	105.318	12.6908	-1.57007	88.7188	-0.10976
9.15433	105.406	12.69	-1.5682	88.7127	-0.109629
9.16267	105.487	12.6891	-1.5663	88.7065	-0.109496
9.171	105.573	12.6882	-1.56441	88.7002	-0.109364
9.17933	105.665	12.6873	-1.56252	88.6939	-0.109233
9.18767	105.743	12.6864	-1.56062	88.6878	-0.109099
9.196	105.831	12.6855	-1.55872	88.6818	-0.108967
9.20433	105.906	12.6847	-1.55686	88.6758	-0.108836
9.21267	105.997	12.6838	-1.55497	88.6698	-0.108704
9.221	106.09	12.6829	-1.55311	88.6636	-0.108574
9.22933	106.168	12.6821	-1.55123	88.6575	-0.108443
9.23767	106.252	12.6812	-1.54934	88.6515	-0.108311
9.246	106.341	12.6804	-1.54749	88.6455	-0.108181
9.25433	106.427	12.6795	-1.54563	88.6396	-0.108051
9.26267	106.509	12.6787	-1.54381	88.6336	-0.107925
9.271	106.598	12.6778	-1.54199	88.6274	-0.107797
9.27933	106.679	12.6769	-1.54017	88.6214	-0.10767
9.28767	106.766	12.6761	-1.53834	88.6155	-0.107542
9.296	106.853	12.6752	-1.53656	88.6097	-0.107417
9.30433	106.935	12.6744	-1.53475	88.6036	-0.107291
9.31267	107.02	12.6735	-1.53296	88.5977	-0.107165
9.321	107.104	12.6727	-1.53117	88.5918	-0.107041
9.32933	107.192	12.6718	-1.52938	88.5857	-0.106916
9.33767	107.271	12.6709	-1.5276	88.5797	-0.106791
9.346	107.357	12.6701	-1.52584	88.5737	-0.106668
9.35433	107.448	12.6692	-1.52407	88.5676	-0.106544
9.36267	107.532	12.6683	-1.52232	88.5614	-0.106422
9.371	107.616	12.6674	-1.5206	88.5552	-0.106302
9.37933	107.703	12.6666	-1.51885	88.5492	-0.10618
9.38767	107.786	12.6657	-1.51714	88.5433	-0.10606
9.396	107.87	12.6649	-1.51544	88.5374	-0.105941
9.40433	107.957	12.6641	-1.51371	88.5316	-0.10582
9.41267	108.046	12.6632	-1.51198	88.5258	-0.105699
9.421	108.128	12.6624	-1.51023	88.5198	-0.105577
9.42933	108.213	12.6616	-1.50849	88.5141	-0.105455
9.43767	108.295	12.6608	-1.50675	88.5084	-0.105334
9.446	108.384	12.66	-1.50503	88.5028	-0.105213
9.45433	108.467	12.6591	-1.5033	88.497	-0.105092
9.46267	108.555	12.6583	-1.50156	88.4911	-0.104971
9.471	108.635	12.6574	-1.49984	88.4851	-0.104851
9.47933	108.726	12.6566	-1.49814	88.4792	-0.104732
9.48767	108.808	12.6557	-1.49648	88.4733	-0.104615
9.496	108.894	12.6549	-1.49485	88.4674	-0.104501
9.50433	108.978	12.6541	-1.49325	88.4617	-0.104389
9.51267	109.064	12.6532	-1.49162	88.4559	-0.104275
9.521	109.145	12.6524	-1.49001	88.4502	-0.104163
9.52933	109.235	12.6516	-1.4884	88.4443	-0.104051
9.53767	109.32	12.6508	-1.48679	88.4387	-0.103938
9.546	109.404	12.65	-1.48519	88.4329	-0.103827
9.55433	109.485	12.6491	-1.48356	88.4273	-0.103713
9.56267	109.574	12.6483	-1.48195	88.4215	-0.1036
9.571	109.657	12.6475	-1.48031	88.4157	-0.103485
9.57933	109.743	12.6467	-1.47868	88.4099	-0.103371
9.58767	109.827	12.6458	-1.47708	88.4041	-0.103259
9.596	109.918	12.645	-1.47544	88.3984	-0.103145
9.60433	109.998	12.6442	-1.47381	88.3927	-0.103031
9.61267	110.084	12.6434	-1.47221	88.3872	-0.102919
9.621	110.169	12.6426	-1.4706	88.3815	-0.102807
9.62933	110.252	12.6418	-1.46902	88.376	-0.102696
9.63767	110.338	12.641	-1.46747	88.3702	-0.102587
9.646	110.423	12.6402	-1.46595	88.3646	-0.102481
9.65433	110.506	12.6394	-1.46442	88.3591	-0.102374
9.66267	110.596	12.6386	-1.46284	88.3536	-0.102264
9.671	110.675	12.6378	-1.46124	88.3481	-0.102152
9.67933	110.762	12.637	-1.45971	88.3425	-0.102045
9.68767	110.843	12.6362	-1.45821	88.337	-0.10194
9.696	110.928	12.6354	-1.45667	88.3313	-0.101833
9.70433	111.01	12.6346	-1.45515	88.3255	-0.101726
9.71267	111.101	12.6338	-1.4536	88.32	-0.101618
9.721	111.186	12.633	-1.45206	88.3146	-0.10151
9.72933	111.274	12.6322	-1.4505	88.309	-0.101401
9.73767	111.357	12.6314	-1.44893	88.3035	-0.101292
9.746	111.44	12.6306	-1.44739	88.2978	-0.101184
9.75433	111.525	12.6298	-1.44592	88.2921	-0.101081
9.76267	111.609	12.629	-1.44443	88.2864	-0.100977
9.771	111.688	12.6282	-1.44295	88.2809	-0.100873
9.77933	111.778	12.6274	-1.44147	88.2755	-0.10077
9.78767	111.864	12.6267	-1.43998	88.2703	-0.100666
9.796	111.95	12.6259	-1.43853	88.2647	-0.100564
9.80433	112.035	12.6251	-1.43708	88.2591	-0.100463
9.81267	112.117	12.6243	-1.43563	88.2537	-0.100361
9.821	112.203	12.6235	-1.43423	88.2481	-0.100264
9.82933	112.288	12.6227	-1.43281	88.2426	-0.100165
9.83767	112.375	12.6219	-1.43135	88.2371	-0.100062
9.846	112.461	12.6212	-1.42989	88.2316	-0.09996
9.85433	112.547	12.6204	-1.42842	88.226	-0.0998575
9.86267	112.629	12.6195	-1.42699	88.2203	-0.0997579
9.871	112.713	12.6187	-1.42559	88.2145	-0.0996596
9.87933	112.805	12.6179	-1.42415	88.2089	-0.099559
9.88767	112.883	12.6171	-1.42271	88.2033	-0.0994588
9.896	112.965	12.6163	-1.42131	88.1977	-0.0993603
9.90433	113.054	12.6155	-1.41987	88.1922	-0.0992602
9.91267	113.138	12.6147	-1.41846	88.1866	-0.0991612
9.921	113.22	12.614	-1.41706	88.1813	-0.0990633
9.92933	113.305	12.6132	-1.41566	88.1762	-0.0989657
9.93767	113.39	12.6125	-1.41425	88.1708	-0.0988671
9.946	113.475	12.6117	-1.41284	88.1655	-0.0987686
9.95433	113.56	12.611	-1.41145	88.1604	-0.0986714
9.96267	113.644	12.6102	-1.41009	88.155	-0.0985761
9.971	113.728	12.6094	-1.40871	88.1497	-0.0984797
9.97933	113.815	12.6087	-1.40734	88.1445	-0.0983839
9.98767	113.901	12.6079	-1.40597	88.1392	-0.0982879
9.996	113.982	12.6072	-1.40458	88.134	-0.0981911
10.0043	114.069	12.6064	-1.40325	88.1288	-0.0980977
10.0127	114.157	12.6056	-1.40191	88.1232	-0.0980046
10.021	114.241	12.6049	-1.40056	88.1177	-0.0979102
10.0293	114.327	12.6041	-1.39923	88.1123	-0.0978168
10.0377	114.406	12.6033	-1.39788	88.1067	-0.0977229
10.046	114.492	12.6025	-1.39657	88.1012	-0.0976314
10.0543	114.578	12.6017	-1.39527	88.0959	-0.0975404
10.0627	114.665	12.601	-1.39396	88.0904	-0.0974486
10.071	114.746	12.6002	-1.39267	88.0851	-0.097358
10.0793	114.832	12.5994	-1.39141	88.0798	-0.0972703
10.0877	114.914	12.5987	-1.39011	88.0744	-0.0971797
10.096	115.003	12.5979	-1.38881	88.0691	-0.0970888
10.1043	115.083	12.5972	-1.38755	88.064	-0.0970003
10.1127	115.17	12.5964	-1.38627	88.0588	-0.0969107
10.121	115.256	12.5957	-1.38497	88.0537	-0.0968204
10.1293	115.339	12.595	-1.38369	88.0484	-0.0967307
10.1377	115.419	12.5942	-1.38241	88.0431	-0.0966411
10.146	115.507	12.5934	-1.38113	88.0378	-0.0965515
10.1543	115.592	12.5927	-1.37985	88.0324	-0.0964622
10.1627	115.677	12.5919	-1.37857	88.0272	-0.0963727
10.171	115.762	12.5912	-1.37731	88.0221	-0.0962849
10.1793	115.849	12.5904	-1.37607	88.0169	-0.0961981
10.1877	115.931	12.5897	-1.37484	88.0116	-0.0961116
10.196	116.021	12.5889	-1.3736	88.0064	-0.0960253
10.2043	116.105	12.5882	-1.37243	88.0012	-0.0959433
10.2127	116.186	12.5875	-1.37121	87.996	-0.0958585
10.221	116.27	12.5867	-1.36997	87.9908	-0.0957718
10.2293	116.357	12.586	-1.36876	87.9856	-0.0956866
10.2377	116.439	12.5852	-1.36755	87.9804	-0.0956022
10.246	116.526	12.5845	-1.36633	87.9754	-0.0955169
10.2543	116.609	12.5837	-1.36509	87.97	-0.0954303
10.2627	116.694	12.583	-1.36388	87.9646	-0.095346
10.271	116.776	12.5822	-1.36268	87.9595	-0.0952622
10.2793	116.866	12.5815	-1.3615	87.9543	-0.0951794
10.2877	116.944	12.5807	-1.36028	87.9491	-0.0950944
10.296	117.032	12.58	-1.35909	87.9441	-0.095011
10.3043	117.117	12.5793	-1.35796	87.939	-0.094932
10.3127	117.2	12.5786	-1.35681	87.9339	-0.0948517
10.321	117.28	12.5778	-1.35562	87.9288	-0.0947685
10.3293	117.368	12.5771	-1.35445	87.9236	-0.0946868
10.3377	117.451	12.5764	-1.3533	87.9188	-0.0946064
10.346	117.538	12.5757	-1.35216	87.9137	-0.0945263
10.3543	117.623	12.5749	-1.35104	87.9086	-0.094448
10.3627	117.711	12.5742	-1.3499	87.9037	-0.0943681
10.371	117.796	12.5735	-1.34874	87.8984	-0.0942876
10.3793	117.876	12.5728	-1.34762	87.8933	-0.0942088
10.3877	117.962	12.572	-1.34648	87.8881	-0.0941297
10.396	118.045	12.5713	-1.34535	87.883	-0.0940502
10.4043	118.127	12.5705	-1.34427	87.8778	-0.0939745
10.4127	118.216	12.5698	-1.34317	87.8727	-0.093898
10.421	118.295	12.569	-1.34208	87.8673	-0.0938215
10.4293	118.389	12.5683	-1.34097	87.8621	-0.0937443
10.4377	118.467	12.5676	-1.33985	87.857	-0.093666
10.446	118.553	12.5668	-1.33876	87.8518	-0.0935898
10.4543	118.638	12.5661	-1.33769	87.847	-0.0935148
10.4627	118.724	12.5654	-1.33659	87.8418	-0.0934378
10.471	118.808	12.5647	-1.3355	87.8368	-0.093362
10.4793	118.893	12.5639	-1.33442	87.8317	-0.0932863
10.4877	118.98	12.5632	-1.33334	87.8266	-0.0932106
10.496	119.065	12.5625	-1.33227	87.8217	-0.0931362
10.5043	119.149	12.5618	-1.33122	87.817	-0.0930626
10.5127	119.234	12.5611	-1.33016	87.8119	-0.0929886
10.521	119.317	12.5604	-1.3291	87.8068	-0.0929142
10.5293	119.402	12.5597	-1.32804	87.8017	-0.0928406
10.5377	119.487	12.5589	-1.32701	87.7966	-0.0927683
10.546	119.566	12.5582	-1.326	87.7917	-0.0926974
10.5543	119.651	12.5575	-1.32499	87.7866	-0.092627
10.5627	119.74	12.5568	-1.32403	87.7816	-0.0925597
10.571	119.824	12.5561	-1.32305	87.7766	-0.0924912
10.5793	119.911	12.5553	-1.32206	87.7714	-0.0924219
10.5877	119.99	12.5546	-1.32106	87.7662	-0.0923525
10.596	120.077	12.5539	-1.32009	87.7612	-0.0922845
10.6043	120.158	12.5532	-1.31913	87.7563	-0.0922174
10.6127	120.248	12.5524	-1.31815	87.7513	-0.0921489
10.621	120.328	12.5517	-1.31718	87.746	-0.092081
10.6293	120.409	12.551	-1.31619	87.7408	-0.0920119
10.6377	120.493	12.5503	-1.3152	87.7359	-0.0919429
10.646	120.577	12.5496	-1.31422	87.7312	-0.0918741
10.6543	120.661	12.5488	-1.31325	87.7261	-0.0918063
10.6627	120.748	12.5481	-1.31231	87.7212	-0.0917403
10.671	120.835	12.5474	-1.3114	87.7162	-0.0916771
10.6793	120.915	12.5467	-1.31046	87.7111	-0.0916116
10.6877	121.005	12.546	-1.30956	87.7061	-0.0915483
10.696	121.087	12.5453	-1.30866	87.7012	-0.0914855
10.7043	121.173	12.5446	-1.30775	87.6962	-0.0914219
10.7127	121.255	12.5439	-1.30686	87.6913	-0.0913598
10.721	121.341	12.5431	-1.30599	87.6862	-0.0912989
10.7293	121.422	12.5424	-1.30516	87.6811	-0.0912411
10.7377	121.509	12.5417	-1.30431	87.6762	-0.0911812
10.746	121.592	12.541	-1.30343	87.6712	-0.0911196
10.7543	121.673	12.5403	-1.30253	87.6663	-0.0910573
10.7627	121.76	12.5396	-1.3017	87.6616	-0.0909989
10.771	121.843	12.5389	-1.30084	87.6569	-0.0909388
10.7793	121.932	12.5382	-1.29999	87.6521	-0.0908796
10.7877	122.011	12.5376	-1.29917	87.6472	-0.090822
10.796	122.094	12.5369	-1.29835	87.6423	-0.0907649
10.8043	122.18	12.5362	-1.29751	87.6376	-0.0907063
10.8127	122.257	12.5355	-1.29664	87.6329	-0.0906454
10.821	122.346	12.5348	-1.29579	87.6281	-0.0905858
10.8293	122.433	12.5341	-1.29498	87.6232	-0.0905293
10.8377	122.514	12.5334	-1.29414	87.6181	-0.0904705
10.846	122.6	12.5327	-1.2933	87.613	-0.0904113
10.8543	122.684	12.5319	-1.29246	87.6079	-0.0903529
10.8627	122.77	12.5312	-1.29163	87.6031	-0.0902946
10.871	122.849	12.5305	-1.29081	87.5982	-0.0902374
10.8793	122.937	12.5298	-1.29002	87.5933	-0.0901822
10.8877	123.02	12.5291	-1.28922	87.5882	-0.0901267
10.896	123.106	12.5284	-1.28841	87.583	-0.0900696
10.9043	123.194	12.5276	-1.28762	87.5777	-0.0900145
10.9127	123.278	12.5269	-1.28681	87.5729	-0.089958
10.921	123.36	12.5262	-1.28608	87.5681	-0.0899066
10.9293	123.442	12.5255	-1.28533	87.5631	-0.0898544
10.9377	123.524	12.5248	-1.2846	87.558	-0.0898034
10.946	123.613	12.5241	-1.28384	87.553	-0.0897506
10.9543	123.692	12.5233	-1.28306	87.5478	-0.0896958
10.9627	123.779	12.5226	-1.28228	87.5428	-0.0896415
10.971	123.861	12.5219	-1.28154	87.538	-0.0895896
10.9793	123.945	12.5212	-1.2808	87.5331	-0.0895379
10.9877	124.032	12.5205	-1.28008	87.5282	-0.0894877
10.996	124.112	12.5198	-1.27939	87.5233	-0.0894395
11.0043	124.191	12.5191	-1.27868	87.5183	-0.0893897
11.0127	124.288	12.5184	-1.27798	87.5133	-0.089341
11.021	124.362	12.5177	-1.27723	87.5084	-0.0892885
11.0293	124.449	12.517	-1.27656	87.5036	-0.0892411
11.0377	124.534	12.5163	-1.27591	87.4988	-0.0891956
11.046	124.62	12.5157	-1.27519	87.4941	-0.0891458
11.0543	124.701	12.515	-1.27449	87.4892	-0.0890965
11.0627	124.785	12.5142	-1.27381	87.4842	-0.089049
11.071	124.877	12.5135	-1.27312	87.4792	-0.0890009
11.0793	124.96	12.5128	-1.27244	87.4743	-0.0889537
11.0877	125.039	12.5122	-1.27178	87.4697	-0.0889073
11.096	125.121	12.5115	-1.27111	87.465	-0.0888603
11.1043	125.208	12.5108	-1.27046	87.4602	-0.088815
11.1127	125.292	12.5101	-1.26976	87.4554	-0.088766
11.121	125.378	12.5094	-1.26909	87.4504	-0.0887189
11.1293	125.457	12.5087	-1.26843	87.4458	-0.0886731
11.1377	125.543	12.5081	-1.26774	87.441	-0.0886249
11.146	125.627	12.5074	-1.26709	87.4361	-0.0885795
11.1543	125.712	12.5067	-1.26642	87.4314	-0.0885328
11.1627	125.794	12.506	-1.26575	87.4265	-0.0884858
11.171	125.88	12.5053	-1.26505	87.4216	-0.0884369
11.1793	125.964	12.5046	-1.26437	87.4167	-0.0883892
11.1877	126.046	12.5039	-1.26369	87.412	-0.0883419
11.196	126.13	12.5032	-1.26305	87.407	-0.088297
11.2043	126.213	12.5025	-1.26239	87.4023	-0.0882511
11.2127	126.3	12.5018	-1.26178	87.3972	-0.0882078
11.221	126.385	12.5011	-1.26117	87.3924	-0.0881659
11.2293	126.467	12.5004	-1.26052	87.3876	-0.0881202
11.2377	126.552	12.4997	-1.25992	87.3826	-0.0880784
11.246	126.635	12.499	-1.25932	87.3779	-0.0880365
11.2543	126.721	12.4984	-1.25872	87.3732	-0.0879944
11.2627	126.805	12.4977	-1.2581	87.3684	-0.0879511
11.271	126.892	12.497	-1.25749	87.3635	-0.0879082
11.2793	126.974	12.4963	-1.25687	87.3588	-0.0878646
11.2877	127.058	12.4956	-1.25627	87.3539	-0.0878233
11.296	127.138	12.4949	-1.25565	87.3491	-0.0877794
11.3043	127.221	12.4942	-1.25506	87.344	-0.0877381
11.3127	127.31	12.4935	-1.25448	87.3393	-0.0876976
11.321	127.392	12.4928	-1.25387	87.3346	-0.0876553
11.3293	127.472	12.4922	-1.25326	87.3301	-0.0876123
11.3377	127.557	12.4915	-1.25267	87.3252	-0.0875713
11.346	127.645	12.4908	-1.25209	87.3203	-0.0875306
11.3543	127.727	12.4901	-1.25152	87.3155	-0.0874911
11.3627	127.812	12.4894	-1.25096	87.3105	-0.0874517
11.371	127.898	12.4887	-1.25037	87.3059	-0.0874105
11.3793	127.981	12.4881	-1.24978	87.3012	-0.0873696
11.3877	128.064	12.4874	-1.24917	87.2966	-0.0873269
11.396	128.143	12.4867	-1.24859	87.2919	-0.0872861
11.4043	128.23	12.486	-1.24803	87.287	-0.0872468
11.4127	128.315	12.4853	-1.24746	87.2819	-0.0872072
11.421	128.4	12.4846	-1.24689	87.277	-0.0871672
11.4293	128.478	12.4839	-1.24631	87.2722	-0.0871266
11.4377	128.561	12.4832	-1.24576	87.2674	-0.0870881
11.446	128.651	12.4825	-1.24522	87.2627	-0.0870502
11.4543	128.734	12.4818	-1.24466	87.2577	-0.0870114
11.4627	128.82	12.4811	-1.24412	87.2527	-0.0869735
11.471	128.906	12.4804	-1.24361	87.2476	-0.0869379
11.4793	128.986	12.4797	-1.24307	87.2425	-0.0869005
11.4877	129.069	12.479	-1.24252	87.2377	-0.086862
11.496	129.162	12.4783	-1.24198	87.233	-0.0868241
11.5043	129.237	12.4776	-1.24146	87.2283	-0.0867879
11.5127	129.327	12.477	-1.24097	87.2236	-0.0867537
11.521	129.405	12.4762	-1.24045	87.2186	-0.0867168
11.5293	129.49	12.4755	-1.23991	87.2136	-0.0866795
11.5377	129.576	12.4749	-1.23941	87.2089	-0.0866443
11.546	129.663	12.4742	-1.23894	87.2041	-0.0866112
11.5543	129.741	12.4735	-1.23842	87.1994	-0.086575
11.5627	129.828	12.4728	-1.23789	87.1948	-0.0865384
11.571	129.909	12.4722	-1.23739	87.1902	-0.0865033
11.5793	129.995	12.4715	-1.23688	87.1854	-0.0864675
11.5877	130.081	12.4708	-1.23634	87.1805	-0.0864297
11.596	130.16	12.4701	-1.23583	87.1756	-0.0863938
11.6043	130.249	12.4694	-1.23532	87.1709	-0.0863587
11.6127	130.329	12.4687	-1.23483	87.1661	-0.0863241
11.621	130.412	12.4681	-1.23433	87.1614	-0.0862889
11.6293	130.497	12.4674	-1.2338	87.1567	-0.0862521
11.6377	130.579	12.4667	-1.23329	87.1518	-0.0862165
11.646	130.662	12.466	-1.23282	87.147	-0.0861839
11.6543	130.746	12.4653	-1.23232	87.1419	-0.0861485
11.6627	130.831	12.4646	-1.23182	87.137	-0.0861139
11.671	130.915	12.4639	-1.23133	87.1324	-0.0860793
11.6793	131.002	12.4632	-1.2308	87.1274	-0.0860428
11.6877	131.085	12.4625	-1.23032	87.1226	-0.0860087
11.696	131.167	12.4618	-1.22983	87.1178	-0.0859745
11.7043	131.256	12.4611	-1.22931	87.1129	-0.0859383
11.7127	131.333	12.4604	-1.2288	87.108	-0.0859028
11.721	131.415	12.4597	-1.22832	87.1033	-0.0858691
11.7293	131.499	12.459	-1.22784	87.0983	-0.0858352
11.7377	131.589	12.4583	-1.22736	87.0934	-0.0858017
11.746	131.672	12.4576	-1.22689	87.0885	-0.0857688
11.7543	131.755	12.4569	-1.22643	87.0834	-0.0857367
11.7627	131.838	12.4562	-1.22601	87.0787	-0.0857077
11.771	131.924	12.4556	-1.22555	87.074	-0.0856753
11.7793	132.005	12.4549	-1.22507	87.0692	-0.0856415
11.7877	132.094	12.4542	-1.22464	87.0643	-0.085612
11.796	132.178	12.4535	-1.22422	87.0596	-0.0855824
11.8043	132.258	12.4528	-1.22376	87.055	-0.0855506
11.8127	132.341	12.4522	-1.2233	87.0503	-0.0855178
11.821	132.428	12.4515	-1.22283	87.0457	-0.0854852
11.8293	132.511	12.4508	-1.22235	87.041	-0.0854514
11.8377	132.598	12.4502	-1.22189	87.0365	-0.0854192
11.846	132.681	12.4495	-1.22141	87.0316	-0.0853863
11.8543	132.763	12.4488	-1.22095	87.0267	-0.0853536
11.8627	132.841	12.4481	-1.2205	87.0219	-0.0853222
11.871	132.928	12.4474	-1.22002	87.0172	-0.085289
11.8793	133.014	12.4467	-1.21955	87.0124	-0.0852562
11.8877	133.096	12.4461	-1.21911	87.0076	-0.085225
11.896	133.179	12.4454	-1.21866	87.0027	-0.0851937
11.9043	133.262	12.4447	-1.21824	86.9979	-0.0851641
11.9127	133.345	12.444	-1.21781	86.9932	-0.085134
11.921	133.429	12.4433	-1.21734	86.9883	-0.0851014
11.9293	133.51	12.4426	-1.21686	86.9835	-0.085068
11.9377	133.598	12.4419	-1.21643	86.9787	-0.0850382
11.946	133.682	12.4412	-1.21601	86.9739	-0.0850086
11.9543	133.766	12.4405	-1.21556	86.969	-0.0849769
11.9627	133.851	12.4398	-1.21509	86.964	-0.0849443
11.971	133.936	12.4391	-1.21461	86.9592	-0.0849106
11.9793	134.016	12.4385	-1.21416	86.9547	-0.0848792
11.9877	134.103	12.4378	-1.21371	86.9499	-0.0848478
11.996	134.187	12.4371	-1.21328	86.9451	-0.0848174
12.0043	134.27	12.4364	-1.21284	86.9403	-0.0847872
12.0127	134.356	12.4358	-1.21242	86.9357	-0.0847573
12.021	134.439	12.4352	-1.21193	86.9313	-0.0847236
12.0293	134.522	12.4345	-1.21148	86.9268	-0.084692
12.0377	134.599	12.4339	-1.211	86.9224	-0.0846583
12.046	134.688	12.4332	-1.21055	86.9179	-0.0846267
12.0543	134.772	12.4326	-1.21008	86.9132	-0.0845939
12.0627	134.855	12.4319	-1.20958	86.9083	-0.0845592
12.071	134.939	12.4312	-1.20909	86.9037	-0.0845245
12.0793	135.02	12.4305	-1.20862	86.899	-0.0844919
12.0877	135.109	12.4299	-1.20815	86.8943	-0.0844587
12.096	135.193	12.4292	-1.20766	86.8896	-0.0844246
12.1043	135.273	12.4285	-1.20717	86.8848	-0.0843907
12.1127	135.361	12.4278	-1.20662	86.8799	-0.084352
12.121	135.444	12.4271	-1.20613	86.8752	-0.0843175
12.1293	135.527	12.4265	-1.20561	86.8706	-0.0842817
12.1377	135.611	12.4258	-1.20513	86.866	-0.084248
12.146	135.695	12.4252	-1.20463	86.8615	-0.084213
12.1543	135.773	12.4245	-1.2041	86.8569	-0.0841758
12.1627	135.862	12.4238	-1.20355	86.8523	-0.0841377
12.171	135.946	12.4232	-1.20302	86.8478	-0.0841005
12.1793	136.029	12.4226	-1.20249	86.8433	-0.0840632
12.1877	136.107	12.4219	-1.20194	86.8388	-0.0840248
12.196	136.201	12.4213	-1.20141	86.8344	-0.0839882
12.2043	136.282	12.4207	-1.20088	86.8299	-0.0839508
12.2127	136.363	12.42	-1.20034	86.8255	-0.0839131
12.221	136.449	12.4194	-1.19977	86.821	-0.0838732
12.2293	136.531	12.4187	-1.19922	86.8165	-0.0838348
12.2377	136.616	12.4181	-1.1987	86.8121	-0.0837985
12.246	136.698	12.4175	-1.19814	86.8076	-0.083759
12.2543	136.788	12.4168	-1.19757	86.803	-0.0837196
12.2627	136.866	12.4161	-1.19699	86.7983	-0.083679
12.271	136.955	12.4154	-1.19642	86.7936	-0.0836389
12.2793	137.037	12.4148	-1.19586	86.7889	-0.0835996
12.2877	137.121	12.4141	-1.19527	86.7844	-0.0835583
12.296	137.202	12.4135	-1.19467	86.78	-0.0835167
12.3043	137.293	12.4128	-1.19408	86.7753	-0.0834754
12.3127	137.374	12.4122	-1.19346	86.7707	-0.0834321
12.321	137.458	12.4115	-1.19281	86.7663	-0.083387
12.3293	137.542	12.4109	-1.19219	86.7618	-0.0833436
12.3377	137.629	12.4103	-1.19156	86.7575	-0.083299
12.346	137.712	12.4097	-1.19092	86.7533	-0.0832544
12.3543	137.792	12.4091	-1.19031	86.749	-0.0832118
12.3627	137.88	12.4085	-1.18965	86.7447	-0.0831657
12.371	137.957	12.4078	-1.18904	86.7404	-0.0831228
12.3793	138.043	12.4072	-1.18839	86.736	-0.0830776
12.3877	138.129	12.4066	-1.18776	86.7316	-0.0830336
12.396	138.212	12.406	-1.18715	86.7274	-0.082991
12.4043	138.294	12.4054	-1.18652	86.7231	-0.0829472
12.4127	138.376	12.4047	-1.18585	86.7188	-0.0829003
12.421	138.465	12.4041	-1.18519	86.7145	-0.0828539
12.4293	138.546	12.4035	-1.18453	86.7102	-0.0828079
12.4377	138.631	12.4029	-1.18385	86.7059	-0.0827605
12.446	138.713	12.4023	-1.1832	86.7017	-0.082715
12.4543	138.801	12.4017	-1.18252	86.6975	-0.0826671
12.4627	138.888	12.4011	-1.18184	86.6933	-0.0826196
12.471	138.969	12.4005	-1.18116	86.689	-0.082572
12.4793	139.05	12.3999	-1.18045	86.6847	-0.0825226
12.4877	139.136	12.3992	-1.17976	86.6803	-0.0824741
12.496	139.224	12.3986	-1.17907	86.6761	-0.0824263
12.5043	139.306	12.398	-1.17836	86.6717	-0.0823764
12.5127	139.388	12.3974	-1.17763	86.6674	-0.0823257
12.521	139.475	12.3968	-1.1769	86.6631	-0.0822747
12.5293	139.555	12.3962	-1.17619	86.6589	-0.0822251
12.5377	139.638	12.3956	-1.17547	86.6547	-0.0821747
12.546	139.73	12.395	-1.17478	86.6504	-0.0821261
12.5543	139.816	12.3943	-1.17404	86.646	-0.0820746
12.5627	139.895	12.3937	-1.17332	86.6418	-0.082024
12.571	139.976	12.3931	-1.1726	86.6375	-0.0819735
12.5793	140.061	12.3925	-1.17187	86.6332	-0.0819228
12.5877	140.15	12.3919	-1.17118	86.629	-0.0818745
12.596	140.231	12.3913	-1.17049	86.6247	-0.081826
12.6043	140.315	12.3907	-1.16979	86.6206	-0.0817772
12.6127	140.395	12.3901	-1.16905	86.6164	-0.0817256
12.621	140.481	12.3895	-1.16833	86.6122	-0.0816752
12.6293	140.566	12.3889	-1.16758	86.6081	-0.0816231
12.6377	140.649	12.3883	-1.16684	86.6039	-0.0815713
12.646	140.732	12.3877	-1.16612	86.5999	-0.0815211
12.6543	140.819	12.3872	-1.16537	86.596	-0.0814686
12.6627	140.902	12.3866	-1.16465	86.592	-0.081418
12.671	140.989	12.386	-1.16387	86.588	-0.0813634
12.6793	141.07	12.3855	-1.1631	86.5839	-0.0813096
12.6877	141.152	12.3849	-1.16232	86.58	-0.0812554
12.696	141.238	12.3843	-1.16155	86.5759	-0.0812012
12.7043	141.321	12.3837	-1.16077	86.5718	-0.0811471
12.7127	141.407	12.3831	-1.16	86.5677	-0.0810929
12.721	141.495	12.3826	-1.15923	86.5637	-0.0810392
12.7293	141.576	12.382	-1.15844	86.5595	-0.0809838
12.7377	141.661	12.3814	-1.15767	86.5553	-0.08093
12.746	141.748	12.3808	-1.15691	86.5511	-0.0808769
12.7543	141.831	12.3802	-1.15618	86.547	-0.0808262
12.7627	141.913	12.3796	-1.15543	86.5431	-0.0807733
12.771	141.995	12.3791	-1.15462	86.5392	-0.0807169
12.7793	142.083	12.3785	-1.15386	86.5351	-0.0806641
12.7877	142.168	12.3779	-1.1531	86.5312	-0.0806107
12.796	142.25	12.3774	-1.15234	86.5273	-0.0805571
12.8043	142.337	12.3768	-1.15157	86.5235	-0.0805036
12.8127	142.417	12.3763	-1.15078	86.5197	-0.0804483
12.821	142.5	12.3757	-1.14999	86.516	-0.0803933
12.8293	142.583	12.3752	-1.14918	86.5123	-0.0803366
12.8377	142.672	12.3747	-1.14837	86.5084	-0.0802798
12.846	142.755	12.3741	-1.14756	86.5044	-0.0802232
12.8543	142.839	12.3735	-1.14681	86.5001	-0.0801706
12.8627	142.921	12.3729	-1.146	86.4963	-0.0801141
12.871	143.008	12.3724	-1.1452	86.4924	-0.0800584
12.8793	143.094	12.3718	-1.14442	86.4887	-0.0800036
12.8877	143.175	12.3713	-1.14359	86.4849	-0.0799461
12.896	143.261	12.3707	-1.14281	86.481	-0.0798915
12.9043	143.346	12.3702	-1.14199	86.4772	-0.0798338
12.9127	143.429	12.3696	-1.14117	86.4733	-0.0797765
12.921	143.511	12.3691	-1.14037	86.4695	-0.0797203
12.9293	143.599	12.3685	-1.13957	86.4657	-0.0796648
12.9377	143.68	12.368	-1.13876	86.462	-0.0796081
12.946	143.77	12.3675	-1.13799	86.4582	-0.0795541
12.9543	143.854	12.3669	-1.13715	86.4544	-0.0794957
12.9627	143.939	12.3663	-1.13632	86.4503	-0.0794377
12.971	144.022	12.3658	-1.13553	86.4463	-0.0793823
12.9793	144.101	12.3652	-1.13473	86.4424	-0.0793265
12.9877	144.185	12.3647	-1.13395	86.4385	-0.0792719
12.996	144.271	12.3641	-1.13315	86.4348	-0.0792161
13.0043	144.358	12.3636	-1.13233	86.431	-0.0791583
13.0127	144.437	12.3631	-1.13151	86.4273	-0.0791014
13.021	144.522	12.3625	-1.13071	86.4236	-0.0790451
13.0293	144.609	12.362	-1.12988	86.4197	-0.0789871
13.0377	144.692	12.3614	-1.12908	86.4159	-0.0789315
13.046	144.778	12.3609	-1.12827	86.4122	-0.0788744
13.0543	144.865	12.3604	-1.12745	86.4085	-0.0788172
13.0627	144.95	12.3598	-1.12662	86.4048	-0.0787593
13.071	145.036	12.3593	-1.12577	86.4009	-0.0787003
13.0793	145.114	12.3587	-1.12495	86.3971	-0.078643
13.0877	145.202	12.3582	-1.12417	86.3934	-0.0785879
13.096	145.283	12.3576	-1.12334	86.3895	-0.0785304
13.1043	145.369	12.3571	-1.12252	86.3859	-0.0784727
13.1127	145.459	12.3566	-1.1217	86.3823	-0.0784156
13.121	145.536	12.3561	-1.1209	86.3785	-0.0783597
13.1293	145.622	12.3556	-1.12011	86.3749	-0.0783045
13.1377	145.706	12.3551	-1.1193	86.3713	-0.078248
13.146	145.786	12.3545	-1.11849	86.3677	-0.0781908
13.1543	145.875	12.354	-1.11772	86.364	-0.0781373
13.1627	145.962	12.3535	-1.11695	86.3604	-0.0780833
13.171	146.041	12.353	-1.11615	86.3567	-0.0780274
13.1793	146.127	12.3524	-1.11538	86.3532	-0.0779738
13.1877	146.21	12.3519	-1.11459	86.3494	-0.0779186
13.196	146.293	12.3514	-1.11381	86.3456	-0.0778639
13.2043	146.382	12.3508	-1.11302	86.342	-0.0778086
13.2127	146.461	12.3503	-1.1122	86.3382	-0.0777514
13.221	146.55	12.3498	-1.11143	86.3345	-0.0776974
13.2293	146.637	12.3493	-1.11064	86.331	-0.0776425
13.2377	146.717	12.3488	-1.10986	86.3274	-0.0775878
13.246	146.8	12.3483	-1.10906	86.3239	-0.0775318
13.2543	146.888	12.3478	-1.10827	86.3204	-0.0774763
13.2627	146.971	12.3473	-1.10746	86.3168	-0.0774197
13.271	147.053	12.3468	-1.10669	86.3134	-0.077366
13.2793	147.136	12.3463	-1.10589	86.31	-0.0773102
13.2877	147.224	12.3458	-1.10508	86.3065	-0.0772539
13.296	147.306	12.3453	-1.1043	86.303	-0.077199
13.3043	147.39	12.3447	-1.10348	86.2993	-0.0771415
13.3127	147.476	12.3442	-1.10267	86.2956	-0.077085
13.321	147.558	12.3437	-1.10185	86.292	-0.0770276
13.3293	147.644	12.3432	-1.10107	86.2886	-0.0769733
13.3377	147.73	12.3427	-1.10029	86.2852	-0.0769186
13.346	147.81	12.3422	-1.09949	86.2814	-0.0768632
13.3543	147.895	12.3416	-1.0987	86.2777	-0.0768075
13.3627	147.982	12.3411	-1.0979	86.2739	-0.0767518
13.371	148.065	12.3406	-1.09709	86.2703	-0.0766949
13.3793	148.15	12.3401	-1.09629	86.2667	-0.076639
13.3877	148.234	12.3396	-1.09553	86.2632	-0.0765863
13.396	148.321	12.3391	-1.09478	86.2597	-0.0765339
13.4043	148.404	12.3385	-1.09401	86.256	-0.0764799
13.4127	148.485	12.338	-1.09318	86.2522	-0.0764218
13.421	148.571	12.3375	-1.0924	86.2485	-0.0763671
13.4293	148.657	12.337	-1.09162	86.245	-0.076313
13.4377	148.741	12.3365	-1.09086	86.2416	-0.0762593
13.446	148.824	12.336	-1.0901	86.2383	-0.0762063
13.4543	148.91	12.3355	-1.08936	86.2349	-0.0761544
13.4627	148.991	12.335	-1.08861	86.2313	-0.0761023
13.471	149.077	12.3345	-1.08786	86.2279	-0.0760499
13.4793	149.159	12.334	-1.08709	86.2245	-0.0759956
13.4877	149.241	12.3336	-1.08632	86.2212	-0.0759419
13.496	149.328	12.3331	-1.0856	86.2178	-0.0758918
13.5043	149.417	12.3326	-1.08487	86.2145	-0.0758408
13.5127	149.496	12.3321	-1.08414	86.2111	-0.0757898
13.521	149.584	12.3316	-1.08339	86.2077	-0.0757376
13.5293	149.664	12.3312	-1.08264	86.2043	-0.0756851
13.5377	149.752	12.3307	-1.0819	86.2008	-0.075633
13.546	149.835	12.3302	-1.08117	86.1974	-0.075582
13.5543	149.916	12.3297	-1.0804	86.1939	-0.0755285
13.5627	150.004	12.3291	-1.07965	86.1902	-0.0754759
13.571	150.089	12.3286	-1.07893	86.1866	-0.0754254
13.5793	150.174	12.3281	-1.0782	86.1831	-0.0753743
13.5877	150.256	12.3276	-1.07744	86.1796	-0.0753217
13.596	150.338	12.3271	-1.07672	86.176	-0.0752708
13.6043	150.424	12.3266	-1.07596	86.1724	-0.0752176
13.6127	150.505	12.3261	-1.07522	86.1687	-0.075166
13.621	150.593	12.3256	-1.0745	86.1652	-0.0751157
13.6293	150.679	12.3251	-1.07376	86.1618	-0.0750643
13.6377	150.758	12.3246	-1.07305	86.1585	-0.0750141
13.646	150.844	12.3241	-1.07234	86.1551	-0.074965
13.6543	150.929	12.3237	-1.0716	86.152	-0.0749131
13.6627	151.012	12.3232	-1.07082	86.1486	-0.0748587
13.671	151.102	12.3227	-1.07005	86.1452	-0.0748049
13.6793	151.182	12.3222	-1.0693	86.1418	-0.0747526
13.6877	151.266	12.3217	-1.06859	86.1383	-0.0747028
13.696	151.351	12.3212	-1.06786	86.1351	-0.0746518
13.7043	151.427	12.3208	-1.06711	86.1318	-0.0745992
13.7127	151.517	12.3203	-1.06638	86.1283	-0.0745481
13.721	151.602	12.3198	-1.06565	86.1249	-0.0744974
13.7293	151.685	12.3193	-1.06493	86.1214	-0.0744467
13.7377	151.772	12.3188	-1.06423	86.1177	-0.0743982
13.746	151.862	12.3183	-1.06353	86.1144	-0.0743492
13.7543	151.938	12.3178	-1.06281	86.1111	-0.0742985
13.7627	152.019	12.3174	-1.06207	86.1079	-0.0742472
13.771	152.106	12.3169	-1.06136	86.1047	-0.0741975
13.7793	152.19	12.3164	-1.06064	86.1012	-0.0741471
13.7877	152.275	12.3159	-1.05992	86.0979	-0.0740969
13.796	152.362	12.3154	-1.05922	86.0944	-0.0740479
13.8043	152.443	12.315	-1.0585	86.0912	-0.0739975
13.8127	152.528	12.3145	-1.05775	86.0879	-0.0739447
13.821	152.612	12.314	-1.05699	86.0847	-0.0738917
13.8293	152.695	12.3136	-1.05628	86.0814	-0.0738422
13.8377	152.781	12.3131	-1.0556	86.0779	-0.0737948
13.846	152.865	12.3126	-1.05489	86.0744	-0.073745
13.8543	152.946	12.3121	-1.05417	86.0708	-0.0736946
13.8627	153.033	12.3116	-1.05346	86.0676	-0.0736452
13.871	153.121	12.3111	-1.05276	86.0642	-0.073596
13.8793	153.201	12.3106	-1.05202	86.0607	-0.0735443
13.8877	153.286	12.3101	-1.05129	86.0574	-0.0734933
13.896	153.37	12.3097	-1.05059	86.0542	-0.0734447
13.9043	153.453	12.3092	-1.04989	86.051	-0.0733954
13.9127	153.537	12.3087	-1.04918	86.0477	-0.0733458
13.921	153.624	12.3083	-1.04845	86.0445	-0.0732948
13.9293	153.703	12.3078	-1.04774	86.0413	-0.0732453
13.9377	153.791	12.3074	-1.04706	86.0384	-0.0731974
13.946	153.872	12.307	-1.04635	86.0352	-0.0731478
13.9543	153.96	12.3065	-1.04566	86.0319	-0.0730994
13.9627	154.039	12.3061	-1.04494	86.0288	-0.0730496
13.971	154.127	12.3056	-1.04422	86.0255	-0.072999
13.9793	154.201	12.3051	-1.04351	86.0224	-0.0729494
13.9877	154.291	12.3047	-1.0428	86.0192	-0.0729001
13.996	154.376	12.3042	-1.04211	86.0161	-0.0728513
14.0043	154.461	12.3038	-1.04143	86.0128	-0.0728042
14.0127	154.55	12.3033	-1.04073	86.0095	-0.0727549
14.021	154.633	12.3028	-1.04001	86.0062	-0.0727051
14.0293	154.71	12.3024	-1.03932	86.0031	-0.0726566
14.0377	154.796	12.3019	-1.03863	85.9999	-0.0726082
14.046	154.877	12.3015	-1.03795	85.9967	-0.0725611
14.0543	154.965	12.301	-1.03729	85.9937	-0.0725146
14.0627	155.051	12.3006	-1.03661	85.9905	-0.072467
14.071	155.135	12.3001	-1.03593	85.9873	-0.0724197
14.0793	155.217	12.2996	-1.03524	85.9841	-0.0723711
14.0877	155.307	12.2992	-1.03455	85.9811	-0.072323
14.096	155.391	12.2988	-1.03386	85.9779	-0.0722749
14.1043	155.473	12.2983	-1.03315	85.9747	-0.0722252
14.1127	155.557	12.2979	-1.03245	85.9715	-0.072176
14.121	155.642	12.2974	-1.03173	85.9685	-0.0721258
14.1293	155.726	12.297	-1.03103	85.9655	-0.072077
14.1377	155.804	12.2966	-1.03034	85.9625	-0.0720289
14.146	155.894	12.2961	-1.02965	85.9593	-0.0719806
14.1543	155.976	12.2957	-1.02898	85.9561	-0.0719339
14.1627	156.061	12.2952	-1.02829	85.953	-0.0718854
14.171	156.143	12.2948	-1.02759	85.9498	-0.0718362
14.1793	156.224	12.2943	-1.0269	85.9469	-0.0717881
14.1877	156.313	12.2939	-1.02622	85.9438	-0.0717407
14.196	156.392	12.2935	-1.02552	85.9408	-0.0716917
14.2043	156.481	12.293	-1.02484	85.9375	-0.0716441
14.2127	156.569	12.2925	-1.02417	85.9344	-0.0715976
14.221	156.647	12.2921	-1.02351	85.9311	-0.0715511
14.2293	156.732	12.2917	-1.02282	85.9281	-0.0715029
14.2377	156.812	12.2912	-1.02212	85.9251	-0.0714538
14.246	156.902	12.2908	-1.02145	85.9222	-0.0714075
14.2543	156.987	12.2904	-1.02077	85.9192	-0.0713599
14.2627	157.071	12.2899	-1.02009	85.916	-0.0713123
14.271	157.156	12.2895	-1.01938	85.913	-0.0712627
14.2793	157.239	12.289	-1.01872	85.9099	-0.0712165
14.2877	157.322	12.2886	-1.01805	85.9069	-0.0711694
14.296	157.407	12.2882	-1.01734	85.9039	-0.0711196
14.3043	157.488	12.2878	-1.01661	85.9009	-0.0710691
14.3127	157.576	12.2873	-1.01593	85.8977	-0.0710214
14.321	157.656	12.2869	-1.01524	85.8946	-0.0709731
14.3293	157.744	12.2864	-1.01452	85.8916	-0.0709229
14.3377	157.824	12.286	-1.01385	85.8886	-0.0708757
14.346	157.907	12.2856	-1.0132	85.8858	-0.0708308
14.3543	157.99	12.2852	-1.01255	85.883	-0.0707854
14.3627	158.075	12.2848	-1.01188	85.8801	-0.0707382
14.371	158.161	12.2843	-1.01121	85.877	-0.0706913
14.3793	158.248	12.2839	-1.01056	85.8742	-0.070646
14.3877	158.331	12.2835	-1.00993	85.8712	-0.0706019
14.396	158.415	12.2831	-1.00927	85.8684	-0.0705557
14.4043	158.498	12.2827	-1.0086	85.8655	-0.0705091
14.4127	158.586	12.2822	-1.00793	85.8624	-0.0704623
14.421	158.663	12.2818	-1.00726	85.8592	-0.070415
14.4293	158.752	12.2814	-1.00656	85.8563	-0.0703666
14.4377	158.833	12.2809	-1.0059	85.8531	-0.07032
14.446	158.918	12.2805	-1.00526	85.85	-0.0702755
14.4543	159.002	12.2801	-1.0046	85.8471	-0.0702292
14.4627	159.082	12.2796	-1.00391	85.844	-0.0701814
14.471	159.17	12.2792	-1.00324	85.841	-0.0701344
14.4793	159.255	12.2788	-1.00261	85.838	-0.0700899
14.4877	159.338	12.2783	-1.00195	85.835	-0.0700437
14.496	159.419	12.2779	-1.00131	85.8322	-0.0699997
14.5043	159.505	12.2775	-1.00068	85.8292	-0.0699553
14.5127	159.594	12.277	-1.00003	85.8261	-0.06991
14.521	159.679	12.2766	-0.999418	85.8231	-0.0698671
14.5293	159.762	12.2762	-0.998785	85.8201	-0.0698228
14.5377	159.839	12.2758	-0.998137	85.8171	-0.0697775
14.546	159.928	12.2754	-0.997503	85.8143	-0.0697332
14.5543	160.014	12.2749	-0.996874	85.8112	-0.0696892
14.5627	160.094	12.2745	-0.996236	85.8081	-0.0696446
14.571	160.179	12.2741	-0.995631	85.8053	-0.0696023
14.5793	160.264	12.2737	-0.995029	85.8024	-0.0695602
14.5877	160.347	12.2732	-0.994388	85.7994	-0.0695154
14.596	160.435	12.2728	-0.993749	85.7966	-0.0694707
14.6043	160.519	12.2724	-0.993106	85.7937	-0.0694258
14.6127	160.601	12.272	-0.992459	85.7908	-0.0693806
14.621	160.688	12.2716	-0.991874	85.7878	-0.0693397
14.6293	160.771	12.2712	-0.991264	85.7849	-0.069297
14.6377	160.854	12.2707	-0.990611	85.782	-0.0692513
14.646	160.938	12.2703	-0.989956	85.7792	-0.0692056
14.6543	161.023	12.2699	-0.989317	85.7761	-0.0691609
14.6627	161.108	12.2695	-0.988669	85.7731	-0.0691156
14.671	161.192	12.2691	-0.988019	85.7704	-0.0690701
14.6793	161.272	12.2687	-0.987401	85.7676	-0.069027
14.6877	161.356	12.2683	-0.986787	85.7648	-0.068984
14.696	161.448	12.2679	-0.986154	85.7619	-0.0689398
14.7043	161.527	12.2675	-0.985509	85.7592	-0.0688947
14.7127	161.613	12.2671	-0.984893	85.7565	-0.0688516
14.721	161.695	12.2667	-0.984299	85.7538	-0.0688101
14.7293	161.783	12.2663	-0.983686	85.7511	-0.0687673
14.7377	161.863	12.2659	-0.983044	85.7483	-0.0687224
14.746	161.945	12.2655	-0.982408	85.7453	-0.0686779
14.7543	162.03	12.2651	-0.9818	85.7424	-0.0686354
14.7627	162.113	12.2647	-0.981188	85.7395	-0.0685926
14.771	162.198	12.2643	-0.980554	85.7367	-0.0685483
14.7793	162.28	12.2639	-0.979944	85.7339	-0.0685057
14.7877	162.363	12.2634	-0.97932	85.7308	-0.0684621
14.796	162.447	12.263	-0.978727	85.7277	-0.0684206
14.8043	162.532	12.2626	-0.978111	85.7248	-0.0683775
14.8127	162.614	12.2622	-0.977537	85.7219	-0.0683374
14.821	162.701	12.2618	-0.976977	85.7192	-0.0682983
14.8293	162.786	12.2614	-0.976418	85.7167	-0.0682591
14.8377	162.867	12.261	-0.975848	85.7139	-0.0682193
14.846	162.952	12.2606	-0.975266	85.7112	-0.0681786
14.8543	163.035	12.2602	-0.97469	85.7085	-0.0681384
14.8627	163.12	12.2598	-0.97409	85.7056	-0.0680964
14.871	163.203	12.2594	-0.973489	85.703	-0.0680544
14.8793	163.288	12.259	-0.972857	85.7001	-0.0680102
14.8877	163.371	12.2586	-0.972286	85.6972	-0.0679703
14.896	163.452	12.2582	-0.97167	85.6944	-0.0679273
14.9043	163.536	12.2578	-0.971079	85.6915	-0.0678859
14.9127	163.623	12.2574	-0.970481	85.6887	-0.0678441
14.921	163.709	12.257	-0.969886	85.6858	-0.0678025
14.9293	163.793	12.2566	-0.969293	85.6829	-0.067761
14.9377	163.874	12.2562	-0.968694	85.6801	-0.0677192
14.946	163.961	12.2558	-0.968105	85.6773	-0.067678
14.9543	164.045	12.2554	-0.967549	85.6744	-0.0676392
14.9627	164.131	12.255	-0.967008	85.6716	-0.0676013
14.971	164.214	12.2546	-0.966414	85.6689	-0.0675598
14.9793	164.296	12.2542	-0.965851	85.666	-0.0675204
14.9877	164.38	12.2538	-0.96527	85.6632	-0.0674798
14.996	164.461	12.2534	-0.964711	85.6605	-0.0674408
15.0043	164.544	12.253	-0.964159	85.6577	-0.0674022
15.0127	164.624	12.2526	-0.963582	85.6549	-0.0673618
15.021	164.709	12.2522	-0.963008	85.6521	-0.0673217
15.0293	164.797	12.2518	-0.96245	85.6493	-0.0672827
15.0377	164.88	12.2514	-0.961879	85.6466	-0.0672428
15.046	164.967	12.251	-0.961305	85.6439	-0.0672027
15.0543	165.044	12.2506	-0.960759	85.6411	-0.0671645
15.0627	165.131	12.2502	-0.960204	85.6386	-0.0671257
15.071	165.216	12.2499	-0.959646	85.636	-0.0670867
15.0793	165.303	12.2495	-0.959061	85.6334	-0.0670458
15.0877	165.385	12.2491	-0.958491	85.6308	-0.0670059
15.096	165.47	12.2487	-0.957924	85.6282	-0.0669663
15.1043	165.551	12.2483	-0.957355	85.6254	-0.0669265
15.1127	165.638	12.2479	-0.956825	85.6226	-0.0668894
15.121	165.723	12.2476	-0.956262	85.6198	-0.0668501
15.1293	165.805	12.2472	-0.955693	85.6172	-0.0668103
15.1377	165.887	12.2468	-0.955145	85.6147	-0.066772
15.146	165.974	12.2464	-0.954601	85.6118	-0.066734
15.1543	166.052	12.246	-0.954048	85.6091	-0.0666953
15.1627	166.141	12.2456	-0.95349	85.6062	-0.0666563
15.171	166.222	12.2452	-0.952933	85.6036	-0.0666174
15.1793	166.306	12.2448	-0.952408	85.6008	-0.0665807
15.1877	166.396	12.2445	-0.951891	85.5982	-0.0665445
15.196	166.474	12.2441	-0.95134	85.5957	-0.066506
15.2043	166.558	12.2437	-0.950794	85.5931	-0.0664679
15.2127	166.641	12.2434	-0.950254	85.5905	-0.0664301
15.221	166.728	12.243	-0.949691	85.5879	-0.0663907
15.2293	166.809	12.2426	-0.94914	85.5854	-0.0663522
15.2377	166.893	12.2422	-0.948596	85.5826	-0.0663142
15.246	166.979	12.2419	-0.948057	85.5801	-0.0662765
15.2543	167.065	12.2415	-0.947526	85.5773	-0.0662394
15.2627	167.147	12.2411	-0.946976	85.5746	-0.0662009
15.271	167.23	12.2407	-0.946438	85.5721	-0.0661633
15.2793	167.315	12.2403	-0.945898	85.5694	-0.0661256
15.2877	167.399	12.2399	-0.945354	85.5665	-0.0660875
15.296	167.485	12.2395	-0.944837	85.5638	-0.0660514
15.3043	167.564	12.2391	-0.944327	85.5609	-0.0660158
15.3127	167.649	12.2387	-0.943787	85.5581	-0.065978
15.321	167.735	12.2384	-0.943268	85.5556	-0.0659417
15.3293	167.82	12.238	-0.942774	85.5528	-0.0659072
15.3377	167.902	12.2376	-0.942234	85.5502	-0.0658694
15.346	167.987	12.2372	-0.941699	85.5476	-0.065832
15.3543	168.071	12.2368	-0.941158	85.5448	-0.0657942
15.3627	168.154	12.2364	-0.940628	85.5421	-0.0657572
15.371	168.237	12.236	-0.940138	85.5394	-0.0657229
15.3793	168.318	12.2357	-0.939589	85.5368	-0.0656845
15.3877	168.399	12.2353	-0.939065	85.5343	-0.0656479
15.396	168.486	12.2349	-0.938544	85.5317	-0.0656115
15.4043	168.573	12.2346	-0.938013	85.5291	-0.0655743
15.4127	168.653	12.2342	-0.93745	85.5267	-0.065535
15.421	168.739	12.2339	-0.936961	85.5241	-0.0655008
15.4293	168.83	12.2335	-0.936461	85.5216	-0.0654659
15.4377	168.913	12.2331	-0.935957	85.519	-0.0654306
15.446	168.995	12.2328	-0.935448	85.5164	-0.0653951
15.4543	169.077	12.2324	-0.934917	85.5141	-0.0653579
15.4627	169.165	12.2321	-0.934387	85.5116	-0.0653209
15.471	169.246	12.2317	-0.93384	85.509	-0.0652826
15.4793	169.33	12.2313	-0.933318	85.5065	-0.0652461
15.4877	169.413	12.2309	-0.932793	85.5037	-0.0652095
15.496	169.491	12.2306	-0.932277	85.5011	-0.0651734
15.5043	169.58	12.2302	-0.931728	85.4983	-0.065135
15.5127	169.662	12.2298	-0.93122	85.4956	-0.0650995
15.521	169.748	12.2294	-0.930697	85.4933	-0.0650629
15.5293	169.826	12.2291	-0.930167	85.4908	-0.0650259
15.5377	169.917	12.2287	-0.929656	85.4881	-0.0649901
15.546	169.997	12.2284	-0.929161	85.4857	-0.0649555
15.5543	170.082	12.228	-0.92865	85.4832	-0.0649198
15.5627	170.165	12.2277	-0.928156	85.4807	-0.0648853
15.571	170.25	12.2273	-0.927688	85.4781	-0.0648525
15.5793	170.338	12.2269	-0.927211	85.4757	-0.0648192
15.5877	170.42	12.2266	-0.926734	85.4732	-0.0647859
15.596	170.504	12.2262	-0.926204	85.4706	-0.0647488
15.6043	170.588	12.2258	-0.925713	85.4679	-0.0647145
15.6127	170.673	12.2254	-0.925233	85.4652	-0.0646809
15.621	170.756	12.225	-0.924728	85.4625	-0.0646456
15.6293	170.844	12.2247	-0.924233	85.4598	-0.064611
15.6377	170.924	12.2242	-0.923755	85.4568	-0.0645776
15.646	171.006	12.2238	-0.923247	85.4541	-0.0645421
15.6543	171.089	12.2235	-0.922721	85.4517	-0.0645053
15.6627	171.177	12.2232	-0.922229	85.4494	-0.0644709
15.671	171.257	12.2228	-0.921747	85.4471	-0.0644372
15.6793	171.339	12.2225	-0.921269	85.4448	-0.0644038
15.6877	171.423	12.2222	-0.920783	85.4425	-0.0643699
15.696	171.509	12.2218	-0.920286	85.4401	-0.0643351
15.7043	171.595	12.2215	-0.919801	85.4378	-0.0643012
15.7127	171.679	12.2212	-0.919327	85.4356	-0.0642681
15.721	171.762	12.2209	-0.918859	85.4333	-0.0642353
15.7293	171.843	12.2205	-0.918344	85.4309	-0.0641993
15.7377	171.929	12.2202	-0.917836	85.4284	-0.0641638
15.746	172.013	12.2198	-0.917322	85.4256	-0.0641279
15.7543	172.097	12.2194	-0.916829	85.4231	-0.0640934
15.7627	172.182	12.219	-0.916337	85.4205	-0.064059
15.771	172.264	12.2187	-0.915843	85.4178	-0.0640245
15.7793	172.351	12.2183	-0.915359	85.4153	-0.0639907
15.7877	172.432	12.2179	-0.914903	85.4128	-0.0639588
15.796	172.516	12.2176	-0.914406	85.4104	-0.0639241
15.8043	172.602	12.2172	-0.913896	85.408	-0.0638884
15.8127	172.684	12.2169	-0.913443	85.4056	-0.0638568
15.821	172.766	12.2166	-0.912979	85.4032	-0.0638243
15.8293	172.855	12.2162	-0.912532	85.4007	-0.063793
15.8377	172.942	12.2158	-0.912001	85.398	-0.0637559
15.846	173.019	12.2155	-0.911499	85.3955	-0.0637208
15.8543	173.104	12.2151	-0.910979	85.3931	-0.0636845
15.8627	173.191	12.2148	-0.910458	85.3908	-0.063648
15.871	173.27	12.2144	-0.909927	85.3882	-0.0636109
15.8793	173.351	12.2141	-0.909446	85.3858	-0.0635773
15.8877	173.439	12.2137	-0.908962	85.3833	-0.0635435
15.896	173.521	12.2133	-0.908473	85.3807	-0.0635092
15.9043	173.608	12.213	-0.908011	85.3781	-0.063477
15.9127	173.687	12.2126	-0.907516	85.3755	-0.0634424
15.921	173.771	12.2122	-0.907061	85.3731	-0.0634106
15.9293	173.858	12.2119	-0.906608	85.3708	-0.0633789
15.9377	173.941	12.2116	-0.906166	85.3686	-0.063348
15.946	174.022	12.2113	-0.905731	85.3663	-0.0633176
15.9543	174.109	12.211	-0.905287	85.364	-0.0632866
15.9627	174.194	12.2106	-0.904818	85.3614	-0.0632538
15.971	174.276	12.2102	-0.904363	85.3589	-0.063222
15.9793	174.358	12.2099	-0.903907	85.3566	-0.0631901
15.9877	174.445	12.2096	-0.903436	85.3543	-0.0631572
15.996	174.525	12.2093	-0.90298	85.3521	-0.0631253
16.0043	174.612	12.2089	-0.902524	85.3497	-0.0630934
16.0127	174.694	12.2085	-0.902066	85.3471	-0.0630614
16.021	174.776	12.2082	-0.901633	85.3445	-0.0630311
16.0293	174.861	12.2078	-0.901179	85.3419	-0.0629994
16.0377	174.942	12.2074	-0.900722	85.3392	-0.0629674
16.046	175.027	12.2071	-0.900276	85.3368	-0.0629362
16.0543	175.114	12.2067	-0.899811	85.3345	-0.0629037
16.0627	175.196	12.2064	-0.899347	85.3322	-0.0628713
16.071	175.28	12.206	-0.898879	85.3294	-0.0628386
16.0793	175.358	12.2056	-0.898431	85.3268	-0.0628073
16.0877	175.445	12.2053	-0.897994	85.3243	-0.0627767
16.096	175.53	12.2049	-0.89756	85.3217	-0.0627464
16.1043	175.614	12.2045	-0.897109	85.3192	-0.0627148
16.1127	175.696	12.2042	-0.89667	85.3169	-0.0626842
16.121	175.781	12.2039	-0.896237	85.3146	-0.0626539
16.1293	175.861	12.2036	-0.895806	85.3123	-0.0626238
16.1377	175.949	12.2032	-0.895366	85.3099	-0.062593
16.146	176.032	12.2029	-0.894939	85.3076	-0.0625632
16.1543	176.117	12.2026	-0.894493	85.3053	-0.062532
16.1627	176.196	12.2023	-0.894066	85.3032	-0.0625021
16.171	176.28	12.202	-0.893638	85.3011	-0.0624722
16.1793	176.365	12.2017	-0.893199	85.299	-0.0624415
16.1877	176.449	12.2013	-0.892738	85.2967	-0.0624093
16.196	176.531	12.201	-0.892267	85.2944	-0.0623764
16.2043	176.616	12.2007	-0.891817	85.2921	-0.0623449
16.2127	176.705	12.2003	-0.891382	85.2895	-0.0623145
16.221	176.792	12.1999	-0.890958	85.2871	-0.0622849
16.2293	176.872	12.1996	-0.890509	85.2847	-0.0622535
16.2377	176.96	12.1993	-0.890078	85.2827	-0.0622234
16.246	177.038	12.199	-0.889629	85.2803	-0.0621919
16.2543	177.128	12.1986	-0.889186	85.2779	-0.062161
16.2627	177.207	12.1983	-0.888736	85.2757	-0.0621295
16.271	177.29	12.198	-0.888303	85.2733	-0.0620993
16.2793	177.374	12.1977	-0.887882	85.2711	-0.0620698
16.2877	177.46	12.1974	-0.887418	85.2689	-0.0620373
16.296	177.544	12.1971	-0.88697	85.2668	-0.0620061
16.3043	177.631	12.1967	-0.886531	85.2644	-0.0619754
16.3127	177.709	12.1963	-0.886102	85.2618	-0.0619454
16.321	177.794	12.196	-0.885686	85.2592	-0.0619163
16.3293	177.88	12.1956	-0.885261	85.2567	-0.0618866
16.3377	177.968	12.1953	-0.884819	85.2544	-0.0618557
16.346	178.047	12.1949	-0.884387	85.2519	-0.0618255
16.3543	178.135	12.1946	-0.883964	85.2494	-0.0617959
16.3627	178.216	12.1942	-0.88354	85.2469	-0.0617663
16.371	178.301	12.1938	-0.883134	85.2443	-0.0617379
16.3793	178.385	12.1935	-0.882717	85.2419	-0.0617087
16.3877	178.468	12.1932	-0.882311	85.2397	-0.0616804
16.396	178.55	12.1929	-0.88191	85.2377	-0.0616523
16.4043	178.642	12.1926	-0.88147	85.2356	-0.0616216
16.4127	178.718	12.1922	-0.881035	85.2332	-0.0615911
16.421	178.806	12.1919	-0.880616	85.2308	-0.0615619
16.4293	178.883	12.1916	-0.8802	85.2286	-0.0615328
16.4377	178.971	12.1913	-0.879768	85.2266	-0.0615026
16.446	179.058	12.191	-0.879346	85.2245	-0.0614731
16.4543	179.144	12.1907	-0.878936	85.2223	-0.0614444
16.4627	179.222	12.1903	-0.878481	85.2199	-0.0614126
16.471	179.311	12.19	-0.878026	85.2174	-0.0613808
16.4793	179.392	12.1896	-0.877586	85.2148	-0.06135
16.4877	179.479	12.1893	-0.877179	85.2125	-0.0613216
16.496	179.555	12.189	-0.876764	85.2104	-0.0612926
16.5043	179.641	12.1887	-0.876359	85.2082	-0.0612643
16.5127	179.72	12.1883	-0.875966	85.2058	-0.0612368
16.521	179.813	12.188	-0.875559	85.2036	-0.0612084
16.5293	179.891	12.1877	-0.875178	85.2012	-0.0611817
16.5377	179.978	12.1873	-0.874762	85.1989	-0.0611526
16.546	180.06	12.187	-0.874388	85.1968	-0.0611265
16.5543	180.143	12.1867	-0.87401	85.1946	-0.0611001
16.5627	180.228	12.1864	-0.873617	85.1924	-0.0610726
16.571	180.314	12.1861	-0.873203	85.19	-0.0610437
16.5793	180.392	12.1858	-0.872797	85.1878	-0.0610152
16.5877	180.479	12.1854	-0.872384	85.1854	-0.0609864
16.596	180.56	12.1851	-0.871982	85.1831	-0.0609583
16.6043	180.646	12.1847	-0.871568	85.1807	-0.0609294
16.6127	180.728	12.1844	-0.871128	85.1784	-0.0608986
16.621	180.811	12.1841	-0.870744	85.1762	-0.0608717
16.6293	180.895	12.1838	-0.870351	85.174	-0.0608443
16.6377	180.981	12.1835	-0.869968	85.1718	-0.0608175
16.646	181.059	12.1831	-0.869582	85.1696	-0.0607905
[truncated: 9,870 more rows]
