# Supplementary material for: Comparative study on mechanisms for improving mechanical properties and microstructure of cement paste modified by different types of nanomaterials
Source: publisher site journal article supplement (doi:10.1515/ntrev-2021-0027), 2021-01-01
Supplement: Supplementary file 6 [file N-0-7d.xlsx]

## Sheet: Sheet1
Time (min)	Temperature (°C)	Weight (mg)			Temperature Difference (°C/mg)
0.00113333	19.4552	13.3409	-0.457018	100	-0.0342569
0.00433333	19.4469	13.3405	-0.461686	99.9973	-0.0346068
0.0126667	19.4614	13.3401	-0.461997	99.9939	-0.0346301
0.021	19.452	13.3396	-0.462522	99.9903	-0.0346695
0.0293333	19.448	13.3391	-0.463224	99.9867	-0.0347221
0.0376667	19.4461	13.3387	-0.46415	99.9832	-0.0347915
0.046	19.433	13.3382	-0.465308	99.9795	-0.0348783
0.0543333	19.437	13.3377	-0.466644	99.9761	-0.0349785
0.0626667	19.4368	13.3372	-0.468225	99.9722	-0.0350969
0.071	19.4407	13.3367	-0.469972	99.9685	-0.0352279
0.0793333	19.4315	13.3362	-0.471937	99.9648	-0.0353752
0.0876667	19.4309	13.3357	-0.474056	99.9611	-0.035534
0.096	19.4287	13.3352	-0.47615	99.9575	-0.035691
0.104333	19.4255	13.3347	-0.478228	99.9535	-0.0358468
0.112667	19.4313	13.3342	-0.480318	99.9499	-0.0360034
0.121	19.424	13.3337	-0.482412	99.9459	-0.0361604
0.129333	19.423	13.3332	-0.484473	99.942	-0.0363148
0.137667	19.4102	13.3327	-0.486562	99.9383	-0.0364714
0.146	19.4182	13.3322	-0.488629	99.9345	-0.0366264
0.154333	19.4128	13.3317	-0.490708	99.9307	-0.0367822
0.162667	19.4187	13.3311	-0.492815	99.9268	-0.0369402
0.171	19.4062	13.3306	-0.494871	99.9227	-0.0370942
0.179333	19.4075	13.3301	-0.49691	99.9189	-0.0372471
0.187667	19.4102	13.3296	-0.498944	99.9152	-0.0373996
0.196	19.4201	13.3291	-0.501014	99.9115	-0.0375547
0.204333	19.4143	13.3286	-0.503067	99.9078	-0.0377087
0.212667	19.4177	13.3281	-0.505143	99.9038	-0.0378643
0.221	19.4156	13.3275	-0.507207	99.8997	-0.0380189
0.229333	19.4197	13.327	-0.509247	99.8957	-0.0381719
0.237667	19.415	13.3264	-0.511343	99.8916	-0.038329
0.246	19.4182	13.3259	-0.513401	99.8879	-0.0384832
0.254333	19.4205	13.3254	-0.515537	99.8838	-0.0386433
0.262667	19.4221	13.3248	-0.517673	99.8797	-0.0388034
0.271	19.4276	13.3243	-0.519794	99.8754	-0.0389625
0.279333	19.4226	13.3237	-0.521922	99.8711	-0.0391219
0.287667	19.4268	13.3231	-0.524082	99.8669	-0.0392839
0.296	19.4379	13.3226	-0.526262	99.8628	-0.0394472
0.304333	19.4348	13.3221	-0.528415	99.8587	-0.0396086
0.312667	19.4431	13.3215	-0.530595	99.8546	-0.0397721
0.321	19.4543	13.321	-0.532764	99.8505	-0.0399346
0.329333	19.4541	13.3204	-0.534933	99.8465	-0.0400972
0.337667	19.462	13.3199	-0.537082	99.8424	-0.0402583
0.346	19.4669	13.3193	-0.539246	99.8383	-0.0404205
0.354333	19.4743	13.3188	-0.541481	99.8341	-0.0405881
0.362667	19.4812	13.3182	-0.543708	99.8299	-0.040755
0.371	19.4869	13.3177	-0.545912	99.8261	-0.0409202
0.379333	19.4954	13.3172	-0.548058	99.8222	-0.041081
0.387667	19.5021	13.3167	-0.550331	99.8184	-0.0412514
0.396	19.5168	13.3161	-0.552603	99.8144	-0.0414217
0.404333	19.5223	13.3156	-0.554908	99.8104	-0.0415945
0.412667	19.5386	13.3151	-0.557214	99.8063	-0.0417674
0.421	19.5497	13.3145	-0.559559	99.8024	-0.0419431
0.429333	19.5499	13.314	-0.561923	99.7987	-0.0421203
0.437667	19.5662	13.3136	-0.564265	99.7951	-0.0422959
0.446	19.5788	13.313	-0.56664	99.791	-0.0424739
0.454333	19.5924	13.3125	-0.569053	99.7868	-0.0426547
0.462667	19.604	13.3119	-0.57149	99.7826	-0.0428375
0.471	19.6273	13.3114	-0.573915	99.7787	-0.0430192
0.479333	19.6426	13.3109	-0.576361	99.775	-0.0432026
0.487667	19.656	13.3104	-0.578832	99.7712	-0.0433877
0.496	19.6754	13.3099	-0.581349	99.7676	-0.0435765
0.504333	19.6875	13.3094	-0.583816	99.7636	-0.0437613
0.512667	19.7068	13.3088	-0.58627	99.7593	-0.0439453
0.521	19.727	13.3082	-0.588756	99.7552	-0.0441316
0.529333	19.7425	13.3077	-0.591251	99.7513	-0.0443187
0.537667	19.7632	13.3072	-0.593763	99.7475	-0.044507
0.546	19.7773	13.3067	-0.59629	99.7436	-0.0446964
0.554333	19.8012	13.3061	-0.598782	99.7394	-0.0448832
0.562667	19.8283	13.3056	-0.601324	99.7352	-0.0450737
0.571	19.8441	13.305	-0.603867	99.7308	-0.0452643
0.579333	19.867	13.3044	-0.606451	99.7264	-0.045458
0.587667	19.8957	13.3038	-0.609066	99.722	-0.045654
0.596	19.922	13.3032	-0.611724	99.7177	-0.0458533
0.604333	19.9504	13.3026	-0.614362	99.7132	-0.046051
0.612667	19.974	13.3021	-0.617017	99.7089	-0.04625
0.621	20.0019	13.3015	-0.619663	99.7046	-0.0464484
0.629333	20.031	13.3009	-0.62235	99.7002	-0.0466498
0.637667	20.0555	13.3003	-0.625083	99.6957	-0.0468546
0.646	20.0811	13.2997	-0.627767	99.6915	-0.0470558
0.654333	20.1183	13.2992	-0.630428	99.6871	-0.0472553
0.662667	20.148	13.2986	-0.633083	99.683	-0.0474543
0.671	20.1817	13.2981	-0.635722	99.679	-0.0476521
0.679333	20.2099	13.2975	-0.638363	99.6747	-0.0478501
0.687667	20.2509	13.297	-0.641002	99.6706	-0.0480479
0.696	20.2779	13.2964	-0.643682	99.6662	-0.0482487
0.704333	20.3149	13.2958	-0.64637	99.6619	-0.0484503
0.712667	20.3487	13.2952	-0.649074	99.6576	-0.048653
0.721	20.3888	13.2947	-0.651745	99.6534	-0.0488531
0.729333	20.4205	13.2941	-0.654444	99.6492	-0.0490554
0.737667	20.4582	13.2935	-0.657154	99.6448	-0.0492586
0.746	20.498	13.2929	-0.659856	99.6403	-0.0494611
0.754333	20.542	13.2923	-0.662605	99.6357	-0.0496672
0.762667	20.5775	13.2917	-0.665343	99.6313	-0.0498724
0.771	20.6188	13.2911	-0.668125	99.6269	-0.050081
0.779333	20.6614	13.2905	-0.670869	99.6226	-0.0502867
0.787667	20.6959	13.2899	-0.673603	99.6181	-0.0504915
0.796	20.7381	13.2894	-0.676361	99.6138	-0.0506983
0.804333	20.7844	13.2888	-0.679148	99.6094	-0.0509072
0.812667	20.8309	13.2882	-0.681948	99.6048	-0.0511171
0.821	20.8735	13.2876	-0.684755	99.6005	-0.0513275
0.829333	20.9161	13.287	-0.687553	99.5961	-0.0515373
0.837667	20.9629	13.2865	-0.690319	99.5919	-0.0517446
0.846	21.0175	13.2859	-0.693105	99.5877	-0.0519534
0.854333	21.0601	13.2853	-0.695918	99.5832	-0.0521642
0.862667	21.1086	13.2847	-0.69871	99.5786	-0.0523735
0.871	21.157	13.2841	-0.701517	99.5741	-0.0525839
0.879333	21.2118	13.2835	-0.704299	99.5694	-0.0527925
0.887667	21.2567	13.2828	-0.707063	99.5649	-0.0529996
0.896	21.3144	13.2822	-0.709835	99.5604	-0.0532074
0.904333	21.3725	13.2816	-0.712627	99.5558	-0.0534167
0.912667	21.4216	13.281	-0.715434	99.551	-0.0536271
0.921	21.4742	13.2803	-0.718307	99.5461	-0.0538425
0.929333	21.5385	13.2797	-0.721141	99.541	-0.0540549
0.937667	21.594	13.279	-0.723931	99.5362	-0.054264
0.946	21.6451	13.2784	-0.726742	99.5317	-0.0544747
0.954333	21.6997	13.2778	-0.729543	99.527	-0.0546847
0.962667	21.7621	13.2772	-0.732339	99.5223	-0.0548942
0.971	21.8195	13.2765	-0.735238	99.5175	-0.0551116
0.979333	21.8782	13.2759	-0.738094	99.5126	-0.0553256
0.987667	21.942	13.2752	-0.740973	99.5075	-0.0555414
0.996	22.0013	13.2745	-0.743834	99.5024	-0.0557559
1.00433	22.0607	13.2739	-0.746664	99.4977	-0.055968
1.01267	22.1196	13.2732	-0.749528	99.4928	-0.0561827
1.021	22.1834	13.2726	-0.752412	99.4878	-0.0563989
1.02933	22.2528	13.2719	-0.755319	99.4825	-0.0566168
1.03767	22.3102	13.2712	-0.758226	99.4772	-0.0568347
1.046	22.379	13.2705	-0.761167	99.4722	-0.0570551
1.05433	22.4462	13.2698	-0.763983	99.4672	-0.0572662
1.06267	22.5101	13.2691	-0.766836	99.462	-0.0574801
1.071	22.5712	13.2684	-0.769679	99.4567	-0.0576932
1.07933	22.6453	13.2677	-0.772559	99.4516	-0.057909
1.08767	22.7126	13.2671	-0.77545	99.4465	-0.0581258
1.096	22.7855	13.2664	-0.778355	99.4413	-0.0583435
1.10433	22.851	13.2657	-0.781276	99.4362	-0.0585625
1.11267	22.9253	13.265	-0.784221	99.4313	-0.0587832
1.121	22.9886	13.2644	-0.787126	99.4262	-0.059001
1.12933	23.0681	13.2637	-0.790014	99.421	-0.0592174
1.13767	23.1315	13.2629	-0.792931	99.4156	-0.0594361
1.146	23.2035	13.2622	-0.79587	99.4104	-0.0596564
1.15433	23.2748	13.2616	-0.7988	99.4055	-0.059876
1.16267	23.3544	13.261	-0.801697	99.4008	-0.0600932
1.171	23.4215	13.2603	-0.804623	99.3955	-0.0603125
1.17933	23.5055	13.2596	-0.807534	99.3905	-0.0605307
1.18767	23.577	13.2589	-0.810446	99.3855	-0.060749
1.196	23.6543	13.2582	-0.813329	99.3803	-0.0609651
1.20433	23.7284	13.2576	-0.816273	99.3755	-0.0611857
1.21267	23.8037	13.2569	-0.819184	99.3703	-0.0614039
1.221	23.8798	13.2562	-0.822121	99.3654	-0.0616241
1.22933	23.9578	13.2556	-0.82507	99.3604	-0.0618452
1.23767	24.0382	13.2549	-0.828014	99.3551	-0.0620658
1.246	24.1144	13.2541	-0.830986	99.3497	-0.0622886
1.25433	24.1921	13.2534	-0.83394	99.3443	-0.06251
1.26267	24.2709	13.2527	-0.836915	99.339	-0.062733
1.271	24.3577	13.252	-0.839873	99.3336	-0.0629547
1.27933	24.4438	13.2513	-0.842851	99.3281	-0.063178
1.28767	24.5177	13.2505	-0.845833	99.3222	-0.0634015
1.296	24.6021	13.2497	-0.848856	99.3165	-0.0636281
1.30433	24.6853	13.2489	-0.851845	99.3107	-0.0638521
1.31267	24.7644	13.2482	-0.854793	99.3048	-0.0640731
1.321	24.8442	13.2474	-0.857748	99.2992	-0.0642946
1.32933	24.9314	13.2467	-0.860707	99.2936	-0.0645164
1.33767	25.0179	13.2459	-0.86371	99.2879	-0.0647415
1.346	25.1032	13.2451	-0.86667	99.282	-0.0649634
1.35433	25.1868	13.2443	-0.869676	99.2759	-0.0651887
1.36267	25.2707	13.2435	-0.872632	99.2698	-0.0654103
1.371	25.3596	13.2427	-0.875586	99.2641	-0.0656317
1.37933	25.4464	13.242	-0.878547	99.2584	-0.0658536
1.38767	25.5302	13.2412	-0.88153	99.2526	-0.0660773
1.396	25.6259	13.2404	-0.884507	99.2467	-0.0663004
1.40433	25.706	13.2395	-0.887527	99.2403	-0.0665268
1.41267	25.7947	13.2387	-0.890556	99.2342	-0.0667538
1.421	25.8862	13.2379	-0.893537	99.228	-0.0669773
1.42933	25.9656	13.2372	-0.896556	99.2225	-0.0672036
1.43767	26.0523	13.2364	-0.899531	99.2168	-0.0674265
1.446	26.1482	13.2357	-0.902558	99.2111	-0.0676534
1.45433	26.2354	13.2348	-0.905612	99.205	-0.0678824
1.46267	26.3253	13.234	-0.908686	99.1986	-0.0681128
1.471	26.4156	13.2331	-0.911757	99.1923	-0.068343
1.47933	26.5048	13.2323	-0.914815	99.1863	-0.0685722
1.48767	26.5949	13.2316	-0.917871	99.1804	-0.0688013
1.496	26.688	13.2308	-0.920892	99.1745	-0.0690277
1.50433	26.7795	13.23	-0.923948	99.1684	-0.0692568
1.51267	26.8755	13.2291	-0.927033	99.1619	-0.069488
1.521	26.9598	13.2282	-0.930134	99.1554	-0.0697205
1.52933	27.0548	13.2274	-0.933213	99.1491	-0.0699513
1.53767	27.1503	13.2266	-0.936257	99.143	-0.0701794
1.546	27.241	13.2258	-0.939262	99.1372	-0.0704047
1.55433	27.3307	13.225	-0.942294	99.1311	-0.070632
1.56267	27.4303	13.2241	-0.94538	99.1246	-0.0708633
1.571	27.5189	13.2232	-0.948425	99.1179	-0.0710915
1.57933	27.6097	13.2223	-0.951488	99.1112	-0.0713211
1.58767	27.71	13.2215	-0.954548	99.1047	-0.0715505
1.596	27.8005	13.2206	-0.957572	99.0983	-0.0717772
1.60433	27.8976	13.2198	-0.960645	99.0922	-0.0720075
1.61267	27.991	13.2189	-0.963746	99.0858	-0.0722399
1.621	28.0874	13.2181	-0.966831	99.0794	-0.0724712
1.62933	28.1812	13.2172	-0.969975	99.0726	-0.0727069
1.63767	28.2739	13.2163	-0.973114	99.0659	-0.0729422
1.646	28.3749	13.2154	-0.976207	99.0594	-0.073174
1.65433	28.4682	13.2146	-0.979318	99.053	-0.0734072
1.66267	28.552	13.2137	-0.982432	99.0464	-0.0736406
1.671	28.6585	13.2128	-0.985548	99.0398	-0.0738742
1.67933	28.753	13.2119	-0.98871	99.033	-0.0741112
1.68767	28.8537	13.211	-0.991819	99.026	-0.0743443
1.696	28.9478	13.21	-0.994862	99.019	-0.0745723
1.70433	29.0394	13.2091	-0.997994	99.0119	-0.0748071
1.71267	29.1413	13.2081	-1.00107	99.0049	-0.0750376
1.721	29.2372	13.2072	-1.00415	98.998	-0.0752684
1.72933	29.3302	13.2063	-1.00731	98.9911	-0.0755052
1.73767	29.4272	13.2054	-1.01044	98.9841	-0.0757399
1.746	29.5288	13.2044	-1.01354	98.9771	-0.0759728
1.75433	29.6241	13.2035	-1.01665	98.9699	-0.0762052
1.76267	29.7199	13.2025	-1.01972	98.9624	-0.0764356
1.771	29.8184	13.2015	-1.02281	98.9548	-0.0766672
1.77933	29.9152	13.2004	-1.02594	98.9471	-0.0769017
1.78767	30.016	13.1995	-1.02901	98.94	-0.0771317
1.796	30.1102	13.1985	-1.03215	98.9328	-0.0773671
1.80433	30.2073	13.1975	-1.03524	98.9253	-0.0775993
1.81267	30.3036	13.1966	-1.03833	98.918	-0.0778306
1.821	30.4042	13.1955	-1.04141	98.9104	-0.0780612
1.82933	30.4974	13.1945	-1.04454	98.9028	-0.0782964
1.83767	30.589	13.1935	-1.04768	98.8951	-0.0785312
1.846	30.6964	13.1925	-1.05082	98.8879	-0.0787669
1.85433	30.7939	13.1916	-1.05396	98.8808	-0.0790019
1.86267	30.8828	13.1906	-1.0571	98.8738	-0.0792378
1.871	30.9838	13.1897	-1.06024	98.8665	-0.0794731
1.87933	31.0873	13.1887	-1.06333	98.8591	-0.0797047
1.88767	31.184	13.1877	-1.06648	98.8518	-0.0799406
1.896	31.2782	13.1867	-1.06958	98.8443	-0.0801728
1.90433	31.3743	13.1857	-1.07271	98.837	-0.0804078
1.91267	31.4723	13.1847	-1.07581	98.8294	-0.0806399
1.921	31.5687	13.1837	-1.07892	98.822	-0.0808733
1.92933	31.6657	13.1827	-1.08204	98.8145	-0.0811073
1.93767	31.7652	13.1817	-1.08515	98.8071	-0.08134
1.946	31.863	13.1807	-1.08824	98.7993	-0.0815721
1.95433	31.959	13.1797	-1.09139	98.7914	-0.0818078
1.96267	32.0619	13.1786	-1.09455	98.7835	-0.0820448
1.971	32.1575	13.1776	-1.09772	98.7757	-0.0822821
1.97933	32.2506	13.1765	-1.10088	98.7677	-0.0825193
1.98767	32.3536	13.1754	-1.10404	98.7596	-0.082756
1.996	32.4534	13.1743	-1.1072	98.7515	-0.0829926
2.00433	32.5503	13.1733	-1.11034	98.7435	-0.0832286
2.01267	32.6476	13.1722	-1.11346	98.7353	-0.0834624
2.021	32.7419	13.171	-1.1166	98.7268	-0.0836978
2.02933	32.8344	13.1699	-1.11974	98.7185	-0.0839332
2.03767	32.9324	13.1688	-1.12285	98.7102	-0.0841661
2.046	33.0336	13.1677	-1.12596	98.702	-0.084399
2.05433	33.1342	13.1666	-1.12907	98.6935	-0.084632
2.06267	33.2216	13.1655	-1.13218	98.6852	-0.0848654
2.071	33.3212	13.1644	-1.13528	98.677	-0.0850976
2.07933	33.4185	13.1633	-1.13841	98.6688	-0.0853323
2.08767	33.515	13.1622	-1.14157	98.6602	-0.085569
2.096	33.6103	13.161	-1.14471	98.6517	-0.0858044
2.10433	33.7133	13.1599	-1.14781	98.6431	-0.0860368
2.11267	33.8057	13.1587	-1.15091	98.6346	-0.0862693
2.121	33.9066	13.1576	-1.15404	98.6257	-0.0865039
2.12933	33.9957	13.1564	-1.15716	98.617	-0.0867375
2.13767	34.0906	13.1553	-1.16024	98.6086	-0.0869686
2.146	34.1867	13.1541	-1.16337	98.5999	-0.0872032
2.15433	34.2848	13.153	-1.1665	98.5912	-0.0874376
2.16267	34.3826	13.1518	-1.1696	98.5826	-0.0876705
2.171	34.4806	13.1507	-1.17263	98.5742	-0.0878974
2.17933	34.5776	13.1495	-1.17573	98.5656	-0.0881297
2.18767	34.672	13.1484	-1.17881	98.5569	-0.0883608
2.196	34.7621	13.1472	-1.18192	98.5482	-0.088594
2.20433	34.8635	13.146	-1.18502	98.5394	-0.0888262
2.21267	34.9576	13.1448	-1.18813	98.5302	-0.089059
2.221	35.0437	13.1436	-1.19121	98.5208	-0.0892901
2.22933	35.1434	13.1424	-1.19423	98.5118	-0.0895162
2.23767	35.2429	13.1412	-1.19729	98.5028	-0.0897462
2.246	35.3391	13.14	-1.20037	98.494	-0.0899765
2.25433	35.4297	13.1388	-1.20347	98.485	-0.0902093
2.26267	35.5269	13.1376	-1.20653	98.4761	-0.0904387
2.271	35.6186	13.1364	-1.20965	98.4673	-0.0906727
2.27933	35.7163	13.1353	-1.21274	98.4586	-0.0909039
2.28767	35.8044	13.1341	-1.21579	98.4498	-0.0911325
2.296	35.8977	13.1329	-1.21881	98.4411	-0.0913591
2.30433	35.9963	13.1318	-1.22187	98.4325	-0.0915883
2.31267	36.0887	13.1306	-1.22497	98.4235	-0.0918209
2.321	36.1838	13.1293	-1.22801	98.4142	-0.0920483
2.32933	36.2745	13.1281	-1.23103	98.4048	-0.0922747
2.33767	36.3687	13.1268	-1.23404	98.3953	-0.0925006
2.346	36.4663	13.1256	-1.23706	98.3859	-0.092727
2.35433	36.5596	13.1243	-1.24003	98.3762	-0.0929493
2.36267	36.6479	13.123	-1.24301	98.3664	-0.0931729
2.371	36.7413	13.1217	-1.24603	98.3568	-0.0933994
2.37933	36.8313	13.1204	-1.24906	98.3471	-0.0936262
2.38767	36.9256	13.1191	-1.25207	98.3373	-0.0938517
2.396	37.0169	13.1178	-1.25502	98.3275	-0.0940733
2.40433	37.1118	13.1165	-1.258	98.318	-0.0942963
2.41267	37.2018	13.1152	-1.26098	98.3082	-0.0945197
2.421	37.2971	13.1139	-1.26395	98.2983	-0.0947425
2.42933	37.3805	13.1125	-1.26691	98.2883	-0.0949641
2.43767	37.4724	13.1112	-1.2699	98.2785	-0.0951888
2.446	37.5647	13.11	-1.27286	98.2689	-0.0954102
2.45433	37.6575	13.1087	-1.27577	98.2594	-0.0956285
2.46267	37.7527	13.1074	-1.27869	98.25	-0.095847
2.471	37.8366	13.1062	-1.28159	98.2407	-0.0960647
2.47933	37.9251	13.1049	-1.28455	98.2312	-0.0962865
2.48767	38.0179	13.1037	-1.28753	98.2217	-0.0965103
2.496	38.1086	13.1024	-1.29047	98.2122	-0.0967301
2.50433	38.2013	13.1011	-1.2934	98.2028	-0.0969501
2.51267	38.2935	13.0999	-1.29631	98.1933	-0.0971681
2.521	38.3839	13.0986	-1.29918	98.1837	-0.0973829
2.52933	38.4659	13.0973	-1.30208	98.1738	-0.0976006
2.53767	38.5519	13.0959	-1.305	98.1637	-0.0978193
2.546	38.6434	13.0945	-1.30791	98.1533	-0.0980377
2.55433	38.7385	13.0931	-1.31078	98.1429	-0.0982524
2.56267	38.8294	13.0918	-1.3136	98.1327	-0.0984643
2.571	38.9141	13.0904	-1.31638	98.1225	-0.0986729
2.57933	38.9986	13.0891	-1.31918	98.1124	-0.0988826
2.58767	39.0894	13.0877	-1.32201	98.1025	-0.0990946
2.596	39.1786	13.0865	-1.32483	98.0928	-0.0993057
2.60433	39.2726	13.0852	-1.32767	98.0832	-0.0995187
2.61267	39.3609	13.0839	-1.33045	98.0735	-0.0997269
2.621	39.4447	13.0826	-1.3332	98.064	-0.0999335
2.62933	39.5347	13.0814	-1.33593	98.0546	-0.100138
2.63767	39.622	13.0801	-1.33871	98.0448	-0.100347
2.646	39.7107	13.0787	-1.34152	98.0348	-0.100557
2.65433	39.7943	13.0774	-1.34435	98.0246	-0.100769
2.66267	39.8886	13.076	-1.34709	98.0142	-0.100975
2.671	39.9695	13.0746	-1.34981	98.004	-0.101179
2.67933	40.0581	13.0732	-1.35258	97.9938	-0.101386
2.68767	40.1433	13.0719	-1.35533	97.9833	-0.101592
2.696	40.2323	13.0705	-1.3581	97.973	-0.1018
2.70433	40.3213	13.0691	-1.36083	97.9626	-0.102004
2.71267	40.4051	13.0677	-1.36357	97.9523	-0.102209
2.721	40.4919	13.0664	-1.36625	97.9421	-0.102411
2.72933	40.5769	13.065	-1.36886	97.9321	-0.102606
2.73767	40.6641	13.0637	-1.37146	97.9219	-0.102801
2.746	40.7481	13.0624	-1.37416	97.9121	-0.103004
2.75433	40.8339	13.061	-1.37685	97.9019	-0.103205
2.76267	40.9169	13.0596	-1.37944	97.8916	-0.103399
2.771	40.9963	13.0583	-1.38201	97.8814	-0.103592
2.77933	41.0855	13.0569	-1.3846	97.8712	-0.103786
2.78767	41.1672	13.0556	-1.38722	97.8611	-0.103983
2.796	41.2523	13.0542	-1.38983	97.8507	-0.104178
2.80433	41.3409	13.0528	-1.39244	97.8404	-0.104373
2.81267	41.417	13.0514	-1.39505	97.83	-0.104569
2.821	41.5069	13.05	-1.39763	97.8196	-0.104763
2.82933	41.587	13.0486	-1.40017	97.809	-0.104953
2.83767	41.6751	13.0472	-1.40261	97.7986	-0.105136
2.846	41.7613	13.0458	-1.40511	97.788	-0.105323
2.85433	41.8427	13.0444	-1.40765	97.7772	-0.105514
2.86267	41.9237	13.0429	-1.41013	97.7661	-0.1057
2.871	42.0061	13.0414	-1.41258	97.755	-0.105884
2.87933	42.0917	13.04	-1.415	97.7442	-0.106065
2.88767	42.1741	13.0385	-1.41739	97.7334	-0.106244
2.896	42.2607	13.0371	-1.41977	97.7228	-0.106422
2.90433	42.3431	13.0357	-1.42214	97.7124	-0.1066
2.91267	42.4263	13.0344	-1.42448	97.7023	-0.106776
2.921	42.5061	13.033	-1.42686	97.6921	-0.106954
2.92933	42.5898	13.0317	-1.42919	97.6823	-0.107128
2.93767	42.6712	13.0304	-1.43151	97.6726	-0.107302
2.946	42.7567	13.0291	-1.43378	97.6631	-0.107472
2.95433	42.8362	13.0279	-1.43603	97.6535	-0.107641
2.96267	42.9116	13.0265	-1.43832	97.6436	-0.107813
2.971	43.0025	13.0252	-1.44061	97.6338	-0.107984
2.97933	43.0733	13.0239	-1.44291	97.624	-0.108157
2.98767	43.1632	13.0226	-1.44516	97.6139	-0.108325
2.996	43.243	13.0212	-1.44738	97.6038	-0.108492
3.00433	43.3211	13.0198	-1.44955	97.5932	-0.108655
3.01267	43.406	13.0184	-1.45172	97.5825	-0.108817
3.021	43.4859	13.017	-1.45385	97.5722	-0.108977
3.02933	43.5665	13.0156	-1.45602	97.5616	-0.10914
3.03767	43.6499	13.0142	-1.45816	97.5511	-0.1093
3.046	43.7308	13.0128	-1.46025	97.5407	-0.109456
3.05433	43.8137	13.0114	-1.4623	97.5305	-0.10961
3.06267	43.8896	13.0101	-1.46432	97.5201	-0.109762
3.071	43.9749	13.0087	-1.46636	97.5098	-0.109915
3.07933	44.0537	13.0073	-1.46837	97.4992	-0.110065
3.08767	44.1321	13.0059	-1.4704	97.4889	-0.110217
3.096	44.2168	13.0045	-1.4724	97.4784	-0.110368
3.10433	44.292	13.0031	-1.47437	97.4676	-0.110515
3.11267	44.3732	13.0016	-1.47629	97.4568	-0.110659
3.121	44.4541	13.0002	-1.47819	97.4461	-0.110802
3.12933	44.5241	12.9988	-1.48008	97.4357	-0.110943
3.13767	44.6134	12.9974	-1.48198	97.4251	-0.111085
3.146	44.6884	12.996	-1.48379	97.4144	-0.111221
3.15433	44.7723	12.9946	-1.48561	97.404	-0.111358
3.16267	44.857	12.9932	-1.48742	97.3936	-0.111493
3.171	44.934	12.9918	-1.48918	97.3829	-0.111626
3.17933	45.0094	12.9904	-1.49098	97.3725	-0.11176
3.18767	45.0921	12.989	-1.49274	97.3622	-0.111892
3.196	45.1649	12.9876	-1.49452	97.3521	-0.112025
3.20433	45.2384	12.9863	-1.49626	97.3422	-0.112156
3.21267	45.3228	12.985	-1.498	97.3322	-0.112286
3.221	45.4042	12.9836	-1.4997	97.3221	-0.112414
3.22933	45.4766	12.9823	-1.50142	97.312	-0.112543
3.23767	45.5559	12.9809	-1.50307	97.3018	-0.112666
3.246	45.6454	12.9796	-1.5047	97.2918	-0.112788
3.25433	45.7169	12.9783	-1.50637	97.282	-0.112914
3.26267	45.7914	12.977	-1.50798	97.2722	-0.113035
3.271	45.8743	12.9757	-1.5096	97.2626	-0.113156
3.27933	45.9542	12.9744	-1.51114	97.253	-0.113271
3.28767	46.0336	12.9731	-1.51268	97.2431	-0.113387
3.296	46.1055	12.9718	-1.51413	97.2332	-0.113495
3.30433	46.1869	12.9704	-1.5156	97.2231	-0.113606
3.31267	46.2629	12.9691	-1.51707	97.2132	-0.113716
3.321	46.3459	12.9678	-1.51849	97.203	-0.113823
3.32933	46.4221	12.9664	-1.51991	97.1928	-0.113929
3.33767	46.4971	12.9651	-1.52128	97.1829	-0.114031
3.346	46.5747	12.9638	-1.52263	97.1731	-0.114132
3.35433	46.6485	12.9625	-1.52397	97.1633	-0.114233
3.36267	46.7316	12.9611	-1.52533	97.1531	-0.114335
3.371	46.8074	12.9597	-1.52666	97.143	-0.114435
3.37933	46.8899	12.9584	-1.52801	97.133	-0.114536
3.38767	46.9647	12.9571	-1.52929	97.1231	-0.114632
3.396	47.0426	12.9558	-1.53059	97.1132	-0.11473
3.40433	47.1156	12.9545	-1.53188	97.1034	-0.114826
3.41267	47.1958	12.9531	-1.53313	97.0934	-0.11492
3.421	47.2708	12.9518	-1.53436	97.0836	-0.115011
3.42933	47.3447	12.9505	-1.53554	97.0734	-0.1151
3.43767	47.4255	12.9491	-1.53671	97.0632	-0.115188
3.446	47.5051	12.9478	-1.53787	97.0533	-0.115275
3.45433	47.5798	12.9465	-1.53898	97.0434	-0.115358
3.46267	47.6543	12.9451	-1.54007	97.0332	-0.115439
3.471	47.728	12.9438	-1.54119	97.0231	-0.115523
3.47933	47.8106	12.9424	-1.54228	97.0132	-0.115606
3.48767	47.8894	12.9411	-1.54337	97.0033	-0.115687
3.496	47.9658	12.9398	-1.54442	96.9935	-0.115766
3.50433	48.0364	12.9385	-1.54547	96.9836	-0.115844
3.51267	48.117	12.9372	-1.54647	96.974	-0.115919
3.521	48.1927	12.9359	-1.5474	96.9644	-0.115989
3.52933	48.2699	12.9346	-1.54832	96.9547	-0.116058
3.53767	48.3497	12.9334	-1.54926	96.9451	-0.116128
3.546	48.4204	12.9321	-1.55022	96.9357	-0.116201
3.55433	48.5031	12.9308	-1.55108	96.9262	-0.116265
3.56267	48.5808	12.9296	-1.55192	96.9166	-0.116328
3.571	48.6535	12.9283	-1.55271	96.907	-0.116387
3.57933	48.729	12.927	-1.55355	96.8974	-0.11645
3.58767	48.8059	12.9257	-1.55435	96.8878	-0.11651
3.596	48.8841	12.9244	-1.55514	96.8782	-0.11657
3.60433	48.9626	12.9231	-1.5559	96.8687	-0.116627
3.61267	49.0363	12.9219	-1.55662	96.8591	-0.11668
3.621	49.1193	12.9206	-1.55732	96.8496	-0.116733
3.62933	49.194	12.9193	-1.55801	96.8402	-0.116784
3.63767	49.2733	12.9181	-1.5587	96.8309	-0.116836
3.646	49.3458	12.9169	-1.55938	96.8218	-0.116887
3.65433	49.4195	12.9157	-1.56006	96.8128	-0.116938
3.66267	49.4967	12.9145	-1.56067	96.8037	-0.116984
3.671	49.5779	12.9132	-1.56127	96.7944	-0.117029
3.67933	49.6534	12.912	-1.56188	96.7849	-0.117075
3.68767	49.7333	12.9108	-1.56252	96.7757	-0.117122
3.696	49.8102	12.9095	-1.56312	96.7664	-0.117168
3.70433	49.8859	12.9083	-1.56366	96.7572	-0.117208
3.71267	49.9641	12.9071	-1.56414	96.748	-0.117244
3.721	50.0402	12.9058	-1.56462	96.7388	-0.11728
3.72933	50.1117	12.9046	-1.56512	96.7295	-0.117317
3.73767	50.1911	12.9033	-1.56559	96.7202	-0.117352
3.746	50.2671	12.9021	-1.56601	96.711	-0.117384
3.75433	50.3448	12.9009	-1.56646	96.7019	-0.117418
3.76267	50.4285	12.8997	-1.56687	96.6929	-0.117448
3.771	50.4967	12.8984	-1.56727	96.6833	-0.117478
3.77933	50.5724	12.8972	-1.56765	96.674	-0.117507
3.78767	50.6553	12.8959	-1.56805	96.6646	-0.117537
3.796	50.7292	12.8947	-1.56843	96.6554	-0.117566
3.80433	50.8012	12.8935	-1.5688	96.6463	-0.117593
3.81267	50.8849	12.8923	-1.56915	96.6371	-0.117619
3.821	50.9624	12.891	-1.56947	96.628	-0.117644
3.82933	51.0421	12.8898	-1.56984	96.6189	-0.117671
3.83767	51.1131	12.8886	-1.57012	96.6099	-0.117692
3.846	51.1921	12.8874	-1.5704	96.6009	-0.117713
3.85433	51.2647	12.8863	-1.57067	96.5924	-0.117734
3.86267	51.3435	12.8851	-1.57099	96.5836	-0.117757
3.871	51.4219	12.884	-1.57122	96.5748	-0.117775
3.87933	51.4962	12.8827	-1.57149	96.5657	-0.117795
3.88767	51.5845	12.8816	-1.57171	96.5569	-0.117811
3.896	51.655	12.8804	-1.57187	96.5481	-0.117824
3.90433	51.7304	12.8792	-1.57209	96.5391	-0.11784
3.91267	51.8187	12.878	-1.57222	96.5304	-0.117849
3.921	51.8839	12.8768	-1.57238	96.5214	-0.117862
3.92933	51.9626	12.8756	-1.57254	96.5125	-0.117874
3.93767	52.0382	12.8744	-1.57269	96.5035	-0.117885
3.946	52.1194	12.8733	-1.57275	96.4948	-0.11789
3.95433	52.1969	12.8721	-1.5729	96.4858	-0.1179
3.96267	52.2721	12.8709	-1.57297	96.4773	-0.117906
3.971	52.35	12.8698	-1.57305	96.4685	-0.117912
3.97933	52.4306	12.8686	-1.57313	96.4596	-0.117918
3.98767	52.5049	12.8674	-1.57315	96.4507	-0.11792
3.996	52.5787	12.8662	-1.57321	96.442	-0.117924
4.00433	52.6579	12.8651	-1.57326	96.4334	-0.117928
4.01267	52.739	12.864	-1.57328	96.425	-0.117929
4.021	52.8156	12.8628	-1.57329	96.4167	-0.11793
4.02933	52.8978	12.8617	-1.57326	96.408	-0.117928
4.03767	52.9765	12.8606	-1.57321	96.3996	-0.117924
4.046	53.0508	12.8594	-1.57319	96.3911	-0.117922
4.05433	53.1269	12.8583	-1.57315	96.3826	-0.117919
4.06267	53.2052	12.8572	-1.57311	96.3742	-0.117917
4.071	53.2893	12.856	-1.57306	96.3657	-0.117912
4.07933	53.3657	12.8549	-1.57301	96.3569	-0.117909
4.08767	53.4432	12.8537	-1.57295	96.3484	-0.117904
4.096	53.5158	12.8526	-1.57286	96.3396	-0.117897
4.10433	53.5948	12.8514	-1.57275	96.331	-0.11789
4.11267	53.6757	12.8503	-1.57271	96.3223	-0.117886
4.121	53.7519	12.8491	-1.57264	96.3136	-0.117881
4.12933	53.8285	12.848	-1.57255	96.3051	-0.117875
4.13767	53.9049	12.8468	-1.57244	96.2967	-0.117866
4.146	53.9897	12.8457	-1.57226	96.2884	-0.117853
4.15433	54.0684	12.8447	-1.57208	96.2803	-0.117839
4.16267	54.1438	12.8436	-1.57191	96.2721	-0.117827
4.171	54.2255	12.8424	-1.57173	96.2637	-0.117813
4.17933	54.3026	12.8413	-1.57157	96.2554	-0.117801
4.18767	54.3816	12.8402	-1.5714	96.2473	-0.117788
4.196	54.4576	12.8391	-1.57118	96.2389	-0.117772
4.20433	54.5364	12.838	-1.57097	96.2307	-0.117756
4.21267	54.6132	12.8369	-1.57073	96.2224	-0.117738
4.221	54.6973	12.8359	-1.57051	96.2143	-0.117721
4.22933	54.7745	12.8347	-1.57031	96.2059	-0.117707
4.23767	54.8523	12.8336	-1.57007	96.1973	-0.117688
4.246	54.9328	12.8325	-1.5698	96.1889	-0.117668
4.25433	55.0121	12.8314	-1.56954	96.1808	-0.117649
4.26267	55.0884	12.8303	-1.56925	96.1729	-0.117627
4.271	55.17	12.8293	-1.569	96.1648	-0.117608
4.27933	55.2543	12.8282	-1.56873	96.1566	-0.117588
4.28767	55.3227	12.8271	-1.56841	96.1485	-0.117564
4.296	55.4061	12.826	-1.56809	96.1404	-0.11754
4.30433	55.4847	12.8249	-1.56776	96.1321	-0.117515
4.31267	55.5626	12.8238	-1.56742	96.1241	-0.11749
4.321	55.6472	12.8228	-1.56712	96.1163	-0.117467
4.32933	55.7243	12.8217	-1.5668	96.1084	-0.117443
4.33767	55.8035	12.8206	-1.56646	96.1002	-0.117418
4.346	55.8878	12.8196	-1.56611	96.0922	-0.117392
4.35433	55.9637	12.8185	-1.56571	96.0841	-0.117362
4.36267	56.0512	12.8174	-1.56532	96.0762	-0.117333
4.371	56.1214	12.8164	-1.56497	96.0686	-0.117306
4.37933	56.2034	12.8154	-1.56461	96.0608	-0.117279
4.38767	56.2847	12.8143	-1.56422	96.053	-0.11725
4.396	56.3639	12.8133	-1.56385	96.0452	-0.117222
4.40433	56.4407	12.8123	-1.56346	96.0374	-0.117193
4.41267	56.5245	12.8112	-1.56302	96.0297	-0.11716
4.421	56.6018	12.8102	-1.56259	96.0218	-0.117127
4.42933	56.6854	12.8091	-1.56216	96.0135	-0.117095
4.43767	56.7644	12.808	-1.56176	96.0056	-0.117065
4.446	56.8499	12.807	-1.56136	95.9978	-0.117036
4.45433	56.9268	12.8059	-1.56092	95.9898	-0.117003
4.46267	57.002	12.8048	-1.56052	95.9818	-0.116973
4.471	57.0855	12.8038	-1.56008	95.974	-0.116939
4.47933	57.1684	12.8027	-1.55959	95.966	-0.116903
4.48767	57.2463	12.8017	-1.55916	95.958	-0.11687
4.496	57.3284	12.8006	-1.55874	95.9501	-0.116839
4.50433	57.4062	12.7996	-1.55826	95.9423	-0.116803
4.51267	57.4926	12.7986	-1.55781	95.9348	-0.11677
4.521	57.565	12.7975	-1.55734	95.927	-0.116735
4.52933	57.6516	12.7965	-1.55687	95.9192	-0.116699
4.53767	57.7295	12.7954	-1.55639	95.9114	-0.116663
4.546	57.8146	12.7944	-1.55589	95.9036	-0.116626
4.55433	57.8899	12.7934	-1.55542	95.8959	-0.11659
4.56267	57.9722	12.7923	-1.55495	95.8881	-0.116555
4.571	58.0527	12.7913	-1.55445	95.8804	-0.116518
4.57933	58.1344	12.7903	-1.55394	95.8728	-0.116479
4.58767	58.2156	12.7893	-1.55346	95.8652	-0.116443
4.596	58.2978	12.7883	-1.55294	95.8576	-0.116404
4.60433	58.3798	12.7873	-1.5524	95.85	-0.116364
4.61267	58.463	12.7862	-1.55187	95.8424	-0.116324
4.621	58.5439	12.7853	-1.55134	95.8351	-0.116285
4.62933	58.6254	12.7843	-1.55081	95.8278	-0.116245
4.63767	58.7023	12.7833	-1.55028	95.8204	-0.116205
4.646	58.7893	12.7823	-1.54973	95.8127	-0.116164
4.65433	58.87	12.7813	-1.54919	95.8054	-0.116123
4.66267	58.9532	12.7803	-1.54865	95.7979	-0.116083
4.671	59.0328	12.7793	-1.54811	95.7906	-0.116042
4.67933	59.1152	12.7783	-1.54758	95.7832	-0.116003
4.68767	59.1955	12.7773	-1.54703	95.7757	-0.115961
4.696	59.2805	12.7763	-1.54648	95.7682	-0.11592
4.70433	59.3645	12.7753	-1.54592	95.7605	-0.115878
4.71267	59.4418	12.7743	-1.54539	95.7528	-0.115839
4.721	59.5252	12.7733	-1.54486	95.7452	-0.115799
4.72933	59.6087	12.7723	-1.54432	95.738	-0.115758
4.73767	59.6883	12.7713	-1.54378	95.7304	-0.115718
4.746	59.7745	12.7703	-1.54325	95.7229	-0.115678
4.75433	59.8554	12.7693	-1.54273	95.7153	-0.115639
4.76267	59.9384	12.7683	-1.54217	95.7079	-0.115597
4.771	60.0215	12.7673	-1.54167	95.7006	-0.11556
4.77933	60.0989	12.7663	-1.54116	95.6932	-0.115521
4.78767	60.1864	12.7653	-1.54064	95.6856	-0.115482
4.796	60.2693	12.7643	-1.54012	95.6783	-0.115443
4.80433	60.3543	12.7634	-1.53958	95.6709	-0.115403
4.81267	60.4383	12.7624	-1.53908	95.6636	-0.115366
4.821	60.5231	12.7614	-1.53858	95.6564	-0.115328
4.82933	60.6013	12.7604	-1.53805	95.6489	-0.115288
4.83767	60.6852	12.7595	-1.53755	95.6417	-0.115251
4.846	60.7683	12.7585	-1.53707	95.6343	-0.115215
4.85433	60.8495	12.7575	-1.53656	95.6268	-0.115177
4.86267	60.9296	12.7565	-1.53609	95.6196	-0.115142
4.871	61.011	12.7556	-1.53559	95.6125	-0.115104
4.87933	61.1005	12.7546	-1.53506	95.6053	-0.115065
4.88767	61.1801	12.7536	-1.53454	95.598	-0.115025
4.896	61.2657	12.7527	-1.53401	95.5907	-0.114986
4.90433	61.345	12.7517	-1.53348	95.5834	-0.114946
4.91267	61.4315	12.7507	-1.53293	95.576	-0.114905
4.921	61.5143	12.7497	-1.53239	95.5686	-0.114864
4.92933	61.5941	12.7487	-1.53184	95.5612	-0.114822
4.93767	61.6862	12.7478	-1.53127	95.554	-0.11478
4.946	61.7691	12.7468	-1.53067	95.5466	-0.114735
4.95433	61.8505	12.7458	-1.53015	95.5391	-0.114696
4.96267	61.9375	12.7448	-1.52962	95.5316	-0.114656
4.971	62.0143	12.7438	-1.52906	95.5242	-0.114615
4.97933	62.0939	12.7428	-1.52857	95.5169	-0.114578
4.98767	62.181	12.7418	-1.52808	95.5094	-0.114541
4.996	62.2639	12.7408	-1.52759	95.5021	-0.114504
5.00433	62.3488	12.7399	-1.52707	95.4952	-0.114466
5.01267	62.4305	12.739	-1.52657	95.4882	-0.114428
5.021	62.5186	12.738	-1.52609	95.481	-0.114392
5.02933	62.6029	12.7371	-1.5256	95.474	-0.114355
5.03767	62.6881	12.7361	-1.52509	95.4669	-0.114317
5.046	62.7705	12.7352	-1.52457	95.4598	-0.114278
5.05433	62.8556	12.7343	-1.52408	95.4529	-0.114241
5.06267	62.9399	12.7333	-1.52354	95.4456	-0.114201
5.071	63.0229	12.7324	-1.52303	95.4386	-0.114163
5.07933	63.1124	12.7314	-1.5225	95.4314	-0.114123
5.08767	63.1897	12.7304	-1.52201	95.424	-0.114086
5.096	63.2721	12.7294	-1.52151	95.4166	-0.114048
5.10433	63.36	12.7285	-1.52099	95.4092	-0.114009
5.11267	63.4461	12.7275	-1.52051	95.4019	-0.113974
5.121	63.5288	12.7265	-1.52002	95.3948	-0.113937
5.12933	63.6097	12.7256	-1.51957	95.3877	-0.113903
5.13767	63.6992	12.7246	-1.51914	95.3804	-0.113871
5.146	63.7843	12.7236	-1.51867	95.3732	-0.113836
5.15433	63.8674	12.7227	-1.51822	95.3659	-0.113802
5.16267	63.9512	12.7217	-1.5178	95.3586	-0.11377
5.171	64.0337	12.7207	-1.51734	95.3512	-0.113736
5.17933	64.1203	12.7197	-1.5169	95.344	-0.113703
5.18767	64.2068	12.7188	-1.5165	95.3367	-0.113673
5.196	64.2872	12.7178	-1.51612	95.3296	-0.113645
5.20433	64.3756	12.7169	-1.51572	95.3225	-0.113615
5.21267	64.457	12.7159	-1.5153	95.3152	-0.113583
5.221	64.5468	12.715	-1.51488	95.3081	-0.113551
5.22933	64.6259	12.714	-1.51451	95.301	-0.113524
5.23767	64.7114	12.7131	-1.51415	95.2939	-0.113497
5.246	64.7966	12.7121	-1.51382	95.287	-0.113472
5.25433	64.8786	12.7112	-1.5135	95.2799	-0.113448
5.26267	64.9618	12.7102	-1.5132	95.2726	-0.113426
5.271	65.0557	12.7093	-1.51291	95.2654	-0.113404
5.27933	65.1347	12.7083	-1.51256	95.258	-0.113378
5.28767	65.2213	12.7073	-1.51227	95.2504	-0.113356
5.296	65.3073	12.7063	-1.51202	95.2429	-0.113337
5.30433	65.3916	12.7052	-1.51175	95.2353	-0.113317
5.31267	65.4718	12.7043	-1.5115	95.2278	-0.113299
5.321	65.562	12.7032	-1.51128	95.2202	-0.113282
5.32933	65.6427	12.7022	-1.51104	95.2126	-0.113264
5.33767	65.7321	12.7012	-1.51084	95.2051	-0.113249
5.346	65.8121	12.7002	-1.51066	95.1976	-0.113235
5.35433	65.899	12.6992	-1.51045	95.1898	-0.113219
5.36267	65.9851	12.6982	-1.51029	95.1823	-0.113208
5.371	66.0703	12.6972	-1.5102	95.1748	-0.1132
5.37933	66.1526	12.6962	-1.51009	95.1674	-0.113192
5.38767	66.233	12.6952	-1.51001	95.1599	-0.113186
5.396	66.3204	12.6942	-1.50995	95.1524	-0.113182
5.40433	66.4089	12.6932	-1.50987	95.1448	-0.113176
5.41267	66.488	12.6921	-1.50985	95.1371	-0.113175
5.421	66.5775	12.6911	-1.50983	95.1294	-0.113173
5.42933	66.6575	12.6901	-1.50981	95.1221	-0.113172
5.43767	66.7458	12.6892	-1.50986	95.1149	-0.113175
5.446	66.8265	12.6882	-1.50991	95.1073	-0.113179
5.45433	66.9103	12.6871	-1.50995	95.0996	-0.113182
5.46267	67.0022	12.6861	-1.51	95.0916	-0.113186
5.471	67.0911	12.6851	-1.51008	95.0839	-0.113192
5.47933	67.1788	12.684	-1.51014	95.0763	-0.113196
5.48767	67.2582	12.683	-1.51021	95.0685	-0.113202
5.496	67.3459	12.682	-1.51033	95.061	-0.11321
5.50433	67.4323	12.6809	-1.51048	95.0531	-0.113222
5.51267	67.5208	12.6799	-1.51065	95.0452	-0.113234
5.521	67.5988	12.6788	-1.51079	95.0371	-0.113245
5.52933	67.6849	12.6777	-1.51096	95.029	-0.113258
5.53767	67.7723	12.6767	-1.51113	95.021	-0.113271
5.546	67.859	12.6756	-1.51135	95.0134	-0.113287
5.55433	67.9392	12.6746	-1.51159	95.0053	-0.113305
5.56267	68.024	12.6735	-1.51187	94.9971	-0.113326
5.571	68.1133	12.6724	-1.51216	94.9892	-0.113348
5.57933	68.1985	12.6714	-1.51244	94.9812	-0.113369
5.58767	68.2868	12.6703	-1.5127	94.9733	-0.113388
5.596	68.3609	12.6692	-1.51301	94.9653	-0.113411
5.60433	68.4484	12.6681	-1.51335	94.9572	-0.113437
5.61267	68.535	12.6671	-1.51372	94.9492	-0.113464
5.621	68.6177	12.666	-1.5141	94.941	-0.113493
5.62933	68.7067	12.6649	-1.5145	94.9329	-0.113523
5.63767	68.7942	12.6638	-1.51492	94.9246	-0.113555
5.646	68.8751	12.6627	-1.51537	94.9163	-0.113588
5.65433	68.9553	12.6616	-1.51583	94.9078	-0.113623
5.66267	69.0415	12.6604	-1.51632	94.8994	-0.113659
5.671	69.1279	12.6593	-1.51687	94.8909	-0.113701
5.67933	69.2078	12.6582	-1.51741	94.8824	-0.113741
5.68767	69.2949	12.657	-1.51792	94.8738	-0.113779
5.696	69.3845	12.6559	-1.51845	94.8653	-0.113819
5.70433	69.4681	12.6548	-1.51901	94.8569	-0.113861
5.71267	69.5533	12.6536	-1.51955	94.8482	-0.113901
5.721	69.6374	12.6525	-1.52014	94.8399	-0.113946
5.72933	69.7246	12.6514	-1.52069	94.8316	-0.113987
5.73767	69.8048	12.6503	-1.52124	94.8234	-0.114028
5.746	69.8863	12.6492	-1.52179	94.8148	-0.114069
5.75433	69.9766	12.648	-1.52238	94.8062	-0.114114
5.76267	70.0567	12.6469	-1.52301	94.7978	-0.114161
5.771	70.1418	12.6457	-1.52369	94.7893	-0.114212
5.77933	70.2315	12.6446	-1.52433	94.7809	-0.11426
5.78767	70.3173	12.6435	-1.52496	94.7725	-0.114307
5.796	70.4026	12.6424	-1.52562	94.7641	-0.114356
5.80433	70.487	12.6412	-1.52628	94.7554	-0.114406
5.81267	70.5678	12.6401	-1.527	94.7467	-0.11446
5.821	70.6593	12.6389	-1.52771	94.738	-0.114513
5.82933	70.7439	12.6378	-1.52845	94.7294	-0.114569
5.83767	70.8241	12.6366	-1.52916	94.7209	-0.114622
5.846	70.9092	12.6355	-1.52987	94.7122	-0.114675
5.85433	70.9974	12.6343	-1.53058	94.7034	-0.114729
5.86267	71.0796	12.6331	-1.53132	94.6945	-0.114784
5.871	71.1634	12.6319	-1.53213	94.6857	-0.114845
5.87933	71.2501	12.6308	-1.53292	94.6771	-0.114904
5.88767	71.331	12.6296	-1.5337	94.6684	-0.114962
5.896	71.4222	12.6284	-1.53444	94.6596	-0.115018
5.90433	71.4982	12.6273	-1.53523	94.6508	-0.115077
5.91267	71.5849	12.6261	-1.53601	94.642	-0.115136
5.921	71.6755	12.625	-1.53684	94.6334	-0.115197
5.92933	71.7576	12.6238	-1.53761	94.6249	-0.115255
5.93767	71.8416	12.6227	-1.53841	94.6163	-0.115315
5.946	71.9237	12.6215	-1.53926	94.6074	-0.115379
5.95433	72.0111	12.6203	-1.54006	94.5984	-0.115439
5.96267	72.0937	12.6191	-1.54089	94.5894	-0.115502
5.971	72.1809	12.6179	-1.54177	94.5804	-0.115567
5.97933	72.2654	12.6167	-1.54268	94.5714	-0.115635
5.98767	72.3454	12.6155	-1.54357	94.5624	-0.115702
5.996	72.4313	12.6143	-1.54448	94.5534	-0.11577
6.00433	72.5177	12.613	-1.54537	94.5441	-0.115837
6.01267	72.599	12.6118	-1.54631	94.5347	-0.115907
6.021	72.6881	12.6106	-1.54725	94.5256	-0.115978
6.02933	72.7706	12.6094	-1.54815	94.5166	-0.116045
6.03767	72.8539	12.6082	-1.54906	94.5075	-0.116114
6.046	72.9371	12.6069	-1.54999	94.4982	-0.116183
6.05433	73.0262	12.6057	-1.5509	94.4892	-0.116252
6.06267	73.1137	12.6045	-1.55181	94.4802	-0.11632
6.071	73.1986	12.6033	-1.55272	94.4711	-0.116388
6.07933	73.2802	12.602	-1.55366	94.4617	-0.116458
6.08767	73.3675	12.6008	-1.5546	94.4525	-0.116529
6.096	73.4453	12.5996	-1.55554	94.4435	-0.116599
6.10433	73.5334	12.5984	-1.55646	94.4342	-0.116669
6.11267	73.6182	12.5971	-1.55739	94.4247	-0.116738
6.121	73.6996	12.5959	-1.55834	94.4157	-0.116809
6.12933	73.7874	12.5947	-1.55927	94.4067	-0.116879
6.13767	73.8704	12.5935	-1.56019	94.3974	-0.116948
6.146	73.9543	12.5922	-1.56113	94.3882	-0.117018
6.15433	74.0364	12.591	-1.56211	94.3788	-0.117092
6.16267	74.1239	12.5898	-1.56307	94.3698	-0.117164
6.171	74.2087	12.5885	-1.56404	94.3605	-0.117237
6.17933	74.2886	12.5873	-1.56507	94.3511	-0.117313
6.18767	74.3766	12.5861	-1.56606	94.3418	-0.117388
6.196	74.4627	12.5848	-1.56708	94.3326	-0.117464
6.20433	74.544	12.5836	-1.56808	94.3232	-0.117539
6.21267	74.6279	12.5823	-1.56909	94.3137	-0.117615
6.221	74.7132	12.5811	-1.57011	94.3044	-0.117692
6.22933	74.7962	12.5798	-1.57109	94.295	-0.117765
6.23767	74.8823	12.5785	-1.57207	94.2854	-0.117838
6.246	74.9595	12.5772	-1.57307	94.2757	-0.117913
6.25433	75.0475	12.576	-1.57405	94.2661	-0.117987
6.26267	75.1288	12.5747	-1.575	94.2566	-0.118058
6.271	75.2142	12.5734	-1.57599	94.2471	-0.118132
6.27933	75.305	12.5721	-1.57696	94.2374	-0.118205
6.28767	75.3889	12.5709	-1.57797	94.2279	-0.11828
6.296	75.4715	12.5696	-1.57893	94.2182	-0.118353
6.30433	75.5557	12.5683	-1.57993	94.2086	-0.118428
6.31267	75.6382	12.567	-1.58097	94.199	-0.118505
6.321	75.728	12.5657	-1.58198	94.1894	-0.118581
6.32933	75.8067	12.5644	-1.58296	94.1799	-0.118655
6.33767	75.8892	12.5632	-1.58393	94.1703	-0.118728
6.346	75.9744	12.5619	-1.5849	94.1608	-0.1188
6.35433	76.0557	12.5606	-1.58594	94.1512	-0.118878
6.36267	76.1448	12.5594	-1.58698	94.1418	-0.118956
6.371	76.2257	12.5581	-1.58796	94.1322	-0.11903
6.37933	76.3123	12.5568	-1.58897	94.1227	-0.119105
6.38767	76.3906	12.5556	-1.59	94.1133	-0.119182
6.396	76.477	12.5543	-1.59101	94.1038	-0.119258
6.40433	76.5614	12.553	-1.59204	94.094	-0.119335
6.41267	76.6483	12.5517	-1.59308	94.0843	-0.119413
6.421	76.7337	12.5504	-1.59413	94.0746	-0.119492
6.42933	76.8101	12.5491	-1.59517	94.0649	-0.11957
6.43767	76.8956	12.5478	-1.59614	94.055	-0.119643
6.446	76.9776	12.5465	-1.59712	94.0452	-0.119716
6.45433	77.0671	12.5452	-1.59815	94.0356	-0.119793
6.46267	77.1455	12.5439	-1.59915	94.0258	-0.119868
6.471	77.2329	12.5426	-1.60016	94.016	-0.119944
6.47933	77.3215	12.5413	-1.60118	94.0064	-0.12002
6.48767	77.4033	12.5401	-1.60218	93.9971	-0.120095
6.496	77.4833	12.5388	-1.60319	93.9875	-0.120171
6.50433	77.5658	12.5375	-1.60418	93.9777	-0.120245
6.51267	77.6403	12.5362	-1.60519	93.9679	-0.120321
6.521	77.7271	12.5349	-1.6062	93.9582	-0.120397
6.52933	77.8121	12.5336	-1.60719	93.9484	-0.120471
6.53767	77.8961	12.5322	-1.60816	93.9386	-0.120544
6.546	77.9813	12.5309	-1.60917	93.9285	-0.120619
6.55433	78.0652	12.5296	-1.61017	93.9186	-0.120694
6.56267	78.1446	12.5282	-1.61117	93.9085	-0.120769
6.571	78.2362	12.5269	-1.61217	93.8985	-0.120844
6.57933	78.3155	12.5256	-1.61317	93.8886	-0.120919
6.58767	78.3986	12.5243	-1.61416	93.8789	-0.120993
6.596	78.4827	12.523	-1.61512	93.869	-0.121065
6.60433	78.5649	12.5216	-1.61608	93.859	-0.121137
6.61267	78.6528	12.5203	-1.61707	93.8491	-0.121212
6.621	78.7273	12.519	-1.61804	93.839	-0.121284
6.62933	78.813	12.5176	-1.61902	93.829	-0.121357
6.63767	78.8947	12.5163	-1.61997	93.8191	-0.121429
6.646	78.983	12.515	-1.62091	93.8093	-0.121499
6.65433	79.0569	12.5137	-1.62187	93.7992	-0.121572
6.66267	79.1436	12.5123	-1.62282	93.7892	-0.121643
6.671	79.2255	12.511	-1.62381	93.7793	-0.121717
6.67933	79.3047	12.5097	-1.62479	93.7692	-0.12179
6.68767	79.3866	12.5083	-1.62576	93.7591	-0.121863
6.696	79.4727	12.507	-1.62674	93.7492	-0.121936
6.70433	79.5525	12.5057	-1.62771	93.7393	-0.122009
6.71267	79.6343	12.5044	-1.62869	93.7296	-0.122082
6.721	79.7231	12.503	-1.62963	93.7196	-0.122153
6.72933	79.8026	12.5017	-1.63058	93.7097	-0.122224
6.73767	79.8897	12.5004	-1.63153	93.6998	-0.122295
6.746	79.969	12.4991	-1.63246	93.6897	-0.122365
6.75433	80.0532	12.4977	-1.63335	93.6797	-0.122431
6.76267	80.1405	12.4964	-1.63423	93.6698	-0.122498
6.771	80.2277	12.4951	-1.63516	93.6598	-0.122567
6.77933	80.3072	12.4937	-1.63605	93.6498	-0.122634
6.78767	80.3884	12.4924	-1.63695	93.6398	-0.122702
6.796	80.4717	12.4911	-1.63784	93.6298	-0.122768
6.80433	80.5551	12.4897	-1.63873	93.6199	-0.122835
6.81267	80.6376	12.4884	-1.63961	93.6096	-0.122901
6.821	80.7203	12.487	-1.64047	93.5996	-0.122966
6.82933	80.8011	12.4857	-1.64135	93.5897	-0.123032
6.83767	80.8816	12.4844	-1.64222	93.5798	-0.123096
6.846	80.9701	12.4831	-1.64306	93.5699	-0.12316
6.85433	81.0541	12.4817	-1.64389	93.56	-0.123222
6.86267	81.1333	12.4804	-1.6447	93.5501	-0.123283
6.871	81.2186	12.4791	-1.64551	93.5402	-0.123343
6.87933	81.3011	12.4778	-1.64631	93.5302	-0.123404
6.88767	81.3807	12.4764	-1.64713	93.5202	-0.123465
6.896	81.4704	12.4751	-1.64794	93.5102	-0.123526
6.90433	81.5542	12.4738	-1.64871	93.5002	-0.123583
6.91267	81.6335	12.4724	-1.64945	93.4902	-0.123639
6.921	81.7144	12.4711	-1.65021	93.4801	-0.123696
6.92933	81.7971	12.4697	-1.65099	93.47	-0.123754
6.93767	81.8781	12.4684	-1.65175	93.46	-0.123811
6.946	81.9688	12.4671	-1.65251	93.45	-0.123868
6.95433	82.0448	12.4657	-1.65324	93.4399	-0.123923
6.96267	82.1265	12.4644	-1.65395	93.4298	-0.123976
6.971	82.2095	12.463	-1.65461	93.4194	-0.124025
6.97933	82.2984	12.4617	-1.65526	93.4094	-0.124074
6.98767	82.3742	12.4603	-1.65591	93.3995	-0.124123
6.996	82.4604	12.459	-1.65658	93.3895	-0.124173
7.00433	82.5445	12.4577	-1.65725	93.3795	-0.124223
7.01267	82.6243	12.4564	-1.65787	93.3697	-0.12427
7.021	82.7081	12.455	-1.65848	93.3597	-0.124315
7.02933	82.7884	12.4537	-1.65907	93.3497	-0.124359
7.03767	82.8738	12.4524	-1.65965	93.34	-0.124403
7.046	82.9562	12.4511	-1.66021	93.3302	-0.124445
7.05433	83.0434	12.4498	-1.66081	93.3205	-0.12449
7.06267	83.1237	12.4485	-1.66134	93.3107	-0.12453
7.071	83.2039	12.4472	-1.66186	93.3008	-0.124569
7.07933	83.2891	12.4458	-1.66234	93.2909	-0.124605
7.08767	83.3729	12.4445	-1.66278	93.281	-0.124638
7.096	83.4569	12.4432	-1.66324	93.2711	-0.124672
7.10433	83.54	12.4419	-1.6637	93.2612	-0.124707
7.11267	83.6234	12.4406	-1.66416	93.2516	-0.124741
7.121	83.7084	12.4393	-1.66454	93.2419	-0.12477
7.12933	83.7872	12.438	-1.66494	93.2322	-0.1248
7.13767	83.8731	12.4367	-1.66529	93.2225	-0.124826
7.146	83.9579	12.4354	-1.66564	93.2127	-0.124852
7.15433	84.0374	12.4341	-1.66598	93.203	-0.124878
7.16267	84.1239	12.4328	-1.66635	93.1933	-0.124905
7.171	84.2039	12.4315	-1.66667	93.1837	-0.124929
7.17933	84.2847	12.4302	-1.66696	93.1739	-0.124951
7.18767	84.3683	12.429	-1.6672	93.1645	-0.124969
7.196	84.4493	12.4277	-1.66741	93.1549	-0.124984
7.20433	84.5332	12.4264	-1.66765	93.1453	-0.125003
7.21267	84.6205	12.4251	-1.66783	93.1357	-0.125016
7.221	84.7006	12.4239	-1.668	93.1261	-0.125029
7.22933	84.7826	12.4226	-1.66819	93.117	-0.125043
7.23767	84.8681	12.4214	-1.66829	93.1076	-0.125051
7.246	84.9484	12.4201	-1.66838	93.098	-0.125057
7.25433	85.0355	12.4189	-1.66844	93.0885	-0.125062
7.26267	85.1207	12.4176	-1.6685	93.0792	-0.125067
7.271	85.1992	12.4163	-1.66856	93.0697	-0.125071
7.27933	85.2862	12.4151	-1.66856	93.0601	-0.125071
7.28767	85.3651	12.4138	-1.66855	93.0506	-0.12507
7.296	85.4502	12.4125	-1.66854	93.0411	-0.125069
7.30433	85.5354	12.4113	-1.66846	93.0317	-0.125064
7.31267	85.6182	12.41	-1.66835	93.0224	-0.125055
7.321	85.6995	12.4088	-1.66826	93.0131	-0.125049
7.32933	85.7817	12.4076	-1.66811	93.0041	-0.125037
7.33767	85.8681	12.4064	-1.66798	92.9951	-0.125027
7.346	85.9495	12.4051	-1.66779	92.9858	-0.125013
7.35433	86.0356	12.4039	-1.66759	92.9768	-0.124998
7.36267	86.1157	12.4028	-1.66737	92.9679	-0.124982
7.371	86.2015	12.4016	-1.66713	92.9592	-0.124964
7.37933	86.2817	12.4004	-1.66685	92.9503	-0.124943
7.38767	86.358	12.3992	-1.66653	92.9414	-0.124919
7.396	86.446	12.398	-1.6662	92.9325	-0.124894
7.40433	86.5331	12.3969	-1.66583	92.9238	-0.124866
7.41267	86.6158	12.3957	-1.66543	92.9148	-0.124836
7.421	86.7001	12.3945	-1.66503	92.9061	-0.124806
7.42933	86.7828	12.3933	-1.66459	92.8974	-0.124774
7.43767	86.8638	12.3922	-1.66413	92.8884	-0.124739
7.446	86.9474	12.391	-1.66366	92.8794	-0.124704
7.45433	87.03	12.3898	-1.66316	92.8705	-0.124666
7.46267	87.1168	12.3886	-1.66266	92.8618	-0.124628
7.471	87.1992	12.3874	-1.66213	92.853	-0.124589
7.47933	87.28	12.3863	-1.66155	92.8443	-0.124545
7.48767	87.3649	12.3851	-1.66096	92.8353	-0.124501
7.496	87.4493	12.3839	-1.66037	92.8269	-0.124457
7.50433	87.5399	12.3828	-1.65973	92.8183	-0.124409
7.51267	87.6217	12.3817	-1.65906	92.81	-0.124359
7.521	87.704	12.3806	-1.65833	92.8018	-0.124305
7.52933	87.7892	12.3795	-1.6576	92.7934	-0.124249
7.53767	87.8709	12.3784	-1.65681	92.7851	-0.124191
7.546	87.9548	12.3773	-1.65597	92.7768	-0.124127
7.55433	88.0438	12.3762	-1.65516	92.7686	-0.124067
7.56267	88.1255	12.3751	-1.65439	92.7604	-0.124009
7.571	88.2113	12.374	-1.65354	92.7524	-0.123945
7.57933	88.2924	12.3729	-1.65267	92.7441	-0.12388
7.58767	88.3769	12.3718	-1.65179	92.7357	-0.123814
7.596	88.4575	12.3707	-1.65086	92.7274	-0.123744
7.60433	88.5396	12.3696	-1.64993	92.7192	-0.123674
7.61267	88.6267	12.3685	-1.64896	92.7111	-0.123602
7.621	88.7157	12.3674	-1.64801	92.703	-0.123531
7.62933	88.7953	12.3664	-1.64707	92.6952	-0.12346
7.63767	88.8819	12.3653	-1.64605	92.6871	-0.123383
7.646	88.9655	12.3642	-1.645	92.6791	-0.123305
7.65433	89.05	12.3631	-1.64397	92.671	-0.123228
7.66267	89.1339	12.3621	-1.64288	92.6629	-0.123146
7.671	89.2165	12.361	-1.64174	92.6551	-0.12306
7.67933	89.3033	12.36	-1.64065	92.6475	-0.122979
7.68767	89.3848	12.359	-1.63953	92.6396	-0.122895
7.696	89.4735	12.3579	-1.6384	92.6318	-0.12281
7.70433	89.5553	12.3569	-1.63724	92.6242	-0.122724
7.71267	89.6331	12.3558	-1.63605	92.6162	-0.122634
7.721	89.7249	12.3548	-1.63485	92.6087	-0.122544
7.72933	89.8037	12.3538	-1.63362	92.6009	-0.122452
7.73767	89.8896	12.3528	-1.63238	92.5935	-0.122359
7.746	89.9723	12.3518	-1.63112	92.5861	-0.122264
7.75433	90.0582	12.3508	-1.62987	92.5786	-0.122171
7.76267	90.1416	12.3498	-1.62859	92.571	-0.122075
7.771	90.2254	12.3488	-1.62729	92.5636	-0.121978
7.77933	90.3125	12.3478	-1.62598	92.556	-0.121879
7.78767	90.3997	12.3468	-1.62462	92.5486	-0.121777
7.796	90.4848	12.3458	-1.62325	92.5413	-0.121675
7.80433	90.567	12.3449	-1.62192	92.534	-0.121575
7.81267	90.6481	12.3439	-1.62054	92.5267	-0.121472
7.821	90.7321	12.3429	-1.61916	92.5193	-0.121368
7.82933	90.815	12.3419	-1.61779	92.512	-0.121265
7.83767	90.8997	12.341	-1.61638	92.5049	-0.12116
7.846	90.9848	12.34	-1.61494	92.4977	-0.121052
7.85433	91.0699	12.3391	-1.61349	92.4905	-0.120943
7.86267	91.1521	12.3381	-1.61201	92.4833	-0.120832
7.871	91.24	12.3372	-1.61056	92.4762	-0.120724
7.87933	91.3219	12.3362	-1.60909	92.4692	-0.120614
7.88767	91.4116	12.3353	-1.60759	92.4621	-0.120501
7.896	91.4976	12.3343	-1.60607	92.4551	-0.120387
7.90433	91.579	12.3334	-1.60456	92.4479	-0.120274
7.91267	91.6634	12.3324	-1.60303	92.4406	-0.120159
7.921	91.744	12.3315	-1.60149	92.4335	-0.120043
7.92933	91.8258	12.3305	-1.59997	92.4264	-0.11993
7.93767	91.9129	12.3296	-1.59841	92.4196	-0.119813
7.946	91.9952	12.3287	-1.59686	92.4126	-0.119697
7.95433	92.0837	12.3277	-1.59533	92.4055	-0.119582
7.96267	92.1677	12.3268	-1.59376	92.3986	-0.119464
7.971	92.248	12.3259	-1.59218	92.3916	-0.119346
7.97933	92.3372	12.3249	-1.5906	92.3847	-0.119227
7.98767	92.4204	12.324	-1.58898	92.3779	-0.119106
7.996	92.5085	12.3231	-1.58735	92.371	-0.118984
8.00433	92.5919	12.3222	-1.58574	92.3642	-0.118863
8.01267	92.6777	12.3213	-1.5841	92.3575	-0.11874
8.021	92.7607	12.3204	-1.58248	92.3508	-0.118619
8.02933	92.8467	12.3195	-1.58082	92.3441	-0.118495
8.03767	92.9313	12.3187	-1.57913	92.3375	-0.118368
8.046	93.0199	12.3178	-1.57744	92.3307	-0.118241
8.05433	93.0992	12.3169	-1.57576	92.3241	-0.118115
8.06267	93.1872	12.316	-1.57412	92.3175	-0.117992
8.071	93.2713	12.3151	-1.57248	92.311	-0.117869
8.07933	93.357	12.3143	-1.57082	92.3046	-0.117745
8.08767	93.4394	12.3134	-1.56913	92.2981	-0.117618
8.096	93.5256	12.3125	-1.56745	92.2915	-0.117492
8.10433	93.6119	12.3116	-1.56576	92.2849	-0.117366
8.11267	93.693	12.3108	-1.56409	92.2783	-0.11724
8.121	93.7811	12.3099	-1.56241	92.272	-0.117114
8.12933	93.866	12.3091	-1.56073	92.2657	-0.116989
8.13767	93.9495	12.3082	-1.55908	92.2594	-0.116865
8.146	94.037	12.3074	-1.55736	92.2528	-0.116736
8.15433	94.1198	12.3065	-1.55564	92.2465	-0.116607
8.16267	94.2084	12.3057	-1.55394	92.2401	-0.116479
8.171	94.2907	12.3048	-1.55226	92.2338	-0.116353
8.17933	94.3734	12.304	-1.55053	92.2274	-0.116223
8.18767	94.4614	12.3031	-1.54883	92.2212	-0.116097
8.196	94.5439	12.3023	-1.54712	92.2149	-0.115968
8.20433	94.63	12.3014	-1.54544	92.2083	-0.115842
8.21267	94.7149	12.3005	-1.54376	92.2017	-0.115716
8.221	94.7979	12.2997	-1.54202	92.1951	-0.115586
8.22933	94.8829	12.2988	-1.54032	92.1889	-0.115458
8.23767	94.9669	12.298	-1.53863	92.1825	-0.115332
8.246	95.0513	12.2971	-1.53693	92.1762	-0.115205
8.25433	95.1433	12.2963	-1.53522	92.1699	-0.115076
8.26267	95.2251	12.2955	-1.53354	92.1636	-0.11495
8.271	95.3092	12.2946	-1.53183	92.1573	-0.114822
8.27933	95.395	12.2938	-1.53017	92.151	-0.114698
8.28767	95.4832	12.293	-1.5285	92.1451	-0.114573
8.296	95.5625	12.2922	-1.52679	92.1389	-0.114444
8.30433	95.6449	12.2913	-1.52511	92.1328	-0.114318
8.31267	95.7292	12.2905	-1.52341	92.1267	-0.114191
8.321	95.8136	12.2897	-1.52173	92.1206	-0.114065
8.32933	95.8996	12.2889	-1.52006	92.1146	-0.11394
8.33767	95.9836	12.2881	-1.51841	92.1086	-0.113816
8.346	96.066	12.2873	-1.51676	92.1024	-0.113693
8.35433	96.1509	12.2865	-1.51512	92.0963	-0.113569
8.36267	96.234	12.2857	-1.51345	92.0905	-0.113444
8.371	96.3251	12.2849	-1.51175	92.0846	-0.113317
8.37933	96.4073	12.2841	-1.51009	92.0786	-0.113193
8.38767	96.4902	12.2833	-1.50845	92.0725	-0.11307
8.396	96.5775	12.2825	-1.50682	92.0665	-0.112948
8.40433	96.6642	12.2817	-1.50519	92.0605	-0.112826
8.41267	96.7461	12.2809	-1.50356	92.0543	-0.112703
8.421	96.8343	12.2801	-1.5019	92.0482	-0.112579
8.42933	96.9109	12.2793	-1.50025	92.0422	-0.112455
8.43767	96.9981	12.2785	-1.4986	92.0364	-0.112332
8.446	97.0838	12.2777	-1.49695	92.0304	-0.112207
8.45433	97.1689	12.2768	-1.49533	92.0242	-0.112086
8.46267	97.2525	12.276	-1.49372	92.0182	-0.111966
8.471	97.341	12.2752	-1.49207	92.0122	-0.111842
8.47933	97.4224	12.2745	-1.49045	92.0063	-0.11172
8.48767	97.5095	12.2737	-1.48881	92.0006	-0.111598
8.496	97.592	12.2729	-1.4872	91.9947	-0.111476
8.50433	97.6788	12.2721	-1.48559	91.9888	-0.111356
8.51267	97.7663	12.2713	-1.48398	91.9828	-0.111236
8.521	97.8489	12.2705	-1.4824	91.9768	-0.111117
8.52933	97.9357	12.2697	-1.48084	91.9707	-0.111
8.53767	98.0199	12.269	-1.47926	91.9649	-0.110881
8.546	98.1053	12.2682	-1.47769	91.9592	-0.110764
8.55433	98.1915	12.2674	-1.47615	91.9532	-0.110649
8.56267	98.2732	12.2666	-1.4746	91.9472	-0.110533
8.571	98.3573	12.2658	-1.47305	91.9411	-0.110416
8.57933	98.446	12.265	-1.47148	91.9353	-0.110298
8.58767	98.53	12.2642	-1.46993	91.9293	-0.110182
8.596	98.6128	12.2634	-1.46836	91.9236	-0.110064
8.60433	98.7032	12.2626	-1.46678	91.9176	-0.109946
8.61267	98.7846	12.2619	-1.46523	91.912	-0.10983
8.621	98.867	12.2611	-1.46368	91.9062	-0.109714
8.62933	98.9558	12.2604	-1.46214	91.9005	-0.109598
8.63767	99.0387	12.2596	-1.4606	91.8948	-0.109483
8.646	99.1226	12.2589	-1.45905	91.8893	-0.109367
8.65433	99.2118	12.2581	-1.45752	91.8836	-0.109252
8.66267	99.295	12.2574	-1.45601	91.8781	-0.109139
8.671	99.3773	12.2566	-1.45453	91.8724	-0.109028
8.67933	99.4631	12.2558	-1.45303	91.8667	-0.108915
8.68767	99.5488	12.2551	-1.45151	91.8613	-0.108802
8.696	99.6306	12.2544	-1.45002	91.8555	-0.10869
8.70433	99.7199	12.2536	-1.44853	91.8499	-0.108578
8.71267	99.8038	12.2529	-1.44706	91.8444	-0.108468
8.721	99.89	12.2521	-1.44558	91.8388	-0.108357
8.72933	99.9752	12.2514	-1.44413	91.8333	-0.108249
8.73767	100.06	12.2506	-1.4427	91.8276	-0.108141
8.746	100.144	12.2499	-1.44123	91.8219	-0.108031
8.75433	100.227	12.2491	-1.43976	91.8162	-0.107921
8.76267	100.309	12.2484	-1.43832	91.8107	-0.107813
8.771	100.396	12.2476	-1.43692	91.8051	-0.107708
8.77933	100.483	12.2469	-1.43551	91.7995	-0.107602
8.78767	100.563	12.2461	-1.43405	91.7939	-0.107493
8.796	100.653	12.2454	-1.43257	91.7882	-0.107382
8.80433	100.734	12.2446	-1.43114	91.7826	-0.107275
8.81267	100.823	12.2438	-1.42969	91.7767	-0.107166
8.821	100.909	12.2431	-1.42823	91.7712	-0.107057
8.82933	100.992	12.2424	-1.42682	91.7658	-0.106951
8.83767	101.079	12.2417	-1.42542	91.7604	-0.106846
8.846	101.162	12.2409	-1.42399	91.7548	-0.106739
8.85433	101.245	12.2402	-1.42257	91.7492	-0.106632
8.86267	101.334	12.2395	-1.42114	91.7439	-0.106525
8.871	101.418	12.2387	-1.41978	91.7383	-0.106423
8.87933	101.504	12.238	-1.4184	91.7329	-0.10632
8.88767	101.588	12.2373	-1.41699	91.7275	-0.106214
8.896	101.671	12.2365	-1.41563	91.722	-0.106112
8.90433	101.762	12.2358	-1.41426	91.7165	-0.106009
8.91267	101.843	12.2351	-1.41288	91.711	-0.105906
8.921	101.926	12.2343	-1.41148	91.7055	-0.105801
8.92933	102.012	12.2336	-1.41012	91.7003	-0.105699
8.93767	102.1	12.2329	-1.40876	91.6949	-0.105597
8.946	102.179	12.2322	-1.40739	91.6894	-0.105494
8.95433	102.266	12.2315	-1.40606	91.6841	-0.105395
8.96267	102.348	12.2308	-1.40471	91.6787	-0.105294
8.971	102.437	12.2301	-1.40335	91.6734	-0.105192
8.97933	102.521	12.2294	-1.40199	91.6682	-0.10509
8.98767	102.603	12.2287	-1.40063	91.663	-0.104988
8.996	102.689	12.228	-1.39932	91.6577	-0.10489
9.00433	102.774	12.2272	-1.398	91.6523	-0.10479
9.01267	102.863	12.2265	-1.39666	91.6467	-0.10469
9.021	102.945	12.2258	-1.39537	91.6413	-0.104594
9.02933	103.03	12.2251	-1.39409	91.6362	-0.104497
9.03767	103.116	12.2243	-1.39274	91.6306	-0.104396
9.046	103.201	12.2236	-1.3914	91.6252	-0.104296
9.05433	103.286	12.2229	-1.39012	91.6198	-0.1042
9.06267	103.37	12.2222	-1.38882	91.6143	-0.104102
9.071	103.457	12.2215	-1.38752	91.6089	-0.104005
9.07933	103.544	12.2207	-1.38621	91.6036	-0.103907
9.08767	103.626	12.2201	-1.38492	91.5985	-0.10381
9.096	103.71	12.2194	-1.38363	91.5933	-0.103713
9.10433	103.798	12.2187	-1.38228	91.588	-0.103612
9.11267	103.878	12.218	-1.38094	91.5827	-0.103512
9.121	103.971	12.2173	-1.37966	91.5776	-0.103416
9.12933	104.052	12.2166	-1.37841	91.5723	-0.103322
9.13767	104.138	12.2159	-1.37714	91.5671	-0.103227
9.146	104.223	12.2152	-1.37592	91.5618	-0.103135
9.15433	104.308	12.2145	-1.37468	91.5566	-0.103043
9.16267	104.393	12.2138	-1.37338	91.5515	-0.102945
9.171	104.474	12.2131	-1.3721	91.546	-0.102849
9.17933	104.563	12.2124	-1.3708	91.5408	-0.102752
9.18767	104.644	12.2117	-1.36956	91.5357	-0.102659
9.196	104.731	12.211	-1.36833	91.5306	-0.102567
9.20433	104.818	12.2103	-1.36705	91.5254	-0.10247
9.21267	104.9	12.2096	-1.36576	91.5203	-0.102374
9.221	104.987	12.2089	-1.36449	91.5152	-0.102279
9.22933	105.074	12.2083	-1.36318	91.5103	-0.102181
9.23767	105.155	12.2076	-1.36188	91.5051	-0.102083
9.246	105.241	12.207	-1.36064	91.5002	-0.10199
9.25433	105.329	12.2063	-1.35939	91.4952	-0.101896
9.26267	105.414	12.2056	-1.35816	91.4901	-0.101804
9.271	105.498	12.2049	-1.35691	91.4849	-0.101711
9.27933	105.584	12.2043	-1.35563	91.48	-0.101614
9.28767	105.67	12.2036	-1.3544	91.4749	-0.101522
9.296	105.751	12.2029	-1.35317	91.4699	-0.10143
9.30433	105.837	12.2022	-1.35195	91.4647	-0.101339
9.31267	105.924	12.2015	-1.35074	91.4594	-0.101248
9.321	106.01	12.2008	-1.34956	91.4544	-0.10116
9.32933	106.093	12.2001	-1.34837	91.449	-0.10107
9.33767	106.18	12.1994	-1.34716	91.4438	-0.10098
9.346	106.265	12.1988	-1.34598	91.4388	-0.100892
9.35433	106.35	12.1981	-1.34477	91.4337	-0.1008
9.36267	106.428	12.1974	-1.34362	91.4285	-0.100714
9.371	106.514	12.1967	-1.34242	91.4234	-0.100624
9.37933	106.604	12.196	-1.34122	91.4183	-0.100535
9.38767	106.689	12.1954	-1.34005	91.4135	-0.100447
9.396	106.773	12.1947	-1.33888	91.4086	-0.100359
9.40433	106.856	12.194	-1.33767	91.4034	-0.100268
9.41267	106.938	12.1934	-1.33646	91.3986	-0.100177
9.421	107.027	12.1928	-1.33531	91.3938	-0.100091
9.42933	107.108	12.1921	-1.33416	91.3887	-0.100005
9.43767	107.196	12.1914	-1.33301	91.3837	-0.0999189
9.446	107.279	12.1908	-1.33183	91.3788	-0.0998304
9.45433	107.362	12.1901	-1.3307	91.3738	-0.0997457
9.46267	107.45	12.1894	-1.32958	91.3689	-0.0996616
9.471	107.534	12.1888	-1.32839	91.3638	-0.0995729
9.47933	107.621	12.1881	-1.32721	91.3589	-0.0994843
9.48767	107.705	12.1874	-1.32608	91.354	-0.0993993
9.496	107.79	12.1868	-1.32496	91.3489	-0.099316
9.50433	107.872	12.1861	-1.3238	91.344	-0.0992291
9.51267	107.958	12.1854	-1.32264	91.339	-0.0991417
9.521	108.04	12.1848	-1.32147	91.334	-0.099054
9.52933	108.132	12.1841	-1.32032	91.3291	-0.098968
9.53767	108.214	12.1835	-1.31916	91.3243	-0.0988813
9.546	108.299	12.1828	-1.31803	91.3193	-0.0987965
9.55433	108.379	12.1822	-1.31691	91.3143	-0.0987125
9.56267	108.466	12.1815	-1.31578	91.3095	-0.0986274
9.571	108.549	12.1809	-1.31468	91.3047	-0.0985449
9.57933	108.64	12.1802	-1.31357	91.2999	-0.0984617
9.58767	108.724	12.1796	-1.31245	91.295	-0.098378
9.596	108.808	12.179	-1.31135	91.2903	-0.0982957
9.60433	108.892	12.1783	-1.31027	91.2855	-0.0982143
9.61267	108.976	12.1777	-1.30917	91.2806	-0.0981324
9.621	109.064	12.177	-1.3081	91.2759	-0.0980518
9.62933	109.146	12.1764	-1.30697	91.2714	-0.0979673
9.63767	109.232	12.1758	-1.30587	91.2667	-0.0978848
9.646	109.316	12.1751	-1.30478	91.2618	-0.0978031
9.65433	109.403	12.1745	-1.30369	91.2571	-0.0977213
9.66267	109.485	12.1739	-1.30262	91.2523	-0.097641
9.671	109.572	12.1732	-1.30157	91.2476	-0.0975625
9.67933	109.66	12.1726	-1.30049	91.2426	-0.0974817
9.68767	109.741	12.172	-1.29943	91.2379	-0.097402
9.696	109.824	12.1714	-1.29837	91.2334	-0.0973224
9.70433	109.912	12.1707	-1.29729	91.2283	-0.0972417
9.71267	109.999	12.17	-1.29624	91.2232	-0.0971625
9.721	110.078	12.1694	-1.29517	91.2185	-0.0970827
9.72933	110.166	12.1687	-1.2941	91.2137	-0.0970028
9.73767	110.253	12.1681	-1.29299	91.2089	-0.0969192
9.746	110.335	12.1675	-1.29187	91.2042	-0.0968354
9.75433	110.42	12.1669	-1.29078	91.1997	-0.0967534
9.76267	110.501	12.1663	-1.28972	91.1953	-0.096674
9.771	110.59	12.1656	-1.28867	91.1904	-0.0965956
9.77933	110.674	12.165	-1.28762	91.1857	-0.0965167
9.78767	110.762	12.1644	-1.28658	91.1813	-0.0964386
9.796	110.846	12.1638	-1.28553	91.1767	-0.0963598
9.80433	110.93	12.1632	-1.28451	91.172	-0.0962835
9.81267	111.018	12.1626	-1.28348	91.1675	-0.0962068
9.821	111.096	12.1619	-1.28246	91.1628	-0.0961301
9.82933	111.183	12.1613	-1.28145	91.1581	-0.0960545
9.83767	111.267	12.1607	-1.28045	91.1533	-0.0959796
9.846	111.354	12.16	-1.27946	91.1486	-0.0959048
9.85433	111.438	12.1594	-1.27843	91.1439	-0.095828
9.86267	111.521	12.1588	-1.27741	91.1392	-0.0957517
9.871	111.606	12.1582	-1.2764	91.1346	-0.095676
9.87933	111.691	12.1576	-1.27542	91.13	-0.0956021
9.88767	111.768	12.1569	-1.27436	91.1253	-0.0955229
9.896	111.863	12.1563	-1.27334	91.1206	-0.0954461
9.90433	111.945	12.1557	-1.27237	91.1159	-0.0953736
9.91267	112.027	12.1551	-1.27136	91.1113	-0.0952978
9.921	112.109	12.1545	-1.27033	91.1067	-0.0952204
9.92933	112.194	12.1538	-1.26931	91.102	-0.0951446
9.93767	112.284	12.1532	-1.26833	91.0975	-0.0950711
9.946	112.371	12.1526	-1.26737	91.0931	-0.0949986
9.95433	112.447	12.152	-1.26639	91.0885	-0.0949252
9.96267	112.53	12.1514	-1.26538	91.0839	-0.0948496
9.971	112.621	12.1508	-1.26443	91.0793	-0.0947787
9.97933	112.703	12.1502	-1.26349	91.0748	-0.0947079
9.98767	112.79	12.1496	-1.26251	91.0703	-0.0946348
9.996	112.877	12.149	-1.26154	91.0657	-0.0945615
10.0043	112.961	12.1484	-1.26057	91.0612	-0.0944891
10.0127	113.042	12.1478	-1.2596	91.0568	-0.0944164
10.021	113.131	12.1472	-1.25865	91.0523	-0.0943453
10.0293	113.212	12.1466	-1.25765	91.0475	-0.0942706
10.0377	113.297	12.1459	-1.2567	91.0428	-0.0941989
10.046	113.378	12.1453	-1.25577	91.0382	-0.0941292
10.0543	113.466	12.1447	-1.25482	91.0338	-0.0940581
10.0627	113.555	12.1441	-1.25388	91.0292	-0.0939875
10.071	113.64	12.1435	-1.25294	91.025	-0.0939172
10.0793	113.719	12.143	-1.25203	91.0207	-0.0938487
10.0877	113.805	12.1424	-1.25111	91.0165	-0.0937798
10.096	113.888	12.1418	-1.25018	91.0119	-0.0937106
10.1043	113.977	12.1412	-1.2492	91.0075	-0.0936369
10.1127	114.065	12.1407	-1.24826	91.0032	-0.0935668
10.121	114.145	12.1401	-1.24735	90.9989	-0.093498
10.1293	114.226	12.1395	-1.24639	90.9945	-0.0934265
10.1377	114.313	12.1389	-1.24547	90.9901	-0.0933573
10.146	114.403	12.1383	-1.24454	90.9858	-0.0932873
10.1543	114.486	12.1377	-1.2436	90.9813	-0.0932167
10.1627	114.567	12.1371	-1.2427	90.9766	-0.0931498
10.171	114.651	12.1365	-1.2418	90.9718	-0.0930819
10.1793	114.74	12.1358	-1.24086	90.9673	-0.093012
10.1877	114.823	12.1353	-1.23998	90.9628	-0.0929455
10.196	114.908	12.1346	-1.23907	90.9582	-0.0928775
10.2043	114.99	12.1341	-1.23811	90.9538	-0.0928058
10.2127	115.08	12.1334	-1.23723	90.9493	-0.0927395
10.221	115.166	12.1328	-1.23634	90.9446	-0.0926728
10.2293	115.249	12.1322	-1.23545	90.94	-0.0926066
10.2377	115.332	12.1317	-1.23458	90.9358	-0.092541
10.246	115.419	12.1311	-1.23369	90.9313	-0.0924743
10.2543	115.501	12.1305	-1.2328	90.9268	-0.0924073
10.2627	115.588	12.1299	-1.23193	90.9225	-0.092342
10.271	115.667	12.1293	-1.23105	90.9183	-0.0922764
10.2793	115.752	12.1288	-1.23019	90.914	-0.0922118
10.2877	115.832	12.1282	-1.22936	90.9098	-0.0921496
10.296	115.918	12.1276	-1.22849	90.9054	-0.0920849
10.3043	116.003	12.127	-1.22763	90.9011	-0.0920202
10.3127	116.087	12.1264	-1.22677	90.8967	-0.0919552
10.321	116.173	12.1258	-1.22592	90.8923	-0.0918918
10.3293	116.26	12.1253	-1.22506	90.888	-0.0918274
10.3377	116.34	12.1247	-1.22423	90.8837	-0.0917649
10.346	116.428	12.1241	-1.22337	90.8794	-0.0917006
10.3543	116.509	12.1235	-1.22253	90.8748	-0.0916374
10.3627	116.594	12.1229	-1.22167	90.8703	-0.0915731
10.371	116.678	12.1223	-1.22079	90.8658	-0.0915075
10.3793	116.762	12.1217	-1.21992	90.8615	-0.0914424
10.3877	116.845	12.1212	-1.21908	90.8571	-0.0913791
10.396	116.929	12.1206	-1.21822	90.8528	-0.0913148
10.4043	117.021	12.12	-1.21739	90.8484	-0.0912522
10.4127	117.104	12.1195	-1.21657	90.8443	-0.0911907
10.421	117.185	12.1189	-1.21573	90.84	-0.0911282
10.4293	117.268	12.1183	-1.21494	90.8358	-0.0910685
10.4377	117.356	12.1178	-1.21415	90.8317	-0.0910093
10.446	117.44	12.1172	-1.21336	90.8275	-0.0909507
10.4543	117.523	12.1166	-1.21257	90.8233	-0.0908915
10.4627	117.609	12.1161	-1.21179	90.8189	-0.0908326
10.471	117.697	12.1155	-1.21097	90.8145	-0.0907716
10.4793	117.776	12.1149	-1.21018	90.8101	-0.0907117
10.4877	117.867	12.1143	-1.20936	90.8058	-0.0906508
10.496	117.948	12.1137	-1.20853	90.8015	-0.0905886
10.5043	118.03	12.1132	-1.2077	90.7972	-0.0905264
10.5127	118.117	12.1126	-1.2069	90.793	-0.0904664
10.521	118.203	12.112	-1.20612	90.7887	-0.0904075
10.5293	118.282	12.1115	-1.20534	90.7844	-0.0903489
10.5377	118.367	12.1109	-1.20455	90.7799	-0.0902901
10.546	118.448	12.1103	-1.20378	90.7757	-0.0902321
10.5543	118.537	12.1098	-1.20301	90.7716	-0.0901743
10.5627	118.623	12.1092	-1.20222	90.7674	-0.0901157
10.571	118.704	12.1086	-1.20143	90.7633	-0.0900562
10.5793	118.79	12.1081	-1.20066	90.759	-0.0899984
10.5877	118.867	12.1075	-1.19992	90.7546	-0.0899427
10.596	118.954	12.1069	-1.19915	90.7501	-0.089885
10.6043	119.041	12.1063	-1.19835	90.7458	-0.0898256
10.6127	119.126	12.1057	-1.19758	90.7416	-0.0897674
10.621	119.211	12.1052	-1.19682	90.7373	-0.0897108
10.6293	119.296	12.1046	-1.19606	90.733	-0.0896537
10.6377	119.379	12.104	-1.19531	90.7288	-0.0895971
10.646	119.465	12.1035	-1.19454	90.7247	-0.0895398
10.6543	119.545	12.1029	-1.1938	90.7204	-0.0894841
10.6627	119.63	12.1023	-1.19306	90.7161	-0.0894284
10.671	119.72	12.1018	-1.19228	90.7117	-0.0893705
10.6793	119.803	12.1012	-1.19153	90.7077	-0.0893139
10.6877	119.889	12.1007	-1.19078	90.7038	-0.089258
10.696	119.974	12.1001	-1.19002	90.6996	-0.089201
10.7043	120.056	12.0996	-1.18928	90.6954	-0.0891458
10.7127	120.144	12.099	-1.18855	90.6913	-0.0890905
10.721	120.224	12.0985	-1.18782	90.6871	-0.0890356
10.7293	120.311	12.0979	-1.18713	90.6829	-0.0889845
10.7377	120.39	12.0974	-1.18645	90.6789	-0.0889333
10.746	120.478	12.0968	-1.18575	90.6746	-0.0888809
10.7543	120.561	12.0963	-1.18507	90.6706	-0.0888301
10.7627	120.643	12.0957	-1.18438	90.6665	-0.0887782
10.771	120.731	12.0952	-1.18367	90.6622	-0.0887252
10.7793	120.813	12.0946	-1.18299	90.6581	-0.0886742
10.7877	120.894	12.0941	-1.18229	90.654	-0.0886213
10.796	120.981	12.0935	-1.1816	90.6497	-0.0885699
10.8043	121.065	12.0929	-1.18094	90.6454	-0.08852
10.8127	121.15	12.0924	-1.18029	90.6413	-0.0884714
10.821	121.228	12.0918	-1.17961	90.6371	-0.0884207
10.8293	121.315	12.0913	-1.17894	90.6329	-0.0883705
10.8377	121.398	12.0907	-1.17829	90.629	-0.0883218
10.846	121.484	12.0901	-1.17763	90.6247	-0.0882725
10.8543	121.565	12.0896	-1.17702	90.6204	-0.0882268
10.8627	121.65	12.089	-1.1764	90.6164	-0.0881797
10.871	121.732	12.0885	-1.17578	90.6123	-0.0881333
10.8793	121.815	12.088	-1.17515	90.6083	-0.0880859
10.8877	121.895	12.0874	-1.17451	90.6043	-0.0880383
10.896	121.989	12.0869	-1.17385	90.6001	-0.0879884
10.9043	122.072	12.0863	-1.17319	90.5961	-0.0879395
10.9127	122.153	12.0858	-1.17257	90.5922	-0.0878932
10.921	122.243	12.0853	-1.17192	90.588	-0.0878444
10.9293	122.319	12.0847	-1.17127	90.5841	-0.0877952
10.9377	122.404	12.0842	-1.17058	90.5802	-0.087744
10.946	122.489	12.0837	-1.16995	90.576	-0.0876968
10.9543	122.574	12.0831	-1.1693	90.5719	-0.0876477
10.9627	122.657	12.0826	-1.16866	90.5679	-0.0875995
10.971	122.74	12.082	-1.16801	90.5638	-0.0875514
10.9793	122.823	12.0815	-1.16736	90.5596	-0.0875023
10.9877	122.907	12.0809	-1.16671	90.5554	-0.0874539
10.996	122.997	12.0804	-1.16606	90.5513	-0.0874047
11.0043	123.078	12.0798	-1.16547	90.5473	-0.0873609
11.0127	123.16	12.0793	-1.16488	90.5432	-0.0873167
11.021	123.247	12.0787	-1.16427	90.5389	-0.0872706
11.0293	123.331	12.0782	-1.16364	90.5347	-0.0872236
11.0377	123.418	12.0776	-1.16304	90.5309	-0.0871788
11.046	123.498	12.0771	-1.16246	90.5267	-0.0871351
11.0543	123.581	12.0765	-1.16186	90.5227	-0.0870899
11.0627	123.67	12.076	-1.16126	90.5189	-0.087045
11.071	123.751	12.0755	-1.16066	90.5149	-0.0870002
11.0793	123.838	12.075	-1.16004	90.5109	-0.086954
11.0877	123.918	12.0744	-1.15939	90.5068	-0.0869048
11.096	124.007	12.0739	-1.15875	90.5027	-0.0868572
11.1043	124.087	12.0734	-1.15816	90.4988	-0.0868125
11.1127	124.175	12.0728	-1.15756	90.4949	-0.086768
11.121	124.259	12.0723	-1.15694	90.4907	-0.0867215
11.1293	124.338	12.0717	-1.15632	90.4868	-0.086675
11.1377	124.426	12.0712	-1.15568	90.4826	-0.0866265
11.146	124.509	12.0706	-1.15506	90.4784	-0.0865803
11.1543	124.594	12.0701	-1.15446	90.4743	-0.0865356
11.1627	124.676	12.0695	-1.15389	90.47	-0.086493
11.171	124.759	12.0689	-1.15334	90.4658	-0.0864516
11.1793	124.843	12.0684	-1.15279	90.4619	-0.0864101
11.1877	124.929	12.0679	-1.15223	90.4577	-0.0863679
11.196	125.013	12.0673	-1.15165	90.4536	-0.0863245
11.2043	125.095	12.0668	-1.15109	90.4497	-0.0862826
11.2127	125.184	12.0663	-1.15051	90.4455	-0.0862395
11.221	125.262	12.0657	-1.14996	90.4416	-0.0861984
11.2293	125.35	12.0652	-1.14942	90.4375	-0.0861576
11.2377	125.432	12.0646	-1.14887	90.4335	-0.0861164
11.246	125.523	12.0641	-1.14831	90.4297	-0.0860742
11.2543	125.602	12.0636	-1.14771	90.4258	-0.0860297
11.2627	125.688	12.0631	-1.14711	90.4216	-0.0859843
11.271	125.774	12.0626	-1.14651	90.4179	-0.0859396
11.2793	125.858	12.062	-1.14593	90.414	-0.0858956
11.2877	125.94	12.0615	-1.14533	90.4101	-0.0858507
11.296	126.024	12.061	-1.14475	90.4061	-0.0858079
11.3043	126.112	12.0604	-1.14423	90.4021	-0.0857682
11.3127	126.197	12.0599	-1.14367	90.3981	-0.085727
11.321	126.274	12.0594	-1.14311	90.3942	-0.0856848
11.3293	126.362	12.0589	-1.14254	90.3902	-0.085642
11.3377	126.444	12.0583	-1.14202	90.3863	-0.085603
11.346	126.53	12.0578	-1.1415	90.3824	-0.0855643
11.3543	126.609	12.0573	-1.141	90.3784	-0.0855263
11.3627	126.697	12.0568	-1.14048	90.3746	-0.0854873
11.371	126.781	12.0562	-1.13998	90.3705	-0.08545
11.3793	126.864	12.0557	-1.13951	90.3665	-0.0854145
11.3877	126.943	12.0552	-1.13897	90.3627	-0.085374
11.396	127.033	12.0547	-1.13842	90.3587	-0.0853332
11.4043	127.115	12.0541	-1.13791	90.3548	-0.0852946
11.4127	127.198	12.0536	-1.13739	90.3506	-0.0852558
11.421	127.279	12.053	-1.13684	90.3464	-0.0852146
11.4293	127.363	12.0525	-1.13632	90.3425	-0.085176
11.4377	127.448	12.0519	-1.13577	90.3382	-0.0851346
11.446	127.533	12.0514	-1.13523	90.3341	-0.0850941
11.4543	127.612	12.0509	-1.13469	90.3302	-0.0850535
11.4627	127.699	12.0503	-1.13414	90.3262	-0.085012
11.471	127.784	12.0498	-1.13365	90.3222	-0.0849752
11.4793	127.869	12.0493	-1.13314	90.3183	-0.0849371
11.4877	127.955	12.0487	-1.13261	90.3143	-0.0848976
11.496	128.032	12.0482	-1.13207	90.3102	-0.0848575
11.5043	128.118	12.0477	-1.13156	90.3064	-0.0848186
11.5127	128.203	12.0472	-1.131	90.3025	-0.0847767
11.521	128.287	12.0466	-1.13046	90.2986	-0.0847364
11.5293	128.37	12.0461	-1.12996	90.2945	-0.0846986
11.5377	128.455	12.0456	-1.12946	90.2905	-0.0846615
11.546	128.543	12.045	-1.12894	90.2866	-0.0846225
11.5543	128.623	12.0445	-1.12839	90.2827	-0.0845813
11.5627	128.711	12.044	-1.12788	90.2786	-0.0845427
11.571	128.788	12.0434	-1.12737	90.2746	-0.0845047
11.5793	128.876	12.0429	-1.12685	90.2708	-0.0844658
11.5877	128.96	12.0424	-1.12635	90.267	-0.084428
11.596	129.044	12.0419	-1.12585	90.2629	-0.0843906
11.6043	129.127	12.0414	-1.12535	90.2591	-0.0843535
11.6127	129.214	12.0409	-1.12483	90.2553	-0.0843142
11.621	129.293	12.0404	-1.12431	90.2515	-0.0842753
11.6293	129.385	12.0398	-1.12382	90.2474	-0.0842388
11.6377	129.467	12.0393	-1.12334	90.2434	-0.0842025
11.646	129.548	12.0388	-1.12282	90.2396	-0.0841637
11.6543	129.629	12.0383	-1.12232	90.2359	-0.0841266
11.6627	129.716	12.0378	-1.12184	90.2323	-0.0840901
11.671	129.798	12.0373	-1.12131	90.2284	-0.0840503
11.6793	129.883	12.0368	-1.12081	90.2247	-0.0840134
11.6877	129.967	12.0363	-1.12033	90.2207	-0.0839769
11.696	130.054	12.0357	-1.11984	90.2169	-0.0839407
11.7043	130.134	12.0352	-1.11933	90.2129	-0.0839025
11.7127	130.219	12.0347	-1.1188	90.2091	-0.0838625
11.721	130.302	12.0342	-1.11827	90.2053	-0.0838228
11.7293	130.392	12.0337	-1.11779	90.2016	-0.0837866
11.7377	130.473	12.0332	-1.11726	90.1976	-0.083747
11.746	130.553	12.0326	-1.11677	90.1935	-0.08371
11.7543	130.633	12.0321	-1.11628	90.1896	-0.0836739
11.7627	130.72	12.0316	-1.1158	90.1856	-0.0836373
11.771	130.804	12.0311	-1.11529	90.1819	-0.0835993
11.7793	130.882	12.0306	-1.1148	90.1782	-0.0835625
11.7877	130.967	12.0301	-1.11431	90.1745	-0.0835258
11.796	131.053	12.0296	-1.11382	90.1708	-0.0834889
11.8043	131.134	12.0291	-1.11337	90.1671	-0.0834554
11.8127	131.221	12.0286	-1.11291	90.1633	-0.0834206
11.821	131.308	12.0281	-1.11244	90.1595	-0.083386
11.8293	131.393	12.0276	-1.11195	90.1561	-0.0833488
11.8377	131.475	12.0271	-1.11147	90.1523	-0.0833133
11.846	131.561	12.0266	-1.11099	90.1486	-0.0832768
11.8543	131.643	12.0261	-1.1105	90.1444	-0.08324
11.8627	131.728	12.0256	-1.10999	90.1405	-0.083202
11.871	131.811	12.025	-1.10948	90.1366	-0.083164
11.8793	131.895	12.0245	-1.10899	90.1327	-0.0831269
11.8877	131.978	12.024	-1.10842	90.129	-0.0830846
11.896	132.065	12.0235	-1.10788	90.1252	-0.0830436
11.9043	132.146	12.023	-1.10734	90.1216	-0.0830034
11.9127	132.232	12.0225	-1.10684	90.1177	-0.0829661
11.921	132.316	12.022	-1.1063	90.1139	-0.0829257
11.9293	132.402	12.0215	-1.10576	90.1103	-0.0828848
11.9377	132.488	12.0211	-1.10524	90.1067	-0.0828461
11.946	132.571	12.0206	-1.10472	90.103	-0.0828068
11.9543	132.653	12.02	-1.10418	90.0992	-0.0827667
11.9627	132.737	12.0196	-1.10364	90.0955	-0.0827264
11.971	132.821	12.0191	-1.10315	90.0918	-0.0826895
11.9793	132.903	12.0185	-1.10264	90.088	-0.082651
11.9877	132.991	12.018	-1.10211	90.0842	-0.0826117
11.996	133.071	12.0175	-1.10156	90.0804	-0.0825701
12.0043	133.155	12.017	-1.10106	90.0767	-0.0825327
12.0127	133.236	12.0165	-1.10055	90.0727	-0.0824941
12.021	133.318	12.016	-1.10002	90.069	-0.082455
12.0293	133.409	12.0155	-1.09948	90.0653	-0.0824145
12.0377	133.489	12.015	-1.09895	90.0617	-0.0823747
12.046	133.573	12.0145	-1.09843	90.058	-0.0823356
12.0543	133.66	12.014	-1.0979	90.0542	-0.0822954
12.0627	133.739	12.0135	-1.09736	90.0504	-0.0822549
12.071	133.821	12.013	-1.09679	90.0468	-0.082213
12.0793	133.912	12.0126	-1.09626	90.0432	-0.082173
12.0877	133.992	12.0121	-1.0957	90.0397	-0.0821311
12.096	134.076	12.0117	-1.09519	90.0364	-0.0820927
12.1043	134.163	12.0112	-1.09467	90.0328	-0.0820536
12.1127	134.246	12.0107	-1.09414	90.0292	-0.0820136
12.121	134.327	12.0102	-1.09362	90.0256	-0.0819751
12.1293	134.413	12.0097	-1.0931	90.022	-0.0819357
12.1377	134.493	12.0093	-1.09255	90.0186	-0.0818948
12.146	134.576	12.0089	-1.09199	90.0153	-0.0818529
12.1543	134.664	12.0084	-1.09147	90.0118	-0.0818141
12.1627	134.746	12.0079	-1.09095	90.0079	-0.0817748
12.171	134.832	12.0074	-1.09041	90.0041	-0.0817342
12.1793	134.913	12.0068	-1.08984	90.0002	-0.081692
12.1877	135	12.0063	-1.08929	89.9966	-0.0816502
12.196	135.083	12.0059	-1.08876	89.993	-0.081611
12.2043	135.167	12.0054	-1.08818	89.9893	-0.0815675
12.2127	135.251	12.0049	-1.08763	89.9855	-0.0815258
12.221	135.334	12.0044	-1.08705	89.9818	-0.0814823
12.2293	135.419	12.0039	-1.0865	89.978	-0.0814411
12.2377	135.506	12.0034	-1.08596	89.9744	-0.0814009
12.246	135.587	12.0029	-1.0854	89.9708	-0.0813585
12.2543	135.672	12.0024	-1.08484	89.9673	-0.0813167
12.2627	135.756	12.002	-1.08429	89.9639	-0.0812759
12.271	135.839	12.0015	-1.08373	89.9602	-0.0812338
12.2793	135.922	12.001	-1.08316	89.9565	-0.0811905
12.2877	136.008	12.0005	-1.08261	89.953	-0.0811497
12.296	136.093	12.0001	-1.08205	89.9495	-0.081108
12.3043	136.175	11.9996	-1.08151	89.9458	-0.0810672
12.3127	136.264	11.9991	-1.08094	89.9423	-0.0810243
12.321	136.345	11.9986	-1.08035	89.9387	-0.0809799
12.3293	136.424	11.9982	-1.07978	89.9352	-0.0809377
12.3377	136.513	11.9977	-1.0792	89.9316	-0.0808944
12.346	136.593	11.9972	-1.07862	89.9281	-0.0808505
12.3543	136.684	11.9968	-1.07804	89.9248	-0.0808068
12.3627	136.763	11.9963	-1.07747	89.9215	-0.0807643
12.371	136.846	11.9959	-1.0769	89.9181	-0.0807214
12.3793	136.932	11.9954	-1.0763	89.9147	-0.0806768
12.3877	137.017	11.995	-1.07574	89.9113	-0.0806344
12.396	137.1	11.9945	-1.07518	89.9079	-0.0805928
12.4043	137.185	11.994	-1.07461	89.9043	-0.0805503
12.4127	137.272	11.9936	-1.07402	89.901	-0.0805059
12.421	137.352	11.9931	-1.07345	89.8976	-0.0804629
12.4293	137.436	11.9927	-1.07285	89.8942	-0.0804184
12.4377	137.523	11.9922	-1.07229	89.8906	-0.0803764
12.446	137.602	11.9917	-1.07172	89.887	-0.0803333
12.4543	137.69	11.9913	-1.07114	89.8834	-0.0802899
12.4627	137.776	11.9908	-1.07057	89.8798	-0.0802471
12.471	137.858	11.9903	-1.06999	89.8765	-0.0802036
12.4793	137.941	11.9898	-1.06942	89.8728	-0.0801608
12.4877	138.023	11.9894	-1.06885	89.8696	-0.0801185
12.496	138.112	11.9889	-1.06828	89.8659	-0.0800753
12.5043	138.192	11.9885	-1.0677	89.8626	-0.0800319
12.5127	138.28	11.988	-1.06714	89.8591	-0.0799901
12.521	138.359	11.9876	-1.06654	89.8556	-0.0799449
12.5293	138.447	11.9871	-1.06594	89.8523	-0.0799003
12.5377	138.531	11.9867	-1.06537	89.849	-0.0798575
12.546	138.61	11.9862	-1.06479	89.8457	-0.0798143
12.5543	138.689	11.9858	-1.06421	89.8424	-0.0797703
12.5627	138.777	11.9853	-1.06362	89.8389	-0.0797266
12.571	138.868	11.9849	-1.063	89.8355	-0.0796802
12.5793	138.949	11.9844	-1.06241	89.8322	-0.0796356
12.5877	139.028	11.984	-1.06183	89.8286	-0.0795924
12.596	139.112	11.9835	-1.06124	89.8251	-0.0795482
12.6043	139.2	11.983	-1.06065	89.8218	-0.0795039
12.6127	139.284	11.9826	-1.06005	89.8186	-0.079459
12.621	139.372	11.9822	-1.05945	89.8152	-0.0794137
12.6293	139.453	11.9817	-1.05884	89.8119	-0.0793683
12.6377	139.534	11.9813	-1.05828	89.8086	-0.0793261
12.646	139.617	11.9809	-1.05768	89.8054	-0.0792813
12.6543	139.705	11.9804	-1.0571	89.802	-0.0792379
12.6627	139.789	11.98	-1.05652	89.799	-0.0791937
12.671	139.873	11.9796	-1.05592	89.7959	-0.0791489
12.6793	139.957	11.9792	-1.05533	89.7927	-0.0791047
12.6877	140.044	11.9787	-1.05475	89.7892	-0.079061
12.696	140.122	11.9782	-1.0542	89.7859	-0.0790203
12.7043	140.207	11.9778	-1.05367	89.7826	-0.0789801
12.7127	140.289	11.9774	-1.05311	89.7793	-0.0789382
12.721	140.374	11.9769	-1.05252	89.7758	-0.0788945
12.7293	140.46	11.9764	-1.05195	89.7724	-0.0788517
12.7377	140.545	11.976	-1.0514	89.7691	-0.0788101
12.746	140.625	11.9756	-1.05086	89.7658	-0.0787696
12.7543	140.71	11.9751	-1.05029	89.7625	-0.0787273
12.7627	140.793	11.9747	-1.04973	89.759	-0.078685
12.771	140.875	11.9742	-1.04918	89.7559	-0.0786436
12.7793	140.962	11.9738	-1.0486	89.7526	-0.0786001
12.7877	141.046	11.9734	-1.04801	89.7493	-0.0785564
12.796	141.128	11.9729	-1.04745	89.7458	-0.0785143
12.8043	141.212	11.9725	-1.04688	89.7426	-0.0784717
12.8127	141.298	11.972	-1.04632	89.7394	-0.0784297
12.821	141.385	11.9716	-1.04576	89.7362	-0.0783872
12.8293	141.467	11.9712	-1.04517	89.7328	-0.0783431
12.8377	141.549	11.9707	-1.04465	89.7293	-0.0783045
12.846	141.634	11.9703	-1.04411	89.726	-0.0782639
12.8543	141.716	11.9698	-1.04355	89.7226	-0.0782219
12.8627	141.801	11.9694	-1.04298	89.7193	-0.0781794
12.871	141.886	11.9689	-1.0424	89.716	-0.0781355
12.8793	141.97	11.9685	-1.04184	89.7128	-0.0780936
12.8877	142.055	11.9681	-1.04125	89.7098	-0.0780495
12.896	142.14	11.9677	-1.04066	89.7065	-0.0780055
12.9043	142.224	11.9672	-1.04011	89.7032	-0.0779639
12.9127	142.306	11.9668	-1.03956	89.7003	-0.0779229
12.921	142.394	11.9664	-1.03896	89.6972	-0.077878
12.9293	142.473	11.966	-1.03837	89.6942	-0.0778338
12.9377	142.556	11.9656	-1.03783	89.6913	-0.077793
12.946	142.648	11.9652	-1.03727	89.6883	-0.0777515
12.9543	142.73	11.9648	-1.03672	89.6853	-0.07771
12.9627	142.815	11.9644	-1.03617	89.6822	-0.077669
12.971	142.897	11.964	-1.03565	89.679	-0.0776299
12.9793	142.984	11.9636	-1.03511	89.676	-0.0775895
12.9877	143.065	11.9631	-1.0346	89.6727	-0.0775511
12.996	143.149	11.9627	-1.0341	89.6694	-0.0775136
13.0043	143.235	11.9623	-1.03357	89.6661	-0.0774741
13.0127	143.316	11.9619	-1.03305	89.663	-0.0774348
13.021	143.403	11.9614	-1.0325	89.6597	-0.0773937
13.0293	143.49	11.961	-1.03197	89.6565	-0.0773539
13.0377	143.572	11.9606	-1.03143	89.6534	-0.0773134
13.046	143.656	11.9602	-1.03089	89.6502	-0.0772728
13.0543	143.738	11.9597	-1.03037	89.647	-0.0772338
13.0627	143.82	11.9593	-1.02983	89.6437	-0.0771932
13.071	143.903	11.9589	-1.02929	89.6406	-0.0771527
13.0793	143.99	11.9584	-1.02876	89.6373	-0.0771131
13.0877	144.071	11.958	-1.02819	89.634	-0.0770708
13.096	144.156	11.9575	-1.02764	89.6307	-0.0770296
13.1043	144.237	11.9571	-1.02713	89.6275	-0.0769907
13.1127	144.326	11.9567	-1.02661	89.6242	-0.0769521
13.121	144.408	11.9562	-1.02614	89.6209	-0.0769165
13.1293	144.49	11.9558	-1.02562	89.6176	-0.0768778
13.1377	144.577	11.9554	-1.02509	89.6145	-0.0768378
13.146	144.665	11.955	-1.0246	89.6116	-0.0768013
13.1543	144.747	11.9546	-1.02408	89.6085	-0.0767627
13.1627	144.829	11.9542	-1.02355	89.6056	-0.0767224
13.171	144.911	11.9538	-1.02305	89.6027	-0.0766849
13.1793	144.998	11.9534	-1.02257	89.6	-0.076649
13.1877	145.081	11.953	-1.02203	89.597	-0.0766086
13.196	145.165	11.9526	-1.0215	89.594	-0.0765687
13.2043	145.25	11.9522	-1.02099	89.5908	-0.0765307
13.2127	145.335	11.9518	-1.02049	89.5878	-0.0764934
13.221	145.419	11.9514	-1.01999	89.5846	-0.0764558
13.2293	145.501	11.951	-1.01948	89.5814	-0.076418
13.2377	145.582	11.9505	-1.01896	89.5783	-0.0763788
13.246	145.669	11.9501	-1.01846	89.5752	-0.076341
13.2543	145.753	11.9497	-1.018	89.572	-0.0763066
13.2627	145.84	11.9492	-1.01751	89.5685	-0.07627
13.271	145.922	11.9488	-1.01704	89.5654	-0.0762346
13.2793	146.004	11.9484	-1.01656	89.5622	-0.0761989
13.2877	146.093	11.948	-1.01607	89.5592	-0.076162
13.296	146.175	11.9476	-1.01557	89.5559	-0.0761243
13.3043	146.259	11.9471	-1.0151	89.5527	-0.076089
13.3127	146.339	11.9467	-1.01461	89.5493	-0.0760528
13.321	146.423	11.9462	-1.01414	89.5461	-0.0760174
13.3293	146.509	11.9458	-1.01364	89.5428	-0.0759802
13.3377	146.591	11.9454	-1.01314	89.5395	-0.0759426
13.346	146.673	11.945	-1.01262	89.5365	-0.0759033
13.3543	146.762	11.9446	-1.01213	89.5334	-0.0758668
13.3627	146.841	11.9441	-1.01165	89.5302	-0.0758304
13.371	146.929	11.9437	-1.01116	89.5272	-0.0757942
13.3793	147.011	11.9433	-1.01069	89.5242	-0.0757585
13.3877	147.093	11.9429	-1.01019	89.5213	-0.0757211
13.396	147.18	11.9426	-1.00971	89.5186	-0.0756855
13.4043	147.264	11.9422	-1.00923	89.5157	-0.0756492
13.4127	147.346	11.9418	-1.00876	89.5129	-0.0756144
13.421	147.432	11.9415	-1.00828	89.5102	-0.075578
13.4293	147.514	11.9411	-1.00781	89.5073	-0.0755428
13.4377	147.603	11.9407	-1.00734	89.5045	-0.0755078
13.446	147.681	11.9403	-1.00688	89.5015	-0.0754735
13.4543	147.769	11.9399	-1.00639	89.4985	-0.0754362
13.4627	147.851	11.9395	-1.00592	89.4955	-0.0754013
13.471	147.937	11.9391	-1.00544	89.4925	-0.0753654
13.4793	148.022	11.9387	-1.00494	89.4893	-0.075328
13.4877	148.101	11.9383	-1.00448	89.4861	-0.0752931
13.496	148.186	11.9378	-1.00401	89.4829	-0.0752583
13.5043	148.275	11.9374	-1.00354	89.4796	-0.0752227
13.5127	148.357	11.9369	-1.00308	89.4763	-0.075188
13.521	148.442	11.9365	-1.00259	89.4728	-0.0751516
13.5293	148.525	11.9361	-1.00207	89.4698	-0.0751128
13.5377	148.609	11.9357	-1.0016	89.4668	-0.0750771
13.546	148.693	11.9352	-1.0011	89.4636	-0.0750402
13.5543	148.777	11.9348	-1.00062	89.4604	-0.0750042
13.5627	148.859	11.9344	-1.00018	89.4574	-0.0749706
13.571	148.944	11.934	-0.999673	89.4545	-0.074933
13.5793	149.024	11.9336	-0.999154	89.4513	-0.074894
13.5877	149.106	11.9332	-0.998646	89.4485	-0.0748559
13.596	149.194	11.9328	-0.998142	89.4455	-0.0748182
13.6043	149.279	11.9324	-0.99764	89.4426	-0.0747806
13.6127	149.365	11.9321	-0.997156	89.4398	-0.0747443
13.621	149.447	11.9317	-0.996659	89.4368	-0.074707
13.6293	149.532	11.9313	-0.996177	89.4339	-0.0746709
13.6377	149.621	11.9309	-0.995665	89.4311	-0.0746325
13.646	149.699	11.9305	-0.995148	89.4281	-0.0745937
13.6543	149.783	11.9301	-0.99465	89.4252	-0.0745565
13.6627	149.868	11.9297	-0.994148	89.4223	-0.0745188
13.671	149.95	11.9293	-0.993653	89.4194	-0.0744817
13.6793	150.035	11.929	-0.993178	89.4165	-0.0744461
13.6877	150.116	11.9286	-0.992681	89.4138	-0.0744088
13.696	150.2	11.9282	-0.992174	89.4107	-0.0743708
13.7043	150.286	11.9278	-0.991652	89.4078	-0.0743317
13.7127	150.37	11.9274	-0.991128	89.4048	-0.0742924
13.721	150.454	11.927	-0.990642	89.4019	-0.074256
13.7293	150.53	11.9266	-0.990125	89.3991	-0.0742172
13.7377	150.617	11.9263	-0.989605	89.3963	-0.0741783
13.746	150.702	11.9259	-0.989132	89.3935	-0.0741428
13.7543	150.787	11.9255	-0.988634	89.3907	-0.0741055
13.7627	150.873	11.9251	-0.988125	89.3876	-0.0740673
13.771	150.957	11.9247	-0.987645	89.3847	-0.0740313
13.7793	151.04	11.9244	-0.987127	89.3819	-0.0739925
13.7877	151.124	11.924	-0.986602	89.3791	-0.0739532
13.796	151.209	11.9236	-0.986077	89.3763	-0.0739138
13.8043	151.293	11.9232	-0.985522	89.3734	-0.0738723
13.8127	151.374	11.9228	-0.985009	89.3705	-0.0738337
13.821	151.457	11.9225	-0.984512	89.3677	-0.0737965
13.8293	151.545	11.9221	-0.983965	89.3649	-0.0737555
13.8377	151.627	11.9217	-0.983452	89.3621	-0.0737171
13.846	151.712	11.9214	-0.982919	89.3595	-0.0736771
13.8543	151.794	11.921	-0.98237	89.3565	-0.0736359
13.8627	151.874	11.9206	-0.981854	89.3536	-0.0735973
13.871	151.96	11.9202	-0.981362	89.3507	-0.0735604
13.8793	152.042	11.9198	-0.980852	89.3479	-0.0735222
13.8877	152.131	11.9194	-0.980354	89.3451	-0.0734848
13.896	152.214	11.9191	-0.979834	89.3424	-0.0734459
13.9043	152.297	11.9187	-0.979299	89.3398	-0.0734058
13.9127	152.381	11.9184	-0.978782	89.337	-0.073367
13.921	152.468	11.918	-0.978239	89.3341	-0.0733263
13.9293	152.549	11.9176	-0.977697	89.3312	-0.0732857
13.9377	152.634	11.9172	-0.977174	89.3286	-0.0732465
13.946	152.716	11.9169	-0.976656	89.3258	-0.0732076
13.9543	152.801	11.9165	-0.976091	89.3231	-0.0731653
13.9627	152.891	11.9162	-0.975541	89.3204	-0.0731241
13.971	152.972	11.9158	-0.975003	89.3178	-0.0730838
13.9793	153.055	11.9154	-0.974462	89.3148	-0.0730432
13.9877	153.138	11.915	-0.973899	89.3118	-0.073001
13.996	153.225	11.9146	-0.973353	89.3089	-0.0729601
14.0043	153.306	11.9142	-0.972814	89.306	-0.0729197
14.0127	153.392	11.9139	-0.972267	89.3033	-0.0728787
14.021	153.473	11.9135	-0.97172	89.3004	-0.0728376
14.0293	153.559	11.9131	-0.971165	89.2978	-0.0727961
14.0377	153.642	11.9128	-0.970626	89.2951	-0.0727556
14.046	153.726	11.9124	-0.970064	89.2923	-0.0727136
14.0543	153.811	11.912	-0.969518	89.2895	-0.0726726
14.0627	153.896	11.9117	-0.968977	89.2869	-0.0726321
14.071	153.979	11.9113	-0.968439	89.2842	-0.0725917
14.0793	154.063	11.911	-0.967858	89.2816	-0.0725482
14.0877	154.144	11.9106	-0.967305	89.2791	-0.0725067
14.096	154.232	11.9103	-0.966794	89.2767	-0.0724684
14.1043	154.315	11.91	-0.966261	89.2741	-0.0724284
14.1127	154.399	11.9096	-0.965719	89.2713	-0.0723878
14.121	154.485	11.9092	-0.96518	89.2686	-0.0723475
14.1293	154.564	11.9089	-0.964677	89.266	-0.0723097
14.1377	154.65	11.9085	-0.964151	89.2632	-0.0722703
14.146	154.731	11.9081	-0.963627	89.2605	-0.0722311
14.1543	154.815	11.9078	-0.963061	89.2578	-0.0721886
14.1627	154.903	11.9074	-0.962538	89.255	-0.0721494
14.171	154.986	11.907	-0.961994	89.2521	-0.0721086
14.1793	155.072	11.9066	-0.961414	89.2492	-0.0720652
14.1877	155.157	11.9063	-0.960837	89.2465	-0.0720219
14.196	155.239	11.9059	-0.960279	89.2439	-0.0719801
14.2043	155.321	11.9056	-0.959718	89.2412	-0.071938
14.2127	155.408	11.9052	-0.95914	89.2387	-0.0718947
14.221	155.494	11.9049	-0.958583	89.2362	-0.0718529
14.2293	155.58	11.9046	-0.957993	89.2336	-0.0718087
14.2377	155.668	11.9042	-0.957473	89.2309	-0.0717697
14.246	155.747	11.9039	-0.956942	89.2285	-0.07173
14.2543	155.83	11.9036	-0.956388	89.2261	-0.0716884
14.2627	155.915	11.9032	-0.955821	89.2237	-0.0716459
14.271	155.995	11.9029	-0.955273	89.2211	-0.0716049
14.2793	156.079	11.9026	-0.954738	89.2189	-0.0715648
14.2877	156.166	11.9023	-0.954208	89.2162	-0.071525
14.296	156.253	11.9019	-0.953641	89.2135	-0.0714825
14.3043	156.335	11.9015	-0.953056	89.2107	-0.0714387
14.3127	156.421	11.9012	-0.952501	89.2081	-0.0713971
14.321	156.5	11.9008	-0.951938	89.2056	-0.0713548
14.3293	156.587	11.9005	-0.95134	89.203	-0.07131
14.3377	156.668	11.9001	-0.950785	89.2004	-0.0712684
14.346	156.751	11.8998	-0.950229	89.1977	-0.0712268
14.3543	156.837	11.8994	-0.949678	89.195	-0.0711855
14.3627	156.919	11.899	-0.94912	89.192	-0.0711436
14.371	157.001	11.8987	-0.948539	89.1895	-0.0711001
14.3793	157.083	11.8983	-0.948006	89.1869	-0.0710601
14.3877	157.171	11.898	-0.947461	89.1843	-0.0710192
14.396	157.257	11.8977	-0.946925	89.1818	-0.0709791
14.4043	157.341	11.8973	-0.946394	89.1793	-0.0709393
14.4127	157.422	11.897	-0.945888	89.1768	-0.0709013
14.421	157.506	11.8966	-0.945329	89.1742	-0.0708595
14.4293	157.59	11.8963	-0.944792	89.1715	-0.0708192
14.4377	157.672	11.8959	-0.944257	89.169	-0.0707791
14.446	157.758	11.8956	-0.943709	89.1665	-0.0707381
14.4543	157.842	11.8953	-0.943175	89.1641	-0.070698
14.4627	157.925	11.895	-0.942608	89.1617	-0.0706555
14.471	158.01	11.8947	-0.942061	89.1593	-0.0706145
14.4793	158.095	11.8943	-0.941515	89.1567	-0.0705736
14.4877	158.18	11.894	-0.940961	89.1543	-0.0705321
14.496	158.268	11.8936	-0.940428	89.1517	-0.0704921
14.5043	158.346	11.8933	-0.939903	89.1493	-0.0704528
14.5127	158.429	11.893	-0.939371	89.1472	-0.0704129
14.521	158.515	11.8927	-0.938813	89.145	-0.0703711
14.5293	158.603	11.8924	-0.93827	89.1426	-0.0703304
14.5377	158.68	11.8921	-0.93771	89.1401	-0.0702884
14.546	158.768	11.8918	-0.937194	89.1377	-0.0702497
14.5543	158.852	11.8914	-0.936688	89.1351	-0.0702118
14.5627	158.934	11.8911	-0.936148	89.1326	-0.0701713
14.571	159.019	11.8908	-0.93561	89.1301	-0.0701309
14.5793	159.105	11.8904	-0.935053	89.1276	-0.0700892
14.5877	159.189	11.8901	-0.934507	89.1251	-0.0700483
14.596	159.274	11.8897	-0.933962	89.1224	-0.0700074
14.6043	159.355	11.8894	-0.933423	89.12	-0.069967
14.6127	159.438	11.8891	-0.932869	89.1177	-0.0699255
14.621	159.518	11.8887	-0.932348	89.1151	-0.0698864
14.6293	159.603	11.8884	-0.931827	89.1125	-0.0698473
14.6377	159.693	11.8881	-0.931304	89.1101	-0.0698082
14.646	159.775	11.8878	-0.93081	89.1079	-0.0697712
14.6543	159.861	11.8875	-0.930299	89.1054	-0.0697328
14.6627	159.94	11.8872	-0.929791	89.1031	-0.0696948
14.671	160.029	11.8869	-0.929285	89.1008	-0.0696569
14.6793	160.109	11.8865	-0.928768	89.0983	-0.0696181
14.6877	160.194	11.8861	-0.928271	89.0955	-0.0695809
14.696	160.278	11.8858	-0.92779	89.0927	-0.0695448
14.7043	160.359	11.8855	-0.927275	89.0904	-0.0695062
14.7127	160.448	11.8852	-0.926746	89.0881	-0.0694665
14.721	160.531	11.8848	-0.926204	89.0857	-0.0694259
14.7293	160.616	11.8845	-0.92566	89.0832	-0.0693851
14.7377	160.695	11.8841	-0.925145	89.0806	-0.0693465
14.746	160.783	11.8838	-0.924613	89.0779	-0.0693066
14.7543	160.868	11.8835	-0.9241	89.0754	-0.0692682
14.7627	160.949	11.8831	-0.923584	89.0729	-0.0692295
14.771	161.032	11.8828	-0.923074	89.0705	-0.0691913
14.7793	161.115	11.8825	-0.92254	89.0684	-0.0691513
14.7877	161.2	11.8822	-0.922046	89.066	-0.0691142
14.796	161.288	11.8819	-0.921553	89.0634	-0.0690773
14.8043	161.376	11.8815	-0.921043	89.061	-0.0690391
14.8127	161.454	11.8812	-0.920541	89.0585	-0.0690014
14.821	161.537	11.8809	-0.920028	89.0561	-0.068963
14.8293	161.623	11.8806	-0.919514	89.054	-0.0689244
14.8377	161.713	11.8803	-0.91901	89.0519	-0.0688867
14.846	161.794	11.88	-0.918519	89.0498	-0.0688499
14.8543	161.875	11.8797	-0.918007	89.0476	-0.0688115
14.8627	161.96	11.8794	-0.917529	89.0453	-0.0687756
14.871	162.044	11.8791	-0.917034	89.0429	-0.0687386
14.8793	162.13	11.8788	-0.916528	89.0404	-0.0687006
14.8877	162.215	11.8785	-0.916052	89.038	-0.0686649
14.896	162.296	11.8782	-0.915541	89.0358	-0.0686266
14.9043	162.376	11.8779	-0.915031	89.0339	-0.0685884
14.9127	162.46	11.8776	-0.914545	89.0318	-0.068552
14.921	162.544	11.8773	-0.914043	89.0292	-0.0685143
14.9293	162.631	11.877	-0.913561	89.0267	-0.0684782
14.9377	162.716	11.8766	-0.913072	89.0243	-0.0684415
14.946	162.802	11.8763	-0.912544	89.0217	-0.068402
14.9543	162.882	11.876	-0.912041	89.0194	-0.0683643
14.9627	162.967	11.8757	-0.911586	89.0173	-0.0683301
14.971	163.052	11.8754	-0.911105	89.0152	-0.0682941
14.9793	163.132	11.8751	-0.910629	89.0131	-0.0682584
14.9877	163.217	11.8748	-0.910155	89.0106	-0.0682229
14.996	163.299	11.8745	-0.909673	89.0081	-0.0681868
15.0043	163.386	11.8742	-0.90922	89.0058	-0.0681528
15.0127	163.476	11.8738	-0.908756	89.0033	-0.0681181
15.021	163.552	11.8735	-0.908317	89.001	-0.0680852
15.0293	163.634	11.8732	-0.907871	88.9988	-0.0680517
15.0377	163.72	11.8729	-0.907391	88.9965	-0.0680157
15.046	163.808	11.8726	-0.906888	88.9943	-0.067978
15.0543	163.887	11.8723	-0.906398	88.9919	-0.0679413
15.0627	163.975	11.872	-0.9059	88.9895	-0.067904
15.071	164.056	11.8717	-0.905393	88.9872	-0.0678659
15.0793	164.14	11.8714	-0.904902	88.9847	-0.0678291
15.0877	164.225	11.8711	-0.904405	88.9825	-0.0677919
15.096	164.308	11.8708	-0.903907	88.9802	-0.0677546
15.1043	164.392	11.8705	-0.903363	88.978	-0.0677138
15.1127	164.474	11.8702	-0.902868	88.9756	-0.0676767
15.121	164.56	11.8698	-0.902424	88.9732	-0.0676434
15.1293	164.645	11.8695	-0.901955	88.9709	-0.0676082
15.1377	164.726	11.8692	-0.901485	88.9685	-0.067573
15.146	164.806	11.8689	-0.901048	88.9663	-0.0675403
15.1543	164.892	11.8686	-0.900596	88.964	-0.0675064
15.1627	164.98	11.8683	-0.900123	88.9618	-0.0674709
15.171	165.063	11.868	-0.899606	88.9594	-0.0674322
15.1793	165.148	11.8677	-0.899133	88.9573	-0.0673967
15.1877	165.228	11.8674	-0.898708	88.9552	-0.0673649
15.196	165.314	11.8671	-0.898236	88.9531	-0.0673295
15.2043	165.399	11.8668	-0.897748	88.9508	-0.0672929
15.2127	165.484	11.8666	-0.897278	88.9488	-0.0672577
15.221	165.567	11.8663	-0.896814	88.9465	-0.0672229
15.2293	165.654	11.8659	-0.896331	88.9441	-0.0671867
15.2377	165.736	11.8656	-0.895876	88.9418	-0.0671526
15.246	165.815	11.8653	-0.895438	88.9397	-0.0671197
15.2543	165.902	11.8651	-0.895011	88.9375	-0.0670877
15.2627	165.986	11.8648	-0.894539	88.9354	-0.0670524
15.271	166.066	11.8644	-0.894066	88.9329	-0.0670169
15.2793	166.153	11.8641	-0.893609	88.9306	-0.0669827
15.2877	166.242	11.8639	-0.89315	88.9285	-0.0669483
15.296	166.318	11.8636	-0.892679	88.9262	-0.0669129
15.3043	166.403	11.8633	-0.892202	88.9241	-0.0668772
15.3127	166.486	11.863	-0.891733	88.922	-0.066842
15.321	166.57	11.8627	-0.891247	88.9198	-0.0668056
15.3293	166.653	11.8624	-0.89077	88.9175	-0.0667699
15.3377	166.738	11.8621	-0.890312	88.9155	-0.0667355
15.346	166.822	11.8618	-0.889831	88.9131	-0.0666995
15.3543	166.908	11.8615	-0.889362	88.9109	-0.0666643
15.3627	166.992	11.8612	-0.888919	88.9086	-0.0666311
15.371	167.075	11.8609	-0.88846	88.9063	-0.0665967
15.3793	167.161	11.8606	-0.888014	88.904	-0.0665633
15.3877	167.242	11.8603	-0.887563	88.9018	-0.0665294
15.396	167.325	11.86	-0.887112	88.8997	-0.0664956
15.4043	167.41	11.8597	-0.886683	88.8975	-0.0664635
15.4127	167.494	11.8594	-0.886224	88.8953	-0.0664291
15.421	167.581	11.8591	-0.885774	88.8931	-0.0663954
15.4293	167.663	11.8589	-0.885318	88.8911	-0.0663612
15.4377	167.744	11.8586	-0.884865	88.8891	-0.0663273
15.446	167.83	11.8584	-0.884385	88.8873	-0.0662913
15.4543	167.917	11.8581	-0.883943	88.885	-0.0662581
15.4627	167.998	11.8577	-0.883489	88.8827	-0.0662241
15.471	168.083	11.8575	-0.883032	88.8807	-0.0661898
15.4793	168.167	11.8572	-0.882587	88.8786	-0.0661565
15.4877	168.248	11.8569	-0.882124	88.8764	-0.0661218
15.496	168.334	11.8566	-0.881672	88.8743	-0.0660879
15.5043	168.417	11.8563	-0.88122	88.8719	-0.066054
15.5127	168.5	11.856	-0.880807	88.8695	-0.0660231
15.521	168.582	11.8557	-0.880378	88.8672	-0.0659909
15.5293	168.667	11.8554	-0.879965	88.8648	-0.06596
15.5377	168.748	11.8551	-0.879542	88.8626	-0.0659282
15.546	168.835	11.8548	-0.879112	88.8603	-0.065896
15.5543	168.923	11.8544	-0.878675	88.8578	-0.0658632
15.5627	169.003	11.8541	-0.878261	88.8555	-0.0658322
15.571	169.083	11.8539	-0.877841	88.8536	-0.0658007
15.5793	169.171	11.8536	-0.877407	88.8516	-0.0657682
15.5877	169.254	11.8534	-0.876974	88.8497	-0.0657357
15.596	169.334	11.8531	-0.876529	88.8478	-0.0657024
15.6043	169.422	11.8528	-0.876087	88.8458	-0.0656693
15.6127	169.508	11.8525	-0.875649	88.8436	-0.0656364
15.621	169.59	11.8523	-0.875186	88.8416	-0.0656017
15.6293	169.676	11.852	-0.874707	88.8396	-0.0655658
15.6377	169.761	11.8517	-0.874234	88.8376	-0.0655304
15.646	169.841	11.8515	-0.873758	88.8355	-0.0654947
15.6543	169.922	11.8512	-0.873318	88.8333	-0.0654617
15.6627	170.008	11.8509	-0.872892	88.8311	-0.0654297
15.671	170.094	11.8505	-0.872436	88.8286	-0.0653956
15.6793	170.179	11.8503	-0.872014	88.8265	-0.065364
15.6877	170.261	11.85	-0.871564	88.8244	-0.0653302
15.696	170.345	11.8497	-0.871099	88.8225	-0.0652954
15.7043	170.43	11.8495	-0.870641	88.8205	-0.065261
15.7127	170.51	11.8492	-0.870204	88.8187	-0.0652283
15.721	170.594	11.8489	-0.869817	88.8165	-0.0651993
15.7293	170.678	11.8487	-0.869394	88.8145	-0.0651676
15.7377	170.758	11.8484	-0.86894	88.8126	-0.0651335
15.746	170.844	11.8481	-0.868487	88.8106	-0.0650996
15.7543	170.932	11.8479	-0.868077	88.8086	-0.0650688
15.7627	171.011	11.8476	-0.867656	88.8065	-0.0650373
15.771	171.098	11.8473	-0.867236	88.8045	-0.0650058
15.7793	171.178	11.847	-0.866839	88.8021	-0.064976
15.7877	171.265	11.8467	-0.866436	88.7998	-0.0649459
15.796	171.353	11.8464	-0.866034	88.7977	-0.0649157
15.8043	171.433	11.8461	-0.865614	88.7957	-0.0648842
15.8127	171.52	11.8458	-0.865229	88.7934	-0.0648553
15.821	171.607	11.8456	-0.864854	88.7913	-0.0648273
15.8293	171.691	11.8453	-0.864474	88.7892	-0.0647988
15.8377	171.772	11.845	-0.864087	88.7873	-0.0647698
15.846	171.853	11.8447	-0.863669	88.7851	-0.0647384
15.8543	171.939	11.8444	-0.863258	88.7829	-0.0647077
15.8627	172.02	11.8442	-0.862846	88.781	-0.0646767
15.871	172.108	11.8439	-0.862451	88.7792	-0.0646471
15.8793	172.195	11.8437	-0.862061	88.7772	-0.0646179
15.8877	172.277	11.8434	-0.861631	88.7752	-0.0645856
15.896	172.356	11.8432	-0.861174	88.7733	-0.0645514
15.9043	172.441	11.8429	-0.860738	88.7712	-0.0645188
15.9127	172.523	11.8426	-0.860345	88.769	-0.0644893
15.921	172.609	11.8423	-0.859916	88.7669	-0.0644571
15.9293	172.691	11.842	-0.859506	88.7649	-0.0644264
15.9377	172.78	11.8418	-0.859087	88.7631	-0.064395
15.946	172.859	11.8415	-0.858677	88.7609	-0.0643643
15.9543	172.942	11.8412	-0.858272	88.7588	-0.0643339
15.9627	173.028	11.841	-0.85787	88.7568	-0.0643037
15.971	173.11	11.8407	-0.857487	88.7548	-0.0642751
15.9793	173.193	11.8404	-0.857095	88.7527	-0.0642456
15.9877	173.28	11.8401	-0.856691	88.7508	-0.0642154
15.996	173.363	11.8399	-0.856271	88.749	-0.0641839
16.0043	173.444	11.8397	-0.85586	88.7471	-0.0641531
16.0127	173.524	11.8394	-0.855464	88.7451	-0.0641234
16.021	173.611	11.8391	-0.855072	88.743	-0.064094
16.0293	173.695	11.8389	-0.854682	88.7413	-0.0640648
16.0377	173.782	11.8386	-0.854266	88.7395	-0.0640336
16.046	173.863	11.8384	-0.853856	88.7375	-0.0640029
16.0543	173.952	11.8381	-0.853453	88.7355	-0.0639727
16.0627	174.038	11.8379	-0.853081	88.7337	-0.0639448
16.071	174.119	11.8376	-0.852699	88.7318	-0.0639161
16.0793	174.197	11.8373	-0.852323	88.7297	-0.063888
16.0877	174.28	11.837	-0.851907	88.7274	-0.0638568
16.096	174.364	11.8368	-0.851486	88.7253	-0.0638252
16.1043	174.448	11.8365	-0.8511	88.7232	-0.0637963
16.1127	174.532	11.8362	-0.850681	88.721	-0.0637649
16.121	174.615	11.8359	-0.850285	88.7188	-0.0637352
16.1293	174.698	11.8356	-0.849912	88.7165	-0.0637073
16.1377	174.783	11.8353	-0.849532	88.7142	-0.0636787
16.146	174.872	11.835	-0.849133	88.7119	-0.0636489
16.1543	174.96	11.8347	-0.848743	88.7096	-0.0636197
16.1627	175.039	11.8344	-0.848343	88.7076	-0.0635896
16.171	175.118	11.8341	-0.847992	88.7056	-0.0635634
16.1793	175.207	11.8339	-0.847625	88.7038	-0.0635358
16.1877	175.286	11.8336	-0.847218	88.7017	-0.0635053
16.196	175.374	11.8334	-0.846838	88.6999	-0.0634768
16.2043	175.452	11.8331	-0.84643	88.6981	-0.0634462
16.2127	175.539	11.8329	-0.846007	88.6961	-0.0634146
16.221	175.625	11.8326	-0.845613	88.6943	-0.063385
16.2293	175.706	11.8324	-0.845212	88.6927	-0.063355
16.2377	175.795	11.8322	-0.844798	88.6909	-0.0633239
16.246	175.879	11.8319	-0.844376	88.689	-0.0632923
16.2543	175.96	11.8317	-0.843952	88.6871	-0.0632605
16.2627	176.044	11.8314	-0.843542	88.6852	-0.0632298
16.271	176.126	11.8311	-0.843158	88.6832	-0.063201
16.2793	176.209	11.8309	-0.842746	88.6812	-0.0631701
16.2877	176.297	11.8306	-0.842388	88.6792	-0.0631433
16.296	176.378	11.8303	-0.842009	88.6773	-0.0631148
16.3043	176.465	11.8301	-0.84159	88.6755	-0.0630834
16.3127	176.541	11.8299	-0.841207	88.6736	-0.0630548
16.321	176.628	11.8296	-0.840826	88.6718	-0.0630262
16.3293	176.713	11.8293	-0.840467	88.6698	-0.0629993
16.3377	176.791	11.8291	-0.840089	88.6679	-0.0629709
16.346	176.876	11.8288	-0.839708	88.666	-0.0629424
16.3543	176.96	11.8286	-0.839354	88.6641	-0.0629159
16.3627	177.042	11.8283	-0.839009	88.6622	-0.06289
16.371	177.127	11.8281	-0.838606	88.6601	-0.0628598
16.3793	177.209	11.8278	-0.838217	88.6581	-0.0628306
16.3877	177.298	11.8275	-0.837856	88.6561	-0.0628036
16.396	177.381	11.8272	-0.837457	88.654	-0.0627737
16.4043	177.464	11.827	-0.837088	88.6519	-0.062746
16.4127	177.545	11.8267	-0.836721	88.6499	-0.0627185
16.421	177.631	11.8264	-0.836344	88.6478	-0.0626902
16.4293	177.714	11.8262	-0.835969	88.6459	-0.0626621
16.4377	177.797	11.8259	-0.83556	88.6439	-0.0626315
16.446	177.879	11.8256	-0.835175	88.6418	-0.0626026
16.4543	177.966	11.8254	-0.834808	88.64	-0.0625751
16.4627	178.049	11.8251	-0.83448	88.6382	-0.0625505
16.471	178.136	11.8249	-0.834117	88.6363	-0.0625233
16.4793	178.217	11.8247	-0.833743	88.6346	-0.0624953
16.4877	178.304	11.8244	-0.833362	88.6327	-0.0624667
16.496	178.381	11.8242	-0.832976	88.631	-0.0624378
16.5043	178.473	11.8239	-0.832605	88.6293	-0.0624099
16.5127	178.554	11.8237	-0.832222	88.6274	-0.0623812
16.521	178.639	11.8234	-0.831835	88.6253	-0.0623523
16.5293	178.724	11.8232	-0.831446	88.6236	-0.0623231
16.5377	178.807	11.823	-0.831077	88.6218	-0.0622954
16.546	178.888	11.8227	-0.830675	88.6203	-0.0622653
16.5543	178.977	11.8225	-0.830284	88.6182	-0.062236
16.5627	179.054	11.8222	-0.829939	88.6164	-0.0622101
16.571	179.135	11.822	-0.829587	88.6146	-0.0621838
16.5793	179.22	11.8217	-0.829193	88.6128	-0.0621542
16.5877	179.305	11.8215	-0.828848	88.6108	-0.0621283
16.596	179.391	11.8212	-0.828474	88.609	-0.0621003
16.6043	179.473	11.821	-0.828106	88.6074	-0.0620727
16.6127	179.556	11.8208	-0.827751	88.6056	-0.0620461
16.621	179.641	11.8205	-0.827358	88.6037	-0.0620167
16.6293	179.726	11.8203	-0.826947	88.6017	-0.0619859
16.6377	179.807	11.82	-0.826579	88.5999	-0.0619583
16.646	179.888	11.8197	-0.826211	88.5978	-0.0619306
[truncated: 9,890 more rows]
