# Supplementary material for: Comparative study on mechanisms for improving mechanical properties and microstructure of cement paste modified by different types of nanomaterials
Source: publisher site journal article supplement (doi:10.1515/ntrev-2021-0027), 2021-01-01
Supplement: Supplementary file 7 [file NC-0.3-1d.xlsx]

## Sheet: Sheet1
Time (min)	Temperature (°C)	Weight (mg)			Temperature Difference (°C/mg)
0.000666667	22.0433	13.6159	-0.894154	100	-0.0656697
0.00433333	22.0882	13.6158	-0.888154	99.9991	-0.065229
0.0126667	22.1337	13.6156	-0.88797	99.9976	-0.0652155
0.021	22.1628	13.6154	-0.88762	99.9958	-0.0651898
0.0293333	22.2139	13.6151	-0.887137	99.9938	-0.0651543
0.0376667	22.2546	13.6148	-0.886544	99.9913	-0.0651108
0.046	22.3	13.6144	-0.885817	99.9885	-0.0650574
0.0543333	22.3403	13.614	-0.885006	99.9859	-0.0649978
0.0626667	22.3863	13.6137	-0.884042	99.9834	-0.064927
0.071	22.417	13.6133	-0.883004	99.9808	-0.0648508
0.0793333	22.4666	13.6129	-0.881878	99.9777	-0.0647681
0.0876667	22.5026	13.6125	-0.880664	99.9747	-0.0646789
0.096	22.5414	13.6121	-0.8795	99.9715	-0.0645934
0.104333	22.5804	13.6116	-0.878379	99.9683	-0.0645111
0.112667	22.6232	13.6112	-0.877332	99.965	-0.0644342
0.121	22.66	13.6108	-0.876287	99.962	-0.0643574
0.129333	22.7033	13.6104	-0.875271	99.9592	-0.0642828
0.137667	22.7393	13.61	-0.874311	99.9561	-0.0642123
0.146	22.7814	13.6095	-0.873423	99.9527	-0.0641471
0.154333	22.8148	13.609	-0.87251	99.9492	-0.0640801
0.162667	22.8624	13.6086	-0.871598	99.9458	-0.064013
0.171	22.8958	13.6081	-0.870726	99.9427	-0.063949
0.179333	22.9387	13.6077	-0.869893	99.9395	-0.0638878
0.187667	22.9765	13.6073	-0.8691	99.9362	-0.0638296
0.196	23.0179	13.6068	-0.868358	99.9328	-0.0637751
0.204333	23.0497	13.6063	-0.867662	99.9293	-0.063724
0.212667	23.0873	13.6058	-0.866977	99.9258	-0.0636737
0.221	23.1249	13.6053	-0.866272	99.9222	-0.0636219
0.229333	23.1704	13.6049	-0.865582	99.9188	-0.0635713
0.237667	23.2079	13.6044	-0.864912	99.9153	-0.0635221
0.246	23.2426	13.604	-0.864333	99.912	-0.0634795
0.254333	23.2742	13.6035	-0.863768	99.9083	-0.063438
0.262667	23.3141	13.603	-0.863231	99.9048	-0.0633986
0.271	23.3459	13.6025	-0.862732	99.9011	-0.0633619
0.279333	23.3879	13.602	-0.862193	99.8975	-0.0633223
0.287667	23.424	13.6015	-0.861712	99.8938	-0.063287
0.296	23.4578	13.601	-0.861266	99.8901	-0.0632542
0.304333	23.4948	13.6005	-0.860827	99.8865	-0.063222
0.312667	23.5329	13.6	-0.860428	99.8829	-0.0631927
0.321	23.5614	13.5995	-0.860086	99.8791	-0.0631676
0.329333	23.6071	13.5989	-0.859737	99.8749	-0.063142
0.337667	23.6356	13.5984	-0.859416	99.871	-0.0631184
0.346	23.6717	13.5978	-0.859127	99.8671	-0.0630971
0.354333	23.7083	13.5973	-0.858882	99.8629	-0.0630792
0.362667	23.7447	13.5968	-0.858658	99.8591	-0.0630627
0.371	23.7783	13.5962	-0.858456	99.8552	-0.0630479
0.379333	23.8144	13.5956	-0.858316	99.851	-0.0630376
0.387667	23.8414	13.5951	-0.858196	99.8468	-0.0630288
0.396	23.8768	13.5945	-0.858099	99.8424	-0.0630217
0.404333	23.9157	13.5939	-0.858013	99.8381	-0.0630153
0.412667	23.952	13.5933	-0.857927	99.8341	-0.063009
0.421	23.9781	13.5928	-0.857885	99.8301	-0.0630059
0.429333	24.0182	13.5922	-0.857842	99.8259	-0.0630028
0.437667	24.0514	13.5917	-0.857788	99.8221	-0.0629988
0.446	24.0842	13.5912	-0.857785	99.8181	-0.0629986
0.454333	24.1155	13.5906	-0.857761	99.8138	-0.0629968
0.462667	24.1532	13.59	-0.857734	99.8095	-0.0629949
0.471	24.1881	13.5894	-0.857767	99.8054	-0.0629973
0.479333	24.2219	13.5889	-0.8578	99.8016	-0.0629997
0.487667	24.2503	13.5884	-0.857868	99.7976	-0.0630047
0.496	24.2915	13.5878	-0.857961	99.7936	-0.0630115
0.504333	24.3292	13.5873	-0.858071	99.7894	-0.0630196
0.512667	24.3609	13.5867	-0.858219	99.7853	-0.0630305
0.521	24.3904	13.5861	-0.858421	99.7808	-0.0630453
0.529333	24.4294	13.5855	-0.858628	99.7766	-0.0630605
0.537667	24.4677	13.585	-0.85884	99.7726	-0.0630761
0.546	24.5026	13.5844	-0.859067	99.7685	-0.0630928
0.554333	24.5342	13.5838	-0.859301	99.7642	-0.0631099
0.562667	24.5673	13.5832	-0.859561	99.7599	-0.063129
0.571	24.6044	13.5827	-0.859802	99.7557	-0.0631467
0.579333	24.6489	13.5821	-0.860054	99.7512	-0.0631652
0.587667	24.6787	13.5815	-0.860313	99.7468	-0.0631842
0.596	24.7143	13.5809	-0.860582	99.7424	-0.063204
0.604333	24.7485	13.5803	-0.860851	99.7381	-0.0632238
0.612667	24.7877	13.5797	-0.861126	99.7337	-0.063244
0.621	24.8181	13.5791	-0.861417	99.7291	-0.0632653
0.629333	24.8549	13.5785	-0.861757	99.7249	-0.0632903
0.637667	24.894	13.5779	-0.862107	99.7205	-0.063316
0.646	24.9262	13.5773	-0.862473	99.7162	-0.0633429
0.654333	24.9677	13.5767	-0.86287	99.7118	-0.063372
0.662667	25.0068	13.5761	-0.863267	99.7074	-0.0634012
0.671	25.0373	13.5755	-0.863693	99.7031	-0.0634325
0.679333	25.085	13.5749	-0.864135	99.6986	-0.063465
0.687667	25.1176	13.5743	-0.864587	99.694	-0.0634981
0.696	25.1598	13.5737	-0.865041	99.6896	-0.0635315
0.704333	25.1977	13.5731	-0.865548	99.6851	-0.0635687
0.712667	25.2364	13.5725	-0.866006	99.6807	-0.0636024
0.721	25.2715	13.5719	-0.866493	99.6763	-0.0636381
0.729333	25.3139	13.5712	-0.866992	99.6717	-0.0636748
0.737667	25.3531	13.5706	-0.867534	99.6672	-0.0637146
0.746	25.3878	13.57	-0.868074	99.6625	-0.0637542
0.754333	25.4341	13.5693	-0.868621	99.6577	-0.0637944
0.762667	25.4702	13.5687	-0.869126	99.6533	-0.0638315
0.771	25.5107	13.5681	-0.869655	99.6488	-0.0638704
0.779333	25.5505	13.5675	-0.870251	99.6442	-0.0639141
0.787667	25.5942	13.5669	-0.870788	99.6398	-0.0639536
0.796	25.6313	13.5663	-0.871399	99.6351	-0.0639985
0.804333	25.6841	13.5656	-0.872008	99.6304	-0.0640432
0.812667	25.7245	13.565	-0.872616	99.6257	-0.0640879
0.821	25.7663	13.5643	-0.873195	99.6208	-0.0641304
0.829333	25.8024	13.5637	-0.873809	99.6163	-0.0641754
0.837667	25.8434	13.5631	-0.874478	99.6119	-0.0642245
0.846	25.8935	13.5624	-0.875172	99.6069	-0.0642756
0.854333	25.9414	13.5618	-0.875869	99.6022	-0.0643267
0.862667	25.9868	13.5611	-0.87653	99.5973	-0.0643753
0.871	26.0364	13.5604	-0.877235	99.5924	-0.064427
0.879333	26.0741	13.5598	-0.87795	99.5875	-0.0644795
0.887667	26.122	13.5591	-0.87866	99.5828	-0.0645317
0.896	26.1698	13.5585	-0.879368	99.5784	-0.0645837
0.904333	26.2126	13.5579	-0.880088	99.5739	-0.0646366
0.912667	26.2573	13.5573	-0.880823	99.5694	-0.0646906
0.921	26.2999	13.5567	-0.881549	99.5648	-0.0647439
0.929333	26.3528	13.5561	-0.882297	99.5603	-0.0647989
0.937667	26.4007	13.5555	-0.883064	99.5559	-0.0648552
0.946	26.4486	13.5548	-0.883841	99.5513	-0.0649122
0.954333	26.4935	13.5542	-0.884629	99.5464	-0.0649701
0.962667	26.5463	13.5535	-0.885419	99.5416	-0.0650282
0.971	26.5981	13.5528	-0.886223	99.5365	-0.0650872
0.979333	26.6497	13.5522	-0.887079	99.5317	-0.06515
0.987667	26.6927	13.5515	-0.887931	99.5266	-0.0652126
0.996	26.7481	13.5508	-0.888796	99.5216	-0.0652761
1.00433	26.8026	13.5501	-0.889648	99.5166	-0.0653387
1.01267	26.853	13.5494	-0.890484	99.5116	-0.0654001
1.021	26.9074	13.5487	-0.891332	99.5065	-0.0654624
1.02933	26.9571	13.5481	-0.892186	99.5016	-0.0655251
1.03767	27.0034	13.5474	-0.893082	99.4968	-0.0655909
1.046	27.0618	13.5468	-0.893942	99.4921	-0.0656541
1.05433	27.1119	13.5461	-0.894775	99.4873	-0.0657153
1.06267	27.1672	13.5455	-0.895633	99.4823	-0.0657783
1.071	27.2221	13.5448	-0.896551	99.4775	-0.0658457
1.07933	27.2832	13.5441	-0.897482	99.4726	-0.0659141
1.08767	27.33	13.5435	-0.8984	99.4678	-0.0659815
1.096	27.3821	13.5428	-0.899341	99.463	-0.0660506
1.10433	27.4401	13.5422	-0.900235	99.4581	-0.0661163
1.11267	27.4925	13.5415	-0.90118	99.4531	-0.0661857
1.121	27.5522	13.5408	-0.902163	99.448	-0.0662578
1.12933	27.6142	13.5401	-0.90313	99.4429	-0.0663289
1.13767	27.6629	13.5394	-0.904112	99.4378	-0.066401
1.146	27.7228	13.5387	-0.905101	99.4327	-0.0664736
1.15433	27.7798	13.538	-0.906087	99.4277	-0.0665461
1.16267	27.8405	13.5373	-0.907069	99.4226	-0.0666182
1.171	27.901	13.5366	-0.908048	99.4174	-0.0666901
1.17933	27.9576	13.5359	-0.909006	99.4122	-0.0667604
1.18767	28.0178	13.5352	-0.910066	99.407	-0.0668383
1.196	28.0767	13.5345	-0.911132	99.4021	-0.0669166
1.20433	28.135	13.5338	-0.91217	99.397	-0.0669928
1.21267	28.2032	13.5332	-0.913215	99.3922	-0.0670696
1.221	28.2591	13.5325	-0.914304	99.3873	-0.0671495
1.22933	28.3239	13.5319	-0.915344	99.3824	-0.0672259
1.23767	28.3865	13.5312	-0.916425	99.3773	-0.0673053
1.246	28.45	13.5305	-0.917504	99.3722	-0.0673846
1.25433	28.5064	13.5298	-0.918613	99.3672	-0.067466
1.26267	28.576	13.5291	-0.919785	99.3621	-0.0675521
1.271	28.6339	13.5284	-0.920897	99.357	-0.0676337
1.27933	28.6986	13.5277	-0.921971	99.3516	-0.0677126
1.28767	28.7658	13.527	-0.923035	99.3466	-0.0677908
1.296	28.8267	13.5263	-0.924157	99.3414	-0.0678732
1.30433	28.8937	13.5255	-0.925262	99.3361	-0.0679543
1.31267	28.9628	13.5248	-0.926395	99.3306	-0.0680375
1.321	29.033	13.5241	-0.92749	99.3252	-0.068118
1.32933	29.0999	13.5233	-0.928611	99.3199	-0.0682003
1.33767	29.1619	13.5226	-0.929744	99.3146	-0.0682835
1.346	29.227	13.5219	-0.930864	99.3091	-0.0683658
1.35433	29.2915	13.5211	-0.932004	99.3037	-0.0684495
1.36267	29.3644	13.5204	-0.933164	99.2981	-0.0685347
1.371	29.426	13.5196	-0.934347	99.2925	-0.0686216
1.37933	29.4992	13.5189	-0.935499	99.287	-0.0687062
1.38767	29.5586	13.5181	-0.93669	99.2816	-0.0687937
1.396	29.6419	13.5174	-0.937924	99.2761	-0.0688842
1.40433	29.7026	13.5166	-0.93916	99.2707	-0.068975
1.41267	29.7768	13.5159	-0.940397	99.2652	-0.0690659
1.421	29.8469	13.5151	-0.941668	99.2597	-0.0691593
1.42933	29.9164	13.5144	-0.94296	99.254	-0.0692541
1.43767	29.9838	13.5136	-0.944263	99.2485	-0.0693498
1.446	30.0555	13.5129	-0.945539	99.2429	-0.0694435
1.45433	30.1289	13.5121	-0.946808	99.2374	-0.0695367
1.46267	30.2057	13.5113	-0.948123	99.2317	-0.0696333
1.471	30.2783	13.5105	-0.949432	99.2259	-0.0697294
1.47933	30.3506	13.5098	-0.950692	99.2204	-0.069822
1.48767	30.4227	13.509	-0.951987	99.2149	-0.0699171
1.496	30.4978	13.5083	-0.953303	99.2094	-0.0700137
1.50433	30.5679	13.5075	-0.954624	99.2037	-0.0701108
1.51267	30.6473	13.5068	-0.955942	99.1981	-0.0702076
1.521	30.7162	13.506	-0.957234	99.1926	-0.0703025
1.52933	30.7888	13.5053	-0.958541	99.1871	-0.0703985
1.53767	30.8625	13.5045	-0.959864	99.1815	-0.0704956
1.546	30.9444	13.5037	-0.96121	99.1755	-0.0705945
1.55433	31.0168	13.5029	-0.962556	99.1698	-0.0706933
1.56267	31.1012	13.5021	-0.963938	99.1638	-0.0707948
1.571	31.1716	13.5013	-0.965297	99.1579	-0.0708946
1.57933	31.2521	13.5005	-0.966657	99.152	-0.0709945
1.58767	31.3257	13.4997	-0.968035	99.1462	-0.0710957
1.596	31.4037	13.4989	-0.969441	99.1403	-0.0711989
1.60433	31.48	13.4981	-0.970868	99.1344	-0.0713038
1.61267	31.5638	13.4973	-0.972281	99.1285	-0.0714076
1.621	31.6343	13.4965	-0.973719	99.1226	-0.0715132
1.62933	31.7197	13.4957	-0.975138	99.1169	-0.0716174
1.63767	31.7876	13.4949	-0.976567	99.1112	-0.0717223
1.646	31.8634	13.4941	-0.978039	99.1053	-0.0718304
1.65433	31.9468	13.4933	-0.979487	99.0994	-0.0719368
1.66267	32.0284	13.4925	-0.98094	99.0933	-0.0720435
1.671	32.1062	13.4916	-0.982384	99.0871	-0.0721495
1.67933	32.1847	13.4908	-0.983782	99.0812	-0.0722522
1.68767	32.2701	13.49	-0.985241	99.0751	-0.0723594
1.696	32.3492	13.4892	-0.986734	99.069	-0.0724691
1.70433	32.4245	13.4883	-0.988258	99.0628	-0.0725809
1.71267	32.5132	13.4875	-0.989782	99.0566	-0.0726929
1.721	32.589	13.4866	-0.991299	99.0503	-0.0728043
1.72933	32.6707	13.4858	-0.992807	99.0442	-0.072915
1.73767	32.7505	13.4849	-0.994373	99.0379	-0.0730301
1.746	32.8366	13.4841	-0.995953	99.0316	-0.0731461
1.75433	32.9179	13.4832	-0.997505	99.0252	-0.0732601
1.76267	32.9987	13.4823	-0.999122	99.0187	-0.0733788
1.771	33.0794	13.4814	-1.00063	99.0122	-0.0734895
1.77933	33.1674	13.4805	-1.00218	99.0057	-0.0736031
1.78767	33.2456	13.4797	-1.00373	98.9993	-0.073717
1.796	33.3263	13.4788	-1.00534	98.9929	-0.0738358
1.80433	33.4089	13.4779	-1.00694	98.9866	-0.0739531
1.81267	33.494	13.477	-1.00852	98.9799	-0.0740688
1.821	33.5793	13.4762	-1.01011	98.9734	-0.0741859
1.82933	33.6653	13.4753	-1.01173	98.967	-0.0743048
1.83767	33.7409	13.4744	-1.0134	98.9608	-0.0744278
1.846	33.8242	13.4736	-1.01505	98.9545	-0.0745485
1.85433	33.9062	13.4727	-1.01676	98.9482	-0.0746743
1.86267	33.998	13.4719	-1.01847	98.942	-0.0747998
1.871	34.0739	13.471	-1.02014	98.9355	-0.0749226
1.87933	34.1681	13.4701	-1.02175	98.929	-0.0750405
1.88767	34.2481	13.4692	-1.02343	98.9224	-0.0751639
1.896	34.3356	13.4683	-1.02511	98.916	-0.0752873
1.90433	34.4215	13.4674	-1.02678	98.9094	-0.0754099
1.91267	34.5035	13.4665	-1.02846	98.9028	-0.0755333
1.921	34.5876	13.4656	-1.03012	98.8959	-0.0756557
1.92933	34.675	13.4647	-1.03182	98.8889	-0.0757805
1.93767	34.7608	13.4637	-1.03353	98.882	-0.0759059
1.946	34.8469	13.4628	-1.03526	98.8751	-0.0760332
1.95433	34.9267	13.4618	-1.037	98.8682	-0.0761605
1.96267	35.0155	13.4609	-1.03873	98.8613	-0.076288
1.971	35.1039	13.46	-1.04046	98.8546	-0.076415
1.97933	35.1955	13.459	-1.04221	98.8477	-0.0765432
1.98767	35.2818	13.4581	-1.04398	98.8407	-0.0766732
1.996	35.3682	13.4571	-1.04573	98.8336	-0.076802
2.00433	35.45	13.4562	-1.04741	98.8267	-0.0769256
2.01267	35.5327	13.4553	-1.04912	98.8199	-0.0770508
2.021	35.6171	13.4543	-1.0509	98.813	-0.0771818
2.02933	35.7084	13.4534	-1.05266	98.806	-0.0773109
2.03767	35.7922	13.4524	-1.05444	98.7992	-0.0774412
2.046	35.8849	13.4515	-1.05625	98.7924	-0.0775749
2.05433	35.9683	13.4506	-1.05804	98.7854	-0.0777061
2.06267	36.0555	13.4496	-1.05985	98.7786	-0.0778393
2.071	36.1389	13.4487	-1.06168	98.7717	-0.0779733
2.07933	36.2318	13.4478	-1.06343	98.7648	-0.078102
2.08767	36.3177	13.4468	-1.06531	98.7579	-0.0782397
2.096	36.4065	13.4459	-1.0672	98.7509	-0.0783787
2.10433	36.4949	13.4449	-1.06896	98.744	-0.0785081
2.11267	36.5849	13.444	-1.07077	98.737	-0.0786406
2.121	36.6715	13.443	-1.07258	98.7297	-0.0787738
2.12933	36.7588	13.442	-1.0744	98.7225	-0.0789074
2.13767	36.8441	13.441	-1.07628	98.7151	-0.0790455
2.146	36.9343	13.44	-1.07812	98.7077	-0.0791809
2.15433	37.023	13.439	-1.07993	98.7003	-0.079314
2.16267	37.1123	13.438	-1.0818	98.6931	-0.0794511
2.171	37.1932	13.437	-1.08365	98.6857	-0.0795869
2.17933	37.2849	13.4359	-1.08543	98.678	-0.079718
2.18767	37.3704	13.4349	-1.08732	98.6705	-0.0798566
2.196	37.4619	13.4339	-1.08915	98.663	-0.079991
2.20433	37.5487	13.4329	-1.09102	98.6556	-0.0801279
2.21267	37.6372	13.4319	-1.09287	98.6482	-0.0802638
2.221	37.7201	13.4309	-1.09467	98.6408	-0.0803964
2.22933	37.8126	13.4299	-1.09651	98.6336	-0.0805313
2.23767	37.8978	13.4289	-1.09836	98.6263	-0.0806674
2.246	37.9876	13.4279	-1.10023	98.619	-0.0808042
2.25433	38.0772	13.4269	-1.10206	98.6117	-0.0809388
2.26267	38.1683	13.4259	-1.10391	98.6046	-0.0810748
2.271	38.2492	13.425	-1.10574	98.5973	-0.0812092
2.27933	38.3436	13.4239	-1.10757	98.5899	-0.0813439
2.28767	38.4258	13.4229	-1.10939	98.5822	-0.0814775
2.296	38.5173	13.4219	-1.11125	98.5748	-0.0816139
2.30433	38.6045	13.4208	-1.11315	98.5671	-0.0817532
2.31267	38.6988	13.4198	-1.11501	98.5593	-0.0818897
2.321	38.7843	13.4187	-1.11686	98.5516	-0.0820259
2.32933	38.8756	13.4177	-1.11869	98.5439	-0.08216
2.33767	38.9599	13.4166	-1.12052	98.5361	-0.0822947
2.346	39.0507	13.4156	-1.12238	98.5286	-0.0824313
2.35433	39.1403	13.4145	-1.12424	98.5209	-0.0825681
2.36267	39.233	13.4135	-1.12612	98.5131	-0.0827057
2.371	39.3169	13.4125	-1.12797	98.5056	-0.082842
2.37933	39.4076	13.4114	-1.12981	98.4976	-0.0829769
2.38767	39.494	13.4103	-1.13163	98.4899	-0.0831104
2.396	39.5847	13.4093	-1.13346	98.4826	-0.0832447
2.40433	39.6703	13.4083	-1.13529	98.4749	-0.0833793
2.41267	39.7621	13.4072	-1.13715	98.4673	-0.0835164
2.421	39.8408	13.4062	-1.13901	98.4596	-0.0836528
2.42933	39.9334	13.4051	-1.14087	98.4517	-0.0837891
2.43767	40.0257	13.4041	-1.14271	98.444	-0.0839242
2.446	40.1142	13.403	-1.14455	98.4363	-0.0840596
2.45433	40.2072	13.402	-1.14635	98.4288	-0.0841918
2.46267	40.2905	13.401	-1.14815	98.4216	-0.0843241
2.471	40.3811	13.4	-1.14999	98.4139	-0.0844593
2.47933	40.4749	13.3989	-1.15182	98.4061	-0.0845935
2.48767	40.5576	13.3979	-1.15361	98.3983	-0.084725
2.496	40.6457	13.3968	-1.15539	98.3906	-0.084856
2.50433	40.7289	13.3957	-1.15719	98.3828	-0.0849881
2.51267	40.8181	13.3947	-1.15898	98.375	-0.0851196
2.521	40.9087	13.3936	-1.16073	98.3673	-0.0852477
2.52933	40.9979	13.3926	-1.1625	98.3594	-0.0853782
2.53767	41.0845	13.3915	-1.1643	98.3516	-0.08551
2.546	41.1773	13.3904	-1.16604	98.3438	-0.0856379
2.55433	41.2565	13.3894	-1.16775	98.3359	-0.0857634
2.56267	41.3462	13.3883	-1.16947	98.3281	-0.0858895
2.571	41.4412	13.3872	-1.17118	98.3204	-0.0860154
2.57933	41.5252	13.3862	-1.17288	98.3126	-0.0861404
2.58767	41.6049	13.3851	-1.1746	98.3049	-0.0862662
2.596	41.6967	13.3841	-1.17627	98.2973	-0.0863894
2.60433	41.7842	13.3831	-1.17799	98.2896	-0.0865152
2.61267	41.8812	13.382	-1.17965	98.2818	-0.0866377
2.621	41.965	13.3809	-1.18128	98.2741	-0.0867572
2.62933	42.0565	13.3799	-1.18297	98.2663	-0.0868809
2.63767	42.1437	13.3788	-1.1846	98.2587	-0.0870009
2.646	42.2269	13.3778	-1.18622	98.251	-0.0871202
2.65433	42.3188	13.3767	-1.18785	98.2433	-0.0872399
2.66267	42.4053	13.3757	-1.18946	98.2356	-0.087358
2.671	42.4926	13.3746	-1.19102	98.2276	-0.0874722
2.67933	42.5773	13.3736	-1.19258	98.2199	-0.0875868
2.68767	42.6652	13.3725	-1.1941	98.2121	-0.0876985
2.696	42.7568	13.3715	-1.19563	98.2045	-0.0878113
2.70433	42.8441	13.3704	-1.19721	98.1967	-0.0879275
2.71267	42.9233	13.3693	-1.19875	98.1889	-0.0880405
2.721	43.0125	13.3683	-1.20023	98.181	-0.088149
2.72933	43.1057	13.3672	-1.20171	98.1732	-0.0882576
2.73767	43.1915	13.3662	-1.20318	98.1658	-0.0883658
2.746	43.2755	13.3651	-1.20464	98.1581	-0.0884725
2.75433	43.3619	13.3642	-1.20607	98.1508	-0.0885779
2.76267	43.4514	13.3631	-1.20746	98.1432	-0.0886802
2.771	43.541	13.3621	-1.20887	98.1356	-0.0887834
2.77933	43.6237	13.361	-1.21026	98.1279	-0.0888855
2.78767	43.7113	13.36	-1.21161	98.1203	-0.0889844
2.796	43.7997	13.359	-1.21293	98.1128	-0.0890815
2.80433	43.8861	13.358	-1.21429	98.1055	-0.0891815
2.81267	43.9716	13.357	-1.21562	98.098	-0.0892791
2.821	44.0622	13.3559	-1.21691	98.0905	-0.0893743
2.82933	44.1441	13.3549	-1.21824	98.0829	-0.0894716
2.83767	44.2354	13.3538	-1.21953	98.0751	-0.0895661
2.846	44.3222	13.3528	-1.22084	98.0676	-0.0896627
2.85433	44.4086	13.3518	-1.2221	98.0602	-0.0897548
2.86267	44.4892	13.3508	-1.22332	98.0527	-0.0898449
2.871	44.5746	13.3497	-1.22453	98.0449	-0.0899339
2.87933	44.6623	13.3487	-1.2257	98.0374	-0.0900193
2.88767	44.7474	13.3477	-1.22688	98.0299	-0.0901063
2.896	44.8363	13.3467	-1.22805	98.0224	-0.0901919
2.90433	44.9219	13.3456	-1.22922	98.0148	-0.090278
2.91267	45.0081	13.3446	-1.23032	98.0074	-0.0903589
2.921	45.0921	13.3436	-1.2314	98.0001	-0.090438
2.92933	45.1744	13.3426	-1.23248	97.9926	-0.0905174
2.93767	45.2664	13.3416	-1.23355	97.985	-0.0905963
2.946	45.3502	13.3406	-1.23464	97.9775	-0.0906758
2.95433	45.4325	13.3396	-1.23569	97.9702	-0.0907532
2.96267	45.5236	13.3386	-1.23676	97.963	-0.0908316
2.971	45.6062	13.3376	-1.23777	97.9554	-0.0909062
2.97933	45.696	13.3365	-1.23876	97.948	-0.090979
2.98767	45.7786	13.3356	-1.2397	97.9409	-0.0910478
2.996	45.862	13.3346	-1.24063	97.9335	-0.0911159
3.00433	45.9483	13.3336	-1.24158	97.9263	-0.0911855
3.01267	46.0343	13.3326	-1.24246	97.919	-0.0912501
3.021	46.1176	13.3316	-1.24334	97.9119	-0.0913154
3.02933	46.1973	13.3307	-1.24421	97.9047	-0.0913787
3.03767	46.2908	13.3297	-1.24507	97.8977	-0.0914419
3.046	46.3756	13.3287	-1.24588	97.8905	-0.0915017
3.05433	46.4594	13.3277	-1.24663	97.8834	-0.0915567
3.06267	46.5363	13.3268	-1.24736	97.8762	-0.09161
3.071	46.623	13.3258	-1.24812	97.869	-0.0916657
3.07933	46.7139	13.3248	-1.24887	97.8618	-0.0917211
3.08767	46.7958	13.3238	-1.24961	97.8545	-0.0917752
3.096	46.8781	13.3228	-1.25033	97.8473	-0.0918285
3.10433	46.9644	13.3218	-1.25104	97.84	-0.0918804
3.11267	47.0479	13.3209	-1.25173	97.8329	-0.091931
3.121	47.1321	13.3199	-1.25236	97.8256	-0.0919779
3.12933	47.2153	13.3189	-1.25302	97.8184	-0.0920262
3.13767	47.3	13.3179	-1.25372	97.8113	-0.0920774
3.146	47.3811	13.317	-1.2544	97.8044	-0.092127
3.15433	47.467	13.316	-1.255	97.7972	-0.0921713
3.16267	47.5489	13.3151	-1.25556	97.7903	-0.0922124
3.171	47.6357	13.3141	-1.25612	97.7835	-0.0922535
3.17933	47.714	13.3132	-1.25664	97.7766	-0.0922917
3.18767	47.8101	13.3123	-1.25712	97.7697	-0.0923274
3.196	47.8853	13.3113	-1.25755	97.7627	-0.092359
3.20433	47.9734	13.3104	-1.25803	97.7559	-0.0923937
3.21267	48.0504	13.3095	-1.25848	97.7492	-0.0924272
3.221	48.1378	13.3086	-1.25891	97.7426	-0.0924586
3.22933	48.2223	13.3076	-1.25933	97.7356	-0.0924897
3.23767	48.3032	13.3067	-1.25974	97.7286	-0.0925194
3.246	48.3856	13.3057	-1.26016	97.7218	-0.0925503
3.25433	48.4702	13.3048	-1.26055	97.715	-0.0925787
3.26267	48.553	13.3039	-1.26092	97.7081	-0.0926065
3.271	48.6372	13.3029	-1.26131	97.7011	-0.092635
3.27933	48.7226	13.302	-1.26171	97.6942	-0.0926642
3.28767	48.8024	13.3011	-1.26201	97.6876	-0.0926861
3.296	48.8881	13.3002	-1.26231	97.6808	-0.0927081
3.30433	48.9643	13.2992	-1.26258	97.674	-0.0927284
3.31267	49.0489	13.2983	-1.26286	97.6674	-0.0927486
3.321	49.1399	13.2974	-1.26315	97.6606	-0.09277
3.32933	49.211	13.2965	-1.26343	97.6537	-0.0927905
3.33767	49.2976	13.2955	-1.26367	97.6469	-0.0928083
3.346	49.3822	13.2947	-1.26392	97.6405	-0.0928269
3.35433	49.4673	13.2938	-1.26415	97.6341	-0.092843
3.36267	49.5435	13.2929	-1.26431	97.6276	-0.0928548
3.371	49.6355	13.292	-1.26452	97.621	-0.0928703
3.37933	49.7117	13.2911	-1.26466	97.6145	-0.0928806
3.38767	49.7967	13.2902	-1.26481	97.6077	-0.0928919
3.396	49.8719	13.2893	-1.26497	97.6012	-0.0929039
3.40433	49.9556	13.2885	-1.2651	97.5949	-0.0929131
3.41267	50.0395	13.2876	-1.26519	97.5884	-0.0929196
3.421	50.1233	13.2867	-1.26527	97.5819	-0.092926
3.42933	50.1991	13.2858	-1.26535	97.5753	-0.0929315
3.43767	50.2846	13.2849	-1.26541	97.5687	-0.0929359
3.446	50.368	13.284	-1.26549	97.5623	-0.0929415
3.45433	50.4482	13.2831	-1.26553	97.5557	-0.092945
3.46267	50.5352	13.2822	-1.26561	97.5493	-0.0929503
3.471	50.6107	13.2814	-1.26566	97.5431	-0.0929546
3.47933	50.6921	13.2805	-1.26568	97.5367	-0.0929555
3.48767	50.7782	13.2797	-1.26569	97.5302	-0.0929566
3.496	50.8569	13.2788	-1.26571	97.5241	-0.0929581
3.50433	50.9401	13.278	-1.26571	97.5179	-0.0929576
3.51267	51.0216	13.2771	-1.2657	97.5117	-0.0929569
3.521	51.0943	13.2763	-1.26566	97.5054	-0.092954
3.52933	51.1787	13.2754	-1.26561	97.4989	-0.0929508
3.53767	51.2589	13.2745	-1.26556	97.4927	-0.0929472
3.546	51.3478	13.2737	-1.2655	97.4864	-0.0929422
3.55433	51.4235	13.2728	-1.26543	97.48	-0.0929372
3.56267	51.5035	13.272	-1.2654	97.4737	-0.0929353
3.571	51.5892	13.2711	-1.26531	97.4674	-0.0929288
3.57933	51.6777	13.2702	-1.26523	97.4611	-0.0929229
3.58767	51.7549	13.2694	-1.26512	97.4547	-0.0929143
3.596	51.8354	13.2685	-1.26497	97.4483	-0.0929038
3.60433	51.9113	13.2676	-1.2649	97.442	-0.0928982
3.61267	51.9938	13.2668	-1.2648	97.4359	-0.0928911
3.621	52.0691	13.266	-1.26468	97.4296	-0.0928822
3.62933	52.1546	13.2651	-1.26458	97.4232	-0.092875
3.63767	52.2317	13.2643	-1.26444	97.4171	-0.0928644
3.646	52.3145	13.2634	-1.26425	97.4109	-0.0928506
3.65433	52.3963	13.2626	-1.26409	97.4047	-0.0928392
3.66267	52.4793	13.2617	-1.26389	97.3984	-0.0928244
3.671	52.5592	13.2608	-1.26378	97.392	-0.092816
3.67933	52.6459	13.26	-1.26365	97.386	-0.0928064
3.68767	52.7132	13.2592	-1.26344	97.3799	-0.0927915
3.696	52.8013	13.2584	-1.26322	97.374	-0.0927752
3.70433	52.877	13.2576	-1.26303	97.368	-0.0927615
3.71267	52.9635	13.2568	-1.26282	97.3621	-0.0927457
3.721	53.0431	13.2559	-1.2626	97.356	-0.0927295
3.72933	53.1225	13.2551	-1.26238	97.3499	-0.0927137
3.73767	53.2046	13.2543	-1.26217	97.3439	-0.0926983
3.746	53.2822	13.2535	-1.26199	97.3381	-0.0926849
3.75433	53.3603	13.2527	-1.26174	97.3324	-0.0926668
3.76267	53.4492	13.2519	-1.26152	97.3263	-0.0926501
3.771	53.5231	13.2511	-1.26128	97.3204	-0.0926325
3.77933	53.6101	13.2502	-1.26108	97.3143	-0.0926179
3.78767	53.6818	13.2494	-1.26084	97.3082	-0.0926001
3.796	53.7704	13.2486	-1.26062	97.3021	-0.0925839
3.80433	53.8452	13.2478	-1.26037	97.296	-0.0925661
3.81267	53.9252	13.247	-1.26011	97.2902	-0.0925464
3.821	54.0034	13.2462	-1.25982	97.2841	-0.0925254
3.82933	54.0918	13.2453	-1.25954	97.2781	-0.0925051
3.83767	54.1617	13.2445	-1.25928	97.272	-0.0924855
3.846	54.2482	13.2437	-1.25896	97.2661	-0.0924621
3.85433	54.325	13.2429	-1.25869	97.2602	-0.0924423
3.86267	54.4049	13.2421	-1.25838	97.2544	-0.0924194
3.871	54.491	13.2413	-1.25806	97.2485	-0.0923959
3.87933	54.5698	13.2405	-1.2577	97.2428	-0.0923697
3.88767	54.6466	13.2397	-1.25734	97.2369	-0.0923436
3.896	54.7332	13.2389	-1.25698	97.231	-0.0923167
3.90433	54.8037	13.2381	-1.25663	97.2251	-0.0922908
3.91267	54.8825	13.2373	-1.25628	97.2193	-0.0922655
3.921	54.9648	13.2365	-1.25595	97.2134	-0.0922409
3.92933	55.0492	13.2357	-1.25563	97.2076	-0.0922179
3.93767	55.1214	13.2349	-1.25528	97.2017	-0.092192
3.946	55.2044	13.2341	-1.25492	97.196	-0.0921654
3.95433	55.2837	13.2333	-1.25457	97.1901	-0.0921402
3.96267	55.3674	13.2325	-1.25424	97.1843	-0.0921157
3.971	55.4437	13.2318	-1.25391	97.1785	-0.0920915
3.97933	55.5249	13.231	-1.2536	97.1727	-0.0920683
3.98767	55.5995	13.2302	-1.25325	97.1669	-0.0920427
3.996	55.6841	13.2294	-1.25288	97.1614	-0.0920155
4.00433	55.7567	13.2287	-1.25246	97.1559	-0.0919846
4.01267	55.8403	13.2279	-1.25205	97.1503	-0.091955
4.021	55.9239	13.2272	-1.25166	97.1447	-0.0919259
4.02933	56.002	13.2264	-1.25127	97.1389	-0.0918971
4.03767	56.0762	13.2256	-1.25091	97.1334	-0.091871
4.046	56.1629	13.2248	-1.2505	97.1276	-0.0918412
4.05433	56.239	13.2241	-1.25011	97.1219	-0.0918121
4.06267	56.3176	13.2233	-1.24966	97.1164	-0.0917793
4.071	56.3992	13.2225	-1.24925	97.1107	-0.0917489
4.07933	56.479	13.2217	-1.24883	97.1048	-0.0917184
4.08767	56.5582	13.2209	-1.2484	97.0989	-0.0916868
4.096	56.6369	13.2202	-1.24795	97.0933	-0.0916535
4.10433	56.7134	13.2194	-1.2475	97.0876	-0.0916209
4.11267	56.7914	13.2186	-1.24705	97.0819	-0.0915872
4.121	56.8716	13.2178	-1.24658	97.0762	-0.0915528
4.12933	56.9544	13.2171	-1.24612	97.0707	-0.0915193
4.13767	57.033	13.2163	-1.24563	97.0652	-0.0914831
4.146	57.1152	13.2156	-1.24516	97.0595	-0.0914487
4.15433	57.1882	13.2148	-1.2447	97.054	-0.0914145
4.16267	57.2712	13.2141	-1.24422	97.0485	-0.0913798
4.171	57.349	13.2133	-1.24378	97.043	-0.0913475
4.17933	57.4321	13.2126	-1.24333	97.0375	-0.0913145
4.18767	57.5069	13.2118	-1.2429	97.032	-0.0912827
4.196	57.595	13.2111	-1.24248	97.0266	-0.0912522
4.20433	57.672	13.2104	-1.24201	97.0213	-0.0912172
4.21267	57.7527	13.2096	-1.24154	97.0157	-0.0911828
4.221	57.8247	13.2089	-1.24111	97.0103	-0.0911514
4.22933	57.9123	13.2081	-1.2407	97.0048	-0.0911213
4.23767	57.9876	13.2074	-1.24026	96.9993	-0.0910885
4.246	58.0694	13.2066	-1.23979	96.994	-0.091054
4.25433	58.1454	13.2059	-1.2393	96.9888	-0.0910181
4.26267	58.2244	13.2052	-1.23887	96.9834	-0.0909866
4.271	58.3	13.2045	-1.23841	96.978	-0.0909531
4.27933	58.387	13.2037	-1.23793	96.9724	-0.0909179
4.28767	58.4633	13.203	-1.23748	96.967	-0.0908848
4.296	58.5429	13.2023	-1.237	96.9618	-0.0908495
4.30433	58.6256	13.2015	-1.23653	96.9564	-0.0908151
4.31267	58.7096	13.2008	-1.23606	96.9509	-0.0907801
4.321	58.7869	13.2	-1.23562	96.9455	-0.090748
4.32933	58.8625	13.1993	-1.23521	96.9398	-0.0907176
4.33767	58.9462	13.1985	-1.23479	96.9342	-0.0906868
4.346	59.0249	13.1977	-1.23429	96.9286	-0.0906501
4.35433	59.0985	13.197	-1.23381	96.923	-0.0906152
4.36267	59.1802	13.1963	-1.23336	96.9177	-0.0905821
4.371	59.2583	13.1955	-1.23291	96.9121	-0.0905489
4.37933	59.3387	13.1947	-1.23252	96.9066	-0.0905201
4.38767	59.4218	13.194	-1.23206	96.9012	-0.0904864
4.396	59.4994	13.1933	-1.23163	96.896	-0.0904549
4.40433	59.5753	13.1926	-1.23117	96.8906	-0.0904213
4.41267	59.6618	13.1919	-1.2307	96.8854	-0.0903866
4.421	59.7383	13.1911	-1.23029	96.8801	-0.0903565
4.42933	59.8235	13.1904	-1.22993	96.8749	-0.0903302
4.43767	59.8954	13.1897	-1.2295	96.8696	-0.0902988
4.446	59.9793	13.189	-1.22912	96.8643	-0.0902704
4.45433	60.052	13.1883	-1.22874	96.859	-0.0902425
4.46267	60.1397	13.1875	-1.2283	96.8538	-0.0902102
4.471	60.2201	13.1868	-1.22794	96.8483	-0.0901841
4.47933	60.2965	13.1861	-1.2276	96.8428	-0.090159
4.48767	60.3759	13.1853	-1.22727	96.8374	-0.0901346
4.496	60.4571	13.1846	-1.22697	96.8318	-0.0901124
4.50433	60.5313	13.1838	-1.22663	96.8265	-0.0900879
4.51267	60.6117	13.1831	-1.2263	96.821	-0.0900639
4.521	60.6938	13.1823	-1.22604	96.8155	-0.0900444
4.52933	60.7728	13.1816	-1.22574	96.8098	-0.0900226
4.53767	60.8513	13.1808	-1.22546	96.8043	-0.0900022
4.546	60.935	13.1801	-1.2252	96.7988	-0.0899828
4.55433	61.0081	13.1793	-1.22496	96.7933	-0.0899654
4.56267	61.0866	13.1786	-1.22469	96.7877	-0.0899454
4.571	61.1705	13.1778	-1.22443	96.7823	-0.0899261
4.57933	61.2454	13.177	-1.22418	96.7766	-0.0899079
4.58767	61.3246	13.1763	-1.22397	96.7708	-0.0898927
4.596	61.4056	13.1755	-1.22375	96.7652	-0.0898763
4.60433	61.486	13.1747	-1.22352	96.7597	-0.0898592
4.61267	61.5589	13.174	-1.2233	96.7542	-0.0898431
4.621	61.6376	13.1732	-1.22313	96.7487	-0.0898307
4.62933	61.72	13.1725	-1.22299	96.743	-0.0898203
4.63767	61.8033	13.1717	-1.22284	96.7374	-0.0898094
4.646	61.884	13.1709	-1.22273	96.7318	-0.089801
4.65433	61.9639	13.1702	-1.22264	96.726	-0.0897948
4.66267	62.0441	13.1694	-1.22254	96.7205	-0.0897877
4.671	62.1217	13.1686	-1.22243	96.715	-0.089779
4.67933	62.1996	13.1679	-1.22235	96.7094	-0.0897734
4.68767	62.277	13.1671	-1.22232	96.7038	-0.0897711
4.696	62.3629	13.1663	-1.22226	96.6981	-0.0897668
4.70433	62.4416	13.1656	-1.22218	96.6923	-0.0897608
4.71267	62.5251	13.1648	-1.22214	96.6867	-0.0897582
4.721	62.6001	13.164	-1.2221	96.6809	-0.0897549
4.72933	62.6838	13.1632	-1.22204	96.6752	-0.0897505
4.73767	62.762	13.1625	-1.22206	96.6696	-0.0897519
4.746	62.8394	13.1617	-1.22205	96.6638	-0.0897515
4.75433	62.9186	13.1609	-1.22214	96.658	-0.0897579
4.76267	62.9995	13.1601	-1.22222	96.6522	-0.0897636
4.771	63.0778	13.1593	-1.22228	96.6464	-0.0897686
4.77933	63.154	13.1585	-1.22243	96.6403	-0.0897796
4.78767	63.2343	13.1577	-1.22256	96.6342	-0.0897886
4.796	63.3162	13.1568	-1.2227	96.6282	-0.0897994
4.80433	63.3969	13.156	-1.22289	96.6222	-0.089813
4.81267	63.4792	13.1552	-1.22311	96.6161	-0.0898293
4.821	63.5561	13.1544	-1.22323	96.6101	-0.0898381
4.82933	63.6413	13.1536	-1.22343	96.6041	-0.0898528
4.83767	63.718	13.1528	-1.22361	96.5983	-0.0898662
4.846	63.7963	13.1519	-1.22383	96.5922	-0.0898824
4.85433	63.873	13.1511	-1.22411	96.5862	-0.0899027
4.86267	63.9546	13.1503	-1.22437	96.5803	-0.0899221
4.871	64.0309	13.1495	-1.22471	96.5746	-0.0899467
4.87933	64.1103	13.1487	-1.22502	96.5685	-0.0899693
4.88767	64.1901	13.1479	-1.22532	96.5626	-0.0899917
4.896	64.2771	13.1471	-1.22564	96.5566	-0.0900154
4.90433	64.3561	13.1462	-1.22604	96.5504	-0.0900445
4.91267	64.4347	13.1454	-1.22642	96.5443	-0.0900722
4.921	64.5131	13.1446	-1.2268	96.538	-0.0901002
4.92933	64.5948	13.1437	-1.22716	96.5317	-0.0901265
4.93767	64.6694	13.1428	-1.22751	96.5254	-0.0901521
4.946	64.7471	13.142	-1.22793	96.5192	-0.0901836
4.95433	64.8307	13.1411	-1.22833	96.5128	-0.090213
4.96267	64.9097	13.1403	-1.22878	96.5065	-0.0902459
4.971	64.9861	13.1394	-1.22926	96.5001	-0.0902812
4.97933	65.0724	13.1385	-1.22974	96.4938	-0.090316
4.98767	65.1487	13.1377	-1.23023	96.4876	-0.0903524
4.996	65.2324	13.1368	-1.23078	96.4813	-0.0903925
5.00433	65.3107	13.136	-1.23132	96.4749	-0.0904325
5.01267	65.3883	13.1351	-1.2319	96.4686	-0.0904751
5.021	65.47	13.1342	-1.23251	96.4622	-0.0905194
5.02933	65.553	13.1333	-1.23306	96.4556	-0.09056
5.03767	65.6339	13.1325	-1.23368	96.4492	-0.0906054
5.046	65.7094	13.1316	-1.2343	96.4427	-0.0906511
5.05433	65.7885	13.1307	-1.23492	96.4362	-0.0906967
5.06267	65.8658	13.1298	-1.23556	96.4298	-0.0907439
5.071	65.9432	13.1289	-1.23622	96.4232	-0.090792
5.07933	66.0285	13.128	-1.23683	96.4167	-0.0908373
5.08767	66.1058	13.1272	-1.23748	96.4102	-0.0908847
5.096	66.1871	13.1263	-1.23813	96.4038	-0.0909325
5.10433	66.2687	13.1254	-1.23879	96.397	-0.0909809
5.11267	66.3522	13.1245	-1.23947	96.3906	-0.0910309
5.121	66.4267	13.1236	-1.24013	96.3842	-0.0910792
5.12933	66.516	13.1227	-1.24081	96.3774	-0.0911291
5.13767	66.5873	13.1218	-1.2415	96.3706	-0.0911797
5.146	66.6687	13.1208	-1.24223	96.3638	-0.0912335
5.15433	66.75	13.1199	-1.24293	96.3571	-0.0912853
5.16267	66.8302	13.119	-1.24367	96.3504	-0.091339
5.171	66.9036	13.1181	-1.2444	96.3437	-0.0913932
5.17933	66.9903	13.1172	-1.24518	96.3372	-0.0914499
5.18767	67.0697	13.1163	-1.2459	96.3306	-0.091503
5.196	67.1555	13.1154	-1.24664	96.3238	-0.0915572
5.20433	67.2293	13.1145	-1.24738	96.317	-0.0916114
5.21267	67.3132	13.1136	-1.24811	96.3105	-0.0916655
5.221	67.3902	13.1127	-1.24886	96.3039	-0.0917207
5.22933	67.4791	13.1118	-1.24961	96.2973	-0.0917759
5.23767	67.5551	13.1109	-1.25042	96.2907	-0.0918347
5.246	67.6405	13.11	-1.25119	96.2839	-0.0918915
5.25433	67.7146	13.109	-1.25198	96.2769	-0.0919494
5.26267	67.796	13.1081	-1.25273	96.27	-0.0920048
5.271	67.8753	13.1071	-1.25357	96.2631	-0.0920663
5.27933	67.9594	13.1062	-1.2544	96.2565	-0.092127
5.28767	68.0376	13.1053	-1.25523	96.2495	-0.092188
5.296	68.1201	13.1043	-1.25604	96.2426	-0.0922478
5.30433	68.1977	13.1034	-1.25687	96.2358	-0.092309
5.31267	68.2799	13.1025	-1.25768	96.2288	-0.0923684
5.321	68.3601	13.1015	-1.25848	96.2219	-0.092427
5.32933	68.4375	13.1006	-1.25934	96.2148	-0.0924902
5.33767	68.52	13.0996	-1.26019	96.2081	-0.0925525
5.346	68.6052	13.0987	-1.26107	96.2011	-0.0926173
5.35433	68.687	13.0977	-1.26189	96.1941	-0.0926777
5.36267	68.7685	13.0968	-1.26274	96.1873	-0.0927398
5.371	68.8461	13.0959	-1.2636	96.1804	-0.0928028
5.37933	68.9277	13.0949	-1.26444	96.1735	-0.0928647
5.38767	69.0058	13.094	-1.26528	96.1665	-0.0929267
5.396	69.0877	13.093	-1.26615	96.1595	-0.0929903
5.40433	69.168	13.0921	-1.26701	96.1526	-0.0930536
5.41267	69.2502	13.0911	-1.26787	96.1455	-0.0931165
5.421	69.3299	13.0902	-1.26872	96.1385	-0.0931793
5.42933	69.4122	13.0892	-1.26959	96.1317	-0.0932428
5.43767	69.4924	13.0883	-1.27048	96.1247	-0.0933084
5.446	69.5811	13.0873	-1.27133	96.1175	-0.093371
5.45433	69.6565	13.0863	-1.27217	96.1104	-0.0934326
5.46267	69.7442	13.0854	-1.27305	96.1034	-0.0934973
5.471	69.8143	13.0844	-1.27389	96.0963	-0.0935589
5.47933	69.901	13.0834	-1.27474	96.0891	-0.0936209
5.48767	69.9833	13.0825	-1.2756	96.0822	-0.093684
5.496	70.06	13.0816	-1.27645	96.0753	-0.093747
5.50433	70.1457	13.0806	-1.2773	96.0682	-0.0938089
5.51267	70.2231	13.0796	-1.27811	96.061	-0.0938684
5.521	70.3001	13.0786	-1.27893	96.0537	-0.0939287
5.52933	70.3862	13.0777	-1.27978	96.0467	-0.0939911
5.53767	70.4654	13.0767	-1.28064	96.0396	-0.0940547
5.546	70.5485	13.0757	-1.28149	96.0324	-0.0941171
5.55433	70.6307	13.0747	-1.28237	96.0252	-0.0941813
5.56267	70.7085	13.0738	-1.28325	96.0181	-0.0942459
5.571	70.79	13.0728	-1.2841	96.0108	-0.0943087
5.57933	70.8751	13.0718	-1.28495	96.0034	-0.0943713
5.58767	70.9575	13.0708	-1.2858	95.9962	-0.0944336
5.596	71.0399	13.0698	-1.28669	95.989	-0.094499
5.60433	71.1192	13.0688	-1.28756	95.982	-0.094563
5.61267	71.2031	13.0679	-1.28843	95.9749	-0.0946264
5.621	71.2781	13.0669	-1.28928	95.9677	-0.0946892
5.62933	71.3647	13.0659	-1.29012	95.9605	-0.0947511
5.63767	71.4444	13.0649	-1.29101	95.9533	-0.0948162
5.646	71.527	13.064	-1.29185	95.9461	-0.0948775
5.65433	71.6069	13.063	-1.29269	95.939	-0.0949395
5.66267	71.6856	13.062	-1.29355	95.9318	-0.0950024
5.671	71.7743	13.061	-1.29445	95.9244	-0.0950684
5.67933	71.8521	13.06	-1.2953	95.9172	-0.0951315
5.68767	71.9367	13.059	-1.29617	95.9099	-0.095195
5.696	72.0199	13.058	-1.29704	95.9025	-0.0952591
5.70433	72.0984	13.057	-1.29792	95.8952	-0.0953233
5.71267	72.18	13.056	-1.29881	95.8878	-0.0953887
5.721	72.2587	13.055	-1.29967	95.8804	-0.0954519
5.72933	72.3388	13.0541	-1.30055	95.8733	-0.095517
5.73767	72.4203	13.0531	-1.30145	95.8659	-0.0955828
5.746	72.5026	13.0521	-1.30235	95.8588	-0.0956486
5.75433	72.5851	13.0511	-1.30318	95.8516	-0.0957101
5.76267	72.6692	13.0501	-1.30402	95.8443	-0.0957718
5.771	72.7501	13.0491	-1.30488	95.837	-0.0958344
5.77933	72.8349	13.0481	-1.30572	95.8297	-0.0958965
5.78767	72.912	13.0471	-1.30658	95.8222	-0.0959593
5.796	72.9988	13.0461	-1.30742	95.8149	-0.0960211
5.80433	73.081	13.0451	-1.30825	95.8075	-0.0960819
5.81267	73.162	13.0441	-1.30908	95.8	-0.0961433
5.821	73.2474	13.0431	-1.30996	95.7927	-0.0962079
5.82933	73.3248	13.042	-1.31082	95.7849	-0.0962706
5.83767	73.4104	13.041	-1.31166	95.7772	-0.0963325
5.846	73.4875	13.0399	-1.31252	95.7696	-0.096396
5.85433	73.5693	13.0389	-1.31339	95.7622	-0.0964594
5.86267	73.6528	13.0379	-1.31428	95.7547	-0.0965247
5.871	73.737	13.0369	-1.31514	95.7473	-0.0965883
5.87933	73.8143	13.0359	-1.31601	95.7398	-0.0966525
5.88767	73.8976	13.0349	-1.31689	95.7326	-0.0967168
5.896	73.9854	13.0339	-1.31775	95.7253	-0.0967802
5.90433	74.0685	13.0329	-1.31859	95.7178	-0.0968414
5.91267	74.1492	13.0319	-1.31942	95.7106	-0.0969025
5.921	74.2255	13.0309	-1.32028	95.7034	-0.0969659
5.92933	74.3063	13.0299	-1.32114	95.6961	-0.0970289
5.93767	74.3919	13.0289	-1.32197	95.6885	-0.0970897
5.946	74.4728	13.0279	-1.3228	95.6812	-0.0971507
5.95433	74.5586	13.0268	-1.32365	95.6735	-0.097213
5.96267	74.6447	13.0258	-1.32447	95.666	-0.0972736
5.971	74.725	13.0248	-1.32529	95.6583	-0.0973338
5.97933	74.805	13.0237	-1.32613	95.6508	-0.0973952
5.98767	74.8889	13.0227	-1.32697	95.6433	-0.0974568
5.996	74.9674	13.0217	-1.32783	95.6358	-0.0975201
6.00433	75.0506	13.0207	-1.32867	95.6281	-0.0975818
6.01267	75.1388	13.0196	-1.3295	95.6203	-0.0976431
6.021	75.2128	13.0186	-1.33036	95.6127	-0.0977062
6.02933	75.2953	13.0175	-1.33119	95.6052	-0.0977669
6.03767	75.3776	13.0165	-1.33203	95.5978	-0.097829
6.046	75.4636	13.0155	-1.33292	95.5905	-0.0978937
6.05433	75.5482	13.0145	-1.3338	95.583	-0.0979588
6.06267	75.626	13.0135	-1.33465	95.5752	-0.0980208
6.071	75.7062	13.0124	-1.33549	95.5674	-0.0980828
6.07933	75.7906	13.0113	-1.33634	95.5596	-0.0981451
6.08767	75.8713	13.0103	-1.3372	95.5521	-0.0982086
6.096	75.9544	13.0093	-1.33806	95.5446	-0.0982715
6.10433	76.0354	13.0083	-1.33889	95.5371	-0.0983328
6.11267	76.1191	13.0072	-1.33975	95.5295	-0.0983959
6.121	76.2019	13.0061	-1.34058	95.5215	-0.0984568
6.12933	76.286	13.0051	-1.34142	95.5136	-0.0985181
6.13767	76.3669	13.004	-1.34225	95.5059	-0.0985797
6.146	76.4523	13.003	-1.3431	95.4984	-0.098642
6.15433	76.5313	13.002	-1.34393	95.491	-0.0987028
6.16267	76.6131	13.001	-1.34474	95.4836	-0.0987623
6.171	76.6998	12.9999	-1.34557	95.4759	-0.0988234
6.17933	76.7806	12.9989	-1.3464	95.4683	-0.0988837
6.18767	76.8603	12.9979	-1.34727	95.4606	-0.0989481
6.196	76.9459	12.9968	-1.3481	95.4528	-0.0990087
6.20433	77.0229	12.9957	-1.34896	95.4451	-0.099072
6.21267	77.1109	12.9947	-1.3498	95.4373	-0.0991337
6.221	77.1881	12.9936	-1.35061	95.4296	-0.0991934
6.22933	77.2696	12.9925	-1.35144	95.4216	-0.0992543
6.23767	77.3555	12.9915	-1.35227	95.4138	-0.0993153
6.246	77.4412	12.9904	-1.3531	95.406	-0.0993762
6.25433	77.5272	12.9894	-1.35391	95.3983	-0.0994354
6.26267	77.6026	12.9883	-1.35474	95.3905	-0.0994969
6.271	77.6878	12.9872	-1.35555	95.3826	-0.0995564
6.27933	77.7691	12.9862	-1.35636	95.375	-0.0996153
6.28767	77.8538	12.9851	-1.35714	95.3672	-0.099673
6.296	77.9323	12.9841	-1.35794	95.3593	-0.0997316
6.30433	78.0195	12.983	-1.35876	95.3514	-0.0997916
6.31267	78.0998	12.9819	-1.3596	95.3437	-0.0998538
6.321	78.1834	12.9809	-1.36046	95.3358	-0.0999169
6.32933	78.2645	12.9798	-1.3613	95.328	-0.0999787
6.33767	78.3472	12.9787	-1.36214	95.3201	-0.10004
6.346	78.4284	12.9777	-1.36295	95.3123	-0.100099
6.35433	78.5128	12.9766	-1.36375	95.3046	-0.100158
6.36267	78.5971	12.9755	-1.36459	95.2967	-0.10022
6.371	78.6775	12.9745	-1.36542	95.2888	-0.100281
6.37933	78.7609	12.9734	-1.36622	95.281	-0.10034
6.38767	78.8417	12.9723	-1.36704	95.2732	-0.1004
6.396	78.9219	12.9713	-1.36784	95.2653	-0.100459
6.40433	79.0113	12.9702	-1.36861	95.2573	-0.100515
6.41267	79.0894	12.9691	-1.3694	95.2495	-0.100573
6.421	79.1741	12.968	-1.37023	95.2415	-0.100634
6.42933	79.2554	12.967	-1.37108	95.2337	-0.100697
6.43767	79.3361	12.9659	-1.37191	95.2257	-0.100757
6.446	79.4193	12.9648	-1.37274	95.2178	-0.100819
6.45433	79.504	12.9637	-1.37357	95.21	-0.100879
6.46267	79.5844	12.9627	-1.37441	95.2021	-0.100941
6.471	79.6639	12.9616	-1.37527	95.1941	-0.101004
6.47933	79.7509	12.9605	-1.37608	95.1861	-0.101064
6.48767	79.8352	12.9594	-1.37689	95.1782	-0.101123
6.496	79.9183	12.9583	-1.37773	95.1701	-0.101185
6.50433	80.0014	12.9572	-1.37853	95.1622	-0.101244
6.51267	80.083	12.9561	-1.37934	95.1541	-0.101303
6.521	80.1642	12.955	-1.38015	95.1461	-0.101363
6.52933	80.2477	12.954	-1.38096	95.1383	-0.101422
6.53767	80.3319	12.9529	-1.38177	95.1303	-0.101481
6.546	80.4093	12.9518	-1.38256	95.1225	-0.10154
6.55433	80.4952	12.9507	-1.38337	95.1146	-0.101599
6.56267	80.5846	12.9497	-1.38417	95.1066	-0.101658
6.571	80.6591	12.9486	-1.38499	95.0986	-0.101718
6.57933	80.7451	12.9475	-1.38577	95.0907	-0.101776
6.58767	80.8268	12.9464	-1.38656	95.0825	-0.101834
6.596	80.9062	12.9453	-1.38736	95.0746	-0.101892
6.60433	80.9959	12.9442	-1.38813	95.0664	-0.101949
6.61267	81.0713	12.9431	-1.3889	95.0581	-0.102005
6.621	81.1557	12.942	-1.3897	95.0502	-0.102064
6.62933	81.2397	12.9409	-1.39047	95.0421	-0.102121
6.63767	81.3199	12.9398	-1.39118	95.0342	-0.102173
6.646	81.404	12.9387	-1.39194	95.0264	-0.102228
6.65433	81.4874	12.9377	-1.39267	95.0185	-0.102282
6.66267	81.568	12.9366	-1.39342	95.0106	-0.102338
6.671	81.6535	12.9355	-1.39415	95.0026	-0.102391
6.67933	81.7345	12.9344	-1.39487	94.9945	-0.102444
6.68767	81.8174	12.9333	-1.3956	94.9865	-0.102498
6.696	81.9017	12.9322	-1.39633	94.9785	-0.102551
6.70433	81.987	12.9311	-1.39705	94.9703	-0.102604
6.71267	82.0686	12.93	-1.39777	94.9624	-0.102657
6.721	82.1514	12.9289	-1.39851	94.9542	-0.102711
6.72933	82.2371	12.9278	-1.39923	94.946	-0.102764
6.73767	82.3208	12.9267	-1.39997	94.938	-0.102818
6.746	82.3978	12.9256	-1.40068	94.9301	-0.102871
6.75433	82.4791	12.9245	-1.40144	94.9221	-0.102926
6.76267	82.5649	12.9235	-1.40214	94.9142	-0.102978
6.771	82.6472	12.9224	-1.40289	94.9062	-0.103033
6.77933	82.7285	12.9213	-1.40361	94.8982	-0.103086
6.78767	82.8132	12.9202	-1.40431	94.8903	-0.103137
6.796	82.8971	12.9191	-1.40505	94.8821	-0.103192
6.80433	82.9817	12.918	-1.40576	94.874	-0.103244
6.81267	83.063	12.9169	-1.40648	94.8659	-0.103296
6.821	83.1494	12.9158	-1.40719	94.8577	-0.103349
6.82933	83.2217	12.9147	-1.40786	94.8496	-0.103398
6.83767	83.3073	12.9136	-1.4085	94.8416	-0.103445
6.846	83.3886	12.9125	-1.40918	94.8335	-0.103495
6.85433	83.477	12.9114	-1.40982	94.8253	-0.103542
6.86267	83.5619	12.9103	-1.41051	94.8174	-0.103592
6.871	83.642	12.9092	-1.41118	94.8092	-0.103642
6.87933	83.7262	12.9081	-1.41183	94.8011	-0.103689
6.88767	83.8026	12.907	-1.41251	94.7931	-0.10374
6.896	83.8918	12.9059	-1.41313	94.7851	-0.103785
6.90433	83.9715	12.9048	-1.41376	94.777	-0.103831
6.91267	84.0527	12.9037	-1.41441	94.769	-0.103879
6.921	84.1366	12.9026	-1.41508	94.7608	-0.103928
6.92933	84.2183	12.9015	-1.41571	94.7528	-0.103975
6.93767	84.3036	12.9004	-1.41633	94.7447	-0.10402
6.946	84.382	12.8993	-1.41697	94.7366	-0.104067
6.95433	84.4674	12.8982	-1.41758	94.7285	-0.104112
6.96267	84.5494	12.8971	-1.4182	94.7205	-0.104158
6.971	84.632	12.896	-1.41881	94.7122	-0.104202
6.97933	84.7168	12.8949	-1.41942	94.7043	-0.104247
6.98767	84.7967	12.8938	-1.42001	94.6964	-0.10429
6.996	84.8857	12.8927	-1.42061	94.6882	-0.104334
7.00433	84.9716	12.8916	-1.42119	94.6801	-0.104377
7.01267	85.0489	12.8905	-1.42177	94.672	-0.10442
7.021	85.1315	12.8894	-1.42239	94.6639	-0.104465
7.02933	85.2105	12.8883	-1.42293	94.6557	-0.104505
7.03767	85.2937	12.8872	-1.42348	94.6478	-0.104545
7.046	85.3782	12.8861	-1.42401	94.6397	-0.104584
7.05433	85.4598	12.885	-1.42455	94.6317	-0.104624
7.06267	85.5525	12.8839	-1.42513	94.6234	-0.104666
7.071	85.6315	12.8828	-1.42571	94.6153	-0.104709
7.07933	85.7094	12.8817	-1.42625	94.6073	-0.104748
7.08767	85.7966	12.8806	-1.42679	94.5991	-0.104788
7.096	85.8808	12.8794	-1.42733	94.5907	-0.104828
7.10433	85.9599	12.8783	-1.42782	94.5825	-0.104864
7.11267	86.0454	12.8772	-1.42836	94.5742	-0.104903
7.121	86.1233	12.876	-1.42888	94.5657	-0.104942
7.12933	86.2113	12.8749	-1.42939	94.5573	-0.104979
7.13767	86.2928	12.8737	-1.42991	94.5491	-0.105017
7.146	86.3695	12.8726	-1.4304	94.541	-0.105053
7.15433	86.4555	12.8715	-1.43092	94.5325	-0.105091
7.16267	86.5401	12.8704	-1.43146	94.5241	-0.105131
7.171	86.6217	12.8693	-1.43195	94.5161	-0.105167
7.17933	86.7067	12.8682	-1.43244	94.5082	-0.105203
7.18767	86.7871	12.8671	-1.43293	94.5	-0.105239
7.196	86.8634	12.866	-1.4334	94.492	-0.105274
7.20433	86.9465	12.8649	-1.43393	94.484	-0.105313
7.21267	87.0339	12.8638	-1.43444	94.4763	-0.10535
7.221	87.1153	12.8627	-1.43491	94.4682	-0.105385
7.22933	87.1963	12.8616	-1.43536	94.4602	-0.105417
7.23767	87.2803	12.8606	-1.43579	94.4522	-0.105449
7.246	87.3658	12.8595	-1.43622	94.4441	-0.105481
7.25433	87.4443	12.8583	-1.43672	94.436	-0.105517
7.26267	87.529	12.8573	-1.43718	94.428	-0.105551
7.271	87.6132	12.8562	-1.43763	94.4199	-0.105584
7.27933	87.6912	12.8551	-1.4381	94.412	-0.105619
7.28767	87.7769	12.854	-1.43849	94.4041	-0.105647
7.296	87.8604	12.8529	-1.43888	94.3958	-0.105676
7.30433	87.9444	12.8518	-1.43929	94.3877	-0.105706
7.31267	88.0246	12.8507	-1.43974	94.3797	-0.105739
7.321	88.1063	12.8496	-1.44017	94.3717	-0.105771
7.32933	88.1926	12.8485	-1.44056	94.3638	-0.1058
7.33767	88.2708	12.8474	-1.44087	94.3557	-0.105822
7.346	88.3567	12.8463	-1.44124	94.3477	-0.105849
7.35433	88.4431	12.8452	-1.44161	94.3396	-0.105877
7.36267	88.5216	12.8441	-1.44193	94.3314	-0.1059
7.371	88.6093	12.843	-1.44229	94.3233	-0.105926
7.37933	88.6909	12.8419	-1.44264	94.3152	-0.105953
7.38767	88.7679	12.8408	-1.44298	94.3073	-0.105977
7.396	88.8555	12.8397	-1.44327	94.299	-0.105998
7.40433	88.9412	12.8386	-1.44356	94.2908	-0.10602
7.41267	89.0204	12.8375	-1.44388	94.2827	-0.106044
7.421	89.1014	12.8364	-1.4442	94.2747	-0.106067
7.42933	89.1863	12.8353	-1.44447	94.2666	-0.106087
7.43767	89.2708	12.8342	-1.44474	94.2586	-0.106107
7.446	89.3584	12.8331	-1.44504	94.2506	-0.106128
7.45433	89.4367	12.832	-1.44533	94.2423	-0.10615
7.46267	89.5207	12.8309	-1.4456	94.2344	-0.10617
7.471	89.6047	12.8298	-1.44589	94.2265	-0.106191
7.47933	89.6882	12.8287	-1.44618	94.2185	-0.106212
7.48767	89.7708	12.8277	-1.44641	94.2108	-0.106229
7.496	89.8477	12.8266	-1.4466	94.2028	-0.106243
7.50433	89.9364	12.8255	-1.44683	94.1948	-0.10626
7.51267	90.0192	12.8245	-1.44708	94.1871	-0.106278
7.521	90.1026	12.8234	-1.4473	94.1793	-0.106295
7.52933	90.1823	12.8223	-1.4475	94.1715	-0.106309
7.53767	90.2697	12.8213	-1.44767	94.1638	-0.106321
7.546	90.3503	12.8202	-1.44784	94.156	-0.106334
7.55433	90.4288	12.8192	-1.44797	94.1482	-0.106344
7.56267	90.5166	12.8181	-1.44808	94.1403	-0.106352
7.571	90.5966	12.817	-1.44822	94.1323	-0.106362
7.57933	90.6819	12.8159	-1.44838	94.1245	-0.106374
7.58767	90.765	12.8149	-1.44849	94.1166	-0.106382
7.596	90.8452	12.8137	-1.44859	94.1084	-0.106389
7.60433	90.9273	12.8127	-1.44866	94.1004	-0.106394
7.61267	91.0099	12.8116	-1.44873	94.0927	-0.1064
7.621	91.0967	12.8105	-1.44881	94.0849	-0.106405
7.62933	91.1792	12.8095	-1.4489	94.0772	-0.106412
7.63767	91.2626	12.8084	-1.44895	94.0693	-0.106416
7.646	91.3467	12.8074	-1.449	94.0615	-0.106419
7.65433	91.431	12.8063	-1.44903	94.0537	-0.106422
7.66267	91.5111	12.8052	-1.44904	94.0458	-0.106423
7.671	91.5929	12.8042	-1.44905	94.0381	-0.106423
7.67933	91.6728	12.8031	-1.44902	94.0305	-0.106421
7.68767	91.7637	12.8021	-1.44899	94.023	-0.106418
7.696	91.844	12.8011	-1.44893	94.0152	-0.106415
7.70433	91.9252	12.8	-1.44886	94.0075	-0.106409
7.71267	92.0079	12.7989	-1.44875	93.9997	-0.106401
7.721	92.0945	12.7979	-1.44865	93.9921	-0.106394
7.72933	92.1732	12.7969	-1.44855	93.9846	-0.106386
7.73767	92.2558	12.7958	-1.44844	93.977	-0.106378
7.746	92.3416	12.7949	-1.4483	93.9697	-0.106368
7.75433	92.4228	12.7939	-1.44814	93.9623	-0.106356
7.76267	92.4999	12.7928	-1.44798	93.9549	-0.106345
7.771	92.5848	12.7918	-1.44785	93.9473	-0.106335
7.77933	92.6689	12.7908	-1.44768	93.9399	-0.106323
7.78767	92.75	12.7898	-1.44752	93.9324	-0.106311
7.796	92.8371	12.7888	-1.44731	93.925	-0.106295
7.80433	92.9164	12.7877	-1.44712	93.9174	-0.106281
7.81267	93.002	12.7867	-1.44692	93.9099	-0.106266
7.821	93.0856	12.7857	-1.44665	93.9024	-0.106247
7.82933	93.1748	12.7847	-1.44642	93.8949	-0.10623
7.83767	93.2541	12.7837	-1.44617	93.8875	-0.106211
7.846	93.3401	12.7826	-1.44585	93.8798	-0.106188
7.85433	93.4184	12.7816	-1.4455	93.8723	-0.106162
7.86267	93.5011	12.7805	-1.44515	93.8646	-0.106137
7.871	93.584	12.7796	-1.44477	93.8573	-0.106108
7.87933	93.6669	12.7785	-1.44436	93.8499	-0.106078
7.88767	93.7546	12.7776	-1.44392	93.8427	-0.106047
7.896	93.8351	12.7766	-1.44346	93.8355	-0.106013
7.90433	93.9162	12.7756	-1.44301	93.8286	-0.105979
7.91267	94.003	12.7747	-1.4425	93.8217	-0.105942
7.921	94.0905	12.7737	-1.442	93.8146	-0.105905
7.92933	94.1732	12.7728	-1.44151	93.8077	-0.10587
7.93767	94.2628	12.7719	-1.44098	93.8008	-0.10583
7.946	94.3445	12.7709	-1.44042	93.7938	-0.105789
7.95433	94.4256	12.77	-1.43986	93.7868	-0.105748
7.96267	94.5062	12.769	-1.43929	93.7799	-0.105706
7.971	94.589	12.7681	-1.4387	93.7729	-0.105663
7.97933	94.6739	12.7671	-1.43805	93.766	-0.105615
7.98767	94.7534	12.7661	-1.43739	93.7586	-0.105567
7.996	94.836	12.7652	-1.4367	93.7516	-0.105516
8.00433	94.9231	12.7642	-1.43597	93.7445	-0.105462
8.01267	95.0054	12.7633	-1.43523	93.7376	-0.105408
8.021	95.0927	12.7623	-1.43448	93.7308	-0.105353
8.02933	95.1784	12.7614	-1.43375	93.7242	-0.105299
8.03767	95.2644	12.7605	-1.43291	93.7174	-0.105238
8.046	95.3437	12.7596	-1.43208	93.7109	-0.105176
8.05433	95.4301	12.7587	-1.43121	93.7045	-0.105113
8.06267	95.5112	12.7579	-1.43034	93.6981	-0.105049
8.071	95.5976	12.757	-1.42944	93.6916	-0.104983
8.07933	95.6791	12.7561	-1.42849	93.685	-0.104913
8.08767	95.7607	12.7552	-1.42756	93.6785	-0.104844
8.096	95.8527	12.7543	-1.42658	93.6718	-0.104773
8.10433	95.9341	12.7534	-1.42558	93.6653	-0.104699
8.11267	96.0157	12.7525	-1.42449	93.659	-0.104619
8.121	96.0957	12.7517	-1.4234	93.6528	-0.104539
8.12933	96.1896	12.7508	-1.42225	93.6463	-0.104455
8.13767	96.2715	12.75	-1.42107	93.6399	-0.104368
8.146	96.3578	12.7491	-1.41986	93.6335	-0.10428
8.15433	96.4411	12.7483	-1.41867	93.6274	-0.104192
8.16267	96.5268	12.7474	-1.41745	93.6212	-0.104102
8.171	96.613	12.7466	-1.41616	93.6152	-0.104008
8.17933	96.6943	12.7458	-1.41484	93.6093	-0.103911
8.18767	96.7796	12.745	-1.41351	93.6035	-0.103813
8.196	96.8678	12.7442	-1.41216	93.5975	-0.103714
8.20433	96.9568	12.7434	-1.41076	93.5916	-0.103611
8.21267	97.0399	12.7426	-1.40938	93.586	-0.103509
8.221	97.1189	12.7418	-1.40798	93.5803	-0.103407
8.22933	97.2071	12.7411	-1.4065	93.5749	-0.103298
8.23767	97.2942	12.7403	-1.40497	93.5692	-0.103186
8.246	97.3761	12.7396	-1.40343	93.5637	-0.103073
8.25433	97.4559	12.7389	-1.40188	93.5584	-0.102959
8.26267	97.5408	12.7381	-1.40027	93.5531	-0.102841
8.271	97.6263	12.7373	-1.39866	93.5473	-0.102722
8.27933	97.7155	12.7366	-1.39703	93.5418	-0.102602
8.28767	97.7911	12.7359	-1.3954	93.5364	-0.102483
8.296	97.8796	12.7351	-1.39369	93.5307	-0.102357
8.30433	97.9642	12.7343	-1.39193	93.5252	-0.102228
8.31267	98.0464	12.7336	-1.39022	93.5197	-0.102102
8.321	98.1339	12.7329	-1.3885	93.5144	-0.101976
8.32933	98.2193	12.7322	-1.38675	93.5093	-0.101847
8.33767	98.3057	12.7315	-1.38493	93.504	-0.101714
8.346	98.3926	12.7307	-1.38312	93.4988	-0.101581
8.35433	98.4711	12.7301	-1.38129	93.4938	-0.101446
8.36267	98.561	12.7294	-1.37943	93.4888	-0.10131
8.371	98.6442	12.7287	-1.37754	93.4838	-0.101171
8.37933	98.7312	12.728	-1.37565	93.479	-0.101032
8.38767	98.8157	12.7274	-1.37379	93.4741	-0.100896
8.396	98.8987	12.7267	-1.37192	93.4693	-0.100759
8.40433	98.985	12.726	-1.36999	93.4642	-0.100617
8.41267	99.0732	12.7254	-1.36805	93.4594	-0.100474
8.421	99.1548	12.7247	-1.36615	93.4547	-0.100334
8.42933	99.241	12.7241	-1.36419	93.4499	-0.100191
8.43767	99.3256	12.7234	-1.36223	93.4451	-0.100046
8.446	99.4092	12.7227	-1.36028	93.4401	-0.0999037
8.45433	99.497	12.7221	-1.35831	93.4353	-0.0997588
8.46267	99.5781	12.7214	-1.35634	93.4304	-0.0996143
8.471	99.6644	12.7208	-1.35433	93.4258	-0.0994666
8.47933	99.7485	12.7201	-1.35234	93.4208	-0.09932
8.48767	99.8372	12.7195	-1.35033	93.4161	-0.0991725
8.496	99.9259	12.7188	-1.34834	93.4114	-0.0990262
8.50433	100.009	12.7182	-1.34631	93.4066	-0.0988779
8.51267	100.094	12.7175	-1.34431	93.4018	-0.0987305
8.521	100.177	12.7169	-1.34229	93.3969	-0.098582
8.52933	100.261	12.7163	-1.34022	93.3925	-0.0984305
8.53767	100.348	12.7157	-1.33821	93.388	-0.0982827
8.546	100.433	12.715	-1.33621	93.3835	-0.0981359
8.55433	100.519	12.7144	-1.3342	93.3788	-0.0979879
8.56267	100.603	12.7138	-1.33216	93.3742	-0.0978383
8.571	100.687	12.7132	-1.33013	93.3698	-0.0976893
8.57933	100.773	12.7126	-1.32805	93.3653	-0.0975363
8.58767	100.86	12.7119	-1.32602	93.3607	-0.097387
8.596	100.946	12.7114	-1.32401	93.3566	-0.0972399
8.60433	101.032	12.7108	-1.322	93.3525	-0.0970919
8.61267	101.118	12.7102	-1.31997	93.348	-0.0969426
8.621	101.202	12.7096	-1.31792	93.3437	-0.0967921
8.62933	101.289	12.709	-1.31589	93.3394	-0.0966433
8.63767	101.372	12.7085	-1.3139	93.3354	-0.0964968
8.646	101.459	12.7079	-1.31186	93.3312	-0.0963472
8.65433	101.541	12.7073	-1.30981	93.327	-0.0961967
8.66267	101.623	12.7067	-1.3078	93.3226	-0.0960492
8.671	101.708	12.7062	-1.30574	93.3183	-0.0958982
8.67933	101.8	12.7056	-1.3037	93.3138	-0.0957478
8.68767	101.88	12.705	-1.30165	93.3095	-0.0955974
8.696	101.966	12.7044	-1.29964	93.3053	-0.0954499
8.70433	102.056	12.7038	-1.29761	93.3012	-0.0953008
8.71267	102.136	12.7033	-1.29556	93.2969	-0.0951505
8.721	102.223	12.7027	-1.29351	93.2927	-0.0949998
8.72933	102.308	12.7021	-1.2915	93.2886	-0.0948517
8.73767	102.393	12.7016	-1.28949	93.2846	-0.0947046
8.746	102.479	12.701	-1.2875	93.2805	-0.094558
8.75433	102.566	12.7005	-1.28551	93.2766	-0.0944123
8.76267	102.649	12.6999	-1.28352	93.2727	-0.0942663
8.771	102.733	12.6994	-1.28155	93.2685	-0.0941214
8.77933	102.817	12.6988	-1.27955	93.2643	-0.0939746
8.78767	102.904	12.6983	-1.27758	93.2603	-0.0938301
8.796	102.99	12.6977	-1.27561	93.256	-0.0936849
8.80433	103.073	12.6971	-1.27364	93.2519	-0.0935403
8.81267	103.159	12.6966	-1.27168	93.2478	-0.0933966
8.821	103.245	12.696	-1.26973	93.2437	-0.0932531
8.82933	103.331	12.6955	-1.26778	93.2397	-0.09311
8.83767	103.414	12.6949	-1.26585	93.2356	-0.0929685
8.846	103.501	12.6943	-1.26391	93.2315	-0.0928255
8.85433	103.587	12.6938	-1.26197	93.2274	-0.0926835
8.86267	103.677	12.6932	-1.26004	93.2233	-0.0925415
8.871	103.76	12.6927	-1.2581	93.2194	-0.0923988
8.87933	103.844	12.6922	-1.25616	93.2156	-0.0922564
8.88767	103.929	12.6916	-1.25424	93.2117	-0.0921159
8.896	104.012	12.6911	-1.25235	93.2078	-0.0919765
8.90433	104.102	12.6906	-1.25047	93.2038	-0.091839
8.91267	104.189	12.69	-1.24856	93.2	-0.0916988
8.921	104.275	12.6895	-1.24666	93.1961	-0.0915589
8.92933	104.352	12.689	-1.24475	93.1924	-0.0914188
8.93767	104.437	12.6885	-1.24284	93.1887	-0.0912786
8.946	104.521	12.688	-1.24101	93.185	-0.0911436
8.95433	104.61	12.6875	-1.23915	93.1812	-0.0910073
8.96267	104.694	12.687	-1.23732	93.1774	-0.090873
8.971	104.777	12.6864	-1.23548	93.1734	-0.0907375
8.97933	104.864	12.6859	-1.23365	93.1695	-0.0906031
8.98767	104.953	12.6854	-1.2318	93.1657	-0.0904674
8.996	105.036	12.6849	-1.22998	93.1618	-0.0903337
9.00433	105.122	12.6843	-1.22816	93.158	-0.0901998
9.01267	105.206	12.6838	-1.22635	93.154	-0.0900669
9.021	105.289	12.6832	-1.22454	93.15	-0.0899344
9.02933	105.374	12.6827	-1.22272	93.1463	-0.0898006
9.03767	105.462	12.6822	-1.22091	93.1426	-0.0896676
9.046	105.546	12.6817	-1.21907	93.1389	-0.0895329
9.05433	105.629	12.6812	-1.21726	93.1353	-0.0893998
9.06267	105.711	12.6807	-1.21544	93.1316	-0.0892657
9.071	105.797	12.6802	-1.21366	93.128	-0.089135
9.07933	105.881	12.6798	-1.21189	93.1244	-0.0890052
9.08767	105.972	12.6793	-1.21011	93.1208	-0.0888744
9.096	106.052	12.6788	-1.20838	93.1174	-0.0887472
9.10433	106.14	12.6783	-1.20662	93.1139	-0.0886184
9.11267	106.229	12.6778	-1.20488	93.1101	-0.0884901
9.121	106.308	12.6773	-1.20318	93.1063	-0.0883654
9.12933	106.391	12.6768	-1.20151	93.1026	-0.0882431
9.13767	106.483	12.6763	-1.19984	93.0991	-0.0881202
9.146	106.567	12.6758	-1.19816	93.0954	-0.0879966
9.15433	106.649	12.6753	-1.19646	93.0918	-0.0878719
9.16267	106.731	12.6748	-1.19477	93.0883	-0.0877476
9.171	106.819	12.6744	-1.19311	93.0848	-0.087626
9.17933	106.906	12.6739	-1.19142	93.0811	-0.0875021
9.18767	106.988	12.6734	-1.1898	93.0775	-0.0873827
9.196	107.075	12.6729	-1.18813	93.0739	-0.0872604
9.20433	107.163	12.6724	-1.18647	93.0705	-0.0871382
9.21267	107.245	12.672	-1.18482	93.067	-0.0870168
9.221	107.328	12.6715	-1.18318	93.0634	-0.086897
9.22933	107.413	12.671	-1.18156	93.06	-0.0867779
9.23767	107.497	12.6705	-1.17996	93.0565	-0.0866598
9.246	107.582	12.67	-1.17835	93.053	-0.0865422
9.25433	107.665	12.6695	-1.17677	93.0494	-0.0864261
9.26267	107.751	12.6691	-1.1752	93.0459	-0.0863108
9.271	107.834	12.6686	-1.17361	93.0425	-0.0861939
9.27933	107.921	12.6681	-1.17206	93.039	-0.0860798
9.28767	108.007	12.6677	-1.17051	93.0357	-0.0859659
9.296	108.096	12.6672	-1.16894	93.032	-0.0858506
9.30433	108.176	12.6667	-1.16737	93.0284	-0.0857357
9.31267	108.26	12.6662	-1.16583	93.0249	-0.0856222
9.321	108.343	12.6657	-1.16426	93.0212	-0.0855069
9.32933	108.43	12.6652	-1.16269	93.0174	-0.0853917
9.33767	108.517	12.6647	-1.16115	93.0139	-0.0852784
9.346	108.599	12.6642	-1.15962	93.0103	-0.085166
9.35433	108.687	12.6638	-1.1581	93.0069	-0.0850549
9.36267	108.765	12.6633	-1.1566	93.0035	-0.0849442
9.371	108.855	12.6628	-1.15504	93	-0.0848302
9.37933	108.94	12.6624	-1.15349	92.9967	-0.0847164
9.38767	109.024	12.6619	-1.15194	92.9934	-0.0846025
9.396	109.108	12.6615	-1.15041	92.9901	-0.0844899
9.40433	109.194	12.661	-1.14892	92.9867	-0.0843804
9.41267	109.284	12.6606	-1.14747	92.9836	-0.0842743
9.421	109.366	12.6601	-1.14599	92.9801	-0.0841653
9.42933	109.45	12.6596	-1.14449	92.9767	-0.0840555
9.43767	109.533	12.6592	-1.14301	92.9732	-0.0839468
9.446	109.62	12.6587	-1.14154	92.9697	-0.0838386
9.45433	109.703	12.6582	-1.14011	92.9662	-0.0837336
9.46267	109.784	12.6578	-1.13869	92.9628	-0.0836289
9.471	109.864	12.6573	-1.13731	92.9594	-0.0835275
9.47933	109.952	12.6568	-1.13589	92.9561	-0.0834235
9.48767	110.04	12.6564	-1.13448	92.9527	-0.0833203
9.496	110.125	12.6559	-1.13307	92.9494	-0.0832167
9.50433	110.212	12.6555	-1.13167	92.9464	-0.0831138
9.51267	110.291	12.6551	-1.13027	92.9433	-0.0830109
9.521	110.375	12.6547	-1.12886	92.9403	-0.0829072
9.52933	110.464	12.6542	-1.12746	92.937	-0.0828047
9.53767	110.546	12.6538	-1.12609	92.9339	-0.0827034
9.546	110.632	12.6533	-1.12472	92.9303	-0.0826031
9.55433	110.719	12.6529	-1.1233	92.9268	-0.0824993
9.56267	110.8	12.6524	-1.12194	92.9237	-0.0823988
9.571	110.889	12.652	-1.12055	92.9204	-0.0822973
9.57933	110.975	12.6515	-1.11915	92.9171	-0.082194
9.58767	111.057	12.6511	-1.11776	92.914	-0.0820919
9.596	111.138	12.6507	-1.11641	92.9109	-0.0819927
9.60433	111.223	12.6502	-1.11508	92.9077	-0.081895
9.61267	111.313	12.6498	-1.11377	92.9046	-0.0817988
9.621	111.393	12.6494	-1.11244	92.9013	-0.081701
9.62933	111.478	12.649	-1.11109	92.8985	-0.0816023
9.63767	111.566	12.6486	-1.1098	92.8956	-0.0815074
9.646	111.648	12.6482	-1.1085	92.8924	-0.0814116
9.65433	111.734	12.6478	-1.10721	92.8895	-0.0813172
9.66267	111.818	12.6473	-1.10596	92.8864	-0.0812253
9.671	111.903	12.6469	-1.10467	92.883	-0.0811304
9.67933	111.987	12.6465	-1.10337	92.8799	-0.0810353
9.68767	112.07	12.646	-1.1021	92.8766	-0.0809419
9.696	112.157	12.6456	-1.1008	92.8732	-0.0808466
9.70433	112.239	12.6451	-1.09952	92.8698	-0.0807526
9.71267	112.323	12.6446	-1.09828	92.8664	-0.0806614
9.721	112.406	12.6442	-1.097	92.8631	-0.0805676
9.72933	112.496	12.6437	-1.09577	92.8598	-0.0804771
9.73767	112.581	12.6433	-1.09452	92.8566	-0.0803856
9.746	112.666	12.6428	-1.09328	92.8532	-0.0802941
9.75433	112.753	12.6424	-1.09206	92.8499	-0.0802043
9.76267	112.834	12.642	-1.09083	92.8468	-0.080114
9.771	112.92	12.6416	-1.08962	92.8438	-0.0800251
9.77933	113.003	12.6411	-1.08843	92.8407	-0.0799382
9.78767	113.083	12.6407	-1.08726	92.8377	-0.0798518
9.796	113.171	12.6403	-1.08603	92.8346	-0.079762
9.80433	113.256	12.6399	-1.08485	92.8315	-0.0796753
9.81267	113.339	12.6394	-1.08363	92.8283	-0.0795854
9.821	113.426	12.639	-1.08241	92.8252	-0.079496
9.82933	113.511	12.6386	-1.08119	92.8224	-0.0794063
9.83767	113.596	12.6382	-1.08003	92.8194	-0.0793213
9.846	113.678	12.6378	-1.07887	92.8162	-0.0792355
9.85433	113.768	12.6374	-1.0777	92.813	-0.0791502
9.86267	113.845	12.6369	-1.0765	92.8099	-0.0790617
9.871	113.93	12.6365	-1.07532	92.8068	-0.0789749
9.87933	114.018	12.6361	-1.07421	92.8037	-0.0788939
9.88767	114.101	12.6357	-1.07308	92.8006	-0.0788106
9.896	114.188	12.6353	-1.07196	92.7977	-0.0787286
9.90433	114.275	12.6348	-1.07086	92.7945	-0.0786473
9.91267	114.356	12.6344	-1.06973	92.7911	-0.0785643
9.921	114.439	12.634	-1.06858	92.7882	-0.0784801
9.92933	114.521	12.6336	-1.06745	92.7851	-0.0783974
9.93767	114.606	12.6331	-1.06631	92.7819	-0.0783133
9.946	114.694	12.6327	-1.06522	92.7789	-0.0782335
9.95433	114.776	12.6323	-1.06411	92.7758	-0.0781516
9.96267	114.863	12.6318	-1.06296	92.7724	-0.078067
9.971	114.947	12.6314	-1.06181	92.7694	-0.0779832
9.97933	115.028	12.631	-1.06069	92.7662	-0.0779009
9.98767	115.115	12.6306	-1.0596	92.7632	-0.0778202
9.996	115.197	12.6302	-1.05852	92.7605	-0.0777414
10.0043	115.286	12.6298	-1.05743	92.7575	-0.0776608
10.0127	115.369	12.6295	-1.05636	92.755	-0.0775826
10.021	115.454	12.6291	-1.0553	92.7523	-0.0775047
10.0293	115.537	12.6287	-1.05422	92.7496	-0.0774257
10.0377	115.628	12.6284	-1.05318	92.7469	-0.0773493
10.046	115.713	12.628	-1.05214	92.7443	-0.0772728
10.0543	115.792	12.6276	-1.0511	92.7414	-0.0771964
10.0627	115.88	12.6272	-1.05006	92.7385	-0.0771198
10.071	115.96	12.6268	-1.04901	92.7354	-0.0770426
10.0793	116.048	12.6264	-1.04797	92.7324	-0.0769664
10.0877	116.133	12.626	-1.04694	92.7294	-0.076891
10.096	116.218	12.6255	-1.04591	92.726	-0.0768152
10.1043	116.299	12.6251	-1.04486	92.7228	-0.076738
10.1127	116.383	12.6247	-1.04384	92.7199	-0.0766632
10.121	116.47	12.6243	-1.04284	92.7169	-0.0765899
10.1293	116.55	12.6239	-1.04183	92.714	-0.0765154
10.1377	116.635	12.6235	-1.04083	92.7111	-0.0764422
10.146	116.721	12.6231	-1.03984	92.7083	-0.0763696
10.1543	116.81	12.6227	-1.03886	92.7057	-0.076297
10.1627	116.889	12.6224	-1.03786	92.7028	-0.0762239
10.171	116.977	12.622	-1.03684	92.6999	-0.0761492
10.1793	117.058	12.6216	-1.03585	92.6973	-0.0760763
10.1877	117.144	12.6212	-1.03488	92.6945	-0.0760051
10.196	117.228	12.6208	-1.03389	92.6915	-0.0759323
10.2043	117.307	12.6204	-1.03288	92.6887	-0.075858
10.2127	117.394	12.6201	-1.03191	92.686	-0.0757871
10.221	117.475	12.6197	-1.03094	92.6832	-0.0757154
10.2293	117.564	12.6193	-1.02996	92.6804	-0.0756439
10.2377	117.645	12.6189	-1.029	92.6777	-0.075573
10.246	117.735	12.6186	-1.02803	92.675	-0.0755022
10.2543	117.813	12.6182	-1.02714	92.6723	-0.0754364
10.2627	117.899	12.6178	-1.02618	92.6693	-0.0753664
10.271	117.982	12.6174	-1.02526	92.6666	-0.0752984
10.2793	118.067	12.6171	-1.02432	92.6639	-0.0752293
10.2877	118.149	12.6166	-1.0234	92.6609	-0.0751615
10.296	118.234	12.6163	-1.02247	92.658	-0.0750939
10.3043	118.317	12.6159	-1.02153	92.6551	-0.0750247
10.3127	118.409	12.6155	-1.02062	92.6523	-0.0749574
10.321	118.489	12.6151	-1.01972	92.6495	-0.0748914
10.3293	118.573	12.6147	-1.01884	92.6466	-0.0748272
10.3377	118.659	12.6143	-1.0179	92.6438	-0.074758
10.346	118.743	12.6139	-1.01704	92.6408	-0.074695
10.3543	118.83	12.6135	-1.01613	92.6379	-0.0746279
10.3627	118.915	12.6131	-1.01524	92.6349	-0.0745629
10.371	118.991	12.6127	-1.01434	92.6321	-0.0744967
10.3793	119.083	12.6123	-1.01345	92.6292	-0.0744314
10.3877	119.164	12.6119	-1.01263	92.6261	-0.0743711
10.396	119.248	12.6115	-1.01175	92.6233	-0.0743064
10.4043	119.331	12.6111	-1.01085	92.6203	-0.0742403
10.4127	119.419	12.6107	-1.00997	92.6172	-0.0741753
10.421	119.502	12.6103	-1.00915	92.6142	-0.0741152
10.4293	119.591	12.6099	-1.00828	92.6112	-0.0740516
10.4377	119.669	12.6095	-1.00743	92.6084	-0.0739891
10.446	119.756	12.6091	-1.00659	92.6057	-0.0739272
10.4543	119.842	12.6088	-1.00576	92.603	-0.0738661
10.4627	119.925	12.6085	-1.00495	92.6007	-0.0738067
10.471	120.009	12.6081	-1.00408	92.5983	-0.0737432
10.4793	120.092	12.6078	-1.00328	92.5958	-0.0736844
10.4877	120.178	12.6075	-1.00248	92.5933	-0.0736258
10.496	120.264	12.6072	-1.00168	92.5911	-0.0735667
10.5043	120.342	12.6068	-1.00085	92.5888	-0.0735061
10.5127	120.432	12.6065	-1.00003	92.5863	-0.0734454
10.521	120.513	12.6062	-0.999231	92.5841	-0.0733869
10.5293	120.599	12.6058	-0.998446	92.5814	-0.0733292
10.5377	120.684	12.6054	-0.997657	92.5785	-0.0732713
10.546	120.766	12.605	-0.996834	92.5754	-0.0732108
10.5543	120.851	12.6046	-0.996047	92.5725	-0.073153
10.5627	120.93	12.6042	-0.995235	92.5695	-0.0730934
10.571	121.017	12.6038	-0.994447	92.5667	-0.0730355
10.5793	121.1	12.6034	-0.993647	92.5639	-0.0729767
10.5877	121.189	12.6031	-0.992864	92.5612	-0.0729193
10.596	121.271	12.6027	-0.992127	92.5585	-0.0728651
10.6043	121.358	12.6023	-0.991399	92.5556	-0.0728117
10.6127	121.441	12.602	-0.990632	92.5531	-0.0727553
10.621	121.52	12.6016	-0.989867	92.5507	-0.0726992
10.6293	121.606	12.6013	-0.989109	92.5483	-0.0726435
10.6377	121.69	12.601	-0.988345	92.5457	-0.0725873
10.646	121.774	12.6006	-0.987601	92.5429	-0.0725327
10.6543	121.86	12.6002	-0.986837	92.5401	-0.0724766
10.6627	121.942	12.5998	-0.986115	92.5374	-0.0724235
10.671	122.027	12.5995	-0.985383	92.5348	-0.0723698
10.6793	122.113	12.5991	-0.984629	92.5321	-0.0723144
10.6877	122.198	12.5988	-0.983864	92.5295	-0.0722582
10.696	122.281	12.5984	-0.983151	92.5269	-0.0722059
10.7043	122.366	12.5981	-0.982409	92.5244	-0.0721514
10.7127	122.452	12.5977	-0.981681	92.5219	-0.072098
10.721	122.532	12.5974	-0.980992	92.5193	-0.0720473
10.7293	122.619	12.5971	-0.980295	92.517	-0.0719962
10.7377	122.702	12.5968	-0.979614	92.5147	-0.0719461
10.746	122.79	12.5964	-0.978914	92.5122	-0.0718947
10.7543	122.87	12.596	-0.97824	92.5096	-0.0718452
10.7627	122.957	12.5957	-0.977551	92.5072	-0.0717946
10.771	123.039	12.5954	-0.976863	92.5045	-0.071744
10.7793	123.121	12.595	-0.976149	92.5019	-0.0716916
10.7877	123.209	12.5946	-0.975488	92.4991	-0.0716431
10.796	123.293	12.5943	-0.974835	92.4964	-0.0715951
10.8043	123.377	12.5939	-0.974118	92.4936	-0.0715424
10.8127	123.46	12.5935	-0.973391	92.4909	-0.071489
10.821	123.542	12.5931	-0.972658	92.4883	-0.0714352
10.8293	123.629	12.5928	-0.971918	92.4858	-0.0713809
10.8377	123.712	12.5925	-0.971197	92.4832	-0.0713279
10.846	123.797	12.5921	-0.970493	92.4804	-0.0712763
10.8543	123.881	12.5917	-0.969788	92.4779	-0.0712245
10.8627	123.971	12.5914	-0.969114	92.4751	-0.071175
10.871	124.046	12.591	-0.96841	92.4725	-0.0711233
10.8793	124.134	12.5906	-0.967697	92.4699	-0.0710709
10.8877	124.219	12.5903	-0.967026	92.4675	-0.0710216
10.896	124.306	12.59	-0.966353	92.4649	-0.0709722
10.9043	124.392	12.5896	-0.965706	92.4624	-0.0709246
10.9127	124.47	12.5893	-0.965065	92.4598	-0.0708776
10.921	124.555	12.5889	-0.964402	92.4571	-0.0708289
10.9293	124.634	12.5885	-0.963727	92.4544	-0.0707793
10.9377	124.721	12.5882	-0.963055	92.4519	-0.07073
10.946	124.805	12.5878	-0.962361	92.4494	-0.070679
10.9543	124.889	12.5875	-0.961713	92.447	-0.0706314
10.9627	124.971	12.5872	-0.96108	92.4447	-0.0705849
10.971	125.054	12.5869	-0.960408	92.4422	-0.0705355
10.9793	125.142	12.5866	-0.959775	92.4399	-0.070489
10.9877	125.223	12.5862	-0.959128	92.4374	-0.0704415
10.996	125.307	12.5859	-0.958469	92.435	-0.0703931
11.0043	125.398	12.5856	-0.957787	92.4327	-0.0703431
11.0127	125.477	12.5853	-0.957142	92.4304	-0.0702957
11.021	125.561	12.5849	-0.956492	92.428	-0.0702479
11.0293	125.646	12.5846	-0.955847	92.4253	-0.0702006
11.0377	125.723	12.5842	-0.955191	92.4226	-0.0701524
11.046	125.811	12.5838	-0.954532	92.42	-0.070104
11.0543	125.895	12.5835	-0.953924	92.4173	-0.0700594
11.0627	125.983	12.5831	-0.95329	92.4148	-0.0700128
11.071	126.069	12.5828	-0.952642	92.4123	-0.0699652
11.0793	126.149	12.5824	-0.952024	92.4096	-0.0699198
11.0877	126.232	12.5821	-0.951429	92.407	-0.0698761
11.096	126.315	12.5817	-0.950819	92.4046	-0.0698313
11.1043	126.401	12.5814	-0.950239	92.4021	-0.0697887
11.1127	126.49	12.5811	-0.949634	92.3998	-0.0697443
11.121	126.568	12.5808	-0.949047	92.3972	-0.0697012
11.1293	126.652	12.5804	-0.948433	92.3946	-0.0696561
11.1377	126.737	12.5801	-0.9478	92.3924	-0.0696096
11.146	126.822	12.5798	-0.947191	92.39	-0.0695649
11.1543	126.904	12.5794	-0.946621	92.3876	-0.069523
11.1627	126.99	12.5791	-0.946008	92.3853	-0.069478
11.171	127.074	12.5788	-0.945385	92.3828	-0.0694322
11.1793	127.154	12.5784	-0.944744	92.38	-0.0693851
11.1877	127.244	12.5781	-0.944103	92.3775	-0.0693381
11.196	127.329	12.5777	-0.943488	92.375	-0.0692929
11.2043	127.411	12.5774	-0.942865	92.3727	-0.0692471
11.2127	127.496	12.5771	-0.942268	92.3705	-0.0692033
11.221	127.58	12.5768	-0.941673	92.368	-0.0691596
11.2293	127.664	12.5764	-0.941034	92.3654	-0.0691127
11.2377	127.746	12.5761	-0.940351	92.363	-0.0690625
11.246	127.828	12.5757	-0.939727	92.3605	-0.0690167
11.2543	127.916	12.5754	-0.939127	92.3581	-0.0689726
11.2627	127.997	12.5751	-0.938552	92.3557	-0.0689304
11.271	128.083	12.5748	-0.937955	92.3535	-0.0688865
11.2793	128.17	12.5745	-0.937348	92.351	-0.0688419
11.2877	128.257	12.5741	-0.936722	92.3485	-0.068796
11.296	128.337	12.5738	-0.936114	92.346	-0.0687513
11.3043	128.419	12.5734	-0.935515	92.3435	-0.0687073
11.3127	128.503	12.5731	-0.934946	92.3411	-0.0686655
11.321	128.585	12.5727	-0.934424	92.3385	-0.0686272
11.3293	128.669	12.5724	-0.93385	92.336	-0.068585
11.3377	128.753	12.5721	-0.933275	92.3339	-0.0685428
11.346	128.841	12.5718	-0.932689	92.3318	-0.0684998
11.3543	128.921	12.5715	-0.932099	92.3293	-0.0684565
11.3627	129.007	12.5712	-0.931548	92.327	-0.068416
11.371	129.092	12.5709	-0.930984	92.325	-0.0683746
11.3793	129.175	12.5706	-0.930416	92.3227	-0.0683328
11.3877	129.26	12.5703	-0.929844	92.3205	-0.0682908
11.396	129.342	12.57	-0.929234	92.3183	-0.0682461
11.4043	129.428	12.5697	-0.928637	92.3162	-0.0682022
11.4127	129.513	12.5694	-0.92805	92.314	-0.0681591
11.421	129.599	12.5691	-0.927478	92.3116	-0.0681171
11.4293	129.677	12.5688	-0.926902	92.3092	-0.0680748
11.4377	129.762	12.5685	-0.926326	92.307	-0.0680324
11.446	129.847	12.5681	-0.925736	92.3046	-0.0679892
11.4543	129.926	12.5678	-0.925152	92.3023	-0.0679463
11.4627	130.014	12.5675	-0.92455	92.2999	-0.067902
11.471	130.098	12.5672	-0.923959	92.2975	-0.0678586
11.4793	130.182	12.5669	-0.923411	92.2952	-0.0678184
11.4877	130.267	12.5666	-0.922808	92.2931	-0.0677741
11.496	130.344	12.5663	-0.922229	92.2908	-0.0677316
11.5043	130.428	12.566	-0.921634	92.2886	-0.0676879
11.5127	130.515	12.5657	-0.921057	92.2864	-0.0676455
11.521	130.596	12.5653	-0.920499	92.284	-0.0676045
11.5293	130.684	12.565	-0.919917	92.2818	-0.0675618
11.5377	130.769	12.5647	-0.919368	92.2795	-0.0675215
11.546	130.854	12.5644	-0.918806	92.2771	-0.0674802
11.5543	130.935	12.5641	-0.918225	92.2748	-0.0674375
11.5627	131.018	12.5638	-0.917648	92.2724	-0.0673951
11.571	131.102	12.5634	-0.91711	92.2701	-0.0673556
11.5793	131.189	12.5631	-0.91655	92.2679	-0.0673145
11.5877	131.272	12.5628	-0.916	92.2655	-0.0672741
11.596	131.354	12.5625	-0.915414	92.2631	-0.0672311
11.6043	131.438	12.5622	-0.914831	92.2609	-0.0671882
11.6127	131.523	12.5619	-0.914283	92.2587	-0.067148
11.621	131.606	12.5616	-0.913719	92.2564	-0.0671065
11.6293	131.695	12.5613	-0.913153	92.2542	-0.067065
11.6377	131.777	12.561	-0.912613	92.2519	-0.0670254
11.646	131.857	12.5607	-0.912094	92.2497	-0.0669872
11.6543	131.943	12.5604	-0.911547	92.2475	-0.0669471
11.6627	132.028	12.5601	-0.911015	92.2452	-0.066908
11.671	132.11	12.5598	-0.910471	92.2431	-0.066868
11.6793	132.194	12.5595	-0.90991	92.2409	-0.0668268
11.6877	132.279	12.5592	-0.90936	92.2388	-0.0667864
11.696	132.364	12.5589	-0.908775	92.2366	-0.0667434
11.7043	132.446	12.5586	-0.908201	92.2344	-0.0667013
11.7127	132.533	12.5583	-0.907651	92.2324	-0.0666609
11.721	132.619	12.558	-0.90707	92.2304	-0.0666183
11.7293	132.698	12.5577	-0.906494	92.2282	-0.0665759
11.7377	132.785	12.5574	-0.905916	92.2259	-0.0665335
11.746	132.866	12.5571	-0.905344	92.2237	-0.0664915
11.7543	132.953	12.5568	-0.904767	92.2215	-0.0664491
11.7627	133.037	12.5565	-0.904241	92.2193	-0.0664105
11.771	133.121	12.5562	-0.903671	92.2171	-0.0663686
11.7793	133.203	12.5559	-0.903129	92.2149	-0.0663288
11.7877	133.284	12.5557	-0.902572	92.213	-0.0662879
11.796	133.368	12.5554	-0.902001	92.2107	-0.066246
11.8043	133.453	12.5551	-0.901479	92.2086	-0.0662077
11.8127	133.537	12.5548	-0.900934	92.2066	-0.0661676
11.821	133.624	12.5545	-0.90038	92.2046	-0.0661269
11.8293	133.705	12.5542	-0.899822	92.2024	-0.066086
11.8377	133.793	12.5539	-0.899268	92.2001	-0.0660452
11.846	133.876	12.5536	-0.89871	92.198	-0.0660043
11.8543	133.958	12.5534	-0.898195	92.1961	-0.0659664
11.8627	134.037	12.5531	-0.897673	92.1938	-0.0659281
11.871	134.124	12.5527	-0.897156	92.1916	-0.0658901
11.8793	134.213	12.5525	-0.896649	92.1894	-0.0658529
11.8877	134.294	12.5521	-0.89613	92.1872	-0.0658148
11.896	134.378	12.5519	-0.89561	92.185	-0.0657766
11.9043	134.463	12.5516	-0.895094	92.1828	-0.0657387
11.9127	134.545	12.5513	-0.894581	92.1808	-0.065701
11.921	134.63	12.551	-0.894043	92.1788	-0.0656615
11.9293	134.713	12.5507	-0.893521	92.1767	-0.0656232
11.9377	134.794	12.5504	-0.892977	92.1745	-0.0655832
11.946	134.878	12.5502	-0.892442	92.1726	-0.0655439
11.9543	134.965	12.5499	-0.891922	92.1706	-0.0655057
11.9627	135.05	12.5496	-0.891382	92.1684	-0.0654661
11.971	135.129	12.5493	-0.890841	92.1665	-0.0654264
11.9793	135.216	12.5491	-0.890284	92.1645	-0.0653854
11.9877	135.304	12.5488	-0.889763	92.1623	-0.0653472
11.996	135.382	12.5485	-0.889248	92.1603	-0.0653093
12.0043	135.465	12.5482	-0.888741	92.1583	-0.0652721
12.0127	135.551	12.5479	-0.88824	92.1562	-0.0652353
12.021	135.636	12.5476	-0.887746	92.1539	-0.065199
12.0293	135.721	12.5473	-0.887244	92.1517	-0.0651622
12.0377	135.802	12.547	-0.886731	92.1496	-0.0651244
12.046	135.89	12.5467	-0.886258	92.1475	-0.0650897
12.0543	135.975	12.5464	-0.885768	92.1452	-0.0650537
12.0627	136.054	12.5461	-0.885271	92.143	-0.0650173
12.071	136.137	12.5459	-0.884778	92.141	-0.064981
12.0793	136.226	12.5456	-0.884257	92.1389	-0.0649428
12.0877	136.311	12.5453	-0.883769	92.1368	-0.0649069
12.096	136.392	12.545	-0.88323	92.1348	-0.0648674
12.1043	136.478	12.5448	-0.882706	92.133	-0.0648289
12.1127	136.558	12.5445	-0.882162	92.1311	-0.0647889
12.121	136.641	12.5442	-0.881657	92.1291	-0.0647518
12.1293	136.725	12.544	-0.881148	92.1272	-0.0647144
12.1377	136.811	12.5437	-0.88062	92.125	-0.0646756
12.146	136.894	12.5434	-0.880114	92.123	-0.0646385
12.1543	136.981	12.5432	-0.879598	92.1212	-0.0646006
12.1627	137.061	12.5429	-0.879099	92.1193	-0.0645639
12.171	137.147	12.5427	-0.878597	92.1174	-0.0645271
12.1793	137.232	12.5424	-0.878126	92.1154	-0.0644925
12.1877	137.312	12.5421	-0.877649	92.1134	-0.0644575
12.196	137.403	12.5418	-0.877181	92.1114	-0.0644231
12.2043	137.479	12.5416	-0.876673	92.1096	-0.0643858
12.2127	137.565	12.5413	-0.876174	92.1078	-0.0643491
12.221	137.647	12.5411	-0.875673	92.1061	-0.0643123
12.2293	137.734	12.5409	-0.87517	92.1044	-0.0642754
12.2377	137.815	12.5406	-0.874655	92.1023	-0.0642376
12.246	137.903	12.5403	-0.874152	92.1003	-0.0642006
12.2543	137.983	12.5401	-0.87367	92.0985	-0.0641652
12.2627	138.067	12.5398	-0.873211	92.0964	-0.0641315
12.271	138.153	12.5395	-0.872737	92.0943	-0.0640967
12.2793	138.236	12.5392	-0.87226	92.0924	-0.0640617
12.2877	138.323	12.539	-0.871764	92.0903	-0.0640253
12.296	138.404	12.5387	-0.871268	92.0882	-0.0639888
12.3043	138.488	12.5384	-0.870814	92.0863	-0.0639555
12.3127	138.57	12.5381	-0.870331	92.0843	-0.06392
12.321	138.652	12.5379	-0.869841	92.0823	-0.063884
12.3293	138.742	12.5376	-0.869376	92.0805	-0.0638498
12.3377	138.825	12.5373	-0.868888	92.0785	-0.063814
12.346	138.909	12.5371	-0.868386	92.0767	-0.0637771
12.3543	138.991	12.5369	-0.867903	92.0749	-0.0637417
12.3627	139.076	12.5366	-0.867413	92.073	-0.0637057
12.371	139.157	12.5364	-0.866925	92.0712	-0.0636699
12.3793	139.245	12.5361	-0.86644	92.0694	-0.0636342
12.3877	139.327	12.5358	-0.865958	92.0675	-0.0635988
12.396	139.414	12.5356	-0.865484	92.0655	-0.063564
12.4043	139.494	12.5353	-0.865056	92.0636	-0.0635326
12.4127	139.575	12.5351	-0.864587	92.0617	-0.0634981
12.421	139.668	12.5348	-0.864072	92.0595	-0.0634604
12.4293	139.749	12.5345	-0.863583	92.0575	-0.0634244
12.4377	139.833	12.5342	-0.863107	92.0556	-0.0633894
12.446	139.913	12.534	-0.862665	92.0536	-0.063357
12.4543	139.996	12.5337	-0.862234	92.0517	-0.0633253
12.4627	140.082	12.5334	-0.861771	92.0498	-0.0632913
12.471	140.162	12.5332	-0.861305	92.0478	-0.0632571
12.4793	140.246	12.5329	-0.860861	92.0458	-0.0632245
12.4877	140.336	12.5327	-0.860408	92.044	-0.0631912
12.496	140.411	12.5324	-0.859974	92.042	-0.0631593
12.5043	140.495	12.5321	-0.859568	92.0402	-0.0631295
12.5127	140.58	12.5319	-0.859126	92.0384	-0.0630971
12.521	140.667	12.5317	-0.85869	92.0367	-0.0630651
12.5293	140.755	12.5314	-0.858251	92.0346	-0.0630328
12.5377	140.833	12.5311	-0.857791	92.0327	-0.062999
12.546	140.917	12.5309	-0.857348	92.0308	-0.0629665
12.5543	141.001	12.5306	-0.856889	92.029	-0.0629328
12.5627	141.087	12.5304	-0.856459	92.0273	-0.0629012
12.571	141.172	12.5301	-0.856051	92.0254	-0.0628712
12.5793	141.255	12.5299	-0.855634	92.0236	-0.0628406
12.5877	141.339	12.5296	-0.855193	92.0219	-0.0628083
12.596	141.422	12.5294	-0.854767	92.0201	-0.062777
12.6043	141.507	12.5291	-0.85433	92.0183	-0.0627449
12.6127	141.593	12.5289	-0.853848	92.0166	-0.0627094
12.621	141.681	12.5287	-0.853406	92.0148	-0.062677
12.6293	141.759	12.5284	-0.852973	92.013	-0.0626452
12.6377	141.843	12.5282	-0.852548	92.0112	-0.062614
12.646	141.925	12.5279	-0.85213	92.0094	-0.0625833
12.6543	142.01	12.5277	-0.851656	92.0075	-0.0625484
12.6627	142.096	12.5274	-0.851178	92.0057	-0.0625133
12.671	142.182	12.5272	-0.850756	92.0038	-0.0624823
12.6793	142.264	12.5269	-0.850318	92.002	-0.0624502
12.6877	142.348	12.5267	-0.849885	92.0003	-0.0624184
12.696	142.431	12.5264	-0.84948	91.9983	-0.0623887
12.7043	142.51	12.5262	-0.849065	91.9964	-0.0623582
12.7127	142.6	12.5259	-0.848666	91.9947	-0.0623288
12.721	142.678	12.5257	-0.848265	91.993	-0.0622994
12.7293	142.762	12.5254	-0.847835	91.9911	-0.0622678
12.7377	142.843	12.5252	-0.847432	91.9891	-0.0622382
12.746	142.932	12.5249	-0.847027	91.9873	-0.0622085
12.7543	143.013	12.5247	-0.846606	91.9854	-0.0621776
12.7627	143.098	12.5244	-0.846169	91.9832	-0.0621455
12.771	143.182	12.5241	-0.845742	91.9813	-0.0621141
12.7793	143.266	12.5239	-0.845318	91.9796	-0.062083
12.7877	143.352	12.5236	-0.844934	91.9779	-0.0620548
12.796	143.431	12.5234	-0.84452	91.9761	-0.0620244
12.8043	143.515	12.5232	-0.844141	91.9743	-0.0619965
12.8127	143.602	12.5229	-0.843725	91.9725	-0.061966
12.821	143.687	12.5227	-0.843315	91.9709	-0.0619359
12.8293	143.77	12.5225	-0.842924	91.9691	-0.0619071
12.8377	143.853	12.5222	-0.842514	91.9672	-0.061877
12.846	143.937	12.522	-0.842121	91.9657	-0.0618482
12.8543	144.019	12.5218	-0.841697	91.9639	-0.061817
12.8627	144.102	12.5215	-0.841324	91.9621	-0.0617896
12.871	144.185	12.5213	-0.840915	91.9602	-0.0617596
12.8793	144.269	12.521	-0.840499	91.9584	-0.061729
12.8877	144.347	12.5207	-0.840053	91.9566	-0.0616963
12.896	144.436	12.5205	-0.839661	91.9549	-0.0616675
12.9043	144.516	12.5203	-0.83925	91.9531	-0.0616373
12.9127	144.604	12.52	-0.838826	91.9514	-0.0616062
12.921	144.69	12.5198	-0.838415	91.9499	-0.061576
12.9293	144.769	12.5197	-0.838029	91.9486	-0.0615476
12.9377	144.852	12.5195	-0.837656	91.947	-0.0615203
12.946	144.934	12.5192	-0.837224	91.9452	-0.0614885
12.9543	145.025	12.519	-0.836794	91.9437	-0.0614569
12.9627	145.106	12.5188	-0.836387	91.9419	-0.061427
12.971	145.188	12.5185	-0.835969	91.9402	-0.0613964
12.9793	145.272	12.5183	-0.835545	91.9385	-0.0613652
12.9877	145.356	12.5181	-0.835126	91.9367	-0.0613344
12.996	145.441	12.5178	-0.834741	91.9347	-0.0613062
13.0043	145.522	12.5175	-0.834344	91.9331	-0.061277
13.0127	145.611	12.5173	-0.833951	91.931	-0.0612481
13.021	145.694	12.517	-0.833573	91.9293	-0.0612204
13.0293	145.776	12.5168	-0.833214	91.9276	-0.061194
13.0377	145.858	12.5166	-0.832828	91.9257	-0.0611657
13.046	145.942	12.5163	-0.832421	91.924	-0.0611358
13.0543	146.03	12.5161	-0.832052	91.9224	-0.0611087
13.0627	146.111	12.5159	-0.83167	91.9206	-0.0610806
13.071	146.197	12.5157	-0.8313	91.9192	-0.0610534
13.0793	146.28	12.5154	-0.830875	91.9176	-0.0610222
13.0877	146.367	12.5152	-0.830462	91.9162	-0.0609919
13.096	146.45	12.515	-0.830002	91.9146	-0.0609581
13.1043	146.532	12.5148	-0.829568	91.9128	-0.0609262
13.1127	146.613	12.5146	-0.829174	91.9111	-0.0608973
13.121	146.698	12.5143	-0.8288	91.9094	-0.0608698
13.1293	146.785	12.5141	-0.828415	91.9078	-0.0608416
13.1377	146.872	12.5138	-0.828015	91.9058	-0.0608122
13.146	146.955	12.5136	-0.827635	91.904	-0.0607843
13.1543	147.036	12.5133	-0.827248	91.9021	-0.0607558
13.1627	147.119	12.5131	-0.826878	91.9005	-0.0607286
13.171	147.203	12.5129	-0.826531	91.8986	-0.0607032
13.1793	147.287	12.5126	-0.826235	91.897	-0.0606814
13.1877	147.371	12.5124	-0.825891	91.8953	-0.0606562
13.196	147.451	12.5122	-0.825508	91.8935	-0.0606281
13.2043	147.538	12.512	-0.825135	91.892	-0.0606007
13.2127	147.623	12.5117	-0.824775	91.8905	-0.0605742
13.221	147.707	12.5115	-0.824431	91.8888	-0.060549
13.2293	147.788	12.5113	-0.824065	91.8874	-0.0605221
13.2377	147.877	12.5111	-0.823699	91.8857	-0.0604952
13.246	147.959	12.5109	-0.823326	91.884	-0.0604678
13.2543	148.041	12.5107	-0.822958	91.8825	-0.0604408
13.2627	148.124	12.5104	-0.822545	91.8808	-0.0604105
13.271	148.209	12.5102	-0.822147	91.8789	-0.0603812
13.2793	148.292	12.51	-0.821735	91.8775	-0.0603509
13.2877	148.376	12.5098	-0.821342	91.8758	-0.0603221
13.296	148.463	12.5095	-0.820975	91.8741	-0.0602951
13.3043	148.545	12.5093	-0.82056	91.8727	-0.0602647
13.3127	148.627	12.5091	-0.820144	91.871	-0.0602341
13.321	148.711	12.5089	-0.819765	91.8695	-0.0602063
13.3293	148.796	12.5086	-0.81942	91.8676	-0.0601809
13.3377	148.881	12.5084	-0.819044	91.8658	-0.0601534
13.346	148.963	12.5082	-0.818691	91.8641	-0.0601274
13.3543	149.042	12.508	-0.818321	91.8627	-0.0601002
13.3627	149.13	12.5077	-0.817964	91.8611	-0.060074
13.371	149.213	12.5075	-0.817581	91.8595	-0.0600459
13.3793	149.298	12.5074	-0.817215	91.8581	-0.060019
13.3877	149.38	12.5071	-0.816853	91.8566	-0.0599924
13.396	149.466	12.5069	-0.816528	91.855	-0.0599685
13.4043	149.552	12.5067	-0.816165	91.8532	-0.0599419
13.4127	149.63	12.5064	-0.815798	91.8515	-0.0599149
13.421	149.718	12.5062	-0.815402	91.85	-0.0598858
13.4293	149.8	12.506	-0.815037	91.8484	-0.059859
13.4377	149.88	12.5058	-0.814675	91.8466	-0.0598325
13.446	149.967	12.5055	-0.814308	91.8449	-0.0598055
13.4543	150.054	12.5053	-0.813939	91.8433	-0.0597784
13.4627	150.135	12.5051	-0.81357	91.8416	-0.0597513
13.471	150.222	12.5049	-0.813227	91.84	-0.0597261
13.4793	150.301	12.5046	-0.81282	91.8382	-0.0596962
13.4877	150.387	12.5044	-0.812433	91.8366	-0.0596678
13.496	150.472	12.5042	-0.812063	91.8353	-0.0596406
13.5043	150.558	12.504	-0.811715	91.8338	-0.0596151
13.5127	150.638	12.5038	-0.811311	91.8323	-0.0595854
13.521	150.723	12.5036	-0.810923	91.8309	-0.0595569
13.5293	150.806	12.5034	-0.810588	91.8293	-0.0595323
13.5377	150.889	12.5032	-0.810269	91.8275	-0.0595089
13.546	150.975	12.503	-0.809907	91.8259	-0.0594822
13.5543	151.06	12.5028	-0.809553	91.8244	-0.0594562
13.5627	151.143	12.5026	-0.809241	91.823	-0.0594334
13.571	151.226	12.5024	-0.808893	91.8217	-0.0594078
13.5793	151.312	12.5022	-0.808539	91.82	-0.0593818
13.5877	151.392	12.5019	-0.808209	91.8183	-0.0593576
13.596	151.477	12.5017	-0.807897	91.8169	-0.0593346
13.6043	151.56	12.5015	-0.807584	91.8154	-0.0593117
13.6127	151.645	12.5013	-0.807255	91.8139	-0.0592875
13.621	151.728	12.5011	-0.80691	91.8125	-0.0592622
13.6293	151.815	12.5009	-0.806567	91.8109	-0.059237
13.6377	151.901	12.5007	-0.806199	91.8092	-0.0592099
13.646	151.984	12.5005	-0.805828	91.8075	-0.0591827
13.6543	152.065	12.5002	-0.805473	91.8058	-0.0591567
13.6627	152.149	12.5	-0.805111	91.8042	-0.05913
13.671	152.232	12.4998	-0.804714	91.8028	-0.0591009
13.6793	152.316	12.4996	-0.804337	91.8012	-0.0590732
13.6877	152.402	12.4994	-0.80396	91.7996	-0.0590455
13.696	152.484	12.4992	-0.803573	91.7981	-0.0590171
13.7043	152.571	12.499	-0.803197	91.7966	-0.0589895
13.7127	152.652	12.4987	-0.802837	91.795	-0.058963
13.721	152.736	12.4985	-0.802487	91.7935	-0.0589373
13.7293	152.823	12.4984	-0.802137	91.792	-0.0589116
13.7377	152.904	12.4981	-0.801798	91.7905	-0.0588867
13.746	152.986	12.4979	-0.80143	91.7889	-0.0588597
13.7543	153.072	12.4977	-0.801097	91.7873	-0.0588352
13.7627	153.152	12.4975	-0.800771	91.7857	-0.0588113
13.771	153.239	12.4973	-0.800441	91.7841	-0.0587871
13.7793	153.32	12.497	-0.800101	91.7824	-0.0587621
13.7877	153.404	12.4968	-0.799735	91.7809	-0.0587352
13.796	153.49	12.4966	-0.799371	91.7795	-0.0587084
13.8043	153.574	12.4964	-0.799047	91.778	-0.0586847
13.8127	153.657	12.4963	-0.798716	91.7767	-0.0586604
13.821	153.736	12.4961	-0.798357	91.7752	-0.058634
13.8293	153.824	12.4959	-0.797998	91.7737	-0.0586076
13.8377	153.908	12.4956	-0.797684	91.7721	-0.0585845
13.846	153.989	12.4955	-0.797342	91.7708	-0.0585594
13.8543	154.076	12.4952	-0.79698	91.7692	-0.0585328
13.8627	154.158	12.495	-0.796619	91.7677	-0.0585063
13.871	154.238	12.4948	-0.796304	91.7661	-0.0584832
13.8793	154.323	12.4946	-0.795987	91.7647	-0.0584599
13.8877	154.411	12.4944	-0.79563	91.7631	-0.0584337
13.896	154.497	12.4942	-0.795278	91.7615	-0.0584079
13.9043	154.577	12.494	-0.79497	91.76	-0.0583852
13.9127	154.662	12.4938	-0.794684	91.7584	-0.0583643
13.921	154.743	12.4936	-0.794341	91.7569	-0.0583391
13.9293	154.825	12.4934	-0.794033	91.7554	-0.0583164
13.9377	154.91	12.4932	-0.793743	91.7541	-0.0582951
13.946	154.998	12.493	-0.793449	91.7528	-0.0582736
13.9543	155.076	12.4928	-0.793117	91.7512	-0.0582492
13.9627	155.165	12.4926	-0.792794	91.7496	-0.0582254
13.971	155.244	12.4924	-0.792496	91.7481	-0.0582035
13.9793	155.327	12.4922	-0.792226	91.7467	-0.0581838
13.9877	155.414	12.492	-0.791903	91.7453	-0.05816
13.996	155.499	12.4918	-0.791562	91.7442	-0.058135
14.0043	155.581	12.4916	-0.791226	91.7428	-0.0581103
14.0127	155.666	12.4914	-0.790884	91.7413	-0.0580852
14.021	155.749	12.4912	-0.790569	91.7398	-0.058062
14.0293	155.834	12.491	-0.790234	91.7384	-0.0580374
14.0377	155.917	12.4909	-0.789927	91.7371	-0.0580149
14.046	156.001	12.4907	-0.789611	91.7356	-0.0579917
14.0543	156.081	12.4904	-0.789269	91.734	-0.0579665
14.0627	156.168	12.4902	-0.788921	91.7326	-0.057941
14.071	156.251	12.49	-0.78862	91.7309	-0.0579188
14.0793	156.333	12.4898	-0.788309	91.7293	-0.057896
14.0877	156.417	12.4896	-0.788005	91.7278	-0.0578737
14.096	156.504	12.4894	-0.787678	91.7263	-0.0578497
14.1043	156.582	12.4892	-0.787331	91.7249	-0.0578242
14.1127	156.671	12.489	-0.787029	91.7233	-0.0578021
14.121	156.753	12.4888	-0.786729	91.7216	-0.05778
14.1293	156.834	12.4885	-0.786423	91.72	-0.0577576
14.1377	156.918	12.4884	-0.786114	91.7187	-0.0577348
14.146	157.007	12.4882	-0.785776	91.7174	-0.05771
14.1543	157.089	12.488	-0.785427	91.716	-0.0576844
14.1627	157.173	12.4878	-0.785111	91.7145	-0.0576611
14.171	157.254	12.4876	-0.784799	91.7129	-0.0576383
14.1793	157.342	12.4874	-0.784507	91.7116	-0.0576168
14.1877	157.422	12.4872	-0.784212	91.7102	-0.0575951
14.196	157.511	12.487	-0.783915	91.7088	-0.0575734
14.2043	157.593	12.4869	-0.78361	91.7077	-0.057551
14.2127	157.681	12.4867	-0.783286	91.7064	-0.0575271
14.221	157.757	12.4865	-0.782958	91.705	-0.0575031
14.2293	157.85	12.4863	-0.782666	91.7037	-0.0574816
14.2377	157.929	12.4861	-0.782369	91.7023	-0.0574598
14.246	158.016	12.486	-0.78206	91.7012	-0.0574371
14.2543	158.096	12.4858	-0.781762	91.7	-0.0574152
14.2627	158.184	12.4857	-0.781433	91.6988	-0.057391
14.271	158.26	12.4855	-0.781112	91.6976	-0.0573675
14.2793	158.348	12.4853	-0.780784	91.6961	-0.0573433
14.2877	158.435	12.4851	-0.780462	91.6947	-0.0573197
14.296	158.518	12.4849	-0.780139	91.6931	-0.057296
14.3043	158.6	12.4847	-0.779823	91.6918	-0.0572728
14.3127	158.685	12.4845	-0.779493	91.6901	-0.0572485
14.321	158.766	12.4843	-0.779166	91.6886	-0.0572245
14.3293	158.85	12.4841	-0.778875	91.6871	-0.0572031
14.3377	158.937	12.4839	-0.77857	91.6856	-0.0571808
14.346	159.023	12.4836	-0.778287	91.6839	-0.05716
14.3543	159.106	12.4834	-0.777987	91.6825	-0.057138
14.3627	159.188	12.4832	-0.777678	91.6811	-0.0571153
14.371	159.27	12.4831	-0.777358	91.6798	-0.0570918
14.3793	159.353	12.4829	-0.777058	91.6787	-0.0570697
14.3877	159.439	12.4827	-0.776759	91.6773	-0.0570478
14.396	159.524	12.4825	-0.776478	91.6759	-0.0570271
14.4043	159.607	12.4824	-0.776211	91.6745	-0.0570075
14.4127	159.69	12.4822	-0.77592	91.6731	-0.0569862
14.421	159.777	12.482	-0.775616	91.6717	-0.0569638
14.4293	159.858	12.4818	-0.775311	91.6703	-0.0569414
14.4377	159.943	12.4816	-0.775024	91.6689	-0.0569204
14.446	160.025	12.4814	-0.774738	91.6674	-0.0568994
14.4543	160.107	12.4812	-0.77444	91.666	-0.0568774
14.4627	160.192	12.481	-0.774161	91.6645	-0.056857
14.471	160.275	12.4808	-0.773894	91.6632	-0.0568374
14.4793	160.356	12.4806	-0.773613	91.662	-0.0568167
14.4877	160.439	12.4804	-0.773312	91.6606	-0.0567946
14.496	160.529	12.4803	-0.773021	91.6593	-0.0567733
14.5043	160.607	12.4801	-0.772739	91.6578	-0.0567525
14.5127	160.694	12.4799	-0.772461	91.6565	-0.0567321
14.521	160.777	12.4797	-0.77216	91.6551	-0.05671
14.5293	160.863	12.4795	-0.771846	91.6538	-0.0566869
14.5377	160.945	12.4793	-0.771579	91.6524	-0.0566674
14.546	161.021	12.4792	-0.771292	91.6513	-0.0566462
14.5543	161.11	12.479	-0.771008	91.6501	-0.0566254
14.5627	161.194	12.4788	-0.770736	91.6488	-0.0566054
14.571	161.277	12.4787	-0.770445	91.6475	-0.056584
14.5793	161.365	12.4785	-0.770172	91.6463	-0.056564
14.5877	161.447	12.4783	-0.769912	91.6451	-0.0565449
14.596	161.53	12.4782	-0.769626	91.6438	-0.0565239
14.6043	161.615	12.478	-0.769361	91.6425	-0.0565044
14.6127	161.701	12.4778	-0.769104	91.6413	-0.0564856
14.621	161.782	12.4777	-0.768808	91.6402	-0.0564639
14.6293	161.865	12.4775	-0.768551	91.6389	-0.056445
14.6377	161.953	12.4773	-0.768284	91.6375	-0.0564253
14.646	162.036	12.4771	-0.767983	91.6361	-0.0564032
14.6543	162.121	12.4769	-0.767693	91.6348	-0.0563819
14.6627	162.202	12.4768	-0.76739	91.6336	-0.0563597
14.671	162.284	12.4766	-0.767074	91.6323	-0.0563365
14.6793	162.37	12.4764	-0.766819	91.6308	-0.0563177
14.6877	162.449	12.4762	-0.766558	91.6294	-0.0562986
14.696	162.532	12.476	-0.76629	91.6279	-0.0562789
14.7043	162.623	12.4758	-0.766039	91.6263	-0.0562604
14.7127	162.705	12.4756	-0.765756	91.6248	-0.0562397
14.721	162.789	12.4754	-0.765453	91.6233	-0.0562174
14.7293	162.871	12.4752	-0.765163	91.622	-0.0561961
14.7377	162.955	12.475	-0.764918	91.6206	-0.0561781
14.746	163.037	12.4748	-0.764667	91.6191	-0.0561597
14.7543	163.12	12.4746	-0.764427	91.6176	-0.0561421
14.7627	163.206	12.4744	-0.764142	91.6165	-0.0561211
14.771	163.287	12.4743	-0.763841	91.6151	-0.0560991
14.7793	163.373	12.4741	-0.763573	91.6137	-0.0560793
14.7877	163.453	12.4739	-0.763308	91.6125	-0.0560599
14.796	163.539	12.4737	-0.763034	91.6113	-0.0560398
14.8043	163.622	12.4736	-0.762771	91.6102	-0.0560204
14.8127	163.707	12.4734	-0.762531	91.6091	-0.0560028
14.821	163.788	12.4733	-0.762277	91.6079	-0.0559841
14.8293	163.875	12.4731	-0.761991	91.6066	-0.0559631
14.8377	163.958	12.4729	-0.761697	91.6054	-0.0559416
14.846	164.037	12.4727	-0.761433	91.604	-0.0559222
14.8543	164.124	12.4726	-0.761179	91.6029	-0.0559035
14.8627	164.207	12.4724	-0.760912	91.6017	-0.0558839
14.871	164.288	12.4723	-0.760607	91.6004	-0.0558615
14.8793	164.373	12.4721	-0.760337	91.5991	-0.0558417
14.8877	164.455	12.4719	-0.760074	91.5978	-0.0558224
14.896	164.538	12.4717	-0.7598	91.5964	-0.0558022
14.9043	164.624	12.4715	-0.759501	91.5951	-0.0557803
14.9127	164.709	12.4714	-0.759239	91.5939	-0.055761
14.921	164.79	12.4712	-0.758991	91.5928	-0.0557428
14.9293	164.873	12.4711	-0.758709	91.5918	-0.0557221
14.9377	164.958	12.4709	-0.758427	91.5904	-0.0557014
14.946	165.037	12.4707	-0.758147	91.5891	-0.0556809
14.9543	165.125	12.4705	-0.757917	91.5879	-0.055664
14.9627	165.207	12.4703	-0.757646	91.5864	-0.055644
14.971	165.295	12.4702	-0.757382	91.5851	-0.0556247
14.9793	165.378	12.47	-0.757127	91.5838	-0.0556059
14.9877	165.46	12.4698	-0.756875	91.5827	-0.0555874
14.996	165.54	12.4697	-0.756617	91.5814	-0.0555684
15.0043	165.628	12.4695	-0.756354	91.5799	-0.0555491
15.0127	165.714	12.4693	-0.756127	91.5786	-0.0555325
15.021	165.8	12.4691	-0.755874	91.5773	-0.0555139
15.0293	165.878	12.4689	-0.755612	91.576	-0.0554947
15.0377	165.96	12.4688	-0.755332	91.5749	-0.0554741
15.046	166.044	12.4686	-0.755094	91.5737	-0.0554566
15.0543	166.129	12.4685	-0.754845	91.5725	-0.0554383
15.0627	166.21	12.4683	-0.754573	91.5713	-0.0554183
15.071	166.297	12.4681	-0.75433	91.57	-0.0554005
15.0793	166.38	12.468	-0.754074	91.5688	-0.0553817
15.0877	166.465	12.4678	-0.753805	91.5675	-0.055362
15.096	166.545	12.4676	-0.753504	91.5661	-0.0553398
15.1043	166.629	12.4674	-0.753244	91.5648	-0.0553208
15.1127	166.716	12.4672	-0.752973	91.5636	-0.0553009
15.121	166.8	12.4671	-0.752712	91.5622	-0.0552816
15.1293	166.882	12.4669	-0.752449	91.5611	-0.0552624
15.1377	166.959	12.4667	-0.75221	91.5597	-0.0552448
15.146	167.049	12.4665	-0.751958	91.5584	-0.0552263
15.1543	167.129	12.4664	-0.751672	91.557	-0.0552053
15.1627	167.211	12.4662	-0.751386	91.5559	-0.0551843
15.171	167.299	12.466	-0.751102	91.5548	-0.0551634
15.1793	167.379	12.4659	-0.750861	91.5537	-0.0551457
15.1877	167.466	12.4657	-0.750608	91.5525	-0.0551272
15.196	167.547	12.4656	-0.750364	91.5514	-0.0551092
15.2043	167.628	12.4654	-0.750136	91.5501	-0.0550925
15.2127	167.712	12.4652	-0.749871	91.5488	-0.055073
15.221	167.799	12.465	-0.749585	91.5475	-0.055052
15.2293	167.881	12.4649	-0.749318	91.5462	-0.0550324
15.2377	167.965	12.4647	-0.749086	91.5451	-0.0550154
15.246	168.052	12.4645	-0.748874	91.5436	-0.0549998
15.2543	168.134	12.4643	-0.748655	91.5423	-0.0549837
15.2627	168.219	12.4642	-0.748394	91.5412	-0.0549645
15.271	168.298	12.4641	-0.748133	91.5401	-0.0549454
15.2793	168.382	12.4639	-0.747923	91.539	-0.05493
15.2877	168.464	12.4637	-0.747674	91.5379	-0.0549117
15.296	168.554	12.4636	-0.747437	91.537	-0.0548942
15.3043	168.632	12.4635	-0.747202	91.5359	-0.054877
15.3127	168.719	12.4633	-0.747017	91.5348	-0.0548634
15.321	168.8	12.4632	-0.746789	91.5335	-0.0548467
15.3293	168.885	12.463	-0.746536	91.5325	-0.0548281
15.3377	168.97	12.4629	-0.746296	91.5314	-0.0548105
15.346	169.054	12.4627	-0.746056	91.5301	-0.0547928
15.3543	169.137	12.4625	-0.745835	91.5285	-0.0547766
15.3627	169.218	12.4623	-0.74556	91.527	-0.0547564
15.371	169.303	12.4621	-0.745313	91.5255	-0.0547383
15.3793	169.388	12.4619	-0.745082	91.5242	-0.0547213
15.3877	169.47	12.4617	-0.74484	91.5231	-0.0547035
15.396	169.556	12.4616	-0.744552	91.5219	-0.0546824
15.4043	169.636	12.4614	-0.744284	91.521	-0.0546627
15.4127	169.719	12.4613	-0.744056	91.5196	-0.054646
15.421	169.804	12.4611	-0.743826	91.5185	-0.0546291
15.4293	169.891	12.4609	-0.743604	91.5173	-0.0546128
15.4377	169.973	12.4608	-0.743376	91.5164	-0.054596
15.446	170.053	12.4607	-0.743184	91.5155	-0.0545819
15.4543	170.136	12.4605	-0.742958	91.5144	-0.0545653
15.4627	170.224	12.4604	-0.742739	91.513	-0.0545492
15.471	170.311	12.4602	-0.74251	91.5119	-0.0545324
15.4793	170.391	12.4601	-0.742304	91.5108	-0.0545173
15.4877	170.475	12.4599	-0.742094	91.5094	-0.0545019
15.496	170.555	12.4597	-0.741849	91.5083	-0.0544838
15.5043	170.637	12.4595	-0.741593	91.5069	-0.0544651
15.5127	170.726	12.4594	-0.74136	91.5058	-0.054448
15.521	170.807	12.4592	-0.741091	91.5044	-0.0544282
15.5293	170.891	12.459	-0.740818	91.5033	-0.0544081
15.5377	170.976	12.4589	-0.740573	91.502	-0.0543902
15.546	171.058	12.4587	-0.74033	91.5008	-0.0543723
15.5543	171.14	12.4585	-0.740078	91.4994	-0.0543538
15.5627	171.229	12.4583	-0.73983	91.498	-0.0543356
15.571	171.309	12.4581	-0.739575	91.4968	-0.0543169
15.5793	171.393	12.458	-0.739332	91.4956	-0.054299
15.5877	171.474	12.4579	-0.739121	91.4946	-0.0542835
15.596	171.559	12.4577	-0.738905	91.4934	-0.0542676
15.6043	171.643	12.4575	-0.738707	91.4922	-0.0542531
15.6127	171.727	12.4573	-0.738492	91.4907	-0.0542373
15.621	171.81	12.4572	-0.738261	91.4895	-0.0542203
15.6293	171.896	12.457	-0.738018	91.4883	-0.0542025
15.6377	171.978	12.4568	-0.737789	91.4872	-0.0541857
15.646	172.059	12.4567	-0.737526	91.4862	-0.0541663
15.6543	172.144	12.4565	-0.737274	91.4848	-0.0541478
15.6627	172.228	12.4564	-0.737026	91.4837	-0.0541296
15.671	172.311	12.4562	-0.736758	91.4823	-0.05411
15.6793	172.397	12.456	-0.736483	91.4812	-0.0540897
15.6877	172.48	12.4559	-0.736194	91.4801	-0.0540685
15.696	172.562	12.4558	-0.735941	91.4792	-0.05405
15.7043	172.649	12.4556	-0.735678	91.4781	-0.0540307
15.7127	172.73	12.4555	-0.735424	91.4771	-0.054012
15.721	172.814	12.4553	-0.735215	91.476	-0.0539966
15.7293	172.899	12.4552	-0.735022	91.4748	-0.0539825
15.7377	172.986	12.455	-0.734805	91.4738	-0.0539666
15.746	173.066	12.4549	-0.734568	91.4728	-0.0539491
15.7543	173.151	12.4547	-0.734334	91.4718	-0.0539319
15.7627	173.237	12.4546	-0.734119	91.4705	-0.0539162
15.771	173.323	12.4544	-0.73393	91.4694	-0.0539022
15.7793	173.404	12.4543	-0.733694	91.4683	-0.0538849
15.7877	173.483	12.4541	-0.73346	91.4671	-0.0538677
15.796	173.568	12.4539	-0.733213	91.4657	-0.0538496
15.8043	173.65	12.4538	-0.732951	91.4646	-0.0538303
15.8127	173.737	12.4536	-0.732699	91.4632	-0.0538119
15.821	173.822	12.4534	-0.732462	91.4619	-0.0537944
15.8293	173.904	12.4532	-0.732227	91.4606	-0.0537772
15.8377	173.985	12.453	-0.732	91.4593	-0.0537605
15.846	174.069	12.4529	-0.731754	91.4582	-0.0537425
15.8543	174.153	12.4527	-0.731514	91.457	-0.0537248
15.8627	174.239	12.4526	-0.731284	91.4558	-0.0537079
15.871	174.321	12.4524	-0.731073	91.4547	-0.0536924
15.8793	174.403	12.4523	-0.730878	91.4535	-0.0536781
15.8877	174.489	12.4521	-0.730686	91.4524	-0.053664
15.896	174.573	12.452	-0.730479	91.4513	-0.0536488
15.9043	174.653	12.4518	-0.730271	91.4505	-0.0536335
15.9127	174.739	12.4517	-0.730065	91.4495	-0.0536184
15.921	174.825	12.4516	-0.729821	91.4484	-0.0536005
15.9293	174.907	12.4514	-0.729605	91.4471	-0.0535846
15.9377	174.993	12.4512	-0.729397	91.4459	-0.0535693
15.946	175.073	12.4511	-0.729182	91.4449	-0.0535536
15.9543	175.162	12.451	-0.728972	91.4439	-0.0535381
15.9627	175.244	12.4508	-0.728757	91.443	-0.0535223
15.971	175.326	12.4507	-0.728524	91.442	-0.0535052
15.9793	175.412	12.4505	-0.728292	91.4409	-0.0534882
15.9877	175.495	12.4504	-0.728107	91.4398	-0.0534746
15.996	175.577	12.4502	-0.727896	91.4384	-0.0534591
16.0043	175.66	12.45	-0.727714	91.4372	-0.0534457
16.0127	175.747	12.4499	-0.727485	91.4363	-0.0534289
16.021	175.829	12.4498	-0.727256	91.4353	-0.0534121
16.0293	175.91	12.4496	-0.727024	91.4342	-0.0533951
16.0377	175.995	12.4495	-0.726775	91.4329	-0.0533768
16.046	176.076	12.4493	-0.72654	91.4317	-0.0533595
16.0543	176.161	12.4491	-0.726324	91.4306	-0.0533436
16.0627	176.243	12.449	-0.726112	91.4293	-0.0533281
16.071	176.33	12.4488	-0.725855	91.4281	-0.0533092
16.0793	176.413	12.4487	-0.725633	91.427	-0.0532929
16.0877	176.494	12.4485	-0.725394	91.4259	-0.0532754
16.096	176.579	12.4483	-0.725189	91.4248	-0.0532603
16.1043	176.666	12.4482	-0.724958	91.4237	-0.0532433
16.1127	176.75	12.4481	-0.724742	91.4228	-0.0532274
16.121	176.829	12.448	-0.724549	91.4219	-0.0532133
16.1293	176.909	12.4478	-0.724353	91.4206	-0.0531989
16.1377	176.995	12.4476	-0.724126	91.4195	-0.0531822
16.146	177.078	12.4475	-0.723893	91.4186	-0.0531651
16.1543	177.161	12.4474	-0.723699	91.4176	-0.0531509
16.1627	177.244	12.4473	-0.723491	91.4168	-0.0531356
16.171	177.328	12.4471	-0.723282	91.4158	-0.0531202
16.1793	177.414	12.447	-0.723082	91.4147	-0.0531056
16.1877	177.5	12.4468	-0.722866	91.4133	-0.0530897
16.196	177.582	12.4466	-0.722654	91.4118	-0.0530741
16.2043	177.666	12.4464	-0.722445	91.4105	-0.0530588
16.2127	177.752	12.4463	-0.722228	91.4096	-0.0530428
16.221	177.831	12.4462	-0.72202	91.4088	-0.0530275
16.2293	177.916	12.446	-0.721808	91.4076	-0.053012
16.2377	178.004	12.4458	-0.721595	91.4062	-0.0529963
16.246	178.082	12.4456	-0.721399	91.4049	-0.052982
16.2543	178.168	12.4455	-0.721211	91.404	-0.0529681
16.2627	178.252	12.4453	-0.721005	91.4027	-0.052953
16.271	178.336	12.4452	-0.720844	91.4018	-0.0529412
16.2793	178.42	12.4451	-0.720669	91.4009	-0.0529284
16.2877	178.504	12.445	-0.720459	91.3999	-0.0529129
16.296	178.589	12.4448	-0.72025	91.3986	-0.0528975
16.3043	178.671	12.4446	-0.720031	91.3973	-0.0528814
16.3127	178.756	12.4445	-0.719806	91.3964	-0.052865
16.321	178.837	12.4444	-0.719579	91.3955	-0.0528483
16.3293	178.922	12.4442	-0.719363	91.3945	-0.0528324
16.3377	179.009	12.4441	-0.719155	91.3933	-0.0528171
16.346	179.086	12.4439	-0.718934	91.3923	-0.0528009
16.3543	179.173	12.4438	-0.718685	91.3914	-0.0527826
16.3627	179.26	12.4436	-0.718446	91.3903	-0.0527651
16.371	179.339	12.4435	-0.718213	91.3892	-0.052748
16.3793	179.423	12.4434	-0.717958	91.3882	-0.0527292
16.3877	179.51	12.4432	-0.717733	91.3872	-0.0527127
16.396	179.596	12.4431	-0.717551	91.3861	-0.0526994
16.4043	179.678	12.4429	-0.717368	91.385	-0.0526859
16.4127	179.759	12.4428	-0.717145	91.3838	-0.0526695
16.421	179.847	12.4426	-0.716928	91.3827	-0.0526536
16.4293	179.927	12.4425	-0.716711	91.3816	-0.0526376
16.4377	180.011	12.4423	-0.716503	91.3804	-0.0526224
16.446	180.092	12.4422	-0.716317	91.3794	-0.0526087
16.4543	180.178	12.442	-0.716123	91.378	-0.0525945
16.4627	180.261	12.4418	-0.715967	91.377	-0.052583
16.471	180.344	12.4417	-0.715804	91.3758	-0.0525711
16.4793	180.426	12.4415	-0.715588	91.3748	-0.0525552
16.4877	180.512	12.4414	-0.715368	91.3738	-0.052539
16.496	180.595	12.4412	-0.715194	91.3725	-0.0525263
16.5043	180.677	12.4411	-0.71501	91.3716	-0.0525127
16.5127	180.763	12.4409	-0.714805	91.3704	-0.0524977
16.521	180.842	12.4408	-0.714603	91.3691	-0.0524828
16.5293	180.929	12.4406	-0.714391	91.368	-0.0524673
16.5377	181.011	12.4405	-0.714184	91.367	-0.052452
16.546	181.101	12.4403	-0.713976	91.366	-0.0524368
16.5543	181.181	12.4402	-0.71378	91.365	-0.0524224
16.5627	181.266	12.44	-0.713586	91.3637	-0.0524081
16.571	181.345	12.4399	-0.713395	91.3625	-0.0523941
16.5793	181.429	12.4397	-0.713179	91.3614	-0.0523783
16.5877	181.514	12.4396	-0.712986	91.3603	-0.0523641
16.596	181.594	12.4394	-0.712793	91.3593	-0.0523499
16.6043	181.677	12.4393	-0.712607	91.3584	-0.0523362
16.6127	181.759	12.4392	-0.712416	91.3575	-0.0523222
16.621	181.847	12.4391	-0.712236	91.3566	-0.052309
16.6293	181.932	12.4389	-0.712053	91.3554	-0.0522955
16.6377	182.017	12.4387	-0.711843	91.3543	-0.0522802
16.646	182.098	12.4386	-0.71166	91.3533	-0.0522667
[truncated: 9,860 more rows]
