# Supplementary material for: Comparative study on mechanisms for improving mechanical properties and microstructure of cement paste modified by different types of nanomaterials
Source: publisher site journal article supplement (doi:10.1515/ntrev-2021-0027), 2021-01-01
Supplement: Supplementary file 8 [file NC-0.3-28d.xlsx]

## Sheet: Sheet1
Time (min)	Temperature (°C)	Weight (mg)			Temperature Difference (°C/mg)
0.00346667	21.1245	13.0728	-0.718419	100	-0.0549553
0.00433333	21.1798	13.0728	-0.718537	99.9998	-0.0549643
0.0126667	21.215	13.0727	-0.718638	99.9989	-0.054972
0.021	21.2691	13.0725	-0.718696	99.9981	-0.0549764
0.0293333	21.3183	13.0724	-0.718776	99.9968	-0.0549826
0.0376667	21.3617	13.0721	-0.718856	99.995	-0.0549887
0.046	21.4076	13.0719	-0.718959	99.9934	-0.0549966
0.0543333	21.4531	13.0717	-0.719094	99.9917	-0.0550069
0.0626667	21.502	13.0715	-0.719226	99.9898	-0.055017
0.071	21.543	13.0712	-0.71936	99.9878	-0.0550272
0.0793333	21.5953	13.0709	-0.719457	99.9854	-0.0550347
0.0876667	21.645	13.0706	-0.719515	99.9829	-0.0550391
0.096	21.6873	13.0703	-0.719594	99.9808	-0.0550451
0.104333	21.7259	13.07	-0.719752	99.9784	-0.0550572
0.112667	21.7718	13.0697	-0.719899	99.9764	-0.0550685
0.121	21.8224	13.0695	-0.720143	99.9745	-0.0550871
0.129333	21.8602	13.0692	-0.720375	99.9722	-0.0551048
0.137667	21.9051	13.0688	-0.720599	99.9697	-0.055122
0.146	21.9487	13.0685	-0.720866	99.9673	-0.0551425
0.154333	21.9884	13.0682	-0.721178	99.9648	-0.0551663
0.162667	22.032	13.0679	-0.721549	99.9624	-0.0551947
0.171	22.0759	13.0676	-0.721881	99.9602	-0.0552201
0.179333	22.1215	13.0673	-0.722272	99.9577	-0.05525
0.187667	22.1675	13.0669	-0.722706	99.9552	-0.0552832
0.196	22.2043	13.0666	-0.723145	99.9526	-0.0553168
0.204333	22.2467	13.0662	-0.723549	99.9498	-0.0553476
0.212667	22.2939	13.0659	-0.724007	99.9472	-0.0553827
0.221	22.3379	13.0656	-0.724457	99.9446	-0.0554172
0.229333	22.38	13.0652	-0.724927	99.9419	-0.0554531
0.237667	22.4224	13.0649	-0.725406	99.9393	-0.0554897
0.246	22.4593	13.0645	-0.725885	99.9367	-0.0555264
0.254333	22.4987	13.0641	-0.72642	99.9338	-0.0555673
0.262667	22.5408	13.0638	-0.726957	99.9309	-0.0556083
0.271	22.5806	13.0634	-0.727502	99.928	-0.0556501
0.279333	22.6243	13.063	-0.728081	99.9251	-0.0556944
0.287667	22.6614	13.0626	-0.728694	99.9221	-0.0557412
0.296	22.7025	13.0622	-0.729297	99.919	-0.0557874
0.304333	22.7428	13.0618	-0.729987	99.9161	-0.0558401
0.312667	22.7761	13.0614	-0.730696	99.913	-0.0558944
0.321	22.8158	13.061	-0.731454	99.9098	-0.0559523
0.329333	22.8546	13.0606	-0.732232	99.9065	-0.0560118
0.337667	22.899	13.0602	-0.732979	99.9034	-0.056069
0.346	22.9362	13.0598	-0.733709	99.9005	-0.0561249
0.354333	22.9756	13.0594	-0.734474	99.8973	-0.0561834
0.362667	23.0136	13.059	-0.735222	99.8942	-0.0562406
0.371	23.0512	13.0586	-0.735989	99.8912	-0.0562992
0.379333	23.0898	13.0582	-0.736773	99.8882	-0.0563592
0.387667	23.1231	13.0577	-0.737541	99.8848	-0.056418
0.396	23.1654	13.0573	-0.738313	99.8817	-0.0564771
0.404333	23.2045	13.0569	-0.739064	99.8786	-0.0565345
0.412667	23.245	13.0565	-0.739841	99.8754	-0.0565939
0.421	23.2707	13.0561	-0.740704	99.8721	-0.05666
0.429333	23.3143	13.0556	-0.741616	99.8687	-0.0567297
0.437667	23.3475	13.0552	-0.742471	99.8654	-0.0567951
0.446	23.3899	13.0548	-0.743372	99.862	-0.056864
0.454333	23.4248	13.0543	-0.744288	99.8584	-0.0569341
0.462667	23.4593	13.0538	-0.745188	99.8549	-0.0570029
0.471	23.5009	13.0534	-0.746116	99.8515	-0.0570739
0.479333	23.5352	13.0529	-0.74705	99.8479	-0.0571454
0.487667	23.5735	13.0525	-0.748034	99.8443	-0.0572206
0.496	23.6103	13.052	-0.749023	99.8407	-0.0572963
0.504333	23.6502	13.0515	-0.749984	99.8372	-0.0573698
0.512667	23.6867	13.0511	-0.750949	99.8336	-0.0574436
0.521	23.7201	13.0506	-0.751922	99.8303	-0.057518
0.529333	23.7599	13.0501	-0.75292	99.8265	-0.0575944
0.537667	23.8	13.0496	-0.753945	99.8229	-0.0576728
0.546	23.8309	13.0492	-0.755023	99.8194	-0.0577552
0.554333	23.8773	13.0487	-0.756043	99.816	-0.0578333
0.562667	23.9156	13.0483	-0.757092	99.8124	-0.0579135
0.571	23.9508	13.0478	-0.758127	99.8087	-0.0579927
0.579333	23.9866	13.0473	-0.759117	99.8052	-0.0580684
0.587667	24.0214	13.0468	-0.760179	99.8012	-0.0581497
0.596	24.0563	13.0463	-0.761235	99.7971	-0.0582304
0.604333	24.1002	13.0457	-0.762335	99.7931	-0.0583146
0.612667	24.1405	13.0453	-0.763433	99.7894	-0.0583986
0.621	24.1811	13.0448	-0.764488	99.7855	-0.0584793
0.629333	24.2196	13.0442	-0.765553	99.7816	-0.0585607
0.637667	24.2585	13.0437	-0.766649	99.7775	-0.0586446
0.646	24.299	13.0432	-0.767752	99.7735	-0.058729
0.654333	24.3384	13.0427	-0.768876	99.7695	-0.0588149
0.662667	24.3754	13.0422	-0.770048	99.7656	-0.0589046
0.671	24.4149	13.0417	-0.771146	99.762	-0.0589886
0.679333	24.4574	13.0412	-0.772263	99.7583	-0.059074
0.687667	24.4932	13.0407	-0.773374	99.7545	-0.0591591
0.696	24.5402	13.0402	-0.774503	99.7506	-0.0592453
0.704333	24.5755	13.0397	-0.775667	99.7468	-0.0593344
0.712667	24.6133	13.0392	-0.776773	99.7431	-0.059419
0.721	24.653	13.0387	-0.777905	99.7395	-0.0595056
0.729333	24.6925	13.0382	-0.779037	99.7356	-0.0595922
0.737667	24.7368	13.0377	-0.780172	99.7317	-0.059679
0.746	24.7781	13.0372	-0.781298	99.7277	-0.0597652
0.754333	24.8238	13.0367	-0.782484	99.7235	-0.0598559
0.762667	24.864	13.0361	-0.783674	99.7195	-0.0599469
0.771	24.9044	13.0356	-0.784891	99.7153	-0.06004
0.779333	24.9505	13.0351	-0.786089	99.7114	-0.0601317
0.787667	24.9926	13.0345	-0.787271	99.7074	-0.0602221
0.796	25.0352	13.034	-0.78848	99.7032	-0.0603146
0.804333	25.0775	13.0335	-0.789731	99.6991	-0.0604102
0.812667	25.1239	13.0329	-0.790997	99.695	-0.0605071
0.821	25.1685	13.0324	-0.792202	99.691	-0.0605993
0.829333	25.2105	13.0319	-0.793427	99.687	-0.0606929
0.837667	25.2526	13.0314	-0.794643	99.683	-0.060786
0.846	25.2964	13.0308	-0.795861	99.679	-0.0608792
0.854333	25.345	13.0303	-0.797113	99.6749	-0.0609749
0.862667	25.3945	13.0298	-0.798409	99.6708	-0.061074
0.871	25.438	13.0292	-0.799673	99.6666	-0.0611707
0.879333	25.4832	13.0287	-0.801006	99.6623	-0.0612727
0.887667	25.5298	13.0281	-0.802273	99.6579	-0.0613696
0.896	25.5762	13.0275	-0.803523	99.6536	-0.0614652
0.904333	25.6169	13.0269	-0.804859	99.6492	-0.0615675
0.912667	25.6733	13.0264	-0.806188	99.6449	-0.0616691
0.921	25.7139	13.0258	-0.807515	99.6406	-0.0617706
0.929333	25.7641	13.0252	-0.80888	99.6362	-0.0618751
0.937667	25.8118	13.0247	-0.810228	99.6318	-0.0619782
0.946	25.8638	13.0241	-0.811555	99.6274	-0.0620797
0.954333	25.9074	13.0235	-0.812888	99.623	-0.0621816
0.962667	25.9612	13.023	-0.814224	99.6189	-0.0622838
0.971	26.0081	13.0224	-0.815584	99.6148	-0.0623879
0.979333	26.0583	13.0219	-0.816995	99.6106	-0.0624958
0.987667	26.104	13.0213	-0.818346	99.6064	-0.0625992
0.996	26.1555	13.0208	-0.819708	99.6022	-0.0627033
1.00433	26.2146	13.0202	-0.82106	99.5979	-0.0628068
1.01267	26.2617	13.0197	-0.82242	99.5937	-0.0629108
1.021	26.309	13.0191	-0.823769	99.5895	-0.063014
1.02933	26.3629	13.0185	-0.825161	99.5849	-0.0631204
1.03767	26.4108	13.0179	-0.826567	99.5804	-0.063228
1.046	26.4659	13.0173	-0.827973	99.5755	-0.0633355
1.05433	26.525	13.0167	-0.82937	99.5709	-0.0634424
1.06267	26.5749	13.0161	-0.830754	99.5664	-0.0635482
1.071	26.6287	13.0155	-0.832207	99.5621	-0.0636594
1.07933	26.679	13.015	-0.83369	99.5576	-0.0637728
1.08767	26.7376	13.0144	-0.835217	99.5532	-0.0638897
1.096	26.7884	13.0138	-0.836708	99.5486	-0.0640038
1.10433	26.8483	13.0132	-0.838195	99.5442	-0.0641175
1.11267	26.9017	13.0126	-0.83963	99.5397	-0.0642272
1.121	26.9566	13.012	-0.841156	99.5352	-0.064344
1.12933	27.0124	13.0115	-0.842662	99.5309	-0.0644592
1.13767	27.0638	13.0109	-0.844193	99.5265	-0.0645763
1.146	27.1219	13.0103	-0.845721	99.5219	-0.0646932
1.15433	27.1838	13.0097	-0.847227	99.5172	-0.0648084
1.16267	27.2398	13.0091	-0.84874	99.5124	-0.0649241
1.171	27.3043	13.0085	-0.850233	99.5078	-0.0650383
1.17933	27.3651	13.0078	-0.851758	99.503	-0.065155
1.18767	27.4223	13.0072	-0.853265	99.4982	-0.0652703
1.196	27.4791	13.0066	-0.854835	99.4935	-0.0653904
1.20433	27.534	13.006	-0.856362	99.4887	-0.0655072
1.21267	27.5938	13.0053	-0.857931	99.4835	-0.0656272
1.221	27.65	13.0046	-0.859493	99.4785	-0.0657467
1.22933	27.7122	13.004	-0.861042	99.4736	-0.0658652
1.23767	27.7711	13.0034	-0.862631	99.4689	-0.0659867
1.246	27.8361	13.0027	-0.864211	99.464	-0.0661076
1.25433	27.8942	13.0021	-0.865791	99.4589	-0.0662284
1.26267	27.9505	13.0014	-0.867378	99.454	-0.0663498
1.271	28.0166	13.0008	-0.869013	99.449	-0.0664749
1.27933	28.0821	13.0001	-0.870647	99.444	-0.0665999
1.28767	28.1425	12.9995	-0.872279	99.4391	-0.0667248
1.296	28.2066	12.9989	-0.873898	99.4344	-0.0668486
1.30433	28.2685	12.9982	-0.875508	99.4293	-0.0669717
1.31267	28.3399	12.9975	-0.87713	99.4241	-0.0670958
1.321	28.398	12.9968	-0.878749	99.4189	-0.0672197
1.32933	28.4666	12.9962	-0.880373	99.4137	-0.0673439
1.33767	28.5308	12.9955	-0.882061	99.4088	-0.067473
1.346	28.5948	12.9948	-0.883741	99.4037	-0.0676015
1.35433	28.6617	12.9942	-0.885437	99.3986	-0.0677312
1.36267	28.7282	12.9935	-0.887111	99.3934	-0.0678593
1.371	28.793	12.9928	-0.888807	99.3882	-0.067989
1.37933	28.8571	12.9922	-0.890507	99.3831	-0.0681191
1.38767	28.9276	12.9915	-0.892281	99.3781	-0.0682547
1.396	28.991	12.9908	-0.894043	99.373	-0.0683896
1.40433	29.0599	12.9901	-0.895787	99.3678	-0.068523
1.41267	29.1324	12.9895	-0.897554	99.3625	-0.0686581
1.421	29.1977	12.9887	-0.899302	99.3571	-0.0687918
1.42933	29.2723	12.988	-0.901071	99.3517	-0.0689272
1.43767	29.3373	12.9874	-0.902819	99.3464	-0.0690609
1.446	29.4119	12.9867	-0.904586	99.3412	-0.069196
1.45433	29.4809	12.986	-0.906378	99.3357	-0.0693331
1.46267	29.5472	12.9852	-0.908155	99.3302	-0.069469
1.471	29.6171	12.9845	-0.909917	99.3247	-0.0696038
1.47933	29.6898	12.9838	-0.911737	99.3189	-0.0697431
1.48767	29.7601	12.983	-0.913549	99.3134	-0.0698817
1.496	29.8319	12.9823	-0.915346	99.308	-0.0700192
1.50433	29.9038	12.9816	-0.91718	99.3025	-0.0701594
1.51267	29.9732	12.9809	-0.91902	99.2971	-0.0703001
1.521	30.0516	12.9802	-0.920887	99.2915	-0.070443
1.52933	30.124	12.9794	-0.92273	99.2858	-0.0705839
1.53767	30.1949	12.9787	-0.924562	99.28	-0.0707241
1.546	30.2653	12.9779	-0.926454	99.2744	-0.0708689
1.55433	30.3434	12.9772	-0.928344	99.269	-0.0710134
1.56267	30.4188	12.9765	-0.930215	99.2634	-0.0711565
1.571	30.4874	12.9758	-0.93213	99.2578	-0.071303
1.57933	30.5679	12.975	-0.934073	99.252	-0.0714517
1.58767	30.6385	12.9742	-0.935989	99.2461	-0.0715982
1.596	30.7195	12.9735	-0.937915	99.2402	-0.0717455
1.60433	30.7862	12.9727	-0.93986	99.2342	-0.0718943
1.61267	30.8685	12.9719	-0.941828	99.2286	-0.0720449
1.621	30.9433	12.9712	-0.943772	99.223	-0.0721935
1.62933	31.0187	12.9704	-0.94566	99.217	-0.072338
1.63767	31.0939	12.9696	-0.947617	99.2108	-0.0724877
1.646	31.1701	12.9688	-0.949579	99.2047	-0.0726378
1.65433	31.2521	12.968	-0.951549	99.1986	-0.0727884
1.66267	31.3283	12.9672	-0.953522	99.1925	-0.0729394
1.671	31.4026	12.9665	-0.955488	99.1866	-0.0730898
1.67933	31.4827	12.9657	-0.95746	99.1806	-0.0732406
1.68767	31.5612	12.9649	-0.959439	99.1744	-0.073392
1.696	31.6342	12.964	-0.961483	99.168	-0.0735484
1.70433	31.7202	12.9632	-0.963537	99.1616	-0.0737055
1.71267	31.7955	12.9624	-0.965619	99.1553	-0.0738648
1.721	31.8767	12.9616	-0.967676	99.1491	-0.0740221
1.72933	31.9563	12.9608	-0.969746	99.143	-0.0741805
1.73767	32.0311	12.9599	-0.971862	99.1368	-0.0743423
1.746	32.1155	12.9591	-0.973937	99.1306	-0.0745011
1.75433	32.1907	12.9583	-0.976017	99.1241	-0.0746601
1.76267	32.2711	12.9575	-0.97813	99.1177	-0.0748218
1.771	32.3512	12.9566	-0.980248	99.1113	-0.0749838
1.77933	32.4338	12.9558	-0.982342	99.1049	-0.075144
1.78767	32.5053	12.955	-0.984428	99.0988	-0.0753035
1.796	32.5863	12.9541	-0.986561	99.0923	-0.0754667
1.80433	32.6707	12.9533	-0.988715	99.0857	-0.0756315
1.81267	32.7461	12.9524	-0.990886	99.0789	-0.0757975
1.821	32.834	12.9515	-0.993002	99.0723	-0.0759594
1.82933	32.9093	12.9507	-0.995204	99.0657	-0.0761279
1.83767	32.9931	12.9498	-0.997418	99.059	-0.0762972
1.846	33.074	12.9489	-0.999638	99.0522	-0.076467
1.85433	33.161	12.948	-1.00183	99.0453	-0.0766344
1.86267	33.2401	12.9471	-1.00401	99.0385	-0.0768015
1.871	33.3171	12.9462	-1.00627	99.0318	-0.076974
1.87933	33.4004	12.9453	-1.00852	99.0249	-0.0771463
1.88767	33.4819	12.9444	-1.01075	99.0181	-0.077317
1.896	33.5649	12.9436	-1.01298	99.0114	-0.0774875
1.90433	33.646	12.9427	-1.01525	99.0045	-0.0776614
1.91267	33.7302	12.9417	-1.0175	98.9975	-0.0778334
1.921	33.8107	12.9408	-1.01976	98.9906	-0.0780065
1.92933	33.8975	12.9399	-1.02201	98.9835	-0.0781787
1.93767	33.9808	12.939	-1.0243	98.9764	-0.0783535
1.946	34.063	12.938	-1.02665	98.9692	-0.0785335
1.95433	34.1468	12.9371	-1.02898	98.9617	-0.0787118
1.96267	34.2343	12.9361	-1.03127	98.9543	-0.0788867
1.971	34.3107	12.9351	-1.03361	98.9468	-0.079066
1.97933	34.395	12.9341	-1.03598	98.9393	-0.0792472
1.98767	34.477	12.9332	-1.03834	98.9319	-0.0794273
1.996	34.5624	12.9322	-1.04069	98.9246	-0.0796074
2.00433	34.6474	12.9312	-1.0431	98.9171	-0.0797912
2.01267	34.7374	12.9303	-1.04551	98.9098	-0.0799761
2.021	34.8206	12.9293	-1.04796	98.9025	-0.0801636
2.02933	34.907	12.9284	-1.05033	98.8951	-0.0803449
2.03767	34.9938	12.9274	-1.0527	98.8876	-0.0805263
2.046	35.0723	12.9264	-1.05512	98.88	-0.0807111
2.05433	35.1542	12.9254	-1.05755	98.8728	-0.0808967
2.06267	35.2388	12.9244	-1.05997	98.865	-0.0810817
2.071	35.3226	12.9234	-1.0624	98.8575	-0.0812683
2.07933	35.4097	12.9224	-1.06489	98.8497	-0.0814584
2.08767	35.4958	12.9214	-1.06733	98.842	-0.0816449
2.096	35.5823	12.9204	-1.06975	98.8342	-0.0818305
2.10433	35.6618	12.9194	-1.07216	98.8263	-0.0820143
2.11267	35.7498	12.9184	-1.07461	98.8187	-0.0822023
2.121	35.8395	12.9174	-1.07709	98.811	-0.0823919
2.12933	35.9223	12.9164	-1.07959	98.8035	-0.0825827
2.13767	36.0106	12.9154	-1.08204	98.7956	-0.0827707
2.146	36.0941	12.9143	-1.08455	98.7879	-0.0829623
2.15433	36.1803	12.9133	-1.08709	98.7798	-0.0831568
2.16267	36.2611	12.9122	-1.08962	98.7715	-0.0833499
2.171	36.3467	12.9111	-1.09215	98.7634	-0.0835438
2.17933	36.4271	12.9101	-1.09469	98.7553	-0.0837381
2.18767	36.5181	12.909	-1.09728	98.747	-0.0839361
2.196	36.6047	12.9079	-1.09987	98.7387	-0.0841342
2.20433	36.6955	12.9068	-1.10248	98.7301	-0.084334
2.21267	36.7779	12.9056	-1.10508	98.7213	-0.0845328
2.221	36.869	12.9045	-1.10767	98.7127	-0.0847308
2.22933	36.9587	12.9034	-1.11027	98.7042	-0.0849299
2.23767	37.047	12.9023	-1.11284	98.6956	-0.0851264
2.246	37.129	12.9012	-1.11545	98.6872	-0.0853259
2.25433	37.2108	12.9001	-1.11806	98.6787	-0.0855254
2.26267	37.3009	12.8989	-1.1207	98.6701	-0.0857279
2.271	37.389	12.8978	-1.12335	98.6616	-0.08593
2.27933	37.476	12.8967	-1.126	98.6529	-0.0861332
2.28767	37.5589	12.8956	-1.12866	98.6442	-0.0863362
2.296	37.6423	12.8945	-1.13135	98.6358	-0.0865421
2.30433	37.7321	12.8933	-1.13404	98.6271	-0.0867482
2.31267	37.8204	12.8922	-1.13675	98.6185	-0.0869555
2.321	37.9051	12.8911	-1.13946	98.6099	-0.0871628
2.32933	37.9936	12.89	-1.14209	98.6014	-0.0873641
2.33767	38.0775	12.8888	-1.14477	98.5927	-0.0875692
2.346	38.1707	12.8877	-1.14749	98.5839	-0.0877766
2.35433	38.2535	12.8865	-1.1502	98.575	-0.0879845
2.36267	38.3368	12.8853	-1.15293	98.5658	-0.0881929
2.371	38.4247	12.8842	-1.15567	98.557	-0.0884024
2.37933	38.5135	12.883	-1.1584	98.548	-0.0886116
2.38767	38.5981	12.8818	-1.16118	98.5387	-0.088824
2.396	38.685	12.8806	-1.16393	98.5295	-0.0890341
2.40433	38.771	12.8793	-1.16668	98.5201	-0.0892448
2.41267	38.8582	12.8781	-1.16952	98.5108	-0.0894624
2.421	38.9468	12.8769	-1.17235	98.5015	-0.0896786
2.42933	39.0296	12.8757	-1.17516	98.4924	-0.0898934
2.43767	39.1181	12.8745	-1.17797	98.4832	-0.0901086
2.446	39.2064	12.8733	-1.18076	98.4739	-0.0903222
2.45433	39.2916	12.8721	-1.18359	98.4644	-0.0905381
2.46267	39.3801	12.8708	-1.18642	98.455	-0.0907552
2.471	39.4684	12.8696	-1.18924	98.4457	-0.0909703
2.47933	39.5569	12.8684	-1.19207	98.4363	-0.0911874
2.48767	39.6349	12.8672	-1.19494	98.427	-0.091407
2.496	39.7231	12.8659	-1.1978	98.4173	-0.0916252
2.50433	39.8064	12.8646	-1.20068	98.4076	-0.0918454
2.51267	39.8956	12.8633	-1.20361	98.3977	-0.0920696
2.521	39.9817	12.862	-1.20648	98.3878	-0.0922896
2.52933	40.0645	12.8607	-1.20941	98.3779	-0.0925134
2.53767	40.1552	12.8595	-1.21234	98.3681	-0.0927377
2.546	40.2419	12.8582	-1.21527	98.3583	-0.0929616
2.55433	40.3267	12.8569	-1.21822	98.3482	-0.0931876
2.56267	40.4133	12.8555	-1.22119	98.3381	-0.0934145
2.571	40.4986	12.8542	-1.22419	98.3278	-0.0936444
2.57933	40.5854	12.8529	-1.22718	98.3177	-0.0938725
2.58767	40.6743	12.8515	-1.2302	98.3074	-0.0941035
2.596	40.7588	12.8502	-1.23317	98.2972	-0.0943307
2.60433	40.8463	12.8489	-1.23617	98.2872	-0.0945602
2.61267	40.9299	12.8476	-1.23918	98.2773	-0.0947909
2.621	41.0128	12.8463	-1.24218	98.2673	-0.0950204
2.62933	41.1025	12.845	-1.24521	98.2571	-0.0952524
2.63767	41.1914	12.8436	-1.24826	98.2469	-0.095485
2.646	41.2722	12.8423	-1.25129	98.2366	-0.0957171
2.65433	41.3635	12.8409	-1.25428	98.2263	-0.0959456
2.66267	41.4472	12.8396	-1.2573	98.2164	-0.0961766
2.671	41.5308	12.8383	-1.26032	98.206	-0.0964077
2.67933	41.6186	12.8369	-1.26334	98.1958	-0.0966391
2.68767	41.7058	12.8355	-1.26643	98.1851	-0.0968752
2.696	41.7874	12.8341	-1.26948	98.1743	-0.0971083
2.70433	41.8706	12.8327	-1.27254	98.1636	-0.0973423
2.71267	41.9515	12.8313	-1.2756	98.1529	-0.0975769
2.721	42.0402	12.8299	-1.27867	98.1422	-0.0978112
2.72933	42.1239	12.8285	-1.28172	98.1314	-0.098045
2.73767	42.2082	12.8271	-1.28483	98.1205	-0.0982825
2.746	42.2969	12.8256	-1.28792	98.1094	-0.0985188
2.75433	42.3794	12.8242	-1.29099	98.0984	-0.0987541
2.76267	42.4573	12.8228	-1.29411	98.0875	-0.0989924
2.771	42.5476	12.8214	-1.29721	98.0767	-0.0992295
2.77933	42.629	12.82	-1.30036	98.0658	-0.0994704
2.78767	42.7179	12.8185	-1.30347	98.0548	-0.0997089
2.796	42.8024	12.8171	-1.30658	98.0437	-0.0999463
2.80433	42.89	12.8156	-1.3097	98.0326	-0.100185
2.81267	42.9715	12.8142	-1.31284	98.0215	-0.100425
2.821	43.054	12.8127	-1.31597	98.0103	-0.100665
2.82933	43.143	12.8112	-1.3191	97.9991	-0.100904
2.83767	43.2259	12.8098	-1.32224	97.988	-0.101144
2.846	43.3107	12.8083	-1.3254	97.9767	-0.101386
2.85433	43.3938	12.8068	-1.32851	97.9652	-0.101624
2.86267	43.4754	12.8053	-1.33163	97.9535	-0.101863
2.871	43.557	12.8037	-1.33479	97.9418	-0.102104
2.87933	43.6441	12.8022	-1.33794	97.9303	-0.102346
2.88767	43.7347	12.8007	-1.34113	97.9187	-0.102589
2.896	43.8125	12.7992	-1.34427	97.9073	-0.10283
2.90433	43.9	12.7977	-1.34744	97.8959	-0.103072
2.91267	43.9777	12.7962	-1.35066	97.8844	-0.103318
2.921	44.0604	12.7947	-1.35389	97.8725	-0.103566
2.92933	44.1444	12.7931	-1.35705	97.8607	-0.103807
2.93767	44.2262	12.7916	-1.36028	97.8489	-0.104054
2.946	44.311	12.7901	-1.36352	97.8372	-0.104302
2.95433	44.3974	12.7886	-1.36673	97.8256	-0.104548
2.96267	44.4808	12.787	-1.36994	97.814	-0.104793
2.971	44.5646	12.7855	-1.37319	97.8022	-0.105042
2.97933	44.6435	12.7839	-1.37646	97.7904	-0.105292
2.98767	44.728	12.7823	-1.37968	97.7781	-0.105538
2.996	44.813	12.7808	-1.38289	97.766	-0.105783
3.00433	44.886	12.7792	-1.38609	97.7543	-0.106029
3.01267	44.9737	12.7777	-1.38933	97.7424	-0.106276
3.021	45.058	12.7761	-1.39252	97.7305	-0.10652
3.02933	45.1382	12.7745	-1.39568	97.7185	-0.106762
3.03767	45.2239	12.773	-1.39887	97.7065	-0.107006
3.046	45.3074	12.7713	-1.40212	97.6941	-0.107255
3.05433	45.3813	12.7698	-1.40533	97.6818	-0.1075
3.06267	45.4704	12.7681	-1.40852	97.6694	-0.107744
3.071	45.5504	12.7665	-1.41175	97.657	-0.107992
3.07933	45.6282	12.7649	-1.41497	97.6445	-0.108238
3.08767	45.7113	12.7632	-1.41819	97.632	-0.108484
3.096	45.8014	12.7616	-1.42143	97.6193	-0.108732
3.10433	45.8783	12.7599	-1.42465	97.6067	-0.108978
3.11267	45.9645	12.7583	-1.42789	97.5942	-0.109226
3.121	46.0385	12.7566	-1.43117	97.5815	-0.109477
3.12933	46.1221	12.755	-1.43437	97.5692	-0.109722
3.13767	46.2078	12.7534	-1.43754	97.5567	-0.109964
3.146	46.2893	12.7517	-1.44076	97.5441	-0.110211
3.15433	46.3707	12.7501	-1.44397	97.5315	-0.110456
3.16267	46.4499	12.7484	-1.44717	97.5188	-0.110701
3.171	46.531	12.7468	-1.45039	97.5061	-0.110947
3.17933	46.6116	12.7452	-1.45356	97.4937	-0.111189
3.18767	46.6931	12.7435	-1.45676	97.4812	-0.111434
3.196	46.7707	12.7419	-1.45992	97.4685	-0.111676
3.20433	46.8573	12.7402	-1.46307	97.4557	-0.111917
3.21267	46.9361	12.7385	-1.46624	97.4428	-0.11216
3.221	47.0189	12.7368	-1.46944	97.4299	-0.112405
3.22933	47.0975	12.7352	-1.47258	97.4175	-0.112645
3.23767	47.1791	12.7335	-1.47567	97.4049	-0.112881
3.246	47.2606	12.7319	-1.47877	97.3924	-0.113118
3.25433	47.3416	12.7303	-1.48186	97.3798	-0.113354
3.26267	47.4245	12.7286	-1.48495	97.367	-0.113591
3.271	47.5024	12.7269	-1.48803	97.354	-0.113827
3.27933	47.5822	12.7252	-1.49115	97.3412	-0.114065
3.28767	47.663	12.7235	-1.49425	97.3284	-0.114302
3.296	47.7386	12.7219	-1.49731	97.3155	-0.114537
3.30433	47.8231	12.7202	-1.50035	97.3026	-0.114769
3.31267	47.8975	12.7185	-1.50338	97.2895	-0.115001
3.321	47.9756	12.7168	-1.50646	97.2766	-0.115236
3.32933	48.058	12.7151	-1.50953	97.2639	-0.115471
3.33767	48.1358	12.7134	-1.51252	97.2509	-0.115699
3.346	48.2152	12.7117	-1.51553	97.238	-0.11593
3.35433	48.2973	12.71	-1.51856	97.225	-0.116162
3.36267	48.381	12.7083	-1.52151	97.2121	-0.116387
3.371	48.4587	12.7066	-1.52444	97.1989	-0.116611
3.37933	48.5398	12.7049	-1.52737	97.1859	-0.116836
3.38767	48.6196	12.7032	-1.5303	97.173	-0.11706
3.396	48.6996	12.7015	-1.53321	97.1601	-0.117283
3.40433	48.7808	12.6998	-1.53608	97.1469	-0.117502
3.41267	48.855	12.6981	-1.53893	97.1338	-0.11772
3.421	48.9378	12.6964	-1.54183	97.121	-0.117942
3.42933	49.0156	12.6947	-1.54464	97.108	-0.118156
3.43767	49.0982	12.6931	-1.54739	97.0952	-0.118367
3.446	49.1789	12.6914	-1.55021	97.0824	-0.118583
3.45433	49.2549	12.6897	-1.55298	97.0694	-0.118795
3.46267	49.3384	12.688	-1.55573	97.0568	-0.119005
3.471	49.4139	12.6864	-1.55847	97.0439	-0.119215
3.47933	49.4984	12.6847	-1.56118	97.0311	-0.119422
3.48767	49.5721	12.683	-1.56387	97.0184	-0.119628
3.496	49.654	12.6813	-1.56652	97.0054	-0.119831
3.50433	49.7325	12.6796	-1.56914	96.9923	-0.120031
3.51267	49.8113	12.6779	-1.57177	96.9794	-0.120232
3.521	49.887	12.6762	-1.57441	96.9664	-0.120434
3.52933	49.9703	12.6745	-1.57698	96.9534	-0.12063
3.53767	50.0456	12.6729	-1.57954	96.9407	-0.120827
3.546	50.1249	12.6712	-1.58206	96.9277	-0.121019
3.55433	50.2043	12.6695	-1.58452	96.915	-0.121208
3.56267	50.2807	12.6678	-1.58701	96.9023	-0.121398
3.571	50.3605	12.6662	-1.58945	96.8895	-0.121585
3.57933	50.4375	12.6645	-1.59191	96.8768	-0.121773
3.58767	50.5195	12.6629	-1.59432	96.8642	-0.121957
3.596	50.596	12.6612	-1.59667	96.8515	-0.122137
3.60433	50.6752	12.6595	-1.59899	96.8386	-0.122315
3.61267	50.7563	12.6579	-1.60128	96.8259	-0.122489
3.621	50.8303	12.6562	-1.60354	96.8132	-0.122662
3.62933	50.9094	12.6545	-1.60576	96.8005	-0.122832
3.63767	50.986	12.6529	-1.60798	96.7878	-0.123002
3.646	51.07	12.6512	-1.61015	96.7748	-0.123168
3.65433	51.1501	12.6495	-1.6123	96.7624	-0.123332
3.66267	51.2295	12.6479	-1.61437	96.7497	-0.123491
3.671	51.3045	12.6463	-1.6164	96.7373	-0.123646
3.67933	51.3847	12.6446	-1.61846	96.7248	-0.123803
3.68767	51.4646	12.6431	-1.62049	96.7128	-0.123959
3.696	51.5411	12.6415	-1.62251	96.7006	-0.124113
3.70433	51.623	12.6399	-1.62448	96.6885	-0.124264
3.71267	51.7026	12.6383	-1.62637	96.6761	-0.124409
3.721	51.7809	12.6366	-1.62825	96.6636	-0.124553
3.72933	51.8559	12.635	-1.63012	96.651	-0.124696
3.73767	51.9386	12.6333	-1.63194	96.6384	-0.124835
3.746	52.0202	12.6317	-1.63378	96.6258	-0.124975
3.75433	52.097	12.63	-1.6356	96.6131	-0.125114
3.76267	52.1728	12.6284	-1.63736	96.6004	-0.125249
3.771	52.2463	12.6267	-1.63908	96.5878	-0.125381
3.77933	52.33	12.6251	-1.64076	96.5753	-0.125509
3.78767	52.4084	12.6235	-1.6424	96.5629	-0.125635
3.796	52.4863	12.6219	-1.64408	96.5506	-0.125763
3.80433	52.5692	12.6203	-1.64573	96.5385	-0.12589
3.81267	52.6482	12.6187	-1.64731	96.5267	-0.126011
3.821	52.7271	12.6172	-1.64889	96.5147	-0.126132
3.82933	52.8004	12.6156	-1.65042	96.5025	-0.126248
3.83767	52.8792	12.614	-1.65192	96.4905	-0.126363
3.846	52.9586	12.6124	-1.65336	96.4784	-0.126473
3.85433	53.0304	12.6108	-1.65476	96.466	-0.12658
3.86267	53.1186	12.6092	-1.65615	96.4541	-0.126687
3.871	53.1962	12.6077	-1.65753	96.4419	-0.126793
3.87933	53.268	12.6061	-1.65887	96.4298	-0.126895
3.88767	53.3532	12.6045	-1.66016	96.4177	-0.126994
3.896	53.4292	12.6029	-1.66142	96.4057	-0.12709
3.90433	53.5127	12.6014	-1.66265	96.3938	-0.127184
3.91267	53.5871	12.5998	-1.66383	96.3821	-0.127274
3.921	53.6634	12.5983	-1.665	96.3703	-0.127363
3.92933	53.7408	12.5968	-1.66622	96.3587	-0.127457
3.93767	53.8239	12.5953	-1.66736	96.3471	-0.127545
3.946	53.9032	12.5937	-1.66846	96.3353	-0.127629
3.95433	53.981	12.5922	-1.66951	96.3235	-0.127709
3.96267	54.0624	12.5907	-1.67058	96.3119	-0.12779
3.971	54.1442	12.5891	-1.6716	96.3003	-0.127868
3.97933	54.2243	12.5876	-1.67261	96.2886	-0.127946
3.98767	54.296	12.5861	-1.67356	96.277	-0.128018
3.996	54.3787	12.5846	-1.6745	96.2654	-0.12809
4.00433	54.4622	12.5831	-1.6754	96.2537	-0.128159
4.01267	54.5348	12.5816	-1.67622	96.2423	-0.128222
4.021	54.6161	12.58	-1.67706	96.2307	-0.128286
4.02933	54.6956	12.5785	-1.67789	96.2192	-0.12835
4.03767	54.7701	12.577	-1.67873	96.2077	-0.128414
4.046	54.847	12.5755	-1.67949	96.1963	-0.128472
4.05433	54.9284	12.574	-1.68021	96.1848	-0.128527
4.06267	55.0091	12.5725	-1.6809	96.173	-0.12858
4.071	55.0847	12.571	-1.68162	96.1615	-0.128635
4.07933	55.1627	12.5695	-1.68231	96.1502	-0.128688
4.08767	55.2432	12.568	-1.68297	96.1389	-0.128738
4.096	55.3213	12.5665	-1.6836	96.1274	-0.128787
4.10433	55.3999	12.5651	-1.68424	96.1161	-0.128836
4.11267	55.4784	12.5635	-1.68484	96.1045	-0.128881
4.121	55.5595	12.5621	-1.68537	96.0931	-0.128922
4.12933	55.6372	12.5606	-1.68593	96.0816	-0.128964
4.13767	55.7167	12.5591	-1.68649	96.0703	-0.129008
4.146	55.7957	12.5577	-1.68704	96.0595	-0.12905
4.15433	55.8752	12.5562	-1.68755	96.0484	-0.129089
4.16267	55.9547	12.5548	-1.68802	96.0372	-0.129125
4.171	56.0321	12.5533	-1.68846	96.0259	-0.129158
4.17933	56.1121	12.5518	-1.68888	96.0149	-0.129191
4.18767	56.1897	12.5504	-1.68927	96.0038	-0.12922
4.196	56.2683	12.549	-1.68964	95.9931	-0.129249
4.20433	56.3524	12.5476	-1.69003	95.9823	-0.129278
4.21267	56.4254	12.5462	-1.69036	95.9715	-0.129303
4.221	56.5031	12.5448	-1.69066	95.9607	-0.129327
4.22933	56.5894	12.5433	-1.69094	95.9497	-0.129348
4.23767	56.6668	12.5419	-1.69118	95.9387	-0.129366
4.246	56.7425	12.5404	-1.69141	95.9278	-0.129384
4.25433	56.821	12.539	-1.69166	95.9169	-0.129403
4.26267	56.9011	12.5376	-1.69188	95.9059	-0.12942
4.271	56.9768	12.5362	-1.69207	95.895	-0.129434
4.27933	57.0586	12.5348	-1.69226	95.8842	-0.129449
4.28767	57.1402	12.5333	-1.69238	95.8733	-0.129458
4.296	57.2217	12.5319	-1.69251	95.8625	-0.129468
4.30433	57.2992	12.5305	-1.69263	95.8516	-0.129477
4.31267	57.3764	12.5291	-1.69273	95.8408	-0.129485
4.321	57.4513	12.5277	-1.69282	95.83	-0.129492
4.32933	57.5354	12.5263	-1.69289	95.8193	-0.129497
4.33767	57.6128	12.5249	-1.69294	95.8089	-0.129501
4.346	57.6937	12.5235	-1.69299	95.7985	-0.129505
4.35433	57.7743	12.5221	-1.69301	95.7878	-0.129507
4.36267	57.8539	12.5207	-1.69301	95.777	-0.129507
4.371	57.9354	12.5193	-1.69303	95.7662	-0.129508
4.37933	58.0102	12.5179	-1.69301	95.7552	-0.129506
4.38767	58.0875	12.5165	-1.69298	95.7444	-0.129504
4.396	58.1655	12.5151	-1.69293	95.7338	-0.1295
4.40433	58.2459	12.5137	-1.69289	95.7231	-0.129497
4.41267	58.328	12.5123	-1.69283	95.7126	-0.129492
4.421	58.3997	12.5109	-1.69271	95.7018	-0.129483
4.42933	58.4901	12.5095	-1.69263	95.6911	-0.129477
4.43767	58.568	12.5081	-1.69252	95.6806	-0.129469
4.446	58.6463	12.5068	-1.69237	95.6702	-0.129458
4.45433	58.7292	12.5054	-1.6922	95.66	-0.129445
4.46267	58.8016	12.5041	-1.69201	95.6501	-0.12943
4.471	58.8843	12.5028	-1.69177	95.6399	-0.129412
4.47933	58.9601	12.5015	-1.69151	95.6297	-0.129391
4.48767	59.0373	12.5002	-1.69122	95.6198	-0.129369
4.496	59.1159	12.4988	-1.69097	95.6095	-0.12935
4.50433	59.1954	12.4975	-1.69071	95.5996	-0.12933
4.51267	59.2794	12.4962	-1.69041	95.5897	-0.129307
4.521	59.3609	12.4949	-1.69013	95.5797	-0.129286
4.52933	59.4391	12.4936	-1.68983	95.5697	-0.129263
4.53767	59.5181	12.4923	-1.6895	95.5597	-0.129238
4.546	59.5944	12.491	-1.68921	95.5496	-0.129215
4.55433	59.6763	12.4897	-1.68891	95.5397	-0.129192
4.56267	59.7547	12.4884	-1.6886	95.5299	-0.129169
4.571	59.8355	12.4871	-1.68829	95.5199	-0.129145
4.57933	59.9146	12.4858	-1.68795	95.5101	-0.12912
4.58767	60.0033	12.4845	-1.6876	95.5	-0.129092
4.596	60.0769	12.4832	-1.68724	95.4897	-0.129065
4.60433	60.163	12.4818	-1.68681	95.4795	-0.129032
4.61267	60.2385	12.4805	-1.6864	95.4691	-0.129001
4.621	60.315	12.4791	-1.68603	95.4588	-0.128973
4.62933	60.3959	12.4778	-1.68561	95.4489	-0.12894
4.63767	60.4774	12.4765	-1.6852	95.4388	-0.128909
4.646	60.5616	12.4752	-1.68477	95.429	-0.128876
4.65433	60.6447	12.474	-1.68432	95.4192	-0.128841
4.66267	60.7249	12.4727	-1.68381	95.4092	-0.128802
4.671	60.8049	12.4714	-1.68329	95.3995	-0.128763
4.67933	60.8849	12.4701	-1.68275	95.39	-0.128721
4.68767	60.9644	12.4689	-1.68222	95.3805	-0.128681
4.696	61.0485	12.4677	-1.68169	95.3712	-0.12864
4.70433	61.1309	12.4664	-1.68111	95.3617	-0.128596
4.71267	61.2049	12.4652	-1.68053	95.3521	-0.128552
4.721	61.2891	12.4639	-1.67994	95.3425	-0.128506
4.72933	61.366	12.4627	-1.67935	95.3327	-0.128462
4.73767	61.4473	12.4614	-1.67879	95.3231	-0.128419
4.746	61.5266	12.4602	-1.67824	95.3136	-0.128377
4.75433	61.6076	12.4589	-1.67767	95.3038	-0.128333
4.76267	61.6852	12.4576	-1.67712	95.294	-0.128291
4.771	61.768	12.4563	-1.67657	95.2843	-0.128249
4.77933	61.8477	12.4551	-1.67596	95.2747	-0.128202
4.78767	61.929	12.4538	-1.67534	95.2653	-0.128155
4.796	62.0113	12.4526	-1.67472	95.2558	-0.128107
4.80433	62.0921	12.4514	-1.6741	95.2465	-0.12806
4.81267	62.1755	12.4502	-1.67347	95.2371	-0.128012
4.821	62.257	12.4489	-1.6728	95.2275	-0.12796
4.82933	62.3349	12.4476	-1.67215	95.2179	-0.127911
4.83767	62.4169	12.4464	-1.67149	95.2087	-0.12786
4.846	62.4983	12.4452	-1.67082	95.1996	-0.127809
4.85433	62.5758	12.4441	-1.67011	95.1905	-0.127754
4.86267	62.6564	12.4429	-1.66944	95.1814	-0.127703
4.871	62.7379	12.4417	-1.66875	95.1721	-0.12765
4.87933	62.823	12.4405	-1.66804	95.1631	-0.127596
4.88767	62.9013	12.4393	-1.66729	95.1538	-0.127539
4.896	62.9823	12.4381	-1.66654	95.1446	-0.127481
4.90433	63.0675	12.4369	-1.66581	95.1354	-0.127426
4.91267	63.1428	12.4357	-1.66506	95.1262	-0.127369
4.921	63.2301	12.4344	-1.66434	95.1169	-0.127313
4.92933	63.3099	12.4332	-1.6636	95.1075	-0.127256
4.93767	63.385	12.4321	-1.66281	95.0987	-0.127196
4.946	63.4787	12.4309	-1.66204	95.0895	-0.127137
4.95433	63.5572	12.4297	-1.66128	95.0803	-0.127079
4.96267	63.6325	12.4284	-1.66053	95.0708	-0.127022
4.971	63.7121	12.4273	-1.6598	95.062	-0.126966
4.97933	63.7969	12.4261	-1.65904	95.0529	-0.126908
4.98767	63.8778	12.4249	-1.65826	95.0439	-0.126848
4.996	63.96	12.4237	-1.65748	95.035	-0.126788
5.00433	64.0431	12.4226	-1.65666	95.0261	-0.126726
5.01267	64.1222	12.4214	-1.65583	95.0171	-0.126662
5.021	64.2069	12.4201	-1.65502	95.0074	-0.1266
5.02933	64.2813	12.4189	-1.65422	94.9982	-0.126539
5.03767	64.3719	12.4177	-1.65338	94.9891	-0.126475
5.046	64.4489	12.4166	-1.65257	94.9801	-0.126413
5.05433	64.5272	12.4154	-1.65176	94.9709	-0.126351
5.06267	64.6095	12.4141	-1.65092	94.9617	-0.126287
5.071	64.689	12.4129	-1.6501	94.9524	-0.126224
5.07933	64.7753	12.4117	-1.64928	94.9431	-0.126161
5.08767	64.8549	12.4105	-1.64844	94.9338	-0.126097
5.096	64.9349	12.4093	-1.64761	94.9249	-0.126034
5.10433	65.0203	12.4082	-1.64681	94.9159	-0.125972
5.11267	65.1028	12.407	-1.64597	94.9071	-0.125908
5.121	65.1843	12.4059	-1.64516	94.8983	-0.125846
5.12933	65.2639	12.4047	-1.64432	94.8893	-0.125782
5.13767	65.3469	12.4035	-1.64345	94.8804	-0.125715
5.146	65.4251	12.4023	-1.64263	94.8713	-0.125652
5.15433	65.5061	12.4012	-1.64179	94.8625	-0.125588
5.16267	65.5937	12.4	-1.64091	94.8537	-0.125521
5.171	65.6706	12.3989	-1.64005	94.845	-0.125455
5.17933	65.7586	12.3977	-1.63919	94.8361	-0.12539
5.18767	65.8373	12.3966	-1.63834	94.8275	-0.125324
5.196	65.9192	12.3954	-1.63749	94.8184	-0.125259
5.20433	66.0001	12.3942	-1.63665	94.8093	-0.125195
5.21267	66.082	12.3931	-1.63582	94.8003	-0.125131
5.221	66.1667	12.3919	-1.63499	94.7916	-0.125068
5.22933	66.2488	12.3908	-1.63414	94.7831	-0.125003
5.23767	66.3324	12.3896	-1.6333	94.7743	-0.124939
5.246	66.4148	12.3885	-1.63247	94.7652	-0.124876
5.25433	66.5	12.3873	-1.63166	94.7564	-0.124814
5.26267	66.5782	12.3862	-1.63082	94.7475	-0.124749
5.271	66.6592	12.385	-1.63002	94.7387	-0.124688
5.27933	66.7427	12.3839	-1.62924	94.7302	-0.124629
5.28767	66.8221	12.3828	-1.62839	94.7219	-0.124564
5.296	66.9048	12.3817	-1.62757	94.7133	-0.1245
5.30433	66.9841	12.3805	-1.62677	94.7046	-0.124439
5.31267	67.0707	12.3794	-1.62596	94.6958	-0.124378
5.321	67.1503	12.3782	-1.62517	94.687	-0.124317
5.32933	67.2352	12.3771	-1.62437	94.6784	-0.124255
5.33767	67.3191	12.376	-1.62356	94.6696	-0.124194
5.346	67.4031	12.3748	-1.62278	94.6609	-0.124134
5.35433	67.4831	12.3737	-1.62198	94.6524	-0.124073
5.36267	67.5653	12.3726	-1.62118	94.6437	-0.124012
5.371	67.6422	12.3714	-1.6204	94.6349	-0.123952
5.37933	67.7262	12.3703	-1.61964	94.6262	-0.123894
5.38767	67.8127	12.3691	-1.61885	94.6173	-0.123833
5.396	67.895	12.368	-1.61811	94.6085	-0.123777
5.40433	67.9749	12.3669	-1.61736	94.6	-0.123719
5.41267	68.057	12.3658	-1.61664	94.5915	-0.123664
5.421	68.1409	12.3647	-1.61594	94.5832	-0.123611
5.42933	68.2215	12.3636	-1.61522	94.5747	-0.123555
5.43767	68.3028	12.3624	-1.61451	94.5658	-0.123502
5.446	68.3893	12.3612	-1.6138	94.5569	-0.123447
5.45433	68.4662	12.3601	-1.61314	94.5482	-0.123397
5.46267	68.5527	12.359	-1.61247	94.5397	-0.123345
5.471	68.6328	12.3579	-1.6118	94.5313	-0.123294
5.47933	68.7137	12.3568	-1.61114	94.523	-0.123244
5.48767	68.8043	12.3556	-1.61048	94.514	-0.123193
5.496	68.8871	12.3545	-1.60985	94.5052	-0.123145
5.50433	68.9607	12.3533	-1.6092	94.4962	-0.123096
5.51267	69.0464	12.3521	-1.60863	94.4874	-0.123051
5.521	69.1304	12.351	-1.608	94.4788	-0.123004
5.52933	69.2138	12.3499	-1.6074	94.4703	-0.122957
5.53767	69.2959	12.3488	-1.60682	94.4616	-0.122913
5.546	69.3846	12.3476	-1.60626	94.4525	-0.122871
5.55433	69.4616	12.3464	-1.60573	94.4433	-0.12283
5.56267	69.5476	12.3452	-1.60519	94.434	-0.122788
5.571	69.6283	12.344	-1.60468	94.4252	-0.122749
5.57933	69.7011	12.3428	-1.60418	94.4162	-0.122711
5.58767	69.7847	12.3417	-1.60372	94.4075	-0.122676
5.596	69.8676	12.3406	-1.60323	94.3988	-0.122639
5.60433	69.9515	12.3394	-1.60278	94.3899	-0.122604
5.61267	70.0342	12.3382	-1.60236	94.3809	-0.122572
5.621	70.1182	12.337	-1.60197	94.3717	-0.122542
5.62933	70.2031	12.3359	-1.60152	94.3627	-0.122508
5.63767	70.2797	12.3347	-1.60112	94.354	-0.122478
5.646	70.3684	12.3336	-1.60076	94.3452	-0.12245
5.65433	70.4503	12.3324	-1.60038	94.3363	-0.12242
5.66267	70.5322	12.3313	-1.60001	94.3275	-0.122393
5.671	70.6178	12.3301	-1.59968	94.3184	-0.122367
5.67933	70.6959	12.3289	-1.59933	94.3094	-0.122341
5.68767	70.7833	12.3277	-1.59901	94.3001	-0.122316
5.696	70.8626	12.3265	-1.59871	94.291	-0.122293
5.70433	70.9503	12.3253	-1.59837	94.2823	-0.122267
5.71267	71.0296	12.3242	-1.59812	94.2735	-0.122247
5.721	71.1143	12.323	-1.59787	94.2646	-0.122229
5.72933	71.1912	12.3218	-1.59765	94.2556	-0.122212
5.73767	71.279	12.3206	-1.59739	94.2463	-0.122192
5.746	71.3631	12.3194	-1.59707	94.2371	-0.122167
5.75433	71.4468	12.3182	-1.59677	94.228	-0.122145
5.76267	71.5278	12.3171	-1.59654	94.2189	-0.122126
5.771	71.6113	12.3159	-1.59631	94.21	-0.122109
5.77933	71.6942	12.3147	-1.59608	94.201	-0.122092
5.78767	71.7735	12.3135	-1.59589	94.1917	-0.122077
5.796	71.8587	12.3123	-1.5957	94.1824	-0.122062
5.80433	71.9404	12.311	-1.59549	94.173	-0.122046
5.81267	72.0217	12.3099	-1.59528	94.1638	-0.122031
5.821	72.1051	12.3087	-1.59514	94.1549	-0.12202
5.82933	72.1887	12.3075	-1.59503	94.1459	-0.122011
5.83767	72.2693	12.3063	-1.5949	94.137	-0.122001
5.846	72.3522	12.3051	-1.59478	94.1279	-0.121992
5.85433	72.4378	12.3039	-1.59466	94.1185	-0.121983
5.86267	72.5207	12.3027	-1.59455	94.1091	-0.121975
5.871	72.6023	12.3015	-1.59443	94.1001	-0.121965
5.87933	72.687	12.3003	-1.5943	94.0909	-0.121955
5.88767	72.7708	12.2991	-1.59416	94.0819	-0.121945
5.896	72.8517	12.2979	-1.59404	94.0727	-0.121936
5.90433	72.9392	12.2967	-1.59397	94.0636	-0.12193
5.91267	73.0235	12.2955	-1.5939	94.0544	-0.121925
5.921	73.1038	12.2943	-1.59379	94.045	-0.121917
5.92933	73.1826	12.2931	-1.59371	94.0357	-0.12191
5.93767	73.2692	12.2919	-1.59365	94.0268	-0.121906
5.946	73.3537	12.2907	-1.59362	94.0177	-0.121903
5.95433	73.4306	12.2895	-1.59357	94.0084	-0.1219
5.96267	73.511	12.2883	-1.59353	93.9994	-0.121896
5.971	73.6002	12.2872	-1.59352	93.9903	-0.121896
5.97933	73.6788	12.286	-1.59346	93.9812	-0.121891
5.98767	73.766	12.2848	-1.5934	93.9721	-0.121887
5.996	73.8454	12.2836	-1.59338	93.9629	-0.121885
6.00433	73.9324	12.2824	-1.59339	93.9536	-0.121886
6.01267	74.0168	12.2812	-1.59337	93.9443	-0.121884
6.021	74.0988	12.2799	-1.59333	93.9348	-0.121881
6.02933	74.182	12.2787	-1.59328	93.9255	-0.121878
6.03767	74.2639	12.2775	-1.59326	93.9162	-0.121876
6.046	74.3469	12.2762	-1.59326	93.9067	-0.121876
6.05433	74.4289	12.275	-1.59325	93.8973	-0.121875
6.06267	74.5152	12.2738	-1.59327	93.8878	-0.121877
6.071	74.5967	12.2725	-1.59329	93.8784	-0.121878
6.07933	74.6783	12.2713	-1.59329	93.8689	-0.121878
6.08767	74.7643	12.2701	-1.59325	93.8598	-0.121875
6.096	74.8456	12.2689	-1.59326	93.8504	-0.121876
6.10433	74.9258	12.2677	-1.5933	93.8411	-0.121879
6.11267	75.0069	12.2664	-1.59335	93.8316	-0.121883
6.121	75.0947	12.2652	-1.59339	93.8223	-0.121886
6.12933	75.1766	12.264	-1.59345	93.8128	-0.121891
6.13767	75.2566	12.2627	-1.59347	93.8033	-0.121892
6.146	75.3408	12.2615	-1.59351	93.7939	-0.121895
6.15433	75.4293	12.2602	-1.59354	93.7843	-0.121898
6.16267	75.51	12.259	-1.59361	93.7749	-0.121903
6.171	75.5972	12.2577	-1.5937	93.7651	-0.12191
6.17933	75.6742	12.2565	-1.59379	93.7558	-0.121917
6.18767	75.7612	12.2553	-1.59384	93.7466	-0.121921
6.196	75.8447	12.2541	-1.59389	93.7373	-0.121924
6.20433	75.9299	12.2529	-1.59396	93.7278	-0.121929
6.21267	76.0087	12.2516	-1.59402	93.7183	-0.121934
6.221	76.0913	12.2504	-1.59413	93.7091	-0.121942
6.22933	76.1757	12.2492	-1.59425	93.6996	-0.121951
6.23767	76.2563	12.2479	-1.5944	93.6903	-0.121963
6.246	76.3465	12.2467	-1.59451	93.6808	-0.121972
6.25433	76.4236	12.2455	-1.5946	93.6717	-0.121978
6.26267	76.5066	12.2443	-1.59471	93.6623	-0.121987
6.271	76.5923	12.243	-1.59482	93.6527	-0.121996
6.27933	76.6762	12.2418	-1.59493	93.6433	-0.122004
6.28767	76.7588	12.2406	-1.59505	93.6339	-0.122013
6.296	76.8387	12.2394	-1.59519	93.6246	-0.122024
6.30433	76.9264	12.2382	-1.59532	93.6154	-0.122034
6.31267	77.0064	12.2369	-1.59542	93.6061	-0.122041
6.321	77.0934	12.2357	-1.59555	93.5966	-0.122051
6.32933	77.1792	12.2345	-1.59567	93.5871	-0.12206
6.33767	77.2612	12.2332	-1.59581	93.5777	-0.122071
6.346	77.3423	12.232	-1.59591	93.5682	-0.122079
6.35433	77.4295	12.2307	-1.59607	93.5587	-0.122091
6.36267	77.5083	12.2295	-1.59625	93.5492	-0.122105
6.371	77.5917	12.2282	-1.59638	93.5395	-0.122115
6.37933	77.6731	12.227	-1.59653	93.5297	-0.122126
6.38767	77.7549	12.2257	-1.59668	93.5198	-0.122137
6.396	77.8408	12.2244	-1.59684	93.5102	-0.12215
6.40433	77.9248	12.2231	-1.59698	93.5004	-0.122161
6.41267	78.002	12.2219	-1.59714	93.4908	-0.122172
6.421	78.0887	12.2206	-1.59733	93.481	-0.122187
6.42933	78.1732	12.2193	-1.59752	93.4715	-0.122202
6.43767	78.2547	12.2181	-1.59768	93.4618	-0.122214
6.446	78.3411	12.2168	-1.59781	93.4521	-0.122224
6.45433	78.4207	12.2156	-1.59801	93.4425	-0.122239
6.46267	78.5044	12.2143	-1.59819	93.4329	-0.122253
6.471	78.594	12.213	-1.59841	93.4233	-0.12227
6.47933	78.6766	12.2118	-1.59859	93.4135	-0.122283
6.48767	78.7574	12.2105	-1.59879	93.404	-0.122299
6.496	78.8418	12.2093	-1.59898	93.3946	-0.122313
6.50433	78.9211	12.208	-1.59916	93.385	-0.122327
6.51267	79.0047	12.2068	-1.59936	93.3756	-0.122343
6.521	79.0882	12.2055	-1.59962	93.3659	-0.122363
6.52933	79.1728	12.2043	-1.59994	93.3563	-0.122387
6.53767	79.2532	12.203	-1.60022	93.3468	-0.122408
6.546	79.3365	12.2018	-1.60046	93.3373	-0.122427
6.55433	79.4233	12.2005	-1.60066	93.3277	-0.122442
6.56267	79.5058	12.1993	-1.60091	93.3184	-0.122461
6.571	79.5862	12.198	-1.60114	93.3085	-0.122479
6.57933	79.6702	12.1968	-1.60139	93.2988	-0.122498
6.58767	79.7559	12.1955	-1.60164	93.289	-0.122517
6.596	79.832	12.1942	-1.6019	93.2792	-0.122537
6.60433	79.9199	12.1929	-1.60212	93.2693	-0.122554
6.61267	80.0049	12.1916	-1.60233	93.2595	-0.12257
6.621	80.0872	12.1904	-1.60254	93.2497	-0.122586
6.62933	80.1711	12.189	-1.60276	93.2398	-0.122602
6.63767	80.2563	12.1878	-1.60301	93.23	-0.122622
6.646	80.3389	12.1865	-1.60326	93.2201	-0.122641
6.65433	80.4201	12.1852	-1.60353	93.2104	-0.122662
6.66267	80.5036	12.1839	-1.60383	93.2006	-0.122684
6.671	80.5866	12.1826	-1.60414	93.1907	-0.122708
6.67933	80.6735	12.1814	-1.60444	93.1809	-0.122731
6.68767	80.7524	12.1801	-1.60474	93.1713	-0.122754
6.696	80.839	12.1789	-1.60503	93.1618	-0.122776
6.70433	80.9119	12.1776	-1.60532	93.152	-0.122799
6.71267	80.9984	12.1763	-1.60563	93.1424	-0.122822
6.721	81.0836	12.1751	-1.60589	93.1327	-0.122842
6.72933	81.1656	12.1738	-1.60618	93.1229	-0.122864
6.73767	81.2514	12.1725	-1.6065	93.113	-0.122889
6.746	81.3326	12.1712	-1.60676	93.1033	-0.122909
6.75433	81.4121	12.1699	-1.60702	93.0935	-0.122929
6.76267	81.4976	12.1687	-1.60731	93.0838	-0.122951
6.771	81.581	12.1674	-1.60759	93.0739	-0.122972
6.77933	81.6613	12.1661	-1.60786	93.0639	-0.122993
6.78767	81.7481	12.1648	-1.60811	93.054	-0.123012
6.796	81.8309	12.1635	-1.60839	93.0442	-0.123034
6.80433	81.9113	12.1622	-1.60871	93.0344	-0.123057
6.81267	81.9987	12.1609	-1.60897	93.0245	-0.123078
6.821	82.0779	12.1596	-1.60921	93.0147	-0.123096
6.82933	82.1616	12.1583	-1.60947	93.0047	-0.123116
6.83767	82.2483	12.1571	-1.60973	92.9952	-0.123136
6.846	82.3348	12.1558	-1.60999	92.9855	-0.123155
6.85433	82.4166	12.1545	-1.61022	92.9758	-0.123173
6.86267	82.4985	12.1532	-1.61047	92.9659	-0.123192
6.871	82.5826	12.152	-1.61076	92.9563	-0.123214
6.87933	82.6609	12.1507	-1.61103	92.9464	-0.123235
6.88767	82.7476	12.1494	-1.61129	92.9365	-0.123256
6.896	82.8316	12.1481	-1.61158	92.9267	-0.123277
6.90433	82.9141	12.1468	-1.61183	92.9169	-0.123297
6.91267	82.9985	12.1456	-1.61208	92.9072	-0.123315
6.921	83.077	12.1443	-1.61233	92.8973	-0.123335
6.92933	83.1607	12.143	-1.61262	92.8873	-0.123357
6.93767	83.2459	12.1417	-1.6129	92.8773	-0.123378
6.946	83.33	12.1404	-1.61316	92.8676	-0.123399
6.95433	83.4129	12.1391	-1.61343	92.8576	-0.123419
6.96267	83.4968	12.1378	-1.61366	92.8479	-0.123436
6.971	83.5842	12.1366	-1.6139	92.8383	-0.123454
6.97933	83.6664	12.1353	-1.61409	92.8285	-0.123469
6.98767	83.7466	12.134	-1.61428	92.8187	-0.123484
6.996	83.8291	12.1327	-1.61451	92.8091	-0.123501
7.00433	83.9104	12.1315	-1.61474	92.7993	-0.123519
7.01267	83.9981	12.1302	-1.61493	92.7897	-0.123533
7.021	84.0803	12.1289	-1.61512	92.78	-0.123548
7.02933	84.161	12.1277	-1.61527	92.7705	-0.12356
7.03767	84.242	12.1265	-1.61544	92.7609	-0.123572
7.046	84.3266	12.1252	-1.61559	92.7512	-0.123584
7.05433	84.4117	12.1239	-1.61573	92.7416	-0.123595
7.06267	84.4929	12.1227	-1.61587	92.7321	-0.123606
7.071	84.5761	12.1214	-1.61605	92.7226	-0.123619
7.07933	84.662	12.1202	-1.61616	92.7128	-0.123628
7.08767	84.7483	12.1189	-1.61621	92.703	-0.123632
7.096	84.8262	12.1176	-1.61628	92.6931	-0.123637
7.10433	84.9108	12.1163	-1.61635	92.6834	-0.123643
7.11267	84.9981	12.115	-1.61646	92.6736	-0.123651
7.121	85.0788	12.1138	-1.61655	92.6639	-0.123658
7.12933	85.1603	12.1125	-1.61662	92.6544	-0.123663
7.13767	85.2431	12.1113	-1.61671	92.6447	-0.12367
7.146	85.3262	12.11	-1.61678	92.635	-0.123675
7.15433	85.4115	12.1087	-1.61681	92.6253	-0.123678
7.16267	85.4938	12.1075	-1.61687	92.6157	-0.123682
7.171	85.5727	12.1062	-1.61692	92.6061	-0.123686
7.17933	85.6611	12.105	-1.61697	92.5967	-0.123689
7.18767	85.7459	12.1037	-1.61696	92.5872	-0.123689
7.196	85.8324	12.1025	-1.61696	92.5778	-0.123689
7.20433	85.9172	12.1013	-1.61693	92.5683	-0.123686
7.21267	85.9946	12.1	-1.61693	92.5586	-0.123687
7.221	86.0777	12.0987	-1.61691	92.549	-0.123685
7.22933	86.163	12.0975	-1.61688	92.5392	-0.123682
7.23767	86.2429	12.0962	-1.61686	92.5294	-0.123682
7.246	86.328	12.0949	-1.61683	92.5197	-0.123679
7.25433	86.4113	12.0937	-1.61679	92.5102	-0.123676
7.26267	86.5003	12.0924	-1.61669	92.5006	-0.123668
7.271	86.578	12.0912	-1.61664	92.4911	-0.123664
7.27933	86.6591	12.0899	-1.61659	92.4814	-0.123661
7.28767	86.7461	12.0886	-1.61652	92.4718	-0.123656
7.296	86.8253	12.0874	-1.61642	92.4623	-0.123648
7.30433	86.9086	12.0862	-1.61631	92.4527	-0.12364
7.31267	86.9929	12.0849	-1.61621	92.4435	-0.123632
7.321	87.0746	12.0838	-1.61606	92.4344	-0.12362
7.32933	87.1591	12.0825	-1.61592	92.4249	-0.123609
7.33767	87.235	12.0813	-1.61579	92.4154	-0.123599
7.346	87.3213	12.08	-1.61569	92.4059	-0.123592
7.35433	87.4066	12.0788	-1.61554	92.3964	-0.12358
7.36267	87.4856	12.0776	-1.61536	92.3872	-0.123566
7.371	87.5761	12.0763	-1.61518	92.3776	-0.123552
7.37933	87.6561	12.0751	-1.615	92.368	-0.123539
7.38767	87.7392	12.0739	-1.61482	92.3586	-0.123525
7.396	87.8313	12.0726	-1.61466	92.3492	-0.123513
7.40433	87.9058	12.0714	-1.6145	92.3398	-0.1235
7.41267	87.9956	12.0702	-1.61434	92.3306	-0.123488
7.421	88.0776	12.069	-1.61413	92.3215	-0.123472
7.42933	88.1581	12.0678	-1.61392	92.3121	-0.123456
7.43767	88.2436	12.0666	-1.6137	92.3029	-0.12344
7.446	88.3286	12.0654	-1.61348	92.2937	-0.123423
7.45433	88.4081	12.0642	-1.61327	92.2847	-0.123407
7.46267	88.4918	12.063	-1.61306	92.2755	-0.123391
7.471	88.5775	12.0618	-1.61285	92.2662	-0.123374
7.47933	88.6628	12.0606	-1.61259	92.2569	-0.123355
7.48767	88.7445	12.0594	-1.61235	92.2477	-0.123336
7.496	88.8261	12.0582	-1.6121	92.2386	-0.123317
7.50433	88.9099	12.057	-1.61187	92.2294	-0.1233
7.51267	88.9907	12.0557	-1.61161	92.2201	-0.12328
7.521	89.077	12.0546	-1.61133	92.2109	-0.123259
7.52933	89.1568	12.0533	-1.61111	92.2015	-0.123241
7.53767	89.2416	12.0521	-1.61085	92.1922	-0.123221
7.546	89.3219	12.0509	-1.61055	92.183	-0.123198
7.55433	89.4091	12.0497	-1.61029	92.174	-0.123179
7.56267	89.4902	12.0485	-1.61003	92.1647	-0.123159
7.571	89.5758	12.0473	-1.60976	92.1553	-0.123138
7.57933	89.6607	12.0461	-1.60951	92.1461	-0.123119
7.58767	89.7429	12.0449	-1.60919	92.1368	-0.123095
7.596	89.8264	12.0437	-1.60893	92.1278	-0.123075
7.60433	89.9072	12.0425	-1.60869	92.1184	-0.123056
7.61267	89.9914	12.0412	-1.60843	92.1091	-0.123036
7.621	90.078	12.04	-1.60814	92.0998	-0.123014
7.62933	90.1668	12.0388	-1.60786	92.0907	-0.122993
7.63767	90.2454	12.0376	-1.6075	92.0813	-0.122965
7.646	90.3214	12.0364	-1.60717	92.0723	-0.12294
7.65433	90.4084	12.0352	-1.60689	92.0631	-0.122918
7.66267	90.4908	12.034	-1.60655	92.0538	-0.122893
7.671	90.5701	12.0328	-1.60627	92.0445	-0.122871
7.67933	90.6578	12.0316	-1.60593	92.0351	-0.122845
7.68767	90.7375	12.0304	-1.60557	92.026	-0.122818
7.696	90.8247	12.0292	-1.60525	92.0169	-0.122793
7.70433	90.9041	12.028	-1.60494	92.0079	-0.122769
7.71267	90.9814	12.0268	-1.6046	91.9987	-0.122743
7.721	91.0704	12.0256	-1.60427	91.9896	-0.122718
7.72933	91.1541	12.0244	-1.60395	91.9804	-0.122694
7.73767	91.2365	12.0232	-1.60355	91.9713	-0.122663
7.746	91.3231	12.0221	-1.60319	91.9624	-0.122636
7.75433	91.4074	12.0209	-1.60284	91.9534	-0.122609
7.76267	91.4888	12.0197	-1.60251	91.9445	-0.122583
7.771	91.5716	12.0185	-1.60214	91.9353	-0.122555
7.77933	91.6576	12.0173	-1.60172	91.9261	-0.122523
7.78767	91.7391	12.0161	-1.60129	91.917	-0.122491
7.796	91.8239	12.015	-1.60093	91.908	-0.122462
7.80433	91.9048	12.0138	-1.60058	91.8992	-0.122436
7.81267	91.9876	12.0126	-1.60019	91.8902	-0.122406
7.821	92.0643	12.0114	-1.59986	91.8811	-0.122381
7.82933	92.1516	12.0102	-1.59949	91.8721	-0.122352
7.83767	92.2376	12.0091	-1.59908	91.863	-0.122321
7.846	92.3188	12.0079	-1.5987	91.8542	-0.122292
7.85433	92.4043	12.0068	-1.59833	91.8454	-0.122264
7.86267	92.4871	12.0056	-1.59798	91.8365	-0.122237
7.871	92.5693	12.0044	-1.59762	91.8275	-0.122209
7.87933	92.652	12.0032	-1.59724	91.8185	-0.12218
7.88767	92.738	12.0021	-1.59686	91.8093	-0.122151
7.896	92.8174	12.0009	-1.59646	91.8006	-0.122121
7.90433	92.9061	11.9998	-1.59606	91.7917	-0.12209
7.91267	92.9855	11.9986	-1.59567	91.7829	-0.122061
7.921	93.0677	11.9974	-1.59529	91.7738	-0.122031
7.92933	93.1528	11.9962	-1.59487	91.765	-0.121999
7.93767	93.2376	11.9951	-1.59444	91.756	-0.121967
7.946	93.3234	11.9939	-1.594	91.7472	-0.121932
7.95433	93.4061	11.9928	-1.59357	91.7384	-0.1219
7.96267	93.4888	11.9916	-1.59316	91.7298	-0.121868
7.971	93.5757	11.9905	-1.59273	91.721	-0.121835
7.97933	93.6558	11.9893	-1.59229	91.712	-0.121802
7.98767	93.7382	11.9882	-1.59181	91.7032	-0.121765
7.996	93.8212	11.987	-1.59135	91.6944	-0.12173
8.00433	93.9028	11.9859	-1.59088	91.6858	-0.121694
8.01267	93.9919	11.9848	-1.5904	91.677	-0.121657
8.021	94.0723	11.9836	-1.58994	91.6683	-0.121622
8.02933	94.1565	11.9824	-1.58951	91.6592	-0.121589
8.03767	94.2422	11.9813	-1.58903	91.6504	-0.121552
8.046	94.3228	11.9801	-1.58855	91.6415	-0.121516
8.05433	94.4075	11.979	-1.58807	91.6328	-0.121479
8.06267	94.4924	11.9778	-1.58763	91.6239	-0.121445
8.071	94.5745	11.9767	-1.58715	91.6152	-0.121409
8.07933	94.6571	11.9755	-1.58662	91.6064	-0.121368
8.08767	94.7442	11.9744	-1.58612	91.5975	-0.12133
8.096	94.8281	11.9732	-1.58563	91.5886	-0.121293
8.10433	94.9052	11.972	-1.58513	91.5796	-0.121254
8.11267	94.9915	11.9709	-1.5846	91.5711	-0.121213
8.121	95.0755	11.9698	-1.58408	91.5626	-0.121174
8.12933	95.1608	11.9687	-1.58354	91.5538	-0.121132
8.13767	95.2393	11.9675	-1.583	91.5449	-0.121091
8.146	95.3243	11.9663	-1.58244	91.5361	-0.121049
8.15433	95.4044	11.9652	-1.58191	91.5271	-0.121008
8.16267	95.4911	11.964	-1.58138	91.5186	-0.120967
8.171	95.5765	11.9629	-1.58086	91.5099	-0.120927
8.17933	95.6563	11.9618	-1.58032	91.5012	-0.120886
8.18767	95.7406	11.9606	-1.57974	91.4925	-0.120842
8.196	95.8275	11.9595	-1.57918	91.4835	-0.120799
8.20433	95.9102	11.9583	-1.57859	91.4747	-0.120754
8.21267	95.9914	11.9572	-1.578	91.4659	-0.120709
8.221	96.0757	11.956	-1.57743	91.4574	-0.120665
8.22933	96.1578	11.9549	-1.57683	91.449	-0.120619
8.23767	96.2437	11.9538	-1.57624	91.4405	-0.120574
8.246	96.3226	11.9527	-1.57566	91.4318	-0.12053
8.25433	96.4101	11.9516	-1.57505	91.4231	-0.120483
8.26267	96.4922	11.9504	-1.57444	91.4143	-0.120436
8.271	96.5767	11.9493	-1.57382	91.406	-0.120389
8.27933	96.6603	11.9482	-1.57318	91.3977	-0.12034
8.28767	96.743	11.9471	-1.57254	91.3893	-0.120291
8.296	96.8272	11.946	-1.57191	91.381	-0.120243
8.30433	96.9137	11.945	-1.57126	91.3728	-0.120193
8.31267	96.9959	11.9439	-1.57062	91.3644	-0.120144
8.321	97.0827	11.9428	-1.56996	91.3559	-0.120093
8.32933	97.1619	11.9417	-1.56925	91.3476	-0.120039
8.33767	97.246	11.9406	-1.56861	91.3393	-0.11999
8.346	97.3329	11.9395	-1.5679	91.3311	-0.119936
8.35433	97.4136	11.9384	-1.56721	91.3225	-0.119883
8.36267	97.4965	11.9373	-1.56653	91.314	-0.119831
8.371	97.5815	11.9362	-1.56586	91.3056	-0.11978
8.37933	97.6614	11.9351	-1.5651	91.2973	-0.119722
8.38767	97.7437	11.934	-1.56435	91.2888	-0.119664
8.396	97.8307	11.9329	-1.56359	91.2804	-0.119607
8.40433	97.9163	11.9318	-1.56281	91.272	-0.119546
8.41267	98.0006	11.9307	-1.56204	91.2637	-0.119488
8.421	98.0877	11.9297	-1.56118	91.2556	-0.119422
8.42933	98.1716	11.9286	-1.56033	91.2476	-0.119357
8.43767	98.2549	11.9276	-1.55949	91.2397	-0.119292
8.446	98.3355	11.9266	-1.55862	91.2318	-0.119226
8.45433	98.4205	11.9255	-1.55772	91.2236	-0.119158
8.46267	98.5065	11.9244	-1.55683	91.2154	-0.119089
8.471	98.5909	11.9234	-1.5559	91.2074	-0.119018
8.47933	98.6776	11.9223	-1.55494	91.1994	-0.118945
8.48767	98.7583	11.9213	-1.55398	91.1916	-0.118871
8.496	98.8412	11.9203	-1.553	91.1837	-0.118797
8.50433	98.9266	11.9192	-1.55204	91.1758	-0.118723
8.51267	99.0087	11.9182	-1.55107	91.1678	-0.118648
8.521	99.0949	11.9171	-1.55006	91.1597	-0.118571
8.52933	99.18	11.9161	-1.54901	91.1519	-0.118491
8.53767	99.2621	11.9151	-1.54793	91.1441	-0.118408
8.546	99.3457	11.9141	-1.54684	91.1366	-0.118325
8.55433	99.434	11.9131	-1.54574	91.1288	-0.118241
8.56267	99.5134	11.9121	-1.54465	91.121	-0.118158
8.571	99.5996	11.9111	-1.54355	91.1133	-0.118073
8.57933	99.6851	11.9101	-1.54244	91.1057	-0.117988
8.58767	99.7675	11.9091	-1.54129	91.0982	-0.1179
8.596	99.8538	11.9081	-1.54013	91.0909	-0.117812
8.60433	99.9361	11.9072	-1.53896	91.0835	-0.117723
8.61267	100.021	11.9062	-1.53775	91.0761	-0.117629
8.621	100.104	11.9052	-1.53655	91.0688	-0.117538
8.62933	100.187	11.9042	-1.53536	91.0612	-0.117447
8.63767	100.277	11.9033	-1.53414	91.0539	-0.117354
8.646	100.359	11.9023	-1.53291	91.0466	-0.11726
8.65433	100.443	11.9014	-1.53165	91.0393	-0.117163
8.66267	100.528	11.9005	-1.53034	91.0322	-0.117063
8.671	100.614	11.8995	-1.52905	91.0249	-0.116964
8.67933	100.695	11.8985	-1.52773	91.0175	-0.116864
8.68767	100.784	11.8976	-1.5264	91.0102	-0.116762
8.696	100.865	11.8966	-1.52504	91.0029	-0.116658
8.70433	100.949	11.8957	-1.52366	90.9957	-0.116552
8.71267	101.04	11.8947	-1.52226	90.9885	-0.116445
8.721	101.12	11.8938	-1.52087	90.9814	-0.116338
8.72933	101.205	11.8929	-1.51947	90.9742	-0.116231
8.73767	101.29	11.892	-1.51802	90.9673	-0.116121
8.746	101.375	11.891	-1.51658	90.96	-0.11601
8.75433	101.463	11.8901	-1.51512	90.953	-0.115899
8.76267	101.546	11.8892	-1.51368	90.9463	-0.115789
8.771	101.629	11.8883	-1.51225	90.9392	-0.115679
8.77933	101.712	11.8874	-1.5108	90.9321	-0.115568
8.78767	101.797	11.8865	-1.50934	90.9252	-0.115456
8.796	101.88	11.8856	-1.50788	90.9186	-0.115345
8.80433	101.968	11.8848	-1.50639	90.912	-0.115231
8.81267	102.054	11.8839	-1.50485	90.9052	-0.115113
8.821	102.14	11.8829	-1.50336	90.8983	-0.114999
8.82933	102.224	11.882	-1.50187	90.8914	-0.114885
8.83767	102.307	11.8811	-1.50035	90.8844	-0.114769
8.846	102.397	11.8802	-1.49879	90.8774	-0.114649
8.85433	102.48	11.8793	-1.49722	90.8707	-0.114529
8.86267	102.564	11.8785	-1.49568	90.8642	-0.114411
8.871	102.648	11.8776	-1.49413	90.8574	-0.114293
8.87933	102.732	11.8767	-1.49259	90.8506	-0.114175
8.88767	102.819	11.8758	-1.49104	90.8439	-0.114057
8.896	102.907	11.875	-1.48951	90.8372	-0.11394
8.90433	102.987	11.8741	-1.48793	90.8306	-0.113819
8.91267	103.073	11.8732	-1.48635	90.824	-0.113698
8.921	103.156	11.8724	-1.48476	90.8174	-0.113576
8.92933	103.242	11.8715	-1.48316	90.8108	-0.113454
8.93767	103.328	11.8707	-1.48156	90.8043	-0.113331
8.946	103.412	11.8698	-1.47996	90.7978	-0.113209
8.95433	103.493	11.869	-1.47836	90.7913	-0.113087
8.96267	103.584	11.8681	-1.4767	90.7848	-0.11296
8.971	103.67	11.8673	-1.475	90.7783	-0.11283
8.97933	103.751	11.8664	-1.47335	90.772	-0.112704
8.98767	103.833	11.8656	-1.47172	90.7658	-0.112579
8.996	103.917	11.8648	-1.47005	90.7593	-0.112451
9.00433	104.005	11.864	-1.4684	90.753	-0.112325
9.01267	104.09	11.8632	-1.46676	90.7469	-0.112199
9.021	104.173	11.8624	-1.46512	90.7408	-0.112074
9.02933	104.258	11.8615	-1.4635	90.7343	-0.11195
9.03767	104.342	11.8607	-1.46184	90.7281	-0.111823
9.046	104.433	11.8599	-1.46021	90.7217	-0.111698
9.05433	104.513	11.859	-1.4586	90.7155	-0.111575
9.06267	104.598	11.8582	-1.45696	90.7092	-0.111449
9.071	104.685	11.8574	-1.45531	90.7029	-0.111324
9.07933	104.771	11.8566	-1.45372	90.6969	-0.111202
9.08767	104.853	11.8558	-1.45212	90.6909	-0.111079
9.096	104.942	11.855	-1.45049	90.6845	-0.110955
9.10433	105.019	11.8542	-1.44886	90.6783	-0.11083
9.11267	105.106	11.8534	-1.44719	90.6722	-0.110702
9.121	105.19	11.8526	-1.44553	90.6661	-0.110576
9.12933	105.28	11.8518	-1.44391	90.6601	-0.110451
9.13767	105.36	11.851	-1.44227	90.6538	-0.110326
9.146	105.444	11.8502	-1.44067	90.6475	-0.110204
9.15433	105.533	11.8493	-1.43902	90.6411	-0.110077
9.16267	105.62	11.8485	-1.43733	90.6348	-0.109948
9.171	105.7	11.8477	-1.43569	90.6286	-0.109823
9.17933	105.786	11.8469	-1.43403	90.6224	-0.109696
9.18767	105.872	11.8461	-1.43238	90.6164	-0.109569
9.196	105.956	11.8453	-1.43071	90.6104	-0.109442
9.20433	106.039	11.8445	-1.42908	90.6042	-0.109317
9.21267	106.128	11.8437	-1.42742	90.5981	-0.10919
9.221	106.211	11.8429	-1.42579	90.5921	-0.109065
9.22933	106.299	11.8421	-1.42413	90.5861	-0.108938
9.23767	106.382	11.8414	-1.42253	90.5803	-0.108816
9.246	106.465	11.8406	-1.42093	90.5743	-0.108694
9.25433	106.547	11.8398	-1.41926	90.5685	-0.108566
9.26267	106.636	11.8391	-1.41765	90.5626	-0.108442
9.271	106.722	11.8383	-1.41605	90.5565	-0.10832
9.27933	106.805	11.8375	-1.41445	90.5505	-0.108198
9.28767	106.89	11.8367	-1.41282	90.5447	-0.108073
9.296	106.975	11.836	-1.41125	90.539	-0.107953
9.30433	107.061	11.8352	-1.40965	90.533	-0.107831
9.31267	107.144	11.8344	-1.40804	90.5271	-0.107707
9.321	107.23	11.8337	-1.40639	90.5215	-0.107582
9.32933	107.312	11.833	-1.40476	90.5159	-0.107457
9.33767	107.409	11.8322	-1.40317	90.5101	-0.107335
9.346	107.489	11.8314	-1.40156	90.5043	-0.107212
9.35433	107.579	11.8307	-1.39994	90.4984	-0.107088
9.36267	107.658	11.8299	-1.39836	90.4927	-0.106967
9.371	107.743	11.8292	-1.39679	90.4869	-0.106847
9.37933	107.828	11.8284	-1.39518	90.4812	-0.106724
9.38767	107.913	11.8277	-1.39357	90.4754	-0.106601
9.396	107.998	11.8269	-1.39198	90.4698	-0.106479
9.40433	108.081	11.8262	-1.39042	90.4639	-0.106359
9.41267	108.168	11.8254	-1.38888	90.4579	-0.106242
9.421	108.25	11.8246	-1.38733	90.4521	-0.106123
9.42933	108.338	11.8238	-1.38579	90.446	-0.106005
9.43767	108.425	11.8231	-1.38423	90.4402	-0.105886
9.446	108.504	11.8223	-1.38269	90.434	-0.105768
9.45433	108.591	11.8215	-1.38119	90.4282	-0.105653
9.46267	108.674	11.8207	-1.37966	90.4223	-0.105537
9.471	108.758	11.82	-1.37813	90.4166	-0.105419
9.47933	108.844	11.8192	-1.37659	90.4108	-0.105302
9.48767	108.93	11.8185	-1.37505	90.4051	-0.105184
9.496	109.014	11.8178	-1.3735	90.3996	-0.105066
9.50433	109.102	11.817	-1.37197	90.3939	-0.104948
9.51267	109.184	11.8163	-1.37044	90.3884	-0.104831
9.521	109.269	11.8156	-1.36892	90.3831	-0.104715
9.52933	109.35	11.8149	-1.36734	90.3777	-0.104595
9.53767	109.436	11.8142	-1.36578	90.3722	-0.104475
9.546	109.528	11.8135	-1.36424	90.3667	-0.104357
9.55433	109.607	11.8127	-1.36275	90.3612	-0.104243
9.56267	109.694	11.812	-1.36122	90.3559	-0.104126
9.571	109.777	11.8113	-1.35967	90.3503	-0.104008
9.57933	109.864	11.8106	-1.35813	90.3446	-0.103889
9.58767	109.948	11.8099	-1.3566	90.3392	-0.103773
9.596	110.034	11.8091	-1.35509	90.3335	-0.103657
9.60433	110.118	11.8084	-1.35358	90.3279	-0.103542
9.61267	110.202	11.8077	-1.3521	90.3223	-0.103428
9.621	110.286	11.8069	-1.35058	90.3168	-0.103312
9.62933	110.371	11.8062	-1.34909	90.3113	-0.103198
9.63767	110.458	11.8055	-1.34759	90.3059	-0.103084
9.646	110.545	11.8048	-1.34613	90.3002	-0.102972
9.65433	110.629	11.8041	-1.34474	90.2947	-0.102865
9.66267	110.717	11.8034	-1.3433	90.2894	-0.102756
9.671	110.795	11.8026	-1.34188	90.284	-0.102647
9.67933	110.883	11.802	-1.34044	90.2787	-0.102536
9.68767	110.968	11.8013	-1.339	90.2735	-0.102426
9.696	111.052	11.8006	-1.33759	90.2683	-0.102319
9.70433	111.14	11.7999	-1.33618	90.263	-0.102211
9.71267	111.225	11.7992	-1.33475	90.2575	-0.102101
9.721	111.312	11.7985	-1.33333	90.252	-0.101992
9.72933	111.392	11.7978	-1.33193	90.2466	-0.101886
9.73767	111.482	11.7971	-1.3305	90.2412	-0.101776
9.746	111.566	11.7964	-1.3291	90.2358	-0.101669
9.75433	111.648	11.7956	-1.32772	90.2304	-0.101564
9.76267	111.736	11.7949	-1.32635	90.2249	-0.101459
9.771	111.82	11.7942	-1.32498	90.2196	-0.101354
9.77933	111.908	11.7935	-1.32358	90.2141	-0.101247
9.78767	111.993	11.7928	-1.32218	90.2086	-0.10114
9.796	112.077	11.7921	-1.32077	90.2032	-0.101032
9.80433	112.161	11.7914	-1.31938	90.198	-0.100926
9.81267	112.245	11.7907	-1.31802	90.1928	-0.100822
9.821	112.327	11.79	-1.31666	90.1874	-0.100718
9.82933	112.413	11.7893	-1.31531	90.1822	-0.100614
9.83767	112.499	11.7887	-1.31394	90.1772	-0.100509
9.846	112.581	11.788	-1.31255	90.1721	-0.100403
9.85433	112.661	11.7873	-1.31117	90.1666	-0.100298
9.86267	112.752	11.7866	-1.30982	90.1613	-0.100194
9.871	112.836	11.7859	-1.30847	90.1559	-0.100091
9.87933	112.924	11.7852	-1.30716	90.1505	-0.0999911
9.88767	113.008	11.7845	-1.30586	90.1453	-0.0998911
9.896	113.09	11.7838	-1.30449	90.1401	-0.0997863
9.90433	113.175	11.7831	-1.30312	90.1348	-0.0996818
9.91267	113.26	11.7824	-1.30178	90.1294	-0.099579
9.921	113.341	11.7817	-1.30047	90.124	-0.0994791
9.92933	113.432	11.781	-1.29919	90.1186	-0.0993811
9.93767	113.512	11.7803	-1.29791	90.1134	-0.0992836
9.946	113.6	11.7797	-1.29663	90.1081	-0.0991857
9.95433	113.684	11.779	-1.29538	90.103	-0.0990894
9.96267	113.764	11.7783	-1.29412	90.098	-0.0989936
9.971	113.856	11.7776	-1.29286	90.0926	-0.0988972
9.97933	113.935	11.7769	-1.29159	90.0874	-0.0987996
9.98767	114.022	11.7763	-1.29035	90.0822	-0.0987053
9.996	114.103	11.7756	-1.28908	90.077	-0.0986081
10.0043	114.19	11.7749	-1.28781	90.0718	-0.098511
10.0127	114.275	11.7742	-1.28655	90.0667	-0.0984143
10.021	114.362	11.7736	-1.28527	90.0617	-0.0983164
10.0293	114.45	11.7729	-1.28401	90.0567	-0.0982204
10.0377	114.528	11.7722	-1.28277	90.0515	-0.0981254
10.046	114.614	11.7716	-1.2815	90.0462	-0.098028
10.0543	114.698	11.7709	-1.28024	90.0411	-0.0979316
10.0627	114.783	11.7702	-1.27904	90.0358	-0.0978396
10.071	114.866	11.7695	-1.27779	90.0307	-0.097744
10.0793	114.95	11.7689	-1.27658	90.0256	-0.0976515
10.0877	115.038	11.7682	-1.27531	90.0203	-0.0975548
10.096	115.119	11.7675	-1.27404	90.0151	-0.0974575
10.1043	115.208	11.7668	-1.27284	90.0099	-0.0973653
10.1127	115.292	11.7662	-1.27165	90.0049	-0.0972748
10.121	115.375	11.7655	-1.27046	89.9998	-0.0971833
10.1293	115.46	11.7648	-1.26925	89.9949	-0.0970906
10.1377	115.545	11.7642	-1.26806	89.9899	-0.0969999
10.146	115.631	11.7636	-1.26687	89.985	-0.0969092
10.1543	115.716	11.7629	-1.2657	89.9799	-0.0968192
10.1627	115.8	11.7622	-1.26453	89.9749	-0.0967301
10.171	115.883	11.7616	-1.26339	89.97	-0.0966423
10.1793	115.974	11.7609	-1.26225	89.9649	-0.0965556
10.1877	116.053	11.7603	-1.26109	89.9598	-0.0964664
10.196	116.134	11.7596	-1.25992	89.9547	-0.0963772
10.2043	116.218	11.7589	-1.25878	89.9497	-0.0962897
10.2127	116.308	11.7583	-1.25766	89.9447	-0.0962046
10.221	116.389	11.7576	-1.25652	89.9398	-0.0961168
10.2293	116.475	11.757	-1.25537	89.9348	-0.0960292
10.2377	116.561	11.7563	-1.25425	89.9296	-0.0959431
10.246	116.643	11.7556	-1.25309	89.9243	-0.0958551
10.2543	116.731	11.755	-1.25199	89.9194	-0.0957708
10.2627	116.819	11.7544	-1.25087	89.9147	-0.0956852
10.271	116.899	11.7537	-1.24978	89.9098	-0.0956012
10.2793	116.985	11.7531	-1.24865	89.9048	-0.0955147
10.2877	117.068	11.7524	-1.24751	89.8999	-0.0954282
10.296	117.153	11.7518	-1.24639	89.8949	-0.0953419
10.3043	117.241	11.7511	-1.24527	89.8897	-0.0952566
10.3127	117.325	11.7504	-1.24416	89.8846	-0.0951719
10.321	117.405	11.7498	-1.24309	89.8797	-0.0950896
10.3293	117.493	11.7492	-1.24202	89.8749	-0.0950076
10.3377	117.578	11.7485	-1.2409	89.8697	-0.0949224
10.346	117.659	11.7478	-1.23982	89.8643	-0.0948396
10.3543	117.747	11.7471	-1.23872	89.8592	-0.0947552
10.3627	117.834	11.7464	-1.23766	89.8541	-0.0946746
10.371	117.911	11.7458	-1.23659	89.8492	-0.0945922
10.3793	117.997	11.7452	-1.23555	89.8443	-0.0945127
10.3877	118.082	11.7445	-1.23449	89.8394	-0.0944321
10.396	118.17	11.7439	-1.23343	89.8344	-0.0943508
10.4043	118.257	11.7432	-1.23235	89.8296	-0.0942683
10.4127	118.337	11.7426	-1.2313	89.8248	-0.0941881
10.421	118.421	11.742	-1.2303	89.8199	-0.0941114
10.4293	118.511	11.7414	-1.22927	89.8153	-0.0940324
10.4377	118.593	11.7408	-1.22826	89.8108	-0.0939552
10.446	118.676	11.7401	-1.22726	89.8059	-0.0938788
10.4543	118.757	11.7395	-1.22626	89.801	-0.093802
10.4627	118.844	11.7388	-1.22524	89.796	-0.0937243
10.471	118.923	11.7383	-1.22424	89.7914	-0.0936477
10.4793	119.012	11.7376	-1.22325	89.7866	-0.0935719
10.4877	119.094	11.737	-1.22226	89.7818	-0.0934961
10.496	119.18	11.7363	-1.22127	89.7768	-0.0934206
10.5043	119.261	11.7357	-1.22026	89.7719	-0.0933431
10.5127	119.349	11.735	-1.21927	89.7668	-0.0932675
10.521	119.435	11.7344	-1.21827	89.7618	-0.0931915
10.5293	119.52	11.7338	-1.21727	89.757	-0.0931146
10.5377	119.606	11.7331	-1.21632	89.7522	-0.0930417
10.546	119.686	11.7325	-1.21537	89.7473	-0.0929691
10.5543	119.772	11.7318	-1.21441	89.7422	-0.0928957
10.5627	119.857	11.7311	-1.21345	89.7371	-0.0928229
10.571	119.942	11.7305	-1.21254	89.7321	-0.0927526
10.5793	120.022	11.7299	-1.21161	89.7272	-0.0926816
10.5877	120.107	11.7293	-1.21071	89.7226	-0.0926133
10.596	120.192	11.7286	-1.20978	89.7176	-0.0925418
10.6043	120.278	11.7279	-1.20888	89.7125	-0.0924726
10.6127	120.36	11.7273	-1.20801	89.7076	-0.0924062
10.621	120.446	11.7267	-1.20711	89.7027	-0.0923375
10.6293	120.53	11.726	-1.20619	89.6979	-0.0922674
10.6377	120.616	11.7254	-1.20531	89.6933	-0.0921998
10.646	120.702	11.7248	-1.20443	89.6888	-0.0921324
10.6543	120.787	11.7242	-1.20354	89.6843	-0.0920647
10.6627	120.871	11.7236	-1.20265	89.6796	-0.0919964
10.671	120.953	11.723	-1.20176	89.6747	-0.091928
10.6793	121.037	11.7224	-1.20094	89.6701	-0.0918652
10.6877	121.121	11.7218	-1.2001	89.6655	-0.0918013
10.696	121.206	11.7212	-1.19923	89.6607	-0.091735
10.7043	121.285	11.7205	-1.19837	89.656	-0.091669
10.7127	121.374	11.7199	-1.19752	89.6513	-0.0916042
10.721	121.459	11.7193	-1.19668	89.6467	-0.09154
10.7293	121.541	11.7187	-1.19586	89.6419	-0.0914768
10.7377	121.624	11.718	-1.19502	89.6367	-0.0914126
10.746	121.71	11.7174	-1.1942	89.6318	-0.0913497
10.7543	121.796	11.7168	-1.19337	89.6271	-0.0912863
10.7627	121.882	11.7162	-1.19251	89.6223	-0.0912211
10.771	121.964	11.7155	-1.19168	89.6176	-0.0911572
10.7793	122.05	11.7149	-1.19085	89.6129	-0.0910939
10.7877	122.13	11.7143	-1.19003	89.6082	-0.091031
10.796	122.213	11.7136	-1.18924	89.6032	-0.0909704
10.8043	122.299	11.713	-1.18842	89.5982	-0.0909081
10.8127	122.382	11.7124	-1.18764	89.5936	-0.0908481
10.821	122.464	11.7118	-1.18687	89.589	-0.090789
10.8293	122.548	11.7112	-1.18606	89.5845	-0.0907275
10.8377	122.637	11.7106	-1.18527	89.5798	-0.0906667
10.846	122.716	11.71	-1.18449	89.5751	-0.0906075
10.8543	122.802	11.7094	-1.18372	89.5704	-0.0905484
10.8627	122.892	11.7087	-1.18295	89.5655	-0.0904894
10.871	122.974	11.7081	-1.1822	89.5608	-0.0904319
10.8793	123.056	11.7075	-1.18144	89.5561	-0.0903739
10.8877	123.146	11.7069	-1.18068	89.5514	-0.0903158
10.896	123.226	11.7062	-1.17994	89.5465	-0.0902593
10.9043	123.31	11.7056	-1.17919	89.5419	-0.0902021
10.9127	123.393	11.705	-1.17848	89.5371	-0.0901472
10.921	123.479	11.7044	-1.1778	89.5322	-0.0900953
10.9293	123.563	11.7038	-1.1771	89.5276	-0.0900419
10.9377	123.647	11.7032	-1.17635	89.5229	-0.0899842
10.946	123.728	11.7025	-1.17563	89.5181	-0.0899298
10.9543	123.814	11.7019	-1.17492	89.5134	-0.0898752
10.9627	123.902	11.7013	-1.1742	89.5086	-0.0898199
10.971	123.983	11.7007	-1.17348	89.5039	-0.0897653
10.9793	124.067	11.7	-1.17273	89.499	-0.0897079
10.9877	124.153	11.6994	-1.17201	89.4941	-0.0896526
10.996	124.237	11.6988	-1.1713	89.4895	-0.0895986
11.0043	124.319	11.6982	-1.17057	89.485	-0.089542
11.0127	124.404	11.6975	-1.16984	89.48	-0.0894863
11.021	124.487	11.6969	-1.16916	89.475	-0.0894345
11.0293	124.573	11.6963	-1.16847	89.4704	-0.089382
11.0377	124.651	11.6957	-1.16775	89.4656	-0.0893269
11.046	124.741	11.6951	-1.16707	89.461	-0.0892743
11.0543	124.822	11.6945	-1.16641	89.4566	-0.0892242
11.0627	124.907	11.6939	-1.16578	89.4522	-0.0891763
11.071	124.994	11.6933	-1.16512	89.4477	-0.0891256
11.0793	125.073	11.6927	-1.16447	89.443	-0.0890757
11.0877	125.161	11.6921	-1.1638	89.4384	-0.0890242
11.096	125.243	11.6915	-1.16315	89.434	-0.0889751
11.1043	125.336	11.691	-1.1625	89.4296	-0.0889249
11.1127	125.411	11.6904	-1.16182	89.4251	-0.0888733
11.121	125.495	11.6898	-1.16118	89.4206	-0.0888243
11.1293	125.582	11.6892	-1.16054	89.416	-0.0887751
11.1377	125.666	11.6885	-1.15987	89.4111	-0.0887236
11.146	125.751	11.6879	-1.15919	89.4062	-0.0886721
11.1543	125.83	11.6873	-1.15857	89.4016	-0.0886245
11.1627	125.915	11.6867	-1.15791	89.3969	-0.0885738
11.171	126.001	11.686	-1.15727	89.392	-0.088525
11.1793	126.083	11.6854	-1.15664	89.3873	-0.088477
11.1877	126.168	11.6848	-1.15599	89.3825	-0.0884272
11.196	126.252	11.6842	-1.15537	89.3777	-0.0883799
11.2043	126.337	11.6836	-1.15475	89.373	-0.0883324
11.2127	126.42	11.6829	-1.15413	89.3684	-0.0882851
11.221	126.503	11.6823	-1.15354	89.3637	-0.0882399
11.2293	126.587	11.6817	-1.15295	89.3592	-0.0881943
11.2377	126.67	11.6811	-1.15231	89.3545	-0.0881458
11.246	126.757	11.6806	-1.15172	89.35	-0.0881004
11.2543	126.84	11.68	-1.15112	89.3455	-0.0880545
11.2627	126.929	11.6793	-1.15051	89.3408	-0.0880081
11.271	127.009	11.6787	-1.14993	89.3362	-0.0879639
11.2793	127.095	11.6781	-1.14933	89.3316	-0.0879178
11.2877	127.18	11.6775	-1.14873	89.327	-0.0878718
11.296	127.258	11.6769	-1.14811	89.3224	-0.0878242
11.3043	127.347	11.6763	-1.14748	89.3179	-0.0877764
11.3127	127.429	11.6758	-1.14688	89.3134	-0.0877299
11.321	127.515	11.6752	-1.14629	89.3089	-0.0876849
11.3293	127.6	11.6746	-1.14568	89.3042	-0.0876388
11.3377	127.68	11.6739	-1.14509	89.2995	-0.0875932
11.346	127.768	11.6733	-1.14449	89.2949	-0.0875477
11.3543	127.849	11.6727	-1.14394	89.2902	-0.0875054
11.3627	127.929	11.6721	-1.14335	89.2854	-0.0874599
11.371	128.016	11.6715	-1.14276	89.2807	-0.0874152
11.3793	128.102	11.6709	-1.14219	89.2761	-0.0873715
11.3877	128.186	11.6703	-1.14165	89.2715	-0.08733
11.396	128.268	11.6697	-1.14107	89.2669	-0.0872858
11.4043	128.347	11.6691	-1.1405	89.2622	-0.0872423
11.4127	128.432	11.6684	-1.13994	89.2573	-0.0871995
11.421	128.515	11.6678	-1.13938	89.2526	-0.0871567
11.4293	128.602	11.6672	-1.13884	89.2481	-0.0871149
11.4377	128.686	11.6666	-1.13825	89.2435	-0.0870703
11.446	128.767	11.6661	-1.13773	89.2391	-0.0870299
11.4543	128.855	11.6654	-1.13717	89.2344	-0.0869878
11.4627	128.939	11.6648	-1.13663	89.2296	-0.0869463
11.471	129.024	11.6642	-1.1361	89.2249	-0.0869056
11.4793	129.105	11.6636	-1.13557	89.2201	-0.0868654
11.4877	129.189	11.663	-1.13502	89.2156	-0.0868229
11.496	129.273	11.6624	-1.13447	89.2112	-0.0867809
11.5043	129.357	11.6618	-1.13393	89.2065	-0.0867395
11.5127	129.442	11.6612	-1.13339	89.202	-0.0866983
11.521	129.525	11.6606	-1.13287	89.1974	-0.0866583
11.5293	129.609	11.66	-1.13231	89.1928	-0.0866155
11.5377	129.694	11.6594	-1.13178	89.1882	-0.0865752
11.546	129.777	11.6588	-1.13127	89.1837	-0.0865362
11.5543	129.862	11.6582	-1.13073	89.1791	-0.0864947
11.5627	129.946	11.6576	-1.13018	89.1745	-0.0864531
11.571	130.029	11.657	-1.12965	89.17	-0.0864126
11.5793	130.114	11.6564	-1.12913	89.1654	-0.0863722
11.5877	130.197	11.6558	-1.12861	89.161	-0.0863325
11.596	130.277	11.6553	-1.12804	89.1566	-0.0862892
11.6043	130.362	11.6547	-1.12749	89.152	-0.0862473
11.6127	130.444	11.6541	-1.12698	89.1474	-0.0862077
11.621	130.526	11.6535	-1.12645	89.1428	-0.0861678
11.6293	130.613	11.6529	-1.12591	89.1384	-0.0861258
11.6377	130.696	11.6523	-1.12537	89.1338	-0.0860848
11.646	130.784	11.6517	-1.12483	89.1294	-0.0860438
11.6543	130.869	11.6511	-1.1243	89.1247	-0.0860032
11.6627	130.95	11.6505	-1.12376	89.1205	-0.0859614
11.671	131.034	11.6499	-1.1232	89.1158	-0.0859189
11.6793	131.115	11.6493	-1.12271	89.1111	-0.0858811
11.6877	131.198	11.6488	-1.12218	89.1068	-0.0858412
11.696	131.283	11.6482	-1.12167	89.1024	-0.0858018
11.7043	131.368	11.6476	-1.12114	89.098	-0.0857614
11.7127	131.45	11.647	-1.12064	89.0934	-0.0857234
11.721	131.537	11.6464	-1.12012	89.0889	-0.0856833
11.7293	131.62	11.6458	-1.1196	89.0843	-0.0856435
11.7377	131.704	11.6452	-1.1191	89.0798	-0.0856055
11.746	131.783	11.6446	-1.11864	89.075	-0.08557
11.7543	131.871	11.6441	-1.11816	89.0708	-0.0855336
11.7627	131.954	11.6435	-1.11767	89.0665	-0.0854957
11.771	132.04	11.6429	-1.11714	89.0618	-0.0854554
11.7793	132.123	11.6423	-1.11662	89.0572	-0.0854157
11.7877	132.204	11.6417	-1.11613	89.0527	-0.0853778
11.796	132.289	11.6411	-1.1156	89.0483	-0.0853372
11.8043	132.377	11.6405	-1.11509	89.044	-0.0852982
11.8127	132.457	11.64	-1.11458	89.0395	-0.0852595
11.821	132.541	11.6394	-1.11406	89.0351	-0.08522
11.8293	132.628	11.6388	-1.11352	89.0307	-0.0851781
11.8377	132.709	11.6382	-1.11296	89.0261	-0.0851358
11.846	132.791	11.6376	-1.11244	89.0216	-0.0850955
11.8543	132.876	11.637	-1.11194	89.0172	-0.0850575
11.8627	132.962	11.6365	-1.11141	89.0129	-0.0850168
11.871	133.038	11.6359	-1.1109	89.0086	-0.0849777
11.8793	133.129	11.6353	-1.11041	89.0041	-0.0849404
11.8877	133.21	11.6347	-1.10991	88.9994	-0.0849025
11.896	133.293	11.6341	-1.10939	88.9949	-0.0848627
11.9043	133.375	11.6335	-1.10889	88.9903	-0.0848239
11.9127	133.461	11.633	-1.10839	88.986	-0.0847863
11.921	133.543	11.6324	-1.10791	88.9815	-0.0847493
11.9293	133.626	11.6318	-1.10738	88.9771	-0.084709
11.9377	133.712	11.6312	-1.10687	88.9726	-0.0846698
11.946	133.798	11.6306	-1.10639	88.9681	-0.0846333
11.9543	133.882	11.63	-1.10584	88.9636	-0.0845908
11.9627	133.963	11.6295	-1.10528	88.9594	-0.0845483
11.971	134.048	11.6289	-1.10472	88.9552	-0.0845051
11.9793	134.131	11.6284	-1.1042	88.951	-0.0844651
11.9877	134.214	11.6278	-1.10363	88.9467	-0.0844222
11.996	134.301	11.6272	-1.10307	88.9422	-0.0843789
12.0043	134.383	11.6266	-1.10251	88.9376	-0.0843362
12.0127	134.464	11.6261	-1.10195	88.9333	-0.0842936
12.021	134.55	11.6255	-1.10139	88.9288	-0.0842509
12.0293	134.632	11.6249	-1.10081	88.9244	-0.0842064
12.0377	134.719	11.6243	-1.10025	88.92	-0.0841636
12.046	134.805	11.6238	-1.09969	88.9156	-0.0841205
12.0543	134.887	11.6232	-1.09916	88.9111	-0.0840795
12.0627	134.967	11.6226	-1.09859	88.9066	-0.0840362
12.071	135.054	11.622	-1.09802	88.9021	-0.0839929
12.0793	135.136	11.6214	-1.09745	88.8976	-0.0839488
12.0877	135.225	11.6209	-1.09687	88.8934	-0.0839048
12.096	135.308	11.6203	-1.09632	88.8891	-0.0838628
12.1043	135.391	11.6197	-1.09576	88.8849	-0.0838201
12.1127	135.474	11.6192	-1.09519	88.8806	-0.0837762
12.121	135.562	11.6186	-1.09463	88.8764	-0.0837337
12.1293	135.641	11.6181	-1.09405	88.8722	-0.0836889
12.1377	135.726	11.6175	-1.09344	88.8676	-0.0836425
12.146	135.814	11.6169	-1.09282	88.8635	-0.083595
12.1543	135.896	11.6164	-1.09221	88.8595	-0.0835486
12.1627	135.978	11.6159	-1.09162	88.8553	-0.0835029
12.171	136.068	11.6153	-1.09099	88.8511	-0.083455
12.1793	136.15	11.6148	-1.09033	88.847	-0.0834044
12.1877	136.233	11.6142	-1.08968	88.8428	-0.0833547
12.196	136.319	11.6137	-1.08906	88.8385	-0.0833076
12.2043	136.402	11.6131	-1.08843	88.8342	-0.0832591
12.2127	136.487	11.6126	-1.0878	88.8302	-0.0832109
12.221	136.572	11.6121	-1.08714	88.8261	-0.0831606
12.2293	136.652	11.6115	-1.08651	88.8217	-0.0831123
12.2377	136.734	11.6109	-1.08588	88.8175	-0.0830644
12.246	136.818	11.6104	-1.08523	88.8133	-0.0830145
12.2543	136.9	11.6098	-1.0846	88.8091	-0.082966
12.2627	136.985	11.6093	-1.08397	88.805	-0.0829181
12.271	137.071	11.6088	-1.08334	88.8008	-0.0828695
12.2793	137.154	11.6082	-1.08268	88.7967	-0.0828191
12.2877	137.235	11.6077	-1.08201	88.7926	-0.0827682
12.296	137.318	11.6071	-1.08134	88.7885	-0.0827169
12.3043	137.407	11.6066	-1.08069	88.7844	-0.0826668
12.3127	137.492	11.6061	-1.08003	88.7805	-0.0826164
12.321	137.577	11.6055	-1.07936	88.7763	-0.0825656
12.3293	137.66	11.605	-1.07872	88.7723	-0.0825163
12.3377	137.744	11.6045	-1.07806	88.7681	-0.0824657
12.346	137.829	11.6039	-1.07736	88.7639	-0.0824127
12.3543	137.918	11.6034	-1.07668	88.7599	-0.0823603
12.3627	137.999	11.6029	-1.07597	88.7559	-0.0823063
12.371	138.083	11.6024	-1.07529	88.7519	-0.0822544
12.3793	138.166	11.6018	-1.0746	88.7478	-0.0822009
12.3877	138.252	11.6013	-1.07389	88.7437	-0.0821466
12.396	138.334	11.6007	-1.07317	88.7395	-0.0820921
12.4043	138.42	11.6002	-1.07247	88.7355	-0.0820386
12.4127	138.501	11.5997	-1.07176	88.7316	-0.0819837
12.421	138.585	11.5992	-1.07102	88.7278	-0.0819277
12.4293	138.667	11.5987	-1.07033	88.724	-0.0818749
12.4377	138.752	11.5982	-1.06963	88.7203	-0.0818207
12.446	138.841	11.5977	-1.06892	88.7164	-0.0817671
12.4543	138.921	11.5972	-1.06819	88.7124	-0.0817107
12.4627	139.007	11.5967	-1.06749	88.7087	-0.0816576
12.471	139.09	11.5962	-1.06679	88.705	-0.0816036
12.4793	139.175	11.5957	-1.06608	88.7012	-0.0815497
12.4877	139.261	11.5953	-1.06533	88.6975	-0.081492
12.496	139.344	11.5948	-1.06459	88.694	-0.0814359
12.5043	139.429	11.5943	-1.06386	88.6903	-0.08138
12.5127	139.514	11.5938	-1.0631	88.6866	-0.0813218
12.521	139.597	11.5933	-1.06235	88.6828	-0.0812638
12.5293	139.679	11.5928	-1.06159	88.6791	-0.0812057
12.5377	139.764	11.5924	-1.06083	88.6754	-0.0811481
12.546	139.846	11.5919	-1.06007	88.6717	-0.0810898
12.5543	139.932	11.5914	-1.05932	88.6678	-0.0810324
12.5627	140.018	11.5909	-1.05856	88.664	-0.0809746
12.571	140.1	11.5904	-1.05781	88.6601	-0.0809169
12.5793	140.185	11.5898	-1.05704	88.6561	-0.0808583
12.5877	140.273	11.5893	-1.05634	88.6521	-0.0808045
12.596	140.355	11.5888	-1.05562	88.6483	-0.0807496
12.6043	140.435	11.5883	-1.05491	88.6444	-0.0806947
12.6127	140.523	11.5878	-1.05417	88.6405	-0.0806381
12.621	140.607	11.5873	-1.05344	88.6367	-0.0805826
12.6293	140.693	11.5868	-1.05269	88.6329	-0.0805254
12.6377	140.778	11.5863	-1.05192	88.6292	-0.0804661
12.646	140.864	11.5858	-1.05116	88.6255	-0.080408
12.6543	140.946	11.5853	-1.05042	88.6217	-0.0803516
12.6627	141.029	11.5848	-1.04966	88.6178	-0.0802931
12.671	141.114	11.5843	-1.04885	88.6141	-0.0802317
12.6793	141.195	11.5838	-1.04805	88.6103	-0.0801704
12.6877	141.28	11.5834	-1.04723	88.6066	-0.0801079
12.696	141.367	11.5829	-1.04644	88.6027	-0.0800472
12.7043	141.452	11.5824	-1.04564	88.599	-0.0799858
12.7127	141.535	11.5819	-1.04484	88.5954	-0.0799247
12.721	141.618	11.5814	-1.04407	88.5917	-0.079866
12.7293	141.699	11.581	-1.04329	88.5882	-0.0798064
12.7377	141.785	11.5805	-1.04251	88.5845	-0.0797462
12.746	141.868	11.58	-1.04173	88.5808	-0.0796867
12.7543	141.956	11.5795	-1.04093	88.5772	-0.0796253
12.7627	142.039	11.579	-1.04015	88.5735	-0.0795658
12.771	142.125	11.5786	-1.03937	88.57	-0.0795062
12.7793	142.21	11.5781	-1.03858	88.5665	-0.0794456
12.7877	142.293	11.5777	-1.0378	88.5631	-0.0793858
12.796	142.379	11.5772	-1.03701	88.5593	-0.0793255
12.8043	142.462	11.5767	-1.03623	88.5556	-0.0792664
12.8127	142.546	11.5762	-1.03546	88.5519	-0.0792073
12.821	142.632	11.5758	-1.0347	88.5484	-0.0791489
12.8293	142.717	11.5753	-1.03392	88.545	-0.0790898
12.8377	142.802	11.5748	-1.03314	88.5415	-0.07903
12.846	142.889	11.5744	-1.03236	88.5379	-0.0789705
12.8543	142.971	11.5739	-1.03157	88.5342	-0.0789099
12.8627	143.052	11.5734	-1.03081	88.5306	-0.0788514
12.871	143.143	11.5729	-1.03006	88.5267	-0.0787943
12.8793	143.225	11.5725	-1.02935	88.5232	-0.0787398
12.8877	143.309	11.572	-1.0286	88.5196	-0.0786825
12.896	143.39	11.5716	-1.02781	88.5163	-0.0786219
12.9043	143.476	11.5711	-1.027	88.5128	-0.0785604
12.9127	143.56	11.5706	-1.02623	88.5092	-0.0785009
12.921	143.642	11.5701	-1.02549	88.5054	-0.0784443
12.9293	143.729	11.5697	-1.02473	88.5019	-0.0783865
12.9377	143.815	11.5692	-1.024	88.4985	-0.0783304
12.946	143.898	11.5687	-1.02321	88.4947	-0.0782705
12.9543	143.985	11.5683	-1.02244	88.4914	-0.0782113
12.9627	144.065	11.5678	-1.02166	88.4879	-0.0781513
12.971	144.149	11.5674	-1.02084	88.4846	-0.0780889
12.9793	144.234	11.567	-1.02004	88.4811	-0.0780278
12.9877	144.315	11.5665	-1.0193	88.4774	-0.0779711
12.996	144.402	11.566	-1.01856	88.4739	-0.0779144
13.0043	144.484	11.5656	-1.01779	88.4706	-0.0778553
13.0127	144.57	11.5651	-1.01701	88.467	-0.0777957
13.021	144.649	11.5647	-1.0162	88.4635	-0.0777336
13.0293	144.74	11.5642	-1.01542	88.46	-0.0776745
13.0377	144.818	11.5638	-1.01466	88.4566	-0.0776158
13.046	144.906	11.5633	-1.01387	88.4533	-0.077556
13.0543	144.987	11.5628	-1.01312	88.4497	-0.0774984
13.0627	145.072	11.5624	-1.01238	88.4461	-0.0774417
13.071	145.157	11.562	-1.01157	88.443	-0.07738
13.0793	145.242	11.5615	-1.0108	88.4394	-0.0773209
13.0877	145.327	11.5611	-1.01003	88.4361	-0.077262
13.096	145.41	11.5607	-1.00923	88.4331	-0.0772007
13.1043	145.494	11.5602	-1.00846	88.4298	-0.077142
13.1127	145.581	11.5598	-1.00774	88.4263	-0.0770869
13.121	145.663	11.5593	-1.00697	88.4228	-0.077028
13.1293	145.748	11.5589	-1.0062	88.4192	-0.0769691
13.1377	145.831	11.5584	-1.00544	88.4159	-0.0769111
13.146	145.911	11.558	-1.00468	88.4126	-0.0768528
13.1543	146	11.5576	-1.00398	88.4092	-0.0767992
13.1627	146.085	11.5571	-1.0032	88.406	-0.0767394
13.171	146.167	11.5567	-1.0024	88.4026	-0.0766783
13.1793	146.253	11.5562	-1.00162	88.3991	-0.0766187
13.1877	146.333	11.5558	-1.00087	88.3958	-0.0765616
13.196	146.417	11.5554	-1.00007	88.3925	-0.0765001
13.2043	146.499	11.5549	-0.999298	88.3892	-0.076441
13.2127	146.587	11.5545	-0.998543	88.3861	-0.0763833
13.221	146.671	11.5541	-0.997773	88.3827	-0.0763244
13.2293	146.758	11.5536	-0.997022	88.3792	-0.0762669
13.2377	146.838	11.5532	-0.996239	88.3756	-0.076207
13.246	146.924	11.5527	-0.995473	88.372	-0.0761484
13.2543	147.007	11.5523	-0.994777	88.3688	-0.0760952
13.2627	147.096	11.5518	-0.994089	88.3655	-0.0760426
13.271	147.173	11.5514	-0.993351	88.3621	-0.0759861
13.2793	147.258	11.551	-0.992612	88.359	-0.0759296
13.2877	147.341	11.5506	-0.99187	88.3557	-0.0758728
13.296	147.429	11.5501	-0.991115	88.3522	-0.0758151
13.3043	147.516	11.5497	-0.990363	88.3488	-0.0757575
13.3127	147.6	11.5492	-0.989629	88.3456	-0.0757014
13.321	147.686	11.5488	-0.988906	88.3426	-0.0756461
13.3293	147.768	11.5484	-0.988181	88.3395	-0.0755906
13.3377	147.85	11.548	-0.9874	88.3365	-0.0755309
13.346	147.934	11.5476	-0.986654	88.3333	-0.0754738
13.3543	148.019	11.5472	-0.985928	88.3301	-0.0754183
13.3627	148.101	11.5468	-0.985212	88.327	-0.0753635
13.371	148.187	11.5464	-0.984464	88.3239	-0.0753063
13.3793	148.273	11.546	-0.983727	88.3207	-0.0752499
13.3877	148.361	11.5456	-0.983017	88.3176	-0.0751956
13.396	148.44	11.5452	-0.982302	88.3144	-0.0751409
13.4043	148.529	11.5448	-0.98156	88.3113	-0.0750841
13.4127	148.607	11.5443	-0.980827	88.308	-0.075028
13.421	148.692	11.5439	-0.980104	88.3047	-0.0749728
13.4293	148.775	11.5434	-0.979375	88.3013	-0.074917
13.4377	148.857	11.543	-0.978632	88.2978	-0.0748602
13.446	148.941	11.5426	-0.977875	88.2945	-0.0748023
13.4543	149.03	11.5421	-0.977162	88.2912	-0.0747477
13.4627	149.112	11.5417	-0.97647	88.2881	-0.0746948
13.471	149.198	11.5413	-0.975754	88.2852	-0.0746401
13.4793	149.281	11.541	-0.974996	88.2822	-0.074582
13.4877	149.367	11.5405	-0.974265	88.279	-0.0745261
13.496	149.452	11.5401	-0.973542	88.276	-0.0744708
13.5043	149.532	11.5397	-0.972826	88.2727	-0.074416
13.5127	149.613	11.5393	-0.972108	88.2697	-0.0743611
13.521	149.702	11.5389	-0.971422	88.2668	-0.0743087
13.5293	149.784	11.5385	-0.970728	88.2637	-0.0742556
13.5377	149.87	11.5381	-0.970024	88.2607	-0.0742017
13.546	149.954	11.5377	-0.969274	88.2575	-0.0741443
13.5543	150.039	11.5373	-0.968541	88.2541	-0.0740882
13.5627	150.123	11.5369	-0.967855	88.251	-0.0740358
13.571	150.208	11.5365	-0.967152	88.2478	-0.073982
13.5793	150.296	11.536	-0.96644	88.2447	-0.0739276
13.5877	150.379	11.5357	-0.965736	88.2417	-0.0738737
13.596	150.459	11.5352	-0.96502	88.2386	-0.0738189
13.6043	150.541	11.5348	-0.964281	88.2354	-0.0737624
13.6127	150.625	11.5345	-0.963568	88.2325	-0.0737079
13.621	150.715	11.534	-0.962843	88.2293	-0.0736524
13.6293	150.798	11.5336	-0.962146	88.2262	-0.0735991
13.6377	150.88	11.5333	-0.961468	88.2235	-0.0735472
13.646	150.959	11.5329	-0.960759	88.2204	-0.073493
13.6543	151.048	11.5325	-0.960039	88.2173	-0.0734379
13.6627	151.137	11.5321	-0.959322	88.2144	-0.0733831
13.671	151.215	11.5317	-0.958596	88.2112	-0.0733276
13.6793	151.3	11.5313	-0.957915	88.208	-0.0732754
13.6877	151.389	11.5309	-0.957238	88.205	-0.0732236
13.696	151.468	11.5305	-0.956561	88.2018	-0.0731718
13.7043	151.548	11.5301	-0.955849	88.199	-0.0731174
13.7127	151.637	11.5297	-0.955137	88.196	-0.073063
13.721	151.719	11.5293	-0.95443	88.193	-0.0730088
13.7293	151.803	11.5289	-0.95376	88.1899	-0.0729576
13.7377	151.893	11.5285	-0.953068	88.187	-0.0729047
13.746	151.975	11.5281	-0.952403	88.184	-0.0728538
13.7543	152.058	11.5277	-0.951759	88.1812	-0.0728045
13.7627	152.14	11.5274	-0.951087	88.1784	-0.0727531
13.771	152.226	11.527	-0.9504	88.1755	-0.0727006
13.7793	152.31	11.5266	-0.949696	88.1725	-0.0726467
13.7877	152.395	11.5262	-0.94903	88.1694	-0.0725957
13.796	152.474	11.5258	-0.948377	88.1664	-0.0725458
13.8043	152.561	11.5254	-0.947706	88.1632	-0.0724945
13.8127	152.644	11.525	-0.947008	88.1602	-0.0724411
13.821	152.733	11.5246	-0.946348	88.1572	-0.0723906
13.8293	152.815	11.5242	-0.945657	88.1543	-0.0723377
13.8377	152.893	11.5238	-0.944953	88.1513	-0.0722839
13.846	152.982	11.5235	-0.944267	88.1484	-0.0722314
13.8543	153.066	11.5231	-0.943578	88.1453	-0.0721787
13.8627	153.151	11.5227	-0.942912	88.1423	-0.0721278
13.871	153.232	11.5223	-0.942233	88.1393	-0.0720758
13.8793	153.318	11.5219	-0.941527	88.1362	-0.0720219
13.8877	153.402	11.5215	-0.940827	88.1332	-0.0719683
13.896	153.492	11.5211	-0.940134	88.1301	-0.0719153
13.9043	153.572	11.5207	-0.939445	88.127	-0.0718626
13.9127	153.655	11.5203	-0.938797	88.1238	-0.071813
13.921	153.743	11.5198	-0.938141	88.1206	-0.0717628
13.9293	153.826	11.5194	-0.937441	88.1173	-0.0717092
13.9377	153.907	11.519	-0.936773	88.1142	-0.0716582
13.946	153.992	11.5186	-0.936092	88.1113	-0.0716061
13.9543	154.074	11.5183	-0.93543	88.1087	-0.0715555
13.9627	154.156	11.5179	-0.934778	88.1061	-0.0715056
13.971	154.24	11.5176	-0.934126	88.1035	-0.0714557
13.9793	154.327	11.5173	-0.933472	88.101	-0.0714057
13.9877	154.412	11.5169	-0.932819	88.0983	-0.0713557
13.996	154.499	11.5165	-0.932131	88.0954	-0.0713031
14.0043	154.577	11.5162	-0.931448	88.0927	-0.0712508
14.0127	154.661	11.5158	-0.930774	88.0901	-0.0711993
14.021	154.744	11.5155	-0.930118	88.0877	-0.0711491
14.0293	154.833	11.5152	-0.92947	88.085	-0.0710995
14.0377	154.916	11.5148	-0.928811	88.0822	-0.0710491
14.046	155	11.5144	-0.928148	88.0791	-0.0709984
14.0543	155.082	11.514	-0.927497	88.0761	-0.0709486
14.0627	155.17	11.5136	-0.926847	88.0733	-0.0708989
14.071	155.252	11.5133	-0.926187	88.0704	-0.0708484
14.0793	155.334	11.5129	-0.925553	88.0678	-0.0707999
14.0877	155.418	11.5126	-0.924915	88.0653	-0.0707511
14.096	155.501	11.5122	-0.924292	88.0623	-0.0707035
14.1043	155.589	11.5118	-0.923618	88.0592	-0.0706519
14.1127	155.674	11.5114	-0.922977	88.0563	-0.0706028
14.121	155.758	11.5111	-0.922344	88.0535	-0.0705544
14.1293	155.836	11.5107	-0.921713	88.0508	-0.0705062
14.1377	155.926	11.5103	-0.921045	88.048	-0.0704551
14.146	156.005	11.51	-0.920373	88.0451	-0.0704037
14.1543	156.093	11.5096	-0.919727	88.0422	-0.0703542
14.1627	156.176	11.5092	-0.919062	88.0393	-0.0703034
14.171	156.262	11.5088	-0.918398	88.0362	-0.0702526
14.1793	156.341	11.5085	-0.917731	88.0336	-0.0702016
14.1877	156.427	11.5081	-0.917093	88.0312	-0.0701527
14.196	156.507	11.5078	-0.916432	88.0283	-0.0701022
14.2043	156.59	11.5074	-0.915781	88.0253	-0.0700524
14.2127	156.673	11.507	-0.915138	88.0224	-0.0700032
14.221	156.759	11.5066	-0.914504	88.0196	-0.0699547
14.2293	156.847	11.5063	-0.913894	88.0169	-0.069908
14.2377	156.927	11.5059	-0.913281	88.0143	-0.0698612
14.246	157.012	11.5056	-0.912649	88.0117	-0.0698128
14.2543	157.096	11.5052	-0.912013	88.009	-0.0697642
14.2627	157.183	11.5049	-0.911378	88.0062	-0.0697156
14.271	157.27	11.5045	-0.910766	88.0035	-0.0696688
14.2793	157.35	11.5041	-0.910152	88.0007	-0.0696218
14.2877	157.439	11.5038	-0.909513	87.9979	-0.0695729
14.296	157.519	11.5034	-0.908888	87.9952	-0.0695251
14.3043	157.601	11.5031	-0.90828	87.9926	-0.0694786
14.3127	157.688	11.5028	-0.907643	87.99	-0.0694299
14.321	157.776	11.5024	-0.907005	87.9873	-0.0693811
14.3293	157.857	11.502	-0.906399	87.9844	-0.0693347
14.3377	157.942	11.5017	-0.905792	87.9818	-0.0692883
14.346	158.025	11.5013	-0.905214	87.9791	-0.0692441
14.3543	158.109	11.501	-0.904604	87.9763	-0.0691974
14.3627	158.195	11.5006	-0.904008	87.9737	-0.0691518
14.371	158.279	11.5003	-0.903416	87.9713	-0.0691066
14.3793	158.357	11.5	-0.9028	87.9688	-0.0690595
14.3877	158.442	11.4996	-0.90219	87.9661	-0.0690128
14.396	158.532	11.4993	-0.901597	87.9634	-0.0689674
14.4043	158.615	11.4989	-0.900995	87.9608	-0.0689214
14.4127	158.694	11.4986	-0.900379	87.9581	-0.0688743
14.421	158.779	11.4982	-0.899773	87.9554	-0.0688278
14.4293	158.862	11.4979	-0.899172	87.9528	-0.0687819
14.4377	158.952	11.4976	-0.898582	87.9502	-0.0687368
14.446	159.034	11.4972	-0.897958	87.9476	-0.0686891
14.4543	159.117	11.4969	-0.897316	87.945	-0.0686399
14.4627	159.202	11.4965	-0.896712	87.9422	-0.0685937
14.471	159.284	11.4962	-0.896101	87.9395	-0.068547
14.4793	159.366	11.4958	-0.895462	87.9368	-0.0684981
14.4877	159.45	11.4955	-0.894875	87.9342	-0.0684532
14.496	159.53	11.4951	-0.894304	87.9316	-0.0684096
14.5043	159.62	11.4948	-0.893714	87.9288	-0.0683644
14.5127	159.705	11.4944	-0.893089	87.9259	-0.0683166
14.521	159.788	11.494	-0.892458	87.9232	-0.0682683
14.5293	159.867	11.4937	-0.891859	87.9205	-0.0682225
14.5377	159.955	11.4933	-0.891322	87.9177	-0.0681814
14.546	160.039	11.493	-0.890722	87.9151	-0.0681355
14.5543	160.125	11.4926	-0.890157	87.9125	-0.0680923
14.5627	160.205	11.4923	-0.889593	87.9096	-0.0680492
14.571	160.291	11.4919	-0.88899	87.9067	-0.068003
14.5793	160.373	11.4915	-0.888405	87.904	-0.0679583
14.5877	160.462	11.4912	-0.887827	87.9014	-0.0679141
14.596	160.542	11.4908	-0.887268	87.8988	-0.0678713
14.6043	160.626	11.4905	-0.886722	87.8965	-0.0678295
14.6127	160.712	11.4902	-0.886188	87.8939	-0.0677887
14.621	160.794	11.4899	-0.885602	87.8914	-0.0677439
14.6293	160.879	11.4895	-0.885081	87.889	-0.067704
14.6377	160.963	11.4892	-0.88454	87.8862	-0.0676626
14.646	161.049	11.4889	-0.883995	87.8837	-0.0676209
14.6543	161.134	11.4886	-0.883458	87.8813	-0.0675798
14.6627	161.215	11.4883	-0.882916	87.8792	-0.0675384
14.671	161.297	11.488	-0.882398	87.8769	-0.0674988
14.6793	161.382	11.4877	-0.881861	87.8747	-0.0674577
14.6877	161.465	11.4873	-0.881314	87.8721	-0.0674158
14.696	161.55	11.487	-0.880724	87.8695	-0.0673707
14.7043	161.633	11.4867	-0.880173	87.8672	-0.0673286
14.7127	161.716	11.4864	-0.879597	87.8647	-0.0672845
14.721	161.803	11.4861	-0.879024	87.8623	-0.0672407
14.7293	161.886	11.4857	-0.87846	87.8599	-0.0671975
14.7377	161.972	11.4854	-0.877897	87.8571	-0.0671545
14.746	162.052	11.485	-0.877316	87.8542	-0.06711
14.7543	162.136	11.4846	-0.876723	87.8514	-0.0670647
14.7627	162.221	11.4843	-0.87614	87.8486	-0.0670201
14.771	162.303	11.4839	-0.875576	87.8458	-0.066977
14.7793	162.385	11.4836	-0.875046	87.8434	-0.0669364
14.7877	162.47	11.4832	-0.874501	87.8407	-0.0668947
14.796	162.554	11.4829	-0.873946	87.8381	-0.0668522
14.8043	162.639	11.4826	-0.873396	87.8357	-0.0668102
14.8127	162.724	11.4823	-0.872855	87.8331	-0.0667688
14.821	162.808	11.482	-0.872338	87.8309	-0.0667292
14.8293	162.89	11.4817	-0.871812	87.8286	-0.066689
14.8377	162.974	11.4814	-0.871284	87.8263	-0.0666486
14.846	163.057	11.481	-0.870745	87.8237	-0.0666074
14.8543	163.143	11.4807	-0.870211	87.8211	-0.0665665
14.8627	163.225	11.4803	-0.869661	87.8186	-0.0665245
14.871	163.308	11.48	-0.869095	87.8161	-0.0664811
14.8793	163.398	11.4797	-0.86855	87.8135	-0.0664395
14.8877	163.475	11.4793	-0.867998	87.8107	-0.0663973
14.896	163.564	11.479	-0.867454	87.8081	-0.0663556
14.9043	163.646	11.4786	-0.866885	87.8055	-0.0663121
14.9127	163.728	11.4783	-0.866339	87.803	-0.0662704
14.921	163.813	11.478	-0.865818	87.8005	-0.0662305
14.9293	163.899	11.4777	-0.865308	87.7981	-0.0661915
14.9377	163.98	11.4774	-0.864789	87.7957	-0.0661518
14.946	164.066	11.4771	-0.864261	87.7934	-0.0661114
14.9543	164.149	11.4767	-0.863752	87.791	-0.0660724
14.9627	164.234	11.4764	-0.863253	87.7885	-0.0660343
14.971	164.316	11.4761	-0.86276	87.7862	-0.0659966
14.9793	164.397	11.4758	-0.862245	87.7839	-0.0659572
14.9877	164.483	11.4755	-0.861755	87.7813	-0.0659197
14.996	164.569	11.4751	-0.861258	87.7788	-0.0658817
15.0043	164.654	11.4748	-0.860764	87.7762	-0.0658439
15.0127	164.74	11.4745	-0.860276	87.7736	-0.0658065
15.021	164.819	11.4741	-0.859757	87.7711	-0.0657669
15.0293	164.904	11.4738	-0.859243	87.7686	-0.0657275
15.0377	164.991	11.4735	-0.858743	87.7661	-0.0656893
15.046	165.072	11.4732	-0.85821	87.7638	-0.0656485
15.0543	165.158	11.4729	-0.857699	87.7615	-0.0656094
15.0627	165.241	11.4726	-0.857201	87.7589	-0.0655713
15.071	165.327	11.4722	-0.856672	87.7565	-0.0655309
15.0793	165.414	11.4719	-0.856122	87.7539	-0.0654888
15.0877	165.493	11.4715	-0.855566	87.7511	-0.0654463
15.096	165.578	11.4712	-0.855021	87.7487	-0.0654046
15.1043	165.661	11.4709	-0.854503	87.7462	-0.065365
15.1127	165.747	11.4705	-0.853997	87.7436	-0.0653262
15.121	165.833	11.4702	-0.853489	87.7413	-0.0652874
15.1293	165.916	11.4699	-0.852974	87.7388	-0.065248
15.1377	165.999	11.4695	-0.852455	87.736	-0.0652083
15.146	166.081	11.4692	-0.851966	87.7335	-0.0651709
15.1543	166.166	11.4689	-0.851466	87.731	-0.0651327
15.1627	166.251	11.4686	-0.850995	87.7287	-0.0650966
15.171	166.336	11.4684	-0.850478	87.7269	-0.0650571
15.1793	166.421	11.4681	-0.849973	87.7246	-0.0650184
15.1877	166.497	11.4678	-0.849497	87.7224	-0.064982
15.196	166.587	11.4675	-0.84901	87.7202	-0.0649448
15.2043	166.667	11.4672	-0.84851	87.7179	-0.0649065
15.2127	166.753	11.4669	-0.848054	87.7156	-0.0648717
15.221	166.833	11.4666	-0.847553	87.7133	-0.0648333
15.2293	166.922	11.4663	-0.847051	87.711	-0.0647949
15.2377	167.006	11.466	-0.846572	87.7088	-0.0647583
15.246	167.082	11.4657	-0.846091	87.7065	-0.0647215
15.2543	167.169	11.4654	-0.84563	87.7042	-0.0646863
15.2627	167.255	11.4651	-0.845156	87.7017	-0.06465
15.271	167.344	11.4647	-0.844638	87.6992	-0.0646104
15.2793	167.426	11.4644	-0.844146	87.6967	-0.0645727
15.2877	167.511	11.4641	-0.843638	87.6942	-0.0645339
15.296	167.592	11.4638	-0.843134	87.6917	-0.0644953
15.3043	167.679	11.4635	-0.842676	87.6894	-0.0644602
15.3127	167.764	11.4632	-0.842187	87.687	-0.0644228
15.321	167.846	11.4628	-0.841706	87.6847	-0.064386
15.3293	167.928	11.4625	-0.841219	87.6824	-0.0643488
15.3377	168.01	11.4622	-0.84075	87.6801	-0.064313
15.346	168.096	11.462	-0.840293	87.6781	-0.064278
15.3543	168.18	11.4617	-0.839834	87.6758	-0.0642428
15.3627	168.262	11.4614	-0.839353	87.6735	-0.064206
15.371	168.345	11.4611	-0.838892	87.6712	-0.0641708
15.3793	168.434	11.4608	-0.838425	87.6691	-0.0641351
15.3877	168.515	11.4605	-0.837944	87.6668	-0.0640983
15.396	168.599	11.4602	-0.837483	87.6644	-0.064063
15.4043	168.683	11.4599	-0.836982	87.6621	-0.0640247
15.4127	168.77	11.4596	-0.836491	87.6597	-0.0639871
15.421	168.853	11.4593	-0.836002	87.6573	-0.0639497
15.4293	168.939	11.4589	-0.835513	87.6548	-0.0639123
15.4377	169.018	11.4586	-0.835054	87.6525	-0.0638772
15.446	169.105	11.4583	-0.834595	87.6502	-0.0638421
15.4543	169.187	11.458	-0.834143	87.6478	-0.0638075
15.4627	169.27	11.4577	-0.83369	87.6453	-0.0637729
15.471	169.355	11.4574	-0.833218	87.6428	-0.0637367
15.4793	169.44	11.4571	-0.832732	87.6406	-0.0636996
15.4877	169.523	11.4568	-0.832262	87.6382	-0.0636636
15.496	169.607	11.4565	-0.831804	87.6359	-0.0636286
15.5043	169.689	11.4561	-0.831361	87.6333	-0.0635947
15.5127	169.777	11.4558	-0.830907	87.6312	-0.06356
15.521	169.855	11.4555	-0.830445	87.6288	-0.0635247
15.5293	169.944	11.4552	-0.829983	87.6266	-0.0634893
15.5377	170.026	11.455	-0.829538	87.6244	-0.0634552
15.546	170.111	11.4547	-0.82906	87.6225	-0.0634187
15.5543	170.197	11.4545	-0.82858	87.6207	-0.063382
15.5627	170.281	11.4542	-0.828134	87.6186	-0.0633479
15.571	170.365	11.4539	-0.827686	87.6163	-0.0633136
15.5793	170.446	11.4536	-0.827256	87.6141	-0.0632807
15.5877	170.533	11.4533	-0.826801	87.612	-0.0632459
15.596	170.613	11.453	-0.826359	87.6097	-0.0632121
15.6043	170.698	11.4528	-0.825884	87.6076	-0.0631758
15.6127	170.78	11.4525	-0.825422	87.6054	-0.0631404
15.621	170.865	11.4522	-0.824952	87.6033	-0.0631045
15.6293	170.95	11.4519	-0.824502	87.6007	-0.0630701
15.6377	171.04	11.4515	-0.824083	87.5983	-0.063038
15.646	171.119	11.4513	-0.823639	87.5962	-0.0630041
15.6543	171.205	11.451	-0.823199	87.5942	-0.0629704
15.6627	171.29	11.4507	-0.822739	87.5921	-0.0629352
15.671	171.368	11.4505	-0.822294	87.59	-0.0629011
15.6793	171.452	11.4502	-0.821824	87.5878	-0.0628652
15.6877	171.538	11.4499	-0.82137	87.5856	-0.0628305
15.696	171.622	11.4496	-0.82097	87.5835	-0.0627999
15.7043	171.704	11.4494	-0.820546	87.5815	-0.0627674
15.7127	171.792	11.4491	-0.820112	87.5794	-0.0627342
15.721	171.87	11.4488	-0.819667	87.5775	-0.0627002
15.7293	171.956	11.4485	-0.819203	87.5752	-0.0626647
15.7377	172.041	11.4482	-0.818743	87.5729	-0.0626295
15.746	172.124	11.4479	-0.818298	87.5706	-0.0625955
15.7543	172.207	11.4476	-0.817846	87.5682	-0.0625609
15.7627	172.289	11.4473	-0.817416	87.5659	-0.062528
15.771	172.376	11.4471	-0.817005	87.5639	-0.0624966
15.7793	172.458	11.4467	-0.81655	87.5613	-0.0624618
15.7877	172.539	11.4464	-0.816102	87.5589	-0.0624275
15.796	172.627	11.4461	-0.815647	87.5563	-0.0623926
15.8043	172.712	11.4457	-0.815199	87.5536	-0.0623584
15.8127	172.792	11.4454	-0.814783	87.5512	-0.0623266
15.821	172.879	11.4451	-0.814374	87.549	-0.0622953
15.8293	172.962	11.4448	-0.813927	87.547	-0.0622611
15.8377	173.046	11.4446	-0.813507	87.545	-0.062229
15.846	173.132	11.4443	-0.813068	87.5428	-0.0621954
15.8543	173.214	11.444	-0.812629	87.5405	-0.0621618
15.8627	173.299	11.4437	-0.812185	87.5386	-0.0621278
15.871	173.383	11.4435	-0.811764	87.5365	-0.0620956
15.8793	173.468	11.4432	-0.811378	87.5346	-0.0620661
15.8877	173.549	11.443	-0.810938	87.5327	-0.0620325
15.896	173.631	11.4427	-0.810498	87.5309	-0.0619988
15.9043	173.717	11.4424	-0.810043	87.5286	-0.061964
15.9127	173.8	11.4421	-0.809639	87.5264	-0.0619331
15.921	173.886	11.4419	-0.809199	87.5243	-0.0618994
15.9293	173.968	11.4416	-0.808765	87.522	-0.0618662
15.9377	174.052	11.4413	-0.808344	87.5199	-0.0618341
15.946	174.133	11.441	-0.807934	87.5177	-0.0618027
15.9543	174.223	11.4407	-0.807509	87.5155	-0.0617702
15.9627	174.3	11.4404	-0.80706	87.5133	-0.0617358
15.971	174.386	11.4401	-0.806639	87.511	-0.0617036
15.9793	174.467	11.4398	-0.806216	87.5087	-0.0616712
15.9877	174.549	11.4396	-0.805837	87.5065	-0.0616422
15.996	174.641	11.4393	-0.805424	87.5044	-0.0616107
16.0043	174.72	11.439	-0.805036	87.5021	-0.061581
16.0127	174.803	11.4387	-0.804646	87.5002	-0.0615512
16.021	174.892	11.4384	-0.804217	87.498	-0.0615184
16.0293	174.971	11.4381	-0.803782	87.4956	-0.0614851
16.0377	175.061	11.4379	-0.803364	87.4936	-0.0614531
16.046	175.141	11.4376	-0.802969	87.4914	-0.0614229
16.0543	175.224	11.4373	-0.802592	87.4893	-0.061394
16.0627	175.308	11.437	-0.802205	87.4872	-0.0613645
16.071	175.39	11.4368	-0.801768	87.4852	-0.061331
16.0793	175.478	11.4365	-0.801366	87.483	-0.0613003
16.0877	175.559	11.4362	-0.800931	87.4808	-0.061267
16.096	175.642	11.4359	-0.800479	87.4783	-0.0612324
16.1043	175.725	11.4355	-0.800078	87.4759	-0.0612017
16.1127	175.809	11.4353	-0.799675	87.4738	-0.0611709
16.121	175.896	11.435	-0.799272	87.4715	-0.0611401
16.1293	175.981	11.4347	-0.798863	87.4694	-0.0611088
16.1377	176.063	11.4344	-0.798444	87.4673	-0.0610768
16.146	176.148	11.4342	-0.798019	87.4652	-0.0610443
16.1543	176.229	11.4339	-0.797638	87.4631	-0.0610151
16.1627	176.313	11.4336	-0.797223	87.4611	-0.0609833
16.171	176.393	11.4333	-0.796847	87.459	-0.0609546
16.1793	176.48	11.4331	-0.796472	87.457	-0.0609259
16.1877	176.562	11.4329	-0.796072	87.4553	-0.0608953
16.196	176.653	11.4326	-0.795689	87.4534	-0.060866
16.2043	176.73	11.4324	-0.795306	87.4515	-0.0608367
16.2127	176.816	11.4321	-0.794903	87.4494	-0.0608059
16.221	176.897	11.4318	-0.794513	87.4471	-0.060776
16.2293	176.983	11.4315	-0.794123	87.445	-0.0607462
16.2377	177.068	11.4312	-0.793709	87.4429	-0.0607145
16.246	177.153	11.4309	-0.793313	87.4406	-0.0606842
16.2543	177.235	11.4307	-0.792906	87.4387	-0.0606531
16.2627	177.316	11.4305	-0.792521	87.4369	-0.0606237
16.271	177.403	11.4302	-0.792136	87.435	-0.0605942
16.2793	177.483	11.4299	-0.791719	87.4328	-0.0605623
16.2877	177.566	11.4297	-0.791301	87.4308	-0.0605304
16.296	177.649	11.4294	-0.790907	87.4287	-0.0605002
16.3043	177.734	11.4291	-0.790505	87.4267	-0.0604695
16.3127	177.816	11.4288	-0.790114	87.4246	-0.0604396
16.321	177.903	11.4286	-0.789729	87.4226	-0.0604101
16.3293	177.985	11.4283	-0.789352	87.4206	-0.0603813
16.3377	178.067	11.428	-0.78898	87.4185	-0.0603528
16.346	178.153	11.4277	-0.788585	87.4162	-0.0603226
16.3543	178.232	11.4275	-0.788173	87.4141	-0.060291
16.3627	178.316	11.4272	-0.787787	87.4121	-0.0602615
16.371	178.403	11.4269	-0.787395	87.4101	-0.0602315
16.3793	178.486	11.4267	-0.787025	87.4084	-0.0602032
16.3877	178.567	11.4265	-0.786645	87.4068	-0.0601742
16.396	178.653	11.4263	-0.786254	87.4048	-0.0601442
16.4043	178.742	11.426	-0.785846	87.4029	-0.0601131
16.4127	178.82	11.4257	-0.785431	87.4009	-0.0600813
16.421	178.903	11.4255	-0.785037	87.3987	-0.0600512
16.4293	178.989	11.4252	-0.784648	87.3967	-0.0600215
16.4377	179.072	11.4249	-0.784275	87.3947	-0.0599929
16.446	179.158	11.4247	-0.783928	87.3928	-0.0599664
16.4543	179.243	11.4244	-0.783568	87.3906	-0.0599388
16.4627	179.325	11.4241	-0.783153	87.3885	-0.059907
16.471	179.411	11.4238	-0.782773	87.3863	-0.059878
16.4793	179.493	11.4235	-0.782407	87.384	-0.05985
16.4877	179.573	11.4232	-0.782048	87.3817	-0.0598225
16.496	179.658	11.423	-0.781701	87.3798	-0.059796
16.5043	179.746	11.4227	-0.781335	87.3779	-0.059768
16.5127	179.828	11.4225	-0.780972	87.3758	-0.0597402
16.521	179.908	11.4222	-0.780615	87.3735	-0.0597129
16.5293	179.993	11.4218	-0.78024	87.3711	-0.0596842
16.5377	180.076	11.4216	-0.779859	87.369	-0.0596551
16.546	180.162	11.4213	-0.779516	87.3669	-0.0596289
16.5543	180.245	11.421	-0.779117	87.3648	-0.0595983
16.5627	180.328	11.4208	-0.778737	87.3632	-0.0595693
16.571	180.412	11.4206	-0.778358	87.3614	-0.0595403
16.5793	180.495	11.4203	-0.777951	87.3594	-0.0595091
16.5877	180.582	11.4201	-0.777577	87.3575	-0.0594805
16.596	180.661	11.4198	-0.77722	87.3556	-0.0594533
16.6043	180.75	11.4195	-0.776857	87.3535	-0.0594254
16.6127	180.83	11.4193	-0.776462	87.3518	-0.0593952
16.621	180.912	11.4191	-0.776111	87.3498	-0.0593684
16.6293	180.995	11.4188	-0.775763	87.3478	-0.0593417
16.6377	181.084	11.4185	-0.775431	87.3458	-0.0593164
16.646	181.168	11.4183	-0.775073	87.3437	-0.059289
[truncated: 9,870 more rows]
