# Supplementary material for: Comparative study on mechanisms for improving mechanical properties and microstructure of cement paste modified by different types of nanomaterials
Source: publisher site journal article supplement (doi:10.1515/ntrev-2021-0027), 2021-01-01
Supplement: Supplementary file 9 [file NC-0.3-7d.xlsx]

## Sheet: Sheet1
Time (min)	Temperature (°C)	Weight (mg)			Temperature Difference (°C/mg)
0.004	22.0875	13.7051	-0.817066	100	-0.0596174
0.00433333	22.1404	13.705	-0.817046	99.9988	-0.059616
0.0126667	22.1761	13.7048	-0.816975	99.9971	-0.0596108
0.021	22.226	13.7045	-0.816833	99.9952	-0.0596005
0.0293333	22.2619	13.7042	-0.816576	99.9934	-0.0595817
0.0376667	22.314	13.704	-0.816238	99.9913	-0.059557
0.046	22.3539	13.7037	-0.81584	99.9893	-0.059528
0.0543333	22.3948	13.7033	-0.815396	99.9868	-0.0594956
0.0626667	22.4368	13.703	-0.814908	99.9842	-0.05946
0.071	22.4828	13.7026	-0.814323	99.9817	-0.0594173
0.0793333	22.5236	13.7023	-0.813702	99.9789	-0.059372
0.0876667	22.5711	13.7019	-0.813073	99.9763	-0.0593261
0.096	22.6062	13.7015	-0.812394	99.9737	-0.0592765
0.104333	22.6506	13.7011	-0.811767	99.9707	-0.0592308
0.112667	22.6956	13.7008	-0.811215	99.9681	-0.0591905
0.121	22.7373	13.7004	-0.810685	99.9651	-0.0591519
0.129333	22.7723	13.6999	-0.810163	99.9621	-0.0591138
0.137667	22.8131	13.6996	-0.80966	99.9591	-0.0590771
0.146	22.8594	13.6991	-0.80918	99.9561	-0.0590421
0.154333	22.8978	13.6987	-0.80881	99.9529	-0.0590151
0.162667	22.9398	13.6982	-0.808437	99.9496	-0.0589878
0.171	22.9828	13.6978	-0.808032	99.9462	-0.0589583
0.179333	23.0207	13.6973	-0.807698	99.9429	-0.0589339
0.187667	23.0603	13.6969	-0.807431	99.9395	-0.0589145
0.196	23.1	13.6964	-0.807158	99.9363	-0.0588945
0.204333	23.1443	13.696	-0.806937	99.933	-0.0588784
0.212667	23.185	13.6955	-0.806786	99.9297	-0.0588673
0.221	23.2209	13.6951	-0.806648	99.9264	-0.0588573
0.229333	23.2606	13.6946	-0.806547	99.9229	-0.0588499
0.237667	23.3073	13.6941	-0.806457	99.9197	-0.0588434
0.246	23.3373	13.6937	-0.80634	99.9166	-0.0588348
0.254333	23.3793	13.6933	-0.80633	99.9135	-0.0588341
0.262667	23.4139	13.6928	-0.806397	99.9102	-0.0588389
0.271	23.4538	13.6924	-0.806403	99.9067	-0.0588394
0.279333	23.486	13.6919	-0.806481	99.9031	-0.0588451
0.287667	23.5253	13.6914	-0.806608	99.8994	-0.0588544
0.296	23.563	13.6909	-0.806737	99.8958	-0.0588638
0.304333	23.6105	13.6904	-0.806864	99.8921	-0.0588731
0.312667	23.6362	13.6899	-0.807025	99.8886	-0.0588848
0.321	23.6786	13.6894	-0.80724	99.8849	-0.0589005
0.329333	23.7198	13.6888	-0.80757	99.8809	-0.0589246
0.337667	23.7558	13.6883	-0.807871	99.877	-0.0589465
0.346	23.79	13.6878	-0.808133	99.8733	-0.0589656
0.354333	23.8265	13.6872	-0.808454	99.8692	-0.0589891
0.362667	23.8633	13.6867	-0.80881	99.8652	-0.0590151
0.371	23.8929	13.6862	-0.809204	99.8614	-0.0590438
0.379333	23.9377	13.6856	-0.809628	99.8575	-0.0590748
0.387667	23.9743	13.6851	-0.810088	99.8536	-0.0591083
0.396	24.008	13.6845	-0.810546	99.8494	-0.0591417
0.404333	24.048	13.6839	-0.811008	99.8451	-0.0591754
0.412667	24.0774	13.6834	-0.811488	99.8409	-0.0592104
0.421	24.1118	13.6828	-0.81203	99.8369	-0.05925
0.429333	24.1456	13.6823	-0.812605	99.8331	-0.0592919
0.437667	24.1856	13.6817	-0.81318	99.829	-0.0593339
0.446	24.2198	13.6811	-0.81378	99.8248	-0.0593777
0.454333	24.2528	13.6806	-0.814376	99.8206	-0.0594211
0.462667	24.2908	13.68	-0.814964	99.8162	-0.0594641
0.471	24.3326	13.6794	-0.815639	99.8119	-0.0595133
0.479333	24.3586	13.6788	-0.816334	99.8075	-0.059564
0.487667	24.3983	13.6782	-0.817027	99.8033	-0.0596146
0.496	24.4304	13.6776	-0.817715	99.7991	-0.0596648
0.504333	24.4654	13.677	-0.818434	99.7945	-0.0597173
0.512667	24.5074	13.6763	-0.819203	99.7899	-0.0597734
0.521	24.541	13.6758	-0.819961	99.7856	-0.0598287
0.529333	24.5787	13.6752	-0.820708	99.7813	-0.0598832
0.537667	24.6106	13.6746	-0.821484	99.7769	-0.0599398
0.546	24.6429	13.674	-0.822333	99.7726	-0.0600017
0.554333	24.6822	13.6734	-0.823123	99.7682	-0.0600594
0.562667	24.719	13.6728	-0.823973	99.7638	-0.0601214
0.571	24.7521	13.6722	-0.824817	99.7592	-0.060183
0.579333	24.7859	13.6715	-0.825653	99.7545	-0.060244
0.587667	24.8275	13.6709	-0.826514	99.75	-0.0603068
0.596	24.8594	13.6703	-0.827391	99.7455	-0.0603708
0.604333	24.8995	13.6696	-0.828327	99.7408	-0.0604391
0.612667	24.9345	13.669	-0.829257	99.7359	-0.0605069
0.621	24.9737	13.6683	-0.830131	99.7313	-0.0605707
0.629333	25.0081	13.6677	-0.831049	99.7265	-0.0606377
0.637667	25.0471	13.667	-0.832025	99.722	-0.0607089
0.646	25.0866	13.6665	-0.832951	99.7177	-0.0607765
0.654333	25.1256	13.6659	-0.833914	99.7133	-0.0608467
0.662667	25.1547	13.6652	-0.834887	99.7087	-0.0609178
0.671	25.1913	13.6646	-0.835858	99.7042	-0.0609886
0.679333	25.229	13.664	-0.836844	99.6995	-0.0610606
0.687667	25.2646	13.6633	-0.837857	99.6949	-0.0611345
0.696	25.3004	13.6628	-0.838885	99.6906	-0.0612095
0.704333	25.346	13.6621	-0.839991	99.6862	-0.0612902
0.712667	25.3887	13.6615	-0.841033	99.6817	-0.0613662
0.721	25.428	13.6608	-0.842114	99.6768	-0.0614451
0.729333	25.4675	13.6602	-0.843211	99.6718	-0.0615251
0.737667	25.506	13.6595	-0.84432	99.6669	-0.061606
0.746	25.5526	13.6589	-0.845463	99.6622	-0.0616894
0.754333	25.582	13.6582	-0.84659	99.6576	-0.0617716
0.762667	25.6356	13.6576	-0.847667	99.6532	-0.0618502
0.771	25.6677	13.657	-0.84875	99.6485	-0.0619293
0.779333	25.7086	13.6563	-0.84992	99.6434	-0.0620146
0.787667	25.7494	13.6556	-0.851067	99.6385	-0.0620983
0.796	25.7955	13.655	-0.852244	99.6338	-0.0621842
0.804333	25.8376	13.6543	-0.853374	99.629	-0.0622667
0.812667	25.881	13.6537	-0.854535	99.6243	-0.0623514
0.821	25.9229	13.653	-0.855699	99.6196	-0.0624363
0.829333	25.9624	13.6523	-0.856865	99.6146	-0.0625214
0.837667	26.0067	13.6516	-0.858078	99.6096	-0.0626099
0.846	26.0492	13.6509	-0.859348	99.6045	-0.0627026
0.854333	26.096	13.6502	-0.860622	99.5993	-0.0627955
0.862667	26.1351	13.6496	-0.861834	99.5945	-0.0628839
0.871	26.1794	13.6489	-0.863075	99.5896	-0.0629745
0.879333	26.2333	13.6482	-0.864264	99.5846	-0.0630613
0.887667	26.2728	13.6476	-0.865507	99.5797	-0.0631519
0.896	26.3145	13.6468	-0.866778	99.5745	-0.0632447
0.904333	26.3642	13.6461	-0.868065	99.5693	-0.0633386
0.912667	26.4118	13.6454	-0.869378	99.5643	-0.0634344
0.921	26.4626	13.6447	-0.870646	99.5591	-0.0635269
0.929333	26.507	13.644	-0.871957	99.5541	-0.0636226
0.937667	26.5555	13.6433	-0.873234	99.5491	-0.0637157
0.946	26.6045	13.6426	-0.874536	99.544	-0.0638107
0.954333	26.6598	13.6419	-0.875855	99.5386	-0.063907
0.962667	26.6994	13.6412	-0.877234	99.5333	-0.0640076
0.971	26.7537	13.6405	-0.878571	99.5281	-0.0641052
0.979333	26.7985	13.6397	-0.879932	99.5227	-0.0642045
0.987667	26.8544	13.639	-0.881281	99.5176	-0.0643029
0.996	26.8997	13.6383	-0.882628	99.5123	-0.0644012
1.00433	26.9467	13.6376	-0.884035	99.5071	-0.0645039
1.01267	27.0032	13.6369	-0.885368	99.5018	-0.0646011
1.021	27.051	13.6361	-0.886752	99.4964	-0.0647021
1.02933	27.0986	13.6354	-0.88815	99.491	-0.0648041
1.03767	27.1533	13.6347	-0.889526	99.4858	-0.0649045
1.046	27.2063	13.634	-0.890929	99.4806	-0.0650068
1.05433	27.2551	13.6332	-0.89238	99.475	-0.0651127
1.06267	27.3101	13.6325	-0.893812	99.4698	-0.0652173
1.071	27.366	13.6318	-0.895253	99.4645	-0.0653224
1.07933	27.4166	13.631	-0.896699	99.4593	-0.0654279
1.08767	27.4747	13.6303	-0.898134	99.4538	-0.0655326
1.096	27.5299	13.6296	-0.899621	99.4485	-0.0656411
1.10433	27.5802	13.6289	-0.901112	99.4435	-0.0657499
1.11267	27.6388	13.6282	-0.902637	99.4383	-0.0658612
1.121	27.6933	13.6274	-0.90415	99.433	-0.0659716
1.12933	27.7505	13.6267	-0.90565	99.4277	-0.066081
1.13767	27.8099	13.626	-0.907151	99.4223	-0.0661906
1.146	27.8642	13.6252	-0.908661	99.4169	-0.0663007
1.15433	27.9253	13.6245	-0.910194	99.4115	-0.0664125
1.16267	27.9843	13.6238	-0.911768	99.4061	-0.0665274
1.171	28.0361	13.623	-0.913377	99.4005	-0.0666448
1.17933	28.0947	13.6222	-0.915011	99.395	-0.066764
1.18767	28.1576	13.6215	-0.916605	99.3894	-0.0668803
1.196	28.2216	13.6207	-0.918188	99.3835	-0.0669958
1.20433	28.2793	13.6199	-0.9198	99.3777	-0.0671135
1.21267	28.3473	13.619	-0.921411	99.3718	-0.067231
1.221	28.4062	13.6183	-0.923019	99.3662	-0.0673484
1.22933	28.4623	13.6175	-0.924641	99.3608	-0.0674667
1.23767	28.5282	13.6168	-0.926282	99.3551	-0.0675864
1.246	28.5813	13.616	-0.927905	99.3494	-0.0677048
1.25433	28.6498	13.6152	-0.929501	99.3438	-0.0678213
1.26267	28.7101	13.6144	-0.93109	99.3378	-0.0679372
1.271	28.7704	13.6136	-0.932756	99.3317	-0.0680588
1.27933	28.8299	13.6128	-0.934418	99.326	-0.0681801
1.28767	28.8998	13.612	-0.936121	99.3205	-0.0683043
1.296	28.9672	13.6113	-0.937848	99.3149	-0.0684303
1.30433	29.0287	13.6105	-0.939574	99.3091	-0.0685563
1.31267	29.0911	13.6096	-0.941294	99.3031	-0.0686818
1.321	29.1557	13.6088	-0.943017	99.2973	-0.0688075
1.32933	29.2223	13.6081	-0.944749	99.2916	-0.0689339
1.33767	29.2853	13.6073	-0.9465	99.2859	-0.0690616
1.346	29.3548	13.6065	-0.948274	99.2802	-0.0691911
1.35433	29.413	13.6057	-0.950002	99.2745	-0.0693172
1.36267	29.4857	13.6049	-0.951742	99.2686	-0.0694441
1.371	29.5493	13.6041	-0.953489	99.2625	-0.0695716
1.37933	29.6165	13.6032	-0.955279	99.2565	-0.0697022
1.38767	29.689	13.6025	-0.957063	99.2507	-0.0698324
1.396	29.7587	13.6017	-0.958896	99.2449	-0.0699661
1.40433	29.8283	13.6008	-0.96076	99.239	-0.0701021
1.41267	29.8953	13.6	-0.962612	99.2328	-0.0702372
1.421	29.9603	13.5992	-0.964476	99.2268	-0.0703732
1.42933	30.0266	13.5983	-0.96634	99.2207	-0.0705093
1.43767	30.0946	13.5975	-0.968247	99.2145	-0.0706484
1.446	30.1693	13.5966	-0.970152	99.2082	-0.0707874
1.45433	30.2419	13.5958	-0.972056	99.2021	-0.0709263
1.46267	30.3106	13.5949	-0.97396	99.1958	-0.0710653
1.471	30.3789	13.594	-0.975876	99.1893	-0.0712051
1.47933	30.4525	13.5931	-0.977767	99.1827	-0.071343
1.48767	30.53	13.5922	-0.979642	99.1761	-0.0714799
1.496	30.5966	13.5914	-0.981578	99.1699	-0.0716211
1.50433	30.6654	13.5905	-0.983505	99.1635	-0.0717617
1.51267	30.7416	13.5896	-0.985427	99.1572	-0.0719019
1.521	30.8166	13.5888	-0.987363	99.1509	-0.0720432
1.52933	30.8985	13.5879	-0.989348	99.1446	-0.0721881
1.53767	30.9599	13.587	-0.991326	99.1383	-0.0723324
1.546	31.0349	13.5862	-0.99328	99.1319	-0.0724749
1.55433	31.1095	13.5853	-0.995294	99.1254	-0.0726219
1.56267	31.1843	13.5844	-0.997342	99.1192	-0.0727713
1.571	31.2606	13.5836	-0.999349	99.1128	-0.0729178
1.57933	31.3384	13.5827	-1.00136	99.1062	-0.0730648
1.58767	31.413	13.5817	-1.00342	99.0995	-0.0732145
1.596	31.4902	13.5808	-1.00543	99.0927	-0.0733617
1.60433	31.5652	13.5799	-1.00748	99.0858	-0.0735108
1.61267	31.6383	13.5789	-1.00952	99.0789	-0.0736596
1.621	31.7142	13.578	-1.01156	99.0721	-0.073809
1.62933	31.7945	13.5771	-1.01364	99.0655	-0.0739604
1.63767	31.8693	13.5762	-1.01572	99.0588	-0.0741122
1.646	31.944	13.5752	-1.01782	99.0518	-0.0742659
1.65433	32.022	13.5742	-1.01997	99.0449	-0.0744224
1.66267	32.1028	13.5733	-1.02208	99.038	-0.0745761
1.671	32.1786	13.5724	-1.02419	99.0313	-0.0747304
1.67933	32.2615	13.5714	-1.02634	99.0242	-0.0748869
1.68767	32.3364	13.5705	-1.02848	99.0172	-0.075043
1.696	32.4163	13.5695	-1.03061	99.0104	-0.0751984
1.70433	32.4972	13.5686	-1.03276	99.0035	-0.0753552
1.71267	32.5712	13.5676	-1.03494	98.9967	-0.0755145
1.721	32.654	13.5667	-1.0371	98.9896	-0.0756721
1.72933	32.7338	13.5657	-1.03921	98.9826	-0.0758262
1.73767	32.8124	13.5647	-1.04139	98.9755	-0.0759853
1.746	32.8989	13.5637	-1.04358	98.9682	-0.076145
1.75433	32.9732	13.5627	-1.04574	98.9609	-0.0763026
1.76267	33.0567	13.5618	-1.04799	98.9539	-0.0764667
1.771	33.1331	13.5608	-1.05024	98.9468	-0.0766308
1.77933	33.2172	13.5598	-1.05248	98.9397	-0.0767943
1.78767	33.2974	13.5588	-1.05474	98.9324	-0.0769596
1.796	33.3733	13.5578	-1.05697	98.9249	-0.0771224
1.80433	33.456	13.5568	-1.05922	98.9173	-0.0772863
1.81267	33.5391	13.5558	-1.06149	98.91	-0.0774521
1.821	33.623	13.5547	-1.06377	98.9024	-0.0776183
1.82933	33.7088	13.5537	-1.06608	98.8949	-0.0777866
1.83767	33.7861	13.5527	-1.06839	98.8876	-0.0779552
1.846	33.8706	13.5516	-1.07065	98.8799	-0.0781202
1.85433	33.9503	13.5506	-1.07289	98.8725	-0.078284
1.86267	34.0301	13.5496	-1.07522	98.8649	-0.0784534
1.871	34.116	13.5485	-1.07756	98.8572	-0.0786246
1.87933	34.2014	13.5475	-1.07988	98.8496	-0.0787939
1.88767	34.2824	13.5465	-1.0822	98.8423	-0.0789627
1.896	34.3643	13.5454	-1.08453	98.8346	-0.0791331
1.90433	34.4526	13.5444	-1.08681	98.8272	-0.0792993
1.91267	34.5395	13.5434	-1.08912	98.8195	-0.0794682
1.921	34.6194	13.5423	-1.09147	98.8118	-0.0796392
1.92933	34.6995	13.5413	-1.09385	98.8043	-0.0798131
1.93767	34.7884	13.5402	-1.09627	98.7964	-0.0799894
1.946	34.8738	13.5391	-1.09864	98.7886	-0.0801622
1.95433	34.9529	13.538	-1.10097	98.7806	-0.0803328
1.96267	35.0393	13.5369	-1.10337	98.7727	-0.0805078
1.971	35.1243	13.5358	-1.10587	98.7645	-0.0806903
1.97933	35.2068	13.5347	-1.10834	98.7566	-0.0808706
1.98767	35.2893	13.5336	-1.11083	98.7486	-0.0810523
1.996	35.3777	13.5325	-1.11329	98.7404	-0.0812317
2.00433	35.4626	13.5314	-1.11577	98.7322	-0.0814122
2.01267	35.5458	13.5303	-1.11822	98.7239	-0.0815911
2.021	35.6333	13.5291	-1.12069	98.7157	-0.0817713
2.02933	35.7189	13.528	-1.1232	98.7075	-0.0819544
2.03767	35.8018	13.5269	-1.12568	98.6994	-0.0821356
2.046	35.8911	13.5258	-1.12816	98.6914	-0.0823164
2.05433	35.9778	13.5247	-1.13058	98.683	-0.0824932
2.06267	36.0617	13.5235	-1.13305	98.6744	-0.0826737
2.071	36.15	13.5223	-1.13552	98.666	-0.0828534
2.07933	36.236	13.5212	-1.13801	98.6577	-0.083035
2.08767	36.3228	13.52	-1.14052	98.6494	-0.0832184
2.096	36.4078	13.5189	-1.14305	98.6409	-0.0834029
2.10433	36.4965	13.5177	-1.14557	98.6324	-0.0835868
2.11267	36.5772	13.5165	-1.14805	98.6238	-0.0837678
2.121	36.6672	13.5153	-1.15058	98.615	-0.0839522
2.12933	36.7493	13.5141	-1.15311	98.6061	-0.0841373
2.13767	36.8354	13.5129	-1.15567	98.5974	-0.0843238
2.146	36.9248	13.5118	-1.15821	98.5889	-0.0845093
2.15433	37.0162	13.5106	-1.16079	98.5803	-0.0846973
2.16267	37.1012	13.5094	-1.16339	98.5717	-0.0848868
2.171	37.1887	13.5082	-1.16599	98.563	-0.0850766
2.17933	37.2752	13.507	-1.16858	98.5543	-0.0852658
2.18767	37.3625	13.5058	-1.17117	98.5455	-0.0854549
2.196	37.4518	13.5046	-1.1738	98.5367	-0.0856469
2.20433	37.5371	13.5034	-1.17645	98.5279	-0.0858398
2.21267	37.6245	13.5022	-1.1791	98.5192	-0.0860334
2.221	37.7144	13.501	-1.18171	98.5103	-0.0862236
2.22933	37.7976	13.4997	-1.18436	98.5011	-0.0864169
2.23767	37.8877	13.4985	-1.18706	98.4922	-0.0866143
2.246	37.974	13.4972	-1.1897	98.483	-0.0868068
2.25433	38.0582	13.496	-1.19232	98.4738	-0.0869979
2.26267	38.1458	13.4947	-1.19498	98.4647	-0.0871922
2.271	38.2285	13.4935	-1.19768	98.4558	-0.087389
2.27933	38.3166	13.4923	-1.20037	98.4467	-0.0875856
2.28767	38.4042	13.491	-1.20305	98.4375	-0.0877808
2.296	38.4957	13.4898	-1.20572	98.4283	-0.0879758
2.30433	38.5805	13.4885	-1.20845	98.419	-0.088175
2.31267	38.6717	13.4872	-1.21115	98.4096	-0.0883716
2.321	38.7543	13.4859	-1.21381	98.4002	-0.0885658
2.32933	38.8443	13.4846	-1.21653	98.3908	-0.0887648
2.33767	38.9286	13.4833	-1.21928	98.3814	-0.0889648
2.346	39.0185	13.482	-1.22198	98.3719	-0.0891623
2.35433	39.1031	13.4807	-1.22467	98.3621	-0.0893582
2.36267	39.1935	13.4793	-1.22737	98.3524	-0.0895557
2.371	39.2791	13.478	-1.23011	98.3424	-0.0897553
2.37933	39.3685	13.4767	-1.23286	98.3328	-0.089956
2.38767	39.4531	13.4754	-1.23562	98.3235	-0.0901576
2.396	39.5405	13.4741	-1.2384	98.3141	-0.09036
2.40433	39.6299	13.4727	-1.24114	98.3043	-0.0905603
2.41267	39.71	13.4714	-1.24393	98.2943	-0.0907635
2.421	39.8024	13.47	-1.24671	98.2843	-0.0909665
2.42933	39.8908	13.4687	-1.24949	98.2744	-0.0911696
2.43767	39.9728	13.4673	-1.25232	98.2648	-0.0913759
2.446	40.0645	13.466	-1.25514	98.2551	-0.0915817
2.45433	40.1458	13.4647	-1.258	98.2456	-0.0917905
2.46267	40.2337	13.4633	-1.2609	98.2356	-0.0920015
2.471	40.3245	13.4619	-1.26375	98.2253	-0.0922099
2.47933	40.4123	13.4605	-1.26662	98.2151	-0.0924195
2.48767	40.5069	13.4591	-1.2695	98.205	-0.0926297
2.496	40.5907	13.4578	-1.27238	98.1951	-0.0928396
2.50433	40.6781	13.4564	-1.27527	98.1851	-0.0930504
2.51267	40.7597	13.455	-1.27821	98.1748	-0.0932646
2.521	40.8447	13.4536	-1.28112	98.1646	-0.093477
2.52933	40.9316	13.4522	-1.28403	98.1542	-0.0936895
2.53767	41.0135	13.4507	-1.28693	98.1438	-0.0939011
2.546	41.1053	13.4493	-1.28981	98.1333	-0.094111
2.55433	41.1918	13.4479	-1.29274	98.1229	-0.0943251
2.56267	41.2779	13.4465	-1.29565	98.1125	-0.0945377
2.571	41.3666	13.4451	-1.29861	98.1022	-0.0947537
2.57933	41.4524	13.4436	-1.30152	98.0917	-0.0949657
2.58767	41.5439	13.4422	-1.30444	98.0811	-0.0951787
2.596	41.624	13.4407	-1.30739	98.0707	-0.0953941
2.60433	41.7099	13.4393	-1.31032	98.0599	-0.0956079
2.61267	41.797	13.4378	-1.31322	98.0494	-0.0958197
2.621	41.8812	13.4364	-1.31614	98.0389	-0.0960325
2.62933	41.9735	13.4349	-1.31907	98.0283	-0.0962465
2.63767	42.0558	13.4335	-1.32199	98.0175	-0.0964597
2.646	42.146	13.432	-1.32494	98.0067	-0.0966748
2.65433	42.2342	13.4305	-1.32786	97.9959	-0.096888
2.66267	42.3165	13.429	-1.33081	97.9851	-0.0971026
2.671	42.4037	13.4276	-1.33376	97.9745	-0.097318
2.67933	42.4857	13.4261	-1.33668	97.9636	-0.0975309
2.68767	42.5744	13.4246	-1.33963	97.9527	-0.0977468
2.696	42.6594	13.423	-1.34263	97.9415	-0.0979654
2.70433	42.7472	13.4215	-1.34562	97.9304	-0.0981832
2.71267	42.832	13.42	-1.34861	97.9194	-0.0984013
2.721	42.9208	13.4185	-1.35157	97.9085	-0.0986178
2.72933	43.0042	13.417	-1.35456	97.8976	-0.0988357
2.73767	43.0912	13.4155	-1.35755	97.8865	-0.0990541
2.746	43.1779	13.4139	-1.36056	97.8751	-0.0992736
2.75433	43.265	13.4124	-1.36354	97.8636	-0.0994914
2.76267	43.3454	13.4108	-1.36655	97.8524	-0.0997109
2.771	43.4297	13.4093	-1.36957	97.8413	-0.0999312
2.77933	43.5153	13.4078	-1.37257	97.8301	-0.10015
2.78767	43.6081	13.4062	-1.37555	97.8189	-0.100367
2.796	43.6901	13.4047	-1.37852	97.8076	-0.100584
2.80433	43.7696	13.4031	-1.38151	97.7962	-0.100802
2.81267	43.8629	13.4016	-1.38448	97.7848	-0.101019
2.821	43.9357	13.4	-1.38745	97.7734	-0.101236
2.82933	44.0247	13.3984	-1.39041	97.7621	-0.101452
2.83767	44.1065	13.3969	-1.39342	97.7508	-0.101671
2.846	44.1957	13.3953	-1.39635	97.7395	-0.101885
2.85433	44.2782	13.3938	-1.39927	97.728	-0.102098
2.86267	44.3674	13.3922	-1.40223	97.7163	-0.102314
2.871	44.4463	13.3905	-1.40521	97.7044	-0.102531
2.87933	44.535	13.3889	-1.40816	97.6926	-0.102747
2.88767	44.6171	13.3873	-1.41114	97.6809	-0.102964
2.896	44.7	13.3857	-1.41411	97.6691	-0.103181
2.90433	44.7835	13.3841	-1.41708	97.6574	-0.103398
2.91267	44.8672	13.3825	-1.42007	97.6457	-0.103616
2.921	44.9523	13.3809	-1.42304	97.634	-0.103832
2.92933	45.0323	13.3793	-1.42607	97.6224	-0.104054
2.93767	45.1204	13.3776	-1.42907	97.6104	-0.104273
2.946	45.2028	13.3761	-1.43205	97.5988	-0.10449
2.95433	45.2846	13.3745	-1.43503	97.5873	-0.104707
2.96267	45.3696	13.3729	-1.43802	97.5757	-0.104926
2.971	45.4543	13.3713	-1.44096	97.564	-0.10514
2.97933	45.5395	13.3697	-1.4439	97.5521	-0.105355
2.98767	45.6195	13.368	-1.44686	97.5402	-0.105571
2.996	45.6985	13.3664	-1.4498	97.5282	-0.105785
3.00433	45.7841	13.3647	-1.45273	97.5162	-0.105999
3.01267	45.8716	13.3631	-1.45567	97.504	-0.106213
3.021	45.9526	13.3614	-1.4586	97.492	-0.106427
3.02933	46.0345	13.3598	-1.46155	97.48	-0.106642
3.03767	46.1157	13.3581	-1.46446	97.4678	-0.106855
3.046	46.2008	13.3565	-1.4674	97.4558	-0.107069
3.05433	46.2822	13.3548	-1.47033	97.4437	-0.107283
3.06267	46.3689	13.3531	-1.47323	97.4315	-0.107495
3.071	46.4425	13.3515	-1.47614	97.4193	-0.107707
3.07933	46.5254	13.3498	-1.47906	97.4071	-0.10792
3.08767	46.6122	13.3481	-1.48196	97.3948	-0.108132
3.096	46.6969	13.3465	-1.48481	97.3827	-0.108339
3.10433	46.7749	13.3448	-1.48766	97.3707	-0.108548
3.11267	46.8578	13.3431	-1.49051	97.3586	-0.108756
3.121	46.9427	13.3415	-1.49335	97.3466	-0.108963
3.12933	47.0201	13.3398	-1.49617	97.3345	-0.109168
3.13767	47.106	13.3382	-1.49902	97.3224	-0.109376
3.146	47.1869	13.3365	-1.50186	97.3102	-0.109584
3.15433	47.2627	13.3349	-1.50466	97.2982	-0.109788
3.16267	47.3469	13.3332	-1.50742	97.286	-0.10999
3.171	47.4323	13.3315	-1.51016	97.2737	-0.11019
3.17933	47.5173	13.3298	-1.51291	97.2612	-0.11039
3.18767	47.5956	13.3281	-1.51568	97.2487	-0.110592
3.196	47.6737	13.3264	-1.5184	97.2362	-0.11079
3.20433	47.7536	13.3246	-1.52112	97.2236	-0.110989
3.21267	47.8381	13.323	-1.5238	97.2113	-0.111184
3.221	47.9166	13.3212	-1.52646	97.1989	-0.111378
3.22933	48.0035	13.3196	-1.52913	97.1865	-0.111573
3.23767	48.0877	13.3178	-1.53177	97.174	-0.111766
3.246	48.1656	13.3161	-1.53444	97.1616	-0.111961
3.25433	48.2492	13.3145	-1.53707	97.1494	-0.112153
3.26267	48.3232	13.3128	-1.53968	97.1374	-0.112343
3.271	48.4086	13.3112	-1.5423	97.1253	-0.112534
3.27933	48.4863	13.3095	-1.5449	97.1131	-0.112724
3.28767	48.5655	13.3078	-1.54744	97.101	-0.11291
3.296	48.6493	13.3062	-1.55003	97.0888	-0.113098
3.30433	48.7281	13.3045	-1.55257	97.0765	-0.113283
3.31267	48.8132	13.3028	-1.55505	97.0641	-0.113465
3.321	48.8888	13.3011	-1.55757	97.0518	-0.113649
3.32933	48.9738	13.2994	-1.56001	97.0397	-0.113826
3.33767	49.0511	13.2978	-1.56244	97.0275	-0.114004
3.346	49.1293	13.2961	-1.56488	97.0152	-0.114182
3.35433	49.2158	13.2944	-1.56728	97.0027	-0.114357
3.36267	49.2917	13.2927	-1.56966	96.9902	-0.114531
3.371	49.3714	13.291	-1.57205	96.9779	-0.114705
3.37933	49.4497	13.2892	-1.5744	96.9654	-0.114876
3.38767	49.5287	13.2876	-1.57674	96.9532	-0.115048
3.396	49.607	13.2859	-1.57906	96.9411	-0.115217
3.40433	49.6881	13.2843	-1.5813	96.9289	-0.11538
3.41267	49.771	13.2826	-1.58361	96.9165	-0.115549
3.421	49.8496	13.2809	-1.58587	96.9042	-0.115714
3.42933	49.9382	13.2792	-1.58807	96.8919	-0.115874
3.43767	50.0093	13.2775	-1.59024	96.8799	-0.116032
3.446	50.0943	13.2759	-1.59239	96.8678	-0.116189
3.45433	50.1679	13.2742	-1.59455	96.8557	-0.116347
3.46267	50.2516	13.2726	-1.59672	96.8435	-0.116505
3.471	50.3322	13.2709	-1.59878	96.8313	-0.116655
3.47933	50.413	13.2692	-1.60081	96.8193	-0.116804
3.48767	50.4898	13.2676	-1.60286	96.8075	-0.116953
3.496	50.5779	13.2659	-1.60484	96.7952	-0.117098
3.50433	50.6538	13.2643	-1.60684	96.783	-0.117244
3.51267	50.7378	13.2626	-1.60884	96.7711	-0.117389
3.521	50.8074	13.261	-1.61082	96.759	-0.117534
3.52933	50.8908	13.2593	-1.61275	96.7468	-0.117675
3.53767	50.9685	13.2576	-1.61464	96.7347	-0.117813
3.546	51.0505	13.256	-1.61646	96.7228	-0.117945
3.55433	51.1305	13.2544	-1.61828	96.711	-0.118078
3.56267	51.2135	13.2527	-1.62013	96.6988	-0.118213
3.571	51.2943	13.2511	-1.62192	96.6867	-0.118344
3.57933	51.3717	13.2495	-1.62369	96.675	-0.118473
3.58767	51.451	13.2478	-1.62542	96.6633	-0.118599
3.596	51.5325	13.2462	-1.62711	96.6513	-0.118723
3.60433	51.6084	13.2446	-1.62876	96.6394	-0.118843
3.61267	51.6874	13.243	-1.63039	96.6275	-0.118962
3.621	51.7721	13.2413	-1.632	96.6158	-0.11908
3.62933	51.8529	13.2397	-1.63361	96.6041	-0.119197
3.63767	51.9318	13.2381	-1.63519	96.5922	-0.119312
3.646	52.0099	13.2365	-1.63666	96.5806	-0.11942
3.65433	52.0844	13.2349	-1.63814	96.5687	-0.119528
3.66267	52.1684	13.2332	-1.63959	96.5567	-0.119633
3.671	52.2473	13.2316	-1.64102	96.5449	-0.119737
3.67933	52.3291	13.2301	-1.64241	96.5335	-0.119839
3.68767	52.4041	13.2285	-1.64378	96.522	-0.119939
3.696	52.4866	13.2269	-1.64507	96.5107	-0.120033
3.70433	52.5709	13.2254	-1.64636	96.4992	-0.120127
3.71267	52.6435	13.2238	-1.64761	96.4876	-0.120218
3.721	52.7295	13.2222	-1.64883	96.4763	-0.120307
3.72933	52.8001	13.2207	-1.65009	96.465	-0.120399
3.73767	52.8782	13.2191	-1.65131	96.4537	-0.120488
3.746	52.9565	13.2176	-1.65251	96.4423	-0.120576
3.75433	53.0408	13.216	-1.65363	96.431	-0.120658
3.76267	53.1214	13.2145	-1.65474	96.4197	-0.120738
3.771	53.199	13.2129	-1.6558	96.4084	-0.120816
3.77933	53.271	13.2113	-1.65691	96.3969	-0.120897
3.78767	53.3529	13.2098	-1.65797	96.3856	-0.120975
3.796	53.4364	13.2083	-1.65901	96.3744	-0.12105
3.80433	53.5137	13.2067	-1.66004	96.3633	-0.121125
3.81267	53.5947	13.2052	-1.66103	96.352	-0.121197
3.821	53.6708	13.2037	-1.66192	96.341	-0.121263
3.82933	53.7507	13.2022	-1.6628	96.3299	-0.121326
3.83767	53.8292	13.2006	-1.66369	96.3188	-0.121391
3.846	53.9027	13.1991	-1.66453	96.3077	-0.121453
3.85433	53.9883	13.1976	-1.66536	96.2965	-0.121513
3.86267	54.0693	13.196	-1.66613	96.2853	-0.12157
3.871	54.1478	13.1945	-1.66689	96.274	-0.121625
3.87933	54.2315	13.193	-1.66765	96.2629	-0.12168
3.88767	54.3058	13.1914	-1.66839	96.2515	-0.121735
3.896	54.3841	13.1899	-1.66908	96.2405	-0.121785
3.90433	54.4643	13.1884	-1.66978	96.2294	-0.121836
3.91267	54.544	13.1869	-1.67043	96.2184	-0.121884
3.921	54.6249	13.1854	-1.67105	96.2076	-0.121929
3.92933	54.7058	13.1839	-1.67171	96.1967	-0.121977
3.93767	54.7757	13.1824	-1.67229	96.1857	-0.122019
3.946	54.8644	13.1809	-1.67281	96.1752	-0.122057
3.95433	54.9409	13.1795	-1.6733	96.1645	-0.122093
3.96267	55.0141	13.178	-1.67373	96.1538	-0.122124
3.971	55.1001	13.1766	-1.67414	96.1432	-0.122154
3.97933	55.1791	13.1751	-1.67457	96.1324	-0.122186
3.98767	55.2584	13.1736	-1.67498	96.1217	-0.122216
3.996	55.3365	13.1721	-1.67533	96.1107	-0.122241
4.00433	55.4141	13.1706	-1.67569	96.0997	-0.122267
4.01267	55.4873	13.1691	-1.67601	96.089	-0.12229
4.021	55.5671	13.1677	-1.67635	96.0784	-0.122315
4.02933	55.645	13.1662	-1.6767	96.0679	-0.122341
4.03767	55.7255	13.1648	-1.67705	96.0572	-0.122366
4.046	55.8055	13.1633	-1.67738	96.0465	-0.12239
4.05433	55.882	13.1618	-1.67768	96.0358	-0.122412
4.06267	55.9665	13.1604	-1.67791	96.0252	-0.122429
4.071	56.0473	13.159	-1.67814	96.0146	-0.122446
4.07933	56.1214	13.1575	-1.67837	96.0043	-0.122463
4.08767	56.2052	13.1561	-1.67857	95.9937	-0.122478
4.096	56.2814	13.1546	-1.67873	95.9832	-0.122489
4.10433	56.3604	13.1532	-1.67889	95.9727	-0.122501
4.11267	56.4376	13.1517	-1.67903	95.962	-0.122511
4.121	56.5171	13.1503	-1.67911	95.9517	-0.122516
4.12933	56.5938	13.1489	-1.67918	95.9413	-0.122521
4.13767	56.6758	13.1475	-1.67923	95.931	-0.122526
4.146	56.7553	13.1461	-1.6793	95.9207	-0.122531
4.15433	56.8339	13.1447	-1.67938	95.9104	-0.122537
4.16267	56.9171	13.1433	-1.67944	95.9002	-0.122541
4.171	56.989	13.1419	-1.67948	95.8901	-0.122544
4.17933	57.0672	13.1405	-1.67951	95.88	-0.122546
4.18767	57.1483	13.1391	-1.67948	95.8699	-0.122543
4.196	57.2257	13.1377	-1.67945	95.8597	-0.122542
4.20433	57.3076	13.1363	-1.67942	95.8495	-0.12254
4.21267	57.39	13.1349	-1.67937	95.8393	-0.122535
4.221	57.4667	13.1335	-1.67929	95.8291	-0.12253
4.22933	57.5457	13.1321	-1.67917	95.8189	-0.122521
4.23767	57.6263	13.1308	-1.67901	95.8091	-0.12251
4.246	57.7063	13.1294	-1.67885	95.7991	-0.122498
4.25433	57.787	13.128	-1.67868	95.7891	-0.122486
4.26267	57.8653	13.1267	-1.67851	95.7791	-0.122473
4.271	57.9439	13.1253	-1.67836	95.769	-0.122462
4.27933	58.026	13.1239	-1.67814	95.7592	-0.122446
4.28767	58.1039	13.1226	-1.67789	95.7493	-0.122428
4.296	58.1845	13.1212	-1.67768	95.7396	-0.122412
4.30433	58.2623	13.1199	-1.67745	95.7298	-0.122396
4.31267	58.3377	13.1186	-1.67722	95.7201	-0.122379
4.321	58.4198	13.1172	-1.67698	95.7102	-0.122361
4.32933	58.4973	13.1159	-1.67675	95.7004	-0.122345
4.33767	58.5805	13.1145	-1.67643	95.6905	-0.122321
4.346	58.6618	13.1132	-1.67606	95.6806	-0.122294
4.35433	58.7377	13.1118	-1.67568	95.6708	-0.122267
4.36267	58.8197	13.1105	-1.67534	95.6611	-0.122241
4.371	58.8975	13.1092	-1.67501	95.6515	-0.122217
4.37933	58.9811	13.1079	-1.67462	95.6419	-0.122189
4.38767	59.0547	13.1066	-1.6742	95.6324	-0.122158
4.396	59.1373	13.1052	-1.67378	95.6227	-0.122127
4.40433	59.2151	13.1039	-1.67334	95.6132	-0.122096
4.41267	59.2914	13.1026	-1.67292	95.6036	-0.122065
4.421	59.3769	13.1013	-1.6725	95.594	-0.122035
4.42933	59.4585	13.1	-1.67208	95.5846	-0.122004
4.43767	59.5358	13.0988	-1.67161	95.5754	-0.12197
4.446	59.6163	13.0975	-1.67114	95.566	-0.121935
4.45433	59.6941	13.0962	-1.67067	95.5567	-0.121901
4.46267	59.773	13.0949	-1.67019	95.5473	-0.121866
4.471	59.8502	13.0936	-1.66969	95.5378	-0.121829
4.47933	59.9393	13.0923	-1.66921	95.5285	-0.121794
4.48767	60.0159	13.091	-1.66871	95.5192	-0.121758
4.496	60.0915	13.0898	-1.66814	95.5099	-0.121716
4.50433	60.1727	13.0885	-1.66761	95.5005	-0.121678
4.51267	60.251	13.0872	-1.66705	95.491	-0.121637
4.521	60.3294	13.0859	-1.66653	95.4816	-0.121598
4.52933	60.4177	13.0846	-1.66597	95.4721	-0.121558
4.53767	60.4904	13.0833	-1.66538	95.4627	-0.121515
4.546	60.572	13.082	-1.6648	95.4534	-0.121472
4.55433	60.6527	13.0808	-1.66421	95.4443	-0.12143
4.56267	60.7289	13.0795	-1.66354	95.4349	-0.121381
4.571	60.8128	13.0783	-1.6629	95.4258	-0.121334
4.57933	60.8916	13.077	-1.66227	95.4165	-0.121288
4.58767	60.9697	13.0757	-1.66165	95.4074	-0.121243
4.596	61.0583	13.0745	-1.66102	95.3984	-0.121197
4.60433	61.1345	13.0732	-1.66034	95.3892	-0.121147
4.61267	61.2132	13.072	-1.65967	95.3801	-0.121098
4.621	61.292	13.0707	-1.65898	95.3709	-0.121048
4.62933	61.3796	13.0695	-1.65826	95.3618	-0.120995
4.63767	61.4551	13.0682	-1.65757	95.3526	-0.120945
4.646	61.5357	13.067	-1.65689	95.3437	-0.120896
4.65433	61.616	13.0658	-1.65617	95.3347	-0.120843
4.66267	61.6923	13.0645	-1.65545	95.3258	-0.12079
4.671	61.7737	13.0633	-1.6547	95.3169	-0.120735
4.67933	61.8557	13.0621	-1.65395	95.3081	-0.120681
4.68767	61.9344	13.0609	-1.6532	95.2991	-0.120626
4.696	62.012	13.0597	-1.65245	95.2904	-0.120571
4.70433	62.0919	13.0585	-1.65166	95.2816	-0.120514
4.71267	62.179	13.0573	-1.6509	95.2727	-0.120458
4.721	62.2587	13.056	-1.6501	95.2636	-0.1204
4.72933	62.3367	13.0548	-1.64929	95.2545	-0.120341
4.73767	62.4152	13.0535	-1.64849	95.2456	-0.120283
4.746	62.5021	13.0524	-1.64768	95.2368	-0.120223
4.75433	62.5841	13.0511	-1.64684	95.2281	-0.120162
4.76267	62.6559	13.0499	-1.64604	95.2192	-0.120104
4.771	62.7384	13.0487	-1.64527	95.2105	-0.120047
4.77933	62.8214	13.0475	-1.64441	95.2017	-0.119985
4.78767	62.9083	13.0463	-1.64358	95.193	-0.119924
4.796	62.984	13.0451	-1.64272	95.1841	-0.119862
4.80433	63.0628	13.0439	-1.64188	95.1755	-0.1198
4.81267	63.1435	13.0428	-1.64101	95.167	-0.119737
4.821	63.2284	13.0416	-1.64013	95.1586	-0.119673
4.82933	63.306	13.0405	-1.63924	95.1502	-0.119607
4.83767	63.3906	13.0393	-1.63835	95.1417	-0.119543
4.846	63.4736	13.0382	-1.63747	95.1333	-0.119478
4.85433	63.5488	13.0369	-1.63655	95.1245	-0.119411
4.86267	63.6341	13.0358	-1.63564	95.1157	-0.119345
4.871	63.7166	13.0346	-1.63473	95.1072	-0.119279
4.87933	63.7952	13.0334	-1.63386	95.0988	-0.119215
4.88767	63.8755	13.0323	-1.63298	95.0906	-0.11915
4.896	63.9541	13.0312	-1.6321	95.0823	-0.119086
4.90433	64.0366	13.03	-1.63121	95.0737	-0.119021
4.91267	64.1178	13.0288	-1.6303	95.0652	-0.118955
4.921	64.201	13.0277	-1.62938	95.0568	-0.118888
4.92933	64.2782	13.0265	-1.62844	95.0481	-0.118819
4.93767	64.3567	13.0254	-1.62749	95.0399	-0.11875
4.946	64.4415	13.0242	-1.62658	95.0317	-0.118684
4.95433	64.5241	13.0231	-1.62566	95.0235	-0.118617
4.96267	64.6019	13.022	-1.62472	95.0154	-0.118548
4.971	64.6869	13.0209	-1.62379	95.0071	-0.11848
4.97933	64.7679	13.0197	-1.62283	94.9986	-0.11841
4.98767	64.8481	13.0186	-1.6219	94.9903	-0.118342
4.996	64.9368	13.0174	-1.62097	94.9818	-0.118274
5.00433	65.0095	13.0162	-1.62006	94.9734	-0.118208
5.01267	65.0965	13.0152	-1.61914	94.9655	-0.118141
5.021	65.1743	13.014	-1.61821	94.9572	-0.118073
5.02933	65.2587	13.0129	-1.61733	94.9488	-0.118009
5.03767	65.3394	13.0117	-1.61641	94.9404	-0.117942
5.046	65.4251	13.0106	-1.61547	94.932	-0.117873
5.05433	65.5066	13.0094	-1.61453	94.9235	-0.117804
5.06267	65.5848	13.0083	-1.61362	94.9153	-0.117738
5.071	65.6631	13.0071	-1.61271	94.907	-0.117672
5.07933	65.7507	13.006	-1.61181	94.8987	-0.117606
5.08767	65.8297	13.0048	-1.61089	94.8902	-0.117539
5.096	65.9132	13.0037	-1.60997	94.8817	-0.117472
5.10433	65.9908	13.0025	-1.6091	94.8734	-0.117408
5.11267	66.0745	13.0014	-1.60818	94.8653	-0.117341
5.121	66.1536	13.0003	-1.60728	94.857	-0.117275
5.12933	66.2375	12.9992	-1.60643	94.8488	-0.117214
5.13767	66.3182	12.998	-1.60557	94.8406	-0.117151
5.146	66.3963	12.9969	-1.60471	94.8322	-0.117088
5.15433	66.4748	12.9957	-1.60382	94.8238	-0.117023
5.16267	66.5613	12.9946	-1.603	94.8151	-0.116964
5.171	66.6445	12.9934	-1.60217	94.8066	-0.116903
5.17933	66.7253	12.9923	-1.60135	94.7985	-0.116843
5.18767	66.8089	12.9911	-1.60048	94.7901	-0.11678
5.196	66.892	12.99	-1.59965	94.7819	-0.116719
5.20433	66.9692	12.9889	-1.59885	94.7737	-0.116661
5.21267	67.0525	12.9878	-1.59803	94.7655	-0.116601
5.221	67.1357	12.9866	-1.59722	94.7573	-0.116542
5.22933	67.2212	12.9855	-1.59645	94.7491	-0.116485
5.23767	67.306	12.9844	-1.59566	94.741	-0.116428
5.246	67.3851	12.9833	-1.59483	94.7331	-0.116367
5.25433	67.4664	12.9822	-1.59404	94.725	-0.116309
5.26267	67.5469	12.9811	-1.59329	94.7167	-0.116255
5.271	67.6329	12.98	-1.59256	94.7086	-0.116202
5.27933	67.7111	12.9788	-1.59182	94.7004	-0.116147
5.28767	67.7933	12.9777	-1.5911	94.692	-0.116095
5.296	67.875	12.9765	-1.59044	94.6837	-0.116047
5.30433	67.9618	12.9754	-1.58975	94.6754	-0.115996
5.31267	68.0403	12.9743	-1.58908	94.667	-0.115947
5.321	68.1244	12.9731	-1.58843	94.6586	-0.1159
5.32933	68.2063	12.9719	-1.58782	94.6501	-0.115856
5.33767	68.2848	12.9708	-1.58721	94.6416	-0.115811
5.346	68.3691	12.9696	-1.58664	94.6333	-0.11577
5.35433	68.4532	12.9684	-1.58612	94.6246	-0.115732
5.36267	68.5368	12.9673	-1.58562	94.616	-0.115695
5.371	68.6154	12.9661	-1.58509	94.6075	-0.115657
5.37933	68.696	12.9649	-1.58456	94.5989	-0.115618
5.38767	68.7798	12.9637	-1.58408	94.59	-0.115583
5.396	68.8587	12.9625	-1.58362	94.5813	-0.115549
5.40433	68.9456	12.9613	-1.58322	94.5727	-0.11552
5.41267	69.0267	12.9602	-1.58281	94.5642	-0.11549
5.421	69.1097	12.959	-1.58241	94.5558	-0.115461
5.42933	69.1919	12.9579	-1.58205	94.5473	-0.115435
5.43767	69.2685	12.9567	-1.58166	94.5386	-0.115406
5.446	69.3517	12.9555	-1.58132	94.53	-0.115382
5.45433	69.4372	12.9543	-1.58104	94.5212	-0.115361
5.46267	69.5219	12.9531	-1.5808	94.5124	-0.115343
5.471	69.6031	12.9519	-1.58058	94.5037	-0.115328
5.47933	69.6843	12.9507	-1.58035	94.4952	-0.115311
5.48767	69.7671	12.9495	-1.58012	94.4864	-0.115294
5.496	69.8458	12.9483	-1.57992	94.4776	-0.115279
5.50433	69.9284	12.9471	-1.57976	94.4687	-0.115268
5.51267	70.0137	12.9459	-1.57959	94.4597	-0.115255
5.521	70.0904	12.9446	-1.57949	94.4508	-0.115248
5.52933	70.177	12.9434	-1.57941	94.4416	-0.115242
5.53767	70.2564	12.9421	-1.57932	94.4327	-0.115235
5.546	70.3364	12.9409	-1.57919	94.4238	-0.115226
5.55433	70.4209	12.9397	-1.57908	94.4152	-0.115218
5.56267	70.5016	12.9385	-1.57899	94.4063	-0.115211
5.571	70.587	12.9373	-1.57897	94.3974	-0.11521
5.57933	70.6675	12.9361	-1.57896	94.3885	-0.11521
5.58767	70.7485	12.9349	-1.579	94.3796	-0.115212
5.596	70.8276	12.9336	-1.57901	94.3705	-0.115213
5.60433	70.9102	12.9324	-1.57905	94.3617	-0.115216
5.61267	70.992	12.9312	-1.57909	94.3529	-0.115219
5.621	71.0747	12.93	-1.57916	94.344	-0.115224
5.62933	71.1569	12.9288	-1.57928	94.335	-0.115233
5.63767	71.239	12.9275	-1.57941	94.3259	-0.115242
5.646	71.3264	12.9262	-1.57959	94.3167	-0.115255
5.65433	71.4107	12.925	-1.57974	94.3073	-0.115266
5.66267	71.4903	12.9237	-1.57992	94.2981	-0.115279
5.671	71.5699	12.9224	-1.58007	94.289	-0.11529
5.67933	71.6502	12.9212	-1.58025	94.2799	-0.115303
5.68767	71.7321	12.9199	-1.58043	94.2706	-0.115317
5.696	71.8144	12.9187	-1.58062	94.2615	-0.115331
5.70433	71.8964	12.9174	-1.58087	94.252	-0.115349
5.71267	71.9788	12.9161	-1.58111	94.2425	-0.115366
5.721	72.062	12.9148	-1.58135	94.2332	-0.115383
5.72933	72.1455	12.9135	-1.58159	94.2239	-0.115401
5.73767	72.2242	12.9123	-1.58184	94.2148	-0.115419
5.746	72.3097	12.911	-1.58208	94.2056	-0.115437
5.75433	72.3937	12.9097	-1.58234	94.1961	-0.115456
5.76267	72.476	12.9084	-1.58261	94.1868	-0.115475
5.771	72.5584	12.9072	-1.58292	94.1777	-0.115498
5.77933	72.6417	12.9059	-1.58324	94.1685	-0.115521
5.78767	72.7262	12.9047	-1.58349	94.1595	-0.115539
5.796	72.8074	12.9035	-1.58376	94.1506	-0.11556
5.80433	72.8875	12.9022	-1.58405	94.1414	-0.11558
5.81267	72.9694	12.9009	-1.58434	94.1321	-0.115602
5.821	73.0566	12.8997	-1.58464	94.1228	-0.115624
5.82933	73.1427	12.8984	-1.58496	94.1133	-0.115647
5.83767	73.2175	12.8971	-1.58534	94.1041	-0.115675
5.846	73.3076	12.8958	-1.58571	94.0948	-0.115702
5.85433	73.3827	12.8945	-1.58605	94.0853	-0.115727
5.86267	73.4679	12.8932	-1.58637	94.0758	-0.11575
5.871	73.5546	12.892	-1.58672	94.0666	-0.115775
5.87933	73.6299	12.8907	-1.58705	94.0571	-0.115799
5.88767	73.7107	12.8894	-1.58741	94.0476	-0.115826
5.896	73.7977	12.8881	-1.58777	94.0382	-0.115852
5.90433	73.8809	12.8868	-1.58815	94.0287	-0.11588
5.91267	73.9616	12.8855	-1.58851	94.0195	-0.115906
5.921	74.0434	12.8842	-1.58882	94.0101	-0.115929
5.92933	74.1277	12.8829	-1.58919	94.0007	-0.115956
5.93767	74.211	12.8817	-1.58951	93.9913	-0.115979
5.946	74.292	12.8803	-1.58985	93.9818	-0.116004
5.95433	74.3749	12.879	-1.59023	93.972	-0.116032
5.96267	74.4586	12.8777	-1.59064	93.9623	-0.116062
5.971	74.5394	12.8764	-1.59099	93.953	-0.116087
5.97933	74.6251	12.8751	-1.59136	93.9437	-0.116114
5.98767	74.7069	12.8738	-1.5917	93.934	-0.116139
5.996	74.7905	12.8725	-1.59208	93.9244	-0.116166
6.00433	74.8727	12.8712	-1.59245	93.9148	-0.116194
6.01267	74.949	12.8699	-1.5928	93.9054	-0.116219
6.021	75.0353	12.8686	-1.59317	93.896	-0.116246
6.02933	75.1236	12.8673	-1.59354	93.8867	-0.116273
6.03767	75.2039	12.866	-1.59389	93.8774	-0.116299
6.046	75.2916	12.8647	-1.59422	93.8679	-0.116323
6.05433	75.3733	12.8634	-1.59459	93.8584	-0.116349
6.06267	75.4577	12.8621	-1.59498	93.8487	-0.116378
6.071	75.5404	12.8608	-1.59537	93.8392	-0.116407
6.07933	75.618	12.8595	-1.59576	93.8299	-0.116435
6.08767	75.7014	12.8583	-1.59615	93.8206	-0.116463
6.096	75.7849	12.857	-1.59651	93.8112	-0.11649
6.10433	75.8679	12.8557	-1.59685	93.8017	-0.116515
6.11267	75.9532	12.8544	-1.59719	93.7923	-0.116539
6.121	76.0347	12.8531	-1.59754	93.7828	-0.116565
6.12933	76.1176	12.8518	-1.59796	93.7736	-0.116595
6.13767	76.1974	12.8505	-1.59838	93.7643	-0.116626
6.146	76.2843	12.8492	-1.59874	93.7548	-0.116652
6.15433	76.3666	12.8479	-1.59911	93.7453	-0.116679
6.16267	76.447	12.8466	-1.59945	93.7358	-0.116705
6.171	76.5336	12.8453	-1.59982	93.7262	-0.116731
6.17933	76.6142	12.844	-1.6002	93.7164	-0.116759
6.18767	76.6944	12.8427	-1.6006	93.7067	-0.116789
6.196	76.7795	12.8413	-1.601	93.6971	-0.116817
6.20433	76.8603	12.84	-1.60139	93.6874	-0.116846
6.21267	76.9438	12.8387	-1.60173	93.6776	-0.116871
6.221	77.0307	12.8373	-1.60207	93.668	-0.116896
6.22933	77.1133	12.836	-1.60241	93.6585	-0.11692
6.23767	77.1875	12.8347	-1.60274	93.6491	-0.116944
6.246	77.2812	12.8334	-1.6031	93.6394	-0.11697
6.25433	77.3617	12.8321	-1.60343	93.6294	-0.116995
6.26267	77.4439	12.8307	-1.6038	93.6198	-0.117022
6.271	77.5265	12.8294	-1.60415	93.6102	-0.117047
6.27933	77.6091	12.8281	-1.60453	93.6005	-0.117075
6.28767	77.6911	12.8268	-1.60489	93.5909	-0.117101
6.296	77.7709	12.8254	-1.60526	93.5812	-0.117128
6.30433	77.856	12.8241	-1.60559	93.5716	-0.117152
6.31267	77.9421	12.8228	-1.60596	93.5618	-0.117179
6.321	78.0221	12.8215	-1.60632	93.5522	-0.117206
6.32933	78.1059	12.8201	-1.60666	93.5426	-0.11723
6.33767	78.1881	12.8189	-1.607	93.5332	-0.117255
6.346	78.2673	12.8176	-1.60735	93.5238	-0.117281
6.35433	78.3559	12.8163	-1.6077	93.5142	-0.117306
6.36267	78.4397	12.8149	-1.60807	93.5046	-0.117333
6.371	78.5216	12.8136	-1.60837	93.4949	-0.117355
6.37933	78.6065	12.8123	-1.60869	93.4854	-0.117379
6.38767	78.6856	12.811	-1.60904	93.4759	-0.117404
6.396	78.771	12.8097	-1.60936	93.4665	-0.117428
6.40433	78.8531	12.8084	-1.60968	93.4571	-0.117451
6.41267	78.937	12.8071	-1.61001	93.4476	-0.117475
6.421	79.0214	12.8058	-1.61035	93.4382	-0.1175
6.42933	79.0976	12.8045	-1.61068	93.4283	-0.117523
6.43767	79.1783	12.8032	-1.61099	93.4186	-0.117546
6.446	79.2604	12.8018	-1.61128	93.409	-0.117567
6.45433	79.3514	12.8005	-1.61163	93.3995	-0.117593
6.46267	79.4312	12.7992	-1.61195	93.3899	-0.117617
6.471	79.5109	12.7979	-1.61229	93.3803	-0.117641
6.47933	79.5971	12.7966	-1.61264	93.3707	-0.117667
6.48767	79.6799	12.7953	-1.613	93.361	-0.117693
6.496	79.7639	12.7939	-1.61337	93.3513	-0.11772
6.50433	79.843	12.7926	-1.61374	93.3416	-0.117747
6.51267	79.9283	12.7913	-1.61407	93.3322	-0.117771
6.521	80.0107	12.7901	-1.61442	93.3229	-0.117797
6.52933	80.0921	12.7887	-1.61479	93.3132	-0.117824
6.53767	80.1777	12.7874	-1.61517	93.3035	-0.117852
6.546	80.2664	12.786	-1.61553	93.2938	-0.117878
6.55433	80.3447	12.7847	-1.61586	93.2841	-0.117902
6.56267	80.4291	12.7834	-1.61621	93.2744	-0.117927
6.571	80.5115	12.782	-1.61658	93.2645	-0.117954
6.57933	80.5951	12.7807	-1.61692	93.2547	-0.117979
6.58767	80.6758	12.7793	-1.6172	93.2448	-0.118
6.596	80.7647	12.778	-1.61749	93.235	-0.118021
6.60433	80.8443	12.7766	-1.61783	93.2251	-0.118045
6.61267	80.9296	12.7753	-1.61813	93.2154	-0.118068
6.621	81.0187	12.774	-1.61846	93.2058	-0.118091
6.62933	81.097	12.7727	-1.61875	93.1962	-0.118113
6.63767	81.1782	12.7714	-1.61906	93.1866	-0.118136
6.646	81.2652	12.7701	-1.61935	93.1771	-0.118156
6.65433	81.3405	12.7687	-1.61961	93.1675	-0.118175
6.66267	81.4256	12.7674	-1.61991	93.1579	-0.118197
6.671	81.5069	12.7661	-1.62026	93.1483	-0.118223
6.67933	81.5928	12.7648	-1.62061	93.1387	-0.118248
6.68767	81.6771	12.7635	-1.62089	93.1289	-0.118269
6.696	81.7567	12.7621	-1.62115	93.1192	-0.118287
6.70433	81.8377	12.7608	-1.62137	93.1095	-0.118303
6.71267	81.9204	12.7595	-1.62167	93.0998	-0.118326
6.721	82.0057	12.7581	-1.62198	93.09	-0.118348
6.72933	82.0947	12.7568	-1.62226	93.0802	-0.118368
6.73767	82.1724	12.7554	-1.62254	93.0705	-0.118389
6.746	82.2564	12.7541	-1.62279	93.0609	-0.118408
6.75433	82.3398	12.7528	-1.62301	93.0512	-0.118423
6.76267	82.4224	12.7515	-1.62321	93.0418	-0.118438
6.771	82.507	12.7502	-1.62343	93.0323	-0.118454
6.77933	82.5886	12.7489	-1.62371	93.0229	-0.118474
6.78767	82.6699	12.7476	-1.62397	93.0134	-0.118493
6.796	82.7549	12.7463	-1.62416	93.0038	-0.118507
6.80433	82.8374	12.745	-1.62434	92.9943	-0.11852
6.81267	82.9222	12.7437	-1.62454	92.9849	-0.118535
6.821	83.0028	12.7424	-1.62475	92.9753	-0.11855
6.82933	83.0866	12.7411	-1.62492	92.9658	-0.118562
6.83767	83.17	12.7398	-1.62511	92.9563	-0.118576
6.846	83.2529	12.7385	-1.62532	92.9466	-0.118592
6.85433	83.3358	12.7372	-1.6255	92.937	-0.118605
6.86267	83.4129	12.7358	-1.62565	92.9275	-0.118616
6.871	83.5032	12.7346	-1.62578	92.918	-0.118625
6.87933	83.5875	12.7332	-1.62593	92.9083	-0.118637
6.88767	83.6692	12.7319	-1.62608	92.8987	-0.118648
6.896	83.7572	12.7306	-1.62619	92.8892	-0.118656
6.90433	83.8383	12.7293	-1.6263	92.8797	-0.118663
6.91267	83.9223	12.728	-1.62638	92.8705	-0.118669
6.921	84.0051	12.7267	-1.62645	92.8611	-0.118675
6.92933	84.0842	12.7255	-1.62655	92.8517	-0.118682
6.93767	84.1685	12.7242	-1.62663	92.8424	-0.118688
6.946	84.2504	12.7229	-1.62671	92.8331	-0.118693
6.95433	84.3337	12.7216	-1.62677	92.8236	-0.118698
6.96267	84.4154	12.7203	-1.62681	92.8142	-0.118701
6.971	84.5062	12.7191	-1.62685	92.805	-0.118703
6.97933	84.5865	12.7178	-1.62689	92.7957	-0.118706
6.98767	84.6731	12.7165	-1.62692	92.7865	-0.118709
6.996	84.7534	12.7152	-1.62696	92.7771	-0.118712
7.00433	84.8381	12.714	-1.62698	92.7678	-0.118713
7.01267	84.9243	12.7127	-1.62694	92.7583	-0.11871
7.021	85.0048	12.7113	-1.62689	92.7486	-0.118706
7.02933	85.0884	12.71	-1.62684	92.7392	-0.118703
7.03767	85.1716	12.7087	-1.62681	92.7297	-0.1187
7.046	85.2517	12.7074	-1.62675	92.7201	-0.118696
7.05433	85.3379	12.7061	-1.62667	92.7106	-0.11869
7.06267	85.4215	12.7048	-1.62656	92.7012	-0.118683
7.071	85.5008	12.7035	-1.62647	92.6916	-0.118676
7.07933	85.5823	12.7022	-1.62638	92.6822	-0.118669
7.08767	85.6736	12.7009	-1.62623	92.6725	-0.118658
7.096	85.7552	12.6996	-1.62613	92.6632	-0.118651
7.10433	85.8384	12.6983	-1.62601	92.6538	-0.118642
7.11267	85.9238	12.6971	-1.62586	92.6446	-0.118631
7.121	86.0038	12.6958	-1.6257	92.6355	-0.11862
7.12933	86.0894	12.6946	-1.62554	92.6267	-0.118608
7.13767	86.1759	12.6933	-1.62539	92.6173	-0.118597
7.146	86.2588	12.6921	-1.62525	92.6081	-0.118587
7.15433	86.3422	12.6909	-1.62505	92.5993	-0.118572
7.16267	86.4263	12.6896	-1.62482	92.5902	-0.118555
7.171	86.5057	12.6884	-1.62462	92.5814	-0.118541
7.17933	86.5876	12.6872	-1.62437	92.5724	-0.118523
7.18767	86.6691	12.686	-1.62416	92.5634	-0.118507
7.196	86.7579	12.6847	-1.62395	92.5544	-0.118492
7.20433	86.8406	12.6835	-1.62372	92.5452	-0.118475
7.21267	86.9248	12.6822	-1.62347	92.5359	-0.118457
7.221	87.0109	12.6809	-1.62319	92.5268	-0.118436
7.22933	87.0905	12.6797	-1.6229	92.5175	-0.118415
7.23767	87.1767	12.6784	-1.62263	92.508	-0.118396
7.246	87.2636	12.6771	-1.62239	92.4988	-0.118378
7.25433	87.3463	12.6759	-1.62213	92.4897	-0.118359
7.26267	87.424	12.6746	-1.62187	92.4805	-0.11834
7.271	87.5115	12.6733	-1.62158	92.4713	-0.118319
7.27933	87.5938	12.6721	-1.62125	92.4622	-0.118295
7.28767	87.6737	12.6708	-1.62094	92.4532	-0.118272
7.296	87.756	12.6697	-1.62063	92.4444	-0.11825
7.30433	87.8445	12.6684	-1.62031	92.4357	-0.118226
7.31267	87.9259	12.6672	-1.61994	92.4269	-0.1182
7.321	88.0095	12.666	-1.61958	92.4179	-0.118173
7.32933	88.0917	12.6648	-1.61922	92.409	-0.118147
7.33767	88.1756	12.6636	-1.61886	92.4001	-0.118121
7.346	88.2589	12.6623	-1.6185	92.3912	-0.118094
7.35433	88.345	12.6612	-1.61813	92.3825	-0.118067
7.36267	88.427	12.66	-1.6178	92.3737	-0.118043
7.371	88.5073	12.6588	-1.61742	92.365	-0.118015
7.37933	88.5929	12.6575	-1.61705	92.3557	-0.117989
7.38767	88.6732	12.6563	-1.61672	92.3468	-0.117964
7.396	88.7593	12.6551	-1.6164	92.338	-0.117941
7.40433	88.8386	12.6538	-1.61603	92.3291	-0.117914
7.41267	88.925	12.6526	-1.61562	92.32	-0.117884
7.421	89.0086	12.6514	-1.61519	92.311	-0.117852
7.42933	89.093	12.6502	-1.61478	92.3022	-0.117823
7.43767	89.1804	12.6489	-1.61435	92.2932	-0.117792
7.446	89.2608	12.6477	-1.61389	92.2841	-0.117758
7.45433	89.3427	12.6464	-1.61346	92.2751	-0.117726
7.46267	89.4296	12.6452	-1.61299	92.2663	-0.117692
7.471	89.5107	12.644	-1.61251	92.2573	-0.117657
7.47933	89.5922	12.6428	-1.61203	92.2482	-0.117622
7.48767	89.6797	12.6416	-1.61158	92.2395	-0.117589
7.496	89.7653	12.6404	-1.61115	92.2309	-0.117558
7.50433	89.8505	12.6392	-1.61075	92.2223	-0.117529
7.51267	89.9318	12.638	-1.61027	92.2136	-0.117494
7.521	90.0131	12.6368	-1.60983	92.2049	-0.117462
7.52933	90.0963	12.6356	-1.60938	92.1962	-0.117428
7.53767	90.1793	12.6344	-1.60892	92.1875	-0.117396
7.546	90.256	12.6333	-1.60846	92.1789	-0.117362
7.55433	90.3444	12.6321	-1.60796	92.1703	-0.117326
7.56267	90.4281	12.6309	-1.60749	92.1617	-0.117291
7.571	90.5141	12.6297	-1.60698	92.1532	-0.117254
7.57933	90.5957	12.6285	-1.60646	92.1443	-0.117216
7.58767	90.6829	12.6273	-1.60594	92.1355	-0.117178
7.596	90.7661	12.6261	-1.60542	92.1268	-0.11714
7.60433	90.8502	12.6249	-1.60486	92.118	-0.117099
7.61267	90.9297	12.6237	-1.60434	92.1093	-0.117061
7.621	91.0152	12.6225	-1.60379	92.1007	-0.117021
7.62933	91.098	12.6214	-1.60326	92.0921	-0.116982
7.63767	91.1831	12.6202	-1.60274	92.0833	-0.116944
7.646	91.2665	12.619	-1.60217	92.0747	-0.116903
7.65433	91.3528	12.6178	-1.60163	92.066	-0.116863
7.66267	91.4364	12.6166	-1.60108	92.0574	-0.116823
7.671	91.5207	12.6154	-1.60052	92.0486	-0.116782
7.67933	91.6064	12.6142	-1.59999	92.04	-0.116744
7.68767	91.6841	12.613	-1.59942	92.0315	-0.116702
7.696	91.7699	12.6119	-1.59887	92.0228	-0.116662
7.70433	91.8574	12.6107	-1.59829	92.0141	-0.11662
7.71267	91.9338	12.6095	-1.59774	92.0054	-0.11658
7.721	92.0212	12.6083	-1.59719	91.9968	-0.11654
7.72933	92.0997	12.6071	-1.59663	91.9883	-0.116498
7.73767	92.1893	12.6059	-1.59606	91.9797	-0.116457
7.746	92.2703	12.6048	-1.59549	91.9711	-0.116415
7.75433	92.3589	12.6036	-1.59489	91.9628	-0.116371
7.76267	92.4424	12.6025	-1.59427	91.9543	-0.116326
7.771	92.5261	12.6013	-1.59368	91.9458	-0.116284
7.77933	92.6059	12.6002	-1.59306	91.9374	-0.116238
7.78767	92.6893	12.599	-1.59245	91.9289	-0.116194
7.796	92.7724	12.5978	-1.59181	91.9204	-0.116147
7.80433	92.8569	12.5967	-1.59115	91.9119	-0.116098
7.81267	92.9396	12.5955	-1.59053	91.9036	-0.116054
7.821	93.0256	12.5944	-1.58988	91.8955	-0.116006
7.82933	93.1084	12.5933	-1.58922	91.8871	-0.115958
7.83767	93.1945	12.5921	-1.58861	91.8788	-0.115914
7.846	93.2753	12.591	-1.58796	91.8705	-0.115866
7.85433	93.3592	12.5898	-1.58734	91.8621	-0.115821
7.86267	93.4449	12.5887	-1.58669	91.8539	-0.115773
7.871	93.5283	12.5876	-1.58602	91.8456	-0.115724
7.87933	93.61	12.5865	-1.58533	91.8374	-0.115674
7.88767	93.6947	12.5854	-1.58465	91.8293	-0.115624
7.896	93.7741	12.5842	-1.58393	91.8211	-0.115572
7.90433	93.8588	12.5831	-1.58324	91.8129	-0.115522
7.91267	93.9433	12.582	-1.58254	91.8046	-0.115471
7.921	94.0261	12.5808	-1.58182	91.7963	-0.115418
7.92933	94.1092	12.5797	-1.58112	91.7881	-0.115367
7.93767	94.1957	12.5786	-1.58038	91.7799	-0.115313
7.946	94.2797	12.5774	-1.57964	91.7715	-0.115259
7.95433	94.3691	12.5763	-1.57891	91.7633	-0.115206
7.96267	94.4495	12.5752	-1.57821	91.755	-0.115154
7.971	94.5306	12.574	-1.57749	91.7467	-0.115102
7.97933	94.6179	12.5729	-1.57676	91.7384	-0.115049
7.98767	94.7017	12.5717	-1.576	91.73	-0.114993
7.996	94.787	12.5706	-1.57523	91.7218	-0.114937
8.00433	94.8686	12.5695	-1.57448	91.7137	-0.114883
8.01267	94.9478	12.5684	-1.57373	91.7057	-0.114827
8.021	95.03	12.5673	-1.57295	91.6976	-0.11477
8.02933	95.1196	12.5662	-1.57216	91.6898	-0.114713
8.03767	95.2053	12.5651	-1.57135	91.6817	-0.114654
8.046	95.2859	12.564	-1.57053	91.6736	-0.114594
8.05433	95.3708	12.5629	-1.56967	91.6658	-0.114532
8.06267	95.4543	12.5619	-1.56883	91.658	-0.11447
8.071	95.5356	12.5608	-1.568	91.6502	-0.11441
8.07933	95.6235	12.5597	-1.56716	91.6423	-0.114348
8.08767	95.7054	12.5586	-1.56624	91.6345	-0.114281
8.096	95.7887	12.5576	-1.56535	91.6265	-0.114216
8.10433	95.8702	12.5565	-1.56445	91.6186	-0.11415
8.11267	95.9538	12.5554	-1.56354	91.6107	-0.114084
8.121	96.0425	12.5543	-1.56263	91.6031	-0.114018
8.12933	96.1286	12.5533	-1.56171	91.5955	-0.113951
8.13767	96.2102	12.5522	-1.56079	91.5877	-0.113883
8.146	96.2983	12.5511	-1.55985	91.5796	-0.113815
8.15433	96.3762	12.55	-1.55888	91.5715	-0.113744
8.16267	96.4575	12.5489	-1.55789	91.5635	-0.113672
8.171	96.5451	12.5478	-1.55695	91.5557	-0.113603
8.17933	96.6275	12.5468	-1.55596	91.5478	-0.113531
8.18767	96.7073	12.5457	-1.555	91.5402	-0.113461
8.196	96.7954	12.5447	-1.55401	91.5325	-0.113388
8.20433	96.8812	12.5436	-1.55296	91.5249	-0.113312
8.21267	96.9712	12.5426	-1.55189	91.5173	-0.113234
8.221	97.0462	12.5416	-1.55083	91.5098	-0.113157
8.22933	97.1282	12.5406	-1.54974	91.5025	-0.113077
8.23767	97.2132	12.5396	-1.54865	91.4952	-0.112998
8.246	97.2958	12.5386	-1.54757	91.4879	-0.112919
8.25433	97.3816	12.5376	-1.54642	91.4806	-0.112835
8.26267	97.4679	12.5366	-1.54527	91.4734	-0.112751
8.271	97.5538	12.5356	-1.54405	91.4661	-0.112662
8.27933	97.6352	12.5345	-1.54284	91.4586	-0.112574
8.28767	97.7173	12.5335	-1.54166	91.4511	-0.112488
8.296	97.8	12.5325	-1.54045	91.4437	-0.112399
8.30433	97.8843	12.5315	-1.53925	91.4363	-0.112312
8.31267	97.97	12.5304	-1.53804	91.4287	-0.112224
8.321	98.0545	12.5295	-1.53678	91.4215	-0.112131
8.32933	98.1413	12.5285	-1.53549	91.4142	-0.112038
8.33767	98.2254	12.5275	-1.5342	91.407	-0.111943
8.346	98.3135	12.5265	-1.5329	91.3997	-0.111849
8.35433	98.392	12.5255	-1.53158	91.3924	-0.111752
8.36267	98.4806	12.5245	-1.53025	91.3852	-0.111655
8.371	98.5659	12.5235	-1.52888	91.378	-0.111555
8.37933	98.6435	12.5225	-1.52751	91.3708	-0.111455
8.38767	98.7332	12.5215	-1.52609	91.3638	-0.111352
8.396	98.8153	12.5206	-1.52468	91.3572	-0.111249
8.40433	98.9005	12.5197	-1.52324	91.3503	-0.111144
8.41267	98.9865	12.5188	-1.52178	91.3434	-0.111037
8.421	99.0714	12.5178	-1.52032	91.3366	-0.11093
8.42933	99.1527	12.5169	-1.5188	91.33	-0.11082
8.43767	99.2404	12.516	-1.51729	91.3232	-0.11071
8.446	99.323	12.5151	-1.51576	91.3165	-0.110598
8.45433	99.4113	12.5142	-1.51423	91.3098	-0.110486
8.46267	99.4931	12.5132	-1.51268	91.3033	-0.110373
8.471	99.575	12.5123	-1.51111	91.2967	-0.110259
8.47933	99.6598	12.5114	-1.50951	91.2901	-0.110142
8.48767	99.7503	12.5106	-1.50794	91.2836	-0.110027
8.496	99.8301	12.5097	-1.50637	91.277	-0.109913
8.50433	99.9146	12.5087	-1.50476	91.2704	-0.109796
8.51267	99.9999	12.5079	-1.50316	91.2639	-0.109678
8.521	100.083	12.507	-1.50153	91.2577	-0.10956
8.52933	100.164	12.5061	-1.49993	91.2512	-0.109443
8.53767	100.25	12.5052	-1.49828	91.2448	-0.109322
8.546	100.341	12.5043	-1.49659	91.2383	-0.109199
8.55433	100.424	12.5035	-1.4949	91.2318	-0.109076
8.56267	100.507	12.5026	-1.4932	91.2255	-0.108951
8.571	100.594	12.5017	-1.49149	91.2191	-0.108827
8.57933	100.679	12.5009	-1.48976	91.2129	-0.108701
8.58767	100.767	12.5	-1.48802	91.2067	-0.108573
8.596	100.852	12.4992	-1.48629	91.2005	-0.108448
8.60433	100.932	12.4983	-1.48457	91.1941	-0.108322
8.61267	101.021	12.4975	-1.48283	91.188	-0.108195
8.621	101.103	12.4966	-1.48109	91.1821	-0.108068
8.62933	101.186	12.4959	-1.47935	91.1763	-0.107941
8.63767	101.275	12.495	-1.47763	91.17	-0.107815
8.646	101.359	12.4941	-1.47592	91.1639	-0.107691
8.65433	101.441	12.4933	-1.47418	91.1577	-0.107564
8.66267	101.53	12.4924	-1.47241	91.1514	-0.107435
8.671	101.614	12.4916	-1.47066	91.1453	-0.107307
8.67933	101.695	12.4908	-1.46887	91.1391	-0.107176
8.68767	101.782	12.4899	-1.46713	91.133	-0.10705
8.696	101.869	12.4891	-1.46534	91.1269	-0.106919
8.70433	101.95	12.4883	-1.46354	91.1209	-0.106788
8.71267	102.037	12.4874	-1.46176	91.1149	-0.106658
8.721	102.121	12.4866	-1.45997	91.109	-0.106527
8.72933	102.205	12.4858	-1.45813	91.1031	-0.106393
8.73767	102.29	12.485	-1.45627	91.0972	-0.106257
8.746	102.372	12.4842	-1.45444	91.0915	-0.106123
8.75433	102.459	12.4834	-1.45261	91.0855	-0.10599
8.76267	102.547	12.4826	-1.4508	91.0798	-0.105858
8.771	102.629	12.4818	-1.44893	91.0741	-0.105721
8.77933	102.712	12.481	-1.44713	91.0682	-0.10559
8.78767	102.799	12.4803	-1.44533	91.0626	-0.105459
8.796	102.885	12.4794	-1.4435	91.0566	-0.105326
8.80433	102.966	12.4786	-1.44165	91.0507	-0.10519
8.81267	103.057	12.4779	-1.4398	91.045	-0.105056
8.821	103.136	12.4771	-1.43799	91.0393	-0.104923
8.82933	103.222	12.4763	-1.43616	91.0335	-0.10479
8.83767	103.31	12.4755	-1.43433	91.0278	-0.104656
8.846	103.392	12.4747	-1.4325	91.0219	-0.104522
8.85433	103.472	12.4739	-1.43065	91.0162	-0.104388
8.86267	103.56	12.4731	-1.42874	91.0106	-0.104248
8.871	103.648	12.4724	-1.42688	91.005	-0.104113
8.87933	103.728	12.4716	-1.42504	90.9992	-0.103978
8.88767	103.813	12.4708	-1.42322	90.9936	-0.103846
8.896	103.902	12.4701	-1.42143	90.9881	-0.103715
8.90433	103.99	12.4693	-1.41963	90.9824	-0.103584
8.91267	104.072	12.4685	-1.4178	90.9769	-0.10345
8.921	104.158	12.4678	-1.41599	90.9715	-0.103318
8.92933	104.245	12.467	-1.41418	90.9661	-0.103186
8.93767	104.326	12.4663	-1.41236	90.9606	-0.103053
8.946	104.412	12.4655	-1.41056	90.9549	-0.102922
8.95433	104.495	12.4648	-1.40874	90.9495	-0.102789
8.96267	104.58	12.464	-1.40691	90.9442	-0.102655
8.971	104.669	12.4633	-1.4051	90.9388	-0.102523
8.97933	104.754	12.4626	-1.40328	90.9333	-0.102391
8.98767	104.833	12.4618	-1.40146	90.9281	-0.102258
8.996	104.924	12.4611	-1.39968	90.9225	-0.102128
9.00433	105.009	12.4603	-1.39784	90.9168	-0.101994
9.01267	105.095	12.4595	-1.39604	90.9114	-0.101863
9.021	105.183	12.4588	-1.39425	90.906	-0.101732
9.02933	105.262	12.4581	-1.39247	90.9006	-0.101602
9.03767	105.35	12.4573	-1.3907	90.8953	-0.101473
9.046	105.433	12.4566	-1.38891	90.8898	-0.101342
9.05433	105.519	12.4559	-1.38709	90.8845	-0.10121
9.06267	105.608	12.4551	-1.38529	90.879	-0.101078
9.071	105.685	12.4544	-1.38353	90.8736	-0.100949
9.07933	105.771	12.4536	-1.38177	90.8684	-0.100821
9.08767	105.856	12.4529	-1.38004	90.8633	-0.100695
9.096	105.943	12.4522	-1.37826	90.858	-0.100565
9.10433	106.026	12.4515	-1.37648	90.8528	-0.100436
9.11267	106.111	12.4508	-1.37472	90.8477	-0.100307
9.121	106.197	12.4501	-1.37297	90.8423	-0.100179
9.12933	106.281	12.4493	-1.37125	90.8369	-0.100053
9.13767	106.365	12.4486	-1.36952	90.8315	-0.0999277
9.146	106.452	12.4479	-1.3678	90.8264	-0.0998021
9.15433	106.537	12.4472	-1.36608	90.8211	-0.0996762
9.16267	106.621	12.4465	-1.36433	90.8159	-0.0995489
9.171	106.705	12.4457	-1.36262	90.8107	-0.0994239
9.17933	106.789	12.445	-1.36091	90.8056	-0.0992994
9.18767	106.875	12.4443	-1.35922	90.8003	-0.099176
9.196	106.959	12.4436	-1.35754	90.7952	-0.0990533
9.20433	107.047	12.4429	-1.35584	90.7901	-0.0989292
9.21267	107.128	12.4422	-1.35413	90.7851	-0.0988045
9.221	107.211	12.4415	-1.35245	90.78	-0.0986822
9.22933	107.299	12.4408	-1.35078	90.7749	-0.0985603
9.23767	107.386	12.4401	-1.34905	90.7697	-0.0984341
9.246	107.47	12.4394	-1.34736	90.7646	-0.0983109
9.25433	107.554	12.4387	-1.34566	90.7595	-0.0981865
9.26267	107.639	12.438	-1.34398	90.7543	-0.098064
9.271	107.728	12.4373	-1.34228	90.749	-0.0979401
9.27933	107.805	12.4365	-1.34061	90.7436	-0.0978178
9.28767	107.898	12.4358	-1.33892	90.7384	-0.097695
9.296	107.983	12.4351	-1.33728	90.7333	-0.0975749
9.30433	108.066	12.4344	-1.33561	90.7282	-0.0974531
9.31267	108.15	12.4338	-1.33392	90.7233	-0.0973297
9.321	108.236	12.4331	-1.3323	90.7185	-0.0972119
9.32933	108.32	12.4324	-1.33069	90.7136	-0.0970943
9.33767	108.409	12.4318	-1.32908	90.7087	-0.0969768
9.346	108.494	12.4311	-1.32744	90.7037	-0.0968569
9.35433	108.578	12.4304	-1.32584	90.6988	-0.0967406
9.36267	108.658	12.4298	-1.32427	90.694	-0.0966254
9.371	108.749	12.4291	-1.32268	90.689	-0.0965099
9.37933	108.826	12.4284	-1.32108	90.6841	-0.096393
9.38767	108.916	12.4277	-1.31949	90.6791	-0.096277
9.396	108.997	12.427	-1.31792	90.6742	-0.0961624
9.40433	109.083	12.4264	-1.31632	90.6694	-0.0960459
9.41267	109.172	12.4257	-1.31472	90.6645	-0.0959288
9.421	109.257	12.425	-1.31315	90.6596	-0.095814
9.42933	109.34	12.4244	-1.31159	90.6548	-0.0957002
9.43767	109.428	12.4237	-1.31001	90.6499	-0.0955849
9.446	109.511	12.423	-1.30844	90.6451	-0.0954708
9.45433	109.594	12.4224	-1.30689	90.6403	-0.0953578
9.46267	109.683	12.4217	-1.30533	90.6353	-0.0952435
9.471	109.768	12.4211	-1.30377	90.6306	-0.0951302
9.47933	109.85	12.4204	-1.30224	90.6255	-0.0950184
9.48767	109.939	12.4197	-1.30075	90.6205	-0.0949093
9.496	110.022	12.419	-1.29925	90.6155	-0.0948
9.50433	110.108	12.4183	-1.29772	90.6108	-0.0946883
9.51267	110.188	12.4177	-1.29621	90.6059	-0.0945783
9.521	110.27	12.417	-1.2947	90.6011	-0.094468
9.52933	110.36	12.4163	-1.29319	90.596	-0.0943582
9.53767	110.44	12.4156	-1.2917	90.5909	-0.094249
9.546	110.521	12.415	-1.29021	90.5861	-0.0941402
9.55433	110.609	12.4143	-1.28872	90.5813	-0.0940316
9.56267	110.698	12.4137	-1.2872	90.5765	-0.093921
9.571	110.779	12.413	-1.28569	90.5719	-0.0938109
9.57933	110.868	12.4124	-1.28419	90.5672	-0.0937011
9.58767	110.957	12.4117	-1.28273	90.5625	-0.0935945
9.596	111.037	12.4111	-1.28124	90.5578	-0.0934863
9.60433	111.122	12.4104	-1.27977	90.553	-0.0933787
9.61267	111.204	12.4098	-1.27829	90.5483	-0.0932708
9.621	111.293	12.4092	-1.27681	90.5437	-0.0931626
9.62933	111.375	12.4085	-1.27536	90.5391	-0.0930567
9.63767	111.46	12.4079	-1.27393	90.5345	-0.0929529
9.646	111.543	12.4072	-1.27252	90.5298	-0.0928495
9.65433	111.631	12.4066	-1.2711	90.5251	-0.0927465
9.66267	111.712	12.406	-1.26968	90.5206	-0.0926423
9.671	111.8	12.4053	-1.26824	90.5158	-0.0925375
9.67933	111.885	12.4047	-1.26684	90.5112	-0.0924352
9.68767	111.97	12.404	-1.26548	90.5065	-0.0923359
9.696	112.057	12.4034	-1.2641	90.502	-0.0922357
9.70433	112.138	12.4028	-1.26276	90.4974	-0.0921377
9.71267	112.226	12.4022	-1.26142	90.4926	-0.0920399
9.721	112.311	12.4015	-1.26	90.4878	-0.0919365
9.72933	112.398	12.4008	-1.2586	90.483	-0.0918345
9.73767	112.48	12.4002	-1.2572	90.4783	-0.0917316
9.746	112.564	12.3995	-1.25585	90.4734	-0.0916331
9.75433	112.649	12.3988	-1.25451	90.4685	-0.0915354
9.76267	112.733	12.3982	-1.25317	90.4638	-0.091438
9.771	112.816	12.3976	-1.2518	90.4593	-0.091338
9.77933	112.904	12.397	-1.25043	90.4549	-0.0912378
9.78767	112.99	12.3964	-1.24906	90.4504	-0.0911381
9.796	113.074	12.3957	-1.24771	90.4459	-0.0910396
9.80433	113.162	12.3951	-1.24639	90.4415	-0.0909433
9.81267	113.241	12.3945	-1.24507	90.437	-0.090847
9.821	113.328	12.3939	-1.24373	90.4323	-0.0907494
9.82933	113.411	12.3933	-1.24239	90.4278	-0.0906511
9.83767	113.498	12.3927	-1.24103	90.4234	-0.0905522
9.846	113.585	12.392	-1.23969	90.4185	-0.0904542
9.85433	113.671	12.3913	-1.2384	90.4136	-0.0903605
9.86267	113.755	12.3907	-1.23712	90.4088	-0.0902668
9.871	113.834	12.39	-1.23581	90.4042	-0.0901712
9.87933	113.92	12.3894	-1.23452	90.3997	-0.090077
9.88767	114.007	12.3888	-1.23324	90.3952	-0.0899834
9.896	114.093	12.3882	-1.23198	90.3908	-0.0898918
9.90433	114.177	12.3876	-1.23072	90.3864	-0.0897996
9.91267	114.265	12.387	-1.22944	90.382	-0.0897064
9.921	114.343	12.3864	-1.2282	90.3776	-0.0896157
9.92933	114.428	12.3858	-1.22696	90.3733	-0.0895253
9.93767	114.508	12.3852	-1.22569	90.3691	-0.0894332
9.946	114.594	12.3846	-1.22446	90.3648	-0.0893429
9.95433	114.685	12.3841	-1.22325	90.3606	-0.0892548
9.96267	114.772	12.3835	-1.22201	90.3563	-0.0891644
9.971	114.857	12.3829	-1.22082	90.3519	-0.0890772
9.97933	114.942	12.3823	-1.21962	90.3476	-0.0889899
9.98767	115.023	12.3817	-1.21844	90.3433	-0.0889036
9.996	115.108	12.3811	-1.21727	90.3389	-0.0888184
10.0043	115.191	12.3804	-1.21607	90.3343	-0.0887308
10.0127	115.277	12.3798	-1.21488	90.3298	-0.0886444
10.021	115.36	12.3792	-1.21368	90.3253	-0.0885566
10.0293	115.449	12.3786	-1.21246	90.3209	-0.0884675
10.0377	115.53	12.378	-1.21126	90.3161	-0.0883796
10.046	115.615	12.3773	-1.21008	90.3116	-0.0882941
10.0543	115.701	12.3767	-1.20888	90.3071	-0.0882061
10.0627	115.785	12.3761	-1.20767	90.3028	-0.0881181
10.071	115.869	12.3755	-1.20649	90.2985	-0.0880317
10.0793	115.955	12.375	-1.20533	90.2942	-0.0879472
10.0877	116.04	12.3744	-1.20417	90.2901	-0.0878627
10.096	116.129	12.3738	-1.203	90.2861	-0.0877773
10.1043	116.209	12.3733	-1.20187	90.2818	-0.0876947
10.1127	116.293	12.3727	-1.20074	90.2774	-0.0876125
10.121	116.381	12.3721	-1.1996	90.2731	-0.0875294
10.1293	116.463	12.3714	-1.19846	90.2685	-0.0874458
10.1377	116.544	12.3708	-1.19734	90.2642	-0.0873641
10.146	116.631	12.3702	-1.19624	90.2597	-0.0872841
10.1543	116.719	12.3696	-1.19512	90.2554	-0.0872024
10.1627	116.805	12.369	-1.19397	90.251	-0.0871185
10.171	116.885	12.3684	-1.19282	90.2464	-0.0870341
10.1793	116.974	12.3678	-1.19168	90.242	-0.0869513
10.1877	117.054	12.3672	-1.19057	90.2376	-0.0868703
10.196	117.143	12.3666	-1.18947	90.2332	-0.0867903
10.2043	117.228	12.366	-1.18838	90.2289	-0.0867102
10.2127	117.311	12.3654	-1.18729	90.2246	-0.0866307
10.221	117.398	12.3648	-1.18618	90.2204	-0.0865498
10.2293	117.484	12.3642	-1.18508	90.216	-0.0864698
10.2377	117.565	12.3637	-1.18404	90.2118	-0.0863937
10.246	117.646	12.3631	-1.18301	90.2075	-0.0863184
10.2543	117.732	12.3625	-1.18198	90.2033	-0.0862435
10.2627	117.819	12.3619	-1.18094	90.1991	-0.0861676
10.271	117.903	12.3613	-1.17988	90.1949	-0.0860903
10.2793	117.984	12.3608	-1.17883	90.1906	-0.0860137
10.2877	118.068	12.3602	-1.17777	90.1864	-0.085936
10.296	118.154	12.3596	-1.17672	90.1822	-0.0858595
10.3043	118.24	12.359	-1.17572	90.1779	-0.0857866
10.3127	118.323	12.3584	-1.17467	90.1737	-0.0857102
10.321	118.409	12.3578	-1.17362	90.1692	-0.0856339
10.3293	118.494	12.3573	-1.17261	90.1651	-0.08556
10.3377	118.58	12.3567	-1.17159	90.1609	-0.0854852
10.346	118.665	12.3561	-1.1706	90.1565	-0.0854129
10.3543	118.748	12.3555	-1.16957	90.1524	-0.085338
10.3627	118.835	12.355	-1.16855	90.1482	-0.0852633
10.371	118.918	12.3544	-1.16758	90.1441	-0.0851928
10.3793	118.999	12.3538	-1.1666	90.1398	-0.0851216
10.3877	119.081	12.3532	-1.1656	90.1355	-0.085048
10.396	119.164	12.3526	-1.16464	90.1313	-0.0849783
10.4043	119.253	12.352	-1.16368	90.127	-0.0849082
10.4127	119.342	12.3514	-1.16269	90.1227	-0.0848362
10.421	119.423	12.3509	-1.16173	90.1185	-0.0847663
10.4293	119.504	12.3503	-1.16078	90.1144	-0.0846965
10.4377	119.595	12.3497	-1.15986	90.1101	-0.0846292
10.446	119.679	12.3491	-1.15894	90.1059	-0.0845624
10.4543	119.76	12.3486	-1.15799	90.1016	-0.0844931
10.4627	119.847	12.348	-1.15707	90.0974	-0.084426
10.471	119.933	12.3474	-1.15618	90.0932	-0.0843608
10.4793	120.018	12.3468	-1.15523	90.0891	-0.0842915
10.4877	120.104	12.3463	-1.1543	90.0848	-0.0842235
10.496	120.185	12.3457	-1.15338	90.0805	-0.0841565
10.5043	120.267	12.3451	-1.15248	90.0762	-0.0840908
10.5127	120.352	12.3445	-1.15156	90.0721	-0.0840239
10.521	120.434	12.344	-1.15068	90.068	-0.0839597
10.5293	120.517	12.3434	-1.14978	90.064	-0.0838943
10.5377	120.604	12.3428	-1.14891	90.0599	-0.0838305
10.546	120.69	12.3423	-1.14798	90.0557	-0.0837629
10.5543	120.775	12.3417	-1.14705	90.0514	-0.0836949
10.5627	120.86	12.3411	-1.14617	90.0472	-0.0836308
10.571	120.945	12.3405	-1.14529	90.0431	-0.0835663
10.5793	121.028	12.34	-1.14445	90.039	-0.0835048
10.5877	121.109	12.3394	-1.14359	90.0348	-0.0834424
10.596	121.194	12.3388	-1.14275	90.0306	-0.0833811
10.6043	121.282	12.3383	-1.14187	90.0264	-0.0833171
10.6127	121.364	12.3377	-1.14102	90.0223	-0.083255
10.621	121.446	12.3371	-1.14016	90.0183	-0.0831922
10.6293	121.531	12.3366	-1.13935	90.0141	-0.0831331
10.6377	121.617	12.336	-1.13856	90.0101	-0.0830755
10.646	121.696	12.3355	-1.13774	90.0062	-0.0830154
10.6543	121.79	12.3349	-1.13693	90.0022	-0.0829565
10.6627	121.867	12.3344	-1.13608	89.9982	-0.0828943
10.671	121.953	12.3338	-1.13526	89.994	-0.0828346
10.6793	122.038	12.3332	-1.13447	89.9898	-0.0827771
10.6877	122.117	12.3327	-1.13367	89.9857	-0.0827188
10.696	122.208	12.3321	-1.13288	89.9816	-0.0826607
10.7043	122.292	12.3315	-1.13208	89.9773	-0.0826027
10.7127	122.375	12.331	-1.13128	89.9733	-0.0825439
10.721	122.458	12.3304	-1.13048	89.9693	-0.0824858
10.7293	122.546	12.3299	-1.12971	89.9651	-0.0824294
10.7377	122.628	12.3293	-1.12894	89.961	-0.0823736
10.746	122.713	12.3287	-1.12818	89.9568	-0.0823181
10.7543	122.797	12.3282	-1.12739	89.9528	-0.0822606
10.7627	122.881	12.3276	-1.12659	89.9487	-0.0822017
10.771	122.965	12.327	-1.12583	89.9447	-0.0821461
10.7793	123.049	12.3265	-1.12506	89.9407	-0.0820906
10.7877	123.136	12.326	-1.12432	89.9367	-0.0820361
10.796	123.216	12.3254	-1.12359	89.9325	-0.0819827
10.8043	123.299	12.3248	-1.12286	89.9283	-0.0819298
10.8127	123.383	12.3242	-1.12211	89.9242	-0.0818754
10.821	123.468	12.3237	-1.12137	89.92	-0.0818209
10.8293	123.549	12.3231	-1.12066	89.9161	-0.0817694
10.8377	123.639	12.3226	-1.11995	89.9121	-0.0817176
10.846	123.716	12.3221	-1.11924	89.9082	-0.0816659
10.8543	123.804	12.3215	-1.11851	89.9042	-0.0816126
10.8627	123.889	12.3209	-1.1178	89.9001	-0.0815606
10.871	123.967	12.3204	-1.11709	89.896	-0.0815085
10.8793	124.059	12.3198	-1.11636	89.892	-0.0814557
10.8877	124.143	12.3193	-1.11561	89.888	-0.0814009
10.896	124.224	12.3187	-1.11492	89.8839	-0.0813501
10.9043	124.309	12.3182	-1.11421	89.8799	-0.0812985
10.9127	124.391	12.3176	-1.11346	89.8757	-0.0812438
10.921	124.478	12.3171	-1.11275	89.8718	-0.0811918
10.9293	124.563	12.3165	-1.11205	89.8678	-0.081141
10.9377	124.644	12.316	-1.11134	89.8638	-0.0810894
10.946	124.727	12.3154	-1.11066	89.8597	-0.0810393
10.9543	124.813	12.3149	-1.10995	89.8558	-0.0809877
10.9627	124.898	12.3143	-1.10926	89.8519	-0.0809373
10.971	124.976	12.3138	-1.10859	89.848	-0.0808883
10.9793	125.068	12.3133	-1.10787	89.844	-0.0808359
10.9877	125.15	12.3127	-1.10717	89.8401	-0.080785
10.996	125.231	12.3122	-1.1065	89.836	-0.0807361
11.0043	125.319	12.3116	-1.10584	89.832	-0.0806878
11.0127	125.399	12.3111	-1.10516	89.8281	-0.0806384
11.021	125.485	12.3105	-1.1045	89.8241	-0.0805899
11.0293	125.569	12.31	-1.10383	89.8202	-0.0805411
11.0377	125.65	12.3094	-1.10318	89.8162	-0.0804935
11.046	125.735	12.3089	-1.10253	89.8122	-0.0804466
11.0543	125.822	12.3084	-1.10186	89.8083	-0.0803977
11.0627	125.903	12.3078	-1.10123	89.8043	-0.0803519
11.071	125.99	12.3073	-1.10061	89.8003	-0.080306
11.0793	126.074	12.3067	-1.09997	89.7963	-0.0802599
11.0877	126.157	12.3062	-1.09932	89.7923	-0.0802123
11.096	126.244	12.3056	-1.09871	89.788	-0.0801677
11.1043	126.327	12.305	-1.09807	89.7838	-0.0801213
11.1127	126.407	12.3044	-1.09743	89.7797	-0.0800739
11.121	126.496	12.3039	-1.09678	89.7755	-0.0800267
11.1293	126.576	12.3033	-1.09616	89.7715	-0.0799815
11.1377	126.659	12.3028	-1.09555	89.7675	-0.0799373
11.146	126.74	12.3022	-1.09491	89.7635	-0.0798907
11.1543	126.826	12.3017	-1.09427	89.7594	-0.0798439
11.1627	126.908	12.3011	-1.09365	89.7552	-0.0797983
11.171	126.995	12.3005	-1.09305	89.7511	-0.0797546
11.1793	127.079	12.3	-1.09241	89.7474	-0.0797078
11.1877	127.162	12.2995	-1.09178	89.7437	-0.0796618
11.196	127.245	12.299	-1.09115	89.7398	-0.0796163
11.2043	127.327	12.2985	-1.09054	89.7362	-0.0795712
11.2127	127.411	12.2979	-1.08992	89.7321	-0.0795266
11.221	127.498	12.2974	-1.08932	89.7281	-0.0794827
11.2293	127.581	12.2968	-1.08873	89.7241	-0.0794392
11.2377	127.667	12.2963	-1.08811	89.7202	-0.0793946
11.246	127.75	12.2958	-1.08749	89.7164	-0.0793489
11.2543	127.832	12.2953	-1.08684	89.7127	-0.0793014
11.2627	127.918	12.2947	-1.08617	89.7087	-0.0792531
11.271	128.004	12.2941	-1.08556	89.7045	-0.079208
11.2793	128.085	12.2936	-1.08494	89.7005	-0.0791632
11.2877	128.167	12.293	-1.08437	89.6964	-0.0791213
11.296	128.252	12.2925	-1.08373	89.6924	-0.0790744
11.3043	128.337	12.292	-1.08307	89.6886	-0.0790264
11.3127	128.42	12.2915	-1.08246	89.685	-0.0789823
11.321	128.506	12.2909	-1.08186	89.681	-0.0789385
11.3293	128.589	12.2904	-1.08127	89.6772	-0.078895
11.3377	128.678	12.2899	-1.08068	89.6734	-0.0788519
11.346	128.761	12.2894	-1.08013	89.6696	-0.0788122
11.3543	128.842	12.2888	-1.07956	89.6657	-0.0787701
11.3627	128.928	12.2883	-1.07899	89.6619	-0.0787285
11.371	129.009	12.2878	-1.07838	89.6583	-0.0786844
11.3793	129.09	12.2873	-1.07779	89.6547	-0.0786415
11.3877	129.178	12.2867	-1.07724	89.6505	-0.0786008
11.396	129.259	12.2862	-1.07665	89.6464	-0.0785583
11.4043	129.34	12.2857	-1.07609	89.6427	-0.0785174
11.4127	129.425	12.2851	-1.07553	89.6386	-0.0784766
11.421	129.507	12.2845	-1.07499	89.6345	-0.0784368
11.4293	129.59	12.284	-1.07443	89.6305	-0.0783961
11.4377	129.675	12.2835	-1.07387	89.6266	-0.0783554
11.446	129.763	12.2829	-1.0733	89.6228	-0.0783135
11.4543	129.846	12.2824	-1.07274	89.6189	-0.0782728
11.4627	129.928	12.2819	-1.07221	89.6149	-0.0782337
11.471	130.014	12.2814	-1.07166	89.6114	-0.0781943
11.4793	130.097	12.2808	-1.07112	89.6076	-0.0781546
11.4877	130.177	12.2803	-1.07051	89.6035	-0.07811
11.496	130.265	12.2798	-1.06993	89.5999	-0.0780674
11.5043	130.347	12.2793	-1.06939	89.5962	-0.0780285
11.5127	130.432	12.2788	-1.06884	89.5923	-0.0779879
11.521	130.516	12.2782	-1.06828	89.5885	-0.077947
11.5293	130.601	12.2777	-1.06771	89.5847	-0.0779055
11.5377	130.681	12.2772	-1.06712	89.5809	-0.0778626
11.546	130.764	12.2766	-1.06652	89.5768	-0.0778189
11.5543	130.851	12.2761	-1.06591	89.5728	-0.077774
11.5627	130.932	12.2756	-1.06529	89.5689	-0.0777293
11.571	131.017	12.2751	-1.06475	89.5654	-0.0776894
11.5793	131.103	12.2746	-1.06419	89.5617	-0.0776486
11.5877	131.189	12.2741	-1.06356	89.558	-0.0776029
11.596	131.272	12.2736	-1.06295	89.5544	-0.0775586
11.6043	131.355	12.2731	-1.06236	89.5507	-0.0775153
11.6127	131.444	12.2725	-1.06175	89.5468	-0.0774711
11.621	131.525	12.272	-1.06117	89.543	-0.0774287
11.6293	131.611	12.2715	-1.06061	89.5393	-0.0773873
11.6377	131.695	12.271	-1.06005	89.5356	-0.0773465
11.646	131.779	12.2705	-1.05948	89.5318	-0.0773055
11.6543	131.858	12.2699	-1.05893	89.5279	-0.0772653
11.6627	131.943	12.2694	-1.05837	89.524	-0.0772241
11.671	132.026	12.2689	-1.05778	89.5201	-0.0771816
11.6793	132.117	12.2683	-1.0572	89.5162	-0.077139
11.6877	132.195	12.2678	-1.05664	89.512	-0.0770978
11.696	132.282	12.2672	-1.05609	89.5082	-0.077058
11.7043	132.365	12.2667	-1.05551	89.5044	-0.0770157
11.7127	132.449	12.2662	-1.05495	89.5007	-0.0769744
11.721	132.534	12.2657	-1.05438	89.4969	-0.0769334
11.7293	132.62	12.2652	-1.0538	89.4933	-0.0768904
11.7377	132.699	12.2647	-1.05317	89.4894	-0.0768451
11.746	132.782	12.2641	-1.05259	89.4856	-0.0768023
11.7543	132.867	12.2636	-1.05203	89.4817	-0.0767617
11.7627	132.951	12.2631	-1.05146	89.478	-0.0767203
11.771	133.033	12.2626	-1.05085	89.4745	-0.0766758
11.7793	133.12	12.2621	-1.05024	89.4707	-0.0766308
11.7877	133.202	12.2616	-1.04965	89.4672	-0.0765882
11.796	133.284	12.2611	-1.04903	89.4636	-0.076543
11.8043	133.368	12.2606	-1.04841	89.4599	-0.0764977
11.8127	133.454	12.2601	-1.04782	89.4562	-0.0764544
11.821	133.537	12.2596	-1.04723	89.4528	-0.0764118
11.8293	133.622	12.2592	-1.04659	89.4494	-0.0763649
11.8377	133.706	12.2587	-1.04596	89.4462	-0.0763189
11.846	133.787	12.2583	-1.04535	89.4427	-0.0762742
11.8543	133.872	12.2578	-1.04472	89.4391	-0.0762282
11.8627	133.958	12.2573	-1.04412	89.4356	-0.0761846
11.871	134.046	12.2568	-1.04351	89.4319	-0.0761398
11.8793	134.132	12.2563	-1.04288	89.4282	-0.0760939
11.8877	134.214	12.2558	-1.04224	89.4245	-0.0760476
11.896	134.294	12.2552	-1.0416	89.4207	-0.0760005
11.9043	134.38	12.2547	-1.04097	89.4169	-0.0759544
11.9127	134.463	12.2542	-1.04034	89.4133	-0.0759086
11.921	134.549	12.2537	-1.0397	89.4097	-0.0758617
11.9293	134.631	12.2532	-1.03904	89.406	-0.0758136
11.9377	134.711	12.2527	-1.03841	89.4025	-0.0757676
11.946	134.797	12.2523	-1.03777	89.3989	-0.0757213
11.9543	134.878	12.2518	-1.0371	89.3954	-0.0756725
11.9627	134.965	12.2513	-1.03647	89.3921	-0.0756266
11.971	135.049	12.2509	-1.03582	89.3887	-0.0755788
11.9793	135.132	12.2504	-1.03518	89.3856	-0.0755319
11.9877	135.221	12.25	-1.03452	89.3822	-0.0754837
11.996	135.304	12.2495	-1.03385	89.3786	-0.0754355
12.0043	135.381	12.249	-1.03317	89.3752	-0.0753855
12.0127	135.468	12.2485	-1.03249	89.3718	-0.0753358
12.021	135.554	12.2481	-1.03186	89.3683	-0.0752897
12.0293	135.642	12.2476	-1.03117	89.3647	-0.0752393
12.0377	135.725	12.2471	-1.03051	89.3611	-0.0751911
12.046	135.804	12.2466	-1.02981	89.3576	-0.0751401
12.0543	135.891	12.2461	-1.02913	89.3541	-0.0750909
12.0627	135.973	12.2457	-1.02847	89.3508	-0.0750426
12.071	136.059	12.2452	-1.02779	89.3473	-0.0749933
12.0793	136.142	12.2447	-1.02713	89.3438	-0.0749447
12.0877	136.226	12.2442	-1.02645	89.3401	-0.0748951
12.096	136.308	12.2438	-1.02578	89.3369	-0.0748465
12.1043	136.393	12.2433	-1.02508	89.3334	-0.0747954
12.1127	136.478	12.2428	-1.0244	89.3302	-0.0747455
12.121	136.561	12.2424	-1.0237	89.3272	-0.0746946
12.1293	136.647	12.2419	-1.02303	89.3236	-0.0746459
12.1377	136.729	12.2415	-1.02235	89.3203	-0.0745963
12.146	136.819	12.241	-1.02166	89.3166	-0.0745457
12.1543	136.899	12.2405	-1.02095	89.3133	-0.0744936
12.1627	136.986	12.2401	-1.02024	89.3099	-0.0744423
12.171	137.067	12.2396	-1.01958	89.3064	-0.0743942
12.1793	137.152	12.2391	-1.01887	89.3029	-0.0743419
12.1877	137.233	12.2387	-1.01816	89.2997	-0.0742906
12.196	137.318	12.2382	-1.01746	89.2963	-0.0742392
12.2043	137.401	12.2377	-1.01677	89.2927	-0.0741887
12.2127	137.485	12.2373	-1.01605	89.2895	-0.0741366
12.221	137.568	12.2368	-1.01536	89.2861	-0.0740857
12.2293	137.657	12.2363	-1.01467	89.2826	-0.0740355
12.2377	137.739	12.2359	-1.014	89.2793	-0.0739867
12.246	137.821	12.2354	-1.01335	89.2761	-0.0739392
12.2543	137.91	12.235	-1.01265	89.2731	-0.0738881
12.2627	137.991	12.2346	-1.01197	89.2701	-0.0738388
12.271	138.075	12.2341	-1.01128	89.2668	-0.0737885
12.2793	138.153	12.2337	-1.0106	89.2638	-0.073739
12.2877	138.24	12.2333	-1.00991	89.2608	-0.0736882
12.296	138.326	12.2329	-1.00921	89.2575	-0.0736372
12.3043	138.411	12.2325	-1.00852	89.2544	-0.0735866
12.3127	138.491	12.232	-1.00779	89.2513	-0.0735336
12.321	138.58	12.2316	-1.00707	89.2482	-0.0734808
12.3293	138.665	12.2311	-1.00631	89.2449	-0.0734259
12.3377	138.748	12.2307	-1.00559	89.2415	-0.0733729
12.346	138.831	12.2302	-1.00487	89.2381	-0.0733203
12.3543	138.916	12.2297	-1.00415	89.2346	-0.073268
12.3627	138.999	12.2293	-1.00345	89.2311	-0.073217
12.371	139.082	12.2288	-1.00273	89.2278	-0.0731643
12.3793	139.168	12.2284	-1.00201	89.2245	-0.0731119
12.3877	139.253	12.2279	-1.00131	89.2214	-0.0730609
12.396	139.338	12.2275	-1.00063	89.2182	-0.073011
12.4043	139.421	12.2271	-0.99993	89.2151	-0.0729602
12.4127	139.506	12.2266	-0.999205	89.2118	-0.0729073
12.421	139.588	12.2262	-0.998511	89.2087	-0.0728566
12.4293	139.672	12.2258	-0.997807	89.2056	-0.0728053
12.4377	139.757	12.2254	-0.997063	89.2027	-0.072751
12.446	139.839	12.2249	-0.996313	89.1996	-0.0726962
12.4543	139.927	12.2245	-0.995602	89.1967	-0.0726444
12.4627	140.011	12.2241	-0.994882	89.1936	-0.0725919
12.471	140.096	12.2237	-0.994135	89.1906	-0.0725373
12.4793	140.175	12.2233	-0.993418	89.1873	-0.072485
12.4877	140.259	12.2228	-0.992712	89.1842	-0.0724335
12.496	140.345	12.2224	-0.991997	89.1814	-0.0723813
12.5043	140.433	12.222	-0.991254	89.1784	-0.0723271
12.5127	140.516	12.2216	-0.990562	89.1752	-0.0722766
12.521	140.602	12.2211	-0.989874	89.172	-0.0722265
12.5293	140.682	12.2207	-0.989213	89.1689	-0.0721782
12.5377	140.769	12.2203	-0.988536	89.166	-0.0721288
12.546	140.848	12.2199	-0.987865	89.1629	-0.0720798
12.5543	140.936	12.2195	-0.987169	89.16	-0.072029
12.5627	141.018	12.2191	-0.986458	89.1571	-0.0719772
12.571	141.103	12.2187	-0.985736	89.1541	-0.0719245
12.5793	141.187	12.2183	-0.985051	89.151	-0.0718745
12.5877	141.273	12.2179	-0.984382	89.1479	-0.0718257
12.596	141.358	12.2175	-0.983686	89.145	-0.0717749
12.6043	141.444	12.217	-0.982984	89.1419	-0.0717237
12.6127	141.524	12.2166	-0.982271	89.1387	-0.0716716
12.621	141.61	12.2161	-0.981572	89.1354	-0.0716206
12.6293	141.693	12.2157	-0.98084	89.1326	-0.0715673
12.6377	141.778	12.2153	-0.980179	89.1295	-0.0715191
12.646	141.861	12.2149	-0.979469	89.1265	-0.0714672
12.6543	141.947	12.2145	-0.978757	89.1234	-0.0714153
12.6627	142.035	12.2141	-0.978062	89.1203	-0.0713645
12.671	142.112	12.2137	-0.977361	89.1173	-0.0713134
12.6793	142.2	12.2133	-0.976646	89.1143	-0.0712612
12.6877	142.284	12.2129	-0.975956	89.1115	-0.0712109
12.696	142.369	12.2125	-0.975247	89.1086	-0.0711592
12.7043	142.453	12.2121	-0.974513	89.1056	-0.0711056
12.7127	142.539	12.2116	-0.973838	89.1024	-0.0710564
12.721	142.626	12.2112	-0.973105	89.0994	-0.0710029
12.7293	142.706	12.2108	-0.972386	89.0963	-0.0709504
12.7377	142.787	12.2104	-0.971694	89.0934	-0.0708999
12.746	142.874	12.21	-0.971014	89.0903	-0.0708503
12.7543	142.959	12.2096	-0.970306	89.0875	-0.0707986
12.7627	143.037	12.2092	-0.969595	89.0847	-0.0707468
12.771	143.127	12.2088	-0.968891	89.0817	-0.0706954
12.7793	143.209	12.2084	-0.968205	89.0786	-0.0706453
12.7877	143.291	12.208	-0.967535	89.0756	-0.0705965
12.796	143.377	12.2075	-0.96683	89.0727	-0.070545
12.8043	143.459	12.2071	-0.96614	89.0697	-0.0704947
12.8127	143.542	12.2067	-0.965476	89.0669	-0.0704462
12.821	143.625	12.2064	-0.964783	89.064	-0.0703957
12.8293	143.712	12.206	-0.96408	89.0612	-0.0703444
12.8377	143.797	12.2056	-0.963394	89.0581	-0.0702943
12.846	143.884	12.2051	-0.962738	89.0552	-0.0702464
12.8543	143.968	12.2048	-0.96203	89.0523	-0.0701948
12.8627	144.048	12.2044	-0.961328	89.0494	-0.0701435
12.871	144.133	12.204	-0.960639	89.0465	-0.0700933
12.8793	144.217	12.2036	-0.95997	89.0437	-0.0700444
12.8877	144.305	12.2032	-0.9593	89.0409	-0.0699956
12.896	144.389	12.2028	-0.958613	89.0381	-0.0699455
12.9043	144.469	12.2024	-0.957961	89.0352	-0.0698979
12.9127	144.554	12.202	-0.957292	89.0324	-0.0698491
12.921	144.638	12.2016	-0.956637	89.0296	-0.0698013
12.9293	144.726	12.2012	-0.955955	89.0267	-0.0697515
12.9377	144.808	12.2008	-0.955319	89.0238	-0.0697051
12.946	144.89	12.2004	-0.954639	89.0208	-0.0696555
12.9543	144.976	12.2	-0.953925	89.0179	-0.0696034
12.9627	145.058	12.1997	-0.953217	89.0153	-0.0695518
12.971	145.144	12.1993	-0.952564	89.0125	-0.0695041
12.9793	145.228	12.1989	-0.951904	89.0096	-0.069456
12.9877	145.312	12.1985	-0.95124	89.0068	-0.0694075
12.996	145.395	12.1982	-0.950535	89.0042	-0.0693561
13.0043	145.48	12.1978	-0.949865	89.0014	-0.0693072
13.0127	145.565	12.1974	-0.949216	88.9987	-0.0692598
13.021	145.649	12.197	-0.948545	88.9959	-0.0692109
13.0293	145.731	12.1966	-0.947891	88.9932	-0.0691632
13.0377	145.818	12.1963	-0.947279	88.9903	-0.0691185
13.046	145.901	12.1959	-0.946646	88.9876	-0.0690723
13.0543	145.986	12.1955	-0.945965	88.9849	-0.0690226
13.0627	146.07	12.1951	-0.945288	88.9822	-0.0689732
13.071	146.155	12.1948	-0.944598	88.9795	-0.0689229
13.0793	146.238	12.1944	-0.943961	88.9768	-0.0688763
13.0877	146.315	12.194	-0.943282	88.974	-0.0688269
13.096	146.404	12.1936	-0.942608	88.9712	-0.0687776
13.1043	146.487	12.1933	-0.941932	88.9684	-0.0687284
13.1127	146.572	12.1929	-0.941308	88.9658	-0.0686828
13.121	146.659	12.1925	-0.940665	88.9631	-0.0686359
13.1293	146.739	12.1921	-0.940032	88.9602	-0.0685897
13.1377	146.827	12.1917	-0.939375	88.9574	-0.0685418
13.146	146.906	12.1914	-0.93874	88.9547	-0.0684954
13.1543	146.992	12.191	-0.938089	88.9523	-0.0684479
13.1627	147.075	12.1907	-0.937441	88.9495	-0.0684006
13.171	147.156	12.1903	-0.936803	88.9467	-0.0683541
13.1793	147.24	12.1899	-0.936149	88.944	-0.0683064
13.1877	147.326	12.1896	-0.935524	88.9415	-0.0682608
13.196	147.413	12.1892	-0.934855	88.939	-0.0682119
13.2043	147.496	12.1889	-0.934183	88.9364	-0.0681629
13.2127	147.579	12.1885	-0.933549	88.9336	-0.0681167
13.221	147.658	12.1881	-0.932931	88.9306	-0.0680716
13.2293	147.749	12.1877	-0.932286	88.9277	-0.0680245
13.2377	147.83	12.1873	-0.93168	88.9248	-0.0679803
13.246	147.917	12.1869	-0.931058	88.9219	-0.0679349
13.2543	147.998	12.1865	-0.930433	88.9192	-0.0678893
13.2627	148.081	12.1861	-0.929824	88.9163	-0.0678448
13.271	148.166	12.1857	-0.929217	88.9133	-0.0678006
13.2793	148.253	12.1853	-0.928601	88.9104	-0.0677557
13.2877	148.335	12.1849	-0.927997	88.9075	-0.0677115
13.296	148.426	12.1846	-0.927378	88.9051	-0.0676664
13.3043	148.503	12.1842	-0.926773	88.9026	-0.0676223
13.3127	148.59	12.1839	-0.926162	88.9001	-0.0675777
13.321	148.67	12.1835	-0.925549	88.8973	-0.067533
13.3293	148.76	12.1832	-0.924924	88.8948	-0.0674873
13.3377	148.841	12.1828	-0.924297	88.8923	-0.0674416
13.346	148.921	12.1825	-0.92368	88.89	-0.0673966
13.3543	149.005	12.1822	-0.923026	88.8878	-0.0673488
13.3627	149.083	12.1819	-0.922391	88.8853	-0.0673025
13.371	149.169	12.1815	-0.921766	88.8828	-0.0672569
13.3793	149.253	12.1812	-0.921141	88.8802	-0.0672113
13.3877	149.34	12.1808	-0.920484	88.8777	-0.0671634
13.396	149.424	12.1805	-0.919855	88.8751	-0.0671175
13.4043	149.507	12.1801	-0.919231	88.8724	-0.067072
13.4127	149.59	12.1798	-0.918634	88.8699	-0.0670284
13.421	149.675	12.1794	-0.918045	88.8673	-0.0669854
13.4293	149.755	12.179	-0.917414	88.8645	-0.0669394
13.4377	149.843	12.1786	-0.916807	88.8618	-0.066895
13.446	149.928	12.1783	-0.916198	88.8593	-0.0668506
13.4543	150.013	12.178	-0.915565	88.8568	-0.0668044
13.4627	150.092	12.1776	-0.914938	88.8543	-0.0667587
13.471	150.178	12.1773	-0.914339	88.8517	-0.066715
13.4793	150.262	12.1769	-0.913726	88.849	-0.0666703
13.4877	150.347	12.1765	-0.913108	88.8463	-0.0666251
13.496	150.431	12.1762	-0.912468	88.8437	-0.0665785
13.5043	150.514	12.1758	-0.911842	88.8409	-0.0665328
13.5127	150.592	12.1754	-0.911258	88.8384	-0.0664902
13.521	150.68	12.1751	-0.91067	88.8359	-0.0664473
13.5293	150.764	12.1747	-0.910057	88.8334	-0.0664026
13.5377	150.85	12.1744	-0.90948	88.8308	-0.0663604
13.546	150.933	12.174	-0.908879	88.8281	-0.0663166
13.5543	151.014	12.1737	-0.908278	88.8255	-0.0662728
13.5627	151.097	12.1733	-0.907693	88.8231	-0.0662301
13.571	151.181	12.173	-0.907087	88.8208	-0.0661859
13.5793	151.27	12.1727	-0.906477	88.8181	-0.0661413
13.5877	151.352	12.1723	-0.90587	88.8156	-0.066097
13.596	151.435	12.172	-0.905241	88.813	-0.0660511
13.6043	151.518	12.1716	-0.904624	88.8106	-0.0660061
13.6127	151.6	12.1713	-0.904025	88.808	-0.0659624
13.621	151.685	12.1709	-0.90344	88.8054	-0.0659197
13.6293	151.769	12.1706	-0.90283	88.8028	-0.0658752
13.6377	151.854	12.1702	-0.90223	88.8003	-0.0658315
13.646	151.935	12.1699	-0.901643	88.7978	-0.0657886
13.6543	152.026	12.1695	-0.901084	88.7954	-0.0657479
13.6627	152.108	12.1692	-0.900518	88.793	-0.0657065
13.671	152.192	12.1689	-0.899937	88.7906	-0.0656641
13.6793	152.274	12.1685	-0.899355	88.7882	-0.0656217
13.6877	152.36	12.1682	-0.898788	88.7856	-0.0655803
13.696	152.445	12.1678	-0.898209	88.783	-0.065538
13.7043	152.528	12.1675	-0.897612	88.7806	-0.0654945
13.7127	152.612	12.1672	-0.897044	88.778	-0.065453
13.721	152.697	12.1668	-0.896479	88.7755	-0.0654119
13.7293	152.78	12.1665	-0.895886	88.773	-0.0653686
13.7377	152.864	12.1662	-0.895263	88.7706	-0.0653231
13.746	152.946	12.1658	-0.894672	88.7682	-0.06528
13.7543	153.035	12.1655	-0.894088	88.7659	-0.0652374
13.7627	153.121	12.1652	-0.89352	88.7636	-0.0651959
13.771	153.204	12.1648	-0.892949	88.7611	-0.0651543
13.7793	153.284	12.1645	-0.892407	88.7588	-0.0651147
13.7877	153.368	12.1642	-0.89182	88.7566	-0.0650719
13.796	153.452	12.1639	-0.891235	88.7544	-0.0650292
13.8043	153.542	12.1636	-0.890648	88.752	-0.0649864
13.8127	153.62	12.1633	-0.890117	88.7498	-0.0649476
13.821	153.705	12.163	-0.889571	88.7473	-0.0649078
13.8293	153.791	12.1626	-0.888996	88.7447	-0.0648658
13.8377	153.872	12.1623	-0.888408	88.7423	-0.0648229
13.846	153.954	12.1619	-0.887834	88.7396	-0.0647811
13.8543	154.045	12.1615	-0.887247	88.737	-0.0647382
13.8627	154.128	12.1612	-0.886648	88.7346	-0.0646945
13.871	154.21	12.1609	-0.886099	88.732	-0.0646545
13.8793	154.294	12.1605	-0.885557	88.7296	-0.0646149
13.8877	154.378	12.1602	-0.885	88.7273	-0.0645743
13.896	154.462	12.1599	-0.884398	88.7249	-0.0645304
13.9043	154.547	12.1595	-0.883807	88.7225	-0.0644872
13.9127	154.628	12.1592	-0.883281	88.7202	-0.0644488
13.921	154.717	12.1589	-0.882757	88.7179	-0.0644106
13.9293	154.799	12.1586	-0.882194	88.7156	-0.0643695
13.9377	154.885	12.1583	-0.881658	88.7134	-0.0643304
13.946	154.963	12.158	-0.881116	88.7109	-0.0642909
13.9543	155.05	12.1576	-0.880561	88.7083	-0.0642504
13.9627	155.132	12.1572	-0.88	88.7057	-0.0642094
13.971	155.214	12.1569	-0.879442	88.7032	-0.0641687
13.9793	155.302	12.1566	-0.878857	88.7007	-0.064126
13.9877	155.387	12.1562	-0.878296	88.6983	-0.0640851
13.996	155.47	12.1559	-0.877727	88.6961	-0.0640436
14.0043	155.559	12.1556	-0.87716	88.6937	-0.0640022
14.0127	155.64	12.1553	-0.876611	88.6915	-0.0639621
14.021	155.726	12.155	-0.876061	88.6891	-0.0639221
14.0293	155.807	12.1547	-0.875497	88.6868	-0.0638809
14.0377	155.893	12.1544	-0.874949	88.6846	-0.0638409
14.046	155.976	12.1541	-0.874376	88.6826	-0.0637991
14.0543	156.06	12.1538	-0.873818	88.6802	-0.0637584
14.0627	156.143	12.1534	-0.873318	88.6776	-0.0637219
14.071	156.226	12.1531	-0.872825	88.6751	-0.0636859
14.0793	156.308	12.1527	-0.87229	88.6727	-0.0636469
14.0877	156.395	12.1524	-0.871737	88.6705	-0.0636065
14.096	156.474	12.1521	-0.871204	88.6681	-0.0635676
14.1043	156.561	12.1518	-0.870661	88.6658	-0.063528
14.1127	156.643	12.1515	-0.870131	88.6636	-0.0634893
14.121	156.728	12.1512	-0.869573	88.6615	-0.0634486
14.1293	156.811	12.1508	-0.869056	88.6589	-0.0634109
14.1377	156.898	12.1505	-0.868516	88.6565	-0.0633715
14.146	156.981	12.1502	-0.86795	88.6546	-0.0633302
14.1543	157.069	12.1499	-0.86737	88.6523	-0.0632879
14.1627	157.152	12.1496	-0.866815	88.6497	-0.0632474
14.171	157.236	12.1492	-0.866271	88.6473	-0.0632077
14.1793	157.321	12.1489	-0.865705	88.645	-0.0631664
14.1877	157.404	12.1486	-0.865141	88.6427	-0.0631253
14.196	157.486	12.1483	-0.864608	88.6405	-0.0630864
14.2043	157.572	12.148	-0.864077	88.6381	-0.0630476
14.2127	157.657	12.1477	-0.863514	88.6357	-0.0630066
14.221	157.737	12.1474	-0.862984	88.6338	-0.0629678
14.2293	157.818	12.1471	-0.862466	88.6316	-0.06293
14.2377	157.903	12.1468	-0.861962	88.6294	-0.0628933
14.246	157.987	12.1465	-0.861448	88.6274	-0.0628558
14.2543	158.073	12.1462	-0.860945	88.6252	-0.0628191
14.2627	158.153	12.1459	-0.860434	88.6229	-0.0627818
14.271	158.238	12.1456	-0.859918	88.6205	-0.0627442
14.2793	158.32	12.1452	-0.859389	88.6181	-0.0627056
14.2877	158.405	12.145	-0.858841	88.616	-0.0626656
14.296	158.489	12.1447	-0.858341	88.614	-0.0626291
14.3043	158.574	12.1444	-0.857822	88.6117	-0.0625912
14.3127	158.66	12.1441	-0.857316	88.6095	-0.0625543
14.321	158.742	12.1437	-0.856792	88.6071	-0.062516
14.3293	158.827	12.1434	-0.856262	88.6047	-0.0624774
14.3377	158.91	12.1431	-0.855734	88.6025	-0.0624389
14.346	158.994	12.1428	-0.855226	88.6003	-0.0624018
14.3543	159.081	12.1425	-0.854725	88.5982	-0.0623652
14.3627	159.164	12.1422	-0.854227	88.596	-0.0623289
14.371	159.247	12.1419	-0.853762	88.5936	-0.0622949
14.3793	159.331	12.1416	-0.853258	88.5912	-0.0622582
14.3877	159.414	12.1412	-0.85275	88.5888	-0.0622211
14.396	159.502	12.1409	-0.852234	88.5866	-0.0621835
14.4043	159.586	12.1406	-0.851726	88.5844	-0.0621464
14.4127	159.669	12.1403	-0.851247	88.5823	-0.0621115
14.421	159.749	12.1401	-0.850749	88.5803	-0.0620751
14.4293	159.833	12.1397	-0.850272	88.578	-0.0620403
14.4377	159.916	12.1394	-0.849767	88.5758	-0.0620035
14.446	160.005	12.1391	-0.849267	88.5736	-0.061967
14.4543	160.082	12.1388	-0.848773	88.5714	-0.061931
14.4627	160.17	12.1386	-0.848291	88.5696	-0.0618958
14.471	160.257	12.1383	-0.847818	88.5674	-0.0618613
14.4793	160.339	12.138	-0.847316	88.5652	-0.0618246
14.4877	160.424	12.1377	-0.846841	88.5631	-0.06179
14.496	160.507	12.1374	-0.846343	88.561	-0.0617537
14.5043	160.59	12.1371	-0.845882	88.5588	-0.06172
14.5127	160.673	12.1368	-0.845398	88.5566	-0.0616847
14.521	160.761	12.1365	-0.84494	88.5545	-0.0616513
14.5293	160.845	12.1363	-0.844446	88.5525	-0.0616152
14.5377	160.93	12.1359	-0.843953	88.5503	-0.0615793
14.546	161.015	12.1356	-0.843475	88.548	-0.0615444
14.5543	161.094	12.1354	-0.842998	88.5459	-0.0615095
14.5627	161.181	12.1351	-0.842548	88.5439	-0.0614768
14.571	161.265	12.1348	-0.842077	88.5418	-0.0614423
14.5793	161.35	12.1345	-0.841606	88.5396	-0.061408
14.5877	161.432	12.1342	-0.84111	88.5376	-0.0613718
14.596	161.517	12.1339	-0.840616	88.5355	-0.0613357
14.6043	161.602	12.1336	-0.840132	88.5334	-0.0613005
14.6127	161.687	12.1333	-0.839649	88.5312	-0.0612652
14.621	161.767	12.1331	-0.839167	88.5292	-0.0612301
14.6293	161.85	12.1328	-0.838682	88.527	-0.0611946
14.6377	161.935	12.1325	-0.838183	88.5248	-0.0611582
14.646	162.019	12.1322	-0.837674	88.5227	-0.0611211
14.6543	162.104	12.1319	-0.837187	88.5206	-0.0610856
14.6627	162.191	12.1316	-0.836715	88.5185	-0.0610511
14.671	162.271	12.1313	-0.836259	88.5167	-0.0610179
14.6793	162.359	12.131	-0.835795	88.5144	-0.060984
14.6877	162.437	12.1307	-0.835341	88.5121	-0.0609509
14.696	162.528	12.1305	-0.834891	88.5102	-0.0609181
14.7043	162.611	12.1302	-0.834435	88.508	-0.0608848
14.7127	162.691	12.1299	-0.834001	88.5061	-0.0608531
14.721	162.777	12.1296	-0.833557	88.5041	-0.0608207
14.7293	162.862	12.1293	-0.833125	88.5021	-0.0607892
14.7377	162.944	12.1291	-0.832697	88.5	-0.060758
14.746	163.027	12.1288	-0.832241	88.4978	-0.0607247
14.7543	163.112	12.1285	-0.831758	88.4956	-0.0606894
14.7627	163.199	12.1282	-0.831289	88.4936	-0.0606553
14.771	163.281	12.1279	-0.830838	88.4916	-0.0606223
14.7793	163.365	12.1276	-0.830373	88.4896	-0.0605884
14.7877	163.448	12.1273	-0.829902	88.4875	-0.060554
14.796	163.53	12.1271	-0.829413	88.4856	-0.0605183
14.8043	163.616	12.1268	-0.828963	88.4837	-0.0604855
14.8127	163.699	12.1265	-0.828489	88.4816	-0.060451
14.821	163.782	12.1262	-0.828008	88.4792	-0.0604158
14.8293	163.867	12.1259	-0.827564	88.4771	-0.0603835
14.8377	163.951	12.1256	-0.827123	88.4751	-0.0603512
14.846	164.035	12.1254	-0.826667	88.4732	-0.060318
14.8543	164.121	12.1251	-0.826186	88.4713	-0.0602829
14.8627	164.203	12.1248	-0.825747	88.4692	-0.0602508
14.871	164.286	12.1246	-0.825315	88.4672	-0.0602193
14.8793	164.37	12.1243	-0.824866	88.4651	-0.0601866
14.8877	164.453	12.124	-0.824415	88.463	-0.0601537
14.896	164.538	12.1237	-0.823987	88.4612	-0.0601224
14.9043	164.623	12.1235	-0.823558	88.4593	-0.0600911
14.9127	164.709	12.1232	-0.823112	88.4574	-0.0600586
14.921	164.792	12.123	-0.822708	88.4556	-0.0600291
14.9293	164.874	12.1227	-0.82229	88.4534	-0.0599986
14.9377	164.958	12.1224	-0.821857	88.4513	-0.059967
14.946	165.039	12.1221	-0.821435	88.4491	-0.0599362
14.9543	165.125	12.1218	-0.820977	88.4471	-0.0599028
14.9627	165.21	12.1215	-0.820529	88.4451	-0.0598701
14.971	165.295	12.1212	-0.820082	88.4429	-0.0598375
14.9793	165.379	12.1209	-0.819621	88.4406	-0.0598039
14.9877	165.462	12.1206	-0.819175	88.4386	-0.0597713
14.996	165.547	12.1203	-0.818742	88.4364	-0.0597397
15.0043	165.628	12.12	-0.818283	88.4341	-0.0597062
15.0127	165.707	12.1197	-0.81785	88.4319	-0.0596747
15.021	165.796	12.1194	-0.817396	88.4298	-0.0596415
15.0293	165.878	12.1192	-0.816956	88.4279	-0.0596094
15.0377	165.963	12.1189	-0.816569	88.426	-0.0595812
15.046	166.05	12.1187	-0.816167	88.4241	-0.0595518
15.0543	166.126	12.1184	-0.815741	88.4222	-0.0595207
15.0627	166.21	12.1182	-0.815337	88.4205	-0.0594913
15.071	166.296	12.1179	-0.814886	88.4187	-0.0594584
15.0793	166.382	12.1176	-0.81442	88.4167	-0.0594244
15.0877	166.465	12.1174	-0.813967	88.4147	-0.0593913
15.096	166.551	12.1171	-0.813514	88.4128	-0.0593583
15.1043	166.632	12.1168	-0.81306	88.4107	-0.0593251
15.1127	166.72	12.1166	-0.812612	88.4087	-0.0592924
15.121	166.802	12.1163	-0.812146	88.4066	-0.0592585
15.1293	166.886	12.116	-0.811723	88.4047	-0.0592276
15.1377	166.975	12.1157	-0.811312	88.4025	-0.0591976
15.146	167.053	12.1154	-0.810876	88.4004	-0.0591658
15.1543	167.135	12.1151	-0.810467	88.3984	-0.0591359
15.1627	167.222	12.1149	-0.810054	88.3964	-0.0591058
15.171	167.306	12.1146	-0.809664	88.3947	-0.0590773
15.1793	167.388	12.1144	-0.809248	88.3928	-0.059047
15.1877	167.47	12.1142	-0.808852	88.3912	-0.0590181
15.196	167.556	12.1139	-0.808424	88.3895	-0.0589869
15.2043	167.639	12.1136	-0.808009	88.3876	-0.0589566
15.2127	167.724	12.1134	-0.807575	88.3856	-0.0589249
15.221	167.806	12.1131	-0.807149	88.3838	-0.0588938
15.2293	167.888	12.1129	-0.806752	88.3819	-0.0588649
15.2377	167.973	12.1126	-0.806338	88.3799	-0.0588347
15.246	168.056	12.1123	-0.805944	88.3781	-0.0588059
15.2543	168.142	12.1121	-0.805543	88.376	-0.0587767
15.2627	168.224	12.1118	-0.805159	88.3742	-0.0587486
15.271	168.308	12.1115	-0.804759	88.3719	-0.0587194
15.2793	168.394	12.1112	-0.804367	88.3698	-0.0586908
15.2877	168.477	12.1109	-0.803983	88.3677	-0.0586629
15.296	168.56	12.1107	-0.803559	88.3658	-0.0586319
15.3043	168.644	12.1104	-0.803132	88.3639	-0.0586008
15.3127	168.73	12.1101	-0.802708	88.362	-0.0585698
15.321	168.817	12.1099	-0.802325	88.36	-0.0585418
15.3293	168.897	12.1096	-0.801906	88.3582	-0.0585113
15.3377	168.983	12.1094	-0.801482	88.3564	-0.0584804
15.346	169.065	12.1091	-0.801079	88.3544	-0.0584509
15.3543	169.148	12.1088	-0.800682	88.3525	-0.058422
15.3627	169.236	12.1086	-0.800306	88.3505	-0.0583946
15.371	169.318	12.1083	-0.799897	88.3488	-0.0583647
15.3793	169.402	12.1081	-0.799541	88.3469	-0.0583388
15.3877	169.484	12.1078	-0.799198	88.3447	-0.0583137
15.396	169.571	12.1075	-0.798824	88.3428	-0.0582864
15.4043	169.649	12.1072	-0.79842	88.3408	-0.0582569
15.4127	169.737	12.107	-0.798042	88.339	-0.0582294
15.421	169.82	12.1067	-0.797646	88.3371	-0.0582005
15.4293	169.902	12.1065	-0.79724	88.3353	-0.0581708
15.4377	169.987	12.1062	-0.79684	88.3334	-0.0581416
15.446	170.069	12.106	-0.796426	88.3315	-0.0581114
15.4543	170.155	12.1057	-0.796034	88.3296	-0.0580828
15.4627	170.236	12.1054	-0.795645	88.3276	-0.0580545
15.471	170.324	12.1052	-0.79523	88.326	-0.0580242
15.4793	170.407	12.105	-0.794813	88.3242	-0.0579938
15.4877	170.491	12.1047	-0.794441	88.3223	-0.0579666
15.496	170.574	12.1044	-0.794017	88.3202	-0.0579357
15.5043	170.655	12.1042	-0.793611	88.3183	-0.057906
15.5127	170.744	12.1039	-0.793217	88.3161	-0.0578773
15.521	170.828	12.1036	-0.792838	88.3142	-0.0578496
15.5293	170.915	12.1033	-0.792458	88.3122	-0.0578219
15.5377	170.998	12.103	-0.792058	88.3102	-0.0577927
15.546	171.082	12.1028	-0.791625	88.3083	-0.0577611
15.5543	171.166	12.1025	-0.791236	88.3064	-0.0577327
15.5627	171.244	12.1023	-0.790847	88.3045	-0.0577044
15.571	171.329	12.102	-0.790439	88.3027	-0.0576746
15.5793	171.413	12.1018	-0.790093	88.3008	-0.0576494
15.5877	171.5	12.1015	-0.789723	88.299	-0.0576224
15.596	171.582	12.1013	-0.789363	88.2974	-0.0575961
15.6043	171.664	12.1011	-0.788992	88.2957	-0.057569
15.6127	171.749	12.1008	-0.788628	88.2937	-0.0575425
15.621	171.834	12.1005	-0.788265	88.2918	-0.057516
15.6293	171.917	12.1003	-0.787916	88.2898	-0.0574905
15.6377	171.999	12.1	-0.787558	88.2878	-0.0574644
15.646	172.083	12.0997	-0.787208	88.2859	-0.0574389
15.6543	172.166	12.0994	-0.786834	88.2839	-0.0574115
15.6627	172.246	12.0992	-0.786459	88.2821	-0.0573842
15.671	172.332	12.0989	-0.786122	88.2801	-0.0573596
15.6793	172.421	12.0986	-0.785756	88.2781	-0.0573329
15.6877	172.497	12.0984	-0.785365	88.2762	-0.0573043
15.696	172.584	12.0981	-0.784983	88.2744	-0.0572765
15.7043	172.666	12.0979	-0.784624	88.2728	-0.0572503
15.7127	172.749	12.0977	-0.784249	88.2711	-0.057223
15.721	172.837	12.0975	-0.783848	88.2694	-0.0571937
15.7293	172.92	12.0972	-0.783475	88.2677	-0.0571665
15.7377	173.002	12.097	-0.783098	88.266	-0.057139
15.746	173.091	12.0967	-0.782748	88.2642	-0.0571134
15.7543	173.171	12.0965	-0.782352	88.2625	-0.0570845
15.7627	173.257	12.0963	-0.781959	88.2608	-0.0570559
15.771	173.343	12.096	-0.781605	88.2591	-0.0570301
15.7793	173.424	12.0958	-0.781244	88.2572	-0.0570037
15.7877	173.509	12.0956	-0.780876	88.2556	-0.0569768
15.796	173.587	12.0953	-0.780524	88.2538	-0.0569511
15.8043	173.675	12.0951	-0.780164	88.2521	-0.0569249
15.8127	173.759	12.0948	-0.779802	88.2502	-0.0568984
15.821	173.839	12.0945	-0.779463	88.2482	-0.0568738
15.8293	173.927	12.0943	-0.779069	88.2462	-0.056845
15.8377	174.012	12.094	-0.778696	88.2445	-0.0568178
15.846	174.091	12.0938	-0.778318	88.2427	-0.0567902
15.8543	174.177	12.0935	-0.777961	88.2408	-0.0567642
15.8627	174.261	12.0933	-0.777609	88.2391	-0.0567384
15.871	174.345	12.0931	-0.777224	88.2373	-0.0567104
15.8793	174.431	12.0928	-0.776833	88.2356	-0.0566818
15.8877	174.513	12.0926	-0.776467	88.2338	-0.0566551
15.896	174.592	12.0923	-0.776076	88.2322	-0.0566266
15.9043	174.679	12.0921	-0.775673	88.2306	-0.0565972
15.9127	174.763	12.0919	-0.775313	88.2287	-0.0565709
15.921	174.847	12.0916	-0.774977	88.2269	-0.0565464
15.9293	174.934	12.0914	-0.774653	88.2252	-0.0565228
15.9377	175.015	12.0912	-0.774273	88.2236	-0.0564951
15.946	175.103	12.0909	-0.773905	88.2217	-0.0564682
15.9543	175.181	12.0907	-0.773561	88.2198	-0.0564431
15.9627	175.265	12.0904	-0.773232	88.2179	-0.0564191
15.971	175.352	12.0902	-0.772886	88.2162	-0.0563938
15.9793	175.435	12.0899	-0.772552	88.2146	-0.0563695
15.9877	175.521	12.0897	-0.772203	88.2128	-0.056344
15.996	175.599	12.0894	-0.771849	88.2109	-0.0563182
16.0043	175.691	12.0892	-0.771487	88.2092	-0.0562917
16.0127	175.768	12.0889	-0.771155	88.2072	-0.0562675
16.021	175.854	12.0887	-0.770838	88.2054	-0.0562444
16.0293	175.935	12.0885	-0.77049	88.2038	-0.056219
16.0377	176.021	12.0882	-0.770122	88.2021	-0.0561921
16.046	176.104	12.088	-0.769779	88.2003	-0.0561672
16.0543	176.184	12.0877	-0.769454	88.1985	-0.0561434
16.0627	176.272	12.0875	-0.769135	88.1965	-0.0561202
16.071	176.355	12.0872	-0.768821	88.1947	-0.0560973
16.0793	176.439	12.087	-0.768487	88.1931	-0.0560729
16.0877	176.522	12.0868	-0.768153	88.1913	-0.0560485
16.096	176.608	12.0865	-0.767773	88.1896	-0.0560208
16.1043	176.692	12.0863	-0.767404	88.1879	-0.0559938
16.1127	176.775	12.0861	-0.767052	88.1862	-0.0559682
16.121	176.858	12.0858	-0.766733	88.1844	-0.0559449
16.1293	176.941	12.0856	-0.766393	88.1827	-0.0559201
16.1377	177.027	12.0853	-0.766029	88.1809	-0.0558935
16.146	177.108	12.0851	-0.765663	88.179	-0.0558668
16.1543	177.193	12.0848	-0.765269	88.1772	-0.0558381
16.1627	177.28	12.0846	-0.764906	88.1754	-0.0558116
16.171	177.358	12.0843	-0.764558	88.1737	-0.0557861
16.1793	177.442	12.0841	-0.764242	88.172	-0.0557631
16.1877	177.529	12.0838	-0.763926	88.1701	-0.0557401
16.196	177.608	12.0836	-0.763588	88.1682	-0.0557154
16.2043	177.69	12.0833	-0.763228	88.1663	-0.0556892
16.2127	177.775	12.0831	-0.762883	88.1645	-0.055664
16.221	177.86	12.0828	-0.762555	88.1627	-0.05564
16.2293	177.943	12.0826	-0.762217	88.161	-0.0556154
16.2377	178.027	12.0824	-0.76192	88.1593	-0.0555937
16.246	178.105	12.0822	-0.761566	88.158	-0.0555679
16.2543	178.192	12.082	-0.761212	88.1563	-0.0555421
16.2627	178.279	12.0817	-0.760874	88.1547	-0.0555174
16.271	178.362	12.0815	-0.76052	88.1531	-0.0554915
16.2793	178.445	12.0813	-0.760203	88.1516	-0.0554684
16.2877	178.527	12.0811	-0.7599	88.15	-0.0554463
16.296	178.614	12.0808	-0.759569	88.1482	-0.0554221
16.3043	178.696	12.0806	-0.759229	88.1465	-0.0553974
16.3127	178.78	12.0804	-0.7589	88.1448	-0.0553733
16.321	178.867	12.0801	-0.75856	88.1431	-0.0553486
16.3293	178.946	12.0799	-0.758247	88.1412	-0.0553257
16.3377	179.031	12.0797	-0.757931	88.1395	-0.0553027
16.346	179.115	12.0794	-0.757605	88.138	-0.0552789
16.3543	179.198	12.0792	-0.757286	88.1364	-0.0552556
16.3627	179.281	12.079	-0.756933	88.1345	-0.0552298
16.371	179.369	12.0787	-0.756581	88.1329	-0.0552041
16.3793	179.448	12.0785	-0.756207	88.1314	-0.0551768
16.3877	179.534	12.0783	-0.755859	88.1298	-0.0551515
16.396	179.615	12.0781	-0.755538	88.1281	-0.055128
16.4043	179.7	12.0779	-0.755243	88.1265	-0.0551065
16.4127	179.781	12.0777	-0.754945	88.1249	-0.0550847
16.421	179.866	12.0774	-0.754629	88.1232	-0.0550617
16.4293	179.95	12.0772	-0.754311	88.1213	-0.0550385
16.4377	180.032	12.0769	-0.754016	88.1196	-0.055017
16.446	180.116	12.0767	-0.753724	88.1183	-0.0549957
16.4543	180.199	12.0765	-0.753415	88.1168	-0.0549731
16.4627	180.283	12.0763	-0.753127	88.1153	-0.0549522
16.471	180.37	12.0761	-0.752826	88.1136	-0.0549301
16.4793	180.452	12.0759	-0.752502	88.1118	-0.0549065
16.4877	180.537	12.0756	-0.75219	88.1102	-0.0548837
16.496	180.619	12.0754	-0.751877	88.1083	-0.0548609
16.5043	180.701	12.0751	-0.751558	88.1064	-0.0548376
16.5127	180.786	12.0749	-0.751222	88.1046	-0.0548131
16.521	180.865	12.0746	-0.750881	88.1028	-0.0547883
16.5293	180.951	12.0744	-0.750564	88.1008	-0.0547651
16.5377	181.039	12.0741	-0.750271	88.099	-0.0547437
16.546	181.125	12.0738	-0.749984	88.097	-0.0547228
16.5543	181.206	12.0736	-0.749704	88.0952	-0.0547024
16.5627	181.29	12.0733	-0.74941	88.0935	-0.0546809
16.571	181.372	12.0731	-0.749107	88.0918	-0.0546588
16.5793	181.454	12.0729	-0.748809	88.0901	-0.054637
16.5877	181.54	12.0726	-0.748515	88.0884	-0.0546156
16.596	181.623	12.0724	-0.748192	88.0868	-0.054592
16.6043	181.706	12.0722	-0.747893	88.0851	-0.0545702
16.6127	181.79	12.0719	-0.747585	88.0833	-0.0545478
16.621	181.875	12.0717	-0.747274	88.0816	-0.0545251
16.6293	181.957	12.0715	-0.746957	88.0802	-0.0545019
16.6377	182.042	12.0713	-0.746656	88.0787	-0.05448
16.646	182.124	12.0711	-0.746367	88.0773	-0.0544589
[truncated: 9,859 more rows]
