# Supplementary material for: Comparative study on mechanisms for improving mechanical properties and microstructure of cement paste modified by different types of nanomaterials
Source: publisher site journal article supplement (doi:10.1515/ntrev-2021-0027), 2021-01-01
Supplement: Supplementary file 10 [file NG-0.03-1d.xlsx]

## Sheet: Sheet1
Time (min)	Temperature (°C)	Weight (mg)			Temperature Difference (°C/mg)
0.00206667	18.5235	13.4433	-0.504906	100	-0.0375581
0.00433333	18.5285	13.443	-0.507133	99.9979	-0.0377238
0.0126667	18.5296	13.4427	-0.507494	99.9951	-0.0377506
0.021	18.5265	13.4422	-0.508058	99.992	-0.0377926
0.0293333	18.5324	13.4419	-0.50881	99.9893	-0.0378485
0.0376667	18.5282	13.4415	-0.509768	99.9865	-0.0379198
0.046	18.5304	13.4411	-0.510914	99.9836	-0.0380051
0.0543333	18.5285	13.4407	-0.512266	99.9804	-0.0381056
0.0626667	18.5267	13.4402	-0.513831	99.9768	-0.038222
0.071	18.5245	13.4397	-0.51557	99.9734	-0.0383514
0.0793333	18.5206	13.4393	-0.51753	99.9701	-0.0384972
0.0876667	18.5181	13.4389	-0.519551	99.9669	-0.0386475
0.096	18.52	13.4385	-0.521538	99.9638	-0.0387953
0.104333	18.5221	13.438	-0.523488	99.9605	-0.0389404
0.112667	18.5206	13.4375	-0.525435	99.9568	-0.0390852
0.121	18.5205	13.437	-0.527385	99.9531	-0.0392302
0.129333	18.5173	13.4365	-0.529317	99.9496	-0.039374
0.137667	18.5241	13.4361	-0.531245	99.9465	-0.0395174
0.146	18.5208	13.4358	-0.533117	99.9438	-0.0396567
0.154333	18.5219	13.4354	-0.535058	99.9409	-0.039801
0.162667	18.521	13.435	-0.536959	99.9379	-0.0399424
0.171	18.5198	13.4345	-0.538833	99.9343	-0.0400818
0.179333	18.5283	13.434	-0.540765	99.9309	-0.0402256
0.187667	18.5261	13.4336	-0.542711	99.9275	-0.0403703
0.196	18.5208	13.4332	-0.544626	99.9244	-0.0405127
0.204333	18.5299	13.4328	-0.546557	99.9215	-0.0406564
0.212667	18.5343	13.4324	-0.5485	99.9185	-0.0408009
0.221	18.532	13.4319	-0.550409	99.9152	-0.0409429
0.229333	18.5364	13.4314	-0.552357	99.9116	-0.0410878
0.237667	18.5414	13.4309	-0.554283	99.908	-0.0412311
0.246	18.5396	13.4305	-0.556198	99.9047	-0.0413735
0.254333	18.5423	13.4301	-0.558135	99.9017	-0.0415176
0.262667	18.5473	13.4297	-0.560047	99.8988	-0.0416598
0.271	18.55	13.4293	-0.56196	99.8955	-0.0418022
0.279333	18.558	13.4288	-0.563929	99.8919	-0.0419487
0.287667	18.5597	13.4283	-0.565884	99.8883	-0.0420941
0.296	18.5674	13.4278	-0.567811	99.8848	-0.0422374
0.304333	18.5762	13.4274	-0.569788	99.8817	-0.0423845
0.312667	18.5779	13.427	-0.571778	99.8785	-0.0425325
0.321	18.5856	13.4266	-0.573766	99.8753	-0.0426804
0.329333	18.5959	13.4261	-0.575763	99.8716	-0.0428289
0.337667	18.6048	13.4255	-0.577791	99.8677	-0.0429798
0.346	18.6067	13.425	-0.579796	99.864	-0.0431289
0.354333	18.6133	13.4246	-0.581853	99.8607	-0.0432819
0.362667	18.6228	13.4242	-0.583909	99.8575	-0.0434349
0.371	18.6287	13.4237	-0.585931	99.8541	-0.0435853
0.379333	18.6423	13.4232	-0.588049	99.8506	-0.0437428
0.387667	18.654	13.4228	-0.590116	99.847	-0.0438966
0.396	18.6619	13.4223	-0.592218	99.8436	-0.0440529
0.404333	18.6748	13.4218	-0.594324	99.8402	-0.0442096
0.412667	18.6889	13.4214	-0.596442	99.8371	-0.0443672
0.421	18.6965	13.421	-0.598594	99.8337	-0.0445272
0.429333	18.7108	13.4205	-0.600796	99.8305	-0.0446911
0.437667	18.727	13.4201	-0.602937	99.827	-0.0448503
0.446	18.737	13.4196	-0.605093	99.8236	-0.0450107
0.454333	18.7579	13.4192	-0.607332	99.8204	-0.0451772
0.462667	18.7679	13.4187	-0.609523	99.8172	-0.0453402
0.471	18.7835	13.4183	-0.611746	99.8139	-0.0455056
0.479333	18.8015	13.4178	-0.61395	99.8102	-0.0456695
0.487667	18.8238	13.4173	-0.616199	99.8064	-0.0458368
0.496	18.8333	13.4168	-0.618463	99.8029	-0.0460052
0.504333	18.8497	13.4164	-0.620714	99.7995	-0.0461727
0.512667	18.8763	13.4159	-0.622921	99.7957	-0.0463369
0.521	18.889	13.4154	-0.625239	99.792	-0.0465093
0.529333	18.9103	13.4148	-0.627547	99.7882	-0.046681
0.537667	18.9286	13.4144	-0.629878	99.7846	-0.0468543
0.546	18.9528	13.4139	-0.632192	99.781	-0.0470265
0.554333	18.9692	13.4134	-0.634547	99.7774	-0.0472017
0.562667	18.9896	13.4129	-0.636941	99.7739	-0.0473797
0.571	19.0149	13.4125	-0.639318	99.7704	-0.0475566
0.579333	19.0375	13.412	-0.641715	99.7669	-0.0477349
0.587667	19.0641	13.4115	-0.644113	99.7632	-0.0479132
0.596	19.0972	13.411	-0.646558	99.7597	-0.0480951
0.604333	19.1154	13.4106	-0.648917	99.7562	-0.0482706
0.612667	19.146	13.4101	-0.651288	99.7528	-0.048447
0.621	19.1765	13.4096	-0.653631	99.7491	-0.0486212
0.629333	19.2043	13.4091	-0.656042	99.7454	-0.0488006
0.637667	19.2346	13.4086	-0.658479	99.7416	-0.0489819
0.646	19.263	13.4081	-0.660904	99.7379	-0.0491622
0.654333	19.2966	13.4076	-0.663319	99.7342	-0.0493419
0.662667	19.3249	13.4071	-0.665748	99.7305	-0.0495226
0.671	19.3586	13.4066	-0.668183	99.7269	-0.0497037
0.679333	19.3874	13.4061	-0.670586	99.7232	-0.0498825
0.687667	19.4257	13.4056	-0.673058	99.7196	-0.0500664
0.696	19.4569	13.4051	-0.675562	99.7158	-0.0502526
0.704333	19.4954	13.4046	-0.678084	99.712	-0.0504402
0.712667	19.5321	13.4041	-0.680592	99.7081	-0.0506268
0.721	19.5678	13.4035	-0.683085	99.7042	-0.0508122
0.729333	19.6056	13.403	-0.685599	99.7001	-0.0509992
0.737667	19.6404	13.4025	-0.688106	99.6963	-0.0511857
0.746	19.6746	13.402	-0.690627	99.6923	-0.0513732
0.754333	19.7162	13.4014	-0.693159	99.6882	-0.0515616
0.762667	19.7584	13.4008	-0.695743	99.6839	-0.0517538
0.771	19.7983	13.4003	-0.69833	99.68	-0.0519462
0.779333	19.8396	13.3998	-0.700884	99.6762	-0.0521362
0.787667	19.8849	13.3993	-0.703428	99.6723	-0.0523255
0.796	19.9261	13.3987	-0.706013	99.6683	-0.0525178
0.804333	19.9703	13.3982	-0.708562	99.6644	-0.0527074
0.812667	20.0165	13.3977	-0.71107	99.6606	-0.0528939
0.821	20.0548	13.3972	-0.713633	99.6567	-0.0530846
0.829333	20.1034	13.3967	-0.716225	99.6529	-0.0532774
0.837667	20.1506	13.3962	-0.718805	99.6491	-0.0534693
0.846	20.1948	13.3957	-0.721376	99.6456	-0.0536606
0.854333	20.249	13.3951	-0.723921	99.6417	-0.0538499
0.862667	20.2907	13.3946	-0.726474	99.6377	-0.0540398
0.871	20.353	13.3941	-0.729015	99.6338	-0.0542288
0.879333	20.3964	13.3936	-0.731577	99.6299	-0.0544194
0.887667	20.4511	13.3931	-0.734167	99.6261	-0.0546121
0.896	20.5006	13.3925	-0.736814	99.6222	-0.0548089
0.904333	20.5555	13.392	-0.739377	99.6182	-0.0549996
0.912667	20.6018	13.3915	-0.74192	99.6142	-0.0551887
0.921	20.6559	13.3909	-0.74446	99.6098	-0.0553777
0.929333	20.7195	13.3902	-0.747062	99.6052	-0.0555713
0.937667	20.7708	13.3896	-0.749673	99.6008	-0.0557655
0.946	20.8264	13.3891	-0.752313	99.5965	-0.0559619
0.954333	20.8831	13.3885	-0.754947	99.5921	-0.0561578
0.962667	20.9325	13.3879	-0.757545	99.5878	-0.056351
0.971	20.9954	13.3873	-0.760147	99.5834	-0.0565446
0.979333	21.0512	13.3867	-0.762728	99.5786	-0.0567366
0.987667	21.1123	13.3861	-0.765373	99.5741	-0.0569333
0.996	21.1778	13.3855	-0.767986	99.5695	-0.0571277
1.00433	21.2397	13.3849	-0.770625	99.5654	-0.057324
1.01267	21.3004	13.3843	-0.773219	99.5611	-0.0575169
1.021	21.3617	13.3838	-0.775815	99.557	-0.0577101
1.02933	21.4255	13.3832	-0.778405	99.5528	-0.0579027
1.03767	21.4922	13.3826	-0.781034	99.5487	-0.0580983
1.046	21.5505	13.3821	-0.783663	99.5444	-0.0582938
1.05433	21.6181	13.3815	-0.786296	99.5401	-0.0584897
1.06267	21.6854	13.381	-0.788919	99.5361	-0.0586849
1.071	21.7482	13.3804	-0.791535	99.5319	-0.0588794
1.07933	21.8249	13.3798	-0.79414	99.5277	-0.0590732
1.08767	21.8868	13.3792	-0.796764	99.5233	-0.0592684
1.096	21.9545	13.3787	-0.799396	99.519	-0.0594642
1.10433	22.0213	13.378	-0.80203	99.5145	-0.0596601
1.11267	22.0942	13.3774	-0.804651	99.5098	-0.0598551
1.121	22.1588	13.3768	-0.807318	99.505	-0.0600534
1.12933	22.2353	13.3762	-0.809971	99.5004	-0.0602508
1.13767	22.3028	13.3755	-0.812629	99.4957	-0.0604486
1.146	22.3715	13.3749	-0.815312	99.4908	-0.0606481
1.15433	22.4492	13.3742	-0.81796	99.4861	-0.0608451
1.16267	22.5259	13.3736	-0.820661	99.4814	-0.061046
1.171	22.5979	13.373	-0.823322	99.4766	-0.061244
1.17933	22.6704	13.3723	-0.82594	99.472	-0.0614387
1.18767	22.7496	13.3717	-0.8286	99.4669	-0.0616366
1.196	22.8202	13.371	-0.831305	99.4621	-0.0618377
1.20433	22.8968	13.3704	-0.833976	99.4572	-0.0620365
1.21267	22.9683	13.3697	-0.83665	99.4524	-0.0622354
1.221	23.0474	13.3691	-0.839347	99.4478	-0.062436
1.22933	23.126	13.3685	-0.842044	99.4433	-0.0626366
1.23767	23.2054	13.3678	-0.844781	99.4384	-0.0628402
1.246	23.2867	13.3671	-0.8475	99.4333	-0.0630425
1.25433	23.3578	13.3665	-0.850236	99.4285	-0.063246
1.26267	23.4402	13.3658	-0.852979	99.4236	-0.06345
1.271	23.5216	13.3652	-0.855688	99.419	-0.0636516
1.27933	23.6028	13.3646	-0.858394	99.4143	-0.0638528
1.28767	23.6845	13.3639	-0.861105	99.4095	-0.0640545
1.296	23.7617	13.3633	-0.863874	99.4047	-0.0642605
1.30433	23.8448	13.3626	-0.866587	99.3997	-0.0644623
1.31267	23.9274	13.362	-0.869282	99.3948	-0.0646628
1.321	24.01	13.3613	-0.871964	99.39	-0.0648623
1.32933	24.0916	13.3606	-0.874645	99.385	-0.0650617
1.33767	24.1751	13.36	-0.877357	99.38	-0.0652634
1.346	24.2541	13.3593	-0.880064	99.3749	-0.0654648
1.35433	24.3439	13.3586	-0.882808	99.3698	-0.0656689
1.36267	24.4245	13.3579	-0.885548	99.3647	-0.0658727
1.371	24.5096	13.3572	-0.888293	99.3592	-0.0660769
1.37933	24.5942	13.3564	-0.890993	99.3537	-0.0662777
1.38767	24.6817	13.3557	-0.893725	99.3483	-0.0664809
1.396	24.7728	13.355	-0.896442	99.3427	-0.0666831
1.40433	24.8591	13.3543	-0.899192	99.3374	-0.0668876
1.41267	24.9409	13.3535	-0.901968	99.3322	-0.0670941
1.421	25.0313	13.3528	-0.904707	99.3266	-0.0672979
1.42933	25.1215	13.352	-0.907468	99.321	-0.0675032
1.43767	25.2045	13.3513	-0.910225	99.3153	-0.0677083
1.446	25.2962	13.3505	-0.912963	99.3094	-0.067912
1.45433	25.3872	13.3498	-0.915669	99.3041	-0.0681133
1.46267	25.4724	13.3491	-0.918418	99.2988	-0.0683178
1.471	25.5614	13.3483	-0.921184	99.2934	-0.0685235
1.47933	25.6571	13.3476	-0.923978	99.2879	-0.0687313
1.48767	25.7394	13.3469	-0.926798	99.2825	-0.0689411
1.496	25.8356	13.3461	-0.929624	99.2769	-0.0691514
1.50433	25.9271	13.3454	-0.932455	99.2715	-0.0693619
1.51267	26.0174	13.3446	-0.935285	99.2659	-0.0695725
1.521	26.1056	13.3439	-0.938104	99.2605	-0.0697822
1.52933	26.1976	13.3432	-0.940925	99.2552	-0.069992
1.53767	26.2863	13.3424	-0.943763	99.2496	-0.0702031
1.546	26.3753	13.3416	-0.946569	99.2437	-0.0704118
1.55433	26.4693	13.3409	-0.949364	99.2379	-0.0706198
1.56267	26.5633	13.3401	-0.952144	99.2323	-0.0708266
1.571	26.657	13.3393	-0.954932	99.2265	-0.0710339
1.57933	26.7473	13.3385	-0.957693	99.2205	-0.0712393
1.58767	26.8427	13.3377	-0.960484	99.2145	-0.0714469
1.596	26.943	13.3369	-0.963287	99.2085	-0.0716554
1.60433	27.0367	13.3361	-0.966081	99.2025	-0.0718633
1.61267	27.1316	13.3353	-0.968919	99.1963	-0.0720744
1.621	27.2247	13.3345	-0.971738	99.1902	-0.072284
1.62933	27.3114	13.3337	-0.974539	99.1842	-0.0724924
1.63767	27.4045	13.3328	-0.977353	99.178	-0.0727017
1.646	27.5008	13.332	-0.980205	99.1717	-0.0729139
1.65433	27.5938	13.3311	-0.983031	99.1654	-0.0731241
1.66267	27.692	13.3303	-0.985875	99.1592	-0.0733357
1.671	27.792	13.3295	-0.988698	99.1531	-0.0735456
1.67933	27.8772	13.3287	-0.991514	99.1471	-0.0737551
1.68767	27.9815	13.3278	-0.994339	99.141	-0.0739653
1.696	28.0755	13.327	-0.997129	99.1348	-0.0741728
1.70433	28.1703	13.3262	-0.999952	99.1287	-0.0743828
1.71267	28.2659	13.3254	-1.00282	99.1225	-0.0745961
1.721	28.3617	13.3245	-1.00568	99.1162	-0.0748088
1.72933	28.4609	13.3237	-1.00848	99.11	-0.0750175
1.73767	28.5569	13.3229	-1.01133	99.1039	-0.0752289
1.746	28.6517	13.322	-1.01416	99.0975	-0.0754397
1.75433	28.744	13.3211	-1.01702	99.0911	-0.0756521
1.76267	28.8394	13.3202	-1.01985	99.0845	-0.0758631
1.771	28.9335	13.3194	-1.0227	99.0779	-0.0760753
1.77933	29.029	13.3185	-1.02557	99.0714	-0.0762887
1.78767	29.1335	13.3176	-1.02842	99.0648	-0.0765001
1.796	29.2249	13.3167	-1.03122	99.0582	-0.0767085
1.80433	29.3262	13.3158	-1.03403	99.0518	-0.0769175
1.81267	29.4166	13.315	-1.03689	99.0453	-0.0771303
1.821	29.509	13.3141	-1.03969	99.0385	-0.0773391
1.82933	29.6112	13.3132	-1.04253	99.0319	-0.0775497
1.83767	29.7093	13.3123	-1.04537	99.0252	-0.0777611
1.846	29.808	13.3113	-1.04823	99.0183	-0.0779739
1.85433	29.9053	13.3104	-1.05109	99.0116	-0.0781869
1.86267	30.0038	13.3095	-1.05398	99.0048	-0.0784017
1.871	30.0986	13.3086	-1.05684	98.9979	-0.0786147
1.87933	30.1916	13.3077	-1.05974	98.9911	-0.0788299
1.88767	30.2943	13.3067	-1.06261	98.9841	-0.0790436
1.896	30.3932	13.3058	-1.06545	98.977	-0.0792549
1.90433	30.4929	13.3048	-1.06832	98.9699	-0.0794685
1.91267	30.5898	13.3039	-1.0712	98.9628	-0.079683
1.921	30.6907	13.3029	-1.07406	98.9558	-0.0798956
1.92933	30.7895	13.302	-1.07695	98.9487	-0.0801103
1.93767	30.8759	13.3011	-1.0798	98.9417	-0.0803225
1.946	30.9845	13.3001	-1.08262	98.9347	-0.0805321
1.95433	31.0773	13.2992	-1.08548	98.9276	-0.0807449
1.96267	31.1816	13.2982	-1.08834	98.9204	-0.0809576
1.971	31.2765	13.2972	-1.09122	98.913	-0.0811717
1.97933	31.3692	13.2962	-1.09413	98.9059	-0.0813881
1.98767	31.463	13.2952	-1.09703	98.8986	-0.0816043
1.996	31.56	13.2943	-1.09992	98.8913	-0.0818188
2.00433	31.6575	13.2933	-1.10278	98.8841	-0.0820318
2.01267	31.7569	13.2923	-1.10565	98.8767	-0.0822455
2.021	31.8506	13.2913	-1.10856	98.8693	-0.0824616
2.02933	31.9534	13.2903	-1.11147	98.8618	-0.0826786
2.03767	32.0455	13.2893	-1.11434	98.8542	-0.0828919
2.046	32.1422	13.2883	-1.1172	98.8467	-0.0831044
2.05433	32.2412	13.2873	-1.12009	98.8393	-0.0833197
2.06267	32.3342	13.2862	-1.12295	98.8315	-0.0835322
2.071	32.4361	13.2852	-1.12581	98.8239	-0.0837451
2.07933	32.5251	13.2842	-1.12864	98.8163	-0.0839552
2.08767	32.6249	13.2832	-1.1315	98.8086	-0.0841683
2.096	32.7229	13.2821	-1.13434	98.8008	-0.0843795
2.10433	32.8235	13.281	-1.13717	98.7929	-0.0845903
2.11267	32.9119	13.28	-1.14003	98.7848	-0.0848023
2.121	33.0166	13.2789	-1.14292	98.777	-0.0850175
2.12933	33.1097	13.2779	-1.14578	98.7692	-0.0852307
2.13767	33.2006	13.2768	-1.14861	98.7612	-0.0854407
2.146	33.2982	13.2757	-1.15148	98.7533	-0.0856545
2.15433	33.4031	13.2747	-1.15432	98.7454	-0.0858655
2.16267	33.4972	13.2736	-1.15716	98.7375	-0.0860767
2.171	33.587	13.2725	-1.16	98.7295	-0.0862884
2.17933	33.6853	13.2715	-1.16287	98.7216	-0.0865014
2.18767	33.7804	13.2705	-1.16572	98.7141	-0.0867135
2.196	33.8726	13.2694	-1.16856	98.7063	-0.086925
2.20433	33.9724	13.2683	-1.17138	98.6982	-0.0871347
2.21267	34.0616	13.2672	-1.17423	98.6898	-0.0873469
2.221	34.1555	13.2661	-1.17707	98.6819	-0.0875579
2.22933	34.2515	13.265	-1.17992	98.6738	-0.0877703
2.23767	34.3494	13.2639	-1.18277	98.6655	-0.0879821
2.246	34.4442	13.2628	-1.1856	98.657	-0.0881926
2.25433	34.5439	13.2616	-1.18845	98.6486	-0.0884048
2.26267	34.6347	13.2605	-1.1913	98.6403	-0.0886165
2.271	34.7254	13.2594	-1.19412	98.6317	-0.0888263
2.27933	34.8208	13.2582	-1.19693	98.6232	-0.0890351
2.28767	34.9166	13.2571	-1.19973	98.6147	-0.089244
2.296	35.0118	13.256	-1.20257	98.6064	-0.0894547
2.30433	35.1047	13.2548	-1.2054	98.5978	-0.0896656
2.31267	35.1957	13.2537	-1.20819	98.5893	-0.0898725
2.321	35.292	13.2525	-1.21099	98.5809	-0.0900813
2.32933	35.3813	13.2514	-1.21383	98.5725	-0.0902925
2.33767	35.4798	13.2503	-1.21663	98.564	-0.0905003
2.346	35.57	13.2491	-1.2194	98.5556	-0.0907071
2.35433	35.6643	13.248	-1.22217	98.5469	-0.090913
2.36267	35.759	13.2469	-1.22496	98.5386	-0.0911203
2.371	35.8486	13.2457	-1.22773	98.53	-0.0913267
2.37933	35.948	13.2445	-1.23046	98.5213	-0.0915295
2.38767	36.0366	13.2434	-1.2332	98.5127	-0.0917335
2.396	36.1286	13.2422	-1.23595	98.504	-0.0919382
2.40433	36.2184	13.241	-1.2387	98.4953	-0.0921421
2.41267	36.3079	13.2399	-1.24145	98.4868	-0.0923471
2.421	36.4031	13.2387	-1.24419	98.4781	-0.0925509
2.42933	36.4914	13.2375	-1.24693	98.4691	-0.0927546
2.43767	36.5859	13.2363	-1.2497	98.4604	-0.0929604
2.446	36.6778	13.2351	-1.25241	98.4513	-0.0931624
2.45433	36.7695	13.2339	-1.25513	98.4425	-0.0933646
2.46267	36.8577	13.2328	-1.25787	98.4338	-0.0935687
2.471	36.9481	13.2316	-1.26061	98.4247	-0.0937721
2.47933	37.0386	13.2303	-1.26333	98.4157	-0.0939742
2.48767	37.1306	13.2291	-1.26605	98.4067	-0.0941768
2.496	37.2197	13.2279	-1.26871	98.3979	-0.0943745
2.50433	37.3079	13.2268	-1.27135	98.3892	-0.0945714
2.51267	37.3918	13.2256	-1.27402	98.3801	-0.0947696
2.521	37.489	13.2243	-1.27666	98.3711	-0.0949664
2.52933	37.5782	13.2231	-1.27931	98.362	-0.0951633
2.53767	37.6646	13.2219	-1.28197	98.3529	-0.0953614
2.546	37.7591	13.2207	-1.28459	98.344	-0.095556
2.55433	37.8505	13.2195	-1.28723	98.3353	-0.095752
2.56267	37.9375	13.2183	-1.28985	98.3264	-0.0959471
2.571	38.0247	13.2171	-1.29245	98.3172	-0.0961409
2.57933	38.1169	13.2158	-1.29507	98.3076	-0.0963357
2.58767	38.2023	13.2145	-1.29769	98.2981	-0.0965306
2.596	38.2993	13.2133	-1.30026	98.2892	-0.0967219
2.60433	38.3826	13.2121	-1.30282	98.2801	-0.0969118
2.61267	38.4721	13.2109	-1.30539	98.2711	-0.0971033
2.621	38.5626	13.2097	-1.30793	98.2623	-0.097292
2.62933	38.639	13.2085	-1.31048	98.2531	-0.0974822
2.63767	38.7311	13.2072	-1.313	98.2439	-0.0976697
2.646	38.817	13.206	-1.31548	98.2349	-0.0978541
2.65433	38.9001	13.2048	-1.31798	98.2259	-0.09804
2.66267	38.9918	13.2036	-1.32051	98.2171	-0.0982282
2.671	39.0767	13.2024	-1.32304	98.2082	-0.0984165
2.67933	39.1603	13.2012	-1.3255	98.1991	-0.0985995
2.68767	39.2424	13.2	-1.32794	98.1901	-0.098781
2.696	39.3308	13.1988	-1.33037	98.1811	-0.0989614
2.70433	39.4228	13.1975	-1.33279	98.1718	-0.0991415
2.71267	39.5082	13.1963	-1.33519	98.1626	-0.0993203
2.721	39.5913	13.1951	-1.33761	98.1533	-0.0994998
2.72933	39.6849	13.1938	-1.34002	98.1439	-0.0996795
2.73767	39.7695	13.1926	-1.3424	98.1348	-0.0998564
2.746	39.8529	13.1913	-1.34471	98.1255	-0.100028
2.75433	39.9398	13.1901	-1.347	98.1163	-0.100198
2.76267	40.0278	13.1888	-1.34935	98.107	-0.100374
2.771	40.1104	13.1876	-1.35171	98.0975	-0.100549
2.77933	40.1899	13.1863	-1.35403	98.0879	-0.100721
2.78767	40.2734	13.185	-1.35632	98.0785	-0.100892
2.796	40.3627	13.1838	-1.35863	98.0692	-0.101063
2.80433	40.4481	13.1825	-1.36089	98.0601	-0.101232
2.81267	40.5338	13.1813	-1.36313	98.0509	-0.101398
2.821	40.615	13.18	-1.36532	98.0416	-0.101561
2.82933	40.7039	13.1788	-1.36751	98.0326	-0.101724
2.83767	40.7853	13.1776	-1.36971	98.0236	-0.101888
2.846	40.8714	13.1764	-1.37185	98.0146	-0.102047
2.85433	40.9538	13.1752	-1.37402	98.0056	-0.102209
2.86267	41.0351	13.174	-1.37616	97.9966	-0.102367
2.871	41.1189	13.1728	-1.37827	97.9876	-0.102524
2.87933	41.2033	13.1716	-1.38035	97.9785	-0.102679
2.88767	41.2861	13.1703	-1.38241	97.9693	-0.102833
2.896	41.3792	13.1691	-1.38449	97.9603	-0.102987
2.90433	41.4537	13.1679	-1.38657	97.951	-0.103142
2.91267	41.5433	13.1666	-1.38864	97.9416	-0.103296
2.921	41.6188	13.1654	-1.39064	97.9324	-0.103445
2.92933	41.7025	13.1641	-1.39265	97.9231	-0.103594
2.93767	41.7846	13.1629	-1.39458	97.9139	-0.103737
2.946	41.8687	13.1616	-1.39649	97.9047	-0.10388
2.95433	41.9537	13.1604	-1.39842	97.8955	-0.104024
2.96267	42.0378	13.1592	-1.40028	97.8862	-0.104161
2.971	42.1189	13.1579	-1.40214	97.8772	-0.1043
2.97933	42.1955	13.1567	-1.40399	97.8679	-0.104438
2.98767	42.2781	13.1555	-1.40579	97.8588	-0.104571
2.996	42.3666	13.1542	-1.40756	97.8496	-0.104703
3.00433	42.4449	13.153	-1.40933	97.8406	-0.104835
3.01267	42.5312	13.1518	-1.41104	97.8316	-0.104962
3.021	42.6059	13.1506	-1.41275	97.8226	-0.10509
3.02933	42.6847	13.1494	-1.41445	97.8136	-0.105216
3.03767	42.774	13.1482	-1.41616	97.8045	-0.105343
3.046	42.8542	13.147	-1.41785	97.7956	-0.105469
3.05433	42.934	13.1458	-1.41947	97.7866	-0.105589
3.06267	43.0141	13.1446	-1.42108	97.7777	-0.105709
3.071	43.0929	13.1434	-1.42263	97.7689	-0.105825
3.07933	43.1797	13.1422	-1.42417	97.7602	-0.105939
3.08767	43.259	13.141	-1.42569	97.7512	-0.106052
3.096	43.3412	13.1398	-1.42722	97.7425	-0.106165
3.10433	43.4216	13.1387	-1.42867	97.7338	-0.106274
3.11267	43.498	13.1375	-1.4301	97.725	-0.10638
3.121	43.5798	13.1363	-1.43152	97.7162	-0.106486
3.12933	43.6567	13.1351	-1.43293	97.7074	-0.10659
3.13767	43.7383	13.134	-1.43435	97.6987	-0.106696
3.146	43.8183	13.1328	-1.43572	97.6899	-0.106798
3.15433	43.8997	13.1316	-1.43708	97.681	-0.106899
3.16267	43.9833	13.1304	-1.4384	97.672	-0.106997
3.171	44.0581	13.1292	-1.43971	97.6632	-0.107095
3.17933	44.1406	13.128	-1.441	97.6544	-0.107191
3.18767	44.2204	13.1268	-1.44227	97.6454	-0.107285
3.196	44.2984	13.1256	-1.4435	97.6367	-0.107377
3.20433	44.3821	13.1245	-1.44466	97.6282	-0.107463
3.21267	44.4592	13.1233	-1.44579	97.6198	-0.107547
3.221	44.5381	13.1222	-1.44691	97.6112	-0.107631
3.22933	44.6201	13.121	-1.44799	97.6026	-0.107711
3.23767	44.6936	13.1199	-1.44907	97.5941	-0.107791
3.246	44.7745	13.1188	-1.45012	97.5859	-0.107869
3.25433	44.8531	13.1176	-1.45111	97.5774	-0.107943
3.26267	44.9338	13.1165	-1.45204	97.5688	-0.108012
3.271	45.0104	13.1154	-1.45301	97.5606	-0.108084
3.27933	45.0945	13.1143	-1.45397	97.5523	-0.108156
3.28767	45.1729	13.1131	-1.45489	97.5438	-0.108224
3.296	45.2472	13.112	-1.45581	97.5355	-0.108292
3.30433	45.3265	13.1109	-1.45665	97.5272	-0.108355
3.31267	45.404	13.1098	-1.4575	97.5187	-0.108418
3.321	45.4866	13.1086	-1.4583	97.5102	-0.108478
3.32933	45.569	13.1075	-1.4591	97.5019	-0.108537
3.33767	45.6434	13.1064	-1.45986	97.4938	-0.108594
3.346	45.7221	13.1053	-1.46067	97.4857	-0.108654
3.35433	45.802	13.1042	-1.46142	97.4775	-0.10871
3.36267	45.8824	13.1031	-1.46215	97.4692	-0.108764
3.371	45.9578	13.102	-1.46283	97.461	-0.108815
3.37933	46.0421	13.1009	-1.46348	97.4529	-0.108863
3.38767	46.1186	13.0998	-1.46413	97.4447	-0.108911
3.396	46.1929	13.0987	-1.46476	97.4368	-0.108958
3.40433	46.2762	13.0977	-1.46536	97.4288	-0.109003
3.41267	46.3524	13.0966	-1.46593	97.4208	-0.109045
3.421	46.4318	13.0955	-1.4665	97.4126	-0.109087
3.42933	46.5027	13.0944	-1.46702	97.4048	-0.109126
3.43767	46.584	13.0933	-1.46751	97.3966	-0.109162
3.446	46.6648	13.0922	-1.46795	97.3885	-0.109196
3.45433	46.7437	13.0912	-1.46844	97.3806	-0.109232
3.46267	46.8214	13.0901	-1.46887	97.3727	-0.109264
3.471	46.9008	13.0891	-1.46929	97.3649	-0.109295
3.47933	46.9792	13.088	-1.46968	97.3571	-0.109324
3.48767	47.0594	13.087	-1.47008	97.3495	-0.109354
3.496	47.1379	13.086	-1.47046	97.3417	-0.109383
3.50433	47.2141	13.0849	-1.47084	97.334	-0.109411
3.51267	47.2923	13.0839	-1.47113	97.3261	-0.109432
3.521	47.3709	13.0829	-1.4714	97.3186	-0.109452
3.52933	47.4461	13.0818	-1.47165	97.3109	-0.10947
3.53767	47.5232	13.0808	-1.47188	97.3033	-0.109488
3.546	47.6044	13.0798	-1.47215	97.2958	-0.109508
3.55433	47.6773	13.0787	-1.47234	97.288	-0.109522
3.56267	47.7584	13.0777	-1.47247	97.2803	-0.109532
3.571	47.835	13.0767	-1.47259	97.2725	-0.109541
3.57933	47.9122	13.0756	-1.47269	97.265	-0.109548
3.58767	47.9963	13.0746	-1.47276	97.2572	-0.109553
3.596	48.0698	13.0736	-1.4729	97.2496	-0.109564
3.60433	48.1483	13.0726	-1.47302	97.2421	-0.109573
3.61267	48.224	13.0716	-1.47311	97.2347	-0.10958
3.621	48.3047	13.0706	-1.47311	97.2272	-0.10958
3.62933	48.382	13.0695	-1.47312	97.2197	-0.10958
3.63767	48.4596	13.0686	-1.47315	97.2124	-0.109582
3.646	48.5401	13.0676	-1.47316	97.205	-0.109583
3.65433	48.6113	13.0666	-1.47314	97.1976	-0.109582
3.66267	48.688	13.0656	-1.47311	97.1902	-0.109579
3.671	48.765	13.0646	-1.47306	97.183	-0.109575
3.67933	48.8457	13.0637	-1.47293	97.1758	-0.109566
3.68767	48.9242	13.0627	-1.47281	97.1685	-0.109557
3.696	48.9966	13.0617	-1.4727	97.1611	-0.109549
3.70433	49.076	13.0607	-1.4726	97.154	-0.109541
3.71267	49.1575	13.0597	-1.47247	97.1468	-0.109532
3.721	49.2321	13.0588	-1.47232	97.1395	-0.109521
3.72933	49.3146	13.0578	-1.47217	97.1323	-0.109509
3.73767	49.387	13.0569	-1.47201	97.1252	-0.109497
3.746	49.4644	13.0559	-1.47182	97.1183	-0.109484
3.75433	49.5431	13.055	-1.47167	97.1113	-0.109472
3.76267	49.6177	13.054	-1.47149	97.1041	-0.109459
3.771	49.6996	13.0531	-1.47129	97.0971	-0.109444
3.77933	49.78	13.0521	-1.47107	97.0902	-0.109428
3.78767	49.856	13.0512	-1.47084	97.083	-0.109411
3.796	49.9302	13.0502	-1.4706	97.0758	-0.109393
3.80433	50.0098	13.0493	-1.47035	97.0688	-0.109374
3.81267	50.0889	13.0483	-1.47008	97.0619	-0.109354
3.821	50.1677	13.0474	-1.4698	97.0551	-0.109333
3.82933	50.2426	13.0465	-1.46949	97.0481	-0.10931
3.83767	50.3183	13.0456	-1.46911	97.0412	-0.109281
3.846	50.3977	13.0446	-1.46877	97.0343	-0.109256
3.85433	50.4753	13.0437	-1.46844	97.0272	-0.109232
3.86267	50.5548	13.0427	-1.46811	97.0203	-0.109207
3.871	50.6278	13.0418	-1.46776	97.0135	-0.109181
3.87933	50.7167	13.041	-1.46739	97.0069	-0.109154
3.88767	50.7912	13.04	-1.467	97.0001	-0.109125
3.896	50.8674	13.0391	-1.4666	96.9934	-0.109095
3.90433	50.9461	13.0382	-1.46621	96.9865	-0.109066
3.91267	51.0199	13.0373	-1.46588	96.9798	-0.109041
3.921	51.1014	13.0364	-1.46554	96.973	-0.109016
3.92933	51.1775	13.0355	-1.46511	96.9663	-0.108984
3.93767	51.2576	13.0346	-1.46466	96.9598	-0.108951
3.946	51.3327	13.0337	-1.46423	96.9531	-0.108919
3.95433	51.4147	13.0328	-1.46377	96.9464	-0.108885
3.96267	51.4884	13.0319	-1.46329	96.9397	-0.108849
3.971	51.5715	13.031	-1.46283	96.9331	-0.108814
3.97933	51.646	13.0301	-1.4624	96.9263	-0.108783
3.98767	51.7247	13.0292	-1.46191	96.9197	-0.108746
3.996	51.8051	13.0283	-1.46139	96.9129	-0.108708
4.00433	51.8839	13.0274	-1.46086	96.9063	-0.108668
4.01267	51.9621	13.0266	-1.4604	96.8999	-0.108634
4.021	52.037	13.0257	-1.4599	96.8935	-0.108596
4.02933	52.1187	13.0248	-1.45938	96.887	-0.108558
4.03767	52.1978	13.024	-1.45888	96.8805	-0.108521
4.046	52.2737	13.0231	-1.45835	96.8739	-0.108481
4.05433	52.3555	13.0222	-1.45781	96.8674	-0.108442
4.06267	52.4334	13.0213	-1.45727	96.861	-0.108401
4.071	52.5126	13.0205	-1.45673	96.8547	-0.108361
4.07933	52.5917	13.0197	-1.45614	96.8485	-0.108317
4.08767	52.6691	13.0188	-1.45559	96.8421	-0.108276
4.096	52.7472	13.0179	-1.45501	96.8357	-0.108233
4.10433	52.8252	13.0171	-1.45441	96.8292	-0.108189
4.11267	52.9016	13.0162	-1.45383	96.823	-0.108145
4.121	52.9816	13.0154	-1.45326	96.8167	-0.108103
4.12933	53.0605	13.0146	-1.45269	96.8108	-0.10806
4.13767	53.135	13.0138	-1.4521	96.8047	-0.108016
4.146	53.2183	13.0129	-1.45149	96.7983	-0.107971
4.15433	53.2943	13.0121	-1.4509	96.7921	-0.107927
4.16267	53.3726	13.0113	-1.45033	96.786	-0.107885
4.171	53.4491	13.0104	-1.44974	96.7797	-0.107841
4.17933	53.5278	13.0096	-1.44911	96.7734	-0.107794
4.18767	53.6045	13.0087	-1.44851	96.7672	-0.10775
4.196	53.6831	13.0079	-1.44788	96.7609	-0.107703
4.20433	53.7687	13.007	-1.44723	96.7547	-0.107655
4.21267	53.8443	13.0062	-1.44661	96.7483	-0.107608
4.221	53.9188	13.0054	-1.44596	96.7422	-0.10756
4.22933	54.0077	13.0046	-1.44528	96.7364	-0.107509
4.23767	54.0875	13.0038	-1.44459	96.7302	-0.107458
4.246	54.1632	13.0029	-1.4439	96.7239	-0.107406
4.25433	54.2377	13.0021	-1.44321	96.7178	-0.107355
4.26267	54.3153	13.0013	-1.44255	96.7118	-0.107306
4.271	54.3986	13.0005	-1.44186	96.7057	-0.107255
4.27933	54.4768	12.9996	-1.44117	96.6996	-0.107204
4.28767	54.5614	12.9988	-1.4405	96.6935	-0.107154
4.296	54.6454	12.998	-1.43978	96.6875	-0.1071
4.30433	54.7218	12.9972	-1.43909	96.6814	-0.107049
4.31267	54.8019	12.9964	-1.43846	96.6752	-0.107002
4.321	54.8816	12.9955	-1.43782	96.6691	-0.106954
4.32933	54.9586	12.9947	-1.43714	96.6632	-0.106904
4.33767	55.0449	12.9939	-1.43644	96.6572	-0.106852
4.346	55.1275	12.9931	-1.43572	96.6511	-0.106798
4.35433	55.198	12.9923	-1.43499	96.6453	-0.106744
4.36267	55.2776	12.9916	-1.43429	96.6396	-0.106692
4.371	55.3653	12.9908	-1.43358	96.6337	-0.106639
4.37933	55.4422	12.99	-1.43289	96.6278	-0.106588
4.38767	55.5203	12.9892	-1.4322	96.6218	-0.106536
4.396	55.6047	12.9884	-1.43148	96.6157	-0.106482
4.40433	55.6811	12.9876	-1.43075	96.6098	-0.106428
4.41267	55.7612	12.9868	-1.43004	96.6039	-0.106376
4.421	55.8432	12.986	-1.42935	96.598	-0.106324
4.42933	55.9224	12.9852	-1.42869	96.5922	-0.106275
4.43767	56	12.9844	-1.42805	96.5863	-0.106227
4.446	56.079	12.9836	-1.42736	96.5802	-0.106176
4.45433	56.165	12.9828	-1.42664	96.5743	-0.106123
4.46267	56.2353	12.982	-1.42593	96.5684	-0.106069
4.471	56.3221	12.9812	-1.42521	96.5623	-0.106016
4.47933	56.4065	12.9804	-1.42449	96.5565	-0.105962
4.48767	56.4853	12.9796	-1.42379	96.5508	-0.10591
4.496	56.5706	12.9788	-1.42311	96.5448	-0.10586
4.50433	56.648	12.9781	-1.42241	96.5391	-0.105808
4.51267	56.7262	12.9773	-1.42169	96.5333	-0.105754
4.521	56.8103	12.9765	-1.42097	96.5276	-0.105701
4.52933	56.8854	12.9757	-1.42026	96.5218	-0.105648
4.53767	56.9699	12.975	-1.41958	96.516	-0.105598
4.546	57.0566	12.9742	-1.41891	96.5103	-0.105548
4.55433	57.1368	12.9734	-1.41821	96.5047	-0.105495
4.56267	57.2153	12.9727	-1.41752	96.4989	-0.105444
4.571	57.2983	12.9719	-1.41686	96.4932	-0.105395
4.57933	57.3753	12.9711	-1.41615	96.4875	-0.105343
4.58767	57.4559	12.9704	-1.41544	96.4818	-0.105289
4.596	57.5401	12.9696	-1.41477	96.4761	-0.10524
4.60433	57.6197	12.9688	-1.41409	96.4703	-0.105189
4.61267	57.6987	12.9681	-1.4134	96.4649	-0.105138
4.621	57.7842	12.9673	-1.41273	96.4591	-0.105088
4.62933	57.8618	12.9665	-1.412	96.4534	-0.105034
4.63767	57.9464	12.9658	-1.41135	96.4478	-0.104985
4.646	58.028	12.965	-1.41069	96.4423	-0.104936
4.65433	58.1064	12.9643	-1.40997	96.4367	-0.104883
4.66267	58.1933	12.9635	-1.40932	96.4311	-0.104834
4.671	58.2759	12.9628	-1.4087	96.4254	-0.104788
4.67933	58.3577	12.962	-1.40807	96.4199	-0.104741
4.68767	58.4404	12.9612	-1.40743	96.414	-0.104694
4.696	58.5196	12.9605	-1.40681	96.4082	-0.104648
4.70433	58.5965	12.9597	-1.40619	96.4025	-0.104601
4.71267	58.6793	12.9589	-1.40561	96.3967	-0.104558
4.721	58.758	12.9582	-1.40501	96.3911	-0.104513
4.72933	58.8473	12.9574	-1.40437	96.3853	-0.104466
4.73767	58.9284	12.9566	-1.40378	96.3795	-0.104422
4.746	59.0134	12.9558	-1.40315	96.3738	-0.104376
4.75433	59.0955	12.9551	-1.40252	96.3682	-0.104329
4.76267	59.1785	12.9543	-1.40191	96.3625	-0.104283
4.771	59.2608	12.9536	-1.40132	96.3569	-0.104239
4.77933	59.3516	12.9528	-1.40069	96.3512	-0.104192
4.78767	59.4296	12.952	-1.4001	96.3454	-0.104148
4.796	59.5086	12.9513	-1.39954	96.3399	-0.104106
4.80433	59.5885	12.9505	-1.39898	96.3342	-0.104065
4.81267	59.6701	12.9497	-1.39847	96.3283	-0.104027
4.821	59.7569	12.9489	-1.39793	96.3225	-0.103987
4.82933	59.8342	12.9482	-1.39744	96.3168	-0.103951
4.83767	59.9209	12.9474	-1.39694	96.311	-0.103913
4.846	60.0046	12.9466	-1.39642	96.3054	-0.103874
4.85433	60.0852	12.9459	-1.39593	96.2998	-0.103838
4.86267	60.1706	12.9451	-1.39553	96.2941	-0.103808
4.871	60.2532	12.9444	-1.39513	96.2885	-0.103779
4.87933	60.3389	12.9436	-1.39472	96.2828	-0.103748
4.88767	60.4217	12.9428	-1.39428	96.2772	-0.103716
4.896	60.506	12.9421	-1.39384	96.2715	-0.103683
4.90433	60.585	12.9413	-1.39342	96.2658	-0.103651
4.91267	60.6716	12.9405	-1.393	96.2601	-0.10362
4.921	60.7515	12.9398	-1.39261	96.2542	-0.103591
4.92933	60.8353	12.939	-1.39225	96.2482	-0.103565
4.93767	60.9172	12.9382	-1.39191	96.2424	-0.103539
4.946	61.009	12.9374	-1.39154	96.2366	-0.103512
4.95433	61.0878	12.9366	-1.39116	96.2306	-0.103483
4.96267	61.1661	12.9358	-1.39078	96.2246	-0.103455
4.971	61.2506	12.935	-1.39046	96.2188	-0.103432
4.97933	61.3366	12.9342	-1.39017	96.213	-0.103409
4.98767	61.4176	12.9334	-1.3899	96.2072	-0.103389
4.996	61.506	12.9327	-1.38964	96.2014	-0.10337
5.00433	61.5874	12.9319	-1.38941	96.1957	-0.103353
5.01267	61.6744	12.9311	-1.38918	96.1897	-0.103336
5.021	61.7519	12.9303	-1.38894	96.1837	-0.103318
5.02933	61.8418	12.9295	-1.38876	96.1777	-0.103305
5.03767	61.9236	12.9287	-1.38857	96.1718	-0.103291
5.046	62.0075	12.9279	-1.3884	96.166	-0.103278
5.05433	62.0901	12.9271	-1.38825	96.16	-0.103267
5.06267	62.1748	12.9263	-1.38815	96.1541	-0.103259
5.071	62.2596	12.9255	-1.38805	96.1479	-0.103252
5.07933	62.3386	12.9246	-1.38795	96.1417	-0.103244
5.08767	62.4255	12.9238	-1.38784	96.1356	-0.103236
5.096	62.5113	12.923	-1.38777	96.1294	-0.103231
5.10433	62.5934	12.9222	-1.38773	96.1232	-0.103228
5.11267	62.6753	12.9213	-1.38771	96.117	-0.103227
5.121	62.7577	12.9205	-1.3877	96.1109	-0.103226
5.12933	62.8449	12.9196	-1.38771	96.1045	-0.103227
5.13767	62.9323	12.9188	-1.38775	96.0983	-0.103229
5.146	63.009	12.9179	-1.38779	96.0919	-0.103233
5.15433	63.0951	12.9171	-1.38787	96.0859	-0.103239
5.16267	63.1788	12.9163	-1.38797	96.0796	-0.103246
5.171	63.2662	12.9155	-1.38812	96.0734	-0.103257
5.17933	63.351	12.9146	-1.38826	96.0673	-0.103268
5.18767	63.4358	12.9138	-1.38844	96.0612	-0.103281
5.196	63.5192	12.913	-1.38861	96.0548	-0.103293
5.20433	63.6054	12.9121	-1.38879	96.0484	-0.103307
5.21267	63.6836	12.9112	-1.38903	96.042	-0.103325
5.221	63.7711	12.9104	-1.38924	96.0356	-0.103341
5.22933	63.8532	12.9095	-1.38946	96.0289	-0.103357
5.23767	63.9357	12.9086	-1.3897	96.0223	-0.103375
5.246	64.0202	12.9077	-1.39	96.0158	-0.103397
5.25433	64.1065	12.9068	-1.39027	96.0092	-0.103417
5.26267	64.1922	12.9059	-1.39057	96.0026	-0.103439
5.271	64.277	12.905	-1.39088	95.9959	-0.103462
5.27933	64.3539	12.9041	-1.39123	95.9892	-0.103488
5.28767	64.4452	12.9033	-1.39163	95.9827	-0.103519
5.296	64.5278	12.9024	-1.39203	95.9762	-0.103548
5.30433	64.6083	12.9015	-1.39241	95.9696	-0.103576
5.31267	64.6954	12.9006	-1.39283	95.9631	-0.103608
5.321	64.7772	12.8997	-1.39326	95.9564	-0.103639
5.32933	64.8614	12.8988	-1.39373	95.9497	-0.103674
5.33767	64.9473	12.8979	-1.39423	95.943	-0.103712
5.346	65.0343	12.897	-1.39473	95.9362	-0.103749
5.35433	65.1157	12.8961	-1.39522	95.9297	-0.103785
5.36267	65.2018	12.8952	-1.3957	95.923	-0.103821
5.371	65.2835	12.8943	-1.3962	95.9162	-0.103858
5.37933	65.3694	12.8934	-1.39674	95.9093	-0.103899
5.38767	65.4548	12.8925	-1.39736	95.9024	-0.103944
5.396	65.5373	12.8916	-1.39797	95.8957	-0.10399
5.40433	65.6243	12.8906	-1.3986	95.8888	-0.104037
5.41267	65.7032	12.8897	-1.39921	95.8819	-0.104082
5.421	65.7915	12.8888	-1.39985	95.8748	-0.10413
5.42933	65.8697	12.8878	-1.40051	95.8678	-0.104179
5.43767	65.9601	12.8869	-1.40123	95.8607	-0.104232
5.446	66.0464	12.8859	-1.40198	95.8536	-0.104288
5.45433	66.1303	12.885	-1.40271	95.8466	-0.104342
5.46267	66.2114	12.884	-1.40344	95.8395	-0.104397
5.471	66.2961	12.8831	-1.40415	95.8325	-0.10445
5.47933	66.3815	12.8821	-1.40492	95.8253	-0.104507
5.48767	66.4639	12.8811	-1.4057	95.8181	-0.104565
5.496	66.5473	12.8802	-1.40647	95.811	-0.104622
5.50433	66.6295	12.8792	-1.40729	95.8039	-0.104683
5.51267	66.7147	12.8783	-1.40809	95.7967	-0.104742
5.521	66.8006	12.8773	-1.40887	95.7895	-0.1048
5.52933	66.8844	12.8763	-1.40967	95.7823	-0.10486
5.53767	66.9733	12.8753	-1.4105	95.7749	-0.104922
5.546	67.0559	12.8743	-1.41135	95.7674	-0.104985
5.55433	67.1435	12.8733	-1.41221	95.76	-0.105049
5.56267	67.2268	12.8723	-1.41309	95.7527	-0.105115
5.571	67.3148	12.8713	-1.41397	95.7452	-0.10518
5.57933	67.3974	12.8703	-1.41487	95.7377	-0.105247
5.58767	67.482	12.8693	-1.41577	95.7301	-0.105314
5.596	67.5669	12.8683	-1.4167	95.7226	-0.105383
5.60433	67.648	12.8673	-1.41766	95.715	-0.105455
5.61267	67.7328	12.8663	-1.41862	95.7076	-0.105526
5.621	67.8187	12.8653	-1.41958	95.7003	-0.105598
5.62933	67.9017	12.8643	-1.42057	95.6927	-0.105671
5.63767	67.9809	12.8633	-1.42158	95.6852	-0.105746
5.646	68.0656	12.8622	-1.42257	95.6776	-0.10582
5.65433	68.1544	12.8612	-1.42358	95.67	-0.105895
5.66267	68.2395	12.8602	-1.4246	95.6624	-0.105971
5.671	68.3182	12.8592	-1.4256	95.6548	-0.106045
5.67933	68.402	12.8582	-1.42666	95.6472	-0.106124
5.68767	68.4886	12.8571	-1.42772	95.6394	-0.106203
5.696	68.572	12.856	-1.4288	95.6315	-0.106283
5.70433	68.662	12.855	-1.42989	95.6237	-0.106364
5.71267	68.7476	12.854	-1.43099	95.6161	-0.106446
5.721	68.8306	12.8529	-1.43209	95.6084	-0.106528
5.72933	68.9129	12.8519	-1.43318	95.6006	-0.106609
5.73767	68.9993	12.8508	-1.43429	95.5926	-0.106692
5.746	69.0803	12.8498	-1.43544	95.5847	-0.106777
5.75433	69.1624	12.8487	-1.4366	95.5768	-0.106863
5.76267	69.248	12.8476	-1.43771	95.5688	-0.106946
5.771	69.3292	12.8466	-1.43884	95.561	-0.10703
5.77933	69.4183	12.8455	-1.43997	95.5532	-0.107114
5.78767	69.4983	12.8445	-1.44112	95.5453	-0.107199
5.796	69.5864	12.8434	-1.44228	95.5373	-0.107286
5.80433	69.6701	12.8423	-1.44346	95.5294	-0.107374
5.81267	69.7501	12.8413	-1.44464	95.5214	-0.107461
5.821	69.8337	12.8402	-1.4458	95.5136	-0.107548
5.82933	69.9218	12.8391	-1.44699	95.5057	-0.107636
5.83767	70.0048	12.8381	-1.4482	95.4979	-0.107727
5.846	70.0912	12.837	-1.4494	95.4901	-0.107816
5.85433	70.174	12.836	-1.45059	95.4821	-0.107904
5.86267	70.2635	12.8349	-1.45181	95.474	-0.107995
5.871	70.3423	12.8338	-1.45301	95.466	-0.108084
5.87933	70.4363	12.8327	-1.45419	95.458	-0.108172
5.88767	70.517	12.8316	-1.45539	95.4498	-0.108262
5.896	70.6022	12.8305	-1.45665	95.4415	-0.108355
5.90433	70.6848	12.8294	-1.45789	95.4333	-0.108447
5.91267	70.7684	12.8283	-1.45911	95.4253	-0.108538
5.921	70.8531	12.8272	-1.46033	95.4171	-0.108629
5.92933	70.9343	12.8261	-1.46158	95.4086	-0.108722
5.93767	71.0232	12.825	-1.46284	95.4002	-0.108816
5.946	71.1017	12.8238	-1.4641	95.3919	-0.108909
5.95433	71.1848	12.8227	-1.46539	95.3835	-0.109005
5.96267	71.267	12.8216	-1.46663	95.375	-0.109098
5.971	71.3555	12.8204	-1.46789	95.3666	-0.109191
5.97933	71.4351	12.8193	-1.46917	95.3584	-0.109286
5.98767	71.5237	12.8182	-1.47045	95.3502	-0.109381
5.996	71.6021	12.8171	-1.47172	95.3417	-0.109476
6.00433	71.6884	12.8159	-1.47298	95.3331	-0.10957
6.01267	71.7733	12.8148	-1.47424	95.3247	-0.109664
6.021	71.8575	12.8137	-1.4755	95.3163	-0.109757
6.02933	71.9418	12.8125	-1.47674	95.3079	-0.109849
6.03767	72.0238	12.8114	-1.47801	95.2994	-0.109943
6.046	72.1145	12.8103	-1.47932	95.2912	-0.110041
6.05433	72.1997	12.8092	-1.48061	95.283	-0.110137
6.06267	72.2814	12.808	-1.48186	95.2743	-0.110231
6.071	72.3652	12.8069	-1.48313	95.2656	-0.110325
6.07933	72.4496	12.8057	-1.48443	95.2571	-0.110421
6.08767	72.534	12.8046	-1.48573	95.2489	-0.110518
6.096	72.6106	12.8035	-1.48706	95.2404	-0.110617
6.10433	72.6972	12.8023	-1.4884	95.2319	-0.110717
6.11267	72.7799	12.8012	-1.48976	95.2234	-0.110818
6.121	72.8651	12.8	-1.49107	95.2147	-0.110916
6.12933	72.9517	12.7988	-1.49239	95.2059	-0.111013
6.13767	73.031	12.7976	-1.49373	95.197	-0.111113
6.146	73.118	12.7965	-1.49507	95.1885	-0.111213
6.15433	73.2012	12.7953	-1.49643	95.18	-0.111314
6.16267	73.2844	12.7942	-1.49775	95.1714	-0.111412
6.171	73.3684	12.793	-1.49909	95.1627	-0.111512
6.17933	73.4562	12.7919	-1.50038	95.1542	-0.111608
6.18767	73.5407	12.7907	-1.50169	95.1453	-0.111705
6.196	73.6173	12.7895	-1.50305	95.1366	-0.111806
6.20433	73.7039	12.7884	-1.5044	95.128	-0.111907
6.21267	73.7925	12.7872	-1.50575	95.1191	-0.112007
6.221	73.8693	12.786	-1.50709	95.1103	-0.112107
6.22933	73.9546	12.7848	-1.50843	95.1015	-0.112207
6.23767	74.0349	12.7836	-1.50977	95.0927	-0.112307
6.246	74.122	12.7824	-1.51114	95.0838	-0.112408
6.25433	74.2024	12.7812	-1.51251	95.075	-0.11251
6.26267	74.2856	12.78	-1.51395	95.0658	-0.112617
6.271	74.3713	12.7788	-1.51534	95.057	-0.112721
6.27933	74.4518	12.7776	-1.5167	95.048	-0.112822
6.28767	74.5412	12.7764	-1.51807	95.0392	-0.112924
6.296	74.6249	12.7752	-1.51943	95.0303	-0.113025
6.30433	74.7084	12.774	-1.5208	95.0215	-0.113127
6.31267	74.7919	12.7728	-1.52221	95.0124	-0.113232
6.321	74.875	12.7716	-1.52362	95.0033	-0.113337
6.32933	74.9596	12.7704	-1.52503	94.9942	-0.113441
6.33767	75.0426	12.7691	-1.52639	94.985	-0.113543
6.346	75.1222	12.7679	-1.52776	94.9761	-0.113645
6.35433	75.2091	12.7667	-1.52913	94.9671	-0.113746
6.36267	75.2917	12.7655	-1.5305	94.9579	-0.113848
6.371	75.376	12.7643	-1.5319	94.9487	-0.113953
6.37933	75.4627	12.763	-1.53329	94.9395	-0.114056
6.38767	75.546	12.7618	-1.53464	94.9302	-0.114157
6.396	75.6271	12.7606	-1.53603	94.9211	-0.11426
6.40433	75.7148	12.7593	-1.53739	94.9119	-0.114361
6.41267	75.7958	12.7581	-1.53873	94.9027	-0.114461
6.421	75.8777	12.7568	-1.5401	94.8934	-0.114563
6.42933	75.9623	12.7556	-1.54145	94.8842	-0.114663
6.43767	76.0404	12.7543	-1.54287	94.8749	-0.114769
6.446	76.124	12.7531	-1.54427	94.8656	-0.114873
6.45433	76.2073	12.7518	-1.54565	94.8563	-0.114975
6.46267	76.2912	12.7506	-1.54707	94.8471	-0.115081
6.471	76.3772	12.7493	-1.5485	94.8378	-0.115187
6.47933	76.4565	12.7481	-1.54991	94.8286	-0.115292
6.48767	76.5391	12.7469	-1.55133	94.8193	-0.115398
6.496	76.6222	12.7456	-1.55277	94.81	-0.115505
6.50433	76.7035	12.7444	-1.55421	94.8006	-0.115612
6.51267	76.7866	12.7431	-1.55563	94.7914	-0.115718
6.521	76.8724	12.7418	-1.55704	94.7819	-0.115823
6.52933	76.9591	12.7406	-1.55843	94.7726	-0.115926
6.53767	77.0365	12.7393	-1.55983	94.763	-0.11603
6.546	77.1245	12.738	-1.56123	94.7536	-0.116134
6.55433	77.2086	12.7368	-1.56263	94.7441	-0.116238
6.56267	77.2892	12.7355	-1.56401	94.7346	-0.116341
6.571	77.3748	12.7342	-1.56543	94.725	-0.116447
6.57933	77.4544	12.7329	-1.56683	94.7154	-0.116551
6.58767	77.5382	12.7316	-1.56822	94.7057	-0.116654
6.596	77.6189	12.7303	-1.56964	94.696	-0.11676
6.60433	77.7014	12.729	-1.57104	94.6864	-0.116864
6.61267	77.7895	12.7277	-1.57248	94.6768	-0.116971
6.621	77.8674	12.7264	-1.5739	94.6673	-0.117077
6.62933	77.9481	12.7251	-1.57534	94.6576	-0.117184
6.63767	78.0329	12.7238	-1.57676	94.648	-0.117289
6.646	78.1175	12.7226	-1.57816	94.6385	-0.117393
6.65433	78.1969	12.7212	-1.57951	94.6288	-0.117494
6.66267	78.2779	12.72	-1.58093	94.6194	-0.117599
6.671	78.3657	12.7187	-1.58236	94.61	-0.117706
6.67933	78.4467	12.7174	-1.58375	94.6004	-0.117809
6.68767	78.5287	12.7162	-1.58517	94.5909	-0.117915
6.696	78.605	12.7149	-1.58655	94.5812	-0.118018
6.70433	78.6948	12.7136	-1.58795	94.5716	-0.118122
6.71267	78.7806	12.7123	-1.58933	94.562	-0.118224
6.721	78.8574	12.711	-1.59075	94.5524	-0.11833
6.72933	78.9426	12.7097	-1.59217	94.5426	-0.118436
6.73767	79.0235	12.7083	-1.59357	94.5328	-0.11854
6.746	79.1063	12.707	-1.59491	94.5229	-0.11864
6.75433	79.1872	12.7057	-1.59626	94.5128	-0.11874
6.76267	79.2719	12.7043	-1.59763	94.5031	-0.118842
6.771	79.3543	12.703	-1.59897	94.4933	-0.118941
6.77933	79.4356	12.7017	-1.60034	94.4834	-0.119044
6.78767	79.5241	12.7004	-1.60169	94.4734	-0.119144
6.796	79.6078	12.699	-1.60308	94.4636	-0.119247
6.80433	79.6868	12.6977	-1.60442	94.4538	-0.119347
6.81267	79.7717	12.6964	-1.60577	94.4439	-0.119448
6.821	79.8558	12.6951	-1.60714	94.434	-0.119549
6.82933	79.9367	12.6937	-1.60854	94.4241	-0.119653
6.83767	80.0154	12.6924	-1.60991	94.414	-0.119755
6.846	80.0971	12.691	-1.6113	94.4041	-0.119858
6.85433	80.184	12.6897	-1.61268	94.3941	-0.119961
6.86267	80.2655	12.6883	-1.61405	94.384	-0.120063
6.871	80.3536	12.687	-1.61543	94.3741	-0.120166
6.87933	80.4299	12.6856	-1.61675	94.3639	-0.120264
6.88767	80.5138	12.6843	-1.61809	94.3536	-0.120364
6.896	80.594	12.6829	-1.61944	94.3437	-0.120464
6.90433	80.6706	12.6816	-1.62078	94.3336	-0.120564
6.91267	80.7577	12.6802	-1.62212	94.3236	-0.120663
6.921	80.8403	12.6789	-1.62344	94.3138	-0.120762
6.92933	80.922	12.6776	-1.62478	94.3037	-0.120862
6.93767	81.0101	12.6762	-1.62612	94.2936	-0.120961
6.946	81.0897	12.6748	-1.62743	94.2836	-0.121058
6.95433	81.1717	12.6735	-1.62872	94.2733	-0.121155
6.96267	81.2571	12.6721	-1.63003	94.2633	-0.121252
6.971	81.3386	12.6708	-1.63135	94.2534	-0.12135
6.97933	81.419	12.6694	-1.63267	94.2432	-0.121449
6.98767	81.5007	12.6681	-1.63399	94.2332	-0.121546
6.996	81.5837	12.6667	-1.63525	94.2232	-0.121641
7.00433	81.6693	12.6654	-1.63654	94.2132	-0.121737
7.01267	81.7489	12.664	-1.63779	94.2031	-0.121829
7.021	81.8315	12.6627	-1.63901	94.1931	-0.12192
7.02933	81.9105	12.6613	-1.64026	94.1831	-0.122013
7.03767	81.9956	12.66	-1.64151	94.1731	-0.122106
7.046	82.0802	12.6586	-1.64272	94.163	-0.122196
7.05433	82.163	12.6573	-1.64391	94.1531	-0.122285
7.06267	82.2434	12.6559	-1.64506	94.1429	-0.12237
7.071	82.3265	12.6546	-1.64624	94.1327	-0.122458
7.07933	82.4081	12.6532	-1.64743	94.1226	-0.122546
7.08767	82.4906	12.6519	-1.64855	94.1126	-0.12263
7.096	82.5761	12.6505	-1.64968	94.1026	-0.122713
7.10433	82.6565	12.6492	-1.65083	94.0927	-0.122799
7.11267	82.7338	12.6478	-1.65192	94.0827	-0.12288
7.121	82.8149	12.6465	-1.65301	94.0728	-0.122961
7.12933	82.9027	12.6452	-1.65411	94.0629	-0.123043
7.13767	82.9825	12.6438	-1.65519	94.0528	-0.123124
7.146	83.0648	12.6425	-1.65628	94.0427	-0.123205
7.15433	83.1506	12.6411	-1.65734	94.0326	-0.123284
7.16267	83.2344	12.6397	-1.6584	94.0223	-0.123362
7.171	83.3097	12.6384	-1.65947	94.0122	-0.123442
7.17933	83.3977	12.637	-1.6605	94.002	-0.123519
7.18767	83.4815	12.6356	-1.66148	93.9917	-0.123592
7.196	83.5597	12.6342	-1.66246	93.9816	-0.123665
7.20433	83.6425	12.6329	-1.66342	93.9717	-0.123736
7.21267	83.7263	12.6316	-1.66437	93.9616	-0.123807
7.221	83.8013	12.6302	-1.66528	93.9516	-0.123874
7.22933	83.8915	12.6289	-1.66616	93.9419	-0.12394
7.23767	83.9722	12.6276	-1.667	93.9321	-0.124002
7.246	84.0534	12.6263	-1.66782	93.9222	-0.124063
7.25433	84.1309	12.625	-1.66863	93.9126	-0.124124
7.26267	84.2204	12.6237	-1.66942	93.9028	-0.124182
7.271	84.2989	12.6224	-1.67022	93.8932	-0.124242
7.27933	84.3826	12.6211	-1.671	93.8835	-0.1243
7.28767	84.464	12.6197	-1.67174	93.8738	-0.124355
7.296	84.5476	12.6184	-1.67247	93.8639	-0.124409
7.30433	84.6307	12.6171	-1.67316	93.8541	-0.12446
7.31267	84.7131	12.6158	-1.67383	93.8445	-0.12451
7.321	84.7921	12.6145	-1.67449	93.835	-0.124559
7.32933	84.8774	12.6132	-1.67512	93.8253	-0.124606
7.33767	84.9601	12.6119	-1.67568	93.8156	-0.124648
7.346	85.0431	12.6106	-1.67617	93.8058	-0.124685
7.35433	85.1267	12.6093	-1.67666	93.7962	-0.12472
7.36267	85.2085	12.608	-1.67713	93.7864	-0.124756
7.371	85.2905	12.6067	-1.67754	93.7769	-0.124786
7.37933	85.367	12.6055	-1.67791	93.7675	-0.124813
7.38767	85.4595	12.6042	-1.67829	93.7579	-0.124842
7.396	85.5386	12.6029	-1.67862	93.7483	-0.124866
7.40433	85.6163	12.6016	-1.67891	93.7387	-0.124888
7.41267	85.7028	12.6003	-1.67918	93.7293	-0.124908
7.421	85.7868	12.5991	-1.67944	93.7199	-0.124928
7.42933	85.8726	12.5978	-1.67969	93.7107	-0.124946
7.43767	85.9529	12.5966	-1.67988	93.7013	-0.124961
7.446	86.0366	12.5953	-1.68003	93.6922	-0.124971
7.45433	86.1227	12.5941	-1.68015	93.6828	-0.12498
7.46267	86.1985	12.5929	-1.68022	93.6738	-0.124985
7.471	86.2867	12.5917	-1.68021	93.665	-0.124985
7.47933	86.3659	12.5905	-1.6802	93.656	-0.124984
7.48767	86.4561	12.5893	-1.68017	93.647	-0.124982
7.496	86.5354	12.5881	-1.68007	93.6383	-0.124974
7.50433	86.6218	12.5869	-1.67993	93.6295	-0.124964
7.51267	86.6977	12.5857	-1.6798	93.6208	-0.124954
7.521	86.7838	12.5845	-1.67963	93.6118	-0.124942
7.52933	86.8657	12.5833	-1.67939	93.6028	-0.124924
7.53767	86.9506	12.5822	-1.67916	93.5942	-0.124906
7.546	87.0319	12.581	-1.67889	93.5853	-0.124887
7.55433	87.1189	12.5798	-1.6786	93.5765	-0.124865
7.56267	87.2037	12.5786	-1.67822	93.5679	-0.124836
7.571	87.2806	12.5775	-1.6778	93.5592	-0.124806
7.57933	87.3642	12.5763	-1.67735	93.5506	-0.124772
7.58767	87.4533	12.5751	-1.67688	93.5419	-0.124737
7.596	87.5371	12.574	-1.67637	93.5332	-0.124699
7.60433	87.6233	12.5728	-1.6758	93.5248	-0.124657
7.61267	87.7067	12.5717	-1.67522	93.5166	-0.124614
7.621	87.7837	12.5706	-1.6746	93.5082	-0.124567
7.62933	87.8664	12.5695	-1.67393	93.4998	-0.124518
7.63767	87.9515	12.5684	-1.67323	93.4916	-0.124466
7.646	88.033	12.5673	-1.67254	93.4833	-0.124414
7.65433	88.1163	12.5662	-1.67178	93.475	-0.124357
7.66267	88.2	12.5651	-1.671	93.4669	-0.1243
7.671	88.2849	12.564	-1.67018	93.4589	-0.124239
7.67933	88.3689	12.5629	-1.66927	93.4512	-0.124171
7.68767	88.4562	12.5619	-1.66832	93.4434	-0.1241
7.696	88.542	12.5608	-1.66738	93.4355	-0.12403
7.70433	88.6217	12.5598	-1.66636	93.4277	-0.123955
7.71267	88.7112	12.5587	-1.66531	93.4198	-0.123877
7.721	88.7894	12.5577	-1.66424	93.412	-0.123797
7.72933	88.8784	12.5567	-1.66311	93.4045	-0.123713
7.73767	88.9613	12.5556	-1.66195	93.3967	-0.123627
7.746	89.0443	12.5546	-1.66075	93.3889	-0.123537
7.75433	89.1274	12.5536	-1.6595	93.3814	-0.123444
7.76267	89.2137	12.5525	-1.65825	93.3738	-0.123351
7.771	89.3004	12.5515	-1.65695	93.3661	-0.123255
7.77933	89.3788	12.5505	-1.65558	93.3587	-0.123153
7.78767	89.4637	12.5495	-1.6542	93.3513	-0.12305
7.796	89.5518	12.5486	-1.65279	93.3441	-0.122945
7.80433	89.6324	12.5476	-1.65135	93.3368	-0.122838
7.81267	89.7194	12.5466	-1.64989	93.3295	-0.12273
7.821	89.8091	12.5456	-1.64838	93.3225	-0.122617
7.82933	89.8892	12.5447	-1.64681	93.3157	-0.122501
7.83767	89.9787	12.5438	-1.64525	93.3087	-0.122384
7.846	90.0583	12.5429	-1.64364	93.3019	-0.122265
7.85433	90.1398	12.542	-1.64201	93.2952	-0.122143
7.86267	90.2306	12.541	-1.64036	93.2883	-0.122021
7.871	90.3157	12.5401	-1.63868	93.2816	-0.121896
7.87933	90.4012	12.5392	-1.63697	93.2748	-0.121769
7.88767	90.4852	12.5383	-1.6352	93.2682	-0.121637
7.896	90.5673	12.5375	-1.6334	93.2616	-0.121503
7.90433	90.654	12.5366	-1.63157	93.2551	-0.121367
7.91267	90.736	12.5357	-1.62975	93.2485	-0.121231
7.921	90.821	12.5348	-1.6279	93.2421	-0.121093
7.92933	90.9074	12.534	-1.626	93.2356	-0.120953
7.93767	90.9913	12.5331	-1.62409	93.2291	-0.12081
7.946	91.0723	12.5322	-1.62211	93.2229	-0.120663
7.95433	91.1611	12.5314	-1.62016	93.2166	-0.120518
7.96267	91.2461	12.5306	-1.61813	93.2103	-0.120367
7.971	91.3283	12.5297	-1.6161	93.2041	-0.120216
7.97933	91.415	12.5289	-1.61404	93.1979	-0.120063
7.98767	91.4997	12.5281	-1.61198	93.1916	-0.11991
7.996	91.5842	12.5272	-1.6099	93.1855	-0.119754
8.00433	91.6716	12.5264	-1.60775	93.1794	-0.119595
8.01267	91.7558	12.5256	-1.60564	93.1735	-0.119438
8.021	91.8444	12.5248	-1.60354	93.1676	-0.119282
8.02933	91.9266	12.524	-1.60142	93.1615	-0.119124
8.03767	92.017	12.5232	-1.59925	93.1554	-0.118963
8.046	92.102	12.5224	-1.59709	93.1495	-0.118802
8.05433	92.1835	12.5216	-1.59495	93.1436	-0.118642
8.06267	92.2677	12.5208	-1.59282	93.1376	-0.118484
8.071	92.3578	12.52	-1.59066	93.1318	-0.118323
8.07933	92.4479	12.5192	-1.58848	93.126	-0.118161
8.08767	92.5296	12.5184	-1.58628	93.12	-0.117998
8.096	92.6151	12.5176	-1.58403	93.114	-0.11783
8.10433	92.6991	12.5168	-1.58179	93.1082	-0.117664
8.11267	92.7799	12.5161	-1.57956	93.1024	-0.117498
8.121	92.864	12.5153	-1.57731	93.0969	-0.11733
8.12933	92.9521	12.5146	-1.57505	93.0914	-0.117162
8.13767	93.0414	12.5138	-1.57278	93.0856	-0.116994
8.146	93.1243	12.513	-1.57049	93.0801	-0.116823
8.15433	93.2063	12.5123	-1.56822	93.0744	-0.116654
8.16267	93.2887	12.5115	-1.56593	93.0688	-0.116484
8.171	93.3798	12.5108	-1.56366	93.0632	-0.116315
8.17933	93.4641	12.5101	-1.56141	93.0579	-0.116148
8.18767	93.5471	12.5093	-1.55913	93.0524	-0.115978
8.196	93.6343	12.5086	-1.55688	93.047	-0.11581
8.20433	93.7217	12.5079	-1.55459	93.0415	-0.11564
8.21267	93.8091	12.5071	-1.55234	93.0359	-0.115473
8.221	93.8927	12.5064	-1.55008	93.0306	-0.115305
8.22933	93.9782	12.5057	-1.54781	93.0253	-0.115136
8.23767	94.0617	12.505	-1.54555	93.0199	-0.114968
8.246	94.153	12.5043	-1.54328	93.0146	-0.114799
8.25433	94.2344	12.5036	-1.541	93.0094	-0.11463
8.26267	94.322	12.5029	-1.53874	93.0043	-0.114461
8.271	94.4058	12.5022	-1.53649	92.9991	-0.114294
8.27933	94.4903	12.5014	-1.53417	92.9936	-0.114121
8.28767	94.5812	12.5007	-1.5319	92.9882	-0.113952
8.296	94.6633	12.5	-1.52963	92.983	-0.113784
8.30433	94.748	12.4993	-1.52738	92.9778	-0.113616
8.31267	94.8319	12.4986	-1.5251	92.9724	-0.113447
8.321	94.9203	12.4979	-1.52284	92.9675	-0.113279
8.32933	95.0055	12.4972	-1.52059	92.9625	-0.113111
8.33767	95.0895	12.4965	-1.51836	92.9571	-0.112945
8.346	95.1784	12.4958	-1.51611	92.9519	-0.112778
8.35433	95.2645	12.4951	-1.51386	92.9468	-0.11261
8.36267	95.3462	12.4945	-1.51166	92.9418	-0.112447
8.371	95.433	12.4938	-1.50942	92.9367	-0.11228
8.37933	95.5234	12.4931	-1.50717	92.9317	-0.112113
8.38767	95.6077	12.4924	-1.50493	92.9264	-0.111946
8.396	95.6884	12.4917	-1.50273	92.9215	-0.111783
8.40433	95.7757	12.491	-1.5005	92.9163	-0.111617
8.41267	95.8598	12.4904	-1.4983	92.9113	-0.111453
8.421	95.9469	12.4897	-1.49608	92.9062	-0.111288
8.42933	96.0313	12.489	-1.49389	92.901	-0.111125
8.43767	96.119	12.4883	-1.49167	92.896	-0.11096
8.446	96.2044	12.4876	-1.48945	92.891	-0.110795
8.45433	96.29	12.487	-1.48724	92.8861	-0.110631
8.46267	96.3724	12.4863	-1.48504	92.8812	-0.110467
8.471	96.457	12.4857	-1.48284	92.8763	-0.110303
8.47933	96.5431	12.485	-1.4807	92.8715	-0.110144
8.48767	96.6291	12.4843	-1.47856	92.8666	-0.109985
8.496	96.7153	12.4837	-1.47643	92.8615	-0.109826
8.50433	96.7991	12.483	-1.4743	92.8567	-0.109668
8.51267	96.8841	12.4824	-1.47213	92.8519	-0.109506
8.521	96.9762	12.4817	-1.47	92.847	-0.109348
8.52933	97.0564	12.481	-1.46785	92.8419	-0.109188
8.53767	97.1394	12.4804	-1.46578	92.8371	-0.109034
8.546	97.2274	12.4797	-1.4637	92.8324	-0.108879
8.55433	97.3159	12.4791	-1.46161	92.8274	-0.108724
8.56267	97.4024	12.4785	-1.45948	92.8227	-0.108565
8.571	97.4897	12.4778	-1.45738	92.8178	-0.108409
8.57933	97.5739	12.4772	-1.45529	92.8132	-0.108253
8.58767	97.6564	12.4765	-1.45321	92.8084	-0.108099
8.596	97.7417	12.4759	-1.45116	92.8037	-0.107946
8.60433	97.8267	12.4753	-1.4491	92.7992	-0.107793
8.61267	97.9108	12.4747	-1.4471	92.7947	-0.107645
8.621	97.9979	12.4741	-1.44507	92.7901	-0.107494
8.62933	98.0905	12.4734	-1.44304	92.7855	-0.107343
8.63767	98.1718	12.4728	-1.44103	92.7808	-0.107193
8.646	98.258	12.4722	-1.43902	92.7763	-0.107043
8.65433	98.3449	12.4716	-1.437	92.7717	-0.106893
8.66267	98.4311	12.471	-1.43499	92.7671	-0.106743
8.671	98.514	12.4704	-1.433	92.7627	-0.106596
8.67933	98.6013	12.4698	-1.43099	92.758	-0.106446
8.68767	98.6864	12.4692	-1.429	92.7535	-0.106298
8.696	98.7717	12.4685	-1.42699	92.749	-0.106148
8.70433	98.8607	12.4679	-1.42498	92.7442	-0.105999
8.71267	98.9447	12.4673	-1.42299	92.7395	-0.105851
8.721	99.0303	12.4667	-1.42099	92.7351	-0.105702
8.72933	99.1128	12.4661	-1.41903	92.7307	-0.105557
8.73767	99.1991	12.4655	-1.41708	92.7261	-0.105412
8.746	99.2854	12.4649	-1.41511	92.7218	-0.105265
8.75433	99.3697	12.4643	-1.41315	92.7173	-0.105119
8.76267	99.4544	12.4637	-1.41125	92.713	-0.104978
8.771	99.5407	12.4631	-1.40939	92.7085	-0.104839
8.77933	99.6242	12.4625	-1.40754	92.7041	-0.104702
8.78767	99.7125	12.4619	-1.40566	92.6996	-0.104562
8.796	99.8006	12.4613	-1.40379	92.6951	-0.104423
8.80433	99.8796	12.4607	-1.40192	92.6906	-0.104284
8.81267	99.9664	12.4601	-1.40003	92.6863	-0.104143
8.821	100.053	12.4595	-1.39817	92.6819	-0.104005
8.82933	100.138	12.4589	-1.39636	92.6774	-0.10387
8.83767	100.225	12.4583	-1.39453	92.6729	-0.103734
8.846	100.309	12.4577	-1.39267	92.6686	-0.103595
8.85433	100.393	12.4572	-1.39078	92.6643	-0.103455
8.86267	100.481	12.4566	-1.38891	92.6598	-0.103316
8.871	100.566	12.456	-1.38708	92.6555	-0.10318
8.87933	100.646	12.4554	-1.38525	92.6515	-0.103043
8.88767	100.736	12.4549	-1.38345	92.6473	-0.10291
8.896	100.815	12.4543	-1.38168	92.6429	-0.102778
8.90433	100.907	12.4537	-1.3799	92.6386	-0.102646
8.91267	100.986	12.4531	-1.37811	92.6343	-0.102512
8.921	101.078	12.4526	-1.37632	92.6301	-0.10238
8.92933	101.162	12.452	-1.37456	92.6258	-0.102249
8.93767	101.244	12.4514	-1.3728	92.6215	-0.102118
8.946	101.332	12.4508	-1.37105	92.6172	-0.101988
8.95433	101.414	12.4503	-1.36934	92.6132	-0.10186
8.96267	101.498	12.4497	-1.36763	92.6088	-0.101733
8.971	101.584	12.4491	-1.36589	92.6044	-0.101604
8.97933	101.666	12.4485	-1.36417	92.6	-0.101476
8.98767	101.754	12.4479	-1.36243	92.5957	-0.101347
8.996	101.841	12.4474	-1.36071	92.5914	-0.101218
9.00433	101.927	12.4468	-1.35899	92.5872	-0.101091
9.01267	102.014	12.4462	-1.35732	92.5829	-0.100966
9.021	102.099	12.4456	-1.35565	92.5786	-0.100842
9.02933	102.182	12.4451	-1.35399	92.5745	-0.100718
9.03767	102.27	12.4445	-1.35231	92.57	-0.100594
9.046	102.353	12.4439	-1.35062	92.5657	-0.100468
9.05433	102.441	12.4433	-1.34898	92.5615	-0.100346
9.06267	102.522	12.4428	-1.34733	92.5576	-0.100223
9.071	102.607	12.4422	-1.3457	92.5533	-0.100102
9.07933	102.695	12.4417	-1.34406	92.5491	-0.09998
9.08767	102.784	12.4411	-1.34248	92.5448	-0.099862
9.096	102.868	12.4405	-1.34086	92.5406	-0.0997415
9.10433	102.955	12.44	-1.33926	92.5365	-0.0996223
9.11267	103.036	12.4394	-1.33766	92.5324	-0.0995039
9.121	103.122	12.4389	-1.33606	92.5284	-0.0993849
9.12933	103.207	12.4384	-1.33448	92.5245	-0.0992671
9.13767	103.29	12.4378	-1.33287	92.5203	-0.0991472
9.146	103.379	12.4373	-1.33132	92.5163	-0.0990318
9.15433	103.468	12.4367	-1.32975	92.5123	-0.098915
9.16267	103.552	12.4362	-1.32816	92.5083	-0.0987971
9.171	103.634	12.4357	-1.32659	92.5044	-0.0986805
9.17933	103.72	12.4351	-1.32503	92.5004	-0.0985645
9.18767	103.806	12.4346	-1.32347	92.4965	-0.0984482
9.196	103.89	12.4341	-1.32192	92.4926	-0.0983326
9.20433	103.975	12.4335	-1.32039	92.4886	-0.0982187
9.21267	104.055	12.433	-1.31889	92.4847	-0.0981072
9.221	104.146	12.4325	-1.31737	92.4809	-0.0979942
9.22933	104.233	12.432	-1.31582	92.4769	-0.0978791
9.23767	104.318	12.4314	-1.31429	92.4728	-0.0977653
9.246	104.405	12.4309	-1.31278	92.4688	-0.0976531
9.25433	104.493	12.4304	-1.31125	92.4649	-0.0975392
9.26267	104.577	12.4298	-1.30973	92.4608	-0.0974264
9.271	104.659	12.4292	-1.30826	92.4567	-0.0973167
9.27933	104.743	12.4287	-1.30674	92.4524	-0.0972034
9.28767	104.83	12.4281	-1.30523	92.4484	-0.0970912
9.296	104.911	12.4276	-1.30372	92.4442	-0.0969793
9.30433	104.999	12.427	-1.30227	92.4402	-0.0968709
9.31267	105.083	12.4265	-1.30081	92.4362	-0.0967628
9.321	105.168	12.426	-1.29937	92.4322	-0.0966555
9.32933	105.254	12.4254	-1.29793	92.4283	-0.0965485
9.33767	105.34	12.4249	-1.29651	92.4241	-0.0964429
9.346	105.42	12.4243	-1.2951	92.42	-0.096338
9.35433	105.507	12.4238	-1.29367	92.416	-0.0962318
9.36267	105.594	12.4233	-1.29227	92.4121	-0.0961273
9.371	105.678	12.4227	-1.29088	92.4081	-0.096024
9.37933	105.765	12.4222	-1.28946	92.4043	-0.0959185
9.38767	105.847	12.4217	-1.28803	92.4004	-0.0958122
9.396	105.933	12.4212	-1.28663	92.3965	-0.0957081
9.40433	106.017	12.4207	-1.28522	92.393	-0.0956029
9.41267	106.106	12.4202	-1.28382	92.3892	-0.0954984
9.421	106.192	12.4197	-1.28245	92.3854	-0.0953964
9.42933	106.275	12.4191	-1.28105	92.3815	-0.0952928
9.43767	106.359	12.4186	-1.27967	92.3777	-0.0951897
9.446	106.442	12.4181	-1.27833	92.3739	-0.0950901
9.45433	106.534	12.4176	-1.27694	92.3703	-0.0949867
9.46267	106.619	12.4171	-1.27558	92.3665	-0.0948859
9.471	106.706	12.4166	-1.27427	92.3627	-0.0947884
9.47933	106.79	12.4161	-1.27295	92.3587	-0.0946904
9.48767	106.871	12.4155	-1.27168	92.3545	-0.0945954
9.496	106.956	12.415	-1.27037	92.3506	-0.0944981
9.50433	107.045	12.4145	-1.26902	92.3467	-0.0943977
9.51267	107.13	12.4139	-1.26772	92.3428	-0.0943008
9.521	107.213	12.4135	-1.2664	92.3392	-0.0942026
9.52933	107.299	12.413	-1.26503	92.3354	-0.0941009
9.53767	107.384	12.4124	-1.26372	92.3316	-0.0940039
9.546	107.464	12.4119	-1.26246	92.3276	-0.0939098
9.55433	107.555	12.4114	-1.26118	92.3238	-0.0938145
9.56267	107.637	12.4109	-1.25988	92.3202	-0.0937175
9.571	107.722	12.4104	-1.25855	92.3168	-0.093619
9.57933	107.811	12.4099	-1.25726	92.3131	-0.0935233
9.58767	107.89	12.4094	-1.25597	92.3094	-0.0934272
9.596	107.976	12.4089	-1.25467	92.3056	-0.0933307
9.60433	108.06	12.4084	-1.2534	92.3018	-0.0932355
9.61267	108.15	12.4079	-1.25215	92.298	-0.0931427
9.621	108.237	12.4074	-1.2509	92.2943	-0.09305
9.62933	108.316	12.4069	-1.24962	92.2906	-0.0929544
9.63767	108.402	12.4064	-1.24836	92.2867	-0.0928612
9.646	108.489	12.4059	-1.24712	92.2832	-0.0927688
9.65433	108.573	12.4054	-1.24592	92.2794	-0.0926799
9.66267	108.655	12.4049	-1.24472	92.2756	-0.0925903
9.671	108.741	12.4044	-1.24353	92.2718	-0.0925016
9.67933	108.833	12.4039	-1.24234	92.268	-0.0924133
9.68767	108.914	12.4034	-1.24116	92.2643	-0.0923254
9.696	109.001	12.4029	-1.24	92.2605	-0.0922389
9.70433	109.085	12.4024	-1.2388	92.2569	-0.0921502
9.71267	109.166	12.4019	-1.23763	92.2533	-0.0920628
9.721	109.255	12.4014	-1.23642	92.2498	-0.0919725
9.72933	109.336	12.4009	-1.23521	92.246	-0.0918828
9.73767	109.421	12.4004	-1.23401	92.2422	-0.0917932
9.746	109.509	12.4	-1.23281	92.2388	-0.0917044
9.75433	109.589	12.3995	-1.23164	92.2353	-0.0916172
9.76267	109.678	12.399	-1.23046	92.232	-0.0915293
9.771	109.759	12.3986	-1.22931	92.2286	-0.0914443
9.77933	109.844	12.3981	-1.22817	92.2251	-0.0913594
9.78767	109.934	12.3976	-1.22703	92.2216	-0.0912741
9.796	110.017	12.3972	-1.22588	92.218	-0.091189
9.80433	110.098	12.3966	-1.22476	92.2142	-0.0911052
9.81267	110.185	12.3961	-1.22366	92.2103	-0.0910235
9.821	110.273	12.3956	-1.2225	92.2067	-0.0909375
9.82933	110.357	12.3951	-1.22141	92.203	-0.0908561
9.83767	110.441	12.3946	-1.22031	92.1991	-0.0907742
9.846	110.528	12.3941	-1.21919	92.1955	-0.0906911
9.85433	110.611	12.3936	-1.21803	92.1918	-0.0906047
9.86267	110.695	12.3931	-1.21687	92.1881	-0.0905185
9.871	110.778	12.3927	-1.21574	92.1847	-0.0904342
9.87933	110.867	12.3922	-1.21463	92.1812	-0.0903522
9.88767	110.953	12.3918	-1.21354	92.1778	-0.0902709
9.896	111.037	12.3913	-1.21245	92.1742	-0.0901895
9.90433	111.117	12.3908	-1.2114	92.1705	-0.0901114
9.91267	111.206	12.3903	-1.21028	92.1668	-0.0900285
9.921	111.286	12.3898	-1.20918	92.1635	-0.0899466
9.92933	111.372	12.3894	-1.20811	92.1603	-0.0898667
9.93767	111.459	12.3889	-1.20705	92.1567	-0.0897883
9.946	111.545	12.3885	-1.20598	92.1533	-0.0897084
9.95433	111.628	12.388	-1.20494	92.1497	-0.0896308
9.96267	111.712	12.3875	-1.20386	92.1463	-0.089551
9.971	111.798	12.3871	-1.20282	92.1429	-0.0894737
9.97933	111.883	12.3866	-1.20174	92.1397	-0.0893932
9.98767	111.967	12.3862	-1.20067	92.1362	-0.0893133
9.996	112.052	12.3857	-1.1996	92.1329	-0.0892342
10.0043	112.138	12.3852	-1.19857	92.1294	-0.0891573
10.0127	112.219	12.3848	-1.19753	92.1258	-0.0890802
10.021	112.308	12.3843	-1.19651	92.1222	-0.0890041
10.0293	112.389	12.3838	-1.1955	92.1185	-0.0889289
10.0377	112.475	12.3833	-1.19446	92.115	-0.0888516
10.046	112.557	12.3829	-1.19344	92.1116	-0.0887753
10.0543	112.643	12.3824	-1.19236	92.1081	-0.0886954
10.0627	112.731	12.3819	-1.19133	92.1049	-0.0886186
10.071	112.81	12.3815	-1.19032	92.1015	-0.0885439
10.0793	112.897	12.381	-1.18935	92.0981	-0.0884717
10.0877	112.984	12.3806	-1.18835	92.0948	-0.0883969
10.096	113.068	12.3802	-1.18735	92.0915	-0.088323
10.1043	113.149	12.3797	-1.18636	92.0881	-0.0882488
10.1127	113.236	12.3793	-1.18537	92.0848	-0.0881756
10.121	113.318	12.3788	-1.1844	92.0813	-0.0881032
10.1293	113.4	12.3783	-1.18347	92.078	-0.0880339
10.1377	113.491	12.3779	-1.18255	92.0746	-0.0879654
10.146	113.577	12.3774	-1.18162	92.071	-0.0878964
10.1543	113.656	12.3769	-1.18063	92.0676	-0.0878227
10.1627	113.741	12.3765	-1.17964	92.0642	-0.0877495
10.171	113.82	12.376	-1.17869	92.0607	-0.0876787
10.1793	113.905	12.3756	-1.17776	92.0573	-0.0876094
10.1877	113.993	12.3751	-1.17681	92.054	-0.0875386
10.196	114.076	12.3747	-1.17588	92.0507	-0.0874692
10.2043	114.166	12.3742	-1.17494	92.0474	-0.0873992
10.2127	114.251	12.3738	-1.17394	92.0441	-0.0873252
10.221	114.335	12.3733	-1.17298	92.0408	-0.087254
10.2293	114.42	12.3729	-1.17204	92.0375	-0.0871837
10.2377	114.504	12.3725	-1.17116	92.0342	-0.0871187
10.246	114.59	12.372	-1.17026	92.0306	-0.0870513
10.2543	114.678	12.3715	-1.16932	92.027	-0.0869815
10.2627	114.755	12.371	-1.16836	92.0235	-0.0869104
10.271	114.841	12.3705	-1.16745	92.02	-0.086842
10.2793	114.925	12.3701	-1.16648	92.0166	-0.0867705
10.2877	115.006	12.3696	-1.16555	92.0131	-0.0867008
10.296	115.094	12.3692	-1.16463	92.0097	-0.0866328
10.3043	115.177	12.3687	-1.16374	92.0064	-0.0865666
10.3127	115.262	12.3683	-1.16283	92.0031	-0.086499
10.321	115.345	12.3679	-1.16189	92.0001	-0.0864288
10.3293	115.427	12.3675	-1.16097	91.9972	-0.0863602
10.3377	115.516	12.3671	-1.16008	91.9942	-0.0862939
10.346	115.598	12.3667	-1.15925	91.9913	-0.0862326
10.3543	115.686	12.3663	-1.1584	91.9884	-0.0861692
10.3627	115.77	12.3659	-1.15756	91.9852	-0.0861068
10.371	115.852	12.3655	-1.15669	91.9823	-0.0860421
10.3793	115.938	12.365	-1.15585	91.979	-0.0859795
10.3877	116.022	12.3646	-1.15496	91.9759	-0.0859135
10.396	116.108	12.3642	-1.15409	91.9725	-0.0858484
10.4043	116.198	12.3637	-1.15322	91.9692	-0.0857839
10.4127	116.281	12.3633	-1.15237	91.9658	-0.0857208
10.421	116.358	12.3628	-1.15152	91.9627	-0.0856572
10.4293	116.444	12.3624	-1.15063	91.9594	-0.0855912
10.4377	116.526	12.362	-1.14975	91.9562	-0.085526
10.446	116.61	12.3615	-1.14891	91.9527	-0.085463
10.4543	116.699	12.361	-1.14808	91.9492	-0.0854013
10.4627	116.78	12.3606	-1.14724	91.9458	-0.0853389
10.471	116.867	12.3601	-1.1464	91.9425	-0.0852768
10.4793	116.949	12.3597	-1.14556	91.9393	-0.0852141
10.4877	117.034	12.3592	-1.14471	91.936	-0.085151
10.496	117.119	12.3588	-1.14387	91.9328	-0.0850883
10.5043	117.204	12.3583	-1.14303	91.9292	-0.085026
10.5127	117.286	12.3579	-1.14219	91.9257	-0.0849631
10.521	117.374	12.3574	-1.14136	91.9225	-0.0849018
10.5293	117.457	12.357	-1.14052	91.9194	-0.0848394
10.5377	117.534	12.3566	-1.13972	91.9164	-0.0847796
10.546	117.617	12.3562	-1.13892	91.9133	-0.0847205
10.5543	117.706	12.3558	-1.13811	91.91	-0.0846597
10.5627	117.793	12.3553	-1.1373	91.9069	-0.0845999
10.571	117.881	12.3549	-1.1365	91.9039	-0.0845403
10.5793	117.966	12.3545	-1.13571	91.9007	-0.0844814
10.5877	118.045	12.3541	-1.13491	91.8978	-0.0844222
10.596	118.128	12.3537	-1.1341	91.8947	-0.0843618
10.6043	118.214	12.3533	-1.1333	91.8915	-0.0843021
10.6127	118.299	12.3528	-1.1325	91.8882	-0.0842425
10.621	118.382	12.3524	-1.13169	91.885	-0.0841823
10.6293	118.463	12.352	-1.13087	91.8818	-0.0841212
10.6377	118.548	12.3516	-1.13008	91.8788	-0.0840628
10.646	118.633	12.3511	-1.1293	91.8757	-0.0840047
10.6543	118.719	12.3507	-1.12854	91.8726	-0.0839483
10.6627	118.805	12.3503	-1.12776	91.8696	-0.0838903
10.671	118.888	12.3499	-1.12696	91.8667	-0.0838306
10.6793	118.971	12.3496	-1.1262	91.8639	-0.0837737
10.6877	119.055	12.3491	-1.12543	91.8609	-0.0837166
10.696	119.145	12.3488	-1.12469	91.858	-0.0836616
10.7043	119.234	12.3484	-1.12393	91.855	-0.0836051
10.7127	119.308	12.348	-1.12315	91.852	-0.0835471
10.721	119.388	12.3475	-1.12237	91.8489	-0.0834889
10.7293	119.475	12.3471	-1.12161	91.8456	-0.0834327
10.7377	119.561	12.3467	-1.12087	91.8423	-0.0833774
10.746	119.65	12.3462	-1.12011	91.8391	-0.0833213
10.7543	119.733	12.3458	-1.1194	91.8359	-0.0832682
10.7627	119.813	12.3454	-1.11867	91.8327	-0.0832139
10.771	119.9	12.3449	-1.11794	91.8295	-0.0831595
10.7793	119.985	12.3445	-1.1172	91.8265	-0.0831045
10.7877	120.067	12.3441	-1.11646	91.8233	-0.0830493
10.796	120.156	12.3437	-1.11573	91.8202	-0.0829954
10.8043	120.231	12.3433	-1.11506	91.8172	-0.0829453
10.8127	120.325	12.3429	-1.11438	91.8143	-0.0828949
10.821	120.409	12.3425	-1.11367	91.8112	-0.0828423
10.8293	120.486	12.3421	-1.11299	91.8082	-0.0827912
10.8377	120.57	12.3417	-1.11229	91.8053	-0.0827395
10.846	120.657	12.3413	-1.11159	91.8021	-0.0826873
10.8543	120.74	12.3408	-1.11093	91.799	-0.0826378
10.8627	120.824	12.3404	-1.11024	91.7961	-0.082587
10.871	120.907	12.34	-1.10959	91.793	-0.0825381
10.8793	120.992	12.3396	-1.10891	91.7898	-0.0824879
10.8877	121.078	12.3392	-1.10817	91.7866	-0.0824331
10.896	121.158	12.3388	-1.10747	91.7836	-0.0823804
10.9043	121.238	12.3384	-1.10679	91.7806	-0.0823305
10.9127	121.326	12.338	-1.10611	91.7776	-0.0822793
10.921	121.412	12.3376	-1.10538	91.7746	-0.0822254
10.9293	121.495	12.3371	-1.10471	91.7716	-0.0821752
10.9377	121.578	12.3368	-1.104	91.7688	-0.0821227
10.946	121.666	12.3364	-1.1033	91.7658	-0.0820702
10.9543	121.744	12.336	-1.10261	91.7629	-0.0820192
10.9627	121.832	12.3356	-1.10194	91.7601	-0.0819691
10.971	121.916	12.3352	-1.10131	91.7574	-0.0819222
10.9793	121.997	12.3349	-1.10064	91.7546	-0.0818729
10.9877	122.081	12.3345	-1.09996	91.7518	-0.0818219
10.996	122.166	12.3341	-1.09929	91.7487	-0.0817723
11.0043	122.254	12.3337	-1.0987	91.7456	-0.0817282
11.0127	122.337	12.3333	-1.09804	91.7427	-0.0816794
11.021	122.419	12.3328	-1.09738	91.7395	-0.0816303
11.0293	122.506	12.3324	-1.09673	91.7365	-0.0815818
11.0377	122.591	12.332	-1.0961	91.7333	-0.0815345
11.046	122.67	12.3316	-1.09545	91.73	-0.0814864
11.0543	122.759	12.3311	-1.09475	91.7268	-0.0814349
11.0627	122.843	12.3307	-1.0941	91.7236	-0.0813864
11.071	122.925	12.3303	-1.09349	91.7206	-0.0813406
11.0793	123.008	12.3299	-1.09287	91.7178	-0.0812944
11.0877	123.098	12.3295	-1.09221	91.715	-0.0812458
11.096	123.179	12.3292	-1.09158	91.7123	-0.0811984
11.1043	123.263	12.3288	-1.09094	91.7093	-0.0811509
11.1127	123.348	12.3284	-1.0903	91.7064	-0.0811037
11.121	123.429	12.328	-1.08962	91.7035	-0.0810531
11.1293	123.514	12.3276	-1.08899	91.7005	-0.0810057
11.1377	123.598	12.3272	-1.08841	91.6974	-0.0809626
11.146	123.681	12.3268	-1.08775	91.6945	-0.0809141
11.1543	123.766	12.3264	-1.08712	91.6916	-0.0808666
11.1627	123.851	12.326	-1.08648	91.6885	-0.080819
11.171	123.939	12.3256	-1.08582	91.6855	-0.0807704
11.1793	124.02	12.3252	-1.0852	91.6824	-0.0807242
11.1877	124.105	12.3248	-1.08458	91.6797	-0.0806783
11.196	124.189	12.3244	-1.08398	91.6768	-0.0806331
11.2043	124.277	12.324	-1.08339	91.6739	-0.0805894
11.2127	124.359	12.3237	-1.08278	91.6712	-0.0805442
11.221	124.44	12.3233	-1.08215	91.6685	-0.0804976
11.2293	124.524	12.3229	-1.08158	91.6657	-0.080455
11.2377	124.61	12.3225	-1.08096	91.6629	-0.080409
11.246	124.693	12.3222	-1.08037	91.6602	-0.0803648
11.2543	124.779	12.3218	-1.07976	91.6575	-0.0803194
11.2627	124.862	12.3214	-1.07914	91.6547	-0.0802736
11.271	124.946	12.3211	-1.07853	91.6519	-0.0802279
11.2793	125.026	12.3207	-1.07793	91.6491	-0.0801832
11.2877	125.115	12.3203	-1.07732	91.6463	-0.0801382
11.296	125.199	12.3199	-1.07674	91.6435	-0.0800945
11.3043	125.284	12.3195	-1.07614	91.6406	-0.0800499
11.3127	125.364	12.3192	-1.07549	91.6378	-0.080002
11.321	125.452	12.3188	-1.07489	91.635	-0.0799575
11.3293	125.531	12.3184	-1.07431	91.6321	-0.0799137
11.3377	125.616	12.318	-1.07376	91.6292	-0.0798734
11.346	125.703	12.3176	-1.07321	91.626	-0.0798324
11.3543	125.786	12.3172	-1.07261	91.6231	-0.0797872
11.3627	125.87	12.3168	-1.07203	91.6203	-0.0797446
11.371	125.957	12.3164	-1.07145	91.6174	-0.0797011
11.3793	126.041	12.3161	-1.07086	91.6146	-0.0796571
11.3877	126.12	12.3157	-1.0703	91.6118	-0.0796159
11.396	126.207	12.3153	-1.06977	91.6088	-0.0795766
11.4043	126.289	12.3149	-1.06918	91.6058	-0.0795321
11.4127	126.374	12.3145	-1.06857	91.6029	-0.0794868
11.421	126.458	12.3141	-1.06796	91.5999	-0.0794418
11.4293	126.543	12.3137	-1.06735	91.5972	-0.079396
11.4377	126.628	12.3133	-1.0668	91.5942	-0.0793555
11.446	126.711	12.3129	-1.06622	91.5911	-0.079312
11.4543	126.794	12.3125	-1.06565	91.5882	-0.0792696
11.4627	126.876	12.3121	-1.06508	91.5856	-0.0792275
11.471	126.962	12.3118	-1.0645	91.5829	-0.0791843
11.4793	127.045	12.3114	-1.06392	91.5802	-0.0791409
11.4877	127.128	12.311	-1.06338	91.5775	-0.0791011
11.496	127.213	12.3107	-1.06284	91.5746	-0.0790611
11.5043	127.3	12.3103	-1.06228	91.5718	-0.079019
11.5127	127.382	12.3099	-1.0617	91.569	-0.0789761
11.521	127.464	12.3096	-1.06115	91.5667	-0.0789348
11.5293	127.552	12.3093	-1.06059	91.5641	-0.0788938
11.5377	127.635	12.3089	-1.06003	91.5616	-0.0788515
11.546	127.72	12.3085	-1.05948	91.5587	-0.0788112
11.5543	127.8	12.3081	-1.05893	91.5557	-0.0787701
11.5627	127.886	12.3078	-1.05839	91.5529	-0.0787296
11.571	127.971	12.3074	-1.05779	91.5502	-0.0786849
11.5793	128.056	12.307	-1.0572	91.5474	-0.0786414
11.5877	128.137	12.3066	-1.05664	91.5446	-0.0785996
11.596	128.223	12.3063	-1.0561	91.5417	-0.0785598
11.6043	128.308	12.3058	-1.05555	91.5387	-0.0785185
11.6127	128.392	12.3055	-1.05499	91.5359	-0.0784769
11.621	128.472	12.3051	-1.05445	91.5331	-0.0784367
11.6293	128.559	12.3047	-1.05386	91.5304	-0.078393
11.6377	128.643	12.3044	-1.05329	91.5278	-0.0783507
11.646	128.729	12.304	-1.05273	91.5252	-0.0783089
11.6543	128.811	12.3037	-1.05221	91.5226	-0.0782704
11.6627	128.89	12.3033	-1.05169	91.5201	-0.0782312
11.671	128.975	12.303	-1.05118	91.5176	-0.0781933
11.6793	129.063	12.3027	-1.05067	91.5152	-0.0781553
11.6877	129.144	12.3023	-1.05012	91.5127	-0.0781149
11.696	129.229	12.302	-1.0496	91.51	-0.0780757
11.7043	129.314	12.3016	-1.04907	91.5075	-0.0780365
11.7127	129.4	12.3013	-1.04856	91.5048	-0.0779984
11.721	129.48	12.3009	-1.04803	91.502	-0.0779592
11.7293	129.566	12.3005	-1.04751	91.499	-0.0779206
11.7377	129.647	12.3001	-1.04696	91.4961	-0.0778799
11.746	129.73	12.2997	-1.0464	91.4931	-0.0778377
11.7543	129.812	12.2993	-1.04583	91.4903	-0.0777957
11.7627	129.895	12.299	-1.04529	91.4876	-0.0777551
11.771	129.982	12.2986	-1.04476	91.4848	-0.0777158
11.7793	130.066	12.2982	-1.04421	91.4822	-0.077675
11.7877	130.154	12.2979	-1.04367	91.4794	-0.0776345
11.796	130.239	12.2975	-1.04314	91.4768	-0.0775952
11.8043	130.323	12.2972	-1.0426	91.4743	-0.0775552
11.8127	130.404	12.2968	-1.04203	91.4717	-0.0775125
11.821	130.486	12.2965	-1.0415	91.4694	-0.0774736
11.8293	130.57	12.2962	-1.04101	91.467	-0.0774367
11.8377	130.663	12.2958	-1.04047	91.4641	-0.0773971
11.846	130.739	12.2954	-1.03992	91.4613	-0.0773563
11.8543	130.827	12.2951	-1.03937	91.4587	-0.0773153
11.8627	130.911	12.2947	-1.03882	91.456	-0.0772738
11.871	130.991	12.2944	-1.03828	91.4534	-0.0772341
11.8793	131.081	12.2941	-1.03771	91.451	-0.0771919
11.8877	131.161	12.2937	-1.03715	91.4485	-0.0771501
11.896	131.248	12.2934	-1.03662	91.4461	-0.0771103
11.9043	131.327	12.293	-1.03606	91.4433	-0.0770688
11.9127	131.416	12.2927	-1.03552	91.4407	-0.0770283
11.921	131.499	12.2924	-1.03501	91.4384	-0.0769907
11.9293	131.58	12.292	-1.03451	91.4359	-0.0769531
11.9377	131.668	12.2917	-1.03399	91.4333	-0.0769149
11.946	131.75	12.2913	-1.03347	91.4308	-0.0768759
11.9543	131.83	12.291	-1.03289	91.4283	-0.0768333
11.9627	131.919	12.2906	-1.03235	91.4254	-0.0767924
11.971	132.004	12.2903	-1.03184	91.4228	-0.0767551
11.9793	132.079	12.2899	-1.03134	91.4202	-0.0767178
11.9877	132.167	12.2896	-1.03086	91.4176	-0.0766816
11.996	132.256	12.2892	-1.03034	91.415	-0.076643
12.0043	132.335	12.2889	-1.02978	91.4123	-0.0766015
12.0127	132.419	12.2885	-1.02922	91.4099	-0.07656
12.021	132.504	12.2882	-1.02867	91.4074	-0.0765189
12.0293	132.586	12.2878	-1.02814	91.4047	-0.0764795
12.0377	132.67	12.2875	-1.02765	91.4021	-0.0764432
12.046	132.757	12.2872	-1.02716	91.3997	-0.0764068
12.0543	132.837	12.2868	-1.02664	91.3974	-0.076368
12.0627	132.925	12.2865	-1.02608	91.3951	-0.0763262
12.071	133.007	12.2862	-1.02552	91.3928	-0.0762847
12.0793	133.087	12.2859	-1.02499	91.3902	-0.0762453
12.0877	133.176	12.2856	-1.02446	91.3878	-0.076206
12.096	133.257	12.2852	-1.02393	91.3852	-0.0761667
12.1043	133.34	12.2849	-1.02342	91.3829	-0.0761282
12.1127	133.425	12.2846	-1.02291	91.3807	-0.0760904
12.121	133.51	12.2843	-1.02239	91.3784	-0.0760515
12.1293	133.591	12.2839	-1.02186	91.3758	-0.0760125
12.1377	133.676	12.2836	-1.0213	91.3731	-0.0759706
12.146	133.761	12.2832	-1.02079	91.3704	-0.0759327
12.1543	133.843	12.2829	-1.02025	91.3679	-0.0758929
12.1627	133.93	12.2825	-1.01972	91.3654	-0.0758532
12.171	134.006	12.2822	-1.01919	91.3628	-0.0758142
12.1793	134.097	12.2819	-1.01867	91.3607	-0.075775
12.1877	134.18	12.2816	-1.01814	91.3581	-0.0757355
12.196	134.267	12.2812	-1.01759	91.3553	-0.0756951
12.2043	134.347	12.2808	-1.01705	91.3527	-0.0756548
12.2127	134.432	12.2805	-1.01653	91.3502	-0.0756164
12.221	134.517	12.2802	-1.01605	91.3477	-0.0755801
12.2293	134.599	12.2798	-1.01555	91.3452	-0.0755433
12.2377	134.685	12.2795	-1.01509	91.3428	-0.0755088
12.246	134.771	12.2792	-1.01458	91.3405	-0.0754709
12.2543	134.851	12.2789	-1.01408	91.3381	-0.0754334
12.2627	134.936	12.2785	-1.01357	91.3353	-0.075396
12.271	135.021	12.2781	-1.01306	91.3326	-0.0753578
12.2793	135.104	12.2778	-1.01255	91.3303	-0.0753201
12.2877	135.186	12.2775	-1.01205	91.3277	-0.075283
12.296	135.274	12.2772	-1.01155	91.3253	-0.0752454
12.3043	135.361	12.2768	-1.01105	91.3227	-0.0752084
12.3127	135.437	12.2765	-1.01055	91.3204	-0.0751712
12.321	135.525	12.2761	-1.01003	91.3178	-0.0751328
12.3293	135.609	12.2758	-1.00954	91.3152	-0.0750957
12.3377	135.69	12.2755	-1.00903	91.3127	-0.0750581
12.346	135.778	12.2752	-1.00851	91.3104	-0.0750195
12.3543	135.854	12.2749	-1.00805	91.3082	-0.074985
12.3627	135.94	12.2745	-1.00759	91.3059	-0.0749509
12.371	136.03	12.2743	-1.00708	91.3038	-0.0749133
12.3793	136.107	12.2739	-1.00654	91.3013	-0.074873
12.3877	136.191	12.2736	-1.00601	91.2991	-0.0748336
12.396	136.274	12.2733	-1.0055	91.2967	-0.0747951
12.4043	136.363	12.273	-1.00497	91.2944	-0.0747562
12.4127	136.443	12.2727	-1.00443	91.2923	-0.0747162
12.421	136.527	12.2724	-1.00393	91.2899	-0.074679
12.4293	136.61	12.272	-1.00348	91.2873	-0.0746454
12.4377	136.695	12.2717	-1.00296	91.2847	-0.0746065
12.446	136.78	12.2714	-1.00244	91.2822	-0.0745682
12.4543	136.862	12.271	-1.00199	91.2796	-0.0745346
12.4627	136.947	12.2707	-1.00152	91.2772	-0.0744997
12.471	137.033	12.2704	-1.00103	91.2749	-0.0744629
12.4793	137.118	12.2701	-1.00055	91.2728	-0.0744273
12.4877	137.202	12.2698	-1.00007	91.2705	-0.0743919
12.496	137.284	12.2695	-0.999593	91.268	-0.0743561
12.5043	137.365	12.2692	-0.999102	91.266	-0.0743196
12.5127	137.45	12.2689	-0.998576	91.2639	-0.0742804
12.521	137.536	12.2686	-0.998055	91.2617	-0.0742417
12.5293	137.619	12.2683	-0.997541	91.2594	-0.0742035
12.5377	137.704	12.268	-0.997027	91.2571	-0.0741652
12.546	137.788	12.2677	-0.996548	91.2549	-0.0741296
12.5543	137.868	12.2673	-0.996076	91.2523	-0.0740945
12.5627	137.957	12.267	-0.995588	91.2497	-0.0740582
12.571	138.044	12.2667	-0.995077	91.2473	-0.0740202
12.5793	138.128	12.2663	-0.994612	91.2448	-0.0739856
12.5877	138.212	12.266	-0.994129	91.2421	-0.0739497
12.596	138.297	12.2657	-0.993649	91.2398	-0.073914
12.6043	138.378	12.2654	-0.99319	91.2376	-0.0738798
12.6127	138.457	12.265	-0.992728	91.2352	-0.0738455
12.621	138.545	12.2647	-0.992234	91.2327	-0.0738087
12.6293	138.628	12.2644	-0.991737	91.2301	-0.0737717
12.6377	138.714	12.264	-0.991234	91.2278	-0.0737343
12.646	138.791	12.2637	-0.990713	91.2255	-0.0736955
12.6543	138.881	12.2634	-0.990222	91.2232	-0.0736591
12.6627	138.965	12.2631	-0.989731	91.2208	-0.0736225
12.671	139.05	12.2628	-0.989243	91.2185	-0.0735862
12.6793	139.131	12.2625	-0.988777	91.2161	-0.0735515
12.6877	139.221	12.2622	-0.988332	91.2137	-0.0735185
12.696	139.3	12.2619	-0.987845	91.2115	-0.0734822
12.7043	139.384	12.2616	-0.98738	91.2097	-0.0734477
12.7127	139.465	12.2613	-0.986909	91.2076	-0.0734126
12.721	139.546	12.261	-0.986452	91.2054	-0.0733786
12.7293	139.634	12.2607	-0.985994	91.2031	-0.0733445
12.7377	139.722	12.2604	-0.98555	91.2008	-0.0733115
12.746	139.801	12.2601	-0.985095	91.1986	-0.0732777
12.7543	139.889	12.2598	-0.984621	91.1965	-0.0732424
12.7627	139.967	12.2595	-0.984137	91.1941	-0.0732064
12.771	140.051	12.2592	-0.983648	91.1918	-0.07317
12.7793	140.138	12.2589	-0.983186	91.1895	-0.0731356
12.7877	140.225	12.2586	-0.982724	91.1872	-0.0731013
12.796	140.307	12.2583	-0.982289	91.1849	-0.0730689
12.8043	140.392	12.258	-0.981843	91.1828	-0.0730358
12.8127	140.475	12.2577	-0.981402	91.1809	-0.073003
12.821	140.561	12.2575	-0.980939	91.1788	-0.0729685
12.8293	140.646	12.2572	-0.980466	91.1766	-0.0729333
12.8377	140.729	12.2568	-0.980033	91.1742	-0.0729011
12.846	140.811	12.2565	-0.979578	91.172	-0.0728673
12.8543	140.897	12.2562	-0.979131	91.1697	-0.072834
12.8627	140.979	12.2559	-0.978663	91.1673	-0.0727992
12.871	141.067	12.2556	-0.97819	91.1651	-0.072764
12.8793	141.148	12.2553	-0.977726	91.1628	-0.0727295
12.8877	141.23	12.255	-0.977272	91.1607	-0.0726957
12.896	141.317	12.2547	-0.976823	91.1581	-0.0726624
12.9043	141.403	12.2544	-0.976371	91.1559	-0.0726287
12.9127	141.484	12.2541	-0.975904	91.1537	-0.0725939
12.921	141.565	12.2538	-0.975441	91.1516	-0.0725596
12.9293	141.652	12.2535	-0.975002	91.1496	-0.0725269
12.9377	141.734	12.2532	-0.974544	91.1475	-0.0724928
12.946	141.814	12.253	-0.974086	91.1453	-0.0724588
12.9543	141.904	12.2527	-0.973645	91.1432	-0.072426
12.9627	141.987	12.2524	-0.973199	91.1412	-0.0723927
12.971	142.069	12.2521	-0.972759	91.1388	-0.0723601
12.9793	142.149	12.2518	-0.972302	91.1367	-0.0723261
12.9877	142.237	12.2515	-0.971855	91.1344	-0.0722928
12.996	142.318	12.2512	-0.971457	91.1322	-0.0722632
13.0043	142.405	12.2509	-0.971024	91.1299	-0.072231
13.0127	142.487	12.2506	-0.970579	91.1277	-0.0721978
13.021	142.571	12.2503	-0.97014	91.1255	-0.0721652
13.0293	142.656	12.25	-0.969731	91.1234	-0.0721348
13.0377	142.739	12.2497	-0.969284	91.1212	-0.0721015
13.046	142.824	12.2494	-0.968825	91.1189	-0.0720674
13.0543	142.912	12.2491	-0.968366	91.1169	-0.0720332
13.0627	142.993	12.2489	-0.967932	91.1149	-0.0720009
13.071	143.077	12.2486	-0.967478	91.1129	-0.0719672
13.0793	143.164	12.2483	-0.967012	91.111	-0.0719326
13.0877	143.245	12.2481	-0.966554	91.1089	-0.0718985
13.096	143.323	12.2478	-0.966113	91.1068	-0.0718657
13.1043	143.416	12.2475	-0.965656	91.1047	-0.0718317
13.1127	143.498	12.2472	-0.965193	91.1025	-0.0717972
13.121	143.58	12.2469	-0.964721	91.1003	-0.0717621
13.1293	143.664	12.2466	-0.964305	91.0981	-0.0717312
13.1377	143.745	12.2463	-0.963895	91.0958	-0.0717007
13.146	143.832	12.246	-0.963456	91.0936	-0.071668
13.1543	143.915	12.2457	-0.963051	91.0913	-0.0716379
13.1627	143.999	12.2454	-0.962596	91.0893	-0.0716041
13.171	144.082	12.2451	-0.962191	91.0871	-0.0715739
13.1793	144.165	12.2448	-0.961762	91.0848	-0.071542
13.1877	144.249	12.2446	-0.961345	91.0829	-0.0715109
13.196	144.331	12.2443	-0.960918	91.0808	-0.0714792
13.2043	144.42	12.244	-0.960533	91.0788	-0.0714506
13.2127	144.496	12.2438	-0.960096	91.0769	-0.0714181
13.221	144.582	12.2435	-0.959644	91.075	-0.0713844
13.2293	144.666	12.2432	-0.9592	91.0728	-0.0713514
13.2377	144.751	12.2429	-0.958765	91.0707	-0.0713191
13.246	144.832	12.2426	-0.958329	91.0686	-0.0712867
13.2543	144.923	12.2424	-0.957858	91.0666	-0.0712516
13.2627	145.003	12.2421	-0.957434	91.0645	-0.0712201
13.271	145.088	12.2418	-0.957016	91.0623	-0.071189
13.2793	145.167	12.2415	-0.956623	91.0601	-0.0711598
13.2877	145.254	12.2412	-0.956222	91.0579	-0.0711299
13.296	145.336	12.2409	-0.955809	91.0556	-0.0710992
13.3043	145.423	12.2406	-0.955405	91.0535	-0.0710691
13.3127	145.505	12.2403	-0.955006	91.0515	-0.0710395
13.321	145.591	12.24	-0.954579	91.0492	-0.0710077
13.3293	145.675	12.2398	-0.954181	91.0472	-0.0709781
13.3377	145.76	12.2395	-0.953772	91.0451	-0.0709476
13.346	145.843	12.2392	-0.953351	91.0428	-0.0709163
13.3543	145.926	12.2389	-0.952918	91.0408	-0.0708841
13.3627	146.011	12.2386	-0.952483	91.0389	-0.0708518
13.371	146.101	12.2384	-0.952057	91.037	-0.0708201
13.3793	146.18	12.2381	-0.951616	91.035	-0.0707873
13.3877	146.262	12.2378	-0.951184	91.0328	-0.0707552
13.396	146.344	12.2375	-0.95076	91.0306	-0.0707236
13.4043	146.429	12.2372	-0.95035	91.0284	-0.0706931
13.4127	146.512	12.2369	-0.94993	91.0262	-0.0706618
13.421	146.601	12.2367	-0.949512	91.0242	-0.0706308
13.4293	146.681	12.2364	-0.949077	91.0222	-0.0705984
13.4377	146.763	12.2362	-0.948681	91.0203	-0.0705689
13.446	146.853	12.2359	-0.948283	91.0181	-0.0705393
13.4543	146.936	12.2355	-0.947839	91.0158	-0.0705063
13.4627	147.021	12.2353	-0.947397	91.0138	-0.0704734
13.471	147.106	12.235	-0.946974	91.0117	-0.070442
13.4793	147.185	12.2347	-0.946555	91.0098	-0.0704108
13.4877	147.268	12.2345	-0.946125	91.0079	-0.0703788
13.496	147.355	12.2342	-0.945718	91.006	-0.0703486
13.5043	147.437	12.2339	-0.945319	91.0039	-0.0703189
13.5127	147.52	12.2337	-0.944901	91.0019	-0.0702878
13.521	147.607	12.2334	-0.944463	90.9997	-0.0702552
13.5293	147.693	12.2331	-0.94405	90.9977	-0.0702244
13.5377	147.775	12.2328	-0.943626	90.9958	-0.0701929
13.546	147.857	12.2326	-0.94325	90.994	-0.070165
13.5543	147.941	12.2323	-0.942834	90.992	-0.070134
13.5627	148.027	12.2321	-0.942404	90.9899	-0.070102
13.571	148.109	12.2318	-0.941995	90.9879	-0.0700716
13.5793	148.192	12.2315	-0.941571	90.9859	-0.0700401
13.5877	148.276	12.2313	-0.941149	90.9839	-0.0700087
13.596	148.361	12.231	-0.940759	90.982	-0.0699797
13.6043	148.448	12.2307	-0.940325	90.98	-0.0699474
13.6127	148.526	12.2304	-0.939883	90.9778	-0.0699145
13.621	148.611	12.2302	-0.939483	90.9757	-0.0698847
13.6293	148.696	12.2299	-0.939062	90.9735	-0.0698535
13.6377	148.781	12.2296	-0.938676	90.9716	-0.0698247
13.646	148.865	12.2293	-0.938279	90.9696	-0.0697952
13.6543	148.947	12.2291	-0.937898	90.9676	-0.0697669
13.6627	149.031	12.2288	-0.937498	90.9658	-0.0697371
13.671	149.116	12.2286	-0.937082	90.9638	-0.0697061
13.6793	149.2	12.2283	-0.93665	90.9616	-0.069674
13.6877	149.282	12.228	-0.936265	90.9596	-0.0696454
13.696	149.371	12.2277	-0.935856	90.9577	-0.069615
13.7043	149.453	12.2275	-0.935447	90.9559	-0.0695845
13.7127	149.539	12.2272	-0.935059	90.9539	-0.0695556
13.721	149.619	12.227	-0.934639	90.9519	-0.0695244
13.7293	149.708	12.2267	-0.934254	90.9497	-0.0694958
13.7377	149.786	12.2264	-0.933822	90.9478	-0.0694636
13.746	149.874	12.2261	-0.933407	90.9457	-0.0694328
13.7543	149.956	12.2258	-0.932986	90.9436	-0.0694015
13.7627	150.042	12.2256	-0.932561	90.9417	-0.0693698
13.771	150.124	12.2254	-0.932143	90.94	-0.0693387
13.7793	150.209	12.2251	-0.93173	90.9381	-0.069308
13.7877	150.294	12.2248	-0.931313	90.936	-0.069277
13.796	150.376	12.2245	-0.930889	90.9339	-0.0692455
13.8043	150.461	12.2242	-0.930483	90.9317	-0.0692153
13.8127	150.544	12.224	-0.930041	90.9297	-0.0691824
13.821	150.627	12.2237	-0.929638	90.9275	-0.0691524
13.8293	150.713	12.2234	-0.929252	90.9257	-0.0691237
13.8377	150.796	12.2232	-0.928868	90.9238	-0.0690951
13.846	150.883	12.2229	-0.928508	90.922	-0.0690684
13.8543	150.965	12.2227	-0.928108	90.9202	-0.0690386
13.8627	151.05	12.2225	-0.927722	90.9185	-0.0690099
13.871	151.134	12.2222	-0.927319	90.9167	-0.0689799
13.8793	151.22	12.222	-0.926923	90.9152	-0.0689505
13.8877	151.301	12.2218	-0.926516	90.9136	-0.0689202
13.896	151.387	12.2216	-0.926141	90.9119	-0.0688923
13.9043	151.467	12.2213	-0.925727	90.9102	-0.0688615
13.9127	151.551	12.2211	-0.925333	90.9083	-0.0688322
13.921	151.635	12.2208	-0.924944	90.9063	-0.0688032
13.9293	151.72	12.2205	-0.924524	90.9043	-0.068772
13.9377	151.802	12.2203	-0.92413	90.9021	-0.0687427
13.946	151.888	12.22	-0.923719	90.9001	-0.0687121
13.9543	151.974	12.2197	-0.923323	90.8982	-0.0686826
13.9627	152.058	12.2195	-0.922908	90.8961	-0.0686518
13.971	152.136	12.2192	-0.922504	90.8943	-0.0686217
13.9793	152.223	12.2189	-0.922092	90.8922	-0.0685911
13.9877	152.305	12.2187	-0.921697	90.8903	-0.0685617
13.996	152.389	12.2184	-0.921264	90.8885	-0.0685295
14.0043	152.477	12.2182	-0.920861	90.8868	-0.0684995
14.0127	152.56	12.218	-0.920452	90.885	-0.0684691
14.021	152.643	12.2177	-0.92005	90.8832	-0.0684392
14.0293	152.726	12.2175	-0.919651	90.8813	-0.0684095
14.0377	152.809	12.2172	-0.919255	90.8795	-0.0683801
14.046	152.894	12.217	-0.918871	90.8778	-0.0683515
14.0543	152.978	12.2168	-0.918471	90.8761	-0.0683217
14.0627	153.058	12.2166	-0.918055	90.8746	-0.0682908
14.071	153.146	12.2163	-0.917646	90.8727	-0.0682604
14.0793	153.228	12.2161	-0.91726	90.8711	-0.0682317
14.0877	153.313	12.2158	-0.916819	90.8692	-0.0681989
14.096	153.396	12.2156	-0.916407	90.8675	-0.0681682
14.1043	153.475	12.2154	-0.916012	90.8659	-0.0681388
14.1127	153.56	12.2152	-0.915633	90.8643	-0.0681106
14.121	153.643	12.2149	-0.915262	90.8625	-0.068083
14.1293	153.729	12.2147	-0.914894	90.8605	-0.0680557
14.1377	153.814	12.2144	-0.914532	90.8586	-0.0680287
14.146	153.904	12.2141	-0.91418	90.8566	-0.0680025
14.1543	153.988	12.2139	-0.913826	90.8546	-0.0679762
14.1627	154.067	12.2136	-0.913478	90.8529	-0.0679503
14.171	154.15	12.2134	-0.913154	90.8509	-0.0679262
14.1793	154.232	12.2131	-0.912796	90.8491	-0.0678996
14.1877	154.315	12.2129	-0.912429	90.8472	-0.0678723
14.196	154.4	12.2126	-0.912049	90.8451	-0.067844
14.2043	154.484	12.2123	-0.911661	90.8432	-0.0678152
14.2127	154.568	12.2121	-0.911277	90.8413	-0.0677866
14.221	154.65	12.2118	-0.910867	90.8395	-0.0677561
14.2293	154.736	12.2116	-0.910456	90.8378	-0.0677256
14.2377	154.819	12.2114	-0.910049	90.8363	-0.0676952
14.246	154.903	12.2112	-0.909623	90.8345	-0.0676636
14.2543	154.99	12.2109	-0.909202	90.8328	-0.0676322
14.2627	155.07	12.2107	-0.90882	90.831	-0.0676038
14.271	155.155	12.2105	-0.908419	90.8292	-0.067574
14.2793	155.234	12.2102	-0.908007	90.8274	-0.0675434
14.2877	155.318	12.21	-0.907616	90.8256	-0.0675143
14.296	155.4	12.2097	-0.907195	90.8238	-0.067483
14.3043	155.487	12.2095	-0.906798	90.8221	-0.0674534
14.3127	155.569	12.2093	-0.906418	90.8203	-0.0674252
14.321	155.656	12.209	-0.906033	90.8183	-0.0673966
14.3293	155.739	12.2087	-0.905687	90.8164	-0.0673708
14.3377	155.822	12.2085	-0.905341	90.8147	-0.067345
14.346	155.905	12.2082	-0.904935	90.8128	-0.0673148
14.3543	155.989	12.208	-0.904537	90.8111	-0.0672852
14.3627	156.069	12.2078	-0.90415	90.8094	-0.0672565
14.371	156.155	12.2075	-0.903762	90.8074	-0.0672276
14.3793	156.243	12.2073	-0.90339	90.8055	-0.0671999
14.3877	156.322	12.207	-0.903022	90.8036	-0.0671725
14.396	156.409	12.2068	-0.902636	90.8018	-0.0671438
14.4043	156.489	12.2065	-0.902251	90.8	-0.0671152
14.4127	156.575	12.2063	-0.901849	90.7984	-0.0670853
14.421	156.66	12.2061	-0.901448	90.7967	-0.0670555
14.4293	156.747	12.2059	-0.90107	90.795	-0.0670273
14.4377	156.825	12.2056	-0.900702	90.793	-0.067
14.446	156.912	12.2054	-0.900331	90.7913	-0.0669724
14.4543	156.998	12.2051	-0.899951	90.7896	-0.0669441
14.4627	157.072	12.2049	-0.899573	90.7881	-0.066916
14.471	157.158	12.2048	-0.899182	90.7867	-0.0668869
14.4793	157.246	12.2045	-0.898839	90.785	-0.0668614
14.4877	157.33	12.2043	-0.898466	90.7834	-0.0668336
14.496	157.411	12.2041	-0.898093	90.7815	-0.0668059
14.5043	157.498	12.2038	-0.897696	90.7797	-0.0667764
14.5127	157.582	12.2036	-0.897318	90.7779	-0.0667482
14.521	157.666	12.2033	-0.896946	90.7762	-0.0667206
14.5293	157.748	12.2031	-0.896586	90.7744	-0.0666938
14.5377	157.832	12.2029	-0.896211	90.7728	-0.0666659
14.546	157.918	12.2026	-0.895834	90.771	-0.0666378
14.5543	157.999	12.2024	-0.895458	90.7692	-0.0666099
14.5627	158.086	12.2022	-0.895056	90.7675	-0.06658
14.571	158.168	12.2019	-0.894683	90.7657	-0.0665522
14.5793	158.255	12.2017	-0.894273	90.764	-0.0665217
14.5877	158.338	12.2015	-0.893913	90.7625	-0.066495
14.596	158.422	12.2013	-0.893565	90.7609	-0.0664691
14.6043	158.504	12.201	-0.893173	90.7591	-0.0664399
14.6127	158.589	12.2008	-0.892784	90.7576	-0.066411
14.621	158.671	12.2006	-0.892402	90.7556	-0.0663826
14.6293	158.755	12.2004	-0.892028	90.7541	-0.0663547
14.6377	158.841	12.2001	-0.891673	90.7523	-0.0663283
14.646	158.922	12.1999	-0.891303	90.7505	-0.0663008
14.6543	159.006	12.1996	-0.890947	90.7486	-0.0662743
14.6627	159.087	12.1994	-0.890591	90.7469	-0.0662478
14.671	159.175	12.1991	-0.890225	90.7451	-0.0662206
14.6793	159.259	12.1989	-0.889872	90.7432	-0.0661943
14.6877	159.347	12.1987	-0.889515	90.7415	-0.0661678
14.696	159.431	12.1984	-0.889149	90.7396	-0.0661406
14.7043	159.513	12.1982	-0.888801	90.7379	-0.0661147
14.7127	159.596	12.1979	-0.888438	90.736	-0.0660877
14.721	159.681	12.1977	-0.88805	90.7341	-0.0660588
14.7293	159.765	12.1975	-0.887672	90.7326	-0.0660307
14.7377	159.848	12.1972	-0.887328	90.7309	-0.0660051
14.746	159.931	12.197	-0.886998	90.7292	-0.0659806
14.7543	160.013	12.1968	-0.886638	90.7274	-0.0659538
14.7627	160.098	12.1966	-0.886269	90.7257	-0.0659263
14.771	160.183	12.1963	-0.885928	90.724	-0.065901
14.7793	160.268	12.1961	-0.885605	90.7225	-0.065877
14.7877	160.35	12.1959	-0.88528	90.721	-0.0658528
14.796	160.438	12.1957	-0.884946	90.7195	-0.0658279
14.8043	160.522	12.1955	-0.884611	90.7179	-0.065803
14.8127	160.599	12.1953	-0.884294	90.7162	-0.0657794
14.821	160.685	12.1951	-0.883927	90.7147	-0.0657521
14.8293	160.765	12.1949	-0.883569	90.7132	-0.0657255
14.8377	160.853	12.1947	-0.883215	90.7117	-0.0656992
14.846	160.935	12.1945	-0.882882	90.7102	-0.0656744
14.8543	161.021	12.1942	-0.882563	90.7085	-0.0656507
14.8627	161.106	12.194	-0.882211	90.7071	-0.0656245
14.871	161.189	12.1938	-0.881872	90.7054	-0.0655993
14.8793	161.27	12.1936	-0.881517	90.7036	-0.0655728
14.8877	161.355	12.1934	-0.881197	90.7022	-0.0655491
14.896	161.441	12.1932	-0.880837	90.7007	-0.0655223
14.9043	161.522	12.193	-0.880493	90.6991	-0.0654967
14.9127	161.607	12.1928	-0.880153	90.6975	-0.0654714
14.921	161.695	12.1926	-0.879832	90.696	-0.0654475
14.9293	161.775	12.1923	-0.87948	90.6943	-0.0654213
14.9377	161.861	12.1921	-0.87913	90.6928	-0.0653953
14.946	161.943	12.1919	-0.878789	90.691	-0.0653699
14.9543	162.031	12.1917	-0.878434	90.6894	-0.0653436
14.9627	162.106	12.1915	-0.878095	90.6879	-0.0653183
14.971	162.198	12.1912	-0.877716	90.686	-0.0652902
14.9793	162.277	12.191	-0.877374	90.6843	-0.0652647
14.9877	162.361	12.1907	-0.877022	90.6826	-0.0652385
14.996	162.444	12.1905	-0.876651	90.6809	-0.0652109
15.0043	162.529	12.1903	-0.876291	90.6794	-0.0651841
15.0127	162.615	12.1901	-0.875959	90.6777	-0.0651595
15.021	162.696	12.1899	-0.875605	90.6763	-0.0651331
15.0293	162.781	12.1897	-0.875261	90.6747	-0.0651075
15.0377	162.866	12.1895	-0.874899	90.6729	-0.0650806
15.046	162.953	12.1892	-0.874564	90.6711	-0.0650557
15.0543	163.032	12.189	-0.874241	90.6694	-0.0650316
15.0627	163.115	12.1888	-0.873913	90.6679	-0.0650072
15.071	163.202	12.1886	-0.873569	90.6663	-0.0649817
15.0793	163.283	12.1883	-0.873224	90.6645	-0.064956
15.0877	163.364	12.1881	-0.872874	90.6628	-0.06493
15.096	163.445	12.1878	-0.872498	90.661	-0.064902
15.1043	163.531	12.1876	-0.872142	90.6593	-0.0648755
15.1127	163.615	12.1874	-0.871788	90.658	-0.0648492
15.121	163.698	12.1873	-0.871469	90.6566	-0.0648254
15.1293	163.783	12.1871	-0.871141	90.6551	-0.064801
15.1377	163.871	12.1868	-0.870815	90.6535	-0.0647768
15.146	163.957	12.1866	-0.870447	90.6517	-0.0647494
15.1543	164.038	12.1864	-0.870084	90.6502	-0.0647224
15.1627	164.123	12.1862	-0.869752	90.6488	-0.0646977
15.171	164.204	12.186	-0.869436	90.6472	-0.0646742
15.1793	164.289	12.1858	-0.869139	90.6457	-0.0646521
15.1877	164.374	12.1856	-0.868827	90.6441	-0.0646289
15.196	164.458	12.1853	-0.868531	90.6424	-0.0646069
15.2043	164.539	12.1851	-0.868179	90.6407	-0.0645807
15.2127	164.63	12.1849	-0.867833	90.6392	-0.0645549
15.221	164.712	12.1847	-0.867506	90.638	-0.0645307
15.2293	164.797	12.1846	-0.867173	90.6367	-0.0645059
15.2377	164.878	12.1843	-0.866872	90.6349	-0.0644835
15.246	164.959	12.1841	-0.866567	90.633	-0.0644608
15.2543	165.045	12.1839	-0.866226	90.6316	-0.0644354
15.2627	165.132	12.1837	-0.865873	90.6301	-0.0644091
15.271	165.218	12.1835	-0.865538	90.6287	-0.0643842
15.2793	165.296	12.1833	-0.865164	90.6269	-0.0643564
15.2877	165.376	12.1831	-0.86482	90.6255	-0.0643308
15.296	165.46	12.1829	-0.864475	90.6239	-0.0643051
15.3043	165.544	12.1826	-0.864122	90.6222	-0.0642789
15.3127	165.629	12.1824	-0.863827	90.6205	-0.064257
15.321	165.712	12.1822	-0.863517	90.619	-0.0642339
15.3293	165.798	12.182	-0.863193	90.6176	-0.0642098
15.3377	165.88	12.1818	-0.862878	90.6157	-0.0641864
15.346	165.964	12.1815	-0.862516	90.614	-0.0641594
15.3543	166.047	12.1813	-0.862167	90.6124	-0.0641335
15.3627	166.133	12.1811	-0.861845	90.6108	-0.0641095
15.371	166.211	12.1809	-0.861537	90.6093	-0.0640866
15.3793	166.301	12.1807	-0.861221	90.6079	-0.0640631
15.3877	166.377	12.1805	-0.860905	90.6066	-0.0640396
15.396	166.465	12.1803	-0.860587	90.6049	-0.064016
15.4043	166.543	12.1801	-0.860237	90.6034	-0.06399
15.4127	166.632	12.1799	-0.859889	90.602	-0.0639641
15.421	166.718	12.1798	-0.859545	90.6008	-0.0639385
15.4293	166.798	12.1796	-0.85926	90.5993	-0.0639172
15.4377	166.88	12.1793	-0.858942	90.5976	-0.0638936
15.446	166.965	12.1791	-0.858581	90.596	-0.0638668
15.4543	167.046	12.1789	-0.858237	90.5945	-0.0638412
15.4627	167.131	12.1787	-0.857917	90.5927	-0.0638173
15.471	167.217	12.1784	-0.857577	90.5909	-0.0637921
15.4793	167.299	12.1782	-0.857236	90.5894	-0.0637667
15.4877	167.385	12.178	-0.856914	90.588	-0.0637427
15.496	167.466	12.1778	-0.856574	90.5863	-0.0637174
15.5043	167.551	12.1776	-0.856234	90.5848	-0.0636922
15.5127	167.636	12.1774	-0.855899	90.5834	-0.0636672
15.521	167.725	12.1772	-0.855589	90.582	-0.0636442
15.5293	167.807	12.177	-0.85532	90.5806	-0.0636242
15.5377	167.885	12.1768	-0.855007	90.5791	-0.0636009
15.546	167.969	12.1767	-0.854643	90.5778	-0.0635738
15.5543	168.051	12.1765	-0.854326	90.5764	-0.0635502
15.5627	168.135	12.1763	-0.854002	90.5751	-0.0635261
15.571	168.221	12.1761	-0.853676	90.5736	-0.0635019
15.5793	168.301	12.1759	-0.853358	90.5721	-0.0634782
15.5877	168.386	12.1757	-0.85304	90.5703	-0.0634546
15.596	168.471	12.1755	-0.852708	90.5688	-0.0634299
15.6043	168.553	12.1753	-0.852392	90.5674	-0.0634064
15.6127	168.637	12.1751	-0.85208	90.5659	-0.0633831
15.621	168.722	12.1748	-0.85176	90.5643	-0.0633593
15.6293	168.806	12.1746	-0.851439	90.5627	-0.0633355
15.6377	168.885	12.1744	-0.851082	90.5612	-0.0633089
15.646	168.971	12.1742	-0.850737	90.5597	-0.0632832
15.6543	169.056	12.174	-0.850411	90.5581	-0.063259
15.6627	169.141	12.1738	-0.850074	90.5568	-0.0632339
15.671	169.225	12.1737	-0.849762	90.5555	-0.0632107
15.6793	169.309	12.1735	-0.849441	90.554	-0.0631868
15.6877	169.391	12.1733	-0.849103	90.5526	-0.0631617
15.696	169.476	12.1731	-0.848737	90.551	-0.0631345
15.7043	169.559	12.1729	-0.848396	90.5496	-0.0631092
15.7127	169.642	12.1727	-0.848103	90.548	-0.0630873
15.721	169.729	12.1725	-0.847805	90.5465	-0.0630651
15.7293	169.811	12.1722	-0.847485	90.5449	-0.0630414
15.7377	169.898	12.172	-0.847168	90.5432	-0.0630178
15.746	169.98	12.1718	-0.846868	90.5418	-0.0629954
15.7543	170.062	12.1716	-0.846544	90.5404	-0.0629713
15.7627	170.147	12.1715	-0.846235	90.5392	-0.0629484
15.771	170.228	12.1713	-0.845923	90.5376	-0.0629251
15.7793	170.313	12.1711	-0.845627	90.5363	-0.0629032
15.7877	170.395	12.1709	-0.845312	90.5349	-0.0628797
15.796	170.481	12.1707	-0.845	90.5334	-0.0628565
15.8043	170.565	12.1705	-0.844689	90.532	-0.0628334
15.8127	170.646	12.1703	-0.844374	90.5306	-0.06281
15.821	170.733	12.1701	-0.844074	90.5293	-0.0627876
15.8293	170.815	12.17	-0.843771	90.5279	-0.0627651
15.8377	170.901	12.1698	-0.843431	90.5264	-0.0627398
15.846	170.98	12.1696	-0.843117	90.5251	-0.0627165
15.8543	171.064	12.1694	-0.842795	90.5238	-0.0626925
15.8627	171.147	12.1692	-0.84247	90.5224	-0.0626683
15.871	171.232	12.169	-0.842142	90.5209	-0.0626439
15.8793	171.312	12.1688	-0.841815	90.5196	-0.0626196
15.8877	171.397	12.1687	-0.841504	90.5183	-0.0625964
15.896	171.484	12.1685	-0.841169	90.5169	-0.0625715
15.9043	171.566	12.1683	-0.840843	90.5157	-0.0625473
15.9127	171.652	12.1681	-0.840562	90.5141	-0.0625264
15.921	171.734	12.1679	-0.840279	90.5124	-0.0625054
15.9293	171.818	12.1676	-0.839965	90.5107	-0.062482
15.9377	171.901	12.1674	-0.839654	90.5092	-0.0624588
15.946	171.986	12.1672	-0.839361	90.5076	-0.062437
15.9543	172.068	12.167	-0.839085	90.5063	-0.0624165
15.9627	172.154	12.1669	-0.838786	90.5049	-0.0623942
15.971	172.237	12.1667	-0.838487	90.5035	-0.062372
15.9793	172.321	12.1665	-0.838197	90.5021	-0.0623504
15.9877	172.401	12.1663	-0.837868	90.5007	-0.062326
15.996	172.485	12.1661	-0.837499	90.4994	-0.0622986
16.0043	172.567	12.166	-0.837188	90.4981	-0.0622754
16.0127	172.653	12.1658	-0.836862	90.4968	-0.0622512
16.021	172.736	12.1656	-0.836558	90.4954	-0.0622285
16.0293	172.826	12.1654	-0.836213	90.4939	-0.0622029
16.0377	172.908	12.1652	-0.835878	90.4923	-0.062178
16.046	172.989	12.165	-0.835561	90.4908	-0.0621543
16.0543	173.071	12.1648	-0.83521	90.4894	-0.0621282
16.0627	173.158	12.1646	-0.834891	90.4881	-0.0621046
16.071	173.241	12.1644	-0.834596	90.4866	-0.0620825
16.0793	173.322	12.1642	-0.83432	90.4852	-0.0620621
16.0877	173.406	12.164	-0.834034	90.4837	-0.0620407
16.096	173.492	12.1638	-0.83375	90.4823	-0.0620197
16.1043	173.574	12.1637	-0.833425	90.481	-0.0619955
16.1127	173.658	12.1635	-0.833121	90.4797	-0.0619729
16.121	173.744	12.1633	-0.832831	90.4783	-0.0619513
16.1293	173.826	12.1631	-0.832536	90.4769	-0.0619293
16.1377	173.907	12.1629	-0.83228	90.4753	-0.0619103
16.146	173.995	12.1627	-0.831993	90.4737	-0.0618889
16.1543	174.076	12.1625	-0.831692	90.4724	-0.0618665
16.1627	174.16	12.1623	-0.831391	90.4708	-0.0618442
16.171	174.243	12.1621	-0.831066	90.4695	-0.06182
16.1793	174.325	12.1619	-0.830743	90.4683	-0.0617959
16.1877	174.409	12.1617	-0.830444	90.4668	-0.0617738
16.196	174.494	12.1616	-0.830147	90.4654	-0.0617517
16.2043	174.579	12.1614	-0.829845	90.464	-0.0617292
16.2127	174.664	12.1612	-0.829517	90.4625	-0.0617048
16.221	174.747	12.161	-0.829204	90.4611	-0.0616815
16.2293	174.83	12.1608	-0.828882	90.4597	-0.0616576
16.2377	174.911	12.1606	-0.828566	90.4583	-0.061634
16.246	174.994	12.1604	-0.82825	90.4569	-0.0616105
16.2543	175.08	12.1602	-0.827968	90.4555	-0.0615895
16.2627	175.166	12.16	-0.827683	90.4541	-0.0615684
16.271	175.245	12.1598	-0.827397	90.4527	-0.061547
16.2793	175.332	12.1597	-0.827116	90.4515	-0.0615262
16.2877	175.418	12.1595	-0.826796	90.4504	-0.0615024
16.296	175.501	12.1594	-0.82649	90.4492	-0.0614796
16.3043	175.586	12.1592	-0.82617	90.4478	-0.0614558
16.3127	175.671	12.159	-0.825899	90.4466	-0.0614357
16.321	175.756	12.1588	-0.825611	90.4453	-0.0614142
16.3293	175.835	12.1587	-0.825301	90.4442	-0.0613911
16.3377	175.924	12.1585	-0.824997	90.443	-0.0613685
16.346	176.003	12.1584	-0.824689	90.4416	-0.0613456
16.3543	176.091	12.1582	-0.8244	90.4405	-0.0613241
16.3627	176.174	12.158	-0.824086	90.439	-0.0613008
16.371	176.256	12.1578	-0.823802	90.4376	-0.0612796
16.3793	176.341	12.1576	-0.823537	90.4362	-0.0612599
16.3877	176.423	12.1575	-0.823243	90.435	-0.0612381
16.396	176.509	12.1573	-0.822937	90.4335	-0.0612153
16.4043	176.593	12.1571	-0.822666	90.4323	-0.0611951
16.4127	176.676	12.1569	-0.822399	90.4309	-0.0611753
16.421	176.761	12.1567	-0.822113	90.4295	-0.061154
16.4293	176.846	12.1566	-0.821818	90.4283	-0.0611321
16.4377	176.929	12.1563	-0.821523	90.4267	-0.0611101
16.446	177.01	12.1562	-0.821241	90.4253	-0.0610891
16.4543	177.097	12.156	-0.820969	90.4238	-0.0610689
16.4627	177.173	12.1558	-0.820691	90.4223	-0.0610483
16.471	177.26	12.1556	-0.820431	90.421	-0.0610289
16.4793	177.343	12.1554	-0.820157	90.4196	-0.0610085
16.4877	177.424	12.1552	-0.819853	90.4183	-0.0609859
16.496	177.508	12.155	-0.819563	90.417	-0.0609643
16.5043	177.595	12.1548	-0.819267	90.4155	-0.0609423
16.5127	177.679	12.1547	-0.81899	90.414	-0.0609217
16.521	177.763	12.1545	-0.818702	90.4126	-0.0609003
16.5293	177.845	12.1543	-0.818417	90.4113	-0.0608791
16.5377	177.925	12.1541	-0.818134	90.4101	-0.060858
16.546	178.006	12.1539	-0.817852	90.4088	-0.060837
16.5543	178.099	12.1538	-0.817564	90.4075	-0.0608156
16.5627	178.177	12.1536	-0.817284	90.4062	-0.0607948
16.571	178.266	12.1534	-0.817005	90.4048	-0.060774
16.5793	178.349	12.1532	-0.816726	90.4033	-0.0607533
16.5877	178.429	12.153	-0.816457	90.402	-0.0607333
16.596	178.515	12.1529	-0.81617	90.4009	-0.0607119
16.6043	178.599	12.1527	-0.815879	90.3998	-0.0606903
16.6127	178.686	12.1526	-0.815609	90.3986	-0.0606702
16.621	178.769	12.1524	-0.815303	90.397	-0.0606474
16.6293	178.85	12.1522	-0.815015	90.3958	-0.060626
16.6377	178.936	12.152	-0.814724	90.3944	-0.0606044
16.646	179.021	12.1518	-0.814452	90.3931	-0.0605842
[truncated: 9,901 more rows]
