# Supplementary material for: Comparative study on mechanisms for improving mechanical properties and microstructure of cement paste modified by different types of nanomaterials
Source: publisher site journal article supplement (doi:10.1515/ntrev-2021-0027), 2021-01-01
Supplement: Supplementary file 11 [file NG-0.03-28d.xlsx]

## Sheet: Sheet1
Time (min)	Temperature (°C)	Weight (mg)			Temperature Difference (°C/mg)
0.00293333	22.848	12.7189	-0.72899	100	-0.0573154
0.00433333	22.8869	12.7188	-0.729007	99.9991	-0.0573167
0.0126667	22.9314	12.7186	-0.729013	99.9976	-0.0573172
0.021	22.9668	12.7184	-0.728977	99.9958	-0.0573143
0.0293333	23.004	12.7182	-0.72893	99.9939	-0.0573107
0.0376667	23.0429	12.7179	-0.728887	99.9918	-0.0573072
0.046	23.0817	12.7176	-0.728799	99.9894	-0.0573003
0.0543333	23.1197	12.7173	-0.728716	99.9869	-0.0572938
0.0626667	23.1563	12.7169	-0.728664	99.9843	-0.0572897
0.071	23.1928	12.7165	-0.728603	99.9813	-0.0572849
0.0793333	23.2315	12.7162	-0.728548	99.9782	-0.0572806
0.0876667	23.2707	12.7157	-0.728495	99.9748	-0.0572764
0.096	23.3133	12.7153	-0.728479	99.9715	-0.0572752
0.104333	23.3407	12.7149	-0.728514	99.9682	-0.0572779
0.112667	23.3873	12.7144	-0.728543	99.9647	-0.0572802
0.121	23.4172	12.714	-0.728589	99.9616	-0.0572838
0.129333	23.4575	12.7136	-0.728677	99.9583	-0.0572908
0.137667	23.493	12.7132	-0.72878	99.9548	-0.0572988
0.146	23.531	12.7127	-0.728898	99.9514	-0.0573081
0.154333	23.5656	12.7123	-0.729093	99.948	-0.0573235
0.162667	23.6029	12.7119	-0.729268	99.9446	-0.0573372
0.171	23.637	12.7114	-0.729416	99.941	-0.0573488
0.179333	23.6649	12.711	-0.729609	99.9375	-0.0573641
0.187667	23.7092	12.7106	-0.729812	99.9342	-0.05738
0.196	23.7389	12.7101	-0.730072	99.9307	-0.0574004
0.204333	23.7785	12.7096	-0.730363	99.9268	-0.0574233
0.212667	23.8096	12.7092	-0.730687	99.9233	-0.0574488
0.221	23.8457	12.7087	-0.730982	99.9198	-0.057472
0.229333	23.8836	12.7083	-0.731282	99.9162	-0.0574956
0.237667	23.9161	12.7078	-0.731557	99.9125	-0.0575172
0.246	23.946	12.7074	-0.731912	99.909	-0.0575451
0.254333	23.98	12.7069	-0.732328	99.9055	-0.0575778
0.262667	24.0174	12.7065	-0.732712	99.902	-0.057608
0.271	24.0439	12.706	-0.733159	99.898	-0.0576432
0.279333	24.0806	12.7055	-0.733601	99.8944	-0.0576779
0.287667	24.1213	12.705	-0.734074	99.8909	-0.057715
0.296	24.1507	12.7045	-0.734563	99.8869	-0.0577535
0.304333	24.1841	12.7041	-0.735127	99.8832	-0.0577979
0.312667	24.2172	12.7036	-0.735648	99.8794	-0.0578388
0.321	24.2472	12.7031	-0.736223	99.8755	-0.057884
0.329333	24.2791	12.7026	-0.736822	99.8713	-0.0579311
0.337667	24.3171	12.702	-0.737439	99.8672	-0.0579797
0.346	24.3471	12.7015	-0.738055	99.8631	-0.0580281
0.354333	24.3808	12.701	-0.738659	99.8591	-0.0580755
0.362667	24.4084	12.7005	-0.739274	99.8553	-0.0581239
0.371	24.4435	12.7	-0.739881	99.8511	-0.0581717
0.379333	24.4752	12.6995	-0.740544	99.847	-0.0582238
0.387667	24.5096	12.6989	-0.741218	99.8427	-0.0582768
0.396	24.5337	12.6984	-0.741983	99.8387	-0.0583369
0.404333	24.571	12.6979	-0.742735	99.8343	-0.058396
0.412667	24.6015	12.6973	-0.743492	99.8301	-0.0584555
0.421	24.637	12.6968	-0.74426	99.8259	-0.0585159
0.429333	24.6688	12.6962	-0.745053	99.8214	-0.0585783
0.437667	24.7011	12.6957	-0.745851	99.817	-0.058641
0.446	24.7475	12.6951	-0.746688	99.8125	-0.0587068
0.454333	24.7725	12.6945	-0.747526	99.8081	-0.0587727
0.462667	24.8034	12.694	-0.748371	99.8037	-0.0588391
0.471	24.8321	12.6934	-0.749227	99.7993	-0.0589065
0.479333	24.866	12.6928	-0.750118	99.7946	-0.0589765
0.487667	24.8985	12.6922	-0.751029	99.7902	-0.0590481
0.496	24.9399	12.6917	-0.751923	99.7858	-0.0591184
0.504333	24.9677	12.6911	-0.752839	99.7813	-0.0591904
0.512667	25.0058	12.6906	-0.753807	99.777	-0.0592665
0.521	25.0359	12.69	-0.754812	99.7725	-0.0593456
0.529333	25.0688	12.6895	-0.755809	99.7682	-0.059424
0.537667	25.1007	12.6889	-0.756824	99.7638	-0.0595038
0.546	25.1439	12.6883	-0.757852	99.7593	-0.0595846
0.554333	25.1699	12.6877	-0.758909	99.7547	-0.0596677
0.562667	25.2085	12.6872	-0.75995	99.7502	-0.0597495
0.571	25.2452	12.6866	-0.760997	99.7456	-0.0598318
0.579333	25.2756	12.686	-0.762081	99.7411	-0.0599171
0.587667	25.3125	12.6854	-0.76317	99.7363	-0.0600027
0.596	25.3446	12.6848	-0.76426	99.7317	-0.0600884
0.604333	25.3808	12.6842	-0.765361	99.7271	-0.060175
0.612667	25.4142	12.6836	-0.766509	99.7224	-0.0602653
0.621	25.4517	12.683	-0.767716	99.7177	-0.0603601
0.629333	25.4907	12.6824	-0.768911	99.7129	-0.0604541
0.637667	25.5312	12.6818	-0.770067	99.7082	-0.060545
0.646	25.5638	12.6812	-0.771237	99.7035	-0.060637
0.654333	25.5994	12.6806	-0.772454	99.6987	-0.0607326
0.662667	25.64	12.68	-0.773669	99.6941	-0.0608282
0.671	25.6767	12.6794	-0.774907	99.6891	-0.0609255
0.679333	25.7155	12.6788	-0.776114	99.6842	-0.0610204
0.687667	25.7559	12.6781	-0.777344	99.6791	-0.0611171
0.696	25.7931	12.6775	-0.778596	99.6742	-0.0612155
0.704333	25.8324	12.6769	-0.779813	99.6692	-0.0613112
0.712667	25.8698	12.6762	-0.781053	99.6643	-0.0614087
0.721	25.9095	12.6756	-0.782354	99.6592	-0.061511
0.729333	25.949	12.6749	-0.783639	99.654	-0.061612
0.737667	25.9862	12.6743	-0.78492	99.6488	-0.0617127
0.746	26.0314	12.6736	-0.786259	99.6436	-0.061818
0.754333	26.0808	12.673	-0.78754	99.6387	-0.0619187
0.762667	26.1111	12.6723	-0.788881	99.6338	-0.0620241
0.771	26.161	12.6717	-0.790227	99.6287	-0.06213
0.779333	26.197	12.6711	-0.791534	99.6236	-0.0622328
0.787667	26.2426	12.6705	-0.792849	99.6188	-0.0623361
0.796	26.2853	12.6698	-0.794219	99.6139	-0.0624438
0.804333	26.3262	12.6692	-0.795562	99.6089	-0.0625494
0.812667	26.3655	12.6685	-0.796942	99.6039	-0.062658
0.821	26.4124	12.6679	-0.79835	99.599	-0.0627686
0.829333	26.4556	12.6673	-0.799711	99.5941	-0.0628756
0.837667	26.4985	12.6667	-0.801173	99.5891	-0.0629906
0.846	26.5463	12.666	-0.802634	99.5841	-0.0631055
0.854333	26.5932	12.6654	-0.804059	99.5793	-0.0632175
0.862667	26.6427	12.6648	-0.805512	99.5741	-0.0633318
0.871	26.6856	12.6641	-0.807028	99.5686	-0.0634509
0.879333	26.7299	12.6634	-0.808514	99.5634	-0.0635678
0.887667	26.7817	12.6628	-0.810037	99.5583	-0.0636875
0.896	26.8313	12.6621	-0.811555	99.5531	-0.0638069
0.904333	26.8778	12.6614	-0.813042	99.5475	-0.0639237
0.912667	26.921	12.6607	-0.814601	99.5419	-0.0640464
0.921	26.9678	12.66	-0.816139	99.5364	-0.0641673
0.929333	27.0176	12.6593	-0.817651	99.5311	-0.0642861
0.937667	27.0665	12.6586	-0.819245	99.5257	-0.0644115
0.946	27.1166	12.6579	-0.820846	99.5205	-0.0645373
0.954333	27.1615	12.6573	-0.822457	99.5151	-0.064664
0.962667	27.2208	12.6566	-0.824052	99.5099	-0.0647894
0.971	27.2656	12.6559	-0.825648	99.5045	-0.0649149
0.979333	27.3234	12.6552	-0.82726	99.4993	-0.0650416
0.987667	27.3717	12.6546	-0.828884	99.4939	-0.0651693
0.996	27.4217	12.6539	-0.830476	99.4884	-0.0652945
1.00433	27.4732	12.6532	-0.832115	99.4831	-0.0654234
1.01267	27.5278	12.6525	-0.833828	99.4776	-0.065558
1.021	27.5779	12.6518	-0.83547	99.4722	-0.0656871
1.02933	27.6335	12.6511	-0.837138	99.4665	-0.0658183
1.03767	27.6884	12.6504	-0.838788	99.4609	-0.065948
1.046	27.7428	12.6496	-0.840467	99.4551	-0.06608
1.05433	27.7958	12.6489	-0.84214	99.4496	-0.0662116
1.06267	27.8469	12.6482	-0.843819	99.4441	-0.0663436
1.071	27.9128	12.6475	-0.84549	99.4387	-0.0664749
1.07933	27.9624	12.6469	-0.847222	99.4334	-0.0666111
1.08767	28.0211	12.6462	-0.848936	99.4278	-0.0667459
1.096	28.0766	12.6454	-0.850613	99.4221	-0.0668777
1.10433	28.1343	12.6447	-0.852344	99.4163	-0.0670139
1.11267	28.1934	12.6439	-0.854104	99.4104	-0.0671522
1.121	28.2527	12.6432	-0.85587	99.4049	-0.067291
1.12933	28.3117	12.6425	-0.857632	99.3992	-0.0674296
1.13767	28.3665	12.6418	-0.859436	99.3935	-0.0675714
1.146	28.4285	12.641	-0.861256	99.3876	-0.0677145
1.15433	28.4894	12.6403	-0.863096	99.3816	-0.0678592
1.16267	28.5521	12.6396	-0.864874	99.376	-0.067999
1.171	28.6115	12.6388	-0.866667	99.3698	-0.0681399
1.17933	28.666	12.638	-0.868497	99.3636	-0.0682838
1.18767	28.7316	12.6372	-0.870313	99.3577	-0.0684266
1.196	28.7905	12.6365	-0.872119	99.3519	-0.0685686
1.20433	28.8573	12.6357	-0.873934	99.3459	-0.0687113
1.21267	28.9185	12.635	-0.875788	99.3399	-0.068857
1.221	28.9766	12.6342	-0.877697	99.3339	-0.0690071
1.22933	29.0383	12.6334	-0.879568	99.3279	-0.0691542
1.23767	29.1063	12.6327	-0.881468	99.322	-0.0693036
1.246	29.1668	12.6319	-0.883377	99.3157	-0.0694537
1.25433	29.2317	12.6311	-0.885297	99.3096	-0.0696046
1.26267	29.2982	12.6304	-0.8872	99.3037	-0.0697543
1.271	29.3661	12.6296	-0.889162	99.2976	-0.0699085
1.27933	29.4234	12.6288	-0.891154	99.2912	-0.0700652
1.28767	29.4945	12.628	-0.893142	99.2847	-0.0702214
1.296	29.5585	12.6271	-0.895084	99.2782	-0.0703742
1.30433	29.6254	12.6263	-0.897007	99.2718	-0.0705253
1.31267	29.6927	12.6255	-0.898999	99.2656	-0.070682
1.321	29.7633	12.6247	-0.900967	99.259	-0.0708367
1.32933	29.8316	12.6239	-0.902956	99.2526	-0.0709931
1.33767	29.8981	12.6231	-0.904969	99.2465	-0.0711514
1.346	29.9685	12.6223	-0.907013	99.24	-0.0713121
1.35433	30.0359	12.6214	-0.909044	99.2335	-0.0714717
1.36267	30.1082	12.6206	-0.911045	99.2271	-0.0716291
1.371	30.1717	12.6198	-0.91308	99.2208	-0.071789
1.37933	30.2457	12.6191	-0.915153	99.2149	-0.0719521
1.38767	30.3116	12.6183	-0.917211	99.2087	-0.0721139
1.396	30.3856	12.6175	-0.919283	99.2024	-0.0722767
1.40433	30.4562	12.6166	-0.921374	99.1958	-0.0724412
1.41267	30.5305	12.6158	-0.923496	99.1892	-0.072608
1.421	30.6005	12.615	-0.925587	99.1825	-0.0727724
1.42933	30.6709	12.6141	-0.927692	99.1758	-0.0729379
1.43767	30.7464	12.6132	-0.9298	99.169	-0.0731037
1.446	30.8127	12.6123	-0.931924	99.162	-0.0732707
1.45433	30.8912	12.6115	-0.934074	99.1554	-0.0734397
1.46267	30.9662	12.6106	-0.936207	99.1484	-0.0736074
1.471	31.0364	12.6098	-0.938382	99.1416	-0.0737784
1.47933	31.1121	12.6089	-0.940552	99.1349	-0.073949
1.48767	31.1837	12.608	-0.942734	99.1281	-0.0741206
1.496	31.2577	12.6072	-0.944912	99.1212	-0.0742918
1.50433	31.3373	12.6062	-0.947108	99.114	-0.0744644
1.51267	31.4095	12.6054	-0.949286	99.1071	-0.0746357
1.521	31.4856	12.6045	-0.951486	99.1004	-0.0748086
1.52933	31.562	12.6037	-0.953726	99.0937	-0.0749848
1.53767	31.6358	12.6028	-0.955909	99.0867	-0.0751564
1.546	31.7099	12.6019	-0.958165	99.0797	-0.0753338
1.55433	31.7898	12.601	-0.960421	99.0726	-0.0755111
1.56267	31.8705	12.6	-0.962651	99.0653	-0.0756865
1.571	31.945	12.5991	-0.964892	99.0577	-0.0758627
1.57933	32.0223	12.5981	-0.967174	99.0503	-0.0760421
1.58767	32.099	12.5973	-0.96947	99.0433	-0.0762226
1.596	32.1732	12.5963	-0.9718	99.0362	-0.0764058
1.60433	32.2522	12.5954	-0.974087	99.0289	-0.0765856
1.61267	32.3352	12.5945	-0.976396	99.0215	-0.0767672
1.621	32.4109	12.5935	-0.978751	99.0141	-0.0769523
1.62933	32.4911	12.5926	-0.981082	99.0067	-0.0771356
1.63767	32.5688	12.5916	-0.983377	98.999	-0.077316
1.646	32.6511	12.5907	-0.985743	98.9916	-0.0775021
1.65433	32.7312	12.5898	-0.988098	98.9845	-0.0776872
1.66267	32.8114	12.5888	-0.990452	98.9772	-0.0778723
1.671	32.8864	12.5879	-0.992779	98.9695	-0.0780552
1.67933	32.9718	12.5869	-0.995107	98.9618	-0.0782383
1.68767	33.0515	12.5859	-0.997508	98.9543	-0.078427
1.696	33.1319	12.585	-0.999853	98.9469	-0.0786114
1.70433	33.2098	12.584	-1.00221	98.9395	-0.0787966
1.71267	33.2915	12.5831	-1.00458	98.9318	-0.0789827
1.721	33.3689	12.5821	-1.00698	98.9244	-0.0791715
1.72933	33.4562	12.5812	-1.00934	98.9168	-0.0793575
1.73767	33.5397	12.5802	-1.01174	98.9089	-0.0795462
1.746	33.6229	12.5792	-1.01413	98.901	-0.0797338
1.75433	33.701	12.5782	-1.01654	98.8931	-0.0799233
1.76267	33.7865	12.5771	-1.01897	98.8853	-0.0801148
1.771	33.8645	12.5761	-1.02139	98.8773	-0.0803044
1.77933	33.9507	12.5751	-1.02379	98.8692	-0.0804936
1.78767	34.0347	12.5741	-1.0262	98.8615	-0.0806827
1.796	34.1196	12.5731	-1.02866	98.8538	-0.0808759
1.80433	34.1968	12.5721	-1.03114	98.8456	-0.0810716
1.81267	34.2877	12.5711	-1.03365	98.8375	-0.0812685
1.821	34.372	12.5701	-1.03613	98.8298	-0.0814639
1.82933	34.4527	12.5691	-1.03863	98.8221	-0.08166
1.83767	34.5387	12.5681	-1.04113	98.8144	-0.0818568
1.846	34.6174	12.5671	-1.04361	98.8065	-0.0820521
1.85433	34.706	12.5661	-1.04612	98.7985	-0.0822489
1.86267	34.7863	12.5651	-1.04869	98.7904	-0.082451
1.871	34.8696	12.564	-1.05127	98.7819	-0.0826537
1.87933	34.9607	12.5629	-1.05381	98.7735	-0.0828534
1.88767	35.0425	12.5619	-1.05628	98.7652	-0.0830475
1.896	35.1224	12.5608	-1.05883	98.7569	-0.0832482
1.90433	35.2099	12.5598	-1.06144	98.7486	-0.0834536
1.91267	35.299	12.5587	-1.06401	98.7401	-0.0836559
1.921	35.3824	12.5576	-1.06657	98.7317	-0.0838571
1.92933	35.4698	12.5565	-1.06919	98.7233	-0.0840633
1.93767	35.5551	12.5555	-1.0718	98.7147	-0.0842677
1.946	35.6414	12.5544	-1.07439	98.7063	-0.0844714
1.95433	35.7261	12.5533	-1.07698	98.6978	-0.0846754
1.96267	35.8124	12.5523	-1.07955	98.6895	-0.0848775
1.971	35.8996	12.5512	-1.08217	98.681	-0.0850837
1.97933	35.9855	12.5501	-1.08471	98.6723	-0.085283
1.98767	36.072	12.5489	-1.08729	98.6636	-0.0854857
1.996	36.1522	12.5479	-1.08994	98.6549	-0.0856943
2.00433	36.2447	12.5467	-1.09259	98.646	-0.0859031
2.01267	36.3316	12.5456	-1.09522	98.6371	-0.0861093
2.021	36.4163	12.5444	-1.09783	98.6282	-0.0863148
2.02933	36.5059	12.5433	-1.10045	98.6191	-0.0865206
2.03767	36.5913	12.5422	-1.10311	98.6103	-0.0867297
2.046	36.6816	12.541	-1.10579	98.6011	-0.0869406
2.05433	36.7686	12.5399	-1.10845	98.5923	-0.0871499
2.06267	36.8512	12.5388	-1.11113	98.5836	-0.0873602
2.071	36.9416	12.5376	-1.11375	98.5746	-0.0875665
2.07933	37.0313	12.5365	-1.11637	98.5655	-0.087772
2.08767	37.111	12.5353	-1.11902	98.5563	-0.0879806
2.096	37.201	12.5342	-1.12167	98.5474	-0.0881889
2.10433	37.2928	12.533	-1.12435	98.5383	-0.0883994
2.11267	37.3718	12.5319	-1.12704	98.5291	-0.0886111
2.121	37.4648	12.5307	-1.1297	98.5199	-0.0888201
2.12933	37.5498	12.5295	-1.13238	98.5107	-0.0890311
2.13767	37.6336	12.5283	-1.1351	98.501	-0.0892451
2.146	37.7275	12.527	-1.13787	98.491	-0.0894626
2.15433	37.8128	12.5257	-1.14062	98.4811	-0.0896788
2.16267	37.9029	12.5245	-1.14332	98.4711	-0.089891
2.171	37.9863	12.5232	-1.14604	98.4611	-0.0901049
2.17933	38.076	12.5219	-1.14874	98.4512	-0.0903174
2.18767	38.1639	12.5207	-1.15146	98.4413	-0.0905314
2.196	38.2536	12.5195	-1.1542	98.4317	-0.0907469
2.20433	38.3406	12.5182	-1.15696	98.4221	-0.0909638
2.21267	38.4307	12.517	-1.15967	98.4124	-0.0911769
2.221	38.5212	12.5158	-1.16239	98.4029	-0.0913907
2.22933	38.6024	12.5146	-1.16509	98.3937	-0.0916031
2.23767	38.6916	12.5134	-1.1678	98.3841	-0.0918157
2.246	38.775	12.5122	-1.17056	98.3747	-0.0920328
2.25433	38.8736	12.5111	-1.17328	98.3657	-0.0922466
2.26267	38.9597	12.5099	-1.17604	98.3563	-0.0924634
2.271	39.044	12.5087	-1.17879	98.3469	-0.09268
2.27933	39.1343	12.5074	-1.18155	98.3372	-0.0928972
2.28767	39.2266	12.5062	-1.1843	98.3274	-0.0931129
2.296	39.3143	12.5049	-1.18705	98.3174	-0.0933296
2.30433	39.3973	12.5037	-1.18981	98.3074	-0.0935464
2.31267	39.4856	12.5024	-1.19256	98.2973	-0.0937629
2.321	39.5722	12.5011	-1.19537	98.2875	-0.0939831
2.32933	39.6565	12.4999	-1.19816	98.2776	-0.0942028
2.33767	39.7458	12.4986	-1.20099	98.2674	-0.0944253
2.346	39.838	12.4972	-1.20381	98.257	-0.0946467
2.35433	39.9246	12.4959	-1.20662	98.2467	-0.094868
2.36267	40.0119	12.4946	-1.20943	98.2363	-0.0950891
2.371	40.1	12.4933	-1.21224	98.226	-0.0953099
2.37933	40.1909	12.492	-1.21506	98.2157	-0.0955315
2.38767	40.2734	12.4907	-1.21787	98.2055	-0.0957529
2.396	40.3694	12.4893	-1.22071	98.195	-0.0959755
2.40433	40.4531	12.488	-1.22353	98.1845	-0.0961974
2.41267	40.5372	12.4867	-1.22633	98.1739	-0.0964174
2.421	40.6243	12.4854	-1.22912	98.1635	-0.0966371
2.42933	40.7114	12.484	-1.23193	98.1532	-0.0968581
2.43767	40.8043	12.4827	-1.23471	98.143	-0.0970766
2.446	40.8869	12.4814	-1.23748	98.1325	-0.097294
2.45433	40.9824	12.4801	-1.24032	98.1219	-0.0975176
2.46267	41.0693	12.4787	-1.24315	98.1112	-0.0977401
2.471	41.1593	12.4773	-1.24599	98.1005	-0.0979637
2.47933	41.2439	12.476	-1.24886	98.0899	-0.0981891
2.48767	41.33	12.4746	-1.25168	98.0792	-0.0984105
2.496	41.4184	12.4733	-1.25454	98.0687	-0.0986357
2.50433	41.5017	12.4719	-1.25738	98.058	-0.0988589
2.51267	41.59	12.4705	-1.26021	98.0471	-0.0990814
2.521	41.6747	12.4692	-1.2631	98.0362	-0.099309
2.52933	41.7638	12.4678	-1.26601	98.0254	-0.0995371
2.53767	41.8475	12.4664	-1.26882	98.0145	-0.0997583
2.546	41.9418	12.465	-1.27164	98.0036	-0.0999801
2.55433	42.026	12.4636	-1.27446	97.9928	-0.100202
2.56267	42.1147	12.4622	-1.27725	97.9818	-0.100421
2.571	42.2016	12.4608	-1.28006	97.9708	-0.100642
2.57933	42.2889	12.4594	-1.28288	97.9598	-0.100864
2.58767	42.374	12.458	-1.2857	97.9487	-0.101085
2.596	42.4557	12.4566	-1.28851	97.9378	-0.101306
2.60433	42.5425	12.4552	-1.29131	97.9265	-0.101526
2.61267	42.6291	12.4538	-1.2941	97.9152	-0.101746
2.621	42.7142	12.4524	-1.29691	97.9041	-0.101967
2.62933	42.8003	12.4509	-1.29974	97.8928	-0.10219
2.63767	42.8884	12.4495	-1.30253	97.8815	-0.102409
2.646	42.9788	12.4481	-1.30534	97.8703	-0.10263
2.65433	43.0596	12.4466	-1.30814	97.8589	-0.10285
2.66267	43.1455	12.4452	-1.31088	97.8475	-0.103065
2.671	43.2303	12.4437	-1.31368	97.8363	-0.103286
2.67933	43.3145	12.4423	-1.31651	97.8248	-0.103508
2.68767	43.3999	12.4408	-1.31927	97.8136	-0.103725
2.696	43.4892	12.4394	-1.32206	97.8022	-0.103945
2.70433	43.5743	12.4379	-1.32489	97.7906	-0.104167
2.71267	43.6602	12.4365	-1.32769	97.7791	-0.104387
2.721	43.7468	12.435	-1.33048	97.7679	-0.104606
2.72933	43.8311	12.4336	-1.33327	97.7568	-0.104826
2.73767	43.9197	12.4322	-1.33607	97.7456	-0.105046
2.746	44.0058	12.4308	-1.33887	97.7343	-0.105266
2.75433	44.0884	12.4293	-1.34166	97.7228	-0.105486
2.76267	44.1765	12.4278	-1.34442	97.7113	-0.105703
2.771	44.2633	12.4264	-1.34722	97.6999	-0.105923
2.77933	44.3519	12.425	-1.34994	97.6886	-0.106137
2.78767	44.4306	12.4235	-1.35263	97.6773	-0.106348
2.796	44.5147	12.4221	-1.35532	97.666	-0.106559
2.80433	44.6006	12.4206	-1.35806	97.6544	-0.106774
2.81267	44.6872	12.4191	-1.36075	97.6426	-0.106986
2.821	44.7732	12.4176	-1.36344	97.6309	-0.107198
2.82933	44.8565	12.4161	-1.36615	97.6192	-0.107411
2.83767	44.9419	12.4146	-1.36883	97.6076	-0.107621
2.846	45.0222	12.4131	-1.37149	97.5959	-0.107831
2.85433	45.1075	12.4116	-1.37416	97.5841	-0.10804
2.86267	45.1938	12.4101	-1.37685	97.5722	-0.108252
2.871	45.2786	12.4086	-1.37954	97.5602	-0.108463
2.87933	45.3593	12.4071	-1.38221	97.548	-0.108673
2.88767	45.4485	12.4055	-1.38488	97.5359	-0.108884
2.896	45.5266	12.404	-1.38758	97.5238	-0.109096
2.90433	45.6119	12.4025	-1.39026	97.5121	-0.109306
2.91267	45.6981	12.4009	-1.3929	97.4998	-0.109514
2.921	45.7806	12.3994	-1.39554	97.4878	-0.109721
2.92933	45.8672	12.3979	-1.39817	97.4758	-0.109928
2.93767	45.9486	12.3963	-1.40081	97.4637	-0.110135
2.946	46.03	12.3948	-1.4034	97.4518	-0.110339
2.95433	46.1142	12.3933	-1.40601	97.4401	-0.110545
2.96267	46.2034	12.3918	-1.4086	97.4283	-0.110748
2.971	46.2868	12.3903	-1.41116	97.4166	-0.11095
2.97933	46.367	12.3888	-1.41368	97.4047	-0.111148
2.98767	46.4485	12.3873	-1.41624	97.3926	-0.111349
2.996	46.5314	12.3858	-1.41881	97.3806	-0.111551
3.00433	46.6163	12.3842	-1.42142	97.3686	-0.111756
3.01267	46.7001	12.3827	-1.42397	97.3565	-0.111957
3.021	46.78	12.3812	-1.42646	97.3445	-0.112152
3.02933	46.8653	12.3796	-1.429	97.3323	-0.112352
3.03767	46.9437	12.3781	-1.43151	97.3201	-0.11255
3.046	47.0262	12.3765	-1.43405	97.3079	-0.11275
3.05433	47.1084	12.3749	-1.43661	97.2954	-0.11295
3.06267	47.1977	12.3733	-1.43913	97.2829	-0.113149
3.071	47.2701	12.3718	-1.44158	97.2704	-0.113341
3.07933	47.3562	12.3702	-1.44406	97.2582	-0.113536
3.08767	47.4432	12.3686	-1.44649	97.2459	-0.113727
3.096	47.525	12.3671	-1.44893	97.2337	-0.113919
3.10433	47.6056	12.3655	-1.45142	97.2214	-0.114115
3.11267	47.6857	12.364	-1.45386	97.2091	-0.114307
3.121	47.767	12.3624	-1.45629	97.1969	-0.114498
3.12933	47.8511	12.3608	-1.45868	97.1846	-0.114686
3.13767	47.9374	12.3593	-1.46104	97.1726	-0.114872
3.146	48.0153	12.3578	-1.46343	97.1606	-0.115059
3.15433	48.0928	12.3562	-1.46582	97.1485	-0.115248
3.16267	48.1729	12.3547	-1.46813	97.1364	-0.115429
3.171	48.2584	12.3531	-1.47047	97.1239	-0.115613
3.17933	48.3405	12.3515	-1.47277	97.1113	-0.115793
3.18767	48.4211	12.35	-1.47506	97.0992	-0.115974
3.196	48.4983	12.3484	-1.47735	97.087	-0.116153
3.20433	48.5812	12.3469	-1.47964	97.0748	-0.116333
3.21267	48.6613	12.3453	-1.48191	97.0623	-0.116512
3.221	48.7438	12.3437	-1.48418	97.05	-0.11669
3.22933	48.8255	12.3422	-1.4864	97.0376	-0.116866
3.23767	48.9081	12.3406	-1.48862	97.0255	-0.117039
3.246	48.9875	12.339	-1.49086	97.0131	-0.117216
3.25433	49.0719	12.3375	-1.49303	97.001	-0.117387
3.26267	49.1494	12.3359	-1.49525	96.9888	-0.117561
3.271	49.2294	12.3344	-1.49743	96.9763	-0.117733
3.27933	49.3123	12.3328	-1.49956	96.9638	-0.1179
3.28767	49.3885	12.3312	-1.50168	96.9516	-0.118066
3.296	49.4678	12.3296	-1.50378	96.9393	-0.118232
3.30433	49.5543	12.3281	-1.50586	96.9269	-0.118395
3.31267	49.6346	12.3265	-1.50796	96.9144	-0.11856
3.321	49.7104	12.3249	-1.51004	96.9019	-0.118724
3.32933	49.7948	12.3233	-1.51209	96.8894	-0.118885
3.33767	49.8765	12.3217	-1.5141	96.8772	-0.119043
3.346	49.9594	12.3202	-1.51609	96.865	-0.119199
3.35433	50.038	12.3186	-1.51811	96.8526	-0.119358
3.36267	50.1172	12.3171	-1.5201	96.8404	-0.119515
3.371	50.196	12.3155	-1.52205	96.8281	-0.119668
3.37933	50.2777	12.3139	-1.52398	96.8156	-0.11982
3.38767	50.3571	12.3123	-1.5259	96.8033	-0.11997
3.396	50.4429	12.3108	-1.52776	96.7912	-0.120117
3.40433	50.5176	12.3093	-1.52962	96.7791	-0.120263
3.41267	50.601	12.3077	-1.53151	96.767	-0.120412
3.421	50.6812	12.3062	-1.5334	96.7549	-0.12056
3.42933	50.7571	12.3046	-1.53528	96.7426	-0.120708
3.43767	50.842	12.3031	-1.53709	96.7303	-0.12085
3.446	50.9203	12.3015	-1.53888	96.7183	-0.120992
3.45433	50.9985	12.3	-1.54072	96.7062	-0.121136
3.46267	51.0805	12.2985	-1.54252	96.6942	-0.121277
3.471	51.1607	12.2969	-1.54434	96.682	-0.12142
3.47933	51.2351	12.2954	-1.54615	96.67	-0.121563
3.48767	51.3149	12.2939	-1.5479	96.658	-0.1217
3.496	51.3966	12.2923	-1.5496	96.6458	-0.121834
3.50433	51.4733	12.2908	-1.55128	96.6336	-0.121966
3.51267	51.5549	12.2892	-1.55293	96.6215	-0.122096
3.521	51.6285	12.2877	-1.55458	96.6095	-0.122226
3.52933	51.7066	12.2861	-1.55623	96.5971	-0.122355
3.53767	51.7829	12.2845	-1.55783	96.5848	-0.122481
3.546	51.8613	12.283	-1.55941	96.5727	-0.122605
3.55433	51.9413	12.2815	-1.56093	96.5606	-0.122725
3.56267	52.0251	12.2799	-1.56247	96.5485	-0.122846
3.571	52.1081	12.2784	-1.56401	96.5363	-0.122967
3.57933	52.1811	12.2768	-1.56553	96.5242	-0.123086
3.58767	52.2649	12.2753	-1.56704	96.5124	-0.123206
3.596	52.3409	12.2738	-1.56849	96.5002	-0.123319
3.60433	52.4192	12.2723	-1.56995	96.4883	-0.123434
3.61267	52.5037	12.2707	-1.5714	96.4762	-0.123548
3.621	52.5823	12.2692	-1.57283	96.4643	-0.123661
3.62933	52.6597	12.2677	-1.57427	96.4523	-0.123774
3.63767	52.7427	12.2662	-1.57571	96.4404	-0.123887
3.646	52.8231	12.2647	-1.57708	96.4284	-0.123995
3.65433	52.8991	12.2631	-1.57845	96.4164	-0.124102
3.66267	52.9746	12.2616	-1.57979	96.4045	-0.124208
3.671	53.0543	12.2601	-1.58112	96.3924	-0.124313
3.67933	53.1325	12.2586	-1.58245	96.3806	-0.124417
3.68767	53.2088	12.257	-1.58374	96.3686	-0.124518
3.696	53.2894	12.2556	-1.585	96.3568	-0.124617
3.70433	53.3664	12.2541	-1.58624	96.3451	-0.124715
3.71267	53.4467	12.2526	-1.58741	96.3333	-0.124807
3.721	53.5239	12.251	-1.58859	96.3213	-0.1249
3.72933	53.6064	12.2495	-1.58977	96.3094	-0.124993
3.73767	53.6817	12.248	-1.59093	96.2976	-0.125084
3.746	53.763	12.2465	-1.59208	96.2855	-0.125174
3.75433	53.8388	12.245	-1.59321	96.2738	-0.125263
3.76267	53.9152	12.2435	-1.59435	96.2621	-0.125353
3.771	53.9967	12.242	-1.59546	96.2503	-0.12544
3.77933	54.0738	12.2405	-1.59655	96.2384	-0.125526
3.78767	54.1527	12.239	-1.5976	96.2265	-0.125608
3.796	54.2342	12.2375	-1.5987	96.2147	-0.125694
3.80433	54.3131	12.236	-1.59975	96.2031	-0.125777
3.81267	54.388	12.2345	-1.60075	96.1915	-0.125856
3.821	54.4701	12.233	-1.60176	96.1796	-0.125935
3.82933	54.5485	12.2316	-1.60273	96.1682	-0.126012
3.83767	54.6236	12.2301	-1.60367	96.1564	-0.126085
3.846	54.7027	12.2286	-1.60459	96.1447	-0.126158
3.85433	54.7814	12.2271	-1.60549	96.1332	-0.126228
3.86267	54.861	12.2256	-1.60638	96.1215	-0.126298
3.871	54.9372	12.2242	-1.60728	96.11	-0.126369
3.87933	55.0138	12.2227	-1.60812	96.0983	-0.126435
3.88767	55.0962	12.2212	-1.60895	96.0866	-0.1265
3.896	55.1776	12.2197	-1.60981	96.075	-0.126568
3.90433	55.2563	12.2182	-1.61063	96.0635	-0.126632
3.91267	55.3344	12.2168	-1.61145	96.0521	-0.126697
3.921	55.4136	12.2153	-1.61226	96.0405	-0.126761
3.92933	55.4882	12.2138	-1.61303	96.0288	-0.126822
3.93767	55.5677	12.2124	-1.61381	96.0174	-0.126883
3.946	55.6496	12.2109	-1.61455	96.0059	-0.126941
3.95433	55.7266	12.2095	-1.6153	95.9943	-0.127
3.96267	55.8027	12.208	-1.61605	95.9829	-0.127059
3.971	55.8801	12.2066	-1.61679	95.9718	-0.127117
3.97933	55.9652	12.2051	-1.61747	95.9605	-0.12717
3.98767	56.0407	12.2037	-1.61815	95.9489	-0.127224
3.996	56.1216	12.2022	-1.61879	95.9372	-0.127274
4.00433	56.1971	12.2007	-1.61942	95.9258	-0.127323
4.01267	56.2747	12.1993	-1.62004	95.9145	-0.127372
4.021	56.347	12.1978	-1.62065	95.9029	-0.12742
4.02933	56.4332	12.1964	-1.62127	95.8916	-0.127469
4.03767	56.5077	12.195	-1.62186	95.8804	-0.127516
4.046	56.5888	12.1935	-1.62247	95.869	-0.127563
4.05433	56.6692	12.192	-1.62301	95.8574	-0.127606
4.06267	56.745	12.1906	-1.62357	95.8458	-0.12765
4.071	56.819	12.1891	-1.62411	95.8346	-0.127693
4.07933	56.9044	12.1877	-1.62464	95.8233	-0.127734
4.08767	56.9784	12.1862	-1.62519	95.8118	-0.127778
4.096	57.0586	12.1848	-1.62574	95.8006	-0.127821
4.10433	57.1402	12.1834	-1.62621	95.7895	-0.127857
4.11267	57.2149	12.1819	-1.62669	95.778	-0.127895
4.121	57.2932	12.1805	-1.62713	95.7666	-0.12793
4.12933	57.3732	12.1791	-1.62754	95.7553	-0.127962
4.13767	57.4547	12.1776	-1.62797	95.7441	-0.127996
4.146	57.5311	12.1762	-1.62839	95.7331	-0.128029
4.15433	57.6097	12.1748	-1.62877	95.722	-0.128059
4.16267	57.6907	12.1734	-1.62916	95.7111	-0.128089
4.171	57.7712	12.172	-1.62952	95.7001	-0.128118
4.17933	57.8458	12.1706	-1.62985	95.689	-0.128144
4.18767	57.9253	12.1692	-1.63021	95.6779	-0.128172
4.196	58.0002	12.1678	-1.63053	95.667	-0.128197
4.20433	58.0822	12.1664	-1.63085	95.6561	-0.128222
4.21267	58.1619	12.165	-1.63116	95.6452	-0.128246
4.221	58.2418	12.1637	-1.63143	95.6342	-0.128268
4.22933	58.3158	12.1622	-1.63171	95.6231	-0.12829
4.23767	58.3956	12.1608	-1.63198	95.6121	-0.128311
4.246	58.4816	12.1594	-1.63223	95.6009	-0.128331
4.25433	58.5579	12.158	-1.63244	95.5899	-0.128347
4.26267	58.6329	12.1566	-1.63261	95.5788	-0.128361
4.271	58.712	12.1552	-1.6328	95.5679	-0.128375
4.27933	58.789	12.1538	-1.63301	95.5571	-0.128392
4.28767	58.8704	12.1525	-1.63318	95.5462	-0.128405
4.296	58.9476	12.1511	-1.63334	95.5356	-0.128418
4.30433	59.0299	12.1497	-1.63353	95.5249	-0.128433
4.31267	59.1076	12.1484	-1.63371	95.5142	-0.128447
4.321	59.1863	12.147	-1.63382	95.5036	-0.128456
4.32933	59.2655	12.1457	-1.63394	95.493	-0.128465
4.33767	59.341	12.1443	-1.63408	95.4823	-0.128477
4.346	59.4214	12.143	-1.63422	95.4716	-0.128488
4.35433	59.5039	12.1416	-1.63434	95.4609	-0.128497
4.36267	59.5869	12.1402	-1.63442	95.4502	-0.128503
4.371	59.6629	12.1389	-1.63449	95.4394	-0.128508
4.37933	59.7434	12.1375	-1.63459	95.4285	-0.128516
4.38767	59.8264	12.1361	-1.63463	95.4176	-0.128519
4.396	59.9049	12.1347	-1.63462	95.4069	-0.128519
4.40433	59.9806	12.1334	-1.63468	95.3962	-0.128523
4.41267	60.0576	12.132	-1.63472	95.3856	-0.128527
4.421	60.1412	12.1307	-1.6347	95.3752	-0.128525
4.42933	60.2149	12.1294	-1.6347	95.3645	-0.128525
4.43767	60.2997	12.128	-1.63466	95.354	-0.128522
4.446	60.3744	12.1267	-1.63463	95.3436	-0.12852
4.45433	60.4563	12.1253	-1.6346	95.3331	-0.128517
4.46267	60.538	12.124	-1.63451	95.3226	-0.12851
4.471	60.6167	12.1227	-1.63444	95.3123	-0.128504
4.47933	60.6894	12.1214	-1.6344	95.3018	-0.128501
4.48767	60.7668	12.12	-1.63433	95.2913	-0.128496
4.496	60.8521	12.1187	-1.63425	95.281	-0.128489
4.50433	60.9297	12.1174	-1.63416	95.2704	-0.128482
4.51267	61.0099	12.1161	-1.63407	95.2601	-0.128476
4.521	61.0901	12.1148	-1.63398	95.2498	-0.128468
4.52933	61.1697	12.1134	-1.63384	95.2392	-0.128457
4.53767	61.2491	12.1121	-1.63373	95.2288	-0.128448
4.546	61.3292	12.1108	-1.63362	95.2186	-0.12844
4.55433	61.4079	12.1095	-1.63351	95.2083	-0.128431
4.56267	61.4935	12.1082	-1.63336	95.1979	-0.128419
4.571	61.5708	12.1068	-1.6332	95.1875	-0.128407
4.57933	61.6501	12.1055	-1.63305	95.177	-0.128396
4.58767	61.734	12.1042	-1.63291	95.1669	-0.128384
4.596	61.8171	12.1029	-1.6327	95.1568	-0.128368
4.60433	61.8908	12.1016	-1.63252	95.1463	-0.128354
4.61267	61.9684	12.1003	-1.63233	95.1362	-0.128338
4.621	62.0496	12.099	-1.63207	95.1259	-0.128319
4.62933	62.1292	12.0977	-1.63183	95.1156	-0.128299
4.63767	62.2123	12.0964	-1.63156	95.1056	-0.128278
4.646	62.2895	12.0951	-1.63129	95.0955	-0.128257
4.65433	62.3682	12.0938	-1.63102	95.0854	-0.128235
4.66267	62.4473	12.0926	-1.63074	95.0755	-0.128213
4.671	62.5288	12.0913	-1.63042	95.0655	-0.128188
4.67933	62.6077	12.09	-1.63011	95.0554	-0.128164
4.68767	62.6868	12.0888	-1.62976	95.0457	-0.128137
4.696	62.7658	12.0875	-1.62947	95.0358	-0.128114
4.70433	62.8498	12.0863	-1.62918	95.0261	-0.128091
4.71267	62.9314	12.085	-1.62886	95.0162	-0.128066
4.721	63.0082	12.0838	-1.6285	95.0062	-0.128038
4.72933	63.0879	12.0825	-1.62816	94.9962	-0.128011
4.73767	63.1689	12.0812	-1.62783	94.9863	-0.127985
4.746	63.2457	12.08	-1.62745	94.9763	-0.127955
4.75433	63.3286	12.0787	-1.62711	94.9663	-0.127928
4.76267	63.4072	12.0774	-1.62677	94.9564	-0.127902
4.771	63.4915	12.0762	-1.62647	94.9463	-0.127878
4.77933	63.5735	12.0748	-1.6261	94.9361	-0.127849
4.78767	63.6515	12.0736	-1.62574	94.9259	-0.127821
4.796	63.7342	12.0723	-1.62537	94.9159	-0.127792
4.80433	63.8175	12.071	-1.62503	94.9062	-0.127765
4.81267	63.8963	12.0698	-1.62468	94.8964	-0.127737
4.821	63.9779	12.0685	-1.62427	94.8864	-0.127705
4.82933	64.052	12.0673	-1.62381	94.8765	-0.127669
4.83767	64.1347	12.066	-1.6234	94.8665	-0.127637
4.846	64.2116	12.0647	-1.62297	94.8565	-0.127603
4.85433	64.2975	12.0635	-1.62254	94.8469	-0.127569
4.86267	64.3762	12.0623	-1.62212	94.8374	-0.127536
4.871	64.4552	12.061	-1.62169	94.8275	-0.127502
4.87933	64.5422	12.0598	-1.62129	94.8177	-0.127471
4.88767	64.6192	12.0585	-1.62085	94.8078	-0.127436
4.896	64.6988	12.0573	-1.62045	94.7979	-0.127405
4.90433	64.7828	12.0561	-1.62005	94.7884	-0.127373
4.91267	64.8627	12.0549	-1.61972	94.7789	-0.127347
4.921	64.9426	12.0536	-1.61929	94.7691	-0.127314
4.92933	65.0198	12.0524	-1.61889	94.7593	-0.127282
4.93767	65.1081	12.0511	-1.61848	94.7493	-0.12725
4.946	65.1865	12.0498	-1.61809	94.7393	-0.127219
4.95433	65.2687	12.0486	-1.61766	94.7296	-0.127185
4.96267	65.3451	12.0473	-1.61723	94.7198	-0.127152
4.971	65.4312	12.0461	-1.61683	94.71	-0.12712
4.97933	65.5102	12.0449	-1.61636	94.7003	-0.127083
4.98767	65.5883	12.0436	-1.61593	94.6907	-0.127049
4.996	65.67	12.0424	-1.6155	94.6808	-0.127016
5.00433	65.7509	12.0412	-1.61512	94.6711	-0.126986
5.01267	65.8356	12.0399	-1.61471	94.6613	-0.126953
5.021	65.9146	12.0387	-1.61429	94.6517	-0.12692
5.02933	65.9962	12.0375	-1.61387	94.6421	-0.126887
5.03767	66.0741	12.0363	-1.61349	94.6327	-0.126857
5.046	66.1581	12.0351	-1.61305	94.6234	-0.126823
5.05433	66.2398	12.0339	-1.61264	94.6138	-0.12679
5.06267	66.3204	12.0326	-1.61224	94.6041	-0.126759
5.071	66.4058	12.0314	-1.61185	94.5944	-0.126728
5.07933	66.4847	12.0302	-1.61143	94.5847	-0.126695
5.08767	66.5656	12.0289	-1.61101	94.5748	-0.126663
5.096	66.6437	12.0277	-1.61065	94.5651	-0.126634
5.10433	66.7254	12.0265	-1.6103	94.5555	-0.126607
5.11267	66.8085	12.0252	-1.60994	94.5459	-0.126579
5.121	66.8925	12.024	-1.60957	94.5361	-0.126549
5.12933	66.9734	12.0227	-1.60923	94.5263	-0.126523
5.13767	67.0524	12.0215	-1.60891	94.5164	-0.126498
5.146	67.1365	12.0202	-1.60857	94.5065	-0.126471
5.15433	67.2178	12.019	-1.60824	94.4969	-0.126444
5.16267	67.2989	12.0177	-1.60797	94.4871	-0.126424
5.171	67.3767	12.0165	-1.60773	94.4773	-0.126404
5.17933	67.4596	12.0153	-1.60744	94.4675	-0.126382
5.18767	67.54	12.014	-1.60716	94.4576	-0.12636
5.196	67.6218	12.0127	-1.6069	94.4476	-0.126339
5.20433	67.7047	12.0115	-1.60667	94.438	-0.126321
5.21267	67.7877	12.0102	-1.60646	94.428	-0.126304
5.221	67.8728	12.009	-1.60623	94.4182	-0.126286
5.22933	67.9518	12.0077	-1.60606	94.4084	-0.126273
5.23767	68.041	12.0065	-1.60587	94.3983	-0.126258
5.246	68.1105	12.0052	-1.60566	94.3888	-0.126242
5.25433	68.1991	12.004	-1.60546	94.3789	-0.126226
5.26267	68.281	12.0027	-1.60534	94.3691	-0.126216
5.271	68.3628	12.0015	-1.60515	94.359	-0.126202
5.27933	68.4383	12.0002	-1.60498	94.3491	-0.126188
5.28767	68.5225	11.9989	-1.60479	94.3391	-0.126174
5.296	68.6052	11.9977	-1.60467	94.3291	-0.126164
5.30433	68.6891	11.9964	-1.60456	94.3191	-0.126155
5.31267	68.7705	11.9951	-1.60443	94.3092	-0.126145
5.321	68.8496	11.9939	-1.60431	94.2992	-0.126135
5.32933	68.936	11.9925	-1.60421	94.289	-0.126128
5.33767	69.0165	11.9913	-1.60413	94.2791	-0.126122
5.346	69.1	11.99	-1.60405	94.269	-0.126115
5.35433	69.1799	11.9888	-1.60403	94.2592	-0.126114
5.36267	69.2621	11.9875	-1.60402	94.2494	-0.126113
5.371	69.3413	11.9862	-1.60405	94.2392	-0.126115
5.37933	69.4274	11.9849	-1.60403	94.2292	-0.126114
5.38767	69.5047	11.9837	-1.60403	94.219	-0.126114
5.396	69.5845	11.9824	-1.60407	94.2088	-0.126116
5.40433	69.6688	11.9811	-1.60411	94.1986	-0.12612
5.41267	69.7514	11.9798	-1.60415	94.1887	-0.126123
5.421	69.8309	11.9785	-1.60419	94.1787	-0.126126
5.42933	69.9129	11.9773	-1.60423	94.1688	-0.126129
5.43767	69.9936	11.976	-1.60425	94.1585	-0.126131
5.446	70.0794	11.9747	-1.60431	94.1482	-0.126136
5.45433	70.1616	11.9733	-1.60437	94.138	-0.12614
5.46267	70.2405	11.972	-1.60449	94.1278	-0.12615
5.471	70.3223	11.9708	-1.60462	94.1177	-0.12616
5.47933	70.4048	11.9695	-1.60476	94.1075	-0.126171
5.48767	70.4855	11.9681	-1.60493	94.0971	-0.126184
5.496	70.5673	11.9668	-1.60508	94.0867	-0.126196
5.50433	70.6517	11.9655	-1.60525	94.076	-0.126209
5.51267	70.7309	11.9641	-1.60541	94.0656	-0.126222
5.521	70.8112	11.9628	-1.60563	94.0554	-0.126239
5.52933	70.8963	11.9615	-1.60586	94.0452	-0.126258
5.53767	70.9823	11.9602	-1.60611	94.0348	-0.126277
5.546	71.0666	11.9589	-1.60634	94.0244	-0.126295
5.55433	71.1447	11.9576	-1.60656	94.014	-0.126313
5.56267	71.2233	11.9562	-1.60681	94.0035	-0.126332
5.571	71.3083	11.9549	-1.60709	93.9928	-0.126355
5.57933	71.3905	11.9535	-1.60739	93.9823	-0.126377
5.58767	71.4704	11.9522	-1.60772	93.9719	-0.126403
5.596	71.5544	11.9509	-1.60806	93.9614	-0.126431
5.60433	71.6411	11.9495	-1.60839	93.9506	-0.126457
5.61267	71.7184	11.9482	-1.60871	93.94	-0.126482
5.621	71.7985	11.9468	-1.60907	93.9294	-0.12651
5.62933	71.8825	11.9454	-1.60944	93.9186	-0.126539
5.63767	71.9624	11.9441	-1.60981	93.9079	-0.126568
5.646	72.0446	11.9427	-1.61017	93.8974	-0.126597
5.65433	72.1252	11.9414	-1.61052	93.8869	-0.126624
5.66267	72.2091	11.9401	-1.6109	93.8767	-0.126654
5.671	72.2913	11.9388	-1.61123	93.8663	-0.12668
5.67933	72.3717	11.9375	-1.6116	93.8559	-0.126709
5.68767	72.4521	11.9361	-1.61198	93.8452	-0.126739
5.696	72.54	11.9348	-1.61241	93.8346	-0.126772
5.70433	72.6197	11.9334	-1.61282	93.8239	-0.126804
5.71267	72.7041	11.9321	-1.61322	93.8133	-0.126836
5.721	72.7833	11.9307	-1.61366	93.8029	-0.12687
5.72933	72.8667	11.9294	-1.61406	93.7922	-0.126902
5.73767	72.9475	11.928	-1.6145	93.7816	-0.126936
5.746	73.0312	11.9266	-1.61494	93.7705	-0.126972
5.75433	73.1072	11.9252	-1.61545	93.7597	-0.127012
5.76267	73.1938	11.9238	-1.61595	93.7488	-0.127051
5.771	73.2741	11.9225	-1.61646	93.7381	-0.127091
5.77933	73.3592	11.9211	-1.61693	93.7274	-0.127128
5.78767	73.438	11.9198	-1.61738	93.7168	-0.127163
5.796	73.5194	11.9184	-1.61787	93.7061	-0.127202
5.80433	73.6042	11.917	-1.61837	93.6951	-0.127241
5.81267	73.6876	11.9157	-1.61891	93.6845	-0.127283
5.821	73.7706	11.9143	-1.61942	93.6739	-0.127324
5.82933	73.8513	11.913	-1.61992	93.6633	-0.127363
5.83767	73.9336	11.9116	-1.62045	93.6524	-0.127405
5.846	74.0172	11.9102	-1.62098	93.6416	-0.127446
5.85433	74.0983	11.9088	-1.62149	93.6308	-0.127487
5.86267	74.1835	11.9075	-1.62201	93.62	-0.127527
5.871	74.2634	11.9061	-1.62259	93.6091	-0.127573
5.87933	74.3453	11.9047	-1.62314	93.5981	-0.127616
5.88767	74.43	11.9033	-1.62367	93.5872	-0.127658
5.896	74.5118	11.9019	-1.62425	93.5763	-0.127703
5.90433	74.5914	11.9005	-1.62483	93.5653	-0.127749
5.91267	74.6742	11.8991	-1.62541	93.5542	-0.127795
5.921	74.7568	11.8977	-1.62598	93.5432	-0.12784
5.92933	74.8419	11.8963	-1.62655	93.5319	-0.127884
5.93767	74.9229	11.8948	-1.62711	93.5207	-0.127929
5.946	75.0052	11.8934	-1.62774	93.5097	-0.127978
5.95433	75.0833	11.892	-1.62831	93.4987	-0.128023
5.96267	75.1662	11.8906	-1.62888	93.4877	-0.128068
5.971	75.2515	11.8892	-1.62947	93.4767	-0.128114
5.97933	75.335	11.8878	-1.63001	93.4657	-0.128156
5.98767	75.4176	11.8864	-1.63058	93.4546	-0.128201
5.996	75.5012	11.885	-1.63113	93.4435	-0.128245
6.00433	75.582	11.8836	-1.63169	93.4325	-0.128288
6.01267	75.6657	11.8822	-1.63224	93.4216	-0.128331
6.021	75.7446	11.8809	-1.63284	93.4108	-0.128379
6.02933	75.8304	11.8795	-1.63342	93.3999	-0.128425
6.03767	75.9144	11.878	-1.63403	93.3888	-0.128473
6.046	75.9989	11.8766	-1.63465	93.3776	-0.128521
6.05433	76.0812	11.8752	-1.63526	93.3665	-0.128569
6.06267	76.1565	11.8738	-1.63588	93.3551	-0.128618
6.071	76.2463	11.8724	-1.63647	93.3441	-0.128664
6.07933	76.3203	11.871	-1.63711	93.333	-0.128714
6.08767	76.4101	11.8696	-1.63771	93.3221	-0.128762
6.096	76.4891	11.8682	-1.63836	93.3111	-0.128813
6.10433	76.5734	11.8667	-1.63897	93.2998	-0.128861
6.11267	76.6563	11.8653	-1.63957	93.2885	-0.128908
6.121	76.7404	11.8639	-1.64013	93.2773	-0.128951
6.12933	76.8215	11.8625	-1.64069	93.2661	-0.128996
6.13767	76.9006	11.861	-1.6413	93.2549	-0.129044
6.146	76.9833	11.8596	-1.64194	93.2439	-0.129095
6.15433	77.0644	11.8582	-1.64261	93.2327	-0.129147
6.16267	77.1524	11.8568	-1.64322	93.2215	-0.129194
6.171	77.2355	11.8553	-1.64382	93.2103	-0.129242
6.17933	77.3172	11.8539	-1.64438	93.199	-0.129286
6.18767	77.3997	11.8525	-1.64499	93.1878	-0.129334
6.196	77.4793	11.8511	-1.64559	93.1765	-0.129381
6.20433	77.5625	11.8497	-1.64624	93.1655	-0.129433
6.21267	77.6417	11.8482	-1.64691	93.1543	-0.129485
6.221	77.7264	11.8468	-1.64755	93.143	-0.129536
6.22933	77.8081	11.8453	-1.64816	93.1314	-0.129584
6.23767	77.8913	11.8439	-1.64877	93.12	-0.129631
6.246	77.9711	11.8424	-1.64942	93.1087	-0.129682
6.25433	78.0564	11.841	-1.65009	93.0974	-0.129735
6.26267	78.1428	11.8395	-1.65074	93.0861	-0.129786
6.271	78.225	11.8381	-1.65137	93.0747	-0.129835
6.27933	78.31	11.8367	-1.65201	93.0633	-0.129886
6.28767	78.3903	11.8352	-1.65262	93.0518	-0.129934
6.296	78.475	11.8337	-1.65319	93.0401	-0.129978
6.30433	78.5547	11.8323	-1.65379	93.0287	-0.130026
6.31267	78.6407	11.8308	-1.65438	93.0173	-0.130072
6.321	78.7178	11.8294	-1.65499	93.0061	-0.13012
6.32933	78.8069	11.8279	-1.65559	92.9949	-0.130167
6.33767	78.8898	11.8265	-1.65618	92.9833	-0.130214
6.346	78.9718	11.825	-1.65684	92.9716	-0.130266
6.35433	79.0527	11.8235	-1.65746	92.96	-0.130315
6.36267	79.1362	11.8221	-1.65807	92.9485	-0.130363
6.371	79.2167	11.8206	-1.65872	92.9371	-0.130413
6.37933	79.2995	11.8192	-1.65941	92.9259	-0.130468
6.38767	79.3816	11.8178	-1.66001	92.9147	-0.130515
6.396	79.4639	11.8163	-1.66065	92.9034	-0.130565
6.40433	79.5451	11.8148	-1.6613	92.8918	-0.130616
6.41267	79.6331	11.8134	-1.66191	92.8803	-0.130664
6.421	79.7092	11.8119	-1.66257	92.8687	-0.130716
6.42933	79.7951	11.8105	-1.66317	92.8574	-0.130763
6.43767	79.8791	11.809	-1.66378	92.846	-0.130811
6.446	79.9644	11.8076	-1.66443	92.8346	-0.130862
6.45433	80.0432	11.8061	-1.66507	92.8232	-0.130912
6.46267	80.1311	11.8047	-1.66566	92.8117	-0.13096
6.471	80.2097	11.8032	-1.66635	92.8002	-0.131014
6.47933	80.2887	11.8017	-1.66697	92.7885	-0.131062
6.48767	80.3776	11.8003	-1.66761	92.7771	-0.131112
6.496	80.4608	11.7988	-1.66827	92.7657	-0.131164
6.50433	80.5467	11.7974	-1.6689	92.7545	-0.131214
6.51267	80.626	11.7959	-1.66955	92.743	-0.131265
6.521	80.709	11.7944	-1.67019	92.7313	-0.131315
6.52933	80.7941	11.793	-1.67084	92.7197	-0.131366
6.53767	80.8763	11.7915	-1.67143	92.708	-0.131413
6.546	80.9609	11.79	-1.67203	92.6962	-0.13146
6.55433	81.0446	11.7885	-1.6726	92.6847	-0.131504
6.56267	81.1268	11.787	-1.67324	92.6731	-0.131555
6.571	81.2073	11.7856	-1.67385	92.6615	-0.131603
6.57933	81.2939	11.7841	-1.67445	92.6498	-0.131651
6.58767	81.3689	11.7826	-1.67506	92.638	-0.131698
6.596	81.4575	11.7811	-1.67568	92.6263	-0.131747
6.60433	81.5372	11.7796	-1.67632	92.6148	-0.131798
6.61267	81.6168	11.7781	-1.67688	92.6032	-0.131841
6.621	81.6994	11.7767	-1.67753	92.5918	-0.131892
6.62933	81.7817	11.7752	-1.67813	92.5804	-0.131939
6.63767	81.8663	11.7737	-1.67872	92.5686	-0.131986
6.646	81.9435	11.7723	-1.67927	92.557	-0.132029
6.65433	82.0291	11.7708	-1.67984	92.5454	-0.132074
6.66267	82.1145	11.7693	-1.68041	92.5339	-0.132119
6.671	82.2014	11.7679	-1.68098	92.5224	-0.132163
6.67933	82.2832	11.7664	-1.68154	92.511	-0.132208
6.68767	82.3662	11.7649	-1.68205	92.4994	-0.132248
6.696	82.4461	11.7635	-1.68262	92.4878	-0.132292
6.70433	82.53	11.762	-1.68315	92.4763	-0.132334
6.71267	82.6118	11.7605	-1.68372	92.4647	-0.132379
6.721	82.6984	11.759	-1.68427	92.453	-0.132422
6.72933	82.7762	11.7576	-1.68482	92.4416	-0.132466
6.73767	82.8608	11.7561	-1.68535	92.4299	-0.132508
6.746	82.9374	11.7547	-1.68587	92.4186	-0.132548
6.75433	83.0235	11.7532	-1.68636	92.4071	-0.132587
6.76267	83.1084	11.7517	-1.68684	92.3955	-0.132624
6.771	83.1941	11.7503	-1.68733	92.384	-0.132663
6.77933	83.273	11.7488	-1.68781	92.3724	-0.1327
6.78767	83.3575	11.7473	-1.68826	92.361	-0.132736
6.796	83.4409	11.7459	-1.68868	92.3497	-0.132769
6.80433	83.5242	11.7444	-1.68912	92.3383	-0.132803
6.81267	83.604	11.743	-1.68954	92.3266	-0.132837
6.821	83.6908	11.7415	-1.68997	92.3154	-0.13287
6.82933	83.7792	11.74	-1.69037	92.3037	-0.132902
6.83767	83.86	11.7386	-1.69076	92.2922	-0.132932
6.846	83.9408	11.7371	-1.69113	92.2806	-0.132961
6.85433	84.0244	11.7357	-1.69151	92.2692	-0.132992
6.86267	84.1076	11.7342	-1.69187	92.258	-0.13302
6.871	84.1878	11.7327	-1.6922	92.2463	-0.133046
6.87933	84.2723	11.7313	-1.69252	92.2347	-0.133071
6.88767	84.356	11.7298	-1.69284	92.2234	-0.133096
6.896	84.4414	11.7284	-1.69313	92.2119	-0.133119
6.90433	84.5226	11.7269	-1.6934	92.2002	-0.13314
6.91267	84.603	11.7254	-1.69368	92.1887	-0.133162
6.921	84.6903	11.724	-1.69395	92.1774	-0.133183
6.92933	84.7718	11.7225	-1.69422	92.1661	-0.133205
6.93767	84.8535	11.7211	-1.69444	92.1547	-0.133222
6.946	84.9388	11.7196	-1.69462	92.1433	-0.133236
6.95433	85.0211	11.7182	-1.69484	92.1319	-0.133254
6.96267	85.1061	11.7167	-1.69505	92.1206	-0.13327
6.971	85.1897	11.7153	-1.69523	92.1092	-0.133284
6.97933	85.2727	11.7139	-1.69539	92.0981	-0.133297
6.98767	85.3534	11.7125	-1.69555	92.087	-0.133309
6.996	85.4398	11.7111	-1.69566	92.0758	-0.133318
7.00433	85.5239	11.7096	-1.69578	92.0645	-0.133328
7.01267	85.6025	11.7082	-1.69588	92.0533	-0.133335
7.021	85.6836	11.7068	-1.69598	92.0422	-0.133343
7.02933	85.7733	11.7054	-1.69608	92.0311	-0.133351
7.03767	85.8591	11.704	-1.69614	92.0202	-0.133356
7.046	85.9334	11.7026	-1.69617	92.0092	-0.133358
7.05433	86.02	11.7012	-1.69621	91.9981	-0.133361
7.06267	86.105	11.6998	-1.69618	91.9871	-0.133359
7.071	86.184	11.6984	-1.69612	91.9761	-0.133354
7.07933	86.267	11.697	-1.69605	91.965	-0.133348
7.08767	86.3529	11.6956	-1.69593	91.954	-0.133339
7.096	86.4386	11.6942	-1.69581	91.9432	-0.13333
7.10433	86.5224	11.6928	-1.69564	91.9323	-0.133316
7.11267	86.6065	11.6914	-1.69544	91.9216	-0.133301
7.121	86.6898	11.6901	-1.69524	91.9107	-0.133285
7.12933	86.7712	11.6887	-1.69505	91.8998	-0.13327
7.13767	86.8567	11.6873	-1.69481	91.8891	-0.133251
7.146	86.9423	11.686	-1.69459	91.8785	-0.133234
7.15433	87.0282	11.6846	-1.69431	91.868	-0.133211
7.16267	87.1097	11.6833	-1.69404	91.8574	-0.133191
7.171	87.1957	11.6819	-1.69374	91.8469	-0.133167
7.17933	87.2761	11.6806	-1.69337	91.8362	-0.133138
7.18767	87.3602	11.6792	-1.69302	91.8257	-0.13311
7.196	87.4433	11.6779	-1.69264	91.8153	-0.133081
7.20433	87.5234	11.6766	-1.69225	91.8049	-0.13305
7.21267	87.6063	11.6753	-1.69181	91.7945	-0.133015
7.221	87.6923	11.674	-1.69134	91.7841	-0.132978
7.22933	87.7755	11.6726	-1.6908	91.7738	-0.132936
7.23767	87.8592	11.6713	-1.69027	91.7632	-0.132894
7.246	87.9472	11.67	-1.68969	91.7528	-0.132849
7.25433	88.0341	11.6687	-1.68914	91.7427	-0.132805
7.26267	88.116	11.6674	-1.68854	91.7326	-0.132758
7.271	88.2027	11.6661	-1.6879	91.7225	-0.132708
7.27933	88.2868	11.6648	-1.68727	91.7121	-0.132658
7.28767	88.3729	11.6635	-1.68656	91.7021	-0.132603
7.296	88.4515	11.6623	-1.68585	91.6921	-0.132547
7.30433	88.5404	11.661	-1.68514	91.6819	-0.132491
7.31267	88.622	11.6597	-1.68443	91.6718	-0.132435
7.321	88.7071	11.6584	-1.68368	91.6618	-0.132376
7.32933	88.7898	11.6571	-1.68288	91.6518	-0.132313
7.33767	88.8742	11.6559	-1.68202	91.6418	-0.132246
7.346	88.9579	11.6546	-1.68119	91.6318	-0.13218
7.35433	89.0367	11.6533	-1.68036	91.6218	-0.132115
7.36267	89.1255	11.6521	-1.67948	91.612	-0.132045
7.371	89.2093	11.6508	-1.67857	91.6019	-0.131974
7.37933	89.2924	11.6495	-1.67761	91.592	-0.131899
7.38767	89.3757	11.6483	-1.67665	91.5824	-0.131823
7.396	89.4612	11.6471	-1.67564	91.573	-0.131744
7.40433	89.5457	11.6459	-1.67461	91.5634	-0.131663
7.41267	89.632	11.6447	-1.67358	91.554	-0.131582
7.421	89.7167	11.6435	-1.6725	91.5445	-0.131497
7.42933	89.795	11.6423	-1.67138	91.535	-0.131408
7.43767	89.877	11.6411	-1.67024	91.5255	-0.131319
7.446	89.9682	11.6399	-1.66908	91.5161	-0.131228
7.45433	90.0487	11.6387	-1.6679	91.507	-0.131135
7.46267	90.1306	11.6375	-1.66672	91.4978	-0.131043
7.471	90.2175	11.6363	-1.6655	91.4884	-0.130946
7.47933	90.3054	11.6351	-1.66425	91.479	-0.130848
7.48767	90.3899	11.634	-1.66303	91.4696	-0.130752
7.496	90.4684	11.6328	-1.66177	91.4604	-0.130653
7.50433	90.558	11.6316	-1.66048	91.4512	-0.130552
7.51267	90.643	11.6305	-1.65923	91.4421	-0.130454
7.521	90.7224	11.6293	-1.65792	91.4332	-0.130351
7.52933	90.8113	11.6282	-1.65657	91.4242	-0.130244
7.53767	90.891	11.627	-1.65521	91.4152	-0.130138
7.546	90.9812	11.6259	-1.6538	91.4064	-0.130027
7.55433	91.0632	11.6248	-1.65237	91.3975	-0.129914
7.56267	91.1529	11.6236	-1.65096	91.3886	-0.129803
7.571	91.2337	11.6226	-1.64954	91.3799	-0.129692
7.57933	91.3156	11.6214	-1.64807	91.3712	-0.129576
7.58767	91.4008	11.6203	-1.64661	91.3625	-0.129461
7.596	91.4886	11.6192	-1.64512	91.3537	-0.129344
7.60433	91.5711	11.6181	-1.64362	91.3449	-0.129226
7.61267	91.659	11.617	-1.6421	91.3361	-0.129107
7.621	91.7372	11.6159	-1.6406	91.3275	-0.128989
7.62933	91.8253	11.6148	-1.63906	91.3188	-0.128868
7.63767	91.9091	11.6137	-1.63754	91.3104	-0.128748
7.646	91.9946	11.6127	-1.63597	91.3022	-0.128624
7.65433	92.076	11.6116	-1.63434	91.2936	-0.128497
7.66267	92.1613	11.6105	-1.63275	91.2852	-0.128372
7.671	92.246	11.6094	-1.63115	91.2769	-0.128246
7.67933	92.3307	11.6084	-1.6295	91.2685	-0.128116
7.68767	92.4216	11.6073	-1.62786	91.26	-0.127987
7.696	92.5001	11.6062	-1.62619	91.2516	-0.127856
7.70433	92.5827	11.6052	-1.6245	91.2431	-0.127723
7.71267	92.6697	11.6041	-1.62282	91.2348	-0.127591
7.721	92.7516	11.603	-1.62108	91.2263	-0.127454
7.72933	92.8356	11.602	-1.61934	91.2181	-0.127318
7.73767	92.9206	11.6009	-1.61762	91.2098	-0.127182
7.746	93.0071	11.5998	-1.61589	91.2015	-0.127046
7.75433	93.0905	11.5988	-1.61412	91.1933	-0.126907
7.76267	93.1759	11.5978	-1.61232	91.1852	-0.126765
7.771	93.2651	11.5968	-1.61052	91.1772	-0.126624
7.77933	93.3511	11.5958	-1.60878	91.1694	-0.126487
7.78767	93.4319	11.5947	-1.60701	91.1613	-0.126348
7.796	93.5173	11.5937	-1.60521	91.1531	-0.126206
7.80433	93.6026	11.5927	-1.60344	91.1451	-0.126067
7.81267	93.6899	11.5917	-1.60167	91.1371	-0.125928
7.821	93.7719	11.5907	-1.59987	91.1293	-0.125786
7.82933	93.8538	11.5897	-1.59804	91.1213	-0.125643
7.83767	93.9434	11.5887	-1.59623	91.1135	-0.1255
7.846	94.0243	11.5877	-1.59441	91.1055	-0.125357
7.85433	94.1059	11.5867	-1.5926	91.0978	-0.125215
7.86267	94.1947	11.5856	-1.59075	91.0898	-0.12507
7.871	94.2779	11.5847	-1.5889	91.0821	-0.124924
7.87933	94.3636	11.5837	-1.58707	91.0746	-0.12478
7.88767	94.4491	11.5827	-1.58523	91.0669	-0.124635
7.896	94.5358	11.5817	-1.58339	91.0592	-0.12449
7.90433	94.6249	11.5808	-1.58154	91.0514	-0.124345
7.91267	94.702	11.5798	-1.57969	91.0438	-0.1242
7.921	94.79	11.5788	-1.57785	91.0361	-0.124055
7.92933	94.8709	11.5779	-1.57602	91.0286	-0.123911
7.93767	94.9589	11.5769	-1.57413	91.0211	-0.123762
7.946	95.0417	11.576	-1.57222	91.0136	-0.123613
7.95433	95.128	11.575	-1.57038	91.0061	-0.123468
7.96267	95.2119	11.574	-1.56848	90.9983	-0.123319
7.971	95.2945	11.573	-1.56662	90.9904	-0.123172
7.97933	95.3818	11.5721	-1.56474	90.9829	-0.123025
7.98767	95.4708	11.5711	-1.56287	90.9753	-0.122877
7.996	95.5533	11.5701	-1.561	90.9679	-0.122731
8.00433	95.6387	11.5692	-1.5591	90.9606	-0.122581
8.01267	95.7225	11.5682	-1.55723	90.9529	-0.122434
8.021	95.807	11.5673	-1.55535	90.9453	-0.122286
8.02933	95.893	11.5663	-1.5535	90.9378	-0.122141
8.03767	95.9794	11.5654	-1.55161	90.9303	-0.121992
8.046	96.0614	11.5644	-1.54977	90.9228	-0.121848
8.05433	96.1464	11.5635	-1.54795	90.9156	-0.121704
8.06267	96.2323	11.5626	-1.54609	90.9084	-0.121558
8.071	96.3142	11.5616	-1.54423	90.901	-0.121412
8.07933	96.3979	11.5607	-1.54236	90.8935	-0.121265
8.08767	96.4873	11.5597	-1.54052	90.8862	-0.12112
8.096	96.5716	11.5588	-1.53868	90.879	-0.120975
8.10433	96.655	11.5579	-1.53683	90.8718	-0.12083
8.11267	96.7404	11.557	-1.53498	90.8646	-0.120685
8.121	96.8229	11.5561	-1.53313	90.8575	-0.12054
8.12933	96.9113	11.5552	-1.53129	90.8504	-0.120395
8.13767	96.9925	11.5543	-1.52942	90.843	-0.120248
8.146	97.0815	11.5533	-1.52757	90.8356	-0.120102
8.15433	97.1684	11.5524	-1.52573	90.8282	-0.119957
8.16267	97.2506	11.5515	-1.5239	90.821	-0.119814
8.171	97.3395	11.5505	-1.52208	90.8136	-0.11967
8.17933	97.4224	11.5496	-1.52025	90.8064	-0.119527
8.18767	97.5044	11.5487	-1.51846	90.7991	-0.119386
8.196	97.5892	11.5477	-1.51666	90.7916	-0.119245
8.20433	97.6779	11.5468	-1.51487	90.7844	-0.119104
8.21267	97.7573	11.5459	-1.51304	90.7772	-0.11896
8.221	97.8469	11.545	-1.51123	90.7701	-0.118817
8.22933	97.9293	11.5441	-1.50946	90.7629	-0.118679
8.23767	98.0154	11.5432	-1.50767	90.756	-0.118537
8.246	98.0986	11.5423	-1.50587	90.7491	-0.118396
8.25433	98.1863	11.5414	-1.50413	90.7421	-0.118259
8.26267	98.2721	11.5405	-1.50238	90.7351	-0.118122
8.271	98.3596	11.5396	-1.50061	90.7282	-0.117982
8.27933	98.4403	11.5388	-1.49884	90.7214	-0.117843
8.28767	98.5215	11.5379	-1.49708	90.7142	-0.117705
8.296	98.6088	11.537	-1.49533	90.7072	-0.117568
8.30433	98.6953	11.5361	-1.49361	90.7	-0.117432
8.31267	98.7775	11.5352	-1.49183	90.693	-0.117292
8.321	98.8644	11.5343	-1.49007	90.686	-0.117153
8.32933	98.9437	11.5334	-1.48832	90.6787	-0.117016
8.33767	99.0327	11.5324	-1.48656	90.6712	-0.116878
8.346	99.1186	11.5315	-1.48482	90.6641	-0.116741
8.35433	99.2041	11.5306	-1.48307	90.657	-0.116603
8.36267	99.2866	11.5297	-1.48132	90.6499	-0.116466
8.371	99.3724	11.5288	-1.47958	90.6432	-0.116329
8.37933	99.4524	11.528	-1.47789	90.6363	-0.116196
8.38767	99.5374	11.5271	-1.47616	90.6297	-0.11606
8.396	99.6242	11.5263	-1.47446	90.623	-0.115926
8.40433	99.7062	11.5254	-1.4728	90.6162	-0.115796
8.41267	99.7897	11.5246	-1.47115	90.6098	-0.115666
8.421	99.8772	11.5238	-1.46945	90.6035	-0.115533
8.42933	99.9626	11.5229	-1.46775	90.5969	-0.115399
8.43767	100.052	11.5221	-1.46611	90.5899	-0.11527
8.446	100.138	11.5212	-1.46449	90.5833	-0.115143
8.45433	100.22	11.5204	-1.46286	90.5767	-0.115014
8.46267	100.304	11.5196	-1.46122	90.5702	-0.114886
8.471	100.388	11.5187	-1.45956	90.5634	-0.114755
8.47933	100.47	11.5178	-1.45792	90.5567	-0.114626
8.48767	100.557	11.517	-1.45629	90.5501	-0.114498
8.496	100.646	11.5161	-1.45465	90.5432	-0.114369
8.50433	100.729	11.5153	-1.45302	90.5364	-0.114241
8.51267	100.813	11.5144	-1.45145	90.5298	-0.114117
8.521	100.897	11.5136	-1.44985	90.5232	-0.113991
8.52933	100.98	11.5127	-1.4482	90.5165	-0.113862
8.53767	101.066	11.5119	-1.44659	90.5098	-0.113736
8.546	101.151	11.511	-1.44495	90.5028	-0.113606
8.55433	101.234	11.5102	-1.44335	90.4964	-0.11348
8.56267	101.318	11.5093	-1.44175	90.4899	-0.113354
8.571	101.404	11.5085	-1.44015	90.4833	-0.113229
8.57933	101.484	11.5077	-1.43857	90.4767	-0.113105
8.58767	101.575	11.5068	-1.43698	90.4702	-0.11298
8.596	101.656	11.506	-1.43542	90.4637	-0.112857
8.60433	101.741	11.5052	-1.43387	90.4572	-0.112735
8.61267	101.825	11.5044	-1.4323	90.4508	-0.112611
8.621	101.909	11.5036	-1.43071	90.4443	-0.112487
8.62933	101.992	11.5027	-1.42916	90.4378	-0.112365
8.63767	102.078	11.5019	-1.42763	90.431	-0.112244
8.646	102.165	11.501	-1.42606	90.4242	-0.112121
8.65433	102.247	11.5001	-1.42449	90.4174	-0.111997
8.66267	102.336	11.4993	-1.42294	90.4109	-0.111876
8.671	102.418	11.4985	-1.42142	90.4045	-0.111756
8.67933	102.504	11.4976	-1.41984	90.3979	-0.111632
8.68767	102.587	11.4968	-1.41828	90.3914	-0.111509
8.696	102.675	11.496	-1.41679	90.3846	-0.111392
8.70433	102.757	11.4951	-1.41533	90.3779	-0.111277
8.71267	102.841	11.4943	-1.41383	90.3714	-0.111159
8.721	102.926	11.4934	-1.4123	90.3649	-0.111039
8.72933	103.012	11.4926	-1.41081	90.3586	-0.110922
8.73767	103.097	11.4919	-1.40932	90.3524	-0.110805
8.746	103.177	11.491	-1.40783	90.346	-0.110688
8.75433	103.265	11.4902	-1.40634	90.3396	-0.110571
8.76267	103.348	11.4894	-1.40484	90.3331	-0.110453
8.771	103.433	11.4886	-1.40335	90.3265	-0.110335
8.77933	103.517	11.4878	-1.40184	90.3203	-0.110217
8.78767	103.603	11.487	-1.40029	90.314	-0.110095
8.796	103.685	11.4862	-1.39881	90.3078	-0.109979
8.80433	103.774	11.4854	-1.39733	90.3015	-0.109862
8.81267	103.862	11.4846	-1.39584	90.2951	-0.109745
8.821	103.948	11.4838	-1.39434	90.2886	-0.109627
8.82933	104.031	11.4829	-1.39283	90.282	-0.109509
8.83767	104.117	11.4821	-1.39135	90.2758	-0.109392
8.846	104.198	11.4813	-1.38991	90.2695	-0.109279
8.85433	104.284	11.4805	-1.38845	90.2632	-0.109164
8.86267	104.367	11.4797	-1.387	90.2568	-0.10905
8.871	104.451	11.4789	-1.38556	90.2507	-0.108937
8.87933	104.536	11.4781	-1.3841	90.2444	-0.108822
8.88767	104.615	11.4773	-1.38267	90.2383	-0.10871
8.896	104.701	11.4765	-1.38125	90.232	-0.108598
8.90433	104.788	11.4757	-1.37984	90.2258	-0.108487
8.91267	104.877	11.475	-1.37842	90.2198	-0.108376
8.921	104.963	11.4742	-1.37699	90.2133	-0.108263
8.92933	105.044	11.4734	-1.37556	90.2072	-0.10815
8.93767	105.132	11.4726	-1.37416	90.2012	-0.10804
8.946	105.214	11.4719	-1.37275	90.1952	-0.107929
8.95433	105.299	11.4711	-1.37135	90.1893	-0.10782
8.96267	105.382	11.4703	-1.36997	90.1832	-0.107711
8.971	105.468	11.4696	-1.36858	90.1772	-0.107601
8.97933	105.554	11.4688	-1.36718	90.1712	-0.107492
8.98767	105.638	11.468	-1.36577	90.1652	-0.107381
8.996	105.722	11.4673	-1.36437	90.1592	-0.107271
9.00433	105.807	11.4665	-1.363	90.1533	-0.107163
9.01267	105.891	11.4658	-1.36161	90.1472	-0.107054
9.021	105.978	11.465	-1.36021	90.141	-0.106943
9.02933	106.063	11.4642	-1.35881	90.1349	-0.106834
9.03767	106.148	11.4634	-1.35743	90.1286	-0.106725
9.046	106.233	11.4626	-1.35602	90.1224	-0.106614
9.05433	106.315	11.4618	-1.35464	90.1163	-0.106505
9.06267	106.394	11.4611	-1.35328	90.1103	-0.106399
9.071	106.483	11.4603	-1.35192	90.1043	-0.106292
9.07933	106.57	11.4595	-1.35059	90.0983	-0.106187
9.08767	106.656	11.4587	-1.34925	90.092	-0.106082
9.096	106.736	11.458	-1.34791	90.0858	-0.105977
9.10433	106.821	11.4572	-1.34661	90.0797	-0.105874
9.11267	106.906	11.4564	-1.34527	90.0739	-0.105769
9.121	106.989	11.4557	-1.34395	90.068	-0.105665
9.12933	107.075	11.455	-1.34266	90.0622	-0.105564
9.13767	107.159	11.4542	-1.34136	90.0561	-0.105462
9.146	107.241	11.4534	-1.34002	90.0499	-0.105357
9.15433	107.323	11.4526	-1.33871	90.0439	-0.105253
9.16267	107.407	11.4519	-1.33736	90.0378	-0.105147
9.171	107.49	11.4511	-1.33605	90.0322	-0.105044
9.17933	107.578	11.4504	-1.33472	90.0264	-0.10494
9.18767	107.666	11.4496	-1.33337	90.0203	-0.104833
9.196	107.752	11.4488	-1.33206	90.0141	-0.10473
9.20433	107.835	11.4481	-1.33076	90.0081	-0.104628
9.21267	107.914	11.4473	-1.32947	90.0021	-0.104527
9.221	108.002	11.4465	-1.32817	89.9961	-0.104425
9.22933	108.079	11.4458	-1.32686	89.9902	-0.104321
9.23767	108.169	11.4451	-1.32561	89.9844	-0.104223
9.246	108.252	11.4443	-1.32436	89.9784	-0.104125
9.25433	108.335	11.4435	-1.32309	89.9724	-0.104025
9.26267	108.424	11.4428	-1.32179	89.9665	-0.103923
9.271	108.512	11.4421	-1.32052	89.9609	-0.103823
9.27933	108.591	11.4413	-1.31925	89.9551	-0.103723
9.28767	108.674	11.4406	-1.31798	89.9491	-0.103623
9.296	108.765	11.4398	-1.31669	89.9433	-0.103522
9.30433	108.848	11.4391	-1.31544	89.9376	-0.103424
9.31267	108.932	11.4384	-1.31421	89.9319	-0.103327
9.321	109.014	11.4377	-1.31291	89.9263	-0.103225
9.32933	109.097	11.4369	-1.31163	89.9207	-0.103124
9.33767	109.182	11.4362	-1.31038	89.9149	-0.103026
9.346	109.263	11.4355	-1.30918	89.909	-0.102932
9.35433	109.351	11.4347	-1.30794	89.9032	-0.102835
9.36267	109.432	11.434	-1.3067	89.8976	-0.102737
9.371	109.515	11.4333	-1.30546	89.892	-0.102639
9.37933	109.602	11.4326	-1.30424	89.8863	-0.102543
9.38767	109.687	11.4318	-1.30301	89.8804	-0.102446
9.396	109.768	11.4311	-1.30176	89.8744	-0.102348
9.40433	109.856	11.4303	-1.30056	89.8685	-0.102254
9.41267	109.942	11.4296	-1.29937	89.8627	-0.10216
9.421	110.027	11.4288	-1.29818	89.8569	-0.102067
9.42933	110.106	11.4281	-1.29695	89.8513	-0.10197
9.43767	110.191	11.4274	-1.29575	89.8458	-0.101876
9.446	110.278	11.4267	-1.29456	89.8399	-0.101782
9.45433	110.364	11.4259	-1.29337	89.8341	-0.101689
9.46267	110.45	11.4252	-1.29216	89.8284	-0.101594
9.471	110.534	11.4245	-1.29096	89.8229	-0.101499
9.47933	110.618	11.4238	-1.28978	89.8173	-0.101406
9.48767	110.707	11.4231	-1.28857	89.8115	-0.101311
9.496	110.785	11.4223	-1.28742	89.8057	-0.101221
9.50433	110.872	11.4216	-1.28623	89.8001	-0.101127
9.51267	110.951	11.4209	-1.28508	89.7943	-0.101036
9.521	111.044	11.4201	-1.28391	89.7885	-0.100945
9.52933	111.126	11.4194	-1.28273	89.7831	-0.100852
9.53767	111.214	11.4188	-1.28158	89.7777	-0.100762
9.546	111.297	11.418	-1.28042	89.772	-0.100671
9.55433	111.381	11.4173	-1.27927	89.7663	-0.10058
9.56267	111.464	11.4166	-1.27812	89.7605	-0.10049
9.571	111.55	11.4159	-1.27697	89.755	-0.100399
9.57933	111.63	11.4152	-1.27579	89.7495	-0.100306
9.58767	111.723	11.4145	-1.27462	89.744	-0.100214
9.596	111.802	11.4138	-1.27345	89.7385	-0.100123
9.60433	111.885	11.4131	-1.27231	89.7329	-0.100033
9.61267	111.969	11.4123	-1.27118	89.7271	-0.0999439
9.621	112.054	11.4116	-1.27004	89.7215	-0.0998545
9.62933	112.136	11.4109	-1.26891	89.7159	-0.0997655
9.63767	112.223	11.4102	-1.26776	89.7104	-0.0996752
9.646	112.305	11.4095	-1.26664	89.7052	-0.0995868
9.65433	112.392	11.4089	-1.26555	89.6998	-0.0995017
9.66267	112.477	11.4082	-1.26445	89.6943	-0.099415
9.671	112.562	11.4074	-1.26337	89.6887	-0.0993301
9.67933	112.645	11.4067	-1.26226	89.6831	-0.0992425
9.68767	112.729	11.4061	-1.26115	89.6777	-0.0991553
9.696	112.814	11.4054	-1.26007	89.6723	-0.0990702
9.70433	112.898	11.4047	-1.25897	89.6671	-0.0989841
9.71267	112.979	11.404	-1.25789	89.6616	-0.0988994
9.721	113.066	11.4033	-1.25684	89.6562	-0.0988167
9.72933	113.155	11.4026	-1.25579	89.6505	-0.0987341
9.73767	113.241	11.4019	-1.25473	89.6451	-0.0986504
9.746	113.316	11.4012	-1.25367	89.6397	-0.098567
9.75433	113.406	11.4005	-1.2526	89.6344	-0.0984831
9.76267	113.491	11.3998	-1.25155	89.6288	-0.0984003
9.771	113.575	11.3991	-1.2505	89.6234	-0.0983177
9.77933	113.659	11.3985	-1.24942	89.6181	-0.0982329
9.78767	113.746	11.3978	-1.24836	89.6126	-0.0981501
9.796	113.829	11.397	-1.24732	89.6069	-0.0980681
9.80433	113.913	11.3963	-1.24628	89.6015	-0.0979863
9.81267	113.995	11.3957	-1.24522	89.5961	-0.0979029
9.821	114.081	11.395	-1.24413	89.5906	-0.0978171
9.82933	114.164	11.3943	-1.24306	89.5852	-0.0977329
9.83767	114.248	11.3936	-1.24199	89.5797	-0.097649
9.846	114.329	11.3929	-1.24097	89.5745	-0.0975683
9.85433	114.42	11.3922	-1.23993	89.569	-0.0974872
9.86267	114.501	11.3915	-1.23891	89.5634	-0.0974069
9.871	114.587	11.3908	-1.23788	89.5578	-0.0973256
9.87933	114.671	11.3901	-1.23683	89.5526	-0.0972432
9.88767	114.755	11.3894	-1.2358	89.5472	-0.0971621
9.896	114.84	11.3887	-1.23477	89.5417	-0.0970817
9.90433	114.926	11.388	-1.23377	89.5361	-0.0970029
9.91267	115.007	11.3874	-1.23277	89.5309	-0.0969242
9.921	115.094	11.3867	-1.23181	89.5258	-0.0968482
9.92933	115.178	11.3861	-1.23081	89.5206	-0.0967697
9.93767	115.264	11.3854	-1.22981	89.5152	-0.0966912
9.946	115.347	11.3847	-1.2288	89.51	-0.0966121
9.95433	115.432	11.384	-1.22783	89.5046	-0.0965355
9.96267	115.516	11.3834	-1.22684	89.4994	-0.0964576
9.971	115.6	11.3827	-1.22585	89.494	-0.0963798
9.97933	115.686	11.382	-1.22487	89.4888	-0.096303
9.98767	115.769	11.3814	-1.22389	89.4839	-0.0962261
9.996	115.855	11.3807	-1.22293	89.4787	-0.0961502
10.0043	115.931	11.3801	-1.22194	89.4733	-0.0960725
10.0127	116.02	11.3794	-1.22097	89.4679	-0.0959966
10.021	116.101	11.3787	-1.22003	89.4627	-0.0959222
10.0293	116.184	11.378	-1.21909	89.4574	-0.0958485
10.0377	116.274	11.3774	-1.21812	89.4522	-0.0957719
10.046	116.353	11.3767	-1.2172	89.4468	-0.0956999
10.0543	116.437	11.376	-1.21625	89.4416	-0.0956248
10.0627	116.523	11.3754	-1.21531	89.4365	-0.0955514
10.071	116.611	11.3747	-1.21441	89.4311	-0.0954804
10.0793	116.689	11.374	-1.21351	89.4257	-0.0954101
10.0877	116.776	11.3733	-1.21257	89.4203	-0.095336
10.096	116.863	11.3727	-1.21165	89.4153	-0.0952634
10.1043	116.946	11.372	-1.21073	89.4098	-0.0951909
10.1127	117.03	11.3713	-1.20978	89.4046	-0.0951167
10.121	117.116	11.3706	-1.20886	89.3994	-0.0950442
10.1293	117.202	11.37	-1.20792	89.3942	-0.0949701
10.1377	117.289	11.3693	-1.207	89.3889	-0.0948978
10.146	117.37	11.3686	-1.20609	89.3836	-0.0948262
10.1543	117.453	11.368	-1.20518	89.3783	-0.0947544
10.1627	117.538	11.3673	-1.2042	89.3729	-0.0946779
10.171	117.623	11.3666	-1.20332	89.3677	-0.0946083
10.1793	117.704	11.3659	-1.20245	89.3624	-0.0945401
10.1877	117.79	11.3653	-1.20155	89.3573	-0.0944694
10.196	117.874	11.3646	-1.20067	89.3521	-0.0944006
10.2043	117.96	11.364	-1.19979	89.3471	-0.094331
10.2127	118.043	11.3633	-1.19894	89.3417	-0.0942643
10.221	118.128	11.3627	-1.19811	89.3368	-0.0941989
10.2293	118.209	11.362	-1.19724	89.3316	-0.094131
10.2377	118.295	11.3614	-1.19636	89.3265	-0.0940615
10.246	118.376	11.3607	-1.19555	89.3215	-0.0939975
10.2543	118.464	11.3601	-1.19467	89.3164	-0.0939283
10.2627	118.547	11.3595	-1.1938	89.3114	-0.0938599
10.271	118.626	11.3588	-1.19293	89.3062	-0.093792
10.2793	118.713	11.3581	-1.1921	89.301	-0.0937268
10.2877	118.8	11.3575	-1.19129	89.2957	-0.0936631
10.296	118.886	11.3568	-1.19045	89.2906	-0.0935969
10.3043	118.966	11.3561	-1.18958	89.2853	-0.0935286
10.3127	119.05	11.3555	-1.18876	89.2801	-0.0934638
10.321	119.132	11.3548	-1.18797	89.275	-0.0934016
10.3293	119.22	11.3541	-1.18715	89.2696	-0.0933369
10.3377	119.306	11.3535	-1.18636	89.2643	-0.0932752
10.346	119.39	11.3528	-1.18553	89.2592	-0.0932101
10.3543	119.473	11.3522	-1.18473	89.2543	-0.0931471
10.3627	119.557	11.3515	-1.18391	89.2493	-0.0930828
10.371	119.637	11.3509	-1.18313	89.2443	-0.0930213
10.3793	119.728	11.3503	-1.18236	89.2393	-0.092961
10.3877	119.815	11.3496	-1.18164	89.2342	-0.0929038
10.396	119.897	11.349	-1.18084	89.2291	-0.0928412
10.4043	119.984	11.3483	-1.18002	89.2239	-0.0927768
10.4127	120.068	11.3477	-1.17925	89.2191	-0.0927159
10.421	120.148	11.3471	-1.17847	89.214	-0.0926552
10.4293	120.236	11.3464	-1.17774	89.2088	-0.0925976
10.4377	120.323	11.3457	-1.177	89.2036	-0.0925391
10.446	120.401	11.3451	-1.17626	89.1987	-0.0924809
10.4543	120.487	11.3445	-1.17549	89.1935	-0.0924205
10.4627	120.574	11.3438	-1.17473	89.1884	-0.0923609
10.471	120.657	11.3432	-1.17396	89.1836	-0.0922999
10.4793	120.743	11.3426	-1.17321	89.1786	-0.0922409
10.4877	120.824	11.342	-1.17249	89.1739	-0.0921846
10.496	120.909	11.3413	-1.17176	89.1687	-0.0921269
10.5043	120.991	11.3407	-1.17104	89.1638	-0.0920706
10.5127	121.076	11.34	-1.17029	89.1588	-0.0920114
10.521	121.16	11.3394	-1.16955	89.1539	-0.0919538
10.5293	121.243	11.3388	-1.16883	89.1489	-0.0918966
10.5377	121.333	11.3382	-1.16813	89.144	-0.0918417
10.546	121.413	11.3375	-1.16744	89.1389	-0.0917878
10.5543	121.5	11.3369	-1.16674	89.134	-0.0917326
10.5627	121.585	11.3362	-1.16608	89.129	-0.0916807
10.571	121.666	11.3356	-1.16541	89.1239	-0.091628
10.5793	121.751	11.335	-1.16473	89.1188	-0.0915748
10.5877	121.831	11.3343	-1.16402	89.1136	-0.0915188
10.596	121.917	11.3337	-1.16336	89.1086	-0.0914668
10.6043	122.003	11.333	-1.1627	89.1035	-0.0914147
10.6127	122.086	11.3324	-1.16204	89.0985	-0.0913628
10.621	122.168	11.3317	-1.16136	89.0933	-0.0913096
10.6293	122.255	11.3311	-1.16068	89.0883	-0.0912559
10.6377	122.336	11.3304	-1.16004	89.083	-0.0912061
10.646	122.421	11.3298	-1.1594	89.0779	-0.0911552
10.6543	122.507	11.3291	-1.15872	89.0726	-0.0911022
10.6627	122.594	11.3284	-1.15805	89.0676	-0.091049
10.671	122.675	11.3278	-1.15743	89.0626	-0.0910007
10.6793	122.756	11.3272	-1.1568	89.0575	-0.0909509
10.6877	122.843	11.3265	-1.15617	89.0524	-0.0909017
10.696	122.924	11.3259	-1.15553	89.0472	-0.0908516
10.7043	123.011	11.3252	-1.15489	89.0422	-0.0908006
10.7127	123.093	11.3246	-1.15426	89.0373	-0.0907513
10.721	123.177	11.324	-1.15361	89.0323	-0.0907002
10.7293	123.258	11.3233	-1.15299	89.0274	-0.0906513
10.7377	123.346	11.3227	-1.1524	89.0225	-0.0906047
10.746	123.432	11.3221	-1.15181	89.0177	-0.0905584
10.7543	123.514	11.3215	-1.15115	89.0126	-0.0905068
10.7627	123.596	11.3208	-1.15055	89.0075	-0.0904597
10.771	123.678	11.3202	-1.14994	89.0025	-0.0904114
10.7793	123.762	11.3195	-1.14932	88.9975	-0.0903626
10.7877	123.851	11.3189	-1.14875	88.9924	-0.0903185
10.796	123.93	11.3182	-1.14817	88.9871	-0.0902725
10.8043	124.016	11.3176	-1.14759	88.9821	-0.0902266
10.8127	124.101	11.3169	-1.14701	88.9771	-0.0901815
10.821	124.187	11.3163	-1.14642	88.9722	-0.0901353
10.8293	124.269	11.3157	-1.14585	88.9671	-0.0900903
10.8377	124.352	11.3151	-1.14534	88.9624	-0.09005
10.846	124.435	11.3145	-1.14479	88.9576	-0.0900069
10.8543	124.523	11.3138	-1.14422	88.9525	-0.089962
10.8627	124.606	11.3132	-1.14368	88.9474	-0.0899196
10.871	124.693	11.3125	-1.14312	88.9425	-0.0898753
10.8793	124.775	11.3119	-1.14254	88.9374	-0.0898298
10.8877	124.856	11.3112	-1.14197	88.9323	-0.0897851
10.896	124.943	11.3106	-1.14138	88.9272	-0.0897388
10.9043	125.023	11.3099	-1.1408	88.9221	-0.0896928
10.9127	125.107	11.3093	-1.14024	88.9171	-0.0896487
10.921	125.193	11.3087	-1.13965	88.9122	-0.0896028
10.9293	125.275	11.3081	-1.13906	88.9076	-0.089556
10.9377	125.363	11.3075	-1.13853	88.9028	-0.0895142
10.946	125.444	11.3068	-1.13799	88.8977	-0.0894723
10.9543	125.528	11.3062	-1.13745	88.8929	-0.08943
10.9627	125.611	11.3056	-1.13692	88.8881	-0.0893883
10.971	125.697	11.305	-1.13641	88.8833	-0.089348
10.9793	125.779	11.3044	-1.1359	88.8783	-0.0893077
10.9877	125.867	11.3038	-1.13543	88.8735	-0.0892706
10.996	125.951	11.3031	-1.13489	88.8685	-0.0892285
11.0043	126.034	11.3025	-1.13437	88.8634	-0.0891878
11.0127	126.114	11.3018	-1.13386	88.8583	-0.0891478
11.021	126.199	11.3012	-1.13334	88.8533	-0.0891066
11.0293	126.284	11.3005	-1.1328	88.8483	-0.0890639
11.0377	126.369	11.2999	-1.13225	88.8432	-0.0890209
11.046	126.451	11.2993	-1.13174	88.8383	-0.0889811
11.0543	126.534	11.2987	-1.13122	88.8333	-0.0889403
11.0627	126.616	11.298	-1.13071	88.8285	-0.0888999
11.071	126.705	11.2974	-1.13019	88.8236	-0.0888587
11.0793	126.785	11.2968	-1.12972	88.8188	-0.088822
11.0877	126.866	11.2962	-1.12926	88.8139	-0.0887861
11.096	126.949	11.2955	-1.1288	88.8086	-0.0887496
11.1043	127.037	11.2949	-1.12833	88.8035	-0.0887129
11.1127	127.119	11.2942	-1.12787	88.7987	-0.0886763
11.121	127.204	11.2936	-1.12739	88.7937	-0.0886389
11.1293	127.29	11.293	-1.12692	88.7887	-0.0886016
11.1377	127.374	11.2923	-1.12643	88.7837	-0.0885634
11.146	127.459	11.2917	-1.12597	88.7789	-0.0885268
11.1543	127.538	11.2911	-1.1255	88.7738	-0.0884901
11.1627	127.627	11.2904	-1.12502	88.7687	-0.0884521
11.171	127.709	11.2898	-1.12453	88.7638	-0.0884137
11.1793	127.792	11.2892	-1.12404	88.7589	-0.0883755
11.1877	127.879	11.2885	-1.12355	88.7538	-0.0883368
11.196	127.959	11.2879	-1.12306	88.7489	-0.0882985
11.2043	128.047	11.2873	-1.12259	88.7439	-0.0882617
11.2127	128.132	11.2867	-1.12213	88.7391	-0.0882253
11.221	128.217	11.286	-1.12166	88.7342	-0.0881884
11.2293	128.3	11.2854	-1.12117	88.7292	-0.0881496
11.2377	128.385	11.2848	-1.12065	88.7241	-0.0881087
11.246	128.467	11.2841	-1.12015	88.7193	-0.0880695
11.2543	128.55	11.2835	-1.11967	88.7142	-0.0880319
11.2627	128.632	11.2829	-1.11921	88.7095	-0.0879959
11.271	128.717	11.2823	-1.11877	88.7047	-0.0879613
11.2793	128.796	11.2817	-1.11831	88.6998	-0.0879252
11.2877	128.883	11.2811	-1.11787	88.6952	-0.08789
11.296	128.968	11.2805	-1.1174	88.6906	-0.0878533
11.3043	129.049	11.2799	-1.11694	88.6858	-0.0878172
11.3127	129.132	11.2792	-1.11649	88.6808	-0.0877814
11.321	129.215	11.2786	-1.11607	88.6759	-0.0877489
11.3293	129.305	11.278	-1.11565	88.671	-0.087716
11.3377	129.388	11.2774	-1.11522	88.6661	-0.0876815
11.346	129.469	11.2768	-1.11477	88.6614	-0.0876468
11.3543	129.553	11.2762	-1.11432	88.6566	-0.0876111
11.3627	129.638	11.2755	-1.11387	88.6516	-0.0875758
11.371	129.722	11.2749	-1.11343	88.6466	-0.0875409
11.3793	129.804	11.2743	-1.11299	88.6415	-0.0875069
11.3877	129.886	11.2736	-1.1126	88.6365	-0.0874755
11.396	129.974	11.273	-1.1122	88.6317	-0.0874447
11.4043	130.056	11.2724	-1.11178	88.627	-0.0874111
11.4127	130.14	11.2718	-1.11134	88.622	-0.087377
11.421	130.217	11.2711	-1.11089	88.617	-0.0873413
11.4293	130.303	11.2705	-1.11043	88.6119	-0.0873054
11.4377	130.391	11.2698	-1.11002	88.6067	-0.087273
11.446	130.476	11.2692	-1.10962	88.6017	-0.0872418
11.4543	130.562	11.2685	-1.10918	88.5966	-0.0872069
11.4627	130.646	11.2679	-1.10874	88.5915	-0.0871726
11.471	130.726	11.2673	-1.10832	88.5865	-0.0871394
11.4793	130.811	11.2666	-1.10789	88.5817	-0.0871054
11.4877	130.898	11.266	-1.10749	88.5767	-0.0870743
11.496	130.976	11.2654	-1.10711	88.5718	-0.0870444
11.5043	131.066	11.2648	-1.10673	88.567	-0.0870144
11.5127	131.146	11.2642	-1.10635	88.5623	-0.0869846
11.521	131.23	11.2636	-1.10593	88.5574	-0.0869512
11.5293	131.312	11.2629	-1.10554	88.5525	-0.086921
11.5377	131.4	11.2623	-1.10515	88.5476	-0.0868905
11.546	131.484	11.2617	-1.10475	88.5427	-0.0868585
11.5543	131.569	11.261	-1.10432	88.5376	-0.0868252
11.5627	131.652	11.2604	-1.10393	88.5327	-0.0867946
11.571	131.735	11.2598	-1.10353	88.5277	-0.0867631
11.5793	131.817	11.2592	-1.1031	88.523	-0.0867293
11.5877	131.901	11.2586	-1.10269	88.5181	-0.0866969
11.596	131.984	11.2579	-1.1023	88.5132	-0.0866662
11.6043	132.069	11.2573	-1.1019	88.5082	-0.0866347
11.6127	132.153	11.2567	-1.10149	88.5037	-0.0866022
11.621	132.239	11.2561	-1.10109	88.4991	-0.0865709
11.6293	132.32	11.2555	-1.10072	88.4945	-0.0865422
11.6377	132.407	11.2549	-1.10034	88.4898	-0.0865123
11.646	132.493	11.2543	-1.09992	88.485	-0.0864791
11.6543	132.573	11.2537	-1.09949	88.4799	-0.0864452
11.6627	132.655	11.2531	-1.0991	88.475	-0.0864143
11.671	132.741	11.2525	-1.09869	88.4702	-0.0863826
11.6793	132.824	11.2518	-1.09828	88.4654	-0.0863503
11.6877	132.91	11.2513	-1.09792	88.4607	-0.086322
11.696	132.994	11.2506	-1.09752	88.4557	-0.0862906
11.7043	133.075	11.25	-1.09713	88.4505	-0.0862596
11.7127	133.156	11.2493	-1.09671	88.4454	-0.0862264
11.721	133.242	11.2487	-1.09628	88.4405	-0.0861926
11.7293	133.33	11.2481	-1.09587	88.4356	-0.0861606
11.7377	133.412	11.2474	-1.09549	88.4306	-0.0861309
11.746	133.496	11.2468	-1.09509	88.4257	-0.0860994
11.7543	133.571	11.2462	-1.0947	88.4206	-0.0860687
11.7627	133.66	11.2455	-1.09429	88.4156	-0.0860363
11.771	133.741	11.2448	-1.09385	88.4103	-0.0860017
11.7793	133.825	11.2442	-1.09341	88.4055	-0.0859674
11.7877	133.911	11.2436	-1.09299	88.4006	-0.0859344
11.796	133.996	11.243	-1.09259	88.3957	-0.0859026
11.8043	134.076	11.2424	-1.09218	88.3908	-0.0858706
11.8127	134.166	11.2417	-1.09178	88.386	-0.0858391
11.821	134.253	11.2411	-1.09132	88.3811	-0.0858028
11.8293	134.332	11.2405	-1.09088	88.3764	-0.0857681
11.8377	134.414	11.2399	-1.09045	88.3717	-0.0857348
11.846	134.497	11.2394	-1.09004	88.3673	-0.0857019
11.8543	134.582	11.2388	-1.08962	88.3628	-0.0856691
11.8627	134.662	11.2382	-1.08923	88.3581	-0.0856383
11.871	134.743	11.2376	-1.08882	88.3535	-0.0856063
11.8793	134.834	11.237	-1.08838	88.3489	-0.0855717
11.8877	134.921	11.2364	-1.08792	88.3441	-0.0855357
11.896	135.002	11.2358	-1.08747	88.3394	-0.0855
11.9043	135.083	11.2353	-1.08705	88.3349	-0.0854669
11.9127	135.175	11.2346	-1.08658	88.3301	-0.0854305
11.921	135.253	11.234	-1.08611	88.3251	-0.0853932
11.9293	135.335	11.2334	-1.08564	88.3203	-0.0853566
11.9377	135.42	11.2328	-1.08518	88.3156	-0.08532
11.946	135.506	11.2322	-1.08469	88.3109	-0.0852817
11.9543	135.585	11.2316	-1.0842	88.3062	-0.0852433
11.9627	135.671	11.231	-1.08372	88.3015	-0.085205
11.971	135.755	11.2304	-1.08324	88.2971	-0.0851675
11.9793	135.836	11.2299	-1.08277	88.2924	-0.0851308
11.9877	135.922	11.2293	-1.08226	88.2877	-0.0850904
11.996	136.007	11.2287	-1.08179	88.2833	-0.0850534
12.0043	136.089	11.2281	-1.08129	88.279	-0.0850144
12.0127	136.172	11.2276	-1.08078	88.2744	-0.0849744
12.021	136.254	11.2269	-1.08028	88.2695	-0.0849347
12.0293	136.338	11.2263	-1.07979	88.2647	-0.0848962
12.0377	136.425	11.2257	-1.07927	88.26	-0.0848556
12.046	136.507	11.2251	-1.07878	88.2551	-0.0848169
12.0543	136.592	11.2245	-1.0783	88.2504	-0.0847789
12.0627	136.681	11.2239	-1.07777	88.2459	-0.0847373
12.071	136.763	11.2234	-1.07726	88.2415	-0.0846971
12.0793	136.851	11.2228	-1.0767	88.2367	-0.0846532
12.0877	136.931	11.2222	-1.07615	88.232	-0.0846104
12.096	137.014	11.2216	-1.0756	88.2272	-0.084567
12.1043	137.1	11.221	-1.07508	88.2228	-0.0845263
12.1127	137.18	11.2204	-1.07451	88.2184	-0.0844812
12.121	137.264	11.2199	-1.07399	88.2141	-0.08444
12.1293	137.351	11.2194	-1.0734	88.2099	-0.084394
12.1377	137.435	11.2188	-1.07281	88.2055	-0.0843471
12.146	137.516	11.2182	-1.07227	88.2009	-0.0843053
12.1543	137.601	11.2176	-1.07173	88.1961	-0.0842629
12.1627	137.688	11.217	-1.0712	88.1915	-0.0842206
12.171	137.773	11.2164	-1.07066	88.187	-0.0841782
12.1793	137.854	11.2159	-1.0701	88.1824	-0.0841345
12.1877	137.942	11.2153	-1.0695	88.178	-0.0840875
12.196	138.023	11.2147	-1.06892	88.1736	-0.0840413
12.2043	138.104	11.2142	-1.06831	88.169	-0.0839934
12.2127	138.191	11.2136	-1.06774	88.1644	-0.0839486
12.221	138.271	11.213	-1.06716	88.1599	-0.0839036
12.2293	138.355	11.2124	-1.06655	88.1555	-0.0838551
12.2377	138.443	11.2119	-1.06596	88.1514	-0.0838089
12.246	138.526	11.2114	-1.06539	88.1473	-0.0837637
12.2543	138.609	11.2108	-1.06478	88.1429	-0.0837159
12.2627	138.695	11.2103	-1.06417	88.1384	-0.0836684
12.271	138.779	11.2097	-1.06356	88.1341	-0.0836202
12.2793	138.864	11.2091	-1.06298	88.1296	-0.0835748
12.2877	138.944	11.2086	-1.06239	88.1252	-0.0835285
12.296	139.028	11.208	-1.06178	88.1209	-0.0834804
12.3043	139.112	11.2075	-1.06117	88.1165	-0.0834323
12.3127	139.201	11.207	-1.06058	88.1124	-0.0833858
12.321	139.283	11.2064	-1.05996	88.108	-0.083337
12.3293	139.365	11.2058	-1.05934	88.1036	-0.0832885
12.3377	139.453	11.2053	-1.05871	88.0992	-0.0832388
12.346	139.539	11.2048	-1.05812	88.0951	-0.0831927
12.3543	139.619	11.2042	-1.05749	88.0907	-0.0831432
12.3627	139.704	11.2036	-1.05685	88.0864	-0.0830925
12.371	139.789	11.2031	-1.05621	88.0822	-0.0830421
12.3793	139.872	11.2026	-1.05559	88.0778	-0.0829934
12.3877	139.96	11.202	-1.05494	88.0736	-0.0829426
12.396	140.04	11.2015	-1.05428	88.0692	-0.0828904
12.4043	140.12	11.2009	-1.05363	88.0647	-0.0828392
12.4127	140.209	11.2003	-1.05298	88.0602	-0.0827883
12.421	140.291	11.1998	-1.05234	88.0558	-0.0827378
12.4293	140.375	11.1992	-1.05166	88.0514	-0.0826843
12.4377	140.458	11.1986	-1.05102	88.047	-0.0826345
12.446	140.542	11.1981	-1.05036	88.0428	-0.0825824
12.4543	140.625	11.1976	-1.0497	88.0385	-0.0825305
12.4627	140.707	11.197	-1.04902	88.0343	-0.0824771
12.471	140.791	11.1965	-1.04837	88.0299	-0.0824263
12.4793	140.879	11.1959	-1.04774	88.0257	-0.0823763
12.4877	140.96	11.1954	-1.04709	88.0216	-0.0823249
12.496	141.043	11.1949	-1.04641	88.0175	-0.0822717
12.5043	141.134	11.1944	-1.04574	88.0136	-0.0822196
12.5127	141.216	11.1939	-1.04509	88.0098	-0.0821682
12.521	141.302	11.1934	-1.04445	88.0058	-0.0821178
12.5293	141.383	11.1928	-1.0438	88.0015	-0.0820668
12.5377	141.469	11.1923	-1.04313	87.9973	-0.0820138
12.546	141.551	11.1918	-1.04245	87.9932	-0.0819608
12.5543	141.639	11.1913	-1.04181	87.989	-0.0819099
12.5627	141.717	11.1907	-1.0411	87.9848	-0.0818545
12.571	141.806	11.1902	-1.0404	87.9807	-0.0817995
12.5793	141.886	11.1897	-1.03972	87.9766	-0.081746
12.5877	141.972	11.1891	-1.03908	87.9723	-0.0816953
12.596	142.059	11.1886	-1.03839	87.9681	-0.081641
12.6043	142.143	11.1881	-1.03764	87.9642	-0.0815823
12.6127	142.225	11.1876	-1.03694	87.9605	-0.0815273
12.621	142.311	11.1872	-1.03628	87.9568	-0.081475
12.6293	142.39	11.1867	-1.03563	87.9528	-0.0814243
12.6377	142.472	11.1862	-1.03492	87.9489	-0.0813682
12.646	142.556	11.1857	-1.03424	87.945	-0.081315
12.6543	142.646	11.1852	-1.03357	87.941	-0.0812619
12.6627	142.726	11.1846	-1.03288	87.937	-0.0812082
12.671	142.81	11.1841	-1.03217	87.9328	-0.0811525
12.6793	142.897	11.1836	-1.0315	87.9286	-0.0810993
12.6877	142.979	11.183	-1.03085	87.9242	-0.0810488
12.696	143.061	11.1825	-1.03017	87.92	-0.0809951
12.7043	143.145	11.182	-1.02947	87.9158	-0.0809404
12.7127	143.235	11.1814	-1.02877	87.9118	-0.0808848
12.721	143.315	11.1809	-1.02811	87.9079	-0.0808333
12.7293	143.401	11.1804	-1.02743	87.9037	-0.0807796
12.7377	143.487	11.1799	-1.02675	87.8998	-0.0807258
12.746	143.567	11.1794	-1.02606	87.8958	-0.0806719
12.7543	143.653	11.1789	-1.02538	87.892	-0.0806187
12.7627	143.74	11.1784	-1.02469	87.8883	-0.0805641
12.771	143.822	11.1779	-1.02398	87.8844	-0.0805087
12.7793	143.91	11.1775	-1.0233	87.8805	-0.0804548
12.7877	143.993	11.177	-1.0226	87.8767	-0.0804002
12.796	144.075	11.1765	-1.02191	87.8726	-0.0803458
12.8043	144.158	11.176	-1.02119	87.8686	-0.0802887
12.8127	144.24	11.1754	-1.02047	87.8645	-0.0802325
12.821	144.326	11.1749	-1.01977	87.8606	-0.0801776
12.8293	144.409	11.1744	-1.01908	87.8566	-0.0801228
12.8377	144.491	11.1739	-1.01836	87.8528	-0.0800665
12.846	144.582	11.1735	-1.01769	87.849	-0.0800136
12.8543	144.668	11.173	-1.01702	87.8453	-0.0799611
12.8627	144.748	11.1725	-1.01632	87.8413	-0.0799058
12.871	144.83	11.172	-1.01562	87.8373	-0.0798513
12.8793	144.914	11.1715	-1.01491	87.8336	-0.0797955
12.8877	144.999	11.171	-1.01423	87.8296	-0.0797415
12.896	145.082	11.1705	-1.01355	87.8257	-0.0796885
12.9043	145.167	11.17	-1.01284	87.8217	-0.0796323
12.9127	145.252	11.1695	-1.01213	87.8177	-0.0795765
12.921	145.334	11.169	-1.01143	87.8139	-0.0795216
12.9293	145.42	11.1685	-1.0107	87.8099	-0.079464
12.9377	145.504	11.168	-1.00996	87.8058	-0.0794063
12.946	145.592	11.1675	-1.0093	87.8019	-0.0793538
12.9543	145.673	11.167	-1.00862	87.798	-0.0793007
12.9627	145.76	11.1665	-1.00796	87.7941	-0.079249
12.971	145.84	11.166	-1.00727	87.7903	-0.0791946
12.9793	145.927	11.1655	-1.00656	87.7866	-0.0791388
12.9877	146.011	11.165	-1.00589	87.7828	-0.0790858
12.996	146.093	11.1646	-1.00521	87.7792	-0.0790328
13.0043	146.172	11.164	-1.00451	87.775	-0.0789776
13.0127	146.262	11.1636	-1.0038	87.7711	-0.0789218
13.021	146.344	11.1631	-1.00313	87.7674	-0.0788693
13.0293	146.429	11.1626	-1.00243	87.7636	-0.0788139
13.0377	146.512	11.1621	-1.00171	87.7597	-0.0787576
13.046	146.595	11.1616	-1.001	87.7558	-0.0787014
13.0543	146.676	11.1611	-1.00031	87.7522	-0.078647
13.0627	146.765	11.1607	-0.99962	87.7486	-0.0785931
13.071	146.846	11.1602	-0.99894	87.745	-0.0785396
13.0793	146.93	11.1597	-0.99825	87.7412	-0.0784854
13.0877	147.015	11.1593	-0.997602	87.7374	-0.0784344
13.096	147.101	11.1588	-0.996968	87.7338	-0.0783846
13.1043	147.184	11.1583	-0.996311	87.7299	-0.0783329
13.1127	147.265	11.1578	-0.995658	87.7263	-0.0782816
13.121	147.352	11.1574	-0.995011	87.7227	-0.0782307
13.1293	147.434	11.1569	-0.994375	87.7189	-0.0781808
13.1377	147.521	11.1564	-0.993765	87.7151	-0.0781328
13.146	147.604	11.1559	-0.993142	87.7112	-0.0780838
13.1543	147.686	11.1554	-0.992497	87.7074	-0.078033
13.1627	147.774	11.155	-0.99186	87.7037	-0.077983
13.171	147.854	11.1545	-0.991186	87.7	-0.07793
13.1793	147.94	11.154	-0.99051	87.6962	-0.0778769
13.1877	148.027	11.1536	-0.989851	87.6926	-0.0778251
13.196	148.108	11.1531	-0.989187	87.6889	-0.0777728
13.2043	148.188	11.1526	-0.988538	87.685	-0.0777218
13.2127	148.276	11.1521	-0.987868	87.6811	-0.0776691
13.221	148.362	11.1516	-0.987172	87.6773	-0.0776144
13.2293	148.442	11.1511	-0.986508	87.6734	-0.0775622
13.2377	148.528	11.1506	-0.985848	87.6696	-0.0775103
13.246	148.615	11.1502	-0.985201	87.6661	-0.0774594
13.2543	148.701	11.1497	-0.984558	87.6626	-0.0774088
13.2627	148.781	11.1493	-0.983912	87.6589	-0.0773581
13.271	148.867	11.1488	-0.983242	87.6553	-0.0773054
13.2793	148.953	11.1484	-0.982615	87.6517	-0.0772561
13.2877	149.035	11.1479	-0.981992	87.648	-0.0772071
13.296	149.117	11.1474	-0.98134	87.6446	-0.0771559
13.3043	149.201	11.147	-0.980684	87.641	-0.0771043
13.3127	149.288	11.1465	-0.98004	87.6374	-0.0770537
13.321	149.373	11.1461	-0.979405	87.6339	-0.0770037
13.3293	149.456	11.1456	-0.978746	87.6302	-0.0769519
13.3377	149.539	11.1451	-0.978109	87.6263	-0.0769019
13.346	149.623	11.1447	-0.977483	87.6227	-0.0768526
13.3543	149.705	11.1442	-0.976871	87.619	-0.0768045
13.3627	149.791	11.1437	-0.97622	87.6152	-0.0767533
13.371	149.876	11.1433	-0.975573	87.6118	-0.0767025
13.3793	149.958	11.1428	-0.974964	87.6081	-0.0766546
13.3877	150.043	11.1423	-0.974348	87.6044	-0.0766061
13.396	150.125	11.1419	-0.973711	87.6007	-0.076556
13.4043	150.211	11.1414	-0.973087	87.5971	-0.076507
13.4127	150.297	11.141	-0.972464	87.5935	-0.076458
13.421	150.372	11.1405	-0.971816	87.5898	-0.0764071
13.4293	150.464	11.14	-0.971186	87.5861	-0.0763575
13.4377	150.546	11.1395	-0.970542	87.5824	-0.0763069
13.446	150.627	11.1391	-0.969916	87.5789	-0.0762576
13.4543	150.716	11.1386	-0.969276	87.5753	-0.0762074
13.4627	150.799	11.1382	-0.968651	87.5717	-0.0761583
13.471	150.889	11.1377	-0.968039	87.5681	-0.0761101
13.4793	150.966	11.1373	-0.967399	87.5647	-0.0760598
13.4877	151.052	11.1368	-0.966758	87.5611	-0.0760094
13.496	151.134	11.1364	-0.966152	87.5577	-0.0759618
13.5043	151.222	11.136	-0.965557	87.5542	-0.075915
13.5127	151.307	11.1355	-0.96494	87.5506	-0.0758664
13.521	151.39	11.135	-0.964334	87.5471	-0.0758188
13.5293	151.47	11.1346	-0.963697	87.5434	-0.0757687
13.5377	151.558	11.1341	-0.963058	87.5398	-0.0757185
13.546	151.641	11.1337	-0.962434	87.5361	-0.0756694
13.5543	151.726	11.1332	-0.961803	87.5327	-0.0756198
13.5627	151.806	11.1328	-0.961231	87.5292	-0.0755748
13.571	151.892	11.1323	-0.960655	87.5254	-0.0755295
13.5793	151.973	11.1318	-0.960031	87.5215	-0.0754805
13.5877	152.061	11.1313	-0.959408	87.5177	-0.0754315
13.596	152.144	11.1309	-0.958796	87.5141	-0.0753834
13.6043	152.226	11.1304	-0.958186	87.5106	-0.0753354
13.6127	152.31	11.13	-0.957586	87.5073	-0.0752883
13.621	152.397	11.1296	-0.956986	87.5041	-0.075241
13.6293	152.477	11.1292	-0.956336	87.5008	-0.07519
13.6377	152.564	11.1287	-0.955717	87.4974	-0.0751413
13.646	152.645	11.1282	-0.955058	87.4936	-0.0750895
13.6543	152.733	11.1278	-0.954403	87.4901	-0.075038
13.6627	152.812	11.1274	-0.953799	87.4868	-0.0749905
13.671	152.9	11.127	-0.953197	87.4836	-0.0749432
13.6793	152.986	11.1266	-0.952581	87.4803	-0.0748948
13.6877	153.066	11.1261	-0.951959	87.4769	-0.0748458
13.696	153.151	11.1257	-0.951362	87.4734	-0.0747989
13.7043	153.233	11.1252	-0.950754	87.4699	-0.0747511
13.7127	153.318	11.1248	-0.950162	87.4662	-0.0747046
13.721	153.404	11.1243	-0.949559	87.4629	-0.0746571
13.7293	153.489	11.1239	-0.948954	87.4596	-0.0746096
13.7377	153.569	11.1235	-0.948333	87.4563	-0.0745607
13.746	153.655	11.1231	-0.947689	87.4529	-0.0745102
13.7543	153.739	11.1226	-0.947024	87.4495	-0.0744578
13.7627	153.824	11.1222	-0.946383	87.4462	-0.0744074
13.771	153.909	11.1218	-0.945743	87.4427	-0.0743572
13.7793	153.992	11.1214	-0.945082	87.4396	-0.0743051
13.7877	154.076	11.121	-0.944446	87.4362	-0.0742551
13.796	154.16	11.1205	-0.943798	87.4327	-0.0742042
13.8043	154.241	11.1201	-0.943154	87.4294	-0.0741536
13.8127	154.331	11.1197	-0.942516	87.4261	-0.0741034
13.821	154.414	11.1192	-0.94188	87.4226	-0.0740534
13.8293	154.497	11.1188	-0.941267	87.4195	-0.0740052
13.8377	154.58	11.1184	-0.94068	87.416	-0.073959
13.846	154.664	11.1179	-0.940065	87.4125	-0.0739107
13.8543	154.745	11.1175	-0.939442	87.4091	-0.0738617
13.8627	154.834	11.1171	-0.938821	87.4056	-0.0738129
13.871	154.915	11.1166	-0.93818	87.4024	-0.0737625
13.8793	155.005	11.1163	-0.937547	87.3993	-0.0737127
13.8877	155.087	11.1158	-0.936891	87.3957	-0.0736611
13.896	155.166	11.1154	-0.936286	87.3927	-0.0736136
13.9043	155.253	11.115	-0.935695	87.3896	-0.0735671
13.9127	155.338	11.1146	-0.935076	87.3862	-0.0735184
13.921	155.419	11.1142	-0.934445	87.383	-0.0734689
13.9293	155.504	11.1138	-0.933824	87.3797	-0.07342
13.9377	155.589	11.1134	-0.933191	87.3765	-0.0733702
13.946	155.67	11.1129	-0.932583	87.3731	-0.0733225
13.9543	155.757	11.1125	-0.931969	87.3696	-0.0732742
13.9627	155.841	11.112	-0.931353	87.3662	-0.0732257
13.971	155.923	11.1116	-0.930764	87.363	-0.0731795
13.9793	156.009	11.1112	-0.930122	87.3596	-0.0731289
13.9877	156.092	11.1108	-0.929466	87.3562	-0.0730774
13.996	156.179	11.1104	-0.92882	87.3529	-0.0730266
14.0043	156.259	11.1099	-0.92818	87.3496	-0.0729762
14.0127	156.342	11.1096	-0.927512	87.3466	-0.0729237
14.021	156.428	11.1091	-0.92685	87.3433	-0.0728717
14.0293	156.509	11.1087	-0.926203	87.3401	-0.0728208
14.0377	156.599	11.1083	-0.92559	87.3371	-0.0727726
14.046	156.681	11.108	-0.924987	87.334	-0.0727252
14.0543	156.766	11.1075	-0.924347	87.3308	-0.0726749
14.0627	156.847	11.1071	-0.923724	87.3276	-0.0726259
14.071	156.935	11.1067	-0.923116	87.3246	-0.0725781
14.0793	157.017	11.1063	-0.922492	87.3213	-0.072529
14.0877	157.105	11.1059	-0.921877	87.3181	-0.0724807
14.096	157.187	11.1055	-0.921291	87.315	-0.0724347
14.1043	157.269	11.1051	-0.920702	87.3118	-0.0723883
14.1127	157.354	11.1047	-0.92008	87.3086	-0.0723394
14.121	157.438	11.1043	-0.91946	87.3052	-0.0722907
14.1293	157.519	11.1039	-0.918841	87.3019	-0.072242
14.1377	157.603	11.1034	-0.91827	87.2985	-0.0721971
14.146	157.687	11.103	-0.917652	87.2952	-0.0721485
14.1543	157.77	11.1026	-0.917014	87.2919	-0.0720984
14.1627	157.855	11.1022	-0.916401	87.2888	-0.0720501
14.171	157.939	11.1018	-0.915767	87.2856	-0.0720003
14.1793	158.027	11.1014	-0.915138	87.2822	-0.0719508
14.1877	158.106	11.101	-0.914507	87.2792	-0.0719013
14.196	158.194	11.1006	-0.913879	87.2761	-0.0718519
14.2043	158.28	11.1002	-0.913259	87.2731	-0.0718032
14.2127	158.362	11.0998	-0.912635	87.2701	-0.071754
14.221	158.447	11.0994	-0.911957	87.267	-0.0717008
14.2293	158.532	11.0991	-0.911348	87.264	-0.0716529
14.2377	158.615	11.0987	-0.910748	87.261	-0.0716057
14.246	158.698	11.0983	-0.910128	87.258	-0.0715569
14.2543	158.78	11.0979	-0.909504	87.2548	-0.0715079
14.2627	158.863	11.0975	-0.908883	87.2517	-0.0714591
14.271	158.952	11.0971	-0.908302	87.2484	-0.0714134
14.2793	159.035	11.0967	-0.907718	87.2452	-0.0713675
14.2877	159.115	11.0962	-0.907087	87.2419	-0.0713178
14.296	159.2	11.0958	-0.906484	87.2384	-0.0712705
14.3043	159.284	11.0954	-0.905904	87.235	-0.0712249
14.3127	159.368	11.095	-0.90528	87.2319	-0.0711758
14.321	159.451	11.0946	-0.904658	87.2287	-0.0711269
14.3293	159.536	11.0941	-0.904058	87.2253	-0.0710797
14.3377	159.622	11.0937	-0.90348	87.2221	-0.0710343
14.346	159.707	11.0933	-0.902856	87.2191	-0.0709852
14.3543	159.789	11.093	-0.902231	87.2161	-0.0709361
14.3627	159.877	11.0925	-0.901633	87.2129	-0.070889
14.371	159.959	11.0922	-0.901039	87.2102	-0.0708423
14.3793	160.04	11.0918	-0.900403	87.2073	-0.0707924
14.3877	160.121	11.0915	-0.899797	87.2046	-0.0707447
14.396	160.206	11.0911	-0.899227	87.2016	-0.0706999
14.4043	160.29	11.0907	-0.898676	87.1987	-0.0706566
14.4127	160.376	11.0904	-0.898094	87.1958	-0.0706108
14.421	160.461	11.09	-0.897511	87.1928	-0.070565
14.4293	160.543	11.0896	-0.896927	87.1896	-0.0705191
14.4377	160.629	11.0892	-0.896345	87.1866	-0.0704733
14.446	160.71	11.0888	-0.895746	87.1837	-0.0704262
14.4543	160.796	11.0885	-0.895173	87.1808	-0.0703812
14.4627	160.88	11.0881	-0.894585	87.1779	-0.0703349
14.471	160.961	11.0877	-0.893993	87.1747	-0.0702884
14.4793	161.048	11.0873	-0.893384	87.1717	-0.0702405
14.4877	161.132	11.0869	-0.89275	87.1687	-0.0701906
14.496	161.217	11.0866	-0.89214	87.1658	-0.0701427
14.5043	161.297	11.0862	-0.89154	87.1629	-0.0700955
14.5127	161.381	11.0858	-0.890994	87.16	-0.0700526
14.521	161.467	11.0854	-0.890413	87.157	-0.0700069
14.5293	161.554	11.0851	-0.889816	87.154	-0.06996
14.5377	161.639	11.0847	-0.889205	87.1509	-0.069912
14.546	161.722	11.0843	-0.888636	87.1481	-0.0698672
14.5543	161.805	11.0839	-0.888043	87.145	-0.0698206
14.5627	161.89	11.0835	-0.887491	87.1418	-0.0697772
14.571	161.97	11.0831	-0.886889	87.1389	-0.0697299
14.5793	162.057	11.0827	-0.886325	87.1358	-0.0696855
14.5877	162.142	11.0823	-0.885754	87.1327	-0.0696406
14.596	162.223	11.082	-0.88516	87.1299	-0.0695939
14.6043	162.308	11.0816	-0.884566	87.1268	-0.0695472
14.6127	162.394	11.0812	-0.883987	87.1237	-0.0695017
14.621	162.478	11.0808	-0.883411	87.1207	-0.0694564
14.6293	162.563	11.0804	-0.882862	87.1177	-0.0694132
14.6377	162.638	11.0801	-0.882319	87.1148	-0.0693705
14.646	162.728	11.0797	-0.881748	87.112	-0.0693257
14.6543	162.813	11.0793	-0.881223	87.1091	-0.0692844
14.6627	162.897	11.079	-0.880667	87.1061	-0.0692406
14.671	162.979	11.0786	-0.880098	87.1032	-0.0691959
14.6793	163.067	11.0782	-0.879506	87.1003	-0.0691494
14.6877	163.15	11.0779	-0.878953	87.0974	-0.0691059
14.696	163.232	11.0775	-0.878393	87.0947	-0.0690619
14.7043	163.315	11.0771	-0.877838	87.0918	-0.0690182
14.7127	163.394	11.0768	-0.877272	87.089	-0.0689737
14.721	163.481	11.0764	-0.876723	87.0863	-0.0689305
14.7293	163.567	11.0761	-0.876176	87.0833	-0.0688875
14.7377	163.65	11.0757	-0.875616	87.0805	-0.0688435
14.746	163.736	11.0754	-0.875062	87.0778	-0.0688
14.7543	163.821	11.075	-0.874528	87.0751	-0.0687579
14.7627	163.903	11.0746	-0.874027	87.0721	-0.0687186
14.771	163.983	11.0743	-0.873503	87.0691	-0.0686774
14.7793	164.074	11.0739	-0.872964	87.0664	-0.068635
14.7877	164.154	11.0735	-0.872422	87.0635	-0.0685924
14.796	164.243	11.0732	-0.871869	87.0605	-0.0685489
14.8043	164.325	11.0728	-0.871288	87.0576	-0.0685032
14.8127	164.413	11.0724	-0.870722	87.0549	-0.0684587
14.821	164.494	11.0721	-0.870187	87.0517	-0.0684167
14.8293	164.577	11.0717	-0.869627	87.0488	-0.0683727
14.8377	164.661	11.0713	-0.869101	87.0462	-0.0683313
14.846	164.748	11.071	-0.868565	87.0436	-0.0682891
14.8543	164.827	11.0707	-0.868008	87.0408	-0.0682453
14.8627	164.913	11.0703	-0.867496	87.0379	-0.0682051
14.871	164.997	11.0699	-0.867007	87.0351	-0.0681667
14.8793	165.08	11.0696	-0.866493	87.0322	-0.0681262
14.8877	165.164	11.0692	-0.865971	87.0293	-0.0680852
14.896	165.251	11.0688	-0.865407	87.0266	-0.0680409
14.9043	165.337	11.0685	-0.864879	87.024	-0.0679993
14.9127	165.42	11.0682	-0.864375	87.0212	-0.0679597
14.921	165.501	11.0678	-0.863815	87.0182	-0.0679157
14.9293	165.591	11.0674	-0.863252	87.0152	-0.0678715
14.9377	165.669	11.0671	-0.86274	87.0124	-0.0678312
14.946	165.757	11.0667	-0.862225	87.0098	-0.0677907
14.9543	165.836	11.0664	-0.861675	87.007	-0.0677474
14.9627	165.921	11.066	-0.861151	87.0043	-0.0677063
14.971	166.004	11.0657	-0.860624	87.0016	-0.0676648
14.9793	166.091	11.0653	-0.860121	86.9987	-0.0676253
14.9877	166.171	11.0649	-0.859611	86.9958	-0.0675852
14.996	166.256	11.0645	-0.859095	86.9925	-0.0675446
15.0043	166.34	11.0641	-0.858588	86.9894	-0.0675047
15.0127	166.424	11.0638	-0.858078	86.9866	-0.0674646
15.021	166.504	11.0634	-0.857562	86.9837	-0.0674241
15.0293	166.594	11.063	-0.857033	86.9807	-0.0673825
15.0377	166.677	11.0626	-0.856522	86.9778	-0.0673423
15.046	166.763	11.0623	-0.856006	86.9751	-0.0673017
15.0543	166.848	11.062	-0.85552	86.9724	-0.0672635
15.0627	166.931	11.0616	-0.855012	86.9696	-0.0672236
15.071	167.014	11.0612	-0.854457	86.9667	-0.0671799
15.0793	167.095	11.0609	-0.853926	86.9642	-0.0671382
15.0877	167.181	11.0606	-0.853409	86.9616	-0.0670975
15.096	167.262	11.0602	-0.852931	86.959	-0.0670599
15.1043	167.346	11.0599	-0.852399	86.9563	-0.0670181
15.1127	167.43	11.0595	-0.851867	86.9535	-0.0669763
15.121	167.52	11.0592	-0.85136	86.9507	-0.0669364
15.1293	167.605	11.0588	-0.850859	86.9478	-0.0668971
15.1377	167.684	11.0585	-0.850356	86.9449	-0.0668575
15.146	167.769	11.0581	-0.849837	86.9421	-0.0668167
15.1543	167.852	11.0578	-0.849362	86.9395	-0.0667794
15.1627	167.938	11.0574	-0.848886	86.9369	-0.066742
15.171	168.018	11.0571	-0.848386	86.9341	-0.0667026
15.1793	168.105	11.0567	-0.847872	86.9309	-0.0666622
15.1877	168.19	11.0563	-0.847386	86.928	-0.066624
15.196	168.275	11.056	-0.846881	86.9254	-0.0665843
15.2043	168.359	11.0557	-0.846371	86.9229	-0.0665442
15.2127	168.438	11.0553	-0.845863	86.9201	-0.0665042
15.221	168.522	11.055	-0.845361	86.9175	-0.0664648
15.2293	168.612	11.0547	-0.844901	86.9149	-0.0664286
15.2377	168.693	11.0543	-0.844419	86.9123	-0.0663907
15.246	168.779	11.054	-0.843908	86.9096	-0.0663506
15.2543	168.858	11.0536	-0.843405	86.9071	-0.066311
15.2627	168.939	11.0534	-0.842897	86.9049	-0.0662711
15.271	169.03	11.0531	-0.84239	86.9024	-0.0662312
15.2793	169.11	11.0527	-0.841927	86.8996	-0.0661948
15.2877	169.196	11.0524	-0.841462	86.8969	-0.0661582
15.296	169.283	11.052	-0.840979	86.8941	-0.0661202
15.3043	169.362	11.0517	-0.840478	86.8914	-0.0660809
15.3127	169.444	11.0513	-0.839997	86.8884	-0.066043
15.321	169.528	11.0509	-0.839506	86.8858	-0.0660045
15.3293	169.617	11.0506	-0.838992	86.8833	-0.065964
15.3377	169.697	11.0503	-0.838494	86.8806	-0.0659249
15.346	169.786	11.05	-0.838021	86.878	-0.0658877
15.3543	169.867	11.0496	-0.837557	86.8752	-0.0658512
15.3627	169.953	11.0493	-0.837073	86.8725	-0.0658132
15.371	170.036	11.0489	-0.836555	86.8697	-0.0657724
15.3793	170.12	11.0486	-0.836056	86.8672	-0.0657332
15.3877	170.203	11.0482	-0.835578	86.8646	-0.0656956
15.396	170.286	11.0479	-0.835073	86.8622	-0.0656559
15.4043	170.371	11.0476	-0.834589	86.8595	-0.0656178
15.4127	170.456	11.0472	-0.834116	86.8567	-0.0655806
15.421	170.539	11.0469	-0.833655	86.8539	-0.0655444
15.4293	170.627	11.0465	-0.833156	86.8512	-0.0655052
15.4377	170.708	11.0462	-0.832652	86.8487	-0.0654656
15.446	170.794	11.0459	-0.832158	86.8461	-0.0654267
15.4543	170.876	11.0456	-0.831685	86.8434	-0.0653895
15.4627	170.958	11.0452	-0.831213	86.8406	-0.0653524
15.471	171.043	11.0449	-0.830717	86.8381	-0.0653135
15.4793	171.129	11.0445	-0.830229	86.8354	-0.065275
15.4877	171.211	11.0442	-0.829765	86.8329	-0.0652386
15.496	171.296	11.0439	-0.829298	86.8305	-0.0652019
15.5043	171.374	11.0436	-0.82882	86.828	-0.0651643
15.5127	171.46	11.0433	-0.828353	86.8253	-0.0651276
15.521	171.548	11.0429	-0.827873	86.8227	-0.0650899
15.5293	171.63	11.0426	-0.827382	86.8203	-0.0650512
15.5377	171.714	11.0423	-0.826907	86.8176	-0.0650139
15.546	171.797	11.0419	-0.82644	86.8148	-0.0649771
15.5543	171.881	11.0416	-0.826016	86.8119	-0.0649439
15.5627	171.969	11.0412	-0.82554	86.8093	-0.0649064
15.571	172.047	11.0409	-0.825071	86.8068	-0.0648696
15.5793	172.133	11.0405	-0.824627	86.8039	-0.0648346
15.5877	172.216	11.0402	-0.824149	86.801	-0.0647971
15.596	172.304	11.0398	-0.823673	86.7983	-0.0647596
15.6043	172.386	11.0395	-0.823218	86.7957	-0.0647238
15.6127	172.472	11.0392	-0.82277	86.7932	-0.0646886
15.621	172.549	11.0389	-0.822318	86.7908	-0.064653
15.6293	172.632	11.0386	-0.821867	86.7884	-0.0646176
15.6377	172.722	11.0383	-0.821394	86.7862	-0.0645804
15.646	172.803	11.038	-0.820977	86.7838	-0.0645476
15.6543	172.89	11.0376	-0.82052	86.7812	-0.0645117
15.6627	172.975	11.0373	-0.820063	86.7784	-0.0644758
15.671	173.053	11.037	-0.819628	86.7759	-0.0644416
15.6793	173.14	11.0366	-0.819197	86.7733	-0.0644077
15.6877	173.224	11.0363	-0.818747	86.7707	-0.0643723
15.696	173.306	11.0359	-0.818299	86.7678	-0.0643371
15.7043	173.388	11.0356	-0.817844	86.765	-0.0643014
15.7127	173.472	11.0352	-0.817379	86.7623	-0.0642648
15.721	173.559	11.0349	-0.816909	86.7597	-0.0642278
15.7293	173.642	11.0345	-0.816429	86.7569	-0.0641901
15.7377	173.725	11.0342	-0.815984	86.7543	-0.0641551
15.746	173.807	11.0339	-0.815507	86.7519	-0.0641176
15.7543	173.891	11.0336	-0.815034	86.7496	-0.0640804
15.7627	173.976	11.0333	-0.814562	86.7472	-0.0640432
15.771	174.061	11.033	-0.814117	86.7447	-0.0640083
15.7793	174.142	11.0327	-0.813682	86.7423	-0.0639741
15.7877	174.229	11.0324	-0.813241	86.7397	-0.0639394
15.796	174.309	11.032	-0.812788	86.7372	-0.0639038
15.8043	174.393	11.0317	-0.812349	86.7347	-0.0638693
15.8127	174.48	11.0314	-0.811897	86.7324	-0.0638338
15.821	174.561	11.0311	-0.811417	86.7296	-0.063796
15.8293	174.642	11.0307	-0.81098	86.727	-0.0637616
15.8377	174.734	11.0305	-0.810558	86.7247	-0.0637285
15.846	174.814	11.0301	-0.810144	86.7222	-0.0636959
15.8543	174.896	11.0298	-0.809707	86.7195	-0.0636616
15.8627	174.98	11.0295	-0.80924	86.717	-0.0636248
15.871	175.064	11.0292	-0.808784	86.7145	-0.063589
15.8793	175.152	11.0289	-0.808354	86.7121	-0.0635552
15.8877	175.234	11.0285	-0.807896	86.7093	-0.0635192
15.896	175.319	11.0282	-0.807476	86.7067	-0.0634862
15.9043	175.402	11.0279	-0.80706	86.7043	-0.0634534
15.9127	175.483	11.0276	-0.806646	86.7019	-0.0634209
15.921	175.565	11.0272	-0.806219	86.6994	-0.0633873
15.9293	175.651	11.0269	-0.805761	86.6968	-0.0633513
15.9377	175.735	11.0266	-0.805315	86.6943	-0.0633163
15.946	175.819	11.0263	-0.804899	86.692	-0.0632835
15.9543	175.901	11.026	-0.804484	86.6897	-0.0632509
15.9627	175.986	11.0257	-0.804063	86.6873	-0.0632178
15.971	176.069	11.0254	-0.803665	86.6847	-0.0631865
15.9793	176.154	11.0251	-0.803243	86.6824	-0.0631534
15.9877	176.236	11.0248	-0.802822	86.68	-0.0631202
15.996	176.322	11.0245	-0.802386	86.6777	-0.0630859
16.0043	176.405	11.0241	-0.801968	86.6751	-0.0630531
16.0127	176.487	11.0238	-0.801562	86.6725	-0.0630212
16.021	176.573	11.0235	-0.801147	86.6701	-0.0629886
16.0293	176.655	11.0232	-0.800734	86.6677	-0.0629561
16.0377	176.739	11.0229	-0.80032	86.6649	-0.0629235
16.046	176.823	11.0225	-0.7999	86.6623	-0.0628905
16.0543	176.905	11.0222	-0.799474	86.6599	-0.062857
16.0627	176.989	11.0219	-0.799055	86.6574	-0.0628241
16.071	177.077	11.0216	-0.798649	86.6549	-0.0627922
16.0793	177.164	11.0212	-0.798224	86.6523	-0.0627587
16.0877	177.246	11.0209	-0.797801	86.6499	-0.0627254
16.096	177.325	11.0207	-0.797373	86.6477	-0.0626918
16.1043	177.407	11.0203	-0.79697	86.6452	-0.0626602
16.1127	177.489	11.02	-0.796574	86.6427	-0.062629
16.121	177.578	11.0198	-0.796166	86.6405	-0.0625969
16.1293	177.662	11.0195	-0.795731	86.6383	-0.0625627
16.1377	177.746	11.0192	-0.795297	86.6361	-0.0625286
16.146	177.826	11.0189	-0.794885	86.6337	-0.0624962
16.1543	177.91	11.0186	-0.794473	86.6313	-0.0624638
16.1627	177.999	11.0183	-0.79406	86.6289	-0.0624314
16.171	178.078	11.018	-0.793612	86.6266	-0.0623961
16.1793	178.164	11.0177	-0.793222	86.6244	-0.0623655
16.1877	178.248	11.0174	-0.792808	86.6221	-0.0623329
16.196	178.331	11.0171	-0.792393	86.6199	-0.0623003
16.2043	178.414	11.0168	-0.791962	86.6173	-0.0622664
16.2127	178.501	11.0165	-0.791547	86.6148	-0.0622338
16.221	178.585	11.0162	-0.791125	86.6123	-0.0622006
16.2293	178.665	11.0158	-0.790706	86.6098	-0.0621677
16.2377	178.749	11.0155	-0.790282	86.6073	-0.0621343
16.246	178.83	11.0152	-0.789879	86.605	-0.0621026
16.2543	178.915	11.0149	-0.789486	86.6024	-0.0620717
16.2627	179	11.0146	-0.789061	86.5999	-0.0620383
16.271	179.083	11.0143	-0.788652	86.5976	-0.0620062
16.2793	179.167	11.014	-0.788197	86.5953	-0.0619704
16.2877	179.253	11.0137	-0.787802	86.593	-0.0619393
16.296	179.338	11.0134	-0.78739	86.5907	-0.061907
16.3043	179.42	11.0131	-0.786983	86.5883	-0.0618749
16.3127	179.502	11.0128	-0.786558	86.5859	-0.0618415
16.321	179.587	11.0125	-0.786128	86.5835	-0.0618077
16.3293	179.667	11.0122	-0.785722	86.5811	-0.0617758
16.3377	179.752	11.0119	-0.785321	86.5787	-0.0617443
16.346	179.839	11.0116	-0.784954	86.5763	-0.0617154
16.3543	179.921	11.0113	-0.784555	86.5738	-0.061684
16.3627	180.007	11.0109	-0.784187	86.5712	-0.0616551
16.371	180.089	11.0106	-0.783771	86.5688	-0.0616224
16.3793	180.175	11.0103	-0.783393	86.5663	-0.0615927
16.3877	180.255	11.01	-0.783058	86.564	-0.0615663
16.396	180.342	11.0097	-0.782719	86.5617	-0.0615397
16.4043	180.421	11.0095	-0.782353	86.5596	-0.0615109
16.4127	180.511	11.0092	-0.781953	86.5574	-0.0614794
16.421	180.599	11.0088	-0.78157	86.5548	-0.0614493
16.4293	180.677	11.0085	-0.781159	86.5522	-0.061417
16.4377	180.761	11.0082	-0.780787	86.5498	-0.0613878
16.446	180.843	11.0079	-0.780423	86.5475	-0.0613592
16.4543	180.929	11.0076	-0.780061	86.5451	-0.0613307
16.4627	181.008	11.0073	-0.77967	86.5427	-0.0613
16.471	181.091	11.007	-0.779269	86.54	-0.0612685
16.4793	181.179	11.0066	-0.778868	86.5375	-0.0612369
16.4877	181.258	11.0063	-0.778478	86.5348	-0.0612063
16.496	181.346	11.006	-0.778103	86.5325	-0.0611768
16.5043	181.433	11.0057	-0.777744	86.5303	-0.0611486
16.5127	181.511	11.0054	-0.777376	86.528	-0.0611196
16.521	181.595	11.0052	-0.776975	86.526	-0.0610881
16.5293	181.684	11.0049	-0.776601	86.5236	-0.0610587
16.5377	181.766	11.0046	-0.776225	86.5214	-0.0610291
16.546	181.85	11.0043	-0.775867	86.5191	-0.061001
16.5543	181.929	11.004	-0.77548	86.5169	-0.0609705
16.5627	182.013	11.0038	-0.775105	86.515	-0.0609411
16.571	182.099	11.0035	-0.774729	86.5126	-0.0609115
16.5793	182.181	11.0032	-0.77436	86.5101	-0.0608825
16.5877	182.262	11.0029	-0.773966	86.5077	-0.0608515
16.596	182.348	11.0026	-0.773565	86.5055	-0.06082
16.6043	182.436	11.0023	-0.773201	86.503	-0.0607914
16.6127	182.515	11.002	-0.772805	86.5007	-0.0607603
16.621	182.596	11.0017	-0.772421	86.4984	-0.06073
16.6293	182.683	11.0014	-0.772052	86.4963	-0.060701
16.6377	182.766	11.0011	-0.771673	86.4939	-0.0606712
16.646	182.849	11.0008	-0.771269	86.4914	-0.0606394
[truncated: 9,850 more rows]
