# Supplementary material for: Comparative study on mechanisms for improving mechanical properties and microstructure of cement paste modified by different types of nanomaterials
Source: publisher site journal article supplement (doi:10.1515/ntrev-2021-0027), 2021-01-01
Supplement: Supplementary file 12 [file NG-0.03-7d.xlsx]

## Sheet: Sheet1
Time (min)	Temperature (°C)	Weight (mg)			Temperature Difference (°C/mg)
0.000666667	21.345	12.4214	-1.1857	100	-0.0954562
0.00433333	21.3855	12.4206	-1.17956	99.9931	-0.0949615
0.0126667	21.4359	12.4196	-1.17945	99.9849	-0.0949524
0.021	21.4758	12.4185	-1.17925	99.9767	-0.0949367
0.0293333	21.5178	12.4174	-1.17892	99.9678	-0.0949102
0.0376667	21.565	12.4164	-1.17845	99.9591	-0.0948721
0.046	21.6082	12.4153	-1.17788	99.9505	-0.0948267
0.0543333	21.6527	12.4142	-1.17724	99.9414	-0.0947744
0.0626667	21.6939	12.413	-1.17649	99.9321	-0.0947145
0.071	21.7337	12.4118	-1.17566	99.9223	-0.0946478
0.0793333	21.7808	12.4106	-1.17475	99.9124	-0.0945741
0.0876667	21.8164	12.4093	-1.17373	99.9024	-0.0944926
0.096	21.8562	12.4081	-1.17273	99.8923	-0.0944115
0.104333	21.9028	12.4068	-1.17169	99.8823	-0.0943276
0.112667	21.941	12.4056	-1.17071	99.8726	-0.0942489
0.121	21.9787	12.4044	-1.16977	99.8627	-0.0941738
0.129333	22.0213	12.4032	-1.16886	99.8529	-0.0941001
0.137667	22.0609	12.4019	-1.16801	99.8429	-0.0940315
0.146	22.1007	12.4007	-1.16714	99.8333	-0.0939617
0.154333	22.1391	12.3995	-1.1663	99.8234	-0.0938941
0.162667	22.1797	12.3983	-1.16553	99.8137	-0.0938318
0.171	22.2222	12.3971	-1.16477	99.8041	-0.0937706
0.179333	22.2579	12.3959	-1.16405	99.7945	-0.0937129
0.187667	22.3015	12.3947	-1.16339	99.785	-0.09366
0.196	22.3366	12.3935	-1.16277	99.7753	-0.0936102
0.204333	22.3752	12.3923	-1.1622	99.7655	-0.0935642
0.212667	22.4104	12.3911	-1.16163	99.7557	-0.0935181
0.221	22.4581	12.3899	-1.16101	99.7458	-0.0934683
0.229333	22.4925	12.3886	-1.16046	99.7358	-0.0934241
0.237667	22.5332	12.3874	-1.15995	99.726	-0.0933829
0.246	22.57	12.3862	-1.15944	99.716	-0.093342
0.254333	22.6064	12.3849	-1.159	99.7061	-0.0933067
0.262667	22.6394	12.3837	-1.15854	99.696	-0.0932695
0.271	22.6776	12.3824	-1.15812	99.6858	-0.0932359
0.279333	22.7148	12.3811	-1.15769	99.6754	-0.0932014
0.287667	22.7558	12.3799	-1.15729	99.6653	-0.0931691
0.296	22.7927	12.3786	-1.15693	99.6551	-0.0931395
0.304333	22.8293	12.3773	-1.15664	99.645	-0.0931163
0.312667	22.8663	12.3761	-1.15636	99.6348	-0.0930939
0.321	22.9032	12.3748	-1.15605	99.6244	-0.0930687
0.329333	22.9396	12.3735	-1.15573	99.6142	-0.0930435
0.337667	22.9732	12.3722	-1.15542	99.604	-0.0930183
0.346	22.9991	12.371	-1.15518	99.594	-0.0929985
0.354333	23.0387	12.3698	-1.15494	99.584	-0.0929799
0.362667	23.0783	12.3686	-1.1547	99.5743	-0.0929606
0.371	23.1147	12.3673	-1.15444	99.5641	-0.0929397
0.379333	23.1441	12.366	-1.15421	99.5539	-0.092921
0.387667	23.1773	12.3648	-1.15399	99.5439	-0.0929032
0.396	23.2123	12.3636	-1.1538	99.5342	-0.0928881
0.404333	23.2463	12.3624	-1.15362	99.5245	-0.0928735
0.412667	23.2799	12.3612	-1.15348	99.5147	-0.0928619
0.421	23.3187	12.3599	-1.15336	99.5046	-0.0928525
0.429333	23.3497	12.3586	-1.15325	99.4944	-0.0928438
0.437667	23.3804	12.3574	-1.15314	99.4841	-0.0928344
0.446	23.414	12.3561	-1.15302	99.474	-0.0928252
0.454333	23.4599	12.3548	-1.15294	99.4638	-0.0928186
0.462667	23.4812	12.3536	-1.15286	99.4537	-0.0928122
0.471	23.5174	12.3523	-1.15279	99.4436	-0.0928068
0.479333	23.5509	12.3511	-1.15271	99.4336	-0.0927999
0.487667	23.587	12.3498	-1.15264	99.4233	-0.0927946
0.496	23.6242	12.3485	-1.15255	99.413	-0.0927872
0.504333	23.6563	12.3473	-1.15251	99.403	-0.0927842
0.512667	23.6881	12.346	-1.15246	99.393	-0.0927801
0.521	23.717	12.3448	-1.15243	99.3829	-0.0927776
0.529333	23.7472	12.3436	-1.15243	99.3729	-0.0927773
0.537667	23.7825	12.3423	-1.15245	99.363	-0.0927793
0.546	23.8244	12.3411	-1.15249	99.3531	-0.0927822
0.554333	23.8564	12.3398	-1.15249	99.3431	-0.092782
0.562667	23.8854	12.3386	-1.15251	99.3328	-0.0927838
0.571	23.9218	12.3373	-1.15257	99.3229	-0.092789
0.579333	23.9582	12.3361	-1.15266	99.3132	-0.0927958
0.587667	23.9884	12.3349	-1.15272	99.303	-0.0928005
0.596	24.028	12.3337	-1.15281	99.2933	-0.0928077
0.604333	24.0569	12.3325	-1.15288	99.2837	-0.0928138
0.612667	24.0931	12.3312	-1.15296	99.2738	-0.09282
0.621	24.1295	12.33	-1.15308	99.2637	-0.0928295
0.629333	24.1677	12.3287	-1.15317	99.2538	-0.0928372
0.637667	24.1954	12.3275	-1.15328	99.2439	-0.092846
0.646	24.2358	12.3263	-1.15339	99.234	-0.0928552
0.654333	24.266	12.325	-1.15353	99.224	-0.0928662
0.662667	24.3054	12.3238	-1.15365	99.2139	-0.092876
0.671	24.3395	12.3225	-1.15378	99.2039	-0.0928863
0.679333	24.3742	12.3213	-1.15388	99.1937	-0.0928944
0.687667	24.4044	12.32	-1.15402	99.1836	-0.0929052
0.696	24.4472	12.3188	-1.15416	99.1738	-0.0929168
0.704333	24.4848	12.3176	-1.15426	99.164	-0.0929247
0.712667	24.5233	12.3164	-1.15439	99.1542	-0.0929354
0.721	24.5559	12.3152	-1.15451	99.1444	-0.0929447
0.729333	24.5918	12.3139	-1.15461	99.1344	-0.092953
0.737667	24.6283	12.3127	-1.1547	99.1246	-0.0929598
0.746	24.6723	12.3115	-1.15482	99.1152	-0.0929696
0.754333	24.7024	12.3104	-1.15492	99.106	-0.0929779
0.762667	24.7446	12.3092	-1.15503	99.0967	-0.0929865
0.771	24.7806	12.3081	-1.15512	99.0874	-0.092994
0.779333	24.8241	12.3069	-1.15526	99.0779	-0.0930052
0.787667	24.8669	12.3057	-1.15542	99.0685	-0.0930182
0.796	24.9047	12.3045	-1.15561	99.0589	-0.0930333
0.804333	24.9427	12.3034	-1.15582	99.0495	-0.0930506
0.812667	24.9826	12.3023	-1.15607	99.0404	-0.0930709
0.821	25.022	12.3011	-1.15634	99.0312	-0.0930923
0.829333	25.0675	12.2999	-1.15661	99.0216	-0.0931142
0.837667	25.1074	12.2987	-1.15687	99.012	-0.0931345
0.846	25.1456	12.2975	-1.15715	99.0022	-0.0931572
0.854333	25.1845	12.2963	-1.15745	98.9924	-0.0931812
0.862667	25.2313	12.2951	-1.15772	98.983	-0.0932034
0.871	25.2684	12.294	-1.15796	98.9736	-0.093223
0.879333	25.3111	12.2928	-1.15818	98.9645	-0.0932407
0.887667	25.3535	12.2916	-1.15847	98.9549	-0.0932641
0.896	25.4038	12.2904	-1.15878	98.9454	-0.0932887
0.904333	25.4444	12.2893	-1.15907	98.936	-0.0933116
0.912667	25.4905	12.2881	-1.15932	98.9267	-0.0933324
0.921	25.5321	12.287	-1.15963	98.9178	-0.0933574
0.929333	25.5826	12.2859	-1.15992	98.9088	-0.0933803
0.937667	25.6236	12.2848	-1.16027	98.9	-0.0934084
0.946	25.678	12.2837	-1.16064	98.8909	-0.0934381
0.954333	25.7213	12.2825	-1.16103	98.8816	-0.0934697
0.962667	25.7657	12.2814	-1.16143	98.8723	-0.093502
0.971	25.8114	12.2803	-1.16176	98.8633	-0.0935282
0.979333	25.8605	12.2791	-1.16205	98.8545	-0.0935518
0.987667	25.9029	12.278	-1.16239	98.8455	-0.0935789
0.996	25.9553	12.2769	-1.16273	98.8364	-0.0936067
1.00433	25.9947	12.2758	-1.16309	98.8274	-0.0936359
1.01267	26.0476	12.2747	-1.16347	98.8183	-0.0936664
1.021	26.0883	12.2735	-1.16375	98.8092	-0.0936885
1.02933	26.1419	12.2724	-1.16409	98.8001	-0.0937163
1.03767	26.1883	12.2713	-1.16444	98.791	-0.0937444
1.046	26.2445	12.2701	-1.16479	98.782	-0.0937722
1.05433	26.2953	12.269	-1.16517	98.7728	-0.093803
1.06267	26.344	12.2678	-1.16558	98.7634	-0.093836
1.071	26.399	12.2667	-1.16595	98.7543	-0.093866
1.07933	26.448	12.2656	-1.16638	98.7452	-0.0939006
1.08767	26.5019	12.2644	-1.16677	98.736	-0.0939318
1.096	26.5529	12.2633	-1.16717	98.7266	-0.0939643
1.10433	26.6052	12.2622	-1.16767	98.7176	-0.0940042
1.11267	26.6661	12.261	-1.16807	98.7088	-0.0940364
1.121	26.7183	12.26	-1.16847	98.7	-0.094069
1.12933	26.7665	12.2589	-1.16891	98.6911	-0.0941044
1.13767	26.8194	12.2578	-1.16934	98.6824	-0.0941388
1.146	26.884	12.2567	-1.16979	98.6737	-0.0941754
1.15433	26.9378	12.2556	-1.17029	98.6651	-0.0942156
1.16267	26.9887	12.2545	-1.17073	98.6562	-0.0942506
1.171	27.0498	12.2535	-1.1712	98.6476	-0.0942887
1.17933	27.1064	12.2524	-1.17171	98.639	-0.0943296
1.18767	27.1695	12.2513	-1.17217	98.6302	-0.0943665
1.196	27.2218	12.2502	-1.17269	98.6211	-0.0944083
1.20433	27.2799	12.2491	-1.17323	98.6122	-0.094452
1.21267	27.3377	12.2479	-1.17377	98.6033	-0.0944956
1.221	27.3966	12.2469	-1.17437	98.5944	-0.0945437
1.22933	27.4589	12.2457	-1.17491	98.5853	-0.094587
1.23767	27.5148	12.2446	-1.17542	98.5765	-0.0946284
1.246	27.5795	12.2435	-1.17601	98.5676	-0.0946756
1.25433	27.6383	12.2424	-1.17659	98.5587	-0.0947224
1.26267	27.6966	12.2413	-1.1771	98.5496	-0.0947638
1.271	27.7586	12.2402	-1.17764	98.5408	-0.0948069
1.27933	27.8225	12.2391	-1.1782	98.532	-0.0948518
1.28767	27.8781	12.238	-1.17876	98.5229	-0.0948969
1.296	27.9421	12.2368	-1.1793	98.5138	-0.0949407
1.30433	28.0082	12.2357	-1.17985	98.5049	-0.0949852
1.31267	28.071	12.2346	-1.18045	98.4959	-0.0950335
1.321	28.1298	12.2335	-1.18109	98.4866	-0.0950847
1.32933	28.1935	12.2323	-1.18168	98.4776	-0.095132
1.33767	28.2573	12.2312	-1.18228	98.4688	-0.0951803
1.346	28.3228	12.2302	-1.18296	98.4601	-0.095235
1.35433	28.3852	12.2291	-1.18362	98.4513	-0.0952889
1.36267	28.4592	12.228	-1.18428	98.4424	-0.0953419
1.371	28.5228	12.2269	-1.18494	98.4334	-0.0953943
1.37933	28.5843	12.2258	-1.18564	98.4248	-0.095451
1.38767	28.658	12.2247	-1.1863	98.4161	-0.0955045
1.396	28.7253	12.2236	-1.18701	98.4077	-0.0955617
1.40433	28.7913	12.2226	-1.1877	98.3994	-0.0956173
1.41267	28.8551	12.2215	-1.18841	98.3906	-0.0956739
1.421	28.9283	12.2204	-1.18913	98.3814	-0.0957322
1.42933	28.9981	12.2193	-1.18986	98.3723	-0.0957911
1.43767	29.0635	12.2182	-1.19061	98.3635	-0.095851
1.446	29.1366	12.2171	-1.19135	98.3548	-0.0959106
1.45433	29.2059	12.216	-1.19212	98.3461	-0.0959729
1.46267	29.2778	12.2149	-1.19288	98.3371	-0.096034
1.471	29.3456	12.2138	-1.19364	98.3281	-0.0960947
1.47933	29.4159	12.2127	-1.19437	98.3191	-0.0961537
1.48767	29.4889	12.2115	-1.19513	98.31	-0.0962153
1.496	29.5602	12.2104	-1.19593	98.3014	-0.0962798
1.50433	29.6294	12.2094	-1.19674	98.2928	-0.0963445
1.51267	29.6979	12.2083	-1.1975	98.2841	-0.0964057
1.521	29.7696	12.2072	-1.1983	98.2751	-0.0964701
1.52933	29.8448	12.2061	-1.19913	98.2661	-0.0965371
1.53767	29.922	12.205	-1.19996	98.2571	-0.0966036
1.546	29.9944	12.2038	-1.20075	98.2482	-0.0966675
1.55433	30.0721	12.2027	-1.20161	98.2393	-0.0967367
1.56267	30.146	12.2016	-1.2025	98.2304	-0.096808
1.571	30.2154	12.2005	-1.20337	98.2215	-0.0968786
1.57933	30.2947	12.1994	-1.20423	98.2124	-0.096948
1.58767	30.3708	12.1983	-1.20508	98.2034	-0.0970165
1.596	30.4459	12.1972	-1.20598	98.1945	-0.0970883
1.60433	30.5181	12.1961	-1.20685	98.1856	-0.0971588
1.61267	30.5953	12.1949	-1.20769	98.1765	-0.0972266
1.621	30.6735	12.1938	-1.20856	98.1677	-0.097296
1.62933	30.7492	12.1928	-1.20949	98.1589	-0.0973712
1.63767	30.8201	12.1917	-1.21036	98.1501	-0.0974408
1.646	30.904	12.1906	-1.21117	98.1413	-0.0975061
1.65433	30.9786	12.1895	-1.21201	98.1323	-0.0975744
1.66267	31.054	12.1883	-1.21291	98.1234	-0.0976466
1.671	31.1326	12.1872	-1.21385	98.1144	-0.0977218
1.67933	31.2154	12.1861	-1.21477	98.1057	-0.0977966
1.68767	31.2975	12.185	-1.2157	98.0968	-0.0978713
1.696	31.3733	12.1839	-1.21667	98.0878	-0.0979488
1.70433	31.4533	12.1828	-1.21762	98.079	-0.0980258
1.71267	31.532	12.1817	-1.21857	98.0698	-0.098102
1.721	31.6104	12.1805	-1.21956	98.0605	-0.0981819
1.72933	31.6876	12.1794	-1.22061	98.0514	-0.0982664
1.73767	31.7712	12.1783	-1.22161	98.0423	-0.0983469
1.746	31.8504	12.1771	-1.22259	98.0333	-0.0984261
1.75433	31.9307	12.176	-1.22356	98.0243	-0.098504
1.76267	32.0113	12.1749	-1.2246	98.0149	-0.0985873
1.771	32.0935	12.1737	-1.22561	98.0057	-0.0986685
1.77933	32.1713	12.1726	-1.22664	97.9966	-0.0987522
1.78767	32.2546	12.1715	-1.22769	97.9874	-0.0988364
1.796	32.3352	12.1703	-1.22874	97.9784	-0.098921
1.80433	32.416	12.1692	-1.2298	97.9695	-0.0990061
1.81267	32.5056	12.1681	-1.23079	97.9604	-0.0990862
1.821	32.5877	12.1669	-1.23186	97.9512	-0.0991721
1.82933	32.677	12.1658	-1.23294	97.9419	-0.0992593
1.83767	32.7563	12.1646	-1.23401	97.9326	-0.0993448
1.846	32.8343	12.1635	-1.23506	97.9235	-0.0994294
1.85433	32.9237	12.1624	-1.23613	97.9145	-0.0995161
1.86267	33.0059	12.1613	-1.23716	97.9056	-0.0995991
1.871	33.0849	12.1601	-1.23823	97.8963	-0.0996849
1.87933	33.1727	12.159	-1.23927	97.887	-0.0997683
1.88767	33.2579	12.1578	-1.24029	97.8775	-0.0998505
1.896	33.3387	12.1566	-1.24139	97.8682	-0.0999394
1.90433	33.4256	12.1555	-1.2425	97.8589	-0.100028
1.91267	33.509	12.1543	-1.2436	97.8495	-0.100117
1.921	33.5974	12.1532	-1.2447	97.8402	-0.100206
1.92933	33.68	12.152	-1.24577	97.8307	-0.100292
1.93767	33.7705	12.1508	-1.24688	97.8211	-0.100381
1.946	33.8522	12.1496	-1.24802	97.8116	-0.100473
1.95433	33.9374	12.1484	-1.24913	97.8022	-0.100563
1.96267	34.0214	12.1473	-1.2503	97.793	-0.100657
1.971	34.1061	12.1462	-1.25151	97.7839	-0.100754
1.97933	34.1992	12.145	-1.25267	97.7748	-0.100847
1.98767	34.2837	12.1439	-1.25379	97.7658	-0.100938
1.996	34.3736	12.1428	-1.25491	97.7566	-0.101028
2.00433	34.4542	12.1416	-1.25607	97.7474	-0.101121
2.01267	34.5401	12.1405	-1.25727	97.7383	-0.101218
2.021	34.6272	12.1393	-1.25841	97.7288	-0.101309
2.02933	34.7115	12.1382	-1.25955	97.7196	-0.101401
2.03767	34.7997	12.137	-1.26073	97.7104	-0.101496
2.046	34.8885	12.1359	-1.26187	97.7012	-0.101588
2.05433	34.9783	12.1347	-1.26301	97.6915	-0.10168
2.06267	35.0674	12.1335	-1.26417	97.6821	-0.101773
2.071	35.152	12.1323	-1.26534	97.6726	-0.101868
2.07933	35.239	12.1311	-1.26649	97.663	-0.10196
2.08767	35.3216	12.13	-1.26765	97.6537	-0.102053
2.096	35.4116	12.1289	-1.26879	97.6446	-0.102145
2.10433	35.4988	12.1277	-1.26999	97.6351	-0.102242
2.11267	35.588	12.1265	-1.27114	97.6256	-0.102334
2.121	35.6741	12.1253	-1.27226	97.6159	-0.102424
2.12933	35.7611	12.1241	-1.27339	97.6061	-0.102516
2.13767	35.8525	12.1229	-1.27452	97.5967	-0.102607
2.146	35.9393	12.1217	-1.27568	97.5872	-0.1027
2.15433	36.0348	12.1206	-1.2768	97.5781	-0.10279
2.16267	36.1192	12.1195	-1.27799	97.5689	-0.102886
2.171	36.2066	12.1183	-1.27918	97.5595	-0.102982
2.17933	36.298	12.1171	-1.28034	97.5502	-0.103075
2.18767	36.3849	12.116	-1.28148	97.5409	-0.103167
2.196	36.4729	12.1148	-1.28265	97.5314	-0.103261
2.20433	36.5631	12.1137	-1.28385	97.5222	-0.103357
2.21267	36.6504	12.1125	-1.28506	97.5128	-0.103455
2.221	36.7407	12.1113	-1.28626	97.5035	-0.103551
2.22933	36.8294	12.1102	-1.28743	97.494	-0.103646
2.23767	36.9129	12.109	-1.28865	97.4843	-0.103744
2.246	37.0116	12.1078	-1.28983	97.4748	-0.103839
2.25433	37.0942	12.1066	-1.291	97.4653	-0.103933
2.26267	37.1828	12.1054	-1.29218	97.4558	-0.104028
2.271	37.2799	12.1042	-1.2934	97.4462	-0.104126
2.27933	37.3631	12.103	-1.29459	97.4367	-0.104222
2.28767	37.4567	12.1019	-1.29576	97.4272	-0.104316
2.296	37.5457	12.1007	-1.2969	97.4175	-0.104408
2.30433	37.6309	12.0994	-1.29805	97.4077	-0.104501
2.31267	37.7206	12.0983	-1.29921	97.3981	-0.104594
2.321	37.8169	12.0971	-1.30037	97.3886	-0.104687
2.32933	37.9034	12.0959	-1.30151	97.3791	-0.104779
2.33767	37.9847	12.0947	-1.30264	97.3693	-0.10487
2.346	38.0829	12.0934	-1.30376	97.3593	-0.104961
2.35433	38.1647	12.0922	-1.30489	97.3497	-0.105051
2.36267	38.2594	12.0911	-1.30599	97.3402	-0.10514
2.371	38.3474	12.0899	-1.30711	97.3307	-0.10523
2.37933	38.4432	12.0887	-1.30822	97.3212	-0.10532
2.38767	38.5248	12.0875	-1.30936	97.3119	-0.105411
2.396	38.6207	12.0863	-1.31047	97.3022	-0.105501
2.40433	38.7124	12.0852	-1.31157	97.2927	-0.10559
2.41267	38.7974	12.084	-1.31269	97.2831	-0.105679
2.421	38.8886	12.0828	-1.31381	97.2737	-0.10577
2.42933	38.9802	12.0817	-1.31494	97.2646	-0.10586
2.43767	39.0662	12.0805	-1.31603	97.2551	-0.105948
2.446	39.1566	12.0793	-1.31715	97.2455	-0.106038
2.45433	39.2464	12.0781	-1.31824	97.236	-0.106126
2.46267	39.3407	12.0769	-1.31934	97.2262	-0.106215
2.471	39.4306	12.0757	-1.32044	97.2163	-0.106303
2.47933	39.5166	12.0745	-1.32154	97.2068	-0.106392
2.48767	39.6014	12.0733	-1.32264	97.1974	-0.10648
2.496	39.6973	12.0721	-1.32373	97.1878	-0.106568
2.50433	39.7862	12.071	-1.32477	97.1784	-0.106652
2.51267	39.8778	12.0698	-1.32585	97.1688	-0.106739
2.521	39.9631	12.0686	-1.32694	97.1594	-0.106827
2.52933	40.0554	12.0674	-1.32803	97.1501	-0.106914
2.53767	40.1447	12.0663	-1.32913	97.1405	-0.107003
2.546	40.2352	12.0651	-1.33018	97.1313	-0.107088
2.55433	40.3231	12.064	-1.33126	97.122	-0.107174
2.56267	40.4124	12.0628	-1.3323	97.1124	-0.107258
2.571	40.5031	12.0616	-1.33333	97.1028	-0.107341
2.57933	40.5907	12.0603	-1.33437	97.093	-0.107424
2.58767	40.6769	12.0592	-1.33542	97.0833	-0.107509
2.596	40.765	12.0579	-1.3364	97.0736	-0.107588
2.60433	40.8534	12.0567	-1.33738	97.0638	-0.107667
2.61267	40.9434	12.0555	-1.33841	97.054	-0.10775
2.621	41.0398	12.0543	-1.33944	97.0445	-0.107833
2.62933	41.1242	12.0531	-1.34045	97.0346	-0.107914
2.63767	41.2129	12.0519	-1.34142	97.0251	-0.107992
2.646	41.2999	12.0507	-1.34242	97.0156	-0.108073
2.65433	41.3897	12.0495	-1.34341	97.0059	-0.108152
2.66267	41.4787	12.0484	-1.3444	96.9965	-0.108232
2.671	41.5703	12.0472	-1.3454	96.987	-0.108313
2.67933	41.6593	12.046	-1.34639	96.9775	-0.108392
2.68767	41.7463	12.0448	-1.34739	96.9681	-0.108473
2.696	41.8352	12.0437	-1.34831	96.9587	-0.108547
2.70433	41.9264	12.0425	-1.34918	96.9492	-0.108617
2.71267	42.0132	12.0413	-1.3501	96.94	-0.108691
2.721	42.1023	12.0401	-1.35103	96.9303	-0.108766
2.72933	42.1894	12.0389	-1.35191	96.9206	-0.108837
2.73767	42.271	12.0378	-1.35281	96.9112	-0.10891
2.746	42.368	12.0366	-1.3537	96.9016	-0.108981
2.75433	42.4496	12.0354	-1.35458	96.8921	-0.109052
2.76267	42.5407	12.0342	-1.3555	96.8825	-0.109126
2.771	42.6266	12.033	-1.35637	96.8729	-0.109196
2.77933	42.7173	12.0318	-1.35727	96.8635	-0.109268
2.78767	42.8038	12.0306	-1.35818	96.8538	-0.109342
2.796	42.8912	12.0294	-1.35906	96.8442	-0.109412
2.80433	42.9799	12.0283	-1.35991	96.8347	-0.109481
2.81267	43.0672	12.0271	-1.36073	96.8252	-0.109547
2.821	43.1584	12.0259	-1.36158	96.8153	-0.109615
2.82933	43.2451	12.0247	-1.3624	96.8058	-0.109682
2.83767	43.3278	12.0235	-1.3632	96.7961	-0.109746
2.846	43.4175	12.0223	-1.36399	96.7866	-0.109809
2.85433	43.504	12.0211	-1.36476	96.777	-0.109872
2.86267	43.5959	12.0199	-1.3655	96.7674	-0.109931
2.871	43.6786	12.0187	-1.36624	96.758	-0.10999
2.87933	43.7681	12.0176	-1.367	96.7488	-0.110051
2.88767	43.8515	12.0164	-1.36779	96.7392	-0.110115
2.896	43.9371	12.0152	-1.36858	96.7297	-0.110178
2.90433	44.0272	12.0141	-1.3693	96.7205	-0.110237
2.91267	44.1113	12.0129	-1.37003	96.7112	-0.110295
2.921	44.2044	12.0118	-1.37074	96.7019	-0.110353
2.92933	44.2883	12.0106	-1.37144	96.6924	-0.110409
2.93767	44.3761	12.0094	-1.37212	96.6832	-0.110464
2.946	44.4639	12.0083	-1.37281	96.6738	-0.110519
2.95433	44.5473	12.0071	-1.3735	96.6644	-0.110575
2.96267	44.6368	12.0059	-1.37415	96.655	-0.110628
2.971	44.7272	12.0048	-1.37474	96.6457	-0.110675
2.97933	44.8095	12.0037	-1.37534	96.6365	-0.110723
2.98767	44.893	12.0025	-1.37597	96.6271	-0.110774
2.996	44.9892	12.0013	-1.37658	96.6177	-0.110823
3.00433	45.0702	12.0002	-1.37718	96.6084	-0.110871
3.01267	45.1564	11.999	-1.37778	96.5989	-0.11092
3.021	45.2422	11.9978	-1.3784	96.5891	-0.110969
3.02933	45.325	11.9966	-1.37899	96.5799	-0.111017
3.03767	45.4108	11.9955	-1.37954	96.5707	-0.111061
3.046	45.4992	11.9943	-1.38009	96.5614	-0.111105
3.05433	45.5844	11.9932	-1.38065	96.5523	-0.11115
3.06267	45.6669	11.992	-1.3812	96.543	-0.111195
3.071	45.7529	11.9909	-1.38173	96.5339	-0.111238
3.07933	45.8423	11.9898	-1.38224	96.5247	-0.111279
3.08767	45.9259	11.9886	-1.38275	96.5155	-0.11132
3.096	46.0105	11.9875	-1.38327	96.5067	-0.111361
3.10433	46.0971	11.9864	-1.38373	96.4977	-0.111398
3.11267	46.181	11.9853	-1.38419	96.4884	-0.111435
3.121	46.2734	11.9841	-1.38467	96.4793	-0.111474
3.12933	46.3562	11.983	-1.38514	96.4702	-0.111512
3.13767	46.4434	11.9818	-1.38559	96.461	-0.111548
3.146	46.5241	11.9807	-1.38603	96.4519	-0.111584
3.15433	46.6098	11.9796	-1.38646	96.4429	-0.111618
3.16267	46.6906	11.9785	-1.38688	96.4337	-0.111652
3.171	46.7798	11.9773	-1.38731	96.4246	-0.111687
3.17933	46.8654	11.9762	-1.38771	96.4153	-0.111719
3.18767	46.9461	11.9751	-1.38809	96.4064	-0.11175
3.196	47.0301	11.974	-1.38847	96.3974	-0.11178
3.20433	47.1126	11.9728	-1.38886	96.3885	-0.111812
3.21267	47.197	11.9717	-1.38923	96.3793	-0.111841
3.221	47.2793	11.9706	-1.38961	96.3701	-0.111872
3.22933	47.3663	11.9694	-1.38998	96.361	-0.111902
3.23767	47.4474	11.9683	-1.3903	96.352	-0.111928
3.246	47.5356	11.9672	-1.39062	96.3429	-0.111954
3.25433	47.616	11.9661	-1.39087	96.334	-0.111973
3.26267	47.7006	11.965	-1.39115	96.3252	-0.111995
3.271	47.7836	11.9639	-1.39145	96.3162	-0.11202
3.27933	47.8729	11.9627	-1.39175	96.3073	-0.112044
3.28767	47.9548	11.9616	-1.39198	96.2983	-0.112062
3.296	48.0361	11.9605	-1.39222	96.2896	-0.112082
3.30433	48.1183	11.9595	-1.39245	96.2808	-0.112101
3.31267	48.2031	11.9584	-1.39268	96.2721	-0.112119
3.321	48.2828	11.9573	-1.39293	96.2632	-0.112139
3.32933	48.3699	11.9562	-1.39314	96.2545	-0.112156
3.33767	48.4543	11.9551	-1.39338	96.2457	-0.112176
3.346	48.5368	11.954	-1.39357	96.2367	-0.112191
3.35433	48.6161	11.9529	-1.39376	96.2281	-0.112206
3.36267	48.7046	11.9518	-1.39391	96.2194	-0.112218
3.371	48.7839	11.9507	-1.39409	96.2107	-0.112232
3.37933	48.8706	11.9497	-1.39427	96.202	-0.112247
3.38767	48.9494	11.9486	-1.39441	96.1934	-0.112258
3.396	49.0287	11.9475	-1.39452	96.1847	-0.112267
3.40433	49.1155	11.9465	-1.39466	96.1763	-0.112278
3.41267	49.1969	11.9454	-1.39481	96.1676	-0.112291
3.421	49.2831	11.9443	-1.39492	96.1591	-0.112299
3.42933	49.3631	11.9433	-1.39501	96.1504	-0.112307
3.43767	49.4422	11.9422	-1.39511	96.1417	-0.112314
3.446	49.5254	11.9411	-1.39522	96.1329	-0.112324
3.45433	49.6144	11.94	-1.3953	96.1242	-0.11233
3.46267	49.6963	11.9389	-1.39532	96.1154	-0.112332
3.471	49.7739	11.9378	-1.39532	96.1066	-0.112332
3.47933	49.858	11.9367	-1.39535	96.0978	-0.112334
3.48767	49.9378	11.9357	-1.39535	96.0891	-0.112334
3.496	50.022	11.9346	-1.39533	96.0806	-0.112333
3.50433	50.0972	11.9335	-1.3953	96.0721	-0.11233
3.51267	50.1842	11.9325	-1.39529	96.0637	-0.112329
3.521	50.2668	11.9315	-1.39526	96.0554	-0.112327
3.52933	50.3476	11.9304	-1.39521	96.0471	-0.112323
3.53767	50.4292	11.9294	-1.39515	96.0386	-0.112318
3.546	50.5072	11.9283	-1.3951	96.0303	-0.112314
3.55433	50.5913	11.9273	-1.39506	96.022	-0.112311
3.56267	50.6658	11.9263	-1.39499	96.0135	-0.112305
3.571	50.754	11.9252	-1.39493	96.005	-0.1123
3.57933	50.8351	11.9241	-1.39488	95.9964	-0.112296
3.58767	50.9147	11.9231	-1.39483	95.9879	-0.112292
3.596	50.999	11.922	-1.39475	95.9793	-0.112286
3.60433	51.0785	11.921	-1.39462	95.9708	-0.112275
3.61267	51.1554	11.9199	-1.39456	95.9625	-0.11227
3.621	51.2357	11.9189	-1.39449	95.9543	-0.112265
3.62933	51.3211	11.9179	-1.39439	95.9459	-0.112256
3.63767	51.4031	11.9168	-1.39429	95.9375	-0.112249
3.646	51.4878	11.9158	-1.39419	95.9295	-0.11224
3.65433	51.5653	11.9148	-1.39404	95.9212	-0.112228
3.66267	51.6458	11.9138	-1.39387	95.9134	-0.112215
3.671	51.7267	11.9128	-1.39369	95.9052	-0.112201
3.67933	51.8104	11.9118	-1.39355	95.8971	-0.112189
3.68767	51.8897	11.9108	-1.39346	95.889	-0.112182
3.696	51.9661	11.9098	-1.39331	95.8806	-0.112169
3.70433	52.0536	11.9087	-1.39312	95.8725	-0.112154
3.71267	52.1312	11.9077	-1.39292	95.8643	-0.112138
3.721	52.2107	11.9067	-1.3927	95.8562	-0.11212
3.72933	52.292	11.9057	-1.3925	95.8481	-0.112105
3.73767	52.3754	11.9047	-1.3923	95.8401	-0.112088
3.746	52.4554	11.9037	-1.39208	95.8317	-0.112071
3.75433	52.5317	11.9027	-1.39192	95.8238	-0.112058
3.76267	52.6116	11.9017	-1.39174	95.8157	-0.112043
3.771	52.6956	11.9007	-1.3915	95.8077	-0.112024
3.77933	52.7771	11.8997	-1.39124	95.7997	-0.112003
3.78767	52.858	11.8987	-1.39103	95.7916	-0.111986
3.796	52.9375	11.8977	-1.39085	95.7833	-0.111972
3.80433	53.019	11.8967	-1.39066	95.7754	-0.111956
3.81267	53.0989	11.8957	-1.39042	95.7676	-0.111937
3.821	53.178	11.8948	-1.39017	95.7598	-0.111917
3.82933	53.2602	11.8938	-1.38995	95.752	-0.111899
3.83767	53.3373	11.8927	-1.38971	95.7437	-0.11188
3.846	53.4177	11.8918	-1.38941	95.7358	-0.111856
3.85433	53.4972	11.8908	-1.38912	95.7276	-0.111832
3.86267	53.5783	11.8898	-1.38886	95.7197	-0.111812
3.871	53.659	11.8888	-1.38856	95.7117	-0.111788
3.87933	53.7374	11.8878	-1.38825	95.7038	-0.111763
3.88767	53.817	11.8868	-1.38797	95.696	-0.11174
3.896	53.8973	11.8858	-1.38769	95.6877	-0.111717
3.90433	53.9785	11.8848	-1.38742	95.6795	-0.111696
3.91267	54.0596	11.8838	-1.3871	95.6714	-0.11167
3.921	54.1382	11.8828	-1.38675	95.6639	-0.111642
3.92933	54.2157	11.8819	-1.38647	95.6562	-0.111619
3.93767	54.2937	11.8809	-1.38614	95.6487	-0.111593
3.946	54.3794	11.88	-1.38581	95.6408	-0.111566
3.95433	54.4562	11.879	-1.38547	95.633	-0.111539
3.96267	54.5353	11.878	-1.38515	95.6251	-0.111513
3.971	54.6128	11.877	-1.38479	95.6171	-0.111484
3.97933	54.6968	11.8761	-1.38444	95.6095	-0.111456
3.98767	54.7741	11.8751	-1.38406	95.6018	-0.111425
3.996	54.8532	11.8742	-1.38369	95.5942	-0.111395
4.00433	54.9356	11.8732	-1.38335	95.5863	-0.111368
4.01267	55.0148	11.8722	-1.38296	95.5785	-0.111336
4.021	55.0949	11.8712	-1.3826	95.5706	-0.111307
4.02933	55.1827	11.8703	-1.38221	95.5629	-0.111276
4.03767	55.2583	11.8694	-1.38183	95.5555	-0.111245
4.046	55.3388	11.8684	-1.3814	95.548	-0.111211
4.05433	55.4168	11.8675	-1.38099	95.5406	-0.111178
4.06267	55.4957	11.8666	-1.38057	95.533	-0.111144
4.071	55.5771	11.8656	-1.38015	95.5253	-0.11111
4.07933	55.6542	11.8646	-1.37976	95.5174	-0.111079
4.08767	55.7317	11.8637	-1.3793	95.5099	-0.111042
4.096	55.8167	11.8628	-1.37888	95.5025	-0.111008
4.10433	55.8949	11.8618	-1.37846	95.4947	-0.110974
4.11267	55.9748	11.8609	-1.37803	95.4872	-0.11094
4.121	56.0544	11.8599	-1.37758	95.4793	-0.110904
4.12933	56.1297	11.859	-1.37719	95.4718	-0.110872
4.13767	56.2096	11.858	-1.37677	95.4642	-0.110838
4.146	56.2925	11.8571	-1.37632	95.4566	-0.110802
4.15433	56.3748	11.8562	-1.3759	95.4492	-0.110768
4.16267	56.4545	11.8552	-1.37543	95.4416	-0.11073
4.171	56.5283	11.8543	-1.37498	95.4338	-0.110694
4.17933	56.6053	11.8533	-1.37451	95.4261	-0.110656
4.18767	56.6877	11.8524	-1.37407	95.4187	-0.110621
4.196	56.7689	11.8514	-1.3736	95.4112	-0.110583
4.20433	56.8422	11.8505	-1.37314	95.4038	-0.110546
4.21267	56.9274	11.8496	-1.37264	95.3962	-0.110506
4.221	57.0083	11.8486	-1.37214	95.3887	-0.110465
4.22933	57.094	11.8477	-1.37167	95.3811	-0.110428
4.23767	57.1672	11.8468	-1.37119	95.3735	-0.110389
4.246	57.2458	11.8458	-1.37075	95.3661	-0.110354
4.25433	57.328	11.8449	-1.37031	95.3587	-0.110318
4.26267	57.4061	11.844	-1.36988	95.3512	-0.110284
4.271	57.4858	11.843	-1.36937	95.3436	-0.110243
4.27933	57.5639	11.8421	-1.3689	95.3361	-0.110205
4.28767	57.6402	11.8412	-1.36844	95.3288	-0.110168
4.296	57.7233	11.8403	-1.36798	95.3214	-0.11013
4.30433	57.7979	11.8394	-1.36751	95.3139	-0.110093
4.31267	57.8795	11.8385	-1.36703	95.3068	-0.110054
4.321	57.962	11.8376	-1.36657	95.2997	-0.110017
4.32933	58.0391	11.8367	-1.36604	95.2923	-0.109974
4.33767	58.1212	11.8358	-1.36556	95.2851	-0.109936
4.346	58.2018	11.8349	-1.36506	95.2778	-0.109895
4.35433	58.2849	11.834	-1.36455	95.2708	-0.109854
4.36267	58.3572	11.8331	-1.36402	95.2636	-0.109812
4.371	58.4423	11.8322	-1.3635	95.2563	-0.10977
4.37933	58.5201	11.8313	-1.36301	95.2493	-0.10973
4.38767	58.5968	11.8304	-1.3625	95.2419	-0.109689
4.396	58.6787	11.8295	-1.362	95.2344	-0.109649
4.40433	58.7593	11.8286	-1.36143	95.2271	-0.109603
4.41267	58.8376	11.8277	-1.36094	95.22	-0.109563
4.421	58.9133	11.8268	-1.3604	95.2127	-0.10952
4.42933	58.9954	11.8259	-1.35986	95.2054	-0.109477
4.43767	59.077	11.825	-1.35937	95.1981	-0.109437
4.446	59.156	11.824	-1.35888	95.1906	-0.109398
4.45433	59.2386	11.8231	-1.35839	95.1833	-0.109359
4.46267	59.3128	11.8222	-1.35787	95.176	-0.109316
4.471	59.3941	11.8214	-1.35738	95.1689	-0.109277
4.47933	59.4717	11.8205	-1.35685	95.1621	-0.109235
4.48767	59.5504	11.8196	-1.35639	95.1552	-0.109197
4.496	59.6317	11.8188	-1.3559	95.1481	-0.109158
4.50433	59.7137	11.8179	-1.35541	95.1413	-0.109119
4.51267	59.7918	11.817	-1.35496	95.1342	-0.109082
4.521	59.8725	11.8162	-1.35447	95.1274	-0.109043
4.52933	59.951	11.8153	-1.35399	95.1205	-0.109004
4.53767	60.0294	11.8145	-1.35354	95.1138	-0.108968
4.546	60.1048	11.8136	-1.35313	95.1068	-0.108935
4.55433	60.19	11.8128	-1.35271	95.0998	-0.108901
4.56267	60.264	11.8119	-1.35227	95.0926	-0.108866
4.571	60.3472	11.811	-1.35184	95.0856	-0.108831
4.57933	60.4225	11.8101	-1.35144	95.0785	-0.108799
4.58767	60.505	11.8092	-1.351	95.0713	-0.108764
4.596	60.5864	11.8083	-1.35052	95.0642	-0.108725
4.60433	60.6681	11.8074	-1.35008	95.0567	-0.10869
4.61267	60.744	11.8065	-1.34962	95.0494	-0.108653
4.621	60.8261	11.8056	-1.34915	95.0422	-0.108614
4.62933	60.906	11.8047	-1.34868	95.0352	-0.108576
4.63767	60.9845	11.8039	-1.34821	95.0281	-0.108539
4.646	61.0618	11.803	-1.34778	95.0209	-0.108504
4.65433	61.1469	11.8021	-1.34733	95.0138	-0.108468
4.66267	61.2292	11.8012	-1.34683	95.0068	-0.108428
4.671	61.3119	11.8003	-1.34641	94.9995	-0.108394
4.67933	61.3847	11.7994	-1.34606	94.9925	-0.108366
4.68767	61.4672	11.7986	-1.34569	94.9857	-0.108336
4.696	61.545	11.7978	-1.34533	94.9789	-0.108307
4.70433	61.6225	11.7968	-1.34498	94.9717	-0.108279
4.71267	61.7027	11.7959	-1.34462	94.9642	-0.10825
4.721	61.7855	11.795	-1.34425	94.957	-0.10822
4.72933	61.8654	11.7941	-1.3439	94.9499	-0.108192
4.73767	61.943	11.7932	-1.34355	94.9426	-0.108163
4.746	62.0262	11.7923	-1.34323	94.9354	-0.108138
4.75433	62.1065	11.7915	-1.34288	94.9283	-0.10811
4.76267	62.1861	11.7906	-1.34252	94.921	-0.108081
4.771	62.2668	11.7896	-1.34219	94.9136	-0.108054
4.77933	62.3408	11.7887	-1.34187	94.9062	-0.108029
4.78767	62.4308	11.7879	-1.34153	94.8993	-0.108001
4.796	62.504	11.787	-1.3412	94.8925	-0.107975
4.80433	62.5793	11.7862	-1.34092	94.8856	-0.107952
4.81267	62.6621	11.7853	-1.34065	94.8786	-0.10793
4.821	62.7436	11.7844	-1.34038	94.8714	-0.107909
4.82933	62.8176	11.7835	-1.34011	94.8644	-0.107887
4.83767	62.9046	11.7826	-1.33988	94.8573	-0.107868
4.846	62.9833	11.7818	-1.33963	94.8502	-0.107848
4.85433	63.0644	11.7809	-1.33942	94.8432	-0.107831
4.86267	63.1436	11.78	-1.33925	94.836	-0.107818
4.871	63.2268	11.7791	-1.33912	94.8286	-0.107807
4.87933	63.3015	11.7782	-1.33899	94.8211	-0.107797
4.88767	63.3833	11.7772	-1.33887	94.8135	-0.107787
4.896	63.4645	11.7763	-1.33876	94.8061	-0.107778
4.90433	63.5431	11.7753	-1.33867	94.7983	-0.107771
4.91267	63.6187	11.7744	-1.33859	94.791	-0.107765
4.921	63.7009	11.7735	-1.33849	94.7836	-0.107756
4.92933	63.7833	11.7726	-1.33845	94.7762	-0.107753
4.93767	63.8646	11.7716	-1.33841	94.7687	-0.10775
4.946	63.9415	11.7707	-1.33842	94.7614	-0.107751
4.95433	64.0225	11.7698	-1.33838	94.7539	-0.107747
4.96267	64.1052	11.7689	-1.33839	94.7464	-0.107748
4.971	64.1841	11.768	-1.33837	94.7391	-0.107747
4.97933	64.2659	11.767	-1.33835	94.7314	-0.107745
4.98767	64.3422	11.7661	-1.3384	94.724	-0.107749
4.996	64.4185	11.7652	-1.33845	94.7166	-0.107753
5.00433	64.5048	11.7642	-1.33852	94.7091	-0.107759
5.01267	64.5864	11.7633	-1.3386	94.7017	-0.107765
5.021	64.6629	11.7624	-1.33869	94.6941	-0.107772
5.02933	64.7466	11.7614	-1.33876	94.6864	-0.107778
5.03767	64.8283	11.7605	-1.33888	94.679	-0.107788
5.046	64.905	11.7595	-1.33902	94.6712	-0.107799
5.05433	64.9849	11.7586	-1.33917	94.6636	-0.107811
5.06267	65.0639	11.7576	-1.33937	94.6561	-0.107828
5.071	65.1467	11.7567	-1.33959	94.6484	-0.107845
5.07933	65.2301	11.7557	-1.33984	94.6405	-0.107865
5.08767	65.3079	11.7547	-1.34009	94.6326	-0.107886
5.096	65.3877	11.7537	-1.34038	94.6245	-0.107909
5.10433	65.4723	11.7527	-1.34066	94.6166	-0.107931
5.11267	65.549	11.7518	-1.341	94.6088	-0.107958
5.121	65.6226	11.7508	-1.34135	94.6009	-0.107987
5.12933	65.712	11.7498	-1.34169	94.5929	-0.108014
5.13767	65.7872	11.7488	-1.34207	94.585	-0.108045
5.146	65.8656	11.7478	-1.34248	94.577	-0.108078
5.15433	65.9481	11.7468	-1.3429	94.5691	-0.108111
5.16267	66.0301	11.7458	-1.34331	94.561	-0.108145
5.171	66.1058	11.7448	-1.34381	94.553	-0.108185
5.17933	66.1875	11.7439	-1.34429	94.545	-0.108223
5.18767	66.2684	11.7429	-1.34481	94.537	-0.108266
5.196	66.3462	11.7419	-1.34529	94.5291	-0.108304
5.20433	66.4283	11.7409	-1.34578	94.5209	-0.108344
5.21267	66.5118	11.7398	-1.34634	94.5127	-0.108388
5.221	66.5905	11.7388	-1.34692	94.5043	-0.108435
5.22933	66.6691	11.7378	-1.34753	94.496	-0.108484
5.23767	66.7507	11.7368	-1.34814	94.4878	-0.108534
5.246	66.8297	11.7357	-1.34875	94.4797	-0.108583
5.25433	66.915	11.7347	-1.34933	94.4717	-0.108629
5.26267	66.991	11.7337	-1.34993	94.4633	-0.108677
5.271	67.0695	11.7327	-1.35053	94.4551	-0.108726
5.27933	67.1549	11.7316	-1.35117	94.4464	-0.108777
5.28767	67.2323	11.7305	-1.35186	94.4378	-0.108833
5.296	67.3117	11.7295	-1.35257	94.4296	-0.10889
5.30433	67.3905	11.7285	-1.35324	94.4212	-0.108944
5.31267	67.4711	11.7274	-1.35394	94.413	-0.109
5.321	67.5518	11.7264	-1.35464	94.4046	-0.109057
5.32933	67.6273	11.7253	-1.35538	94.3959	-0.109116
5.33767	67.7154	11.7242	-1.35616	94.387	-0.109179
5.346	67.7957	11.7232	-1.35695	94.3784	-0.109243
5.35433	67.8721	11.7221	-1.35781	94.3698	-0.109312
5.36267	67.9556	11.721	-1.35863	94.3612	-0.109378
5.371	68.038	11.7199	-1.35942	94.3525	-0.109442
5.37933	68.1192	11.7189	-1.36024	94.3438	-0.109508
5.38767	68.1973	11.7178	-1.36109	94.335	-0.109576
5.396	68.2723	11.7167	-1.36195	94.3262	-0.109645
5.40433	68.3598	11.7156	-1.36284	94.3174	-0.109717
5.41267	68.4394	11.7145	-1.36375	94.3087	-0.10979
5.421	68.5144	11.7134	-1.36468	94.3001	-0.109865
5.42933	68.6018	11.7124	-1.36558	94.2915	-0.109937
5.43767	68.68	11.7113	-1.36648	94.2828	-0.11001
5.446	68.7607	11.7102	-1.3674	94.274	-0.110084
5.45433	68.8397	11.7091	-1.36837	94.2652	-0.110162
5.46267	68.9178	11.708	-1.36932	94.2565	-0.110239
5.471	68.9996	11.7069	-1.37031	94.2478	-0.110318
5.47933	69.0804	11.7058	-1.37132	94.2389	-0.110399
5.48767	69.16	11.7047	-1.37231	94.2301	-0.110479
5.496	69.2445	11.7036	-1.37329	94.2211	-0.110558
5.50433	69.323	11.7025	-1.37429	94.2121	-0.110638
5.51267	69.4061	11.7014	-1.37534	94.2031	-0.110723
5.521	69.4848	11.7002	-1.37637	94.1938	-0.110806
5.52933	69.5643	11.6991	-1.3774	94.1849	-0.110889
5.53767	69.6453	11.698	-1.37844	94.176	-0.110973
5.546	69.7245	11.6969	-1.37948	94.1669	-0.111056
5.55433	69.7996	11.6958	-1.38052	94.1578	-0.11114
5.56267	69.8873	11.6946	-1.38151	94.1486	-0.11122
5.571	69.9661	11.6935	-1.38256	94.1392	-0.111304
5.57933	70.0478	11.6923	-1.38363	94.1301	-0.11139
5.58767	70.1294	11.6912	-1.38464	94.121	-0.111472
5.596	70.2086	11.69	-1.3857	94.1117	-0.111557
5.60433	70.2935	11.6889	-1.38677	94.1026	-0.111643
5.61267	70.3732	11.6878	-1.38787	94.0934	-0.111732
5.621	70.4525	11.6866	-1.38896	94.0839	-0.111819
5.62933	70.5332	11.6854	-1.39003	94.0744	-0.111906
5.63767	70.6134	11.6843	-1.39108	94.0652	-0.11199
5.646	70.697	11.6831	-1.39217	94.0558	-0.112078
5.65433	70.7725	11.6819	-1.39326	94.0466	-0.112165
5.66267	70.8592	11.6808	-1.39433	94.0372	-0.112252
5.671	70.9383	11.6796	-1.39545	94.0278	-0.112342
5.67933	71.0153	11.6785	-1.39653	94.0186	-0.112429
5.68767	71.1007	11.6773	-1.3976	94.0095	-0.112515
5.696	71.1769	11.6762	-1.39865	94.0001	-0.1126
5.70433	71.2635	11.675	-1.39973	93.9909	-0.112687
5.71267	71.3469	11.6739	-1.40082	93.9817	-0.112774
5.721	71.4247	11.6727	-1.40193	93.9724	-0.112864
5.72933	71.5058	11.6716	-1.40305	93.9632	-0.112954
5.73767	71.5922	11.6704	-1.40414	93.9539	-0.113042
5.746	71.6672	11.6693	-1.40521	93.9446	-0.113128
5.75433	71.7498	11.6681	-1.4063	93.9352	-0.113216
5.76267	71.8311	11.6669	-1.40738	93.9257	-0.113302
5.771	71.9118	11.6657	-1.40846	93.9161	-0.11339
5.77933	71.9942	11.6646	-1.40957	93.9067	-0.113479
5.78767	72.0748	11.6634	-1.41069	93.8974	-0.113569
5.796	72.1578	11.6622	-1.41182	93.8879	-0.11366
5.80433	72.2416	11.6611	-1.41291	93.8785	-0.113748
5.81267	72.3249	11.6599	-1.41398	93.8691	-0.113834
5.821	72.4065	11.6587	-1.41507	93.8594	-0.113922
5.82933	72.4846	11.6575	-1.41618	93.8497	-0.114011
5.83767	72.5639	11.6563	-1.41724	93.8402	-0.114096
5.846	72.6453	11.6551	-1.41833	93.8308	-0.114184
5.85433	72.73	11.654	-1.4194	93.8213	-0.11427
5.86267	72.8086	11.6528	-1.4205	93.8119	-0.114359
5.871	72.8903	11.6516	-1.42157	93.8022	-0.114445
5.87933	72.9737	11.6504	-1.42263	93.7927	-0.11453
5.88767	73.0568	11.6492	-1.4237	93.7828	-0.114616
5.896	73.1374	11.648	-1.42478	93.7732	-0.114704
5.90433	73.2164	11.6468	-1.42585	93.7635	-0.11479
5.91267	73.3014	11.6456	-1.42695	93.7539	-0.114878
5.921	73.3804	11.6444	-1.42803	93.7442	-0.114965
5.92933	73.4632	11.6432	-1.42911	93.7344	-0.115052
5.93767	73.5401	11.642	-1.43022	93.7247	-0.115141
5.946	73.6271	11.6407	-1.43128	93.7147	-0.115227
5.95433	73.7063	11.6395	-1.43235	93.7049	-0.115313
5.96267	73.7903	11.6383	-1.43345	93.6954	-0.115401
5.971	73.8713	11.6371	-1.43456	93.6859	-0.115491
5.97933	73.9518	11.6359	-1.43563	93.6763	-0.115577
5.98767	74.0359	11.6348	-1.43666	93.6668	-0.11566
5.996	74.118	11.6336	-1.43769	93.6573	-0.115743
6.00433	74.2029	11.6324	-1.43878	93.6478	-0.11583
6.01267	74.2829	11.6312	-1.43984	93.6382	-0.115916
6.021	74.3654	11.63	-1.44087	93.6281	-0.115999
6.02933	74.4464	11.6288	-1.44188	93.6185	-0.11608
6.03767	74.5272	11.6276	-1.44288	93.6088	-0.116161
6.046	74.6069	11.6263	-1.4439	93.5988	-0.116243
6.05433	74.6957	11.6251	-1.44492	93.589	-0.116324
6.06267	74.7752	11.6239	-1.44596	93.579	-0.116409
6.071	74.8569	11.6226	-1.44703	93.5691	-0.116494
6.07933	74.9401	11.6214	-1.44809	93.5593	-0.11658
6.08767	75.0242	11.6202	-1.44911	93.5495	-0.116662
6.096	75.1072	11.619	-1.45015	93.5396	-0.116746
6.10433	75.1843	11.6178	-1.45116	93.5303	-0.116827
6.11267	75.2698	11.6166	-1.4522	93.5206	-0.116911
6.121	75.3491	11.6154	-1.45324	93.5108	-0.116995
6.12933	75.4326	11.6142	-1.45425	93.5012	-0.117075
6.13767	75.5148	11.613	-1.45522	93.4914	-0.117154
6.146	75.5965	11.6118	-1.45617	93.4816	-0.11723
6.15433	75.6787	11.6106	-1.45718	93.4719	-0.117311
6.16267	75.7636	11.6093	-1.45814	93.4621	-0.117389
6.171	75.8364	11.6081	-1.45913	93.4523	-0.117469
6.17933	75.9194	11.6069	-1.46012	93.4425	-0.117548
6.18767	76.0036	11.6057	-1.46108	93.4327	-0.117626
6.196	76.0831	11.6045	-1.46203	93.4229	-0.117702
6.20433	76.1742	11.6032	-1.46296	93.4131	-0.117777
6.21267	76.2537	11.602	-1.46392	93.4032	-0.117854
6.221	76.3411	11.6008	-1.46489	93.3934	-0.117932
6.22933	76.4167	11.5996	-1.46584	93.3838	-0.118009
6.23767	76.4985	11.5983	-1.46677	93.3736	-0.118083
6.246	76.5826	11.5971	-1.46771	93.3635	-0.11816
6.25433	76.6654	11.5958	-1.46864	93.3533	-0.118234
6.26267	76.7477	11.5946	-1.46951	93.3431	-0.118305
6.271	76.8247	11.5933	-1.47046	93.333	-0.118381
6.27933	76.9121	11.592	-1.4714	93.3228	-0.118457
6.28767	76.993	11.5908	-1.47233	93.3129	-0.118531
6.296	77.0777	11.5896	-1.47322	93.3029	-0.118603
6.30433	77.16	11.5883	-1.47411	93.293	-0.118675
6.31267	77.2401	11.5871	-1.47503	93.2829	-0.118749
6.321	77.3237	11.5859	-1.47594	93.2733	-0.118822
6.32933	77.4043	11.5847	-1.4768	93.2636	-0.118891
6.33767	77.4833	11.5835	-1.47767	93.254	-0.118961
6.346	77.5691	11.5823	-1.47853	93.2443	-0.11903
6.35433	77.6518	11.5811	-1.47935	93.2344	-0.119097
6.36267	77.7347	11.5799	-1.48021	93.2248	-0.119166
6.371	77.82	11.5786	-1.48103	93.215	-0.119232
6.37933	77.8957	11.5774	-1.48185	93.205	-0.119298
6.38767	77.9836	11.5762	-1.48263	93.195	-0.119361
6.396	78.061	11.5749	-1.48344	93.1851	-0.119426
6.40433	78.1452	11.5737	-1.48421	93.175	-0.119488
6.41267	78.2286	11.5724	-1.48504	93.1648	-0.119555
6.421	78.3126	11.5712	-1.48583	93.1547	-0.119618
6.42933	78.3961	11.5699	-1.48666	93.1448	-0.119685
6.43767	78.4792	11.5687	-1.48744	93.1351	-0.119748
6.446	78.5587	11.5675	-1.48818	93.1252	-0.119807
6.45433	78.6415	11.5663	-1.48896	93.1154	-0.11987
6.46267	78.7229	11.565	-1.48973	93.1055	-0.119932
6.471	78.8079	11.5638	-1.49049	93.0955	-0.119993
6.47933	78.8907	11.5626	-1.49122	93.0856	-0.120052
6.48767	78.9734	11.5614	-1.49193	93.0758	-0.120109
6.496	79.0577	11.5602	-1.4926	93.0662	-0.120164
6.50433	79.1429	11.5589	-1.4933	93.0564	-0.12022
6.51267	79.2254	11.5577	-1.49394	93.0465	-0.120271
6.521	79.3058	11.5565	-1.49459	93.0367	-0.120324
6.52933	79.3874	11.5553	-1.49525	93.0267	-0.120376
6.53767	79.4685	11.554	-1.49588	93.0168	-0.120427
6.546	79.5521	11.5528	-1.49647	93.007	-0.120475
6.55433	79.635	11.5516	-1.49707	92.9973	-0.120523
6.56267	79.7221	11.5504	-1.49766	92.9874	-0.120571
6.571	79.804	11.5492	-1.49826	92.9776	-0.120619
6.57933	79.8834	11.548	-1.49884	92.9679	-0.120666
6.58767	79.9672	11.5467	-1.49943	92.958	-0.120713
6.596	80.0545	11.5455	-1.50004	92.9482	-0.120762
6.60433	80.1346	11.5443	-1.50063	92.9384	-0.12081
6.61267	80.2193	11.5431	-1.50119	92.9289	-0.120855
6.621	80.3035	11.5419	-1.50173	92.9193	-0.120898
6.62933	80.3841	11.5407	-1.50227	92.9095	-0.120942
6.63767	80.4663	11.5395	-1.50282	92.8999	-0.120986
6.646	80.5491	11.5383	-1.50336	92.8901	-0.12103
6.65433	80.6339	11.5371	-1.50387	92.8803	-0.121071
6.66267	80.7131	11.5359	-1.50435	92.8707	-0.121109
6.671	80.7998	11.5347	-1.50478	92.8611	-0.121143
6.67933	80.8801	11.5335	-1.50517	92.8517	-0.121175
6.68767	80.9639	11.5323	-1.50558	92.8421	-0.121208
6.696	81.0452	11.5311	-1.50599	92.8323	-0.121241
6.70433	81.1256	11.5299	-1.50635	92.8226	-0.12127
6.71267	81.2108	11.5287	-1.50673	92.8132	-0.121301
6.721	81.2939	11.5275	-1.50709	92.8036	-0.12133
6.72933	81.3803	11.5264	-1.50742	92.7941	-0.121356
6.73767	81.4611	11.5252	-1.50772	92.7847	-0.121381
6.746	81.5481	11.524	-1.50802	92.7752	-0.121405
6.75433	81.6284	11.5228	-1.50832	92.7656	-0.121429
6.76267	81.7113	11.5216	-1.50861	92.7562	-0.121452
6.771	81.7955	11.5205	-1.50885	92.7467	-0.121471
6.77933	81.876	11.5193	-1.50904	92.7373	-0.121487
6.78767	81.9644	11.5181	-1.5093	92.7279	-0.121508
6.796	82.0497	11.517	-1.5095	92.7184	-0.121523
6.80433	82.1315	11.5158	-1.50968	92.7091	-0.121538
6.81267	82.2133	11.5146	-1.50981	92.6998	-0.121549
6.821	82.2954	11.5135	-1.50996	92.6905	-0.12156
6.82933	82.3782	11.5123	-1.51009	92.681	-0.121572
6.83767	82.46	11.5112	-1.51021	92.6717	-0.121581
6.846	82.5417	11.51	-1.51031	92.6624	-0.121589
6.85433	82.6281	11.5089	-1.51042	92.6533	-0.121598
6.86267	82.7109	11.5077	-1.5105	92.6438	-0.121604
6.871	82.7932	11.5066	-1.51054	92.6348	-0.121607
6.87933	82.8726	11.5054	-1.51057	92.6257	-0.12161
6.88767	82.9574	11.5043	-1.51056	92.6165	-0.121609
6.896	83.0411	11.5032	-1.51054	92.6073	-0.121608
6.90433	83.1252	11.502	-1.51048	92.5982	-0.121602
6.91267	83.2098	11.5009	-1.51039	92.5894	-0.121595
6.921	83.2931	11.4998	-1.51028	92.5805	-0.121587
6.92933	83.3703	11.4987	-1.51015	92.5715	-0.121576
6.93767	83.4568	11.4976	-1.50999	92.5624	-0.121563
6.946	83.545	11.4965	-1.50983	92.5535	-0.12155
6.95433	83.6251	11.4954	-1.50962	92.5446	-0.121534
6.96267	83.7159	11.4943	-1.50941	92.5358	-0.121516
6.971	83.7959	11.4932	-1.50915	92.527	-0.121496
6.97933	83.8795	11.4921	-1.50889	92.5181	-0.121474
6.98767	83.9663	11.491	-1.50862	92.5094	-0.121453
6.996	84.0487	11.4899	-1.50829	92.5006	-0.121427
7.00433	84.1334	11.4889	-1.50795	92.4923	-0.121399
7.01267	84.2198	11.4878	-1.50755	92.4837	-0.121367
7.021	84.3013	11.4868	-1.50714	92.4752	-0.121334
7.02933	84.3859	11.4857	-1.50676	92.4667	-0.121303
7.03767	84.4657	11.4847	-1.50637	92.4584	-0.121272
7.046	84.5451	11.4836	-1.50595	92.45	-0.121238
7.05433	84.6316	11.4826	-1.50549	92.4419	-0.121201
7.06267	84.7164	11.4816	-1.50499	92.4335	-0.12116
7.071	84.7995	11.4805	-1.50448	92.425	-0.121119
7.07933	84.8871	11.4795	-1.50397	92.4167	-0.121079
7.08767	84.9691	11.4784	-1.50345	92.408	-0.121037
7.096	85.0556	11.4773	-1.50291	92.3995	-0.120993
7.10433	85.1364	11.4763	-1.50236	92.3912	-0.120949
7.11267	85.2208	11.4753	-1.50177	92.3831	-0.120901
7.121	85.3031	11.4743	-1.50112	92.3747	-0.120849
7.12933	85.3894	11.4732	-1.50041	92.3664	-0.120792
7.13767	85.4742	11.4722	-1.49973	92.3581	-0.120737
7.146	85.5546	11.4712	-1.49908	92.3499	-0.120685
7.15433	85.6373	11.4702	-1.49839	92.342	-0.120629
7.16267	85.7236	11.4692	-1.4977	92.3339	-0.120574
7.171	85.8092	11.4682	-1.49698	92.326	-0.120516
7.17933	85.8901	11.4672	-1.49624	92.318	-0.120456
7.18767	85.9814	11.4662	-1.49547	92.3097	-0.120394
7.196	86.0613	11.4652	-1.49469	92.3014	-0.120331
7.20433	86.1443	11.4641	-1.49385	92.2932	-0.120264
7.21267	86.2292	11.4632	-1.49308	92.2852	-0.120202
7.221	86.3143	11.4622	-1.4923	92.2774	-0.120139
7.22933	86.4032	11.4612	-1.49142	92.2693	-0.120068
7.23767	86.4844	11.4602	-1.49057	92.2611	-0.12
7.246	86.5706	11.4592	-1.48969	92.2531	-0.119929
7.25433	86.652	11.4582	-1.4888	92.2452	-0.119857
7.26267	86.7368	11.4572	-1.48791	92.2375	-0.119786
7.271	86.8223	11.4563	-1.48697	92.23	-0.11971
7.27933	86.905	11.4553	-1.48603	92.2224	-0.119635
7.28767	86.9853	11.4544	-1.4851	92.2148	-0.11956
7.296	87.0729	11.4535	-1.48415	92.2072	-0.119483
7.30433	87.1566	11.4525	-1.48315	92.1994	-0.119402
7.31267	87.2382	11.4516	-1.48218	92.1919	-0.119324
7.321	87.3259	11.4507	-1.48117	92.1847	-0.119243
7.32933	87.4134	11.4497	-1.48014	92.1772	-0.11916
7.33767	87.492	11.4488	-1.4791	92.1695	-0.119076
7.346	87.5779	11.4478	-1.47804	92.1617	-0.118991
7.35433	87.658	11.4469	-1.477	92.1542	-0.118907
7.36267	87.7463	11.4459	-1.47595	92.1466	-0.118822
7.371	87.8315	11.445	-1.47492	92.1394	-0.11874
7.37933	87.918	11.4441	-1.47382	92.1317	-0.118651
7.38767	87.9971	11.4432	-1.47273	92.1244	-0.118564
7.396	88.0829	11.4423	-1.47164	92.1172	-0.118476
7.40433	88.1679	11.4414	-1.47051	92.1098	-0.118385
7.41267	88.2572	11.4404	-1.46938	92.1024	-0.118294
7.421	88.335	11.4396	-1.46824	92.0952	-0.118202
7.42933	88.4185	11.4387	-1.46707	92.088	-0.118108
7.43767	88.506	11.4378	-1.46593	92.0808	-0.118017
7.446	88.5888	11.4369	-1.46474	92.0736	-0.11792
7.45433	88.6753	11.436	-1.46351	92.0665	-0.117821
7.46267	88.7559	11.4351	-1.4623	92.0596	-0.117724
7.471	88.8448	11.4342	-1.46107	92.0524	-0.117625
7.47933	88.9282	11.4333	-1.45984	92.0451	-0.117526
7.48767	89.0134	11.4324	-1.45862	92.0378	-0.117427
7.496	89.0984	11.4315	-1.45738	92.0307	-0.117328
7.50433	89.1811	11.4307	-1.45614	92.0238	-0.117228
7.51267	89.2677	11.4298	-1.45491	92.017	-0.117129
7.521	89.3562	11.429	-1.45364	92.0099	-0.117027
7.52933	89.4359	11.4281	-1.45237	92.0028	-0.116924
7.53767	89.5208	11.4272	-1.45109	91.9956	-0.116822
7.546	89.605	11.4263	-1.44979	91.9885	-0.116717
7.55433	89.6886	11.4254	-1.44852	91.9816	-0.116614
7.56267	89.7765	11.4246	-1.44722	91.9747	-0.11651
7.571	89.8623	11.4237	-1.44591	91.9679	-0.116405
7.57933	89.945	11.4229	-1.4446	91.9612	-0.116299
7.58767	90.0252	11.422	-1.4433	91.9542	-0.116194
7.596	90.1125	11.4212	-1.44198	91.9474	-0.116088
7.60433	90.1968	11.4204	-1.44066	91.9407	-0.115982
7.61267	90.2792	11.4195	-1.43935	91.9339	-0.115876
7.621	90.3613	11.4187	-1.43803	91.9272	-0.11577
7.62933	90.4479	11.4179	-1.43669	91.9206	-0.115662
7.63767	90.534	11.417	-1.43536	91.9141	-0.115555
7.646	90.6177	11.4162	-1.43399	91.9075	-0.115445
7.65433	90.7035	11.4154	-1.43261	91.9007	-0.115334
7.66267	90.7851	11.4146	-1.43125	91.8942	-0.115224
7.671	90.8735	11.4138	-1.42988	91.8876	-0.115114
7.67933	90.9555	11.4129	-1.42849	91.8808	-0.115002
7.68767	91.0399	11.4121	-1.42711	91.8742	-0.114891
7.696	91.1262	11.4113	-1.42573	91.8676	-0.114779
7.70433	91.2105	11.4105	-1.42435	91.8612	-0.114669
7.71267	91.2914	11.4097	-1.42302	91.8546	-0.114562
7.721	91.374	11.4088	-1.42166	91.848	-0.114452
7.72933	91.4614	11.408	-1.4203	91.8414	-0.114343
7.73767	91.5474	11.4072	-1.41896	91.8349	-0.114235
7.746	91.6346	11.4064	-1.41759	91.8283	-0.114124
7.75433	91.7146	11.4056	-1.41621	91.8217	-0.114013
7.76267	91.7963	11.4048	-1.41483	91.8154	-0.113902
7.771	91.8867	11.404	-1.41342	91.809	-0.113789
7.77933	91.9702	11.4032	-1.41207	91.8026	-0.11368
7.78767	92.0517	11.4024	-1.41069	91.7962	-0.113569
7.796	92.1387	11.4016	-1.40933	91.7898	-0.113459
7.80433	92.2203	11.4009	-1.40794	91.7836	-0.113348
7.81267	92.3067	11.4001	-1.4066	91.7773	-0.11324
7.821	92.3888	11.3993	-1.40525	91.771	-0.113131
7.82933	92.474	11.3985	-1.40387	91.765	-0.11302
7.83767	92.5583	11.3978	-1.40251	91.7587	-0.11291
7.846	92.6428	11.3969	-1.4012	91.7522	-0.112805
7.85433	92.7289	11.3961	-1.39987	91.7456	-0.112698
7.86267	92.8147	11.3953	-1.39849	91.7393	-0.112587
7.871	92.8988	11.3946	-1.39711	91.7329	-0.112475
7.87933	92.9831	11.3937	-1.39569	91.7264	-0.112361
7.88767	93.0708	11.3929	-1.39429	91.7197	-0.112249
7.896	93.151	11.3921	-1.39286	91.7133	-0.112133
7.90433	93.2351	11.3913	-1.39145	91.7068	-0.11202
7.91267	93.3178	11.3905	-1.39008	91.7003	-0.11191
7.921	93.4025	11.3897	-1.38871	91.6942	-0.111799
7.92933	93.4859	11.389	-1.38731	91.6881	-0.111686
7.93767	93.5722	11.3882	-1.38593	91.6819	-0.111576
7.946	93.6557	11.3874	-1.38454	91.6757	-0.111463
7.95433	93.7419	11.3867	-1.38317	91.6696	-0.111353
7.96267	93.8241	11.3859	-1.38186	91.6634	-0.111248
7.971	93.9068	11.3852	-1.38054	91.6575	-0.111142
7.97933	93.9921	11.3844	-1.37922	91.6514	-0.111036
7.98767	94.0779	11.3837	-1.37788	91.6453	-0.110928
7.996	94.1648	11.3829	-1.37658	91.639	-0.110823
8.00433	94.2438	11.3821	-1.37523	91.6328	-0.110714
8.01267	94.33	11.3813	-1.3739	91.6267	-0.110607
8.021	94.4148	11.3806	-1.37257	91.6205	-0.1105
8.02933	94.498	11.3798	-1.37129	91.6145	-0.110397
8.03767	94.5854	11.3791	-1.36998	91.6085	-0.110291
8.046	94.6703	11.3784	-1.36866	91.6027	-0.110186
8.05433	94.7526	11.3776	-1.36736	91.5965	-0.11008
8.06267	94.8385	11.3769	-1.36604	91.5906	-0.109974
8.071	94.9194	11.3762	-1.36476	91.5849	-0.109871
8.07933	95.0075	11.3754	-1.36343	91.579	-0.109764
8.08767	95.0891	11.3747	-1.36216	91.5729	-0.109662
8.096	95.1748	11.3739	-1.36086	91.5668	-0.109558
8.10433	95.255	11.3732	-1.35957	91.561	-0.109454
8.11267	95.3417	11.3724	-1.35828	91.5547	-0.10935
8.121	95.4241	11.3717	-1.35698	91.5486	-0.109245
8.12933	95.5066	11.3709	-1.35566	91.5424	-0.109139
8.13767	95.5973	11.3701	-1.35435	91.5362	-0.109033
8.146	95.6753	11.3694	-1.35307	91.5302	-0.10893
8.15433	95.7599	11.3686	-1.35177	91.524	-0.108826
8.16267	95.8418	11.3679	-1.35051	91.5181	-0.108724
8.171	95.9264	11.3671	-1.34924	91.5122	-0.108622
8.17933	96.0163	11.3664	-1.34798	91.5061	-0.108521
8.18767	96.0957	11.3656	-1.3467	91.4999	-0.108417
8.196	96.1813	11.3649	-1.34545	91.4941	-0.108317
8.20433	96.2661	11.3642	-1.34425	91.4883	-0.10822
8.21267	96.3484	11.3635	-1.343	91.4827	-0.10812
8.221	96.431	11.3628	-1.34174	91.4769	-0.108018
8.22933	96.517	11.362	-1.34049	91.471	-0.107918
8.23767	96.6041	11.3613	-1.33928	91.465	-0.10782
8.246	96.6871	11.3605	-1.33807	91.4591	-0.107722
8.25433	96.773	11.3598	-1.33683	91.4532	-0.107623
8.26267	96.8573	11.3591	-1.33559	91.4474	-0.107523
8.271	96.9443	11.3584	-1.33438	91.4417	-0.107425
8.27933	97.025	11.3576	-1.33317	91.4358	-0.107328
8.28767	97.1034	11.3569	-1.33193	91.43	-0.107228
8.296	97.1876	11.3562	-1.33075	91.4239	-0.107133
8.30433	97.2724	11.3554	-1.32956	91.4181	-0.107038
8.31267	97.3548	11.3547	-1.32836	91.4124	-0.106941
8.321	97.4413	11.354	-1.32716	91.4067	-0.106844
8.32933	97.5301	11.3533	-1.32596	91.4009	-0.106748
8.33767	97.6116	11.3526	-1.32474	91.3952	-0.106649
8.346	97.6977	11.3519	-1.32353	91.3896	-0.106552
8.35433	97.7776	11.3512	-1.32233	91.3842	-0.106455
8.36267	97.8581	11.3505	-1.32111	91.3784	-0.106357
8.371	97.9409	11.3498	-1.31991	91.3726	-0.10626
8.37933	98.0299	11.3491	-1.3187	91.3671	-0.106164
8.38767	98.1147	11.3484	-1.31755	91.3613	-0.106071
8.396	98.2003	11.3477	-1.31639	91.3554	-0.105977
8.40433	98.2809	11.3469	-1.31519	91.3496	-0.10588
8.41267	98.3663	11.3462	-1.31398	91.3438	-0.105783
8.421	98.4534	11.3455	-1.31283	91.3382	-0.10569
8.42933	98.5383	11.3448	-1.31169	91.3325	-0.105599
8.43767	98.6184	11.3441	-1.31053	91.3267	-0.105505
8.446	98.7038	11.3434	-1.30934	91.3211	-0.10541
8.45433	98.7905	11.3427	-1.30817	91.3153	-0.105315
8.46267	98.8729	11.342	-1.30699	91.3095	-0.105221
8.471	98.9542	11.3412	-1.30583	91.3037	-0.105127
8.47933	99.0389	11.3406	-1.30469	91.2984	-0.105035
8.48767	99.1236	11.3399	-1.30354	91.2926	-0.104943
8.496	99.2085	11.3391	-1.30239	91.2868	-0.10485
8.50433	99.2894	11.3384	-1.30125	91.281	-0.104758
8.51267	99.3768	11.3377	-1.30009	91.2753	-0.104665
8.521	99.4609	11.337	-1.29892	91.2699	-0.104571
8.52933	99.5441	11.3363	-1.29778	91.2642	-0.104479
8.53767	99.6308	11.3356	-1.29667	91.2587	-0.10439
8.546	99.7148	11.335	-1.29556	91.2533	-0.104301
8.55433	99.799	11.3343	-1.29444	91.2478	-0.10421
8.56267	99.8829	11.3336	-1.29328	91.2421	-0.104117
8.571	99.9671	11.3329	-1.29218	91.2368	-0.104028
8.57933	100.052	11.3323	-1.29106	91.2316	-0.103938
8.58767	100.136	11.3316	-1.28992	91.2261	-0.103846
8.596	100.22	11.3309	-1.2888	91.2209	-0.103756
8.60433	100.304	11.3302	-1.28774	91.2153	-0.10367
8.61267	100.389	11.3296	-1.28668	91.2097	-0.103585
8.621	100.476	11.3289	-1.28556	91.2042	-0.103495
8.62933	100.557	11.3282	-1.28446	91.1987	-0.103407
8.63767	100.641	11.3275	-1.28338	91.1934	-0.10332
8.646	100.726	11.3269	-1.28232	91.188	-0.103234
8.65433	100.811	11.3262	-1.28124	91.1824	-0.103147
8.66267	100.894	11.3255	-1.28018	91.1768	-0.103062
8.671	100.981	11.3248	-1.27912	91.1716	-0.102976
8.67933	101.065	11.3241	-1.27806	91.1662	-0.102892
8.68767	101.147	11.3235	-1.27699	91.1609	-0.102805
8.696	101.226	11.3228	-1.27591	91.1556	-0.102718
8.70433	101.309	11.3222	-1.27484	91.1501	-0.102632
8.71267	101.394	11.3215	-1.27379	91.1447	-0.102548
8.721	101.48	11.3208	-1.27274	91.1393	-0.102463
8.72933	101.565	11.3201	-1.27168	91.1338	-0.102378
8.73767	101.651	11.3195	-1.27064	91.1285	-0.102294
8.746	101.735	11.3188	-1.2696	91.1231	-0.10221
8.75433	101.817	11.3181	-1.26856	91.1173	-0.102127
8.76267	101.899	11.3174	-1.26751	91.1118	-0.102042
8.771	101.989	11.3167	-1.26647	91.1062	-0.101958
8.77933	102.068	11.316	-1.26547	91.1008	-0.101878
8.78767	102.154	11.3154	-1.26446	91.0956	-0.101797
8.796	102.237	11.3148	-1.26341	91.0905	-0.101712
8.80433	102.321	11.3141	-1.26235	91.0852	-0.101627
8.81267	102.405	11.3134	-1.26132	91.0797	-0.101544
8.821	102.488	11.3127	-1.26029	91.0743	-0.101461
8.82933	102.573	11.3121	-1.25925	91.0691	-0.101377
8.83767	102.656	11.3115	-1.25823	91.0639	-0.101295
8.846	102.743	11.3108	-1.25723	91.0587	-0.101214
8.85433	102.826	11.3101	-1.25622	91.0534	-0.101133
8.86267	102.91	11.3095	-1.25519	91.0481	-0.10105
8.871	102.993	11.3088	-1.25418	91.0426	-0.100969
8.87933	103.078	11.3081	-1.2532	91.0371	-0.10089
8.88767	103.16	11.3074	-1.25222	91.0317	-0.100811
8.896	103.247	11.3068	-1.25122	91.0264	-0.100731
8.90433	103.332	11.3061	-1.2502	91.0211	-0.100648
8.91267	103.417	11.3055	-1.24921	91.0157	-0.100569
8.921	103.499	11.3048	-1.24821	91.0104	-0.100488
8.92933	103.582	11.3042	-1.24717	91.0052	-0.100405
8.93767	103.664	11.3035	-1.24616	91	-0.100323
8.946	103.75	11.3029	-1.24514	90.9948	-0.100242
8.95433	103.833	11.3023	-1.24412	90.9899	-0.100159
8.96267	103.918	11.3016	-1.24308	90.9849	-0.100075
8.971	104.002	11.301	-1.24207	90.9798	-0.0999939
8.97933	104.09	11.3004	-1.24104	90.9748	-0.0999111
8.98767	104.172	11.2998	-1.24005	90.9698	-0.0998315
8.996	104.255	11.2991	-1.23903	90.9646	-0.0997493
9.00433	104.339	11.2985	-1.23801	90.9594	-0.0996671
9.01267	104.423	11.2978	-1.23702	90.9543	-0.0995872
9.021	104.507	11.2972	-1.236	90.9493	-0.0995052
9.02933	104.591	11.2966	-1.235	90.9441	-0.0994248
9.03767	104.673	11.2959	-1.234	90.939	-0.0993447
9.046	104.755	11.2953	-1.23301	90.934	-0.099265
9.05433	104.841	11.2947	-1.23203	90.9289	-0.0991857
9.06267	104.925	11.294	-1.23104	90.9238	-0.0991061
9.071	105.008	11.2934	-1.23003	90.9187	-0.0990251
9.07933	105.096	11.2928	-1.22909	90.9139	-0.0989491
9.08767	105.181	11.2922	-1.22816	90.9089	-0.0988741
9.096	105.261	11.2916	-1.22724	90.9038	-0.0987998
9.10433	105.345	11.2909	-1.22628	90.8988	-0.098723
9.11267	105.431	11.2903	-1.22532	90.8938	-0.0986459
9.121	105.513	11.2897	-1.22436	90.8887	-0.0985681
9.12933	105.596	11.289	-1.22341	90.8835	-0.0984916
9.13767	105.684	11.2884	-1.22246	90.8783	-0.0984156
9.146	105.766	11.2878	-1.22151	90.8734	-0.0983388
9.15433	105.852	11.2872	-1.22057	90.8684	-0.0982635
9.16267	105.939	11.2865	-1.21957	90.8632	-0.0981827
9.171	106.02	11.2859	-1.21857	90.8582	-0.098102
9.17933	106.106	11.2853	-1.21759	90.8533	-0.0980236
9.18767	106.189	11.2847	-1.21663	90.8483	-0.0979461
9.196	106.274	11.284	-1.21568	90.8431	-0.0978695
9.20433	106.358	11.2834	-1.21471	90.8382	-0.0977916
9.21267	106.443	11.2828	-1.21376	90.8332	-0.097715
9.221	106.524	11.2822	-1.2128	90.8281	-0.097638
9.22933	106.611	11.2815	-1.21186	90.8231	-0.0975621
9.23767	106.698	11.2809	-1.21093	90.8181	-0.0974871
9.246	106.775	11.2803	-1.20999	90.8131	-0.0974115
9.25433	106.863	11.2797	-1.20908	90.8082	-0.0973385
9.26267	106.949	11.2791	-1.20815	90.8032	-0.0972636
9.271	107.032	11.2785	-1.20727	90.7983	-0.0971924
9.27933	107.112	11.2779	-1.20636	90.7934	-0.0971195
9.28767	107.197	11.2772	-1.20548	90.7883	-0.0970482
9.296	107.281	11.2766	-1.20457	90.7834	-0.0969748
9.30433	107.367	11.276	-1.20369	90.7786	-0.0969039
9.31267	107.452	11.2754	-1.20281	90.7739	-0.0968334
9.321	107.536	11.2748	-1.2019	90.7689	-0.0967602
9.32933	107.618	11.2742	-1.20102	90.764	-0.0966896
9.33767	107.705	11.2736	-1.20011	90.7589	-0.0966162
9.346	107.788	11.2729	-1.19921	90.754	-0.0965438
9.35433	107.873	11.2723	-1.1983	90.7491	-0.09647
9.36267	107.953	11.2717	-1.1974	90.7441	-0.0963975
9.371	108.041	11.2711	-1.1965	90.7393	-0.0963252
9.37933	108.124	11.2705	-1.1956	90.7344	-0.0962528
9.38767	108.209	11.2699	-1.19466	90.7296	-0.0961771
9.396	108.295	11.2693	-1.19373	90.7247	-0.0961024
9.40433	108.381	11.2687	-1.19284	90.7199	-0.0960311
9.41267	108.461	11.2681	-1.19198	90.7152	-0.0959616
9.421	108.546	11.2675	-1.1911	90.7104	-0.0958908
9.42933	108.625	11.267	-1.19022	90.7057	-0.09582
9.43767	108.711	11.2664	-1.18935	90.7011	-0.0957496
9.446	108.791	11.2658	-1.1885	90.6966	-0.0956813
9.45433	108.879	11.2652	-1.18767	90.6917	-0.0956144
9.46267	108.96	11.2646	-1.18682	90.6871	-0.095546
9.471	109.045	11.2641	-1.18597	90.6824	-0.0954777
9.47933	109.132	11.2635	-1.18511	90.6777	-0.0954083
9.48767	109.218	11.2629	-1.18427	90.6727	-0.0953406
9.496	109.3	11.2623	-1.18338	90.6679	-0.0952692
9.50433	109.386	11.2617	-1.18252	90.6632	-0.0952002
9.51267	109.471	11.2611	-1.18166	90.6584	-0.0951304
9.521	109.553	11.2605	-1.1808	90.6534	-0.0950612
9.52933	109.634	11.2598	-1.17989	90.6483	-0.0949885
9.53767	109.722	11.2592	-1.17898	90.6434	-0.0949151
9.546	109.808	11.2586	-1.1781	90.6384	-0.0948442
9.55433	109.892	11.258	-1.17724	90.6336	-0.0947751
9.56267	109.97	11.2574	-1.1764	90.629	-0.0947074
9.571	110.061	11.2568	-1.17554	90.6243	-0.0946382
9.57933	110.141	11.2562	-1.17471	90.6194	-0.0945716
9.58767	110.229	11.2556	-1.17384	90.6145	-0.0945014
9.596	110.314	11.2551	-1.17302	90.6099	-0.0944348
9.60433	110.398	11.2545	-1.17218	90.6053	-0.0943678
9.61267	110.479	11.2539	-1.17136	90.6008	-0.0943011
9.621	110.564	11.2534	-1.17054	90.5963	-0.0942358
9.62933	110.644	11.2528	-1.16975	90.5917	-0.0941719
9.63767	110.734	11.2522	-1.16892	90.5869	-0.0941052
9.646	110.814	11.2516	-1.16811	90.5822	-0.09404
9.65433	110.902	11.251	-1.16733	90.5774	-0.093977
9.66267	110.982	11.2505	-1.16654	90.5729	-0.0939132
9.671	111.068	11.2499	-1.16574	90.5682	-0.0938492
9.67933	111.152	11.2493	-1.16492	90.5635	-0.0937828
9.68767	111.239	11.2487	-1.16413	90.5589	-0.0937195
9.696	111.322	11.2481	-1.16338	90.5542	-0.0936594
9.70433	111.405	11.2475	-1.1626	90.5493	-0.0935963
9.71267	111.492	11.2469	-1.16181	90.5446	-0.0935328
9.721	111.573	11.2464	-1.16101	90.54	-0.0934682
9.72933	111.656	11.2458	-1.16021	90.5353	-0.0934037
9.73767	111.743	11.2453	-1.15934	90.531	-0.0933341
9.746	111.822	11.2447	-1.1585	90.5264	-0.0932662
9.75433	111.91	11.2441	-1.15769	90.5218	-0.0932013
9.76267	111.991	11.2435	-1.15688	90.517	-0.0931356
9.771	112.078	11.2429	-1.15604	90.5122	-0.0930685
9.77933	112.16	11.2423	-1.15522	90.5075	-0.0930019
9.78767	112.248	11.2418	-1.15439	90.5031	-0.0929351
9.796	112.328	11.2412	-1.15356	90.4985	-0.0928683
9.80433	112.417	11.2407	-1.15278	90.494	-0.0928054
9.81267	112.495	11.2401	-1.15198	90.4894	-0.092741
9.821	112.582	11.2395	-1.1512	90.4845	-0.0926788
9.82933	112.665	11.2389	-1.15044	90.4801	-0.0926171
9.83767	112.747	11.2384	-1.14969	90.4755	-0.0925566
9.846	112.83	11.2378	-1.14892	90.471	-0.0924948
9.85433	112.918	11.2373	-1.14816	90.4667	-0.0924339
9.86267	112.999	11.2367	-1.14739	90.4621	-0.092372
9.871	113.087	11.2361	-1.14663	90.4576	-0.0923109
9.87933	113.171	11.2356	-1.14588	90.453	-0.0922499
9.88767	113.255	11.235	-1.14514	90.4485	-0.0921908
9.896	113.34	11.2344	-1.1444	90.4438	-0.0921306
9.90433	113.425	11.2339	-1.14366	90.4392	-0.0920711
9.91267	113.508	11.2333	-1.1429	90.4345	-0.0920104
9.921	113.593	11.2327	-1.14213	90.4299	-0.0919484
9.92933	113.677	11.2321	-1.14138	90.4253	-0.0918879
9.93767	113.758	11.2315	-1.1406	90.4204	-0.0918251
9.946	113.841	11.231	-1.13983	90.4161	-0.0917628
9.95433	113.926	11.2304	-1.13909	90.4115	-0.0917037
9.96267	114.007	11.2298	-1.13836	90.4069	-0.0916445
9.971	114.093	11.2293	-1.13759	90.4024	-0.0915832
9.97933	114.178	11.2287	-1.13684	90.3981	-0.0915226
9.98767	114.263	11.2282	-1.13611	90.3938	-0.0914633
9.996	114.348	11.2277	-1.13538	90.3894	-0.0914052
10.0043	114.436	11.2271	-1.13463	90.3852	-0.0913443
10.0127	114.511	11.2266	-1.13393	90.3808	-0.0912884
10.021	114.601	11.2261	-1.13324	90.3768	-0.0912328
10.0293	114.682	11.2256	-1.13254	90.3724	-0.0911761
10.0377	114.769	11.225	-1.13178	90.368	-0.0911154
10.046	114.849	11.2245	-1.13106	90.3637	-0.091057
10.0543	114.934	11.224	-1.13032	90.3595	-0.0909976
10.0627	115.017	11.2234	-1.12962	90.3551	-0.0909412
10.071	115.103	11.2228	-1.12889	90.3506	-0.0908821
10.0793	115.188	11.2223	-1.12815	90.3463	-0.0908229
10.0877	115.274	11.2218	-1.12747	90.3419	-0.0907682
10.096	115.359	11.2212	-1.12677	90.3374	-0.0907119
10.1043	115.443	11.2206	-1.12606	90.3329	-0.0906546
10.1127	115.522	11.2201	-1.12534	90.3285	-0.0905969
10.121	115.612	11.2196	-1.12465	90.3241	-0.090541
10.1293	115.689	11.219	-1.12394	90.3198	-0.0904838
10.1377	115.779	11.2185	-1.12327	90.3152	-0.0904299
10.146	115.862	11.2179	-1.12255	90.3106	-0.0903723
10.1543	115.947	11.2173	-1.12188	90.3062	-0.090318
10.1627	116.028	11.2168	-1.12122	90.3016	-0.0902648
10.171	116.115	11.2162	-1.12056	90.2971	-0.090212
10.1793	116.195	11.2157	-1.11986	90.2928	-0.0901557
10.1877	116.28	11.2151	-1.1192	90.2882	-0.090102
10.196	116.365	11.2146	-1.11855	90.2841	-0.0900496
10.2043	116.448	11.214	-1.1179	90.2795	-0.089998
10.2127	116.531	11.2134	-1.11726	90.2749	-0.0899465
10.221	116.621	11.2129	-1.1166	90.2706	-0.0898927
10.2293	116.701	11.2124	-1.11594	90.2662	-0.08984
10.2377	116.787	11.2118	-1.11531	90.262	-0.0897888
10.246	116.868	11.2113	-1.11463	90.2578	-0.0897345
10.2543	116.954	11.2108	-1.11395	90.2538	-0.0896794
10.2627	117.036	11.2103	-1.11328	90.2496	-0.0896257
10.271	117.126	11.2098	-1.11261	90.2453	-0.0895721
10.2793	117.206	11.2092	-1.11195	90.241	-0.0895186
10.2877	117.293	11.2087	-1.11129	90.2366	-0.0894658
10.296	117.379	11.2082	-1.11059	90.2327	-0.0894094
10.3043	117.467	11.2077	-1.10992	90.2285	-0.0893549
10.3127	117.545	11.2072	-1.10927	90.2245	-0.0893029
10.321	117.63	11.2067	-1.10858	90.2203	-0.0892475
10.3293	117.709	11.2061	-1.10794	90.2159	-0.0891956
10.3377	117.795	11.2056	-1.10736	90.2114	-0.0891488
10.346	117.879	11.205	-1.10675	90.2069	-0.0891001
10.3543	117.963	11.2045	-1.10613	90.2027	-0.08905
10.3627	118.045	11.204	-1.10547	90.1986	-0.0889966
10.371	118.133	11.2034	-1.10481	90.1941	-0.0889435
10.3793	118.216	11.2028	-1.10421	90.1896	-0.0888959
10.3877	118.299	11.2023	-1.1036	90.1852	-0.0888468
10.396	118.386	11.2018	-1.10299	90.1808	-0.0887969
10.4043	118.469	11.2012	-1.10238	90.1765	-0.0887485
10.4127	118.551	11.2007	-1.10176	90.1722	-0.0886983
10.421	118.637	11.2002	-1.10107	90.1679	-0.0886429
10.4293	118.721	11.1996	-1.10044	90.1636	-0.0885922
10.4377	118.807	11.1991	-1.09984	90.1591	-0.0885437
10.446	118.888	11.1985	-1.09927	90.1546	-0.0884979
10.4543	118.975	11.198	-1.09871	90.1504	-0.0884528
10.4627	119.057	11.1975	-1.09811	90.1462	-0.0884043
10.471	119.144	11.1969	-1.0975	90.1418	-0.0883555
10.4793	119.226	11.1964	-1.09692	90.1375	-0.0883082
10.4877	119.31	11.1958	-1.09635	90.1332	-0.0882625
10.496	119.393	11.1953	-1.09577	90.1288	-0.0882157
10.5043	119.472	11.1948	-1.09517	90.1247	-0.0881677
10.5127	119.56	11.1942	-1.09455	90.1203	-0.0881177
10.521	119.648	11.1937	-1.09393	90.1161	-0.0880678
10.5293	119.729	11.1932	-1.09333	90.1119	-0.0880197
10.5377	119.819	11.1927	-1.09273	90.1077	-0.0879714
10.546	119.898	11.1921	-1.09216	90.1035	-0.0879256
10.5543	119.983	11.1917	-1.09161	90.0995	-0.0878811
10.5627	120.068	11.1911	-1.09103	90.0954	-0.0878341
10.571	120.156	11.1906	-1.09044	90.0912	-0.0877868
10.5793	120.237	11.1901	-1.08989	90.087	-0.0877426
10.5877	120.318	11.1896	-1.08937	90.0827	-0.0877005
10.596	120.402	11.1891	-1.08885	90.0788	-0.0876592
10.6043	120.492	11.1886	-1.08833	90.0747	-0.0876171
10.6127	120.573	11.1881	-1.08779	90.0707	-0.0875739
10.621	120.653	11.1875	-1.08727	90.0664	-0.087532
10.6293	120.738	11.1871	-1.0867	90.0625	-0.0874859
10.6377	120.825	11.1865	-1.08612	90.0583	-0.0874389
10.646	120.902	11.186	-1.08558	90.054	-0.0873957
10.6543	120.992	11.1855	-1.08504	90.0497	-0.087352
10.6627	121.071	11.185	-1.08448	90.0455	-0.087307
10.671	121.161	11.1845	-1.08394	90.0415	-0.0872633
10.6793	121.245	11.1839	-1.08338	90.0373	-0.0872186
10.6877	121.327	11.1834	-1.08287	90.0329	-0.0871774
10.696	121.41	11.1829	-1.08237	90.0286	-0.0871369
10.7043	121.497	11.1823	-1.08184	90.0245	-0.0870946
10.7127	121.578	11.1818	-1.08136	90.0202	-0.0870556
10.721	121.664	11.1813	-1.08088	90.0161	-0.0870169
10.7293	121.749	11.1808	-1.08036	90.0122	-0.0869752
10.7377	121.835	11.1803	-1.07987	90.008	-0.0869361
10.746	121.914	11.1798	-1.07936	90.004	-0.0868945
10.7543	122.001	11.1793	-1.07885	89.9998	-0.086854
10.7627	122.084	11.1788	-1.07835	89.9956	-0.0868138
10.771	122.166	11.1782	-1.07781	89.9915	-0.0867698
10.7793	122.248	11.1777	-1.07725	89.9875	-0.086725
10.7877	122.334	11.1772	-1.07673	89.9834	-0.0866833
10.796	122.417	11.1767	-1.07621	89.9793	-0.0866417
10.8043	122.504	11.1762	-1.0757	89.975	-0.0866005
10.8127	122.587	11.1757	-1.0752	89.9708	-0.0865598
10.821	122.672	11.1752	-1.07467	89.9666	-0.086517
10.8293	122.754	11.1746	-1.0742	89.9625	-0.0864793
10.8377	122.84	11.1741	-1.07371	89.9583	-0.0864398
10.846	122.922	11.1736	-1.07322	89.9541	-0.0864006
10.8543	123.008	11.1731	-1.07274	89.9498	-0.0863619
10.8627	123.092	11.1725	-1.07226	89.9454	-0.0863235
10.871	123.174	11.172	-1.07176	89.9414	-0.0862827
10.8793	123.26	11.1715	-1.07127	89.937	-0.0862435
10.8877	123.341	11.1709	-1.0708	89.9327	-0.0862056
10.896	123.428	11.1704	-1.07031	89.9285	-0.0861663
10.9043	123.508	11.1699	-1.06982	89.924	-0.0861268
10.9127	123.594	11.1693	-1.0693	89.9198	-0.0860852
10.921	123.68	11.1688	-1.06879	89.9155	-0.0860436
10.9293	123.762	11.1683	-1.0683	89.9114	-0.0860048
10.9377	123.844	11.1678	-1.06782	89.9072	-0.0859659
10.946	123.929	11.1672	-1.06736	89.9029	-0.0859285
10.9543	124.013	11.1667	-1.06688	89.8988	-0.0858905
10.9627	124.099	11.1662	-1.06641	89.8949	-0.0858525
10.971	124.183	11.1657	-1.06593	89.8908	-0.0858137
10.9793	124.261	11.1652	-1.0655	89.8867	-0.0857789
10.9877	124.348	11.1647	-1.06504	89.8827	-0.0857423
10.996	124.434	11.1642	-1.06461	89.8785	-0.0857071
11.0043	124.517	11.1637	-1.06417	89.8743	-0.0856721
11.0127	124.594	11.1632	-1.06371	89.8703	-0.0856352
11.021	124.682	11.1627	-1.06326	89.8666	-0.0855992
11.0293	124.765	11.1622	-1.06282	89.8627	-0.0855634
11.0377	124.846	11.1617	-1.06237	89.8586	-0.085527
11.046	124.933	11.1612	-1.06191	89.8544	-0.0854898
11.0543	125.021	11.1607	-1.06145	89.8504	-0.0854533
11.0627	125.106	11.1602	-1.06099	89.8463	-0.0854159
11.071	125.187	11.1597	-1.06055	89.8424	-0.0853804
11.0793	125.273	11.1592	-1.06007	89.8385	-0.0853419
11.0877	125.352	11.1587	-1.05962	89.8345	-0.0853056
11.096	125.437	11.1582	-1.05913	89.8304	-0.085266
11.1043	125.524	11.1577	-1.05864	89.8261	-0.0852272
11.1127	125.61	11.1572	-1.05815	89.8221	-0.0851872
11.121	125.692	11.1567	-1.05768	89.8181	-0.0851499
11.1293	125.775	11.1562	-1.05726	89.8141	-0.0851157
11.1377	125.859	11.1557	-1.0568	89.81	-0.085079
11.146	125.941	11.1552	-1.05637	89.806	-0.0850444
11.1543	126.028	11.1547	-1.0559	89.8019	-0.0850066
11.1627	126.112	11.1542	-1.05546	89.798	-0.0849707
11.171	126.193	11.1537	-1.055	89.7939	-0.0849335
11.1793	126.279	11.1532	-1.05457	89.7896	-0.0848994
11.1877	126.362	11.1526	-1.05417	89.7855	-0.0848666
11.196	126.448	11.1522	-1.05375	89.7815	-0.0848336
11.2043	126.534	11.1517	-1.05335	89.7774	-0.0848012
11.2127	126.613	11.1511	-1.05291	89.7731	-0.0847655
11.221	126.697	11.1506	-1.05251	89.7691	-0.084733
11.2293	126.782	11.1501	-1.05206	89.7652	-0.0846969
11.2377	126.864	11.1496	-1.05165	89.7613	-0.0846639
11.246	126.945	11.1492	-1.05123	89.7573	-0.0846299
11.2543	127.03	11.1487	-1.05084	89.7534	-0.0845987
11.2627	127.119	11.1482	-1.05043	89.7497	-0.084566
11.271	127.201	11.1477	-1.05	89.7458	-0.0845309
11.2793	127.284	11.1472	-1.04958	89.7418	-0.0844977
11.2877	127.367	11.1467	-1.04915	89.7377	-0.0844628
11.296	127.453	11.1463	-1.04872	89.734	-0.0844284
11.3043	127.538	11.1458	-1.04828	89.7301	-0.0843926
11.3127	127.621	11.1453	-1.04786	89.7262	-0.0843589
11.321	127.7	11.1448	-1.04747	89.7221	-0.0843272
11.3293	127.788	11.1443	-1.04708	89.7181	-0.0842963
11.3377	127.87	11.1438	-1.04668	89.714	-0.0842642
11.346	127.953	11.1433	-1.04628	89.7099	-0.0842319
11.3543	128.038	11.1428	-1.04593	89.7059	-0.0842034
11.3627	128.123	11.1423	-1.04554	89.7021	-0.0841722
11.371	128.211	11.1418	-1.04514	89.6982	-0.0841401
11.3793	128.292	11.1413	-1.04473	89.6943	-0.0841068
11.3877	128.376	11.1408	-1.04432	89.6902	-0.0840744
11.396	128.457	11.1403	-1.04389	89.6861	-0.0840391
11.4043	128.545	11.1398	-1.04344	89.682	-0.0840028
11.4127	128.624	11.1393	-1.04301	89.678	-0.0839688
11.421	128.708	11.1388	-1.04259	89.674	-0.0839344
11.4293	128.793	11.1383	-1.04216	89.6699	-0.0839003
11.4377	128.875	11.1378	-1.04174	89.6659	-0.083866
11.446	128.957	11.1373	-1.04135	89.662	-0.0838352
11.4543	129.042	11.1368	-1.04095	89.6582	-0.0838025
11.4627	129.124	11.1364	-1.04055	89.6543	-0.0837702
11.471	129.209	11.1358	-1.04017	89.6501	-0.0837402
11.4793	129.29	11.1354	-1.03984	89.6462	-0.0837132
11.4877	129.376	11.1349	-1.03948	89.6423	-0.0836841
11.496	129.459	11.1344	-1.0391	89.6383	-0.0836533
11.5043	129.541	11.1339	-1.03869	89.6345	-0.0836203
11.5127	129.624	11.1334	-1.03831	89.6308	-0.0835898
11.521	129.712	11.1329	-1.0379	89.6267	-0.0835568
11.5293	129.792	11.1324	-1.03744	89.6228	-0.0835203
11.5377	129.88	11.1319	-1.03705	89.6185	-0.0834886
11.546	129.96	11.1314	-1.03668	89.6142	-0.0834592
11.5543	130.046	11.1309	-1.03629	89.6105	-0.0834274
11.5627	130.131	11.1304	-1.03587	89.6064	-0.083394
11.571	130.212	11.1299	-1.03547	89.6025	-0.0833616
11.5793	130.294	11.1294	-1.03508	89.5983	-0.08333
11.5877	130.384	11.1289	-1.03469	89.5941	-0.0832983
11.596	130.467	11.1284	-1.03426	89.59	-0.0832639
11.6043	130.553	11.1279	-1.03382	89.5859	-0.083229
11.6127	130.633	11.1274	-1.03342	89.5819	-0.0831966
11.621	130.716	11.1269	-1.033	89.578	-0.0831628
11.6293	130.799	11.1264	-1.03259	89.5744	-0.0831296
11.6377	130.882	11.1259	-1.03214	89.5705	-0.0830936
11.646	130.967	11.1255	-1.03172	89.5666	-0.0830599
11.6543	131.054	11.125	-1.03133	89.5626	-0.083028
11.6627	131.132	11.1245	-1.03089	89.5589	-0.0829932
11.671	131.223	11.124	-1.0305	89.5552	-0.0829614
11.6793	131.303	11.1236	-1.03012	89.5513	-0.0829306
11.6877	131.389	11.1231	-1.02977	89.5476	-0.0829025
11.696	131.472	11.1226	-1.0294	89.5438	-0.082873
11.7043	131.557	11.1221	-1.02903	89.5399	-0.0828433
11.7127	131.636	11.1217	-1.02864	89.5359	-0.0828114
11.721	131.721	11.1212	-1.02827	89.532	-0.0827817
11.7293	131.806	11.1207	-1.02789	89.5281	-0.0827516
11.7377	131.89	11.1202	-1.02748	89.5242	-0.0827181
11.746	131.972	11.1197	-1.02708	89.5204	-0.0826859
11.7543	132.062	11.1192	-1.02667	89.5166	-0.0826529
11.7627	132.142	11.1188	-1.02625	89.5126	-0.0826196
11.771	132.225	11.1183	-1.0258	89.5088	-0.0825832
11.7793	132.304	11.1178	-1.02537	89.5048	-0.0825486
11.7877	132.395	11.1173	-1.02492	89.5009	-0.0825123
11.796	132.476	11.1168	-1.02449	89.497	-0.0824777
11.8043	132.565	11.1164	-1.02407	89.4933	-0.0824437
11.8127	132.645	11.1159	-1.02363	89.4895	-0.0824082
11.821	132.733	11.1154	-1.02322	89.4858	-0.0823756
11.8293	132.808	11.115	-1.02282	89.482	-0.0823434
11.8377	132.898	11.1145	-1.02239	89.4784	-0.0823085
11.846	132.979	11.114	-1.02194	89.4747	-0.0822723
11.8543	133.062	11.1136	-1.02151	89.4709	-0.0822378
11.8627	133.146	11.1131	-1.02109	89.4672	-0.0822036
11.871	133.234	11.1127	-1.02068	89.4635	-0.0821707
11.8793	133.318	11.1122	-1.02022	89.46	-0.082134
11.8877	133.399	11.1118	-1.01977	89.4562	-0.0820975
11.896	133.481	11.1113	-1.01933	89.4524	-0.0820618
11.9043	133.565	11.1108	-1.01886	89.4486	-0.0820244
11.9127	133.646	11.1103	-1.01841	89.4449	-0.0819881
11.921	133.732	11.1098	-1.01793	89.4408	-0.0819496
11.9293	133.816	11.1093	-1.01752	89.4369	-0.0819162
11.9377	133.897	11.1089	-1.01709	89.4329	-0.0818816
11.946	133.982	11.1084	-1.01664	89.429	-0.0818457
11.9543	134.069	11.1079	-1.01616	89.4251	-0.0818071
11.9627	134.151	11.1074	-1.01571	89.4214	-0.0817706
11.971	134.234	11.107	-1.01524	89.4177	-0.081733
11.9793	134.316	11.1065	-1.01478	89.4139	-0.0816961
11.9877	134.406	11.106	-1.01434	89.4102	-0.0816607
11.996	134.486	11.1056	-1.01388	89.4065	-0.0816235
12.0043	134.572	11.1051	-1.01347	89.4029	-0.0815903
12.0127	134.653	11.1047	-1.01303	89.3994	-0.0815546
12.021	134.738	11.1043	-1.01258	89.3959	-0.0815184
12.0293	134.821	11.1038	-1.01215	89.3923	-0.0814842
12.0377	134.913	11.1034	-1.01174	89.3888	-0.0814508
12.046	134.987	11.1029	-1.0113	89.3852	-0.0814158
12.0543	135.077	11.1025	-1.01087	89.3815	-0.0813811
12.0627	135.159	11.102	-1.01043	89.378	-0.081346
12.071	135.244	11.1016	-1.00998	89.3743	-0.0813092
12.0793	135.326	11.1011	-1.0095	89.3706	-0.0812709
12.0877	135.41	11.1007	-1.00905	89.3671	-0.0812347
12.096	135.494	11.1002	-1.0086	89.3632	-0.0811987
12.1043	135.58	11.0997	-1.00817	89.3594	-0.0811636
12.1127	135.66	11.0993	-1.00767	89.3557	-0.0811234
12.121	135.747	11.0988	-1.00722	89.3522	-0.0810873
12.1293	135.827	11.0984	-1.00677	89.3484	-0.081051
12.1377	135.913	11.0979	-1.00632	89.3448	-0.0810146
12.146	135.995	11.0975	-1.00583	89.3412	-0.0809756
12.1543	136.082	11.097	-1.00537	89.3375	-0.0809384
12.1627	136.165	11.0966	-1.00494	89.3338	-0.0809035
12.171	136.244	11.0961	-1.00447	89.3301	-0.0808657
12.1793	136.334	11.0956	-1.00397	89.3266	-0.0808253
12.1877	136.419	11.0952	-1.00347	89.3231	-0.0807852
12.196	136.501	11.0948	-1.00302	89.3195	-0.0807488
12.2043	136.588	11.0943	-1.00251	89.3157	-0.0807084
12.2127	136.669	11.0938	-1.00204	89.3118	-0.08067
12.221	136.753	11.0934	-1.00158	89.3082	-0.0806334
12.2293	136.836	11.0929	-1.00114	89.3045	-0.0805977
12.2377	136.922	11.0925	-1.00066	89.3012	-0.0805594
12.246	137.004	11.0921	-1.0002	89.2977	-0.0805221
12.2543	137.09	11.0916	-0.999725	89.2942	-0.0804838
12.2627	137.173	11.0912	-0.999284	89.2907	-0.0804483
12.271	137.259	11.0908	-0.998844	89.2872	-0.0804129
12.2793	137.341	11.0903	-0.998358	89.2835	-0.0803738
12.2877	137.428	11.0899	-0.997899	89.2802	-0.0803368
12.296	137.511	11.0895	-0.997403	89.2769	-0.0802969
12.3043	137.595	11.0891	-0.996925	89.2735	-0.0802584
12.3127	137.679	11.0886	-0.996427	89.2702	-0.0802183
12.321	137.764	11.0882	-0.995942	89.2665	-0.0801793
12.3293	137.843	11.0878	-0.99546	89.2631	-0.0801404
12.3377	137.932	11.0873	-0.994975	89.2595	-0.0801015
12.346	138.015	11.0869	-0.994479	89.2558	-0.0800615
12.3543	138.098	11.0864	-0.993993	89.2521	-0.0800223
12.3627	138.184	11.086	-0.993545	89.2488	-0.0799863
12.371	138.268	11.0855	-0.993107	89.2453	-0.079951
12.3793	138.353	11.0851	-0.992688	89.2417	-0.0799173
12.3877	138.433	11.0847	-0.9922	89.2381	-0.079878
12.396	138.52	11.0842	-0.99174	89.2344	-0.079841
12.4043	138.602	11.0838	-0.991281	89.231	-0.079804
12.4127	138.687	11.0833	-0.990772	89.2273	-0.0797631
12.421	138.769	11.0829	-0.990305	89.2238	-0.0797255
12.4293	138.856	11.0824	-0.989856	89.2203	-0.0796893
12.4377	138.941	11.082	-0.989386	89.2169	-0.0796515
12.446	139.022	11.0816	-0.98889	89.2133	-0.0796115
12.4543	139.107	11.0811	-0.988398	89.2096	-0.079572
12.4627	139.188	11.0806	-0.987936	89.2058	-0.0795348
12.471	139.273	11.0802	-0.987524	89.2021	-0.0795016
12.4793	139.358	11.0798	-0.987056	89.1988	-0.0794639
12.4877	139.44	11.0793	-0.986616	89.1953	-0.0794284
12.496	139.526	11.0789	-0.986201	89.1916	-0.0793951
12.5043	139.61	11.0785	-0.985772	89.1882	-0.0793605
12.5127	139.697	11.078	-0.985324	89.1847	-0.0793244
12.521	139.778	11.0776	-0.984868	89.1813	-0.0792877
12.5293	139.861	11.0772	-0.984447	89.178	-0.0792539
12.5377	139.946	11.0768	-0.983984	89.1746	-0.0792166
12.546	140.029	11.0764	-0.983503	89.1715	-0.0791779
12.5543	140.113	11.076	-0.983027	89.168	-0.0791396
12.5627	140.194	11.0755	-0.98261	89.1643	-0.079106
12.571	140.279	11.0751	-0.982158	89.1608	-0.0790696
12.5793	140.364	11.0747	-0.981707	89.1576	-0.0790333
12.5877	140.446	11.0742	-0.981269	89.1541	-0.078998
12.596	140.529	11.0738	-0.980818	89.1509	-0.0789617
12.6043	140.614	11.0734	-0.980381	89.1475	-0.0789265
12.6127	140.699	11.073	-0.979939	89.1439	-0.0788909
12.621	140.784	11.0725	-0.979502	89.1406	-0.0788558
12.6293	140.865	11.0721	-0.979061	89.1371	-0.0788202
12.6377	140.948	11.0717	-0.978626	89.1336	-0.0787852
12.646	141.034	11.0712	-0.978179	89.1302	-0.0787493
12.6543	141.115	11.0708	-0.977749	89.1268	-0.0787146
12.6627	141.202	11.0704	-0.977323	89.1232	-0.0786803
12.671	141.287	11.07	-0.976853	89.1198	-0.0786425
12.6793	141.369	11.0695	-0.976403	89.1164	-0.0786062
12.6877	141.455	11.0691	-0.97597	89.1131	-0.0785714
12.696	141.535	11.0687	-0.975517	89.1099	-0.0785349
12.7043	141.623	11.0683	-0.97508	89.1064	-0.0784998
12.7127	141.706	11.0679	-0.974656	89.103	-0.0784657
12.721	141.786	11.0675	-0.974225	89.0997	-0.078431
12.7293	141.874	11.0671	-0.97377	89.0964	-0.0783943
12.7377	141.959	11.0666	-0.973344	89.0931	-0.07836
12.746	142.042	11.0662	-0.97293	89.0898	-0.0783267
12.7543	142.122	11.0658	-0.972515	89.0863	-0.0782933
12.7627	142.21	11.0654	-0.972078	89.0828	-0.078258
12.771	142.289	11.0649	-0.971669	89.0794	-0.0782251
12.7793	142.376	11.0645	-0.971268	89.0758	-0.0781929
12.7877	142.46	11.0641	-0.970868	89.0725	-0.0781606
12.796	142.545	11.0637	-0.970468	89.0691	-0.0781285
12.8043	142.626	11.0633	-0.970037	89.0659	-0.0780938
12.8127	142.709	11.0629	-0.969638	89.0629	-0.0780616
12.821	142.792	11.0625	-0.969224	89.0593	-0.0780283
12.8293	142.877	11.062	-0.968802	89.056	-0.0779944
12.8377	142.961	11.0616	-0.968405	89.0528	-0.0779624
12.846	143.042	11.0612	-0.968035	89.0493	-0.0779326
12.8543	143.126	11.0608	-0.96763	89.046	-0.0779
12.8627	143.211	11.0604	-0.967193	89.0427	-0.0778648
12.871	143.294	11.06	-0.966758	89.0394	-0.0778298
12.8793	143.376	11.0596	-0.966343	89.0361	-0.0777964
12.8877	143.463	11.0592	-0.965943	89.0328	-0.0777642
12.896	143.549	11.0587	-0.965554	89.0294	-0.0777329
12.9043	143.633	11.0583	-0.965129	89.0257	-0.0776986
12.9127	143.709	11.0579	-0.964737	89.0224	-0.0776671
12.921	143.8	11.0574	-0.964346	89.019	-0.0776356
12.9293	143.882	11.057	-0.963927	89.0158	-0.0776019
12.9377	143.967	11.0566	-0.963515	89.0124	-0.0775687
12.946	144.054	11.0562	-0.963151	89.0091	-0.0775394
12.9543	144.135	11.0558	-0.962777	89.0056	-0.0775093
12.9627	144.216	11.0554	-0.962353	89.0022	-0.0774752
12.971	144.3	11.0549	-0.961958	88.9988	-0.0774433
12.9793	144.383	11.0545	-0.961558	88.9956	-0.0774111
12.9877	144.467	11.0541	-0.96122	88.9925	-0.077384
12.996	144.551	11.0537	-0.960847	88.9892	-0.0773539
13.0043	144.631	11.0533	-0.960475	88.9858	-0.077324
13.0127	144.718	11.0529	-0.960122	88.9827	-0.0772955
13.021	144.806	11.0525	-0.959763	88.9795	-0.0772667
13.0293	144.884	11.0521	-0.959398	88.9762	-0.0772373
13.0377	144.968	11.0517	-0.959067	88.9729	-0.0772107
13.046	145.05	11.0513	-0.95875	88.9696	-0.0771851
13.0543	145.135	11.0509	-0.958437	88.966	-0.0771599
13.0627	145.217	11.0504	-0.958123	88.9625	-0.0771346
13.071	145.3	11.05	-0.957755	88.959	-0.077105
13.0793	145.389	11.0496	-0.957384	88.9557	-0.0770752
13.0877	145.473	11.0492	-0.957045	88.9525	-0.0770479
13.096	145.553	11.0488	-0.956695	88.9491	-0.0770196
13.1043	145.637	11.0483	-0.956375	88.9456	-0.0769939
13.1127	145.72	11.0479	-0.956048	88.9422	-0.0769675
13.121	145.807	11.0475	-0.955718	88.9387	-0.076941
13.1293	145.887	11.0471	-0.955387	88.9353	-0.0769144
13.1377	145.975	11.0466	-0.95506	88.9321	-0.076888
13.146	146.054	11.0462	-0.954724	88.9287	-0.076861
13.1543	146.14	11.0458	-0.954385	88.9254	-0.0768337
13.1627	146.223	11.0454	-0.95408	88.9221	-0.0768091
13.171	146.307	11.045	-0.953744	88.9186	-0.0767821
13.1793	146.391	11.0445	-0.953421	88.9151	-0.0767561
13.1877	146.477	11.0441	-0.953064	88.9118	-0.0767273
13.196	146.558	11.0437	-0.952729	88.9085	-0.0767004
13.2043	146.64	11.0433	-0.952406	88.9052	-0.0766743
13.2127	146.72	11.0429	-0.952118	88.9019	-0.0766512
13.221	146.807	11.0425	-0.951802	88.8987	-0.0766257
13.2293	146.89	11.0421	-0.951457	88.8953	-0.076598
13.2377	146.973	11.0417	-0.951143	88.8921	-0.0765727
13.246	147.054	11.0413	-0.950832	88.8887	-0.0765476
13.2543	147.142	11.0408	-0.950509	88.8853	-0.0765216
13.2627	147.221	11.0404	-0.950187	88.882	-0.0764957
13.271	147.307	11.04	-0.949896	88.8785	-0.0764723
13.2793	147.389	11.0396	-0.949603	88.875	-0.0764487
13.2877	147.472	11.0391	-0.949273	88.8717	-0.0764221
13.296	147.556	11.0387	-0.94891	88.8684	-0.0763929
13.3043	147.642	11.0383	-0.948566	88.865	-0.0763652
13.3127	147.722	11.0379	-0.948259	88.8618	-0.0763405
13.321	147.806	11.0375	-0.94798	88.8582	-0.0763181
13.3293	147.887	11.0371	-0.947671	88.8548	-0.0762932
13.3377	147.974	11.0366	-0.947369	88.8514	-0.0762689
13.346	148.058	11.0362	-0.947071	88.848	-0.0762448
13.3543	148.143	11.0358	-0.946735	88.8448	-0.0762178
13.3627	148.226	11.0354	-0.946388	88.8415	-0.0761899
13.371	148.313	11.035	-0.946054	88.8382	-0.076163
13.3793	148.393	11.0345	-0.945723	88.8347	-0.0761363
13.3877	148.482	11.0341	-0.945371	88.8311	-0.076108
13.396	148.56	11.0336	-0.945064	88.8275	-0.0760833
13.4043	148.649	11.0333	-0.944718	88.8242	-0.0760554
13.4127	148.726	11.0328	-0.94437	88.821	-0.0760274
13.421	148.821	11.0325	-0.944047	88.8178	-0.0760014
13.4293	148.895	11.032	-0.943724	88.8146	-0.0759754
13.4377	148.981	11.0316	-0.943393	88.8112	-0.0759488
13.446	149.065	11.0312	-0.943054	88.808	-0.0759215
13.4543	149.149	11.0308	-0.942744	88.8047	-0.0758965
13.4627	149.225	11.0304	-0.942438	88.8016	-0.0758719
13.471	149.315	11.0301	-0.942152	88.7986	-0.0758489
13.4793	149.399	11.0297	-0.941793	88.7956	-0.07582
13.4877	149.484	11.0293	-0.941436	88.7923	-0.0757912
13.496	149.568	11.0289	-0.941096	88.7892	-0.0757638
13.5043	149.651	11.0285	-0.940761	88.7863	-0.0757368
13.5127	149.733	11.0282	-0.940405	88.7833	-0.0757082
13.521	149.819	11.0278	-0.940036	88.7802	-0.0756785
13.5293	149.903	11.0274	-0.939716	88.7771	-0.0756528
13.5377	149.987	11.027	-0.939313	88.774	-0.0756203
13.546	150.072	11.0266	-0.93891	88.7709	-0.0755879
13.5543	150.157	11.0263	-0.938495	88.768	-0.0755544
13.5627	150.236	11.0259	-0.938092	88.7649	-0.075522
13.571	150.327	11.0255	-0.937688	88.7619	-0.0754894
13.5793	150.403	11.0251	-0.937297	88.7588	-0.075458
13.5877	150.492	11.0247	-0.936887	88.7557	-0.075425
13.596	150.573	11.0243	-0.936494	88.7524	-0.0753933
13.6043	150.659	11.0239	-0.936106	88.7491	-0.0753621
13.6127	150.741	11.0235	-0.935676	88.7459	-0.0753275
13.621	150.826	11.0231	-0.935303	88.7428	-0.0752975
13.6293	150.906	11.0227	-0.934911	88.7395	-0.0752659
13.6377	150.996	11.0223	-0.93451	88.736	-0.0752336
13.646	151.077	11.0219	-0.934125	88.7329	-0.0752026
13.6543	151.161	11.0215	-0.93372	88.7296	-0.07517
13.6627	151.243	11.0211	-0.933297	88.7265	-0.075136
13.671	151.327	11.0207	-0.932875	88.723	-0.075102
13.6793	151.412	11.0203	-0.932462	88.7197	-0.0750688
13.6877	151.492	11.0199	-0.932044	88.7164	-0.0750351
13.696	151.577	11.0195	-0.931615	88.7132	-0.0750006
13.7043	151.664	11.0191	-0.931168	88.7102	-0.0749646
13.7127	151.745	11.0187	-0.930733	88.7073	-0.0749295
13.721	151.833	11.0184	-0.930315	88.7045	-0.0748959
13.7293	151.911	11.018	-0.929895	88.7017	-0.0748621
13.7377	152.004	11.0177	-0.929477	88.6988	-0.0748284
13.746	152.083	11.0173	-0.929057	88.6959	-0.0747946
13.7543	152.169	11.0169	-0.928626	88.6929	-0.0747599
13.7627	152.25	11.0166	-0.928164	88.6902	-0.0747228
13.771	152.336	11.0163	-0.927715	88.6875	-0.0746866
13.7793	152.421	11.0159	-0.927279	88.6845	-0.0746515
13.7877	152.503	11.0155	-0.926854	88.6814	-0.0746173
13.796	152.589	11.0151	-0.926419	88.6784	-0.0745822
13.8043	152.672	11.0147	-0.925953	88.6752	-0.0745447
13.8127	152.755	11.0144	-0.925483	88.6722	-0.0745069
13.821	152.841	11.014	-0.925022	88.669	-0.0744698
13.8293	152.922	11.0136	-0.924533	88.666	-0.0744304
13.8377	153.007	11.0132	-0.924052	88.6632	-0.0743917
13.846	153.091	11.0128	-0.923605	88.6598	-0.0743557
13.8543	153.174	11.0124	-0.923134	88.6568	-0.0743178
13.8627	153.258	11.0121	-0.922645	88.6541	-0.0742784
13.871	153.344	11.0118	-0.92213	88.6512	-0.074237
13.8793	153.43	11.0114	-0.921613	88.6483	-0.0741954
13.8877	153.514	11.0111	-0.921148	88.6456	-0.0741579
13.896	153.597	11.0107	-0.920686	88.6426	-0.0741207
13.9043	153.679	11.0103	-0.920218	88.6398	-0.074083
13.9127	153.762	11.01	-0.919754	88.6371	-0.0740457
13.921	153.85	11.0096	-0.919274	88.6342	-0.0740071
13.9293	153.932	11.0093	-0.918751	88.6316	-0.0739649
13.9377	154.016	11.009	-0.918258	88.6287	-0.0739253
13.946	154.101	11.0086	-0.91774	88.6259	-0.0738835
13.9543	154.187	11.0083	-0.917237	88.6231	-0.073843
13.9627	154.27	11.0079	-0.91677	88.6202	-0.0738054
13.971	154.351	11.0075	-0.916259	88.6173	-0.0737643
13.9793	154.436	11.0071	-0.915732	88.6141	-0.0737219
13.9877	154.523	11.0068	-0.915208	88.611	-0.0736797
13.996	154.602	11.0064	-0.914695	88.6079	-0.0736384
14.0043	154.687	11.006	-0.914171	88.6051	-0.0735962
14.0127	154.771	11.0057	-0.913665	88.6024	-0.0735555
14.021	154.853	11.0053	-0.913159	88.5996	-0.0735147
14.0293	154.94	11.005	-0.912671	88.5967	-0.0734755
14.0377	155.021	11.0046	-0.912182	88.5937	-0.0734361
14.046	155.107	11.0043	-0.911687	88.5908	-0.0733962
14.0543	155.187	11.0039	-0.911186	88.588	-0.0733559
14.0627	155.276	11.0036	-0.910667	88.5857	-0.0733141
14.071	155.359	11.0033	-0.910188	88.5833	-0.0732756
14.0793	155.444	11.003	-0.909686	88.5809	-0.0732352
14.0877	155.526	11.0027	-0.909196	88.5781	-0.0731957
14.096	155.609	11.0023	-0.908711	88.5753	-0.0731567
14.1043	155.694	11.002	-0.90819	88.5723	-0.0731147
14.1127	155.78	11.0016	-0.90768	88.5695	-0.0730736
14.121	155.864	11.0013	-0.907172	88.5668	-0.0730328
14.1293	155.945	11.001	-0.906649	88.5643	-0.0729907
14.1377	156.032	11.0006	-0.906128	88.5616	-0.0729487
14.146	156.116	11.0002	-0.905641	88.5585	-0.0729095
14.1543	156.199	10.9999	-0.905126	88.5555	-0.072868
14.1627	156.281	10.9995	-0.904599	88.5526	-0.0728256
14.171	156.369	10.9992	-0.904085	88.5498	-0.0727842
14.1793	156.449	10.9988	-0.903585	88.5471	-0.072744
14.1877	156.532	10.9985	-0.903084	88.5445	-0.0727036
14.196	156.617	10.9982	-0.902582	88.5419	-0.0726633
14.2043	156.7	10.9978	-0.902076	88.5392	-0.0726225
14.2127	156.786	10.9975	-0.901561	88.5364	-0.0725811
14.221	156.869	10.9972	-0.901038	88.5339	-0.0725389
14.2293	156.952	10.9969	-0.900486	88.5312	-0.0724945
14.2377	157.038	10.9965	-0.899945	88.5285	-0.0724509
14.246	157.125	10.9962	-0.899426	88.5257	-0.0724091
14.2543	157.208	10.9958	-0.898919	88.5228	-0.0723683
14.2627	157.292	10.9955	-0.898374	88.5201	-0.0723245
14.271	157.374	10.9951	-0.897844	88.5174	-0.0722818
14.2793	157.456	10.9948	-0.897317	88.5147	-0.0722394
14.2877	157.546	10.9945	-0.896819	88.512	-0.0721993
14.296	157.625	10.9941	-0.896324	88.5091	-0.0721594
14.3043	157.712	10.9938	-0.895821	88.5063	-0.0721189
14.3127	157.792	10.9934	-0.895351	88.5036	-0.0720811
14.321	157.878	10.9931	-0.894859	88.5009	-0.0720414
14.3293	157.96	10.9928	-0.89437	88.4984	-0.0720021
14.3377	158.047	10.9925	-0.893834	88.4959	-0.0719589
14.346	158.128	10.9921	-0.893306	88.4931	-0.0719165
14.3543	158.215	10.9918	-0.892816	88.4904	-0.071877
14.3627	158.296	10.9915	-0.892317	88.4877	-0.0718369
14.371	158.381	10.9911	-0.891808	88.4853	-0.0717958
14.3793	158.469	10.9908	-0.891261	88.4825	-0.0717518
14.3877	158.547	10.9905	-0.890776	88.4798	-0.0717128
14.396	158.634	10.9901	-0.890261	88.477	-0.0716713
14.4043	158.715	10.9898	-0.889744	88.474	-0.0716297
14.4127	158.802	10.9894	-0.889218	88.4713	-0.0715873
14.421	158.883	10.9891	-0.888706	88.4687	-0.0715461
14.4293	158.968	10.9888	-0.888225	88.4662	-0.0715074
14.4377	159.049	10.9885	-0.887704	88.4637	-0.0714655
14.446	159.133	10.9881	-0.887184	88.4608	-0.0714236
14.4543	159.216	10.9878	-0.886651	88.4581	-0.0713807
14.4627	159.302	10.9875	-0.886171	88.4556	-0.0713421
14.471	159.386	10.9871	-0.885656	88.4531	-0.0713006
14.4793	159.47	10.9868	-0.88513	88.4505	-0.0712583
14.4877	159.558	10.9865	-0.884625	88.448	-0.0712176
14.496	159.639	10.9862	-0.884126	88.4454	-0.0711774
14.5043	159.72	10.9859	-0.883621	88.4427	-0.0711368
14.5127	159.805	10.9855	-0.883122	88.4401	-0.0710966
14.521	159.888	10.9853	-0.882663	88.4378	-0.0710597
14.5293	159.972	10.9849	-0.882174	88.4354	-0.0710202
14.5377	160.056	10.9846	-0.881701	88.4328	-0.0709822
14.546	160.143	10.9843	-0.881221	88.4302	-0.0709435
14.5543	160.222	10.984	-0.880733	88.4278	-0.0709042
14.5627	160.31	10.9837	-0.880267	88.4254	-0.0708667
14.571	160.392	10.9834	-0.879791	88.4228	-0.0708284
14.5793	160.475	10.9831	-0.879309	88.4203	-0.0707896
14.5877	160.555	10.9828	-0.878834	88.4179	-0.0707514
14.596	160.644	10.9825	-0.878368	88.4154	-0.0707139
14.6043	160.727	10.9821	-0.877888	88.4125	-0.0706752
14.6127	160.811	10.9818	-0.877432	88.4099	-0.0706385
14.621	160.896	10.9815	-0.876963	88.4075	-0.0706008
14.6293	160.981	10.9812	-0.876469	88.4049	-0.0705609
14.6377	161.064	10.9808	-0.875998	88.4022	-0.0705231
14.646	161.145	10.9805	-0.875535	88.3995	-0.0704858
14.6543	161.229	10.9802	-0.87507	88.397	-0.0704484
14.6627	161.313	10.9799	-0.874624	88.3944	-0.0704125
14.671	161.395	10.9796	-0.874182	88.392	-0.0703768
14.6793	161.478	10.9793	-0.873711	88.3897	-0.070339
14.6877	161.57	10.979	-0.873251	88.3873	-0.0703019
14.696	161.65	10.9787	-0.872807	88.385	-0.0702662
14.7043	161.732	10.9784	-0.872352	88.3824	-0.0702295
14.7127	161.819	10.9781	-0.871882	88.3799	-0.0701917
14.721	161.901	10.9778	-0.871423	88.3775	-0.0701547
14.7293	161.985	10.9775	-0.870938	88.3753	-0.0701157
14.7377	162.071	10.9772	-0.87047	88.3728	-0.070078
14.746	162.156	10.9769	-0.870003	88.3703	-0.0700404
14.7543	162.239	10.9766	-0.86955	88.3679	-0.0700039
14.7627	162.321	10.9762	-0.869061	88.3651	-0.0699646
14.771	162.403	10.9759	-0.868576	88.3626	-0.0699255
14.7793	162.488	10.9756	-0.868108	88.3601	-0.0698879
14.7877	162.572	10.9753	-0.867641	88.3578	-0.0698502
14.796	162.655	10.975	-0.867213	88.3555	-0.0698158
14.8043	162.738	10.9747	-0.866777	88.353	-0.0697807
14.8127	162.821	10.9744	-0.866332	88.3502	-0.0697449
14.821	162.906	10.974	-0.865847	88.3476	-0.0697058
14.8293	162.99	10.9737	-0.865377	88.345	-0.069668
14.8377	163.077	10.9734	-0.8649	88.3424	-0.0696296
14.846	163.16	10.9731	-0.864481	88.3402	-0.0695959
14.8543	163.243	10.9728	-0.864029	88.3377	-0.0695595
14.8627	163.33	10.9725	-0.863549	88.3352	-0.0695209
14.871	163.415	10.9722	-0.863074	88.3327	-0.0694826
14.8793	163.497	10.9719	-0.86261	88.33	-0.0694452
14.8877	163.581	10.9716	-0.862131	88.3276	-0.0694067
14.896	163.669	10.9713	-0.861667	88.3253	-0.0693693
14.9043	163.746	10.971	-0.861233	88.3228	-0.0693344
14.9127	163.832	10.9706	-0.860783	88.3202	-0.0692981
14.921	163.912	10.9703	-0.860342	88.3177	-0.0692626
14.9293	163.999	10.97	-0.859865	88.3149	-0.0692242
14.9377	164.082	10.9697	-0.859415	88.3124	-0.0691881
14.946	164.163	10.9694	-0.858989	88.31	-0.0691538
14.9543	164.25	10.9691	-0.858568	88.3076	-0.0691199
14.9627	164.333	10.9688	-0.858124	88.3051	-0.0690841
14.971	164.42	10.9685	-0.857635	88.3028	-0.0690447
14.9793	164.504	10.9682	-0.857194	88.3005	-0.0690092
14.9877	164.586	10.9679	-0.856747	88.2983	-0.0689733
14.996	164.671	10.9677	-0.856292	88.2962	-0.0689366
15.0043	164.756	10.9674	-0.855867	88.2939	-0.0689024
15.0127	164.838	10.9671	-0.855421	88.2918	-0.0688665
15.021	164.92	10.9668	-0.854967	88.2892	-0.06883
15.0293	165.005	10.9665	-0.854502	88.2866	-0.0687925
15.0377	165.093	10.9662	-0.854042	88.2842	-0.0687555
15.046	165.173	10.9659	-0.853601	88.2819	-0.06872
15.0543	165.262	10.9656	-0.853212	88.2795	-0.0686886
15.0627	165.344	10.9653	-0.852787	88.2771	-0.0686544
15.071	165.422	10.965	-0.852363	88.2746	-0.0686203
15.0793	165.51	10.9647	-0.851953	88.2724	-0.0685873
15.0877	165.593	10.9644	-0.851505	88.2701	-0.0685512
15.096	165.679	10.9641	-0.851071	88.2678	-0.0685163
15.1043	165.759	10.9638	-0.850632	88.2654	-0.0684809
15.1127	165.844	10.9635	-0.850198	88.263	-0.068446
15.121	165.926	10.9632	-0.84976	88.2605	-0.0684107
15.1293	166.006	10.9629	-0.849297	88.2582	-0.0683735
15.1377	166.097	10.9627	-0.848825	88.256	-0.0683355
15.146	166.179	10.9624	-0.848394	88.2537	-0.0683008
15.1543	166.265	10.9621	-0.84798	88.2514	-0.0682674
15.1627	166.349	10.9618	-0.847567	88.2488	-0.0682342
15.171	166.433	10.9614	-0.847151	88.246	-0.0682007
15.1793	166.517	10.9611	-0.846744	88.2437	-0.068168
15.1877	166.6	10.9609	-0.846342	88.2417	-0.0681356
15.196	166.682	10.9606	-0.845938	88.2393	-0.0681031
15.2043	166.767	10.9603	-0.845524	88.2371	-0.0680697
15.2127	166.849	10.96	-0.845158	88.2347	-0.0680402
15.221	166.937	10.9597	-0.844784	88.2322	-0.0680101
15.2293	167.02	10.9594	-0.844369	88.2299	-0.0679767
15.2377	167.106	10.9591	-0.843931	88.2275	-0.0679415
15.246	167.19	10.9588	-0.843482	88.225	-0.0679053
15.2543	167.274	10.9585	-0.843066	88.2228	-0.0678718
15.2627	167.355	10.9582	-0.842653	88.22	-0.0678386
15.271	167.442	10.9579	-0.842236	88.2175	-0.067805
15.2793	167.525	10.9576	-0.841819	88.2153	-0.0677715
15.2877	167.611	10.9573	-0.841428	88.213	-0.0677399
15.296	167.691	10.957	-0.841008	88.2107	-0.0677061
15.3043	167.775	10.9567	-0.840572	88.2083	-0.0676711
15.3127	167.86	10.9564	-0.840142	88.2059	-0.0676364
15.321	167.94	10.9562	-0.839753	88.2038	-0.0676051
15.3293	168.028	10.9559	-0.839337	88.2018	-0.0675716
15.3377	168.108	10.9557	-0.838893	88.1997	-0.0675359
15.346	168.191	10.9554	-0.838487	88.1977	-0.0675032
15.3543	168.278	10.9551	-0.8381	88.1954	-0.067472
15.3627	168.358	10.9548	-0.837702	88.1929	-0.06744
15.371	168.442	10.9545	-0.837295	88.1903	-0.0674073
15.3793	168.529	10.9542	-0.836857	88.1881	-0.067372
15.3877	168.615	10.9539	-0.836448	88.1857	-0.0673391
15.396	168.696	10.9537	-0.83607	88.1837	-0.0673086
15.4043	168.78	10.9534	-0.835662	88.1813	-0.0672757
15.4127	168.863	10.9531	-0.835284	88.1791	-0.0672453
15.421	168.946	10.9528	-0.834914	88.1768	-0.0672155
15.4293	169.032	10.9526	-0.834486	88.1746	-0.0671811
15.4377	169.113	10.9523	-0.834045	88.1726	-0.0671456
15.446	169.196	10.9521	-0.833619	88.1708	-0.0671113
15.4543	169.283	10.9518	-0.833188	88.1687	-0.0670766
15.4627	169.368	10.9515	-0.832816	88.1663	-0.0670467
15.471	169.452	10.9513	-0.832405	88.1642	-0.0670135
15.4793	169.534	10.951	-0.832001	88.1618	-0.066981
15.4877	169.619	10.9507	-0.831553	88.1596	-0.066945
15.496	169.703	10.9504	-0.831143	88.1572	-0.066912
15.5043	169.789	10.9501	-0.830731	88.1548	-0.0668788
15.5127	169.869	10.9498	-0.830359	88.1526	-0.0668488
15.521	169.954	10.9495	-0.829955	88.1502	-0.0668163
15.5293	170.036	10.9493	-0.829542	88.1481	-0.0667831
15.5377	170.12	10.949	-0.829138	88.146	-0.0667506
15.546	170.204	10.9487	-0.828724	88.1436	-0.0667173
15.5543	170.289	10.9484	-0.828372	88.1413	-0.0666889
15.5627	170.372	10.9481	-0.827974	88.1391	-0.0666568
15.571	170.456	10.9478	-0.827608	88.1365	-0.0666274
15.5793	170.54	10.9475	-0.827208	88.1343	-0.0665952
15.5877	170.626	10.9473	-0.826787	88.1321	-0.0665613
15.596	170.708	10.947	-0.826354	88.1296	-0.0665265
15.6043	170.791	10.9467	-0.825989	88.1274	-0.0664971
15.6127	170.878	10.9464	-0.82563	88.1252	-0.0664681
15.621	170.957	10.9461	-0.825269	88.123	-0.0664391
15.6293	171.04	10.9459	-0.824857	88.1209	-0.0664059
15.6377	171.127	10.9456	-0.824438	88.1186	-0.0663722
15.646	171.212	10.9453	-0.824053	88.1165	-0.0663412
15.6543	171.296	10.9451	-0.823648	88.1144	-0.0663086
15.6627	171.377	10.9448	-0.823234	88.1122	-0.0662753
15.671	171.46	10.9445	-0.822853	88.1101	-0.0662446
15.6793	171.547	10.9443	-0.822453	88.1078	-0.0662124
15.6877	171.628	10.944	-0.822054	88.1055	-0.0661802
15.696	171.714	10.9436	-0.821657	88.1029	-0.0661483
15.7043	171.795	10.9433	-0.821252	88.1004	-0.0661157
15.7127	171.878	10.943	-0.820874	88.0978	-0.0660852
15.721	171.961	10.9427	-0.820485	88.0954	-0.0660539
15.7293	172.047	10.9424	-0.820073	88.0932	-0.0660208
15.7377	172.132	10.9422	-0.819704	88.091	-0.0659911
15.746	172.219	10.9419	-0.819346	88.0886	-0.0659623
15.7543	172.301	10.9416	-0.818987	88.0864	-0.0659333
15.7627	172.384	10.9413	-0.818656	88.0844	-0.0659067
15.771	172.47	10.9411	-0.818272	88.0821	-0.0658757
15.7793	172.55	10.9408	-0.817888	88.08	-0.0658449
15.7877	172.633	10.9406	-0.817519	88.078	-0.0658151
15.796	172.717	10.9403	-0.817157	88.0763	-0.065786
15.8043	172.801	10.9401	-0.816792	88.0744	-0.0657566
15.8127	172.885	10.9398	-0.816443	88.0723	-0.0657286
15.821	172.969	10.9396	-0.816054	88.0704	-0.0656972
15.8293	173.057	10.9393	-0.815662	88.0681	-0.0656656
15.8377	173.137	10.9391	-0.815275	88.066	-0.0656345
15.846	173.221	10.9388	-0.81488	88.0637	-0.0656027
15.8543	173.305	10.9385	-0.814482	88.0615	-0.0655707
15.8627	173.386	10.9382	-0.814112	88.0594	-0.0655409
15.871	173.47	10.938	-0.813731	88.057	-0.0655102
15.8793	173.553	10.9377	-0.813326	88.0548	-0.0654776
15.8877	173.639	10.9374	-0.812957	88.0528	-0.0654479
15.896	173.721	10.9372	-0.812573	88.0506	-0.065417
15.9043	173.808	10.9369	-0.812215	88.0483	-0.0653882
15.9127	173.889	10.9367	-0.811849	88.0466	-0.0653587
15.921	173.972	10.9364	-0.811484	88.0444	-0.0653293
15.9293	174.059	10.9361	-0.811112	88.0423	-0.0652994
15.9377	174.137	10.9359	-0.810779	88.0404	-0.0652726
15.946	174.222	10.9357	-0.810406	88.0387	-0.0652425
15.9543	174.306	10.9354	-0.810048	88.0369	-0.0652137
15.9627	174.394	10.9352	-0.809722	88.0346	-0.0651875
15.971	174.473	10.9349	-0.809354	88.0325	-0.0651578
15.9793	174.556	10.9346	-0.808997	88.0305	-0.0651291
15.9877	174.643	10.9344	-0.808676	88.0284	-0.0651032
15.996	174.728	10.9341	-0.808322	88.026	-0.0650748
16.0043	174.811	10.9338	-0.807948	88.0239	-0.0650447
16.0127	174.892	10.9336	-0.807596	88.0217	-0.0650163
16.021	174.98	10.9333	-0.807216	88.0196	-0.0649857
16.0293	175.063	10.933	-0.806859	88.0171	-0.0649569
16.0377	175.142	10.9327	-0.806492	88.0147	-0.0649274
16.046	175.231	10.9324	-0.806099	88.0123	-0.0648958
16.0543	175.311	10.9321	-0.80572	88.0101	-0.0648653
16.0627	175.396	10.9319	-0.805362	88.008	-0.0648365
16.071	175.476	10.9316	-0.80497	88.0058	-0.0648049
16.0793	175.562	10.9313	-0.804591	88.0036	-0.0647743
16.0877	175.649	10.9311	-0.804248	88.0015	-0.0647468
16.096	175.732	10.9308	-0.803873	87.9994	-0.0647166
16.1043	175.817	10.9305	-0.803538	87.9972	-0.0646896
16.1127	175.899	10.9302	-0.803185	87.995	-0.0646612
16.121	175.981	10.93	-0.802836	87.9927	-0.0646331
16.1293	176.065	10.9297	-0.802514	87.9908	-0.0646072
16.1377	176.148	10.9295	-0.802165	87.9887	-0.064579
16.146	176.23	10.9292	-0.801798	87.9865	-0.0645496
16.1543	176.317	10.9289	-0.801428	87.9842	-0.0645197
16.1627	176.4	10.9287	-0.801095	87.9823	-0.0644929
16.171	176.483	10.9284	-0.800749	87.9801	-0.0644651
16.1793	176.57	10.9281	-0.800418	87.978	-0.0644384
16.1877	176.65	10.9279	-0.800057	87.9758	-0.0644093
16.196	176.738	10.9276	-0.799692	87.9739	-0.06438
16.2043	176.819	10.9274	-0.799327	87.9722	-0.0643506
16.2127	176.903	10.9272	-0.798962	87.9702	-0.0643212
16.221	176.987	10.9269	-0.798616	87.9682	-0.0642934
16.2293	177.071	10.9267	-0.798242	87.9661	-0.0642633
16.2377	177.156	10.9264	-0.797921	87.964	-0.0642374
16.246	177.239	10.9261	-0.797584	87.9618	-0.0642103
16.2543	177.322	10.9259	-0.797227	87.9599	-0.0641816
16.2627	177.406	10.9256	-0.79689	87.9578	-0.0641544
16.271	177.493	10.9254	-0.796555	87.9557	-0.0641274
16.2793	177.574	10.9251	-0.79619	87.9539	-0.064098
16.2877	177.659	10.9249	-0.795836	87.9517	-0.0640695
16.296	177.742	10.9246	-0.795485	87.9496	-0.0640413
16.3043	177.824	10.9244	-0.795144	87.9476	-0.0640138
16.3127	177.909	10.9241	-0.794828	87.9458	-0.0639884
16.321	177.99	10.9239	-0.794461	87.9439	-0.0639588
16.3293	178.075	10.9237	-0.794101	87.942	-0.0639299
16.3377	178.159	10.9234	-0.793744	87.94	-0.0639012
16.346	178.243	10.9232	-0.793413	87.9382	-0.0638745
16.3543	178.328	10.923	-0.793081	87.9364	-0.0638478
16.3627	178.41	10.9227	-0.792786	87.9342	-0.063824
16.371	178.493	10.9225	-0.792485	87.9325	-0.0637998
16.3793	178.579	10.9222	-0.792151	87.9302	-0.0637729
16.3877	178.663	10.9219	-0.791817	87.928	-0.063746
16.396	178.746	10.9216	-0.791454	87.9258	-0.0637168
16.4043	178.833	10.9214	-0.791114	87.9235	-0.0636894
16.4127	178.915	10.9211	-0.790752	87.9215	-0.0636603
16.421	178.998	10.9208	-0.7904	87.9194	-0.0636319
16.4293	179.082	10.9206	-0.790036	87.9172	-0.0636026
16.4377	179.164	10.9203	-0.789686	87.915	-0.0635744
16.446	179.25	10.9201	-0.789319	87.9131	-0.0635449
16.4543	179.335	10.9198	-0.788939	87.911	-0.0635143
16.4627	179.416	10.9196	-0.788567	87.9091	-0.0634843
16.471	179.501	10.9193	-0.788216	87.9071	-0.0634561
16.4793	179.59	10.9191	-0.78788	87.9053	-0.063429
16.4877	179.671	10.9189	-0.787523	87.9033	-0.0634003
16.496	179.754	10.9186	-0.787201	87.9011	-0.0633744
16.5043	179.837	10.9183	-0.78686	87.899	-0.0633469
16.5127	179.921	10.9181	-0.786521	87.897	-0.0633196
16.521	180.004	10.9178	-0.786172	87.895	-0.0632916
16.5293	180.085	10.9176	-0.785848	87.893	-0.0632655
16.5377	180.169	10.9173	-0.785527	87.8911	-0.0632396
16.546	180.251	10.9171	-0.785238	87.8892	-0.0632163
16.5543	180.336	10.9169	-0.784898	87.8874	-0.063189
16.5627	180.423	10.9166	-0.784582	87.8854	-0.0631635
16.571	180.509	10.9164	-0.784288	87.8835	-0.0631398
16.5793	180.592	10.9162	-0.783995	87.8818	-0.0631163
16.5877	180.675	10.916	-0.783697	87.8801	-0.0630923
16.596	180.759	10.9158	-0.783394	87.8784	-0.0630679
16.6043	180.841	10.9155	-0.783074	87.8764	-0.0630421
16.6127	180.922	10.9152	-0.782754	87.8742	-0.0630164
16.621	181.01	10.915	-0.782415	87.8722	-0.062989
16.6293	181.094	10.9147	-0.782088	87.87	-0.0629627
16.6377	181.174	10.9145	-0.781808	87.8678	-0.0629402
16.646	181.261	10.9142	-0.781489	87.8657	-0.0629146
[truncated: 9,868 more rows]
