# Supplementary material for: Comparative study on mechanisms for improving mechanical properties and microstructure of cement paste modified by different types of nanomaterials
Source: publisher site journal article supplement (doi:10.1515/ntrev-2021-0027), 2021-01-01
Supplement: Supplementary file 13 [file NS-6-1d.xlsx]

## Sheet: Sheet1
Time (min)	Temperature (°C)	Weight (mg)			Temperature Difference (°C/mg)
0.00126667	18.7224	13.9857	-0.877073	100	-0.0627121
0.00433333	18.7271	13.9852	-0.87658	99.9961	-0.0626769
0.0126667	18.7247	13.9845	-0.876535	99.9917	-0.0626737
0.021	18.7289	13.9839	-0.876462	99.9873	-0.0626684
0.0293333	18.7326	13.9833	-0.87637	99.9828	-0.0626619
0.0376667	18.7344	13.9827	-0.876266	99.9783	-0.0626544
0.046	18.7403	13.982	-0.876137	99.9738	-0.0626452
0.0543333	18.7339	13.9813	-0.876033	99.9688	-0.0626378
0.0626667	18.7399	13.9806	-0.875909	99.9636	-0.0626289
0.071	18.7394	13.9799	-0.87574	99.9585	-0.0626168
0.0793333	18.743	13.9792	-0.875562	99.9532	-0.0626041
0.0876667	18.7442	13.9785	-0.875378	99.9484	-0.062591
0.096	18.7459	13.9779	-0.875204	99.9439	-0.0625785
0.104333	18.7534	13.9772	-0.875074	99.939	-0.0625692
0.112667	18.752	13.9765	-0.874968	99.9341	-0.0625616
0.121	18.7531	13.9758	-0.874857	99.9292	-0.0625537
0.129333	18.7614	13.9751	-0.874782	99.9244	-0.0625483
0.137667	18.7626	13.9745	-0.874646	99.9197	-0.0625386
0.146	18.759	13.9739	-0.874575	99.9153	-0.0625335
0.154333	18.7696	13.9732	-0.874536	99.9107	-0.0625307
0.162667	18.7689	13.9726	-0.874511	99.9061	-0.0625289
0.171	18.7712	13.9719	-0.874481	99.9013	-0.0625268
0.179333	18.7697	13.9712	-0.874501	99.8965	-0.0625282
0.187667	18.7853	13.9705	-0.874481	99.8915	-0.0625268
0.196	18.7803	13.9698	-0.874504	99.8867	-0.0625284
0.204333	18.7894	13.9692	-0.874514	99.8819	-0.0625291
0.212667	18.7931	13.9685	-0.874526	99.8771	-0.06253
0.221	18.7919	13.9679	-0.874534	99.8724	-0.0625306
0.229333	18.796	13.9672	-0.874549	99.8676	-0.0625317
0.237667	18.7984	13.9665	-0.874617	99.8628	-0.0625365
0.246	18.8014	13.9658	-0.874689	99.858	-0.0625417
0.254333	18.809	13.9652	-0.874797	99.8532	-0.0625494
0.262667	18.8051	13.9644	-0.874906	99.8481	-0.0625572
0.271	18.8172	13.9638	-0.875074	99.8431	-0.0625692
0.279333	18.8225	13.963	-0.875207	99.838	-0.0625787
0.287667	18.8293	13.9623	-0.875372	99.8329	-0.0625905
0.296	18.8302	13.9616	-0.87557	99.8278	-0.0626047
0.304333	18.8426	13.9609	-0.875829	99.8227	-0.0626231
0.312667	18.8526	13.9602	-0.876096	99.818	-0.0626423
0.321	18.8561	13.9596	-0.876346	99.813	-0.0626602
0.329333	18.855	13.9588	-0.876623	99.808	-0.06268
0.337667	18.8729	13.9581	-0.876931	99.8029	-0.062702
0.346	18.8746	13.9574	-0.877239	99.798	-0.062724
0.354333	18.8813	13.9567	-0.877555	99.793	-0.0627466
0.362667	18.8978	13.9561	-0.877939	99.7881	-0.0627741
0.371	18.9034	13.9553	-0.878352	99.783	-0.0628036
0.379333	18.9049	13.9546	-0.878801	99.7779	-0.0628357
0.387667	18.9153	13.9539	-0.879277	99.7729	-0.0628697
0.396	18.9266	13.9532	-0.879714	99.7678	-0.062901
0.404333	18.942	13.9525	-0.880212	99.7629	-0.0629365
0.412667	18.9542	13.9518	-0.880731	99.7579	-0.0629737
0.421	18.9628	13.9512	-0.88122	99.753	-0.0630086
0.429333	18.9747	13.9505	-0.881771	99.7481	-0.0630481
0.437667	18.9905	13.9498	-0.882346	99.7432	-0.0630892
0.446	19.0058	13.9491	-0.882926	99.7384	-0.0631306
0.454333	19.0183	13.9485	-0.88355	99.7337	-0.0631753
0.462667	19.0372	13.9478	-0.88414	99.7289	-0.0632174
0.471	19.0478	13.9471	-0.8848	99.7239	-0.0632646
0.479333	19.065	13.9464	-0.885534	99.7189	-0.0633171
0.487667	19.0781	13.9457	-0.886252	99.7138	-0.0633685
0.496	19.0967	13.945	-0.887027	99.7087	-0.0634238
0.504333	19.1082	13.9443	-0.88786	99.7037	-0.0634834
0.512667	19.1326	13.9436	-0.888682	99.6987	-0.0635422
0.521	19.1522	13.9429	-0.889548	99.6937	-0.0636041
0.529333	19.1681	13.9421	-0.890416	99.6885	-0.0636661
0.537667	19.1945	13.9414	-0.891289	99.6835	-0.0637286
0.546	19.2078	13.9407	-0.8922	99.6785	-0.0637937
0.554333	19.2277	13.94	-0.893141	99.6733	-0.063861
0.562667	19.2563	13.9393	-0.89407	99.6683	-0.0639274
0.571	19.2725	13.9386	-0.895029	99.6633	-0.063996
0.579333	19.294	13.9379	-0.895991	99.6582	-0.0640648
0.587667	19.3149	13.9372	-0.897017	99.653	-0.0641382
0.596	19.3433	13.9365	-0.898077	99.6479	-0.0642139
0.604333	19.366	13.9357	-0.899123	99.6426	-0.0642888
0.612667	19.3907	13.935	-0.900231	99.6374	-0.064368
0.621	19.4136	13.9343	-0.901352	99.6323	-0.0644481
0.629333	19.442	13.9336	-0.902545	99.6274	-0.0645334
0.637667	19.473	13.9329	-0.903693	99.6222	-0.0646155
0.646	19.4999	13.9321	-0.904879	99.6168	-0.0647003
0.654333	19.5314	13.9314	-0.906099	99.6115	-0.0647875
0.662667	19.5612	13.9306	-0.907322	99.6063	-0.064875
0.671	19.5879	13.9299	-0.908556	99.6012	-0.0649632
0.679333	19.6212	13.9292	-0.909787	99.5961	-0.0650512
0.687667	19.6454	13.9285	-0.911054	99.5912	-0.0651418
0.696	19.6796	13.9278	-0.91234	99.586	-0.0652338
0.704333	19.7114	13.927	-0.913647	99.5806	-0.0653273
0.712667	19.742	13.9263	-0.914956	99.5752	-0.0654208
0.721	19.7851	13.9256	-0.916304	99.57	-0.0655172
0.729333	19.8207	13.9248	-0.917626	99.5648	-0.0656118
0.737667	19.8548	13.9241	-0.918963	99.5596	-0.0657073
0.746	19.889	13.9234	-0.920371	99.5544	-0.065808
0.754333	19.9303	13.9226	-0.921802	99.5488	-0.0659103
0.762667	19.9689	13.9218	-0.923243	99.5431	-0.0660134
0.771	20.007	13.921	-0.924665	99.5375	-0.066115
0.779333	20.0442	13.9202	-0.926122	99.532	-0.0662192
0.787667	20.0878	13.9195	-0.927592	99.5264	-0.0663243
0.796	20.1239	13.9187	-0.929074	99.5209	-0.0664303
0.804333	20.1693	13.9179	-0.930577	99.5153	-0.0665378
0.812667	20.212	13.9171	-0.932151	99.5096	-0.0666503
0.821	20.2571	13.9163	-0.933733	99.5041	-0.0667634
0.829333	20.3016	13.9155	-0.935303	99.4983	-0.0668757
0.837667	20.3423	13.9147	-0.936884	99.4927	-0.0669887
0.846	20.3985	13.9139	-0.938534	99.487	-0.0671067
0.854333	20.4339	13.9131	-0.94021	99.4812	-0.0672265
0.862667	20.4862	13.9123	-0.941872	99.4755	-0.0673454
0.871	20.527	13.9116	-0.943576	99.4698	-0.0674672
0.879333	20.5764	13.9108	-0.945284	99.4642	-0.0675893
0.887667	20.6245	13.91	-0.947026	99.4587	-0.0677139
0.896	20.6735	13.9092	-0.948742	99.4529	-0.0678366
0.904333	20.7228	13.9084	-0.950479	99.4473	-0.0679608
0.912667	20.7806	13.9076	-0.952236	99.4416	-0.0680864
0.921	20.8319	13.9068	-0.953946	99.436	-0.0682087
0.929333	20.8847	13.9061	-0.955642	99.4305	-0.0683299
0.937667	20.9336	13.9053	-0.957412	99.4248	-0.0684565
0.946	20.9925	13.9045	-0.959159	99.419	-0.0685814
0.954333	21.0394	13.9037	-0.960919	99.4133	-0.0687072
0.962667	21.0955	13.9028	-0.962704	99.4075	-0.0688349
0.971	21.1575	13.902	-0.964532	99.4016	-0.0689656
0.979333	21.2072	13.9012	-0.966404	99.3957	-0.0690995
0.987667	21.2673	13.9004	-0.968266	99.3899	-0.0692326
0.996	21.327	13.8995	-0.970163	99.384	-0.0693682
1.00433	21.3835	13.8987	-0.972097	99.378	-0.0695065
1.01267	21.4417	13.8979	-0.97403	99.3721	-0.0696447
1.021	21.498	13.8971	-0.975947	99.3662	-0.0697818
1.02933	21.5578	13.8962	-0.977927	99.3603	-0.0699233
1.03767	21.6214	13.8954	-0.979922	99.3543	-0.070066
1.046	21.6846	13.8946	-0.981945	99.3483	-0.0702106
1.05433	21.7431	13.8937	-0.983955	99.342	-0.0703544
1.06267	21.8086	13.8928	-0.985987	99.3358	-0.0704996
1.071	21.8726	13.8919	-0.988015	99.3295	-0.0706447
1.07933	21.9351	13.8911	-0.990003	99.3233	-0.0707868
1.08767	22.0027	13.8902	-0.992056	99.3173	-0.0709336
1.096	22.0685	13.8893	-0.994145	99.311	-0.071083
1.10433	22.1345	13.8885	-0.996216	99.3049	-0.071231
1.11267	22.1978	13.8876	-0.998311	99.2986	-0.0713809
1.121	22.2706	13.8867	-1.00038	99.2923	-0.0715289
1.12933	22.3368	13.8858	-1.00249	99.2859	-0.0716794
1.13767	22.4062	13.885	-1.0046	99.2797	-0.0718307
1.146	22.4778	13.8841	-1.00671	99.2738	-0.0719814
1.15433	22.5437	13.8833	-1.0089	99.2675	-0.0721378
1.16267	22.6167	13.8824	-1.01111	99.2613	-0.0722958
1.171	22.6824	13.8815	-1.01329	99.255	-0.0724516
1.17933	22.7611	13.8806	-1.01543	99.2485	-0.072605
1.18767	22.8289	13.8797	-1.01765	99.2421	-0.0727633
1.196	22.9057	13.8788	-1.01985	99.2354	-0.0729211
1.20433	22.9828	13.8779	-1.02211	99.2291	-0.0730826
1.21267	23.048	13.877	-1.02433	99.2226	-0.0732412
1.221	23.1228	13.8761	-1.02654	99.2161	-0.0733995
1.22933	23.1995	13.8751	-1.0288	99.2093	-0.0735609
1.23767	23.2712	13.8742	-1.03107	99.2027	-0.0737233
1.246	23.3473	13.8733	-1.03335	99.196	-0.0738865
1.25433	23.4242	13.8723	-1.03569	99.1892	-0.0740533
1.26267	23.5061	13.8714	-1.03806	99.1827	-0.0742227
1.271	23.5833	13.8704	-1.0404	99.1758	-0.0743901
1.27933	23.6643	13.8695	-1.04275	99.169	-0.0745582
1.28767	23.7389	13.8685	-1.04511	99.1621	-0.0747271
1.296	23.8168	13.8675	-1.04752	99.1551	-0.0748992
1.30433	23.8935	13.8666	-1.04992	99.1483	-0.0750713
1.31267	23.974	13.8657	-1.05234	99.1416	-0.0752439
1.321	24.0534	13.8647	-1.0548	99.1348	-0.0754197
1.32933	24.1429	13.8637	-1.05721	99.1279	-0.0755924
1.33767	24.2189	13.8628	-1.05964	99.1211	-0.0757657
1.346	24.2997	13.8618	-1.06207	99.1141	-0.0759394
1.35433	24.3812	13.8608	-1.06453	99.1072	-0.0761153
1.36267	24.4637	13.8599	-1.06704	99.1004	-0.0762954
1.371	24.543	13.859	-1.06962	99.0938	-0.0764793
1.37933	24.6218	13.858	-1.07214	99.0869	-0.0766597
1.38767	24.7078	13.857	-1.07468	99.0798	-0.0768412
1.396	24.7914	13.856	-1.07725	99.0726	-0.0770248
1.40433	24.8787	13.855	-1.07978	99.0656	-0.0772063
1.41267	24.9572	13.854	-1.08238	99.0583	-0.0773918
1.421	25.0457	13.853	-1.08498	99.0511	-0.0775781
1.42933	25.1354	13.852	-1.08764	99.0438	-0.0777681
1.43767	25.2266	13.851	-1.0903	99.0366	-0.0779585
1.446	25.3104	13.8499	-1.09291	99.0291	-0.0781449
1.45433	25.3948	13.8488	-1.09549	99.0214	-0.0783295
1.46267	25.4787	13.8478	-1.09818	99.0139	-0.0785219
1.471	25.5751	13.8468	-1.10087	99.0065	-0.0787137
1.47933	25.6623	13.8457	-1.10353	98.9988	-0.0789039
1.48767	25.7476	13.8446	-1.10619	98.991	-0.0790943
1.496	25.828	13.8435	-1.1089	98.9834	-0.0792884
1.50433	25.9231	13.8424	-1.1116	98.9757	-0.0794815
1.51267	26.0077	13.8414	-1.11431	98.9681	-0.0796747
1.521	26.1029	13.8403	-1.11706	98.9606	-0.0798716
1.52933	26.1885	13.8393	-1.11981	98.9529	-0.0800679
1.53767	26.2854	13.8382	-1.12255	98.9454	-0.080264
1.546	26.3668	13.8371	-1.12528	98.9378	-0.0804593
1.55433	26.4594	13.8361	-1.12807	98.9301	-0.0806587
1.56267	26.5473	13.835	-1.13089	98.9225	-0.0808604
1.571	26.644	13.8339	-1.13372	98.9149	-0.0810631
1.57933	26.7406	13.8328	-1.13654	98.9069	-0.0812641
1.58767	26.8288	13.8317	-1.1394	98.8989	-0.0814687
1.596	26.9174	13.8305	-1.14226	98.8906	-0.0816731
1.60433	27.0101	13.8294	-1.14505	98.8823	-0.0818731
1.61267	27.099	13.8283	-1.14789	98.8743	-0.082076
1.621	27.1943	13.8271	-1.15075	98.8661	-0.0822808
1.62933	27.2889	13.826	-1.15362	98.8578	-0.0824858
1.63767	27.3846	13.8248	-1.15646	98.8497	-0.0826887
1.646	27.4826	13.8237	-1.15933	98.8415	-0.0828937
1.65433	27.5676	13.8225	-1.16221	98.8332	-0.0830996
1.66267	27.663	13.8214	-1.16509	98.8252	-0.0833057
1.671	27.7515	13.8202	-1.16796	98.817	-0.0835108
1.67933	27.8455	13.8191	-1.17088	98.809	-0.08372
1.68767	27.9422	13.818	-1.17386	98.8008	-0.0839325
1.696	28.0361	13.8168	-1.17682	98.7925	-0.0841442
1.70433	28.1382	13.8156	-1.17984	98.7841	-0.0843607
1.71267	28.2314	13.8145	-1.18284	98.7756	-0.084575
1.721	28.3271	13.8133	-1.18589	98.767	-0.084793
1.72933	28.4143	13.812	-1.1889	98.7584	-0.085008
1.73767	28.5178	13.8108	-1.19189	98.7496	-0.0852219
1.746	28.6096	13.8096	-1.19493	98.7407	-0.0854396
1.75433	28.7039	13.8084	-1.19793	98.732	-0.0856538
1.76267	28.8006	13.8071	-1.20095	98.7231	-0.0858696
1.771	28.8969	13.8059	-1.204	98.7141	-0.0860879
1.77933	28.9932	13.8046	-1.20704	98.7052	-0.086305
1.78767	29.0847	13.8034	-1.21002	98.6964	-0.0865184
1.796	29.1836	13.8021	-1.21303	98.6874	-0.0867335
1.80433	29.2767	13.8009	-1.21603	98.6785	-0.0869484
1.81267	29.3679	13.7996	-1.21909	98.6696	-0.0871667
1.821	29.4742	13.7984	-1.22219	98.6608	-0.0873885
1.82933	29.5687	13.7971	-1.22528	98.6518	-0.0876092
1.83767	29.6665	13.7959	-1.22841	98.6426	-0.0878336
1.846	29.76	13.7946	-1.23149	98.6336	-0.0880535
1.85433	29.8578	13.7933	-1.23457	98.6245	-0.0882737
1.86267	29.9562	13.792	-1.2377	98.6152	-0.0884976
1.871	30.0494	13.7907	-1.24082	98.606	-0.0887205
1.87933	30.1443	13.7894	-1.24396	98.5967	-0.0889452
1.88767	30.2454	13.7881	-1.24712	98.5874	-0.0891709
1.896	30.342	13.7868	-1.25026	98.5779	-0.0893956
1.90433	30.4299	13.7855	-1.2534	98.5684	-0.0896202
1.91267	30.532	13.7842	-1.25653	98.559	-0.0898438
1.921	30.6314	13.7828	-1.25968	98.5495	-0.0900691
1.92933	30.7282	13.7815	-1.26281	98.5399	-0.0902932
1.93767	30.8207	13.7802	-1.26594	98.5305	-0.0905169
1.946	30.9169	13.7788	-1.26907	98.5209	-0.0907409
1.95433	31.019	13.7775	-1.2723	98.5112	-0.0909715
1.96267	31.1102	13.7761	-1.27547	98.5013	-0.0911984
1.971	31.2054	13.7747	-1.27864	98.4912	-0.0914247
1.97933	31.3033	13.7733	-1.28185	98.4813	-0.091654
1.98767	31.4005	13.7719	-1.28504	98.4714	-0.0918827
1.996	31.4979	13.7706	-1.28822	98.4616	-0.0921095
2.00433	31.593	13.7692	-1.29138	98.4518	-0.0923359
2.01267	31.6874	13.7678	-1.29461	98.4418	-0.0925669
2.021	31.7863	13.7664	-1.29785	98.4317	-0.0927984
2.02933	31.8769	13.765	-1.3011	98.4218	-0.093031
2.03767	31.9845	13.7636	-1.30427	98.4119	-0.0932574
2.046	32.0741	13.7622	-1.30748	98.4019	-0.0934869
2.05433	32.1718	13.7608	-1.31069	98.3921	-0.0937166
2.06267	32.2709	13.7594	-1.31389	98.3821	-0.0939451
2.071	32.3665	13.758	-1.31708	98.3718	-0.0941734
2.07933	32.458	13.7565	-1.32034	98.3614	-0.0944063
2.08767	32.557	13.7551	-1.32361	98.351	-0.0946401
2.096	32.6548	13.7536	-1.3269	98.3407	-0.0948752
2.10433	32.7463	13.7522	-1.33021	98.3304	-0.0951124
2.11267	32.8454	13.7507	-1.33347	98.3199	-0.0953452
2.121	32.9388	13.7492	-1.33677	98.3092	-0.0955813
2.12933	33.0274	13.7478	-1.34006	98.2988	-0.0958163
2.13767	33.1328	13.7463	-1.34331	98.2882	-0.096049
2.146	33.2218	13.7448	-1.34654	98.2777	-0.0962797
2.15433	33.3175	13.7433	-1.34982	98.267	-0.0965146
2.16267	33.4138	13.7418	-1.35309	98.2564	-0.0967484
2.171	33.5102	13.7404	-1.35636	98.2458	-0.0969816
2.17933	33.6101	13.7388	-1.35963	98.235	-0.0972156
2.18767	33.7028	13.7373	-1.36285	98.224	-0.0974457
2.196	33.794	13.7358	-1.36614	98.2132	-0.0976809
2.20433	33.8941	13.7343	-1.36941	98.2022	-0.0979147
2.21267	33.9817	13.7327	-1.37268	98.1912	-0.0981488
2.221	34.0804	13.7312	-1.37602	98.1803	-0.0983877
2.22933	34.1751	13.7297	-1.37935	98.1693	-0.0986255
2.23767	34.2686	13.7281	-1.38263	98.1584	-0.0988606
2.246	34.3627	13.7266	-1.38593	98.1477	-0.0990959
2.25433	34.4544	13.7251	-1.38923	98.1365	-0.0993322
2.26267	34.55	13.7235	-1.39248	98.1254	-0.0995643
2.271	34.6479	13.722	-1.39576	98.1144	-0.0997992
2.27933	34.7416	13.7204	-1.39906	98.1031	-0.100035
2.28767	34.8313	13.7189	-1.40237	98.0921	-0.100272
2.296	34.9287	13.7173	-1.40566	98.0809	-0.100507
2.30433	35.0195	13.7157	-1.40892	98.0696	-0.10074
2.31267	35.1129	13.7141	-1.41221	98.0582	-0.100975
2.321	35.2064	13.7125	-1.41551	98.0466	-0.101211
2.32933	35.301	13.7109	-1.4188	98.0348	-0.101446
2.33767	35.3971	13.7093	-1.4221	98.0234	-0.101682
2.346	35.4871	13.7077	-1.42541	98.012	-0.101919
2.35433	35.5846	13.7061	-1.42869	98.0005	-0.102154
2.36267	35.6753	13.7045	-1.43195	97.9892	-0.102387
2.371	35.7709	13.7028	-1.43518	97.9776	-0.102618
2.37933	35.8596	13.7012	-1.43849	97.9656	-0.102855
2.38767	35.9511	13.6995	-1.44177	97.9539	-0.103089
2.396	36.0449	13.6979	-1.44506	97.9423	-0.103324
2.40433	36.1359	13.6963	-1.44834	97.9307	-0.103558
2.41267	36.2217	13.6947	-1.45169	97.9191	-0.103798
2.421	36.3164	13.693	-1.45501	97.9073	-0.104036
2.42933	36.407	13.6914	-1.45831	97.8954	-0.104272
2.43767	36.4993	13.6897	-1.46162	97.8834	-0.104508
2.446	36.5873	13.688	-1.46493	97.8711	-0.104745
2.45433	36.6765	13.6863	-1.46828	97.859	-0.104984
2.46267	36.7707	13.6846	-1.47155	97.8471	-0.105218
2.471	36.8619	13.6829	-1.47485	97.8351	-0.105454
2.47933	36.9497	13.6812	-1.47819	97.8229	-0.105693
2.48767	37.0409	13.6795	-1.48152	97.8105	-0.105931
2.496	37.1346	13.6777	-1.48477	97.798	-0.106164
2.50433	37.2231	13.676	-1.48805	97.7857	-0.106398
2.51267	37.3135	13.6743	-1.49136	97.7732	-0.106635
2.521	37.4039	13.6725	-1.4947	97.7609	-0.106873
2.52933	37.4978	13.6709	-1.498	97.7488	-0.107109
2.53767	37.5795	13.6691	-1.50129	97.7364	-0.107345
2.546	37.6752	13.6674	-1.5046	97.7238	-0.107582
2.55433	37.7589	13.6656	-1.50793	97.7112	-0.107819
2.56267	37.8487	13.6638	-1.51122	97.6985	-0.108054
2.571	37.9407	13.6621	-1.5145	97.6861	-0.108289
2.57933	38.0316	13.6603	-1.51775	97.6733	-0.108522
2.58767	38.1149	13.6585	-1.52099	97.6605	-0.108753
2.596	38.2121	13.6568	-1.52427	97.648	-0.108988
2.60433	38.2857	13.655	-1.52756	97.6353	-0.109223
2.61267	38.3789	13.6532	-1.53086	97.6225	-0.109459
2.621	38.467	13.6514	-1.53412	97.6098	-0.109692
2.62933	38.5591	13.6496	-1.53741	97.597	-0.109928
2.63767	38.6484	13.6478	-1.54067	97.5842	-0.110161
2.646	38.7268	13.6461	-1.54392	97.5715	-0.110393
2.65433	38.816	13.6443	-1.54718	97.5587	-0.110626
2.66267	38.9111	13.6425	-1.55048	97.5461	-0.110862
2.671	38.9957	13.6407	-1.5538	97.5334	-0.111099
2.67933	39.0841	13.6389	-1.55706	97.5203	-0.111332
2.68767	39.1644	13.6371	-1.5603	97.5071	-0.111564
2.696	39.2494	13.6352	-1.56355	97.4942	-0.111796
2.70433	39.3384	13.6334	-1.56686	97.4811	-0.112033
2.71267	39.4222	13.6316	-1.57016	97.4679	-0.112269
2.721	39.5132	13.6297	-1.57346	97.4548	-0.112505
2.72933	39.5994	13.6279	-1.57679	97.4415	-0.112743
2.73767	39.6852	13.626	-1.58008	97.4283	-0.112978
2.746	39.7655	13.6242	-1.58337	97.4151	-0.113214
2.75433	39.8511	13.6223	-1.58666	97.4016	-0.113449
2.76267	39.9406	13.6205	-1.58995	97.3885	-0.113684
2.771	40.0198	13.6186	-1.59323	97.3751	-0.113919
2.77933	40.1074	13.6167	-1.59653	97.3617	-0.114154
2.78767	40.1943	13.6148	-1.59981	97.3481	-0.114389
2.796	40.2724	13.6129	-1.60306	97.3348	-0.114622
2.80433	40.3624	13.6111	-1.60634	97.3213	-0.114856
2.81267	40.4476	13.6092	-1.6096	97.3078	-0.115089
2.821	40.5293	13.6073	-1.61288	97.2942	-0.115324
2.82933	40.6044	13.6054	-1.61618	97.2805	-0.11556
2.83767	40.6939	13.6035	-1.61947	97.267	-0.115795
2.846	40.7772	13.6016	-1.62278	97.2534	-0.116031
2.85433	40.8643	13.5996	-1.62609	97.2396	-0.116268
2.86267	40.9467	13.5977	-1.62939	97.2259	-0.116504
2.871	41.0316	13.5958	-1.63263	97.2122	-0.116736
2.87933	41.1131	13.5939	-1.63594	97.1983	-0.116972
2.88767	41.1979	13.5919	-1.63921	97.1844	-0.117206
2.896	41.2799	13.59	-1.64247	97.1705	-0.117439
2.90433	41.3586	13.588	-1.64575	97.1566	-0.117674
2.91267	41.4407	13.5861	-1.64899	97.1427	-0.117905
2.921	41.52	13.5841	-1.65222	97.1286	-0.118137
2.92933	41.6067	13.5821	-1.65544	97.1143	-0.118366
2.93767	41.6849	13.5802	-1.65867	97.1004	-0.118598
2.946	41.7662	13.5782	-1.6619	97.0864	-0.118829
2.95433	41.8536	13.5762	-1.66518	97.0723	-0.119063
2.96267	41.9312	13.5743	-1.66846	97.0582	-0.119297
2.971	42.016	13.5723	-1.67172	97.0442	-0.11953
2.97933	42.0943	13.5704	-1.67498	97.0303	-0.119763
2.98767	42.1783	13.5684	-1.67822	97.016	-0.119995
2.996	42.2607	13.5663	-1.68146	97.0016	-0.120227
3.00433	42.3362	13.5644	-1.68473	96.9874	-0.120461
3.01267	42.4143	13.5624	-1.68802	96.9732	-0.120696
3.021	42.4994	13.5603	-1.69126	96.9586	-0.120928
3.02933	42.5782	13.5583	-1.69452	96.944	-0.121161
3.03767	42.657	13.5563	-1.69774	96.9296	-0.121391
3.046	42.739	13.5543	-1.70096	96.9152	-0.121621
3.05433	42.824	13.5523	-1.70416	96.9008	-0.12185
3.06267	42.9046	13.5502	-1.70738	96.8863	-0.12208
3.071	42.9798	13.5482	-1.71062	96.8719	-0.122312
3.07933	43.0554	13.5462	-1.71384	96.8574	-0.122542
3.08767	43.1301	13.5442	-1.71708	96.8429	-0.122774
3.096	43.2179	13.5421	-1.7203	96.8284	-0.123004
3.10433	43.2954	13.5401	-1.72353	96.814	-0.123235
3.11267	43.3768	13.5381	-1.72675	96.7996	-0.123466
3.121	43.4557	13.536	-1.73002	96.7849	-0.123699
3.12933	43.5431	13.534	-1.73327	96.7699	-0.123931
3.13767	43.6184	13.5318	-1.7365	96.7548	-0.124163
3.146	43.691	13.5297	-1.7397	96.7397	-0.124392
3.15433	43.7715	13.5276	-1.7429	96.7246	-0.12462
3.16267	43.8518	13.5255	-1.74612	96.7096	-0.12485
3.171	43.9273	13.5234	-1.74932	96.6947	-0.125079
3.17933	44.0066	13.5214	-1.7525	96.6799	-0.125307
3.18767	44.0838	13.5192	-1.7557	96.6648	-0.125536
3.196	44.1625	13.5171	-1.75887	96.6496	-0.125762
3.20433	44.2399	13.515	-1.76197	96.6346	-0.125984
3.21267	44.32	13.5129	-1.7651	96.6196	-0.126208
3.221	44.3953	13.5109	-1.76828	96.6048	-0.126435
3.22933	44.4783	13.5088	-1.77146	96.5898	-0.126662
3.23767	44.5535	13.5067	-1.77465	96.5748	-0.12689
3.246	44.6275	13.5046	-1.77784	96.5597	-0.127119
3.25433	44.7075	13.5024	-1.78102	96.5443	-0.127346
3.26267	44.7861	13.5003	-1.78421	96.529	-0.127574
3.271	44.8633	13.4982	-1.78739	96.5139	-0.127801
3.27933	44.9353	13.4961	-1.79056	96.499	-0.128028
3.28767	45.0141	13.4939	-1.79374	96.4838	-0.128255
3.296	45.0894	13.4918	-1.7969	96.4685	-0.128482
3.30433	45.1695	13.4896	-1.80008	96.4532	-0.128708
3.31267	45.2441	13.4875	-1.80326	96.4379	-0.128936
3.321	45.3192	13.4854	-1.80642	96.4224	-0.129162
3.32933	45.3987	13.4832	-1.80953	96.4072	-0.129384
3.33767	45.4733	13.4811	-1.81265	96.3917	-0.129607
3.346	45.5486	13.4789	-1.81574	96.3762	-0.129829
3.35433	45.6333	13.4767	-1.81888	96.3607	-0.130053
3.36267	45.7041	13.4745	-1.82201	96.3451	-0.130277
3.371	45.7744	13.4724	-1.82516	96.3295	-0.130502
3.37933	45.8621	13.4702	-1.82827	96.3138	-0.130724
3.38767	45.9377	13.468	-1.8314	96.2981	-0.130948
3.396	46.0163	13.4658	-1.8345	96.2824	-0.131169
3.40433	46.0882	13.4636	-1.83759	96.2668	-0.131391
3.41267	46.1644	13.4614	-1.84071	96.251	-0.131614
3.421	46.2367	13.4592	-1.8438	96.2353	-0.131834
3.42933	46.3139	13.457	-1.8469	96.2196	-0.132056
3.43767	46.3826	13.4548	-1.84998	96.2043	-0.132277
3.446	46.4627	13.4526	-1.85304	96.1885	-0.132496
3.45433	46.5361	13.4504	-1.85611	96.1726	-0.132715
3.46267	46.6161	13.4482	-1.8592	96.1568	-0.132936
3.471	46.6881	13.446	-1.86224	96.1411	-0.133153
3.47933	46.7715	13.4438	-1.86528	96.1255	-0.13337
3.48767	46.8506	13.4416	-1.86829	96.1097	-0.133586
3.496	46.916	13.4394	-1.87128	96.0939	-0.133799
3.50433	46.9913	13.4372	-1.87427	96.078	-0.134014
3.51267	47.0687	13.435	-1.87725	96.062	-0.134227
3.521	47.1465	13.4327	-1.88023	96.0459	-0.134439
3.52933	47.2161	13.4305	-1.8832	96.0299	-0.134652
3.53767	47.2836	13.4282	-1.88615	96.0141	-0.134863
3.546	47.3658	13.426	-1.88908	95.9983	-0.135072
3.55433	47.4465	13.4238	-1.89197	95.9825	-0.135279
3.56267	47.5172	13.4215	-1.89489	95.9662	-0.135488
3.571	47.5903	13.4193	-1.89786	95.9501	-0.1357
3.57933	47.6653	13.4171	-1.90081	95.9341	-0.135911
3.58767	47.7359	13.4148	-1.90369	95.9183	-0.136117
3.596	47.8163	13.4126	-1.9066	95.9024	-0.136325
3.60433	47.8928	13.4104	-1.90951	95.8866	-0.136533
3.61267	47.9776	13.4082	-1.91237	95.8706	-0.136737
3.621	48.0429	13.4059	-1.9152	95.8545	-0.13694
3.62933	48.1158	13.4037	-1.91801	95.8384	-0.137141
3.63767	48.1911	13.4014	-1.92085	95.8222	-0.137344
3.646	48.2599	13.3992	-1.92364	95.8064	-0.137543
3.65433	48.3388	13.397	-1.92635	95.7906	-0.137737
3.66267	48.4143	13.3948	-1.92908	95.7746	-0.137933
3.671	48.4911	13.3925	-1.93183	95.7585	-0.138129
3.67933	48.5633	13.3903	-1.93456	95.7425	-0.138324
3.68767	48.6366	13.388	-1.93723	95.7263	-0.138515
3.696	48.7137	13.3858	-1.93992	95.7105	-0.138707
3.70433	48.7859	13.3836	-1.94259	95.6946	-0.138898
3.71267	48.8695	13.3813	-1.94524	95.6787	-0.139088
3.721	48.9395	13.3791	-1.94786	95.6629	-0.139275
3.72933	49.0177	13.3769	-1.95048	95.6469	-0.139463
3.73767	49.0894	13.3746	-1.95307	95.6308	-0.139648
3.746	49.1665	13.3724	-1.95559	95.6149	-0.139828
3.75433	49.2414	13.3702	-1.95815	95.5992	-0.140011
3.76267	49.311	13.368	-1.96066	95.5833	-0.140191
3.771	49.3914	13.3658	-1.96315	95.5677	-0.140369
3.77933	49.4631	13.3636	-1.9656	95.5517	-0.140543
3.78767	49.5377	13.3614	-1.96804	95.5359	-0.140718
3.796	49.6185	13.3591	-1.97044	95.5198	-0.14089
3.80433	49.6931	13.3569	-1.9728	95.5038	-0.141059
3.81267	49.7681	13.3547	-1.97509	95.4881	-0.141222
3.821	49.846	13.3525	-1.9774	95.4724	-0.141387
3.82933	49.9215	13.3503	-1.97973	95.4566	-0.141554
3.83767	49.996	13.3481	-1.98202	95.4408	-0.141718
3.846	50.0712	13.3458	-1.98423	95.4249	-0.141876
3.85433	50.1437	13.3436	-1.98641	95.409	-0.142031
3.86267	50.2165	13.3414	-1.98858	95.3932	-0.142187
3.871	50.3014	13.3392	-1.99073	95.3776	-0.14234
3.87933	50.3719	13.337	-1.99283	95.362	-0.14249
3.88767	50.451	13.3349	-1.99493	95.3464	-0.142641
3.896	50.5237	13.3327	-1.99704	95.3309	-0.142791
3.90433	50.5999	13.3305	-1.99907	95.3155	-0.142937
3.91267	50.6748	13.3284	-2.00104	95.3001	-0.143078
3.921	50.7476	13.3262	-2.00299	95.2845	-0.143217
3.92933	50.8261	13.324	-2.00493	95.2691	-0.143355
3.93767	50.9017	13.3219	-2.0068	95.2537	-0.14349
3.946	50.9783	13.3198	-2.00868	95.2384	-0.143624
3.95433	51.0531	13.3176	-2.01051	95.223	-0.143754
3.96267	51.1305	13.3155	-2.01233	95.2077	-0.143885
3.971	51.2073	13.3133	-2.01412	95.1924	-0.144013
3.97933	51.2797	13.3112	-2.01587	95.177	-0.144138
3.98767	51.3583	13.309	-2.01758	95.1616	-0.14426
3.996	51.432	13.3069	-2.01929	95.1462	-0.144382
4.00433	51.5102	13.3047	-2.02092	95.131	-0.144499
4.01267	51.5809	13.3026	-2.02256	95.116	-0.144616
4.021	51.6616	13.3005	-2.02415	95.101	-0.14473
4.02933	51.7371	13.2984	-2.02569	95.086	-0.14484
4.03767	51.8185	13.2963	-2.0272	95.0709	-0.144948
4.046	51.8919	13.2942	-2.02866	95.0559	-0.145052
4.05433	51.9691	13.2921	-2.03007	95.0409	-0.145154
4.06267	52.0461	13.29	-2.03148	95.0259	-0.145254
4.071	52.1241	13.288	-2.03287	95.0111	-0.145353
4.07933	52.1998	13.2859	-2.0342	94.9965	-0.145448
4.08767	52.2723	13.2839	-2.03547	94.9817	-0.145539
4.096	52.3499	13.2818	-2.03671	94.9669	-0.145628
4.10433	52.4305	13.2797	-2.03796	94.952	-0.145717
4.11267	52.5044	13.2776	-2.03913	94.9372	-0.145801
4.121	52.5835	13.2756	-2.0402	94.9225	-0.145878
4.12933	52.6549	13.2736	-2.04128	94.908	-0.145955
4.13767	52.7383	13.2715	-2.04232	94.8936	-0.146029
4.146	52.8135	13.2695	-2.04328	94.8792	-0.146098
4.15433	52.8877	13.2675	-2.0442	94.8645	-0.146163
4.16267	52.9675	13.2654	-2.04505	94.85	-0.146224
4.171	53.0434	13.2634	-2.04586	94.8357	-0.146282
4.17933	53.1252	13.2615	-2.04663	94.8216	-0.146337
4.18767	53.2022	13.2595	-2.04738	94.8073	-0.146391
4.196	53.2851	13.2575	-2.04809	94.7935	-0.146442
4.20433	53.3588	13.2556	-2.04881	94.7797	-0.146493
4.21267	53.4371	13.2537	-2.04944	94.7658	-0.146539
4.221	53.5201	13.2517	-2.05	94.7519	-0.146579
4.22933	53.5971	13.2498	-2.05052	94.7381	-0.146615
4.23767	53.6674	13.2479	-2.05104	94.7246	-0.146652
4.246	53.747	13.246	-2.05151	94.711	-0.146687
4.25433	53.8287	13.2441	-2.052	94.6974	-0.146721
4.26267	53.9014	13.2422	-2.05242	94.6839	-0.146752
4.271	53.9825	13.2403	-2.05275	94.6703	-0.146775
4.27933	54.062	13.2384	-2.05306	94.6567	-0.146797
4.28767	54.1379	13.2365	-2.05333	94.643	-0.146817
4.296	54.2126	13.2346	-2.05356	94.6294	-0.146833
4.30433	54.2964	13.2327	-2.05374	94.616	-0.146846
4.31267	54.3723	13.2309	-2.05392	94.6027	-0.146858
4.321	54.4509	13.229	-2.05403	94.5895	-0.146866
4.32933	54.5354	13.2271	-2.05409	94.5762	-0.14687
4.33767	54.6146	13.2253	-2.05408	94.5629	-0.14687
4.346	54.6913	13.2234	-2.05403	94.5498	-0.146867
4.35433	54.7752	13.2216	-2.05398	94.5367	-0.146863
4.36267	54.8557	13.2198	-2.05386	94.5237	-0.146854
4.371	54.929	13.218	-2.05368	94.5109	-0.146841
4.37933	55.0124	13.2162	-2.05348	94.4978	-0.146827
4.38767	55.09	13.2144	-2.05328	94.4848	-0.146813
4.396	55.1707	13.2126	-2.05302	94.4721	-0.146794
4.40433	55.2511	13.2108	-2.05269	94.4592	-0.146771
4.41267	55.3279	13.209	-2.05237	94.4464	-0.146748
4.421	55.4116	13.2072	-2.05199	94.4337	-0.146721
4.42933	55.4925	13.2055	-2.05159	94.4211	-0.146692
4.43767	55.5688	13.2037	-2.05114	94.4085	-0.14666
4.446	55.6503	13.202	-2.05069	94.3961	-0.146628
4.45433	55.7328	13.2002	-2.05024	94.3837	-0.146595
4.46267	55.8149	13.1985	-2.04969	94.3713	-0.146556
4.471	55.8941	13.1968	-2.04909	94.3591	-0.146513
4.47933	55.9782	13.1951	-2.04845	94.3468	-0.146468
4.48767	56.0557	13.1934	-2.04784	94.3348	-0.146424
4.496	56.1352	13.1917	-2.04714	94.3227	-0.146374
4.50433	56.2177	13.19	-2.04643	94.3107	-0.146323
4.51267	56.2966	13.1883	-2.04563	94.2986	-0.146266
4.521	56.3763	13.1867	-2.04481	94.2867	-0.146207
4.52933	56.4569	13.185	-2.04395	94.2748	-0.146146
4.53767	56.5392	13.1833	-2.04309	94.2627	-0.146084
4.546	56.6247	13.1816	-2.04221	94.2509	-0.146021
4.55433	56.7067	13.18	-2.04128	94.2393	-0.145955
4.56267	56.785	13.1784	-2.0403	94.2274	-0.145885
4.571	56.8717	13.1767	-2.03931	94.2154	-0.145814
4.57933	56.9494	13.1751	-2.03835	94.2037	-0.145745
4.58767	57.0257	13.1734	-2.03739	94.1921	-0.145677
4.596	57.1127	13.1718	-2.03639	94.1805	-0.145605
4.60433	57.1933	13.1702	-2.03536	94.169	-0.145532
4.61267	57.2723	13.1686	-2.03432	94.1576	-0.145457
4.621	57.362	13.167	-2.03324	94.1463	-0.14538
4.62933	57.4394	13.1654	-2.03216	94.1349	-0.145303
4.63767	57.5224	13.1638	-2.03108	94.1235	-0.145226
4.646	57.6061	13.1623	-2.02998	94.1123	-0.145147
4.65433	57.6888	13.1607	-2.0288	94.1011	-0.145063
4.66267	57.7707	13.1591	-2.0276	94.0897	-0.144977
4.671	57.855	13.1576	-2.02633	94.0787	-0.144886
4.67933	57.9403	13.156	-2.02504	94.0674	-0.144794
4.68767	58.0149	13.1544	-2.02375	94.0561	-0.144702
4.696	58.1001	13.1528	-2.02243	94.0448	-0.144607
4.70433	58.1823	13.1513	-2.02107	94.0337	-0.14451
4.71267	58.267	13.1497	-2.01969	94.0226	-0.144411
4.721	58.35	13.1482	-2.01831	94.0117	-0.144313
4.72933	58.4301	13.1467	-2.01694	94.0009	-0.144215
4.73767	58.5157	13.1452	-2.01556	93.9901	-0.144116
4.746	58.6009	13.1437	-2.01418	93.9795	-0.144017
4.75433	58.6816	13.1422	-2.01275	93.9686	-0.143915
4.76267	58.7618	13.1407	-2.01132	93.958	-0.143813
4.771	58.8472	13.1392	-2.00986	93.9472	-0.143708
4.77933	58.9363	13.1377	-2.0084	93.9367	-0.143604
4.78767	59.017	13.1362	-2.00694	93.9261	-0.1435
4.796	59.0998	13.1348	-2.00546	93.9156	-0.143394
4.80433	59.1836	13.1333	-2.00393	93.9049	-0.143284
4.81267	59.2692	13.1318	-2.00236	93.8941	-0.143172
4.821	59.353	13.1303	-2.00074	93.8836	-0.143056
4.82933	59.4296	13.1288	-1.99912	93.8731	-0.14294
4.83767	59.5178	13.1273	-1.99756	93.8625	-0.142829
4.846	59.6019	13.1259	-1.99594	93.852	-0.142713
4.85433	59.689	13.1244	-1.9943	93.8417	-0.142595
4.86267	59.7731	13.123	-1.99264	93.8313	-0.142477
4.871	59.8558	13.1215	-1.99099	93.821	-0.142359
4.87933	59.9441	13.1201	-1.98934	93.8107	-0.142241
4.88767	60.0281	13.1187	-1.98766	93.8007	-0.142121
4.896	60.1112	13.1173	-1.98601	93.7907	-0.142003
4.90433	60.1899	13.1159	-1.98436	93.7806	-0.141885
4.91267	60.2804	13.1145	-1.98262	93.7705	-0.141761
4.921	60.3634	13.1131	-1.98086	93.7606	-0.141634
4.92933	60.4462	13.1117	-1.97915	93.7506	-0.141512
4.93767	60.529	13.1103	-1.97743	93.7407	-0.141389
4.946	60.6115	13.1089	-1.97568	93.731	-0.141264
4.95433	60.6986	13.1076	-1.97388	93.7212	-0.141136
4.96267	60.7855	13.1062	-1.97208	93.7114	-0.141007
4.971	60.8698	13.1048	-1.97029	93.7015	-0.140879
4.97933	60.9514	13.1034	-1.96848	93.6917	-0.140749
4.98767	61.0427	13.1021	-1.96664	93.682	-0.140618
4.996	61.1199	13.1007	-1.96482	93.6723	-0.140487
5.00433	61.2108	13.0994	-1.96301	93.6627	-0.140358
5.01267	61.2931	13.098	-1.96115	93.6529	-0.140225
5.021	61.3796	13.0967	-1.95929	93.6432	-0.140092
5.02933	61.4653	13.0953	-1.95743	93.6334	-0.139959
5.03767	61.5547	13.0939	-1.95557	93.6238	-0.139826
5.046	61.6386	13.0926	-1.95368	93.6142	-0.139691
5.05433	61.7245	13.0913	-1.95177	93.6047	-0.139555
5.06267	61.8045	13.0899	-1.94983	93.5952	-0.139416
5.071	61.8947	13.0886	-1.94788	93.5855	-0.139276
5.07933	61.9812	13.0873	-1.94592	93.5761	-0.139137
5.08767	62.0683	13.086	-1.94397	93.5666	-0.138997
5.096	62.1497	13.0846	-1.94203	93.5573	-0.138858
5.10433	62.2362	13.0833	-1.9401	93.5479	-0.13872
5.11267	62.3196	13.082	-1.93814	93.5387	-0.13858
5.121	62.41	13.0807	-1.93618	93.5294	-0.13844
5.12933	62.4947	13.0794	-1.93421	93.5202	-0.138299
5.13767	62.5781	13.0782	-1.93227	93.511	-0.13816
5.146	62.6638	13.0769	-1.93033	93.5019	-0.138022
5.15433	62.7498	13.0756	-1.9284	93.493	-0.137884
5.16267	62.8361	13.0744	-1.92648	93.4838	-0.137746
5.171	62.9272	13.0731	-1.9245	93.4748	-0.137605
5.17933	63.0075	13.0718	-1.92254	93.4658	-0.137464
5.18767	63.099	13.0706	-1.92056	93.4569	-0.137323
5.196	63.1795	13.0694	-1.91855	93.448	-0.13718
5.20433	63.2658	13.0681	-1.91655	93.4392	-0.137037
5.21267	63.3532	13.0669	-1.91457	93.4303	-0.136895
5.221	63.4404	13.0656	-1.91258	93.4213	-0.136753
5.22933	63.5249	13.0643	-1.91056	93.4122	-0.136608
5.23767	63.6117	13.0631	-1.90853	93.4034	-0.136463
5.246	63.7022	13.0619	-1.90651	93.3947	-0.136318
5.25433	63.7854	13.0607	-1.90456	93.3858	-0.136179
5.26267	63.8748	13.0594	-1.90256	93.3771	-0.136036
5.271	63.9609	13.0582	-1.90053	93.3682	-0.135891
5.27933	64.0523	13.0569	-1.89852	93.3592	-0.135747
5.28767	64.1351	13.0557	-1.89654	93.3504	-0.135606
5.296	64.2201	13.0545	-1.89452	93.3417	-0.135461
5.30433	64.3101	13.0533	-1.89245	93.3328	-0.135314
5.31267	64.3967	13.052	-1.89043	93.3241	-0.135169
5.321	64.4836	13.0508	-1.88844	93.3153	-0.135027
5.32933	64.574	13.0496	-1.88644	93.3065	-0.134883
5.33767	64.6544	13.0483	-1.88438	93.2978	-0.134736
5.346	64.7454	13.0472	-1.88233	93.2892	-0.134589
5.35433	64.8323	13.0459	-1.88031	93.2806	-0.134445
5.36267	64.9217	13.0447	-1.87831	93.272	-0.134302
5.371	65.0069	13.0435	-1.87628	93.2633	-0.134157
5.37933	65.0872	13.0423	-1.87426	93.2547	-0.134013
5.38767	65.1769	13.0411	-1.8723	93.2461	-0.133872
5.396	65.259	13.0399	-1.87035	93.2377	-0.133733
5.40433	65.3509	13.0387	-1.86838	93.229	-0.133592
5.41267	65.4422	13.0375	-1.86645	93.2204	-0.133454
5.421	65.5209	13.0363	-1.86451	93.2119	-0.133316
5.42933	65.6123	13.0351	-1.86258	93.2034	-0.133177
5.43767	65.7039	13.0339	-1.86066	93.1948	-0.13304
5.446	65.7868	13.0328	-1.85875	93.1863	-0.132904
5.45433	65.8731	13.0316	-1.85684	93.1778	-0.132767
5.46267	65.9595	13.0304	-1.85495	93.1693	-0.132632
5.471	66.0487	13.0292	-1.85309	93.1609	-0.132499
5.47933	66.1305	13.028	-1.85121	93.1525	-0.132365
5.48767	66.2218	13.0269	-1.84936	93.1441	-0.132232
5.496	66.3115	13.0257	-1.8475	93.1356	-0.132099
5.50433	66.3894	13.0245	-1.84564	93.1271	-0.131966
5.51267	66.4787	13.0233	-1.84382	93.1187	-0.131836
5.521	66.5669	13.0221	-1.84198	93.1105	-0.131705
5.52933	66.6526	13.021	-1.84016	93.102	-0.131574
5.53767	66.743	13.0198	-1.83835	93.0936	-0.131445
5.546	66.8319	13.0186	-1.8366	93.0853	-0.13132
5.55433	66.9203	13.0174	-1.83482	93.0767	-0.131193
5.56267	67.0059	13.0162	-1.83308	93.0681	-0.131068
5.571	67.0888	13.015	-1.83136	93.0595	-0.130945
5.57933	67.1811	13.0138	-1.82965	93.051	-0.130823
5.58767	67.2676	13.0126	-1.82796	93.0425	-0.130702
5.596	67.3555	13.0114	-1.82628	93.0338	-0.130582
5.60433	67.4441	13.0102	-1.82467	93.0251	-0.130467
5.61267	67.5284	13.009	-1.82307	93.0167	-0.130353
5.621	67.6139	13.0078	-1.8215	93.008	-0.13024
5.62933	67.7036	13.0066	-1.8199	92.9993	-0.130126
5.63767	67.785	13.0054	-1.81836	92.9906	-0.130016
5.646	67.8698	13.0042	-1.81687	92.982	-0.129909
5.65433	67.9608	13.003	-1.81538	92.9735	-0.129802
5.66267	68.0491	13.0018	-1.81394	92.9648	-0.1297
5.671	68.136	13.0006	-1.81254	92.9561	-0.129599
5.67933	68.2217	12.9993	-1.81121	92.9473	-0.129504
5.68767	68.304	12.9981	-1.80984	92.9384	-0.129407
5.696	68.3942	12.9969	-1.80851	92.9296	-0.129311
5.70433	68.4805	12.9956	-1.80723	92.9209	-0.12922
5.71267	68.5657	12.9944	-1.80598	92.9121	-0.12913
5.721	68.6527	12.9932	-1.80476	92.9032	-0.129043
5.72933	68.7409	12.9919	-1.80354	92.8942	-0.128956
5.73767	68.8275	12.9906	-1.80238	92.8852	-0.128873
5.746	68.9068	12.9894	-1.8012	92.8764	-0.128789
5.75433	69.0008	12.9882	-1.80009	92.8675	-0.128709
5.76267	69.0846	12.9869	-1.79896	92.8587	-0.128628
5.771	69.1756	12.9857	-1.7979	92.8498	-0.128553
5.77933	69.2588	12.9845	-1.7969	92.841	-0.128481
5.78767	69.3436	12.9832	-1.79591	92.8317	-0.128411
5.796	69.4285	12.9819	-1.79496	92.8227	-0.128343
5.80433	69.5162	12.9807	-1.79403	92.8142	-0.128276
5.81267	69.6044	12.9795	-1.79313	92.8054	-0.128212
5.821	69.6881	12.9782	-1.79225	92.7964	-0.128149
5.82933	69.7772	12.9769	-1.7914	92.7871	-0.128088
5.83767	69.8611	12.9756	-1.79055	92.7778	-0.128027
5.846	69.9503	12.9743	-1.78974	92.7686	-0.127969
5.85433	70.0377	12.9731	-1.78895	92.7595	-0.127912
5.86267	70.1179	12.9718	-1.78818	92.7503	-0.127858
5.871	70.2084	12.9705	-1.78746	92.7414	-0.127806
5.87933	70.2927	12.9693	-1.78678	92.7322	-0.127758
5.88767	70.38	12.9679	-1.78611	92.7227	-0.12771
5.896	70.4624	12.9666	-1.78549	92.7132	-0.127665
5.90433	70.5509	12.9653	-1.78492	92.7039	-0.127624
5.91267	70.6332	12.964	-1.7844	92.6946	-0.127588
5.921	70.7223	12.9627	-1.78389	92.6856	-0.127551
5.92933	70.8093	12.9615	-1.78343	92.6765	-0.127518
5.93767	70.8915	12.9601	-1.78304	92.667	-0.12749
5.946	70.9807	12.9588	-1.78266	92.6575	-0.127463
5.95433	71.0653	12.9574	-1.78229	92.6478	-0.127436
5.96267	71.1507	12.9561	-1.7819	92.6383	-0.127409
5.971	71.2342	12.9548	-1.78158	92.6287	-0.127386
5.97933	71.3214	12.9535	-1.7813	92.6193	-0.127366
5.98767	71.4063	12.9521	-1.78103	92.61	-0.127347
5.996	71.487	12.9508	-1.78077	92.6003	-0.127328
6.00433	71.5803	12.9494	-1.78057	92.5904	-0.127314
6.01267	71.6658	12.9481	-1.78038	92.5807	-0.1273
6.021	71.7502	12.9467	-1.78018	92.5713	-0.127285
6.02933	71.8324	12.9454	-1.78001	92.5618	-0.127274
6.03767	71.9217	12.9441	-1.77987	92.5524	-0.127263
6.046	72.0082	12.9428	-1.77981	92.5428	-0.127259
6.05433	72.0914	12.9414	-1.77973	92.5331	-0.127254
6.06267	72.1763	12.94	-1.77961	92.5232	-0.127245
6.071	72.2594	12.9387	-1.77953	92.5134	-0.127239
6.07933	72.3443	12.9373	-1.77948	92.5036	-0.127236
6.08767	72.4351	12.9359	-1.77945	92.494	-0.127233
6.096	72.5226	12.9346	-1.77944	92.4842	-0.127233
6.10433	72.6106	12.9332	-1.77946	92.4742	-0.127235
6.11267	72.6886	12.9318	-1.77948	92.4642	-0.127235
6.121	72.7747	12.9304	-1.7795	92.4541	-0.127237
6.12933	72.8593	12.929	-1.77954	92.4441	-0.12724
6.13767	72.9479	12.9276	-1.77965	92.4342	-0.127248
6.146	73.033	12.9262	-1.7798	92.4243	-0.127258
6.15433	73.1203	12.9248	-1.77993	92.4143	-0.127268
6.16267	73.2036	12.9234	-1.78007	92.4043	-0.127278
6.171	73.2852	12.922	-1.78022	92.3943	-0.127289
6.17933	73.374	12.9206	-1.7804	92.3841	-0.127301
6.18767	73.4571	12.9192	-1.78055	92.374	-0.127312
6.196	73.5444	12.9177	-1.78074	92.3639	-0.127326
6.20433	73.6315	12.9163	-1.78092	92.3538	-0.127339
6.21267	73.719	12.9149	-1.78112	92.3437	-0.127353
6.221	73.7995	12.9135	-1.78127	92.3335	-0.127363
6.22933	73.8831	12.9121	-1.78141	92.3232	-0.127374
6.23767	73.9678	12.9106	-1.7816	92.3131	-0.127387
6.246	74.0533	12.9092	-1.7818	92.303	-0.127402
6.25433	74.137	12.9078	-1.78202	92.2926	-0.127417
6.26267	74.2183	12.9064	-1.78226	92.2827	-0.127434
6.271	74.3076	12.9049	-1.78252	92.2724	-0.127453
6.27933	74.3918	12.9035	-1.78277	92.2623	-0.127471
6.28767	74.4787	12.9021	-1.78305	92.2524	-0.127491
6.296	74.5551	12.9007	-1.78329	92.2421	-0.127508
6.30433	74.6487	12.8993	-1.78357	92.232	-0.127528
6.31267	74.7341	12.8979	-1.78391	92.2218	-0.127552
6.321	74.8145	12.8964	-1.78421	92.2116	-0.127574
6.32933	74.898	12.895	-1.78453	92.2015	-0.127597
6.33767	74.9834	12.8936	-1.78489	92.1912	-0.127622
6.346	75.0666	12.8922	-1.78521	92.1809	-0.127645
6.35433	75.1521	12.8907	-1.78551	92.1707	-0.127667
6.36267	75.2393	12.8893	-1.78583	92.1603	-0.12769
6.371	75.3258	12.8878	-1.78618	92.1498	-0.127715
6.37933	75.4062	12.8864	-1.78656	92.1395	-0.127742
6.38767	75.4899	12.8849	-1.78689	92.1293	-0.127766
6.396	75.5801	12.8835	-1.78724	92.1191	-0.127791
6.40433	75.659	12.8821	-1.78763	92.1088	-0.127818
6.41267	75.7434	12.8806	-1.78798	92.0983	-0.127844
6.421	75.8281	12.8791	-1.78827	92.0879	-0.127864
6.42933	75.9126	12.8777	-1.78858	92.0775	-0.127886
6.43767	75.9906	12.8762	-1.78891	92.067	-0.12791
6.446	76.082	12.8748	-1.7893	92.0566	-0.127938
6.45433	76.17	12.8733	-1.78971	92.0462	-0.127967
6.46267	76.2503	12.8719	-1.7901	92.0359	-0.127995
6.471	76.3295	12.8704	-1.79052	92.0254	-0.128025
6.47933	76.4127	12.8689	-1.79089	92.015	-0.128051
6.48767	76.5019	12.8675	-1.79124	92.0045	-0.128077
6.496	76.5814	12.866	-1.79161	91.9943	-0.128103
6.50433	76.6702	12.8646	-1.79202	91.9839	-0.128133
6.51267	76.7512	12.8631	-1.79245	91.9735	-0.128163
6.521	76.8367	12.8617	-1.79287	91.963	-0.128193
6.52933	76.92	12.8602	-1.79323	91.9526	-0.128219
6.53767	77.0126	12.8587	-1.79358	91.9421	-0.128244
6.546	77.0899	12.8572	-1.79398	91.9313	-0.128273
6.55433	77.1736	12.8558	-1.79436	91.9209	-0.128299
6.56267	77.2575	12.8543	-1.79481	91.9104	-0.128332
6.571	77.3472	12.8528	-1.79524	91.8998	-0.128363
6.57933	77.4262	12.8513	-1.79569	91.8891	-0.128395
6.58767	77.5132	12.8498	-1.79612	91.8784	-0.128425
6.596	77.5968	12.8484	-1.79657	91.8678	-0.128458
6.60433	77.6788	12.8469	-1.79699	91.8573	-0.128488
6.61267	77.7633	12.8454	-1.79743	91.8468	-0.128519
6.621	77.845	12.844	-1.79788	91.8364	-0.128551
6.62933	77.9273	12.8425	-1.7983	91.8259	-0.128581
6.63767	78.0088	12.841	-1.79875	91.8154	-0.128614
6.646	78.0979	12.8396	-1.79919	91.8049	-0.128645
6.65433	78.1758	12.8381	-1.79961	91.7943	-0.128675
6.66267	78.2621	12.8366	-1.80006	91.7839	-0.128707
6.671	78.3456	12.8352	-1.8005	91.7735	-0.128739
6.67933	78.4292	12.8337	-1.80094	91.763	-0.12877
6.68767	78.5088	12.8322	-1.80143	91.7525	-0.128805
6.696	78.5976	12.8308	-1.80192	91.7419	-0.12884
6.70433	78.6786	12.8293	-1.80238	91.7313	-0.128873
6.71267	78.7614	12.8278	-1.80285	91.7206	-0.128907
6.721	78.8421	12.8263	-1.80331	91.7098	-0.128939
6.72933	78.9288	12.8248	-1.80376	91.6991	-0.128972
6.73767	79.0178	12.8232	-1.80428	91.6883	-0.129009
6.746	79.0976	12.8218	-1.80474	91.6776	-0.129042
6.75433	79.183	12.8202	-1.80523	91.6668	-0.129077
6.76267	79.2628	12.8188	-1.80572	91.6562	-0.129112
6.771	79.3471	12.8173	-1.80619	91.6455	-0.129146
6.77933	79.4291	12.8158	-1.80665	91.6347	-0.129179
6.78767	79.5145	12.8143	-1.80713	91.6242	-0.129213
6.796	79.5961	12.8128	-1.80762	91.6134	-0.129247
6.80433	79.682	12.8113	-1.80815	91.6028	-0.129285
6.81267	79.7643	12.8098	-1.80864	91.592	-0.12932
6.821	79.8447	12.8083	-1.80909	91.5815	-0.129353
6.82933	79.9323	12.8068	-1.80959	91.5707	-0.129389
6.83767	80.0158	12.8053	-1.81009	91.5599	-0.129424
6.846	80.1014	12.8038	-1.81058	91.5489	-0.129459
6.85433	80.1809	12.8023	-1.81106	91.5382	-0.129494
6.86267	80.2654	12.8008	-1.8116	91.5274	-0.129533
6.871	80.3434	12.7992	-1.81214	91.5165	-0.129571
6.87933	80.4281	12.7977	-1.81266	91.5058	-0.129608
6.88767	80.5121	12.7962	-1.81314	91.4949	-0.129642
6.896	80.5948	12.7947	-1.81366	91.4841	-0.129679
6.90433	80.6782	12.7932	-1.81418	91.4731	-0.129716
6.91267	80.7656	12.7916	-1.81471	91.4621	-0.129755
6.921	80.8435	12.7901	-1.81523	91.4515	-0.129792
6.92933	80.9298	12.7886	-1.81576	91.4408	-0.129829
6.93767	81.0132	12.7871	-1.81628	91.4301	-0.129867
6.946	81.0942	12.7856	-1.81676	91.4192	-0.129901
6.95433	81.1779	12.7841	-1.81723	91.4084	-0.129935
6.96267	81.2583	12.7826	-1.81771	91.3976	-0.129969
6.971	81.3413	12.7811	-1.8182	91.3871	-0.130005
6.97933	81.4252	12.7796	-1.81872	91.3763	-0.130042
6.98767	81.5055	12.7781	-1.81922	91.3655	-0.130077
6.996	81.5907	12.7766	-1.81972	91.3545	-0.130113
7.00433	81.6772	12.7751	-1.82024	91.3437	-0.13015
7.01267	81.7529	12.7735	-1.82073	91.3328	-0.130185
7.021	81.8409	12.772	-1.82125	91.3217	-0.130222
7.02933	81.9239	12.7705	-1.82176	91.3108	-0.130258
7.03767	82.0083	12.7689	-1.82226	91.2999	-0.130294
7.046	82.0904	12.7674	-1.82275	91.289	-0.130329
7.05433	82.1727	12.7658	-1.82323	91.2778	-0.130364
7.06267	82.2574	12.7643	-1.82371	91.2667	-0.130398
7.071	82.3391	12.7628	-1.82422	91.2559	-0.130435
7.07933	82.4226	12.7613	-1.82467	91.2452	-0.130467
7.08767	82.506	12.7598	-1.82511	91.2343	-0.130498
7.096	82.5862	12.7582	-1.82557	91.2235	-0.130531
7.10433	82.6707	12.7567	-1.82602	91.2127	-0.130564
7.11267	82.7497	12.7552	-1.82649	91.2018	-0.130597
7.121	82.8264	12.7537	-1.82695	91.1909	-0.13063
7.12933	82.9104	12.7522	-1.82741	91.1799	-0.130663
7.13767	82.9955	12.7506	-1.82788	91.1691	-0.130696
7.146	83.0871	12.7491	-1.8283	91.1583	-0.130727
7.15433	83.1694	12.7476	-1.82868	91.1474	-0.130754
7.16267	83.2517	12.7461	-1.82908	91.1365	-0.130782
7.171	83.3363	12.7446	-1.82949	91.1256	-0.130812
7.17933	83.4173	12.7431	-1.82987	91.1149	-0.130838
7.18767	83.502	12.7415	-1.83024	91.1041	-0.130865
7.196	83.5838	12.74	-1.83059	91.0931	-0.13089
7.20433	83.6651	12.7385	-1.83097	91.0822	-0.130917
7.21267	83.7534	12.737	-1.83132	91.0714	-0.130943
7.221	83.8353	12.7355	-1.83168	91.0607	-0.130968
7.22933	83.9058	12.734	-1.83201	91.0499	-0.130992
7.23767	83.9957	12.7324	-1.83234	91.0389	-0.131016
7.246	84.079	12.7309	-1.83269	91.0281	-0.13104
7.25433	84.1655	12.7294	-1.83302	91.0173	-0.131064
7.26267	84.2434	12.7279	-1.83333	91.0064	-0.131086
7.271	84.3307	12.7264	-1.8336	90.9957	-0.131106
7.27933	84.4122	12.7249	-1.83386	90.985	-0.131124
7.28767	84.4894	12.7234	-1.83411	90.9743	-0.131142
7.296	84.5751	12.7219	-1.83437	90.9636	-0.13116
7.30433	84.6587	12.7204	-1.83459	90.9527	-0.131176
7.31267	84.7429	12.7189	-1.83481	90.9419	-0.131192
7.321	84.8217	12.7174	-1.83501	90.9313	-0.131206
7.32933	84.9063	12.7159	-1.83518	90.9207	-0.131218
7.33767	84.9936	12.7144	-1.83535	90.9101	-0.13123
7.346	85.0784	12.7129	-1.8355	90.8994	-0.131241
7.35433	85.1583	12.7114	-1.83561	90.8886	-0.131249
7.36267	85.238	12.7099	-1.8357	90.8781	-0.131255
7.371	85.3247	12.7085	-1.83575	90.8675	-0.131259
7.37933	85.4079	12.707	-1.83579	90.8572	-0.131262
7.38767	85.485	12.7055	-1.83581	90.8467	-0.131263
7.396	85.5702	12.7041	-1.83583	90.8361	-0.131265
7.40433	85.6553	12.7026	-1.83585	90.8256	-0.131266
7.41267	85.7385	12.7011	-1.83585	90.8148	-0.131266
7.421	85.8212	12.6996	-1.83581	90.8042	-0.131263
7.42933	85.9064	12.6982	-1.83574	90.7939	-0.131258
7.43767	85.9854	12.6967	-1.83566	90.7835	-0.131253
7.446	86.0695	12.6952	-1.83559	90.7731	-0.131248
7.45433	86.1508	12.6938	-1.83547	90.7628	-0.131239
7.46267	86.239	12.6923	-1.8353	90.7523	-0.131227
7.471	86.3241	12.6909	-1.83509	90.742	-0.131212
7.47933	86.4018	12.6895	-1.83488	90.7319	-0.131197
7.48767	86.4862	12.6881	-1.83465	90.7217	-0.131181
7.496	86.5678	12.6867	-1.83437	90.7116	-0.13116
7.50433	86.6519	12.6852	-1.83404	90.7015	-0.131137
7.51267	86.7369	12.6838	-1.83367	90.6913	-0.13111
7.521	86.8205	12.6824	-1.83329	90.6811	-0.131084
7.52933	86.9039	12.681	-1.83288	90.671	-0.131054
7.53767	86.984	12.6796	-1.83246	90.661	-0.131024
7.546	87.0726	12.6782	-1.83201	90.6511	-0.130992
7.55433	87.1558	12.6768	-1.83158	90.6411	-0.130961
7.56267	87.2371	12.6754	-1.83105	90.6311	-0.130923
7.571	87.3214	12.674	-1.83045	90.6213	-0.13088
7.57933	87.402	12.6727	-1.82985	90.6116	-0.130837
7.58767	87.4845	12.6713	-1.82922	90.6019	-0.130792
7.596	87.5654	12.6699	-1.82859	90.5921	-0.130747
7.60433	87.6565	12.6686	-1.82792	90.5825	-0.130699
7.61267	87.7398	12.6672	-1.82721	90.5728	-0.130649
7.621	87.8214	12.6659	-1.82645	90.5631	-0.130594
7.62933	87.9058	12.6645	-1.82568	90.5534	-0.130539
7.63767	87.9927	12.6632	-1.82482	90.544	-0.130478
7.646	88.0779	12.6619	-1.82395	90.5345	-0.130416
7.65433	88.1575	12.6606	-1.82306	90.5251	-0.130352
7.66267	88.2429	12.6593	-1.82212	90.5157	-0.130285
7.671	88.3301	12.658	-1.82117	90.5066	-0.130217
7.67933	88.4119	12.6567	-1.82018	90.4975	-0.130146
7.68767	88.4929	12.6554	-1.81915	90.4882	-0.130072
7.696	88.5798	12.6541	-1.8181	90.4791	-0.129997
7.70433	88.6617	12.6529	-1.81697	90.47	-0.129917
7.71267	88.7449	12.6516	-1.81578	90.461	-0.129831
7.721	88.8305	12.6503	-1.81462	90.452	-0.129749
7.72933	88.9174	12.6491	-1.81338	90.443	-0.129659
7.73767	89.0019	12.6478	-1.81211	90.4341	-0.129569
7.746	89.0852	12.6466	-1.8108	90.4252	-0.129475
7.75433	89.1689	12.6454	-1.80944	90.4163	-0.129378
7.76267	89.2546	12.6441	-1.80807	90.4076	-0.12928
7.771	89.3386	12.6429	-1.80665	90.3991	-0.129179
7.77933	89.4237	12.6417	-1.80521	90.3905	-0.129075
7.78767	89.5047	12.6406	-1.80374	90.382	-0.12897
7.796	89.5896	12.6394	-1.80223	90.3737	-0.128862
7.80433	89.6756	12.6382	-1.80067	90.3653	-0.128751
7.81267	89.7588	12.6371	-1.79914	90.3569	-0.128641
7.821	89.8368	12.6359	-1.79757	90.3484	-0.128529
7.82933	89.9281	12.6347	-1.79598	90.3401	-0.128415
7.83767	90.017	12.6336	-1.79435	90.332	-0.128299
7.846	90.0972	12.6324	-1.79264	90.3237	-0.128177
7.85433	90.1791	12.6313	-1.7909	90.3156	-0.128052
7.86267	90.266	12.6301	-1.78912	90.3075	-0.127925
7.871	90.3478	12.629	-1.78732	90.2992	-0.127796
7.87933	90.436	12.6278	-1.78547	90.291	-0.127664
7.88767	90.5199	12.6267	-1.78359	90.2829	-0.12753
7.896	90.6077	12.6256	-1.78166	90.2751	-0.127392
7.90433	90.6888	12.6245	-1.77972	90.2671	-0.127253
7.91267	90.7739	12.6234	-1.77774	90.2591	-0.127111
7.921	90.86	12.6223	-1.77571	90.2513	-0.126966
7.92933	90.9433	12.6212	-1.77371	90.2435	-0.126823
7.93767	91.0313	12.6201	-1.7717	90.2356	-0.12668
7.946	91.1146	12.619	-1.76965	90.228	-0.126533
7.95433	91.1981	12.618	-1.76759	90.2205	-0.126385
7.96267	91.2819	12.6169	-1.76551	90.2132	-0.126237
7.971	91.3718	12.6159	-1.76343	90.2059	-0.126088
7.97933	91.4523	12.6149	-1.76131	90.1984	-0.125936
7.98767	91.5387	12.6139	-1.75913	90.1913	-0.125781
7.996	91.6216	12.6129	-1.75699	90.184	-0.125628
8.00433	91.7096	12.6118	-1.75483	90.1767	-0.125473
8.01267	91.7923	12.6109	-1.75261	90.1697	-0.125314
8.021	91.8788	12.6098	-1.75038	90.1624	-0.125155
8.02933	91.9679	12.6088	-1.74815	90.1551	-0.124996
8.03767	92.0502	12.6078	-1.7459	90.1479	-0.124835
8.046	92.1407	12.6068	-1.74363	90.1406	-0.124672
8.05433	92.2208	12.6058	-1.74131	90.1333	-0.124506
8.06267	92.3121	12.6047	-1.73899	90.126	-0.124341
8.071	92.3911	12.6037	-1.73668	90.1187	-0.124175
8.07933	92.4791	12.6028	-1.7343	90.1117	-0.124005
8.08767	92.5699	12.6018	-1.73194	90.1047	-0.123836
8.096	92.6512	12.6008	-1.72956	90.0975	-0.123666
8.10433	92.7396	12.5998	-1.72716	90.0905	-0.123495
8.11267	92.8194	12.5988	-1.72472	90.0837	-0.12332
8.121	92.9037	12.5979	-1.72229	90.0767	-0.123147
8.12933	92.9887	12.5969	-1.71989	90.0699	-0.122975
8.13767	93.0777	12.596	-1.71749	90.0634	-0.122803
8.146	93.1628	12.5951	-1.71506	90.0567	-0.122629
8.15433	93.2519	12.5941	-1.71263	90.0501	-0.122456
8.16267	93.3364	12.5932	-1.71021	90.0435	-0.122283
8.171	93.4219	12.5922	-1.70776	90.0365	-0.122108
8.17933	93.5062	12.5913	-1.70535	90.0298	-0.121935
8.18767	93.5924	12.5904	-1.70287	90.0232	-0.121758
8.196	93.6775	12.5894	-1.70044	90.0165	-0.121584
8.20433	93.7607	12.5885	-1.698	90.0098	-0.12141
8.21267	93.8449	12.5876	-1.69555	90.0031	-0.121235
8.221	93.929	12.5866	-1.69308	89.9962	-0.121058
8.22933	94.019	12.5857	-1.69064	89.9895	-0.120883
8.23767	94.1041	12.5847	-1.68816	89.9827	-0.120706
8.246	94.1908	12.5838	-1.68567	89.976	-0.120528
8.25433	94.2785	12.5829	-1.68318	89.9697	-0.12035
8.26267	94.3589	12.582	-1.68067	89.9632	-0.12017
8.271	94.4416	12.5811	-1.6782	89.9567	-0.119994
8.27933	94.5331	12.5802	-1.67571	89.9503	-0.119816
8.28767	94.6184	12.5793	-1.67325	89.944	-0.11964
8.296	94.6989	12.5784	-1.67076	89.9377	-0.119462
8.30433	94.7889	12.5776	-1.66827	89.9316	-0.119284
8.31267	94.8759	12.5767	-1.66576	89.9254	-0.119105
8.321	94.9586	12.5758	-1.66331	89.9191	-0.118929
8.32933	95.0467	12.5749	-1.66089	89.9129	-0.118756
8.33767	95.1304	12.5741	-1.65846	89.9065	-0.118582
8.346	95.2198	12.5732	-1.65598	89.9004	-0.118405
8.35433	95.2988	12.5723	-1.65354	89.8942	-0.118231
8.36267	95.3849	12.5715	-1.65113	89.888	-0.118058
8.371	95.4738	12.5706	-1.64866	89.8818	-0.117882
8.37933	95.5587	12.5697	-1.64621	89.8757	-0.117707
8.38767	95.647	12.5689	-1.64374	89.8696	-0.11753
8.396	95.7328	12.568	-1.64133	89.8634	-0.117357
8.40433	95.8153	12.5672	-1.63889	89.8574	-0.117183
8.41267	95.9014	12.5663	-1.63645	89.8511	-0.117009
8.421	95.99	12.5655	-1.63401	89.8451	-0.116834
8.42933	96.0761	12.5646	-1.6316	89.839	-0.116662
8.43767	96.1628	12.5638	-1.62916	89.8331	-0.116487
8.446	96.2484	12.5629	-1.62669	89.827	-0.116311
8.45433	96.3328	12.5621	-1.62426	89.821	-0.116137
8.46267	96.4166	12.5613	-1.62185	89.815	-0.115965
8.471	96.501	12.5604	-1.61945	89.809	-0.115793
8.47933	96.5916	12.5596	-1.61704	89.8029	-0.115621
8.48767	96.6745	12.5587	-1.61465	89.797	-0.11545
8.496	96.7586	12.5579	-1.61225	89.7911	-0.115278
8.50433	96.8472	12.5571	-1.60986	89.7851	-0.115107
8.51267	96.9313	12.5563	-1.6075	89.7793	-0.114939
8.521	97.015	12.5554	-1.60516	89.7734	-0.114772
8.52933	97.1051	12.5546	-1.60283	89.7675	-0.114605
8.53767	97.1892	12.5538	-1.60051	89.7618	-0.114439
8.546	97.2711	12.553	-1.59817	89.7558	-0.114272
8.55433	97.3596	12.5522	-1.59583	89.7501	-0.114104
8.56267	97.4475	12.5514	-1.59352	89.7444	-0.113939
8.571	97.5357	12.5506	-1.59122	89.7387	-0.113775
8.57933	97.6172	12.5498	-1.5889	89.7329	-0.113609
8.58767	97.7005	12.5489	-1.58659	89.7269	-0.113443
8.596	97.7872	12.5481	-1.58428	89.7211	-0.113278
8.60433	97.8782	12.5473	-1.582	89.7151	-0.113115
8.61267	97.9575	12.5465	-1.57971	89.7093	-0.112952
8.621	98.0429	12.5457	-1.57739	89.7034	-0.112786
8.62933	98.1325	12.5448	-1.57513	89.6976	-0.112624
8.63767	98.2204	12.544	-1.57288	89.6919	-0.112464
8.646	98.3009	12.5432	-1.57058	89.6862	-0.112299
8.65433	98.388	12.5425	-1.56828	89.6805	-0.112134
8.66267	98.4754	12.5417	-1.56601	89.6749	-0.111972
8.671	98.5626	12.5409	-1.5638	89.6694	-0.111814
8.67933	98.6485	12.5401	-1.56158	89.6637	-0.111655
8.68767	98.7324	12.5393	-1.55932	89.6579	-0.111494
8.696	98.8207	12.5385	-1.55709	89.6522	-0.111335
8.70433	98.9082	12.5377	-1.55487	89.6466	-0.111176
8.71267	98.9957	12.5369	-1.55265	89.6411	-0.111017
8.721	99.0781	12.5361	-1.55043	89.6353	-0.110858
8.72933	99.16	12.5353	-1.54823	89.6297	-0.110701
8.73767	99.2438	12.5345	-1.54606	89.624	-0.110546
8.746	99.3345	12.5337	-1.54388	89.6183	-0.11039
8.75433	99.4213	12.533	-1.54168	89.6128	-0.110232
8.76267	99.5062	12.5322	-1.53951	89.6072	-0.110078
8.771	99.5939	12.5314	-1.53735	89.6018	-0.109923
8.77933	99.6795	12.5307	-1.53521	89.5963	-0.10977
8.78767	99.7665	12.5299	-1.53309	89.5909	-0.109618
8.796	99.8471	12.5292	-1.53097	89.5855	-0.109467
8.80433	99.9371	12.5284	-1.5289	89.5801	-0.109319
8.81267	100.022	12.5277	-1.52683	89.5749	-0.109171
8.821	100.108	12.5269	-1.52473	89.5695	-0.109021
8.82933	100.194	12.5262	-1.52265	89.5643	-0.108872
8.83767	100.278	12.5254	-1.52061	89.5588	-0.108726
8.846	100.362	12.5246	-1.51854	89.5532	-0.108578
8.85433	100.447	12.5239	-1.51649	89.5479	-0.108431
8.86267	100.534	12.5232	-1.51445	89.5426	-0.108286
8.871	100.62	12.5224	-1.51244	89.5373	-0.108142
8.87933	100.705	12.5217	-1.51044	89.5319	-0.107999
8.88767	100.793	12.5209	-1.5084	89.5267	-0.107853
8.896	100.879	12.5202	-1.50636	89.5214	-0.107707
8.90433	100.961	12.5195	-1.50437	89.5162	-0.107565
8.91267	101.047	12.5187	-1.50236	89.511	-0.107421
8.921	101.136	12.518	-1.50037	89.5057	-0.107279
8.92933	101.22	12.5173	-1.49838	89.5005	-0.107137
8.93767	101.304	12.5165	-1.49641	89.4952	-0.106996
8.946	101.392	12.5158	-1.49442	89.4898	-0.106854
8.95433	101.483	12.515	-1.49245	89.4844	-0.106713
8.96267	101.565	12.5143	-1.49047	89.4789	-0.106571
8.971	101.647	12.5135	-1.48852	89.4734	-0.106432
8.97933	101.735	12.5127	-1.4866	89.4679	-0.106295
8.98767	101.82	12.512	-1.4847	89.4625	-0.106159
8.996	101.902	12.5112	-1.48279	89.4572	-0.106022
9.00433	101.99	12.5105	-1.48087	89.4521	-0.105885
9.01267	102.072	12.5098	-1.47897	89.4467	-0.105749
9.021	102.157	12.509	-1.47708	89.4415	-0.105614
9.02933	102.247	12.5083	-1.4752	89.4363	-0.105479
9.03767	102.333	12.5076	-1.4733	89.431	-0.105343
9.046	102.418	12.5068	-1.47139	89.4258	-0.105207
9.05433	102.505	12.5061	-1.46955	89.4206	-0.105075
9.06267	102.589	12.5054	-1.46769	89.4156	-0.104942
9.071	102.672	12.5047	-1.46579	89.4103	-0.104806
9.07933	102.755	12.5039	-1.46394	89.405	-0.104674
9.08767	102.846	12.5032	-1.46207	89.3996	-0.10454
9.096	102.932	12.5025	-1.46022	89.3946	-0.104408
9.10433	103.019	12.5017	-1.45837	89.3895	-0.104276
9.11267	103.1	12.501	-1.45656	89.3845	-0.104146
9.121	103.19	12.5003	-1.45475	89.3795	-0.104017
9.12933	103.275	12.4997	-1.45295	89.3745	-0.103888
9.13767	103.356	12.499	-1.45111	89.3695	-0.103757
9.146	103.442	12.4983	-1.44929	89.3645	-0.103626
9.15433	103.531	12.4976	-1.4475	89.3596	-0.103499
9.16267	103.614	12.4969	-1.44569	89.3546	-0.10337
9.171	103.701	12.4962	-1.44393	89.3495	-0.103243
9.17933	103.789	12.4954	-1.44217	89.3443	-0.103117
9.18767	103.872	12.4947	-1.44042	89.3391	-0.102992
9.196	103.96	12.494	-1.43867	89.3341	-0.102867
9.20433	104.041	12.4933	-1.43695	89.3292	-0.102744
9.21267	104.127	12.4926	-1.43521	89.3242	-0.10262
9.221	104.212	12.4919	-1.43348	89.3191	-0.102496
9.22933	104.302	12.4912	-1.43177	89.3139	-0.102374
9.23767	104.384	12.4905	-1.43007	89.3088	-0.102252
9.246	104.469	12.4898	-1.4284	89.3038	-0.102133
9.25433	104.56	12.4891	-1.42672	89.299	-0.102013
9.26267	104.642	12.4884	-1.42501	89.2939	-0.101891
9.271	104.726	12.4877	-1.42333	89.2891	-0.10177
9.27933	104.81	12.487	-1.42167	89.2842	-0.101652
9.28767	104.895	12.4863	-1.41998	89.279	-0.101531
9.296	104.982	12.4856	-1.41831	89.274	-0.101412
9.30433	105.058	12.4849	-1.41668	89.2692	-0.101295
9.31267	105.152	12.4843	-1.415	89.2645	-0.101175
9.321	105.235	12.4836	-1.41334	89.2597	-0.101056
9.32933	105.318	12.4829	-1.41169	89.2548	-0.100938
9.33767	105.408	12.4822	-1.41003	89.2499	-0.100819
9.346	105.486	12.4816	-1.40841	89.2452	-0.100703
9.35433	105.573	12.4809	-1.40677	89.2402	-0.100586
9.36267	105.665	12.4802	-1.40513	89.2352	-0.100469
9.371	105.743	12.4795	-1.40353	89.2303	-0.100355
9.37933	105.834	12.4788	-1.40196	89.2256	-0.100242
9.38767	105.92	12.4781	-1.40037	89.2206	-0.100129
9.396	106.009	12.4774	-1.39878	89.2157	-0.100015
9.40433	106.088	12.4768	-1.3972	89.2108	-0.0999018
9.41267	106.176	12.4761	-1.39564	89.2058	-0.0997904
9.421	106.262	12.4754	-1.39406	89.201	-0.0996775
9.42933	106.348	12.4747	-1.39249	89.1962	-0.099565
9.43767	106.427	12.474	-1.39093	89.1913	-0.099454
9.446	106.516	12.4734	-1.38938	89.1866	-0.0993428
9.45433	106.603	12.4727	-1.38781	89.1819	-0.0992304
9.46267	106.687	12.472	-1.38622	89.1771	-0.099117
9.471	106.774	12.4714	-1.38466	89.1725	-0.0990053
9.47933	106.86	12.4707	-1.38312	89.1678	-0.0988953
9.48767	106.947	12.4701	-1.3816	89.1631	-0.0987869
9.496	107.034	12.4695	-1.38003	89.1586	-0.098674
9.50433	107.115	12.4688	-1.37848	89.1539	-0.0985634
9.51267	107.209	12.4681	-1.37698	89.1491	-0.0984566
9.521	107.288	12.4675	-1.37548	89.1445	-0.0983493
9.52933	107.373	12.4668	-1.374	89.1399	-0.0982429
9.53767	107.455	12.4662	-1.37252	89.1351	-0.0981372
9.546	107.551	12.4655	-1.37106	89.1303	-0.0980328
9.55433	107.63	12.4648	-1.36962	89.1256	-0.0979303
9.56267	107.714	12.4642	-1.36818	89.1209	-0.0978268
9.571	107.797	12.4635	-1.36673	89.1161	-0.0977231
9.57933	107.891	12.4629	-1.36532	89.1115	-0.0976224
9.58767	107.975	12.4622	-1.36391	89.1069	-0.0975216
9.596	108.063	12.4616	-1.36245	89.1024	-0.0974173
9.60433	108.145	12.461	-1.36101	89.0979	-0.0973143
9.61267	108.228	12.4603	-1.35956	89.0934	-0.0972104
9.621	108.309	12.4597	-1.35808	89.0889	-0.097105
9.62933	108.399	12.4591	-1.35661	89.0845	-0.0969999
9.63767	108.481	12.4585	-1.35515	89.08	-0.0968951
9.646	108.571	12.4578	-1.3537	89.0756	-0.0967917
9.65433	108.655	12.4572	-1.35226	89.0711	-0.0966885
9.66267	108.741	12.4566	-1.35081	89.0664	-0.0965852
9.671	108.824	12.4559	-1.34942	89.0619	-0.0964854
9.67933	108.915	12.4553	-1.34802	89.0575	-0.0963854
9.68767	108.998	12.4547	-1.34661	89.0531	-0.0962847
9.696	109.077	12.454	-1.34522	89.0482	-0.0961856
9.70433	109.166	12.4534	-1.34384	89.0437	-0.0960869
9.71267	109.248	12.4527	-1.34247	89.0389	-0.095989
9.721	109.333	12.4521	-1.34108	89.0342	-0.0958894
9.72933	109.414	12.4514	-1.33973	89.0295	-0.0957928
9.73767	109.504	12.4508	-1.33837	89.0251	-0.0956954
9.746	109.584	12.4502	-1.337	89.0206	-0.0955976
9.75433	109.673	12.4496	-1.33563	89.0163	-0.0954998
9.76267	109.759	12.4489	-1.33428	89.0118	-0.0954029
9.771	109.837	12.4483	-1.33293	89.0071	-0.0953066
9.77933	109.924	12.4477	-1.33158	89.0029	-0.0952101
9.78767	110.009	12.4471	-1.33028	88.9985	-0.0951172
9.796	110.092	12.4464	-1.32897	88.9939	-0.0950233
9.80433	110.181	12.4458	-1.32765	88.9895	-0.0949294
9.81267	110.264	12.4452	-1.32634	88.9851	-0.0948352
9.821	110.356	12.4445	-1.32502	88.9805	-0.0947413
9.82933	110.435	12.4439	-1.32374	88.9757	-0.0946492
9.83767	110.522	12.4432	-1.32242	88.9711	-0.0945549
9.846	110.609	12.4426	-1.32112	88.9664	-0.0944621
9.85433	110.695	12.442	-1.31984	88.9619	-0.0943704
9.86267	110.775	12.4413	-1.31857	88.9572	-0.0942799
9.871	110.865	12.4407	-1.31726	88.9529	-0.0941865
9.87933	110.948	12.4401	-1.31598	88.9486	-0.094095
9.88767	111.033	12.4395	-1.3147	88.9442	-0.0940029
9.896	111.118	12.4389	-1.31343	88.9398	-0.0939124
9.90433	111.202	12.4382	-1.31216	88.9354	-0.0938215
9.91267	111.287	12.4376	-1.31089	88.931	-0.0937311
9.921	111.376	12.437	-1.30965	88.9266	-0.0936423
9.92933	111.458	12.4364	-1.30842	88.9222	-0.0935541
9.93767	111.543	12.4358	-1.30716	88.9178	-0.093464
9.946	111.631	12.4352	-1.3059	88.9137	-0.0933742
9.95433	111.715	12.4346	-1.30465	88.9091	-0.0932848
9.96267	111.799	12.4339	-1.30343	88.9046	-0.0931971
9.971	111.886	12.4333	-1.30222	88.9004	-0.0931105
9.97933	111.972	12.4327	-1.30096	88.896	-0.0930208
9.98767	112.061	12.4321	-1.29975	88.8918	-0.0929339
9.996	112.14	12.4316	-1.29851	88.8879	-0.0928455
10.0043	112.222	12.431	-1.29728	88.8835	-0.0927579
10.0127	112.307	12.4304	-1.29606	88.8792	-0.0926701
10.021	112.391	12.4298	-1.29486	88.8749	-0.0925846
10.0293	112.479	12.4291	-1.29365	88.8704	-0.0924981
10.0377	112.562	12.4285	-1.29245	88.8661	-0.0924122
10.046	112.651	12.428	-1.29124	88.8619	-0.0923256
10.0543	112.737	12.4274	-1.29004	88.8575	-0.0922397
10.0627	112.817	12.4268	-1.28886	88.8534	-0.0921552
10.071	112.905	12.4262	-1.28766	88.8491	-0.0920698
10.0793	112.989	12.4255	-1.28646	88.8446	-0.0919838
10.0877	113.069	12.425	-1.2853	88.8404	-0.0919009
10.096	113.155	12.4244	-1.28413	88.8362	-0.0918176
10.1043	113.242	12.4238	-1.28297	88.832	-0.0917344
10.1127	113.328	12.4232	-1.2818	88.8279	-0.0916507
10.121	113.41	12.4226	-1.28065	88.8235	-0.0915682
10.1293	113.494	12.422	-1.27949	88.819	-0.0914854
10.1377	113.581	12.4214	-1.27834	88.8146	-0.0914035
10.146	113.662	12.4207	-1.27724	88.8103	-0.0913246
10.1543	113.747	12.4202	-1.27612	88.8061	-0.0912444
10.1627	113.835	12.4196	-1.27502	88.8019	-0.0911658
10.171	113.92	12.419	-1.27388	88.7976	-0.0910847
10.1793	114.006	12.4184	-1.27275	88.7933	-0.0910037
10.1877	114.094	12.4177	-1.27162	88.7889	-0.0909226
10.196	114.18	12.4172	-1.27051	88.7847	-0.0908433
10.2043	114.258	12.4166	-1.26937	88.7806	-0.0907621
10.2127	114.342	12.416	-1.26825	88.7765	-0.0906819
10.221	114.424	12.4154	-1.26712	88.7725	-0.090601
10.2293	114.507	12.4148	-1.26599	88.7682	-0.0905202
10.2377	114.599	12.4142	-1.26487	88.7638	-0.0904406
10.246	114.678	12.4136	-1.26375	88.7595	-0.0903605
10.2543	114.77	12.413	-1.26263	88.7552	-0.0902801
10.2627	114.854	12.4124	-1.26151	88.7509	-0.0901998
10.271	114.937	12.4118	-1.26042	88.7467	-0.0901223
10.2793	115.02	12.4113	-1.25934	88.7424	-0.0900447
10.2877	115.107	12.4107	-1.25827	88.7384	-0.0899683
10.296	115.192	12.4101	-1.25722	88.7344	-0.0898935
10.3043	115.277	12.4096	-1.25618	88.7303	-0.0898187
10.3127	115.36	12.409	-1.25509	88.7264	-0.089741
10.321	115.447	12.4084	-1.25402	88.7223	-0.0896642
10.3293	115.527	12.4079	-1.25297	88.7183	-0.0895897
10.3377	115.612	12.4073	-1.25196	88.7145	-0.0895173
10.346	115.7	12.4068	-1.25094	88.7103	-0.0894445
10.3543	115.784	12.4062	-1.2499	88.7062	-0.0893697
10.3627	115.869	12.4056	-1.24883	88.7023	-0.0892936
10.371	115.952	12.405	-1.24781	88.698	-0.0892204
10.3793	116.036	12.4045	-1.24677	88.6939	-0.0891458
10.3877	116.119	12.4039	-1.2457	88.6897	-0.0890697
10.396	116.206	12.4033	-1.24467	88.6857	-0.0889963
10.4043	116.295	12.4027	-1.24364	88.6816	-0.0889225
10.4127	116.376	12.4022	-1.24261	88.6775	-0.0888488
10.421	116.461	12.4016	-1.24157	88.6734	-0.0887744
10.4293	116.546	12.4011	-1.24053	88.6696	-0.0887001
10.4377	116.629	12.4005	-1.2395	88.6655	-0.0886265
10.446	116.715	12.3999	-1.2385	88.6616	-0.0885546
10.4543	116.8	12.3994	-1.23746	88.6578	-0.0884807
10.4627	116.882	12.3988	-1.23641	88.6538	-0.0884056
10.471	116.967	12.3983	-1.23544	88.6497	-0.0883362
10.4793	117.054	12.3977	-1.23443	88.6456	-0.0882637
10.4877	117.135	12.3971	-1.23342	88.6415	-0.0881919
10.496	117.218	12.3965	-1.2324	88.6373	-0.0881189
10.5043	117.308	12.396	-1.2314	88.6333	-0.0880471
10.5127	117.394	12.3954	-1.23043	88.6292	-0.0879775
10.521	117.478	12.3949	-1.22947	88.6253	-0.0879087
10.5293	117.556	12.3943	-1.2285	88.6212	-0.0878396
10.5377	117.644	12.3937	-1.22753	88.617	-0.0877703
10.546	117.729	12.3931	-1.22656	88.6129	-0.0877007
10.5543	117.813	12.3926	-1.22556	88.6089	-0.0876296
10.5627	117.901	12.392	-1.22461	88.6049	-0.0875619
10.571	117.984	12.3915	-1.22366	88.6009	-0.0874936
10.5793	118.068	12.391	-1.22272	88.5973	-0.0874262
10.5877	118.153	12.3904	-1.22175	88.5933	-0.0873572
10.596	118.235	12.3899	-1.22076	88.5895	-0.0872866
10.6043	118.324	12.3893	-1.21977	88.5856	-0.0872154
10.6127	118.406	12.3888	-1.21879	88.5816	-0.0871454
10.621	118.492	12.3882	-1.21782	88.5778	-0.087076
10.6293	118.573	12.3877	-1.21686	88.5739	-0.0870077
10.6377	118.659	12.3871	-1.21593	88.57	-0.0869407
10.646	118.742	12.3866	-1.21498	88.5662	-0.086873
10.6543	118.827	12.3861	-1.21403	88.5623	-0.0868054
10.6627	118.915	12.3855	-1.21311	88.5582	-0.086739
10.671	118.999	12.3849	-1.21217	88.5543	-0.0866723
10.6793	119.081	12.3844	-1.21126	88.5504	-0.086607
10.6877	119.169	12.3838	-1.21035	88.5464	-0.0865423
10.696	119.255	12.3833	-1.20945	88.5425	-0.0864778
10.7043	119.332	12.3828	-1.20855	88.5387	-0.086413
10.7127	119.417	12.3822	-1.20763	88.5349	-0.0863476
10.721	119.5	12.3817	-1.20669	88.531	-0.0862801
10.7293	119.587	12.3811	-1.20576	88.527	-0.0862141
10.7377	119.67	12.3805	-1.20485	88.5229	-0.086149
10.746	119.756	12.38	-1.20393	88.5193	-0.0860831
10.7543	119.841	12.3795	-1.20302	88.5154	-0.086018
10.7627	119.921	12.379	-1.20214	88.5116	-0.0859551
10.771	120	12.3784	-1.20125	88.5078	-0.0858912
10.7793	120.092	12.3779	-1.20031	88.504	-0.0858238
10.7877	120.172	12.3774	-1.19941	88.5002	-0.08576
10.796	120.263	12.3768	-1.19859	88.4964	-0.085701
10.8043	120.342	12.3763	-1.19775	88.4927	-0.085641
10.8127	120.427	12.3758	-1.1969	88.4891	-0.0855799
10.821	120.512	12.3753	-1.19607	88.4853	-0.0855206
10.8293	120.601	12.3748	-1.19522	88.4815	-0.0854604
10.8377	120.683	12.3742	-1.19439	88.4777	-0.0854006
10.846	120.766	12.3737	-1.19353	88.474	-0.0853395
10.8543	120.85	12.3732	-1.1927	88.4702	-0.0852796
10.8627	120.937	12.3727	-1.1919	88.4665	-0.0852231
10.871	121.016	12.3721	-1.19107	88.4627	-0.0851635
10.8793	121.108	12.3716	-1.19022	88.459	-0.0851025
10.8877	121.191	12.3711	-1.18936	88.4551	-0.0850413
10.896	121.273	12.3705	-1.18852	88.4514	-0.0849808
10.9043	121.359	12.3701	-1.18766	88.4478	-0.0849196
10.9127	121.442	12.3695	-1.18681	88.4441	-0.0848592
10.921	121.525	12.369	-1.18595	88.4403	-0.0847972
10.9293	121.613	12.3685	-1.18508	88.4365	-0.0847351
10.9377	121.698	12.3679	-1.18425	88.4327	-0.0846756
10.946	121.78	12.3674	-1.1834	88.429	-0.0846152
10.9543	121.867	12.3669	-1.18258	88.4252	-0.0845564
10.9627	121.945	12.3664	-1.18172	88.4214	-0.0844952
10.971	122.035	12.3658	-1.1809	88.4177	-0.0844365
10.9793	122.117	12.3653	-1.18009	88.4139	-0.0843785
10.9877	122.202	12.3648	-1.17927	88.4104	-0.0843198
10.996	122.286	12.3643	-1.17848	88.4067	-0.0842629
11.0043	122.373	12.3638	-1.17767	88.403	-0.0842053
11.0127	122.455	12.3633	-1.17688	88.3992	-0.0841487
11.021	122.544	12.3627	-1.17607	88.3955	-0.0840906
11.0293	122.624	12.3622	-1.17523	88.3917	-0.084031
11.0377	122.708	12.3617	-1.17442	88.388	-0.0839727
11.046	122.789	12.3612	-1.17362	88.3843	-0.0839157
11.0543	122.874	12.3606	-1.17281	88.3806	-0.0838574
11.0627	122.956	12.3601	-1.17198	88.3768	-0.0837984
11.071	123.038	12.3596	-1.17116	88.3731	-0.0837398
11.0793	123.125	12.3591	-1.17035	88.3693	-0.0836818
11.0877	123.21	12.3585	-1.16957	88.3655	-0.0836264
11.096	123.297	12.358	-1.16876	88.3619	-0.0835684
11.1043	123.381	12.3575	-1.16794	88.3583	-0.0835094
11.1127	123.466	12.357	-1.16717	88.3547	-0.0834542
11.121	123.548	12.3565	-1.16637	88.3511	-0.0833972
11.1293	123.632	12.356	-1.16561	88.3472	-0.0833427
11.1377	123.715	12.3555	-1.16483	88.3437	-0.0832874
11.146	123.8	12.355	-1.16409	88.34	-0.0832341
11.1543	123.881	12.3545	-1.16332	88.3364	-0.0831794
11.1627	123.963	12.354	-1.16255	88.3328	-0.0831244
11.171	124.051	12.3535	-1.16177	88.3293	-0.0830685
11.1793	124.134	12.3529	-1.161	88.3254	-0.0830133
11.1877	124.222	12.3524	-1.16027	88.3218	-0.0829608
11.196	124.308	12.352	-1.1595	88.3184	-0.0829063
11.2043	124.388	12.3514	-1.15879	88.3146	-0.0828553
11.2127	124.477	12.3509	-1.15803	88.3111	-0.0828009
11.221	124.559	12.3504	-1.15726	88.3076	-0.0827462
11.2293	124.645	12.3499	-1.15646	88.3041	-0.0826887
11.2377	124.732	12.3494	-1.15568	88.3005	-0.0826333
11.246	124.816	12.349	-1.15488	88.297	-0.0825754
11.2543	124.897	12.3485	-1.15412	88.2936	-0.0825211
11.2627	124.981	12.348	-1.1534	88.2901	-0.0824698
11.271	125.065	12.3475	-1.15266	88.2868	-0.0824168
11.2793	125.148	12.347	-1.15192	88.2832	-0.0823639
11.2877	125.236	12.3466	-1.15114	88.28	-0.0823086
11.296	125.315	12.3461	-1.15038	88.2765	-0.0822537
11.3043	125.397	12.3456	-1.14964	88.2728	-0.0822012
11.3127	125.489	12.3451	-1.14892	88.2692	-0.08215
11.321	125.574	12.3446	-1.14824	88.2657	-0.0821008
11.3293	125.653	12.344	-1.14755	88.2619	-0.0820514
11.3377	125.735	12.3435	-1.14682	88.2583	-0.0819995
11.346	125.824	12.3431	-1.14609	88.2549	-0.0819471
11.3543	125.906	12.3425	-1.14536	88.2511	-0.0818954
11.3627	125.99	12.342	-1.14463	88.2474	-0.081843
11.371	126.071	12.3415	-1.14387	88.2438	-0.0817883
11.3793	126.154	12.341	-1.14314	88.2403	-0.0817362
11.3877	126.24	12.3405	-1.14245	88.2366	-0.081687
11.396	126.325	12.34	-1.14174	88.2331	-0.0816361
11.4043	126.402	12.3395	-1.14102	88.2295	-0.0815845
11.4127	126.491	12.339	-1.14031	88.226	-0.0815337
11.421	126.572	12.3385	-1.13959	88.2225	-0.0814824
11.4293	126.662	12.338	-1.13889	88.2188	-0.0814323
11.4377	126.743	12.3375	-1.13816	88.2152	-0.08138
11.446	126.828	12.337	-1.13743	88.2118	-0.0813284
11.4543	126.91	12.3366	-1.13677	88.2083	-0.0812808
11.4627	126.996	12.3361	-1.1361	88.2047	-0.0812329
11.471	127.079	12.3356	-1.13537	88.2014	-0.0811809
11.4793	127.158	12.3351	-1.13468	88.198	-0.0811312
11.4877	127.249	12.3346	-1.13396	88.1946	-0.0810798
11.496	127.331	12.3342	-1.13326	88.1912	-0.0810299
11.5043	127.419	12.3337	-1.13256	88.1876	-0.0809796
11.5127	127.5	12.3332	-1.13185	88.1844	-0.0809289
11.521	127.585	12.3327	-1.13115	88.181	-0.0808793
11.5293	127.669	12.3323	-1.13046	88.1776	-0.0808297
11.5377	127.754	12.3318	-1.12975	88.1741	-0.0807791
11.546	127.833	12.3313	-1.12904	88.1705	-0.0807283
11.5543	127.924	12.3308	-1.12835	88.1669	-0.080679
11.5627	128.003	12.3303	-1.12764	88.1635	-0.0806282
11.571	128.094	12.3298	-1.12696	88.1601	-0.0805792
11.5793	128.169	12.3294	-1.12628	88.1569	-0.0805306
11.5877	128.261	12.3289	-1.12561	88.1536	-0.0804828
11.596	128.341	12.3284	-1.12492	88.1502	-0.0804337
11.6043	128.423	12.3279	-1.12424	88.1466	-0.0803848
11.6127	128.51	12.3275	-1.12358	88.1432	-0.080338
11.621	128.598	12.327	-1.12292	88.1399	-0.0802909
11.6293	128.677	12.3265	-1.12224	88.1365	-0.080242
11.6377	128.766	12.326	-1.12156	88.1332	-0.0801932
11.646	128.839	12.3256	-1.12089	88.1297	-0.0801457
11.6543	128.932	12.325	-1.12023	88.126	-0.0800985
11.6627	129.014	12.3245	-1.11953	88.1224	-0.080048
11.671	129.099	12.324	-1.11886	88.1189	-0.0800004
11.6793	129.177	12.3236	-1.11818	88.1154	-0.0799515
11.6877	129.258	12.3231	-1.11751	88.1121	-0.0799038
11.696	129.346	12.3226	-1.11685	88.1088	-0.0798564
11.7043	129.433	12.3222	-1.11621	88.1054	-0.0798107
11.7127	129.515	12.3217	-1.11557	88.1023	-0.079765
11.721	129.604	12.3213	-1.11493	88.099	-0.079719
11.7293	129.685	12.3208	-1.11429	88.0957	-0.0796734
11.7377	129.768	12.3204	-1.11366	88.0926	-0.0796283
11.746	129.854	12.3199	-1.11303	88.0892	-0.0795836
11.7543	129.937	12.3194	-1.11238	88.0858	-0.0795367
11.7627	130.023	12.319	-1.11174	88.0826	-0.0794913
11.771	130.109	12.3185	-1.1111	88.0793	-0.0794455
11.7793	130.189	12.318	-1.11046	88.076	-0.0793996
11.7877	130.274	12.3176	-1.10978	88.0726	-0.0793512
11.796	130.359	12.3171	-1.10912	88.0692	-0.0793037
11.8043	130.44	12.3166	-1.1085	88.0658	-0.0792592
11.8127	130.524	12.3162	-1.10783	88.0626	-0.0792119
11.821	130.606	12.3157	-1.10717	88.0593	-0.0791644
11.8293	130.692	12.3152	-1.10653	88.0559	-0.0791189
11.8377	130.777	12.3148	-1.1059	88.0528	-0.0790736
11.846	130.864	12.3143	-1.10528	88.0494	-0.0790294
11.8543	130.945	12.3138	-1.10467	88.0459	-0.0789855
11.8627	131.026	12.3134	-1.10402	88.0425	-0.0789392
11.871	131.114	12.3129	-1.10339	88.0393	-0.0788944
11.8793	131.202	12.3124	-1.10278	88.0359	-0.0788505
11.8877	131.287	12.312	-1.10215	88.0326	-0.0788052
11.896	131.365	12.3115	-1.10151	88.029	-0.0787599
11.9043	131.451	12.311	-1.10085	88.0256	-0.0787126
11.9127	131.534	12.3106	-1.10019	88.0226	-0.0786654
11.921	131.621	12.3101	-1.09957	88.0193	-0.078621
11.9293	131.705	12.3097	-1.09892	88.016	-0.0785745
11.9377	131.789	12.3092	-1.09826	88.0129	-0.0785276
11.946	131.873	12.3087	-1.09766	88.0094	-0.0784842
11.9543	131.958	12.3083	-1.09703	88.0062	-0.0784394
11.9627	132.042	12.3079	-1.0964	88.0031	-0.0783946
11.971	132.125	12.3074	-1.09576	87.9999	-0.0783488
11.9793	132.21	12.307	-1.09513	87.997	-0.0783035
11.9877	132.289	12.3066	-1.09452	87.994	-0.0782602
11.996	132.379	12.3061	-1.09393	87.9907	-0.078218
12.0043	132.455	12.3056	-1.0933	87.9873	-0.0781725
12.0127	132.543	12.3052	-1.09267	87.9842	-0.0781275
12.021	132.632	12.3048	-1.09205	87.9811	-0.0780837
12.0293	132.713	12.3044	-1.0914	87.9781	-0.0780366
12.0377	132.794	12.3039	-1.09079	87.975	-0.0779932
12.046	132.879	12.3035	-1.09014	87.9718	-0.0779468
12.0543	132.964	12.303	-1.08949	87.9686	-0.0779003
12.0627	133.049	12.3025	-1.08889	87.9651	-0.0778572
12.071	133.132	12.3021	-1.08827	87.9619	-0.0778132
12.0793	133.219	12.3017	-1.08766	87.959	-0.0777691
12.0877	133.298	12.3013	-1.08701	87.9561	-0.0777227
12.096	133.385	12.3009	-1.08638	87.9531	-0.0776778
12.1043	133.469	12.3004	-1.08576	87.95	-0.0776336
12.1127	133.553	12.3	-1.08516	87.9468	-0.0775906
12.121	133.633	12.2995	-1.0845	87.9437	-0.0775438
12.1293	133.719	12.2991	-1.08388	87.9408	-0.0774994
12.1377	133.807	12.2987	-1.08326	87.9379	-0.0774545
12.146	133.891	12.2983	-1.0826	87.9349	-0.0774079
12.1543	133.978	12.2979	-1.08195	87.9317	-0.0773612
12.1627	134.059	12.2974	-1.08128	87.9284	-0.077313
12.171	134.142	12.297	-1.08067	87.9252	-0.0772694
12.1793	134.225	12.2965	-1.08003	87.9219	-0.0772242
12.1877	134.31	12.296	-1.07936	87.9187	-0.077176
12.196	134.392	12.2956	-1.07873	87.9154	-0.0771309
12.2043	134.479	12.2951	-1.07809	87.9122	-0.0770851
12.2127	134.562	12.2947	-1.07747	87.909	-0.0770407
12.221	134.643	12.2942	-1.07687	87.9059	-0.0769981
12.2293	134.725	12.2938	-1.07629	87.9026	-0.0769563
12.2377	134.809	12.2934	-1.07567	87.8994	-0.0769124
12.246	134.894	12.2929	-1.07505	87.8963	-0.0768677
12.2543	134.982	12.2925	-1.07444	87.8932	-0.0768243
12.2627	135.061	12.292	-1.07384	87.8899	-0.0767816
12.271	135.146	12.2916	-1.07329	87.8869	-0.0767417
12.2793	135.231	12.2912	-1.07267	87.8838	-0.0766973
12.2877	135.314	12.2907	-1.0721	87.8807	-0.0766566
12.296	135.4	12.2903	-1.0715	87.8777	-0.0766137
12.3043	135.482	12.2899	-1.07088	87.8745	-0.0765694
12.3127	135.568	12.2894	-1.07027	87.8715	-0.0765261
12.321	135.649	12.289	-1.06966	87.8684	-0.0764826
12.3293	135.733	12.2886	-1.06907	87.8653	-0.0764402
12.3377	135.818	12.2881	-1.06847	87.8622	-0.0763973
12.346	135.904	12.2877	-1.06787	87.8592	-0.0763541
12.3543	135.987	12.2873	-1.06722	87.8561	-0.0763078
12.3627	136.071	12.2869	-1.06662	87.8531	-0.0762648
12.371	136.153	12.2864	-1.06599	87.8499	-0.0762199
12.3793	136.235	12.286	-1.06537	87.8467	-0.0761757
12.3877	136.326	12.2856	-1.06475	87.8438	-0.0761316
12.396	136.405	12.2851	-1.06414	87.8408	-0.0760874
12.4043	136.493	12.2847	-1.06354	87.8378	-0.076045
12.4127	136.574	12.2843	-1.06298	87.8349	-0.0760046
12.421	136.66	12.2839	-1.06236	87.8319	-0.0759606
12.4293	136.742	12.2835	-1.06176	87.8291	-0.0759174
12.4377	136.828	12.2831	-1.06118	87.8261	-0.0758759
12.446	136.909	12.2827	-1.06055	87.8232	-0.0758307
12.4543	136.996	12.2823	-1.05993	87.8203	-0.0757866
12.4627	137.075	12.2819	-1.05932	87.8173	-0.0757427
12.471	137.162	12.2814	-1.05872	87.8141	-0.0757002
12.4793	137.248	12.281	-1.05813	87.8112	-0.0756582
12.4877	137.331	12.2806	-1.05752	87.8083	-0.0756146
12.496	137.414	12.2802	-1.05689	87.8052	-0.0755693
12.5043	137.501	12.2797	-1.05631	87.8021	-0.075528
12.5127	137.586	12.2793	-1.05571	87.7989	-0.0754849
12.521	137.674	12.2789	-1.0551	87.7961	-0.0754413
12.5293	137.758	12.2785	-1.05452	87.7932	-0.0753997
12.5377	137.84	12.2781	-1.05393	87.7903	-0.0753574
12.546	137.924	12.2777	-1.05335	87.7874	-0.0753165
12.5543	138.004	12.2773	-1.05278	87.7847	-0.0752755
12.5627	138.089	12.2769	-1.05217	87.7817	-0.0752316
12.571	138.172	12.2765	-1.05159	87.7788	-0.0751907
12.5793	138.257	12.2761	-1.051	87.7759	-0.0751484
12.5877	138.343	12.2756	-1.0504	87.7728	-0.0751052
12.596	138.421	12.2752	-1.0498	87.7698	-0.0750623
12.6043	138.51	12.2748	-1.0492	87.7669	-0.0750195
12.6127	138.593	12.2744	-1.04863	87.7639	-0.0749787
12.621	138.68	12.274	-1.04804	87.761	-0.0749368
12.6293	138.76	12.2736	-1.04744	87.7581	-0.0748934
12.6377	138.847	12.2732	-1.04681	87.7551	-0.0748487
12.646	138.934	12.2727	-1.04624	87.7521	-0.0748076
12.6543	139.009	12.2723	-1.04567	87.749	-0.0747669
12.6627	139.095	12.2719	-1.04513	87.7461	-0.0747282
12.671	139.185	12.2715	-1.04454	87.7435	-0.074686
12.6793	139.265	12.2712	-1.04392	87.7408	-0.0746422
12.6877	139.347	12.2708	-1.04336	87.7379	-0.0746018
12.696	139.435	12.2704	-1.04276	87.735	-0.0745587
12.7043	139.525	12.2699	-1.04219	87.7321	-0.0745185
12.7127	139.606	12.2696	-1.04162	87.7293	-0.0744776
12.721	139.693	12.2692	-1.04104	87.7266	-0.0744364
12.7293	139.773	12.2688	-1.04045	87.7239	-0.0743941
12.7377	139.856	12.2684	-1.03987	87.7211	-0.0743521
12.746	139.939	12.268	-1.03924	87.7182	-0.0743074
12.7543	140.026	12.2676	-1.03866	87.7154	-0.0742655
12.7627	140.109	12.2672	-1.03813	87.7126	-0.0742277
12.771	140.192	12.2668	-1.03755	87.7097	-0.0741863
12.7793	140.279	12.2664	-1.03698	87.707	-0.0741459
12.7877	140.364	12.266	-1.03642	87.7042	-0.0741055
12.796	140.444	12.2657	-1.03585	87.7014	-0.0740649
12.8043	140.529	12.2653	-1.0353	87.6986	-0.0740256
12.8127	140.609	12.2649	-1.03474	87.6959	-0.0739854
12.821	140.696	12.2645	-1.0341	87.6931	-0.0739398
12.8293	140.775	12.2641	-1.03352	87.6905	-0.0738983
12.8377	140.863	12.2637	-1.03296	87.6877	-0.0738579
12.846	140.947	12.2633	-1.03239	87.6848	-0.0738174
12.8543	141.03	12.2629	-1.03186	87.682	-0.0737799
12.8627	141.116	12.2625	-1.03133	87.6792	-0.0737414
12.871	141.199	12.2621	-1.03077	87.6763	-0.0737014
12.8793	141.282	12.2617	-1.03022	87.6734	-0.0736621
12.8877	141.367	12.2613	-1.02967	87.6705	-0.0736228
12.896	141.455	12.2609	-1.02912	87.6677	-0.0735837
12.9043	141.54	12.2606	-1.02865	87.6649	-0.0735504
12.9127	141.621	12.2601	-1.02814	87.662	-0.0735134
12.921	141.704	12.2598	-1.02759	87.6593	-0.0734743
12.9293	141.791	12.2594	-1.02706	87.6565	-0.0734362
12.9377	141.87	12.259	-1.02649	87.6539	-0.073396
12.946	141.952	12.2586	-1.02591	87.6511	-0.073354
12.9543	142.045	12.2583	-1.02535	87.6485	-0.0733142
12.9627	142.123	12.2579	-1.02482	87.6458	-0.0732761
12.971	142.205	12.2575	-1.02425	87.6432	-0.0732358
12.9793	142.288	12.2571	-1.02371	87.6406	-0.073197
12.9877	142.373	12.2568	-1.02315	87.6379	-0.0731569
12.996	142.46	12.2564	-1.02262	87.6352	-0.0731188
13.0043	142.544	12.256	-1.02207	87.6322	-0.0730799
13.0127	142.629	12.2556	-1.02151	87.6295	-0.0730396
13.021	142.708	12.2552	-1.02097	87.6267	-0.0730011
13.0293	142.797	12.2548	-1.02046	87.624	-0.0729647
13.0377	142.879	12.2544	-1.01992	87.6212	-0.072926
13.046	142.967	12.254	-1.01937	87.6183	-0.0728865
13.0543	143.051	12.2536	-1.01885	87.6155	-0.0728493
13.0627	143.137	12.2532	-1.01829	87.6124	-0.0728094
13.071	143.219	12.2528	-1.01776	87.6096	-0.0727715
13.0793	143.299	12.2524	-1.0172	87.6068	-0.0727316
13.0877	143.382	12.2521	-1.01669	87.6041	-0.0726948
13.096	143.467	12.2517	-1.01615	87.6013	-0.0726567
13.1043	143.55	12.2513	-1.01562	87.5987	-0.0726187
13.1127	143.629	12.2509	-1.0151	87.596	-0.0725812
13.121	143.716	12.2505	-1.01456	87.5933	-0.0725425
13.1293	143.8	12.2502	-1.01403	87.5906	-0.0725051
13.1377	143.887	12.2498	-1.0135	87.5878	-0.0724667
13.146	143.97	12.2494	-1.01298	87.5852	-0.0724299
13.1543	144.057	12.249	-1.01241	87.5825	-0.0723889
13.1627	144.141	12.2487	-1.01188	87.5799	-0.0723513
13.171	144.222	12.2483	-1.01136	87.5773	-0.0723141
13.1793	144.305	12.2479	-1.01086	87.5747	-0.0722783
13.1877	144.387	12.2476	-1.01032	87.572	-0.0722398
13.196	144.474	12.2472	-1.00981	87.5693	-0.0722027
13.2043	144.555	12.2468	-1.00929	87.5665	-0.072166
13.2127	144.642	12.2464	-1.00874	87.5639	-0.0721268
13.221	144.728	12.2461	-1.0082	87.5613	-0.072088
13.2293	144.812	12.2457	-1.00768	87.5585	-0.0720506
13.2377	144.89	12.2453	-1.00718	87.5559	-0.0720153
13.246	144.977	12.2449	-1.00669	87.5534	-0.0719798
13.2543	145.064	12.2446	-1.00615	87.5508	-0.0719413
13.2627	145.145	12.2442	-1.00561	87.5482	-0.0719027
13.271	145.229	12.2439	-1.00509	87.5455	-0.0718653
13.2793	145.312	12.2435	-1.00455	87.5427	-0.0718267
13.2877	145.395	12.2431	-1.00406	87.5399	-0.071792
13.296	145.482	12.2427	-1.00359	87.5373	-0.0717582
13.3043	145.564	12.2423	-1.00311	87.5346	-0.0717237
13.3127	145.652	12.242	-1.00261	87.5322	-0.0716885
13.321	145.728	12.2416	-1.00212	87.5295	-0.0716533
13.3293	145.818	12.2413	-1.00161	87.527	-0.0716169
13.3377	145.899	12.2409	-1.0011	87.5244	-0.07158
13.346	145.986	12.2405	-1.0006	87.5218	-0.0715444
13.3543	146.067	12.2402	-1.0001	87.5193	-0.0715088
13.3627	146.15	12.2399	-0.999597	87.5169	-0.0714728
13.371	146.234	12.2395	-0.999061	87.5147	-0.0714345
13.3793	146.321	12.2392	-0.998527	87.5122	-0.0713963
13.3877	146.405	12.2389	-0.998018	87.5098	-0.0713599
13.396	146.487	12.2385	-0.997492	87.5072	-0.0713223
13.4043	146.573	12.2381	-0.996957	87.5047	-0.071284
13.4127	146.653	12.2378	-0.996434	87.5019	-0.0712466
13.421	146.74	12.2374	-0.995959	87.4993	-0.0712127
13.4293	146.825	12.237	-0.995476	87.4967	-0.0711781
13.4377	146.905	12.2366	-0.994982	87.494	-0.0711428
13.446	146.993	12.2363	-0.994474	87.4914	-0.0711065
13.4543	147.074	12.2359	-0.993968	87.4888	-0.0710703
13.4627	147.156	12.2356	-0.993503	87.4864	-0.071037
13.471	147.244	12.2352	-0.993012	87.4836	-0.071002
13.4793	147.326	12.2348	-0.992542	87.4811	-0.0709684
13.4877	147.411	12.2345	-0.992064	87.4786	-0.0709342
13.496	147.493	12.2341	-0.991586	87.4761	-0.0709
13.5043	147.575	12.2338	-0.991104	87.4736	-0.0708655
13.5127	147.661	12.2334	-0.990596	87.4711	-0.0708292
13.521	147.746	12.2331	-0.990096	87.4686	-0.0707934
13.5293	147.83	12.2327	-0.989612	87.466	-0.0707589
13.5377	147.914	12.2324	-0.989133	87.4633	-0.0707246
13.546	147.999	12.232	-0.988641	87.4608	-0.0706894
13.5543	148.081	12.2316	-0.988146	87.4582	-0.0706541
13.5627	148.164	12.2313	-0.987622	87.4555	-0.0706166
13.571	148.248	12.2309	-0.987131	87.453	-0.0705815
13.5793	148.336	12.2306	-0.986658	87.4505	-0.0705477
13.5877	148.419	12.2302	-0.986141	87.4479	-0.0705107
13.596	148.501	12.2299	-0.985657	87.4455	-0.0704761
13.6043	148.584	12.2295	-0.985176	87.443	-0.0704417
13.6127	148.669	12.2292	-0.984682	87.4404	-0.0704063
13.621	148.753	12.2288	-0.98418	87.4382	-0.0703705
13.6293	148.837	12.2285	-0.983677	87.4357	-0.0703345
13.6377	148.917	12.2282	-0.983174	87.4333	-0.0702985
13.646	149.005	12.2278	-0.982684	87.4309	-0.0702635
13.6543	149.086	12.2275	-0.982169	87.4283	-0.0702266
13.6627	149.173	12.2271	-0.981622	87.4257	-0.0701876
13.671	149.254	12.2268	-0.981114	87.4233	-0.0701512
13.6793	149.34	12.2264	-0.980589	87.4209	-0.0701137
13.6877	149.427	12.2261	-0.980068	87.4183	-0.0700764
13.696	149.508	12.2257	-0.979561	87.4159	-0.0700402
13.7043	149.594	12.2254	-0.979075	87.4132	-0.0700054
13.7127	149.672	12.225	-0.97857	87.4107	-0.0699693
13.721	149.758	12.2246	-0.978071	87.4081	-0.0699337
13.7293	149.839	12.2243	-0.977572	87.4058	-0.0698979
13.7377	149.927	12.224	-0.977096	87.4034	-0.0698639
13.746	150.012	12.2236	-0.976645	87.401	-0.0698317
13.7543	150.097	12.2233	-0.976174	87.3985	-0.069798
13.7627	150.182	12.223	-0.97571	87.3961	-0.0697648
13.771	150.265	12.2226	-0.975249	87.3938	-0.0697319
13.7793	150.352	12.2223	-0.974773	87.3914	-0.0696979
13.7877	150.434	12.222	-0.974269	87.3891	-0.0696618
13.796	150.517	12.2216	-0.973767	87.3867	-0.0696259
13.8043	150.602	12.2213	-0.973277	87.3845	-0.0695909
13.8127	150.683	12.221	-0.972781	87.3822	-0.0695554
13.821	150.769	12.2207	-0.972283	87.3798	-0.0695198
13.8293	150.85	12.2203	-0.971751	87.3773	-0.0694818
13.8377	150.934	12.22	-0.971267	87.3749	-0.0694471
13.846	151.019	12.2196	-0.970754	87.3724	-0.0694105
13.8543	151.104	12.2193	-0.970234	87.37	-0.0693733
13.8627	151.186	12.219	-0.969761	87.3676	-0.0693395
13.871	151.272	12.2186	-0.969273	87.3652	-0.0693045
13.8793	151.353	12.2183	-0.968789	87.3628	-0.06927
13.8877	151.439	12.2179	-0.968317	87.3602	-0.0692362
13.896	151.525	12.2176	-0.967878	87.3577	-0.0692048
13.9043	151.609	12.2173	-0.967408	87.3554	-0.0691712
13.9127	151.693	12.2169	-0.966969	87.3531	-0.0691398
13.921	151.779	12.2166	-0.966457	87.3508	-0.0691033
13.9293	151.858	12.2163	-0.965954	87.3485	-0.0690673
13.9377	151.945	12.216	-0.96548	87.3461	-0.0690334
13.946	152.026	12.2156	-0.964957	87.3435	-0.068996
13.9543	152.111	12.2152	-0.964484	87.341	-0.0689621
13.9627	152.197	12.2149	-0.963998	87.3384	-0.0689274
13.971	152.275	12.2145	-0.963511	87.336	-0.0688926
13.9793	152.362	12.2142	-0.963023	87.3337	-0.0688577
13.9877	152.446	12.2139	-0.962547	87.3311	-0.0688236
13.996	152.53	12.2135	-0.962041	87.3286	-0.0687875
14.0043	152.607	12.2132	-0.961571	87.3262	-0.0687539
14.0127	152.699	12.2128	-0.961132	87.3237	-0.0687225
14.021	152.782	12.2125	-0.960661	87.3214	-0.0686888
14.0293	152.869	12.2122	-0.960182	87.3192	-0.0686545
14.0377	152.948	12.2119	-0.959676	87.317	-0.0686184
14.046	153.035	12.2116	-0.959176	87.3148	-0.0685826
14.0543	153.117	12.2113	-0.958688	87.3125	-0.0685477
14.0627	153.204	12.2109	-0.958186	87.31	-0.0685118
14.071	153.289	12.2106	-0.957701	87.3079	-0.0684772
14.0793	153.371	12.2103	-0.95723	87.3056	-0.0684435
14.0877	153.452	12.21	-0.956749	87.3032	-0.0684091
14.096	153.539	12.2097	-0.956242	87.3011	-0.0683728
14.1043	153.624	12.2093	-0.955729	87.2987	-0.0683362
14.1127	153.704	12.209	-0.955235	87.2965	-0.0683008
14.121	153.788	12.2087	-0.954752	87.294	-0.0682663
14.1293	153.873	12.2084	-0.95431	87.2917	-0.0682347
14.1377	153.959	12.208	-0.953854	87.2894	-0.0682021
14.146	154.047	12.2078	-0.953375	87.2874	-0.0681679
14.1543	154.128	12.2074	-0.95286	87.2849	-0.068131
14.1627	154.209	12.2071	-0.952344	87.2826	-0.0680941
14.171	154.293	12.2068	-0.951854	87.2804	-0.0680591
14.1793	154.378	12.2064	-0.951378	87.278	-0.068025
14.1877	154.462	12.2061	-0.950923	87.2756	-0.0679925
14.196	154.546	12.2058	-0.950472	87.2732	-0.0679602
14.2043	154.623	12.2055	-0.95001	87.2711	-0.0679272
14.2127	154.714	12.2051	-0.949526	87.2687	-0.0678926
14.221	154.794	12.2048	-0.949013	87.2664	-0.0678559
14.2293	154.882	12.2045	-0.948521	87.264	-0.0678208
14.2377	154.962	12.2042	-0.948055	87.2617	-0.0677875
14.246	155.046	12.2039	-0.947593	87.2597	-0.0677544
14.2543	155.131	12.2036	-0.947098	87.2575	-0.067719
14.2627	155.213	12.2033	-0.946647	87.2554	-0.0676868
14.271	155.297	12.203	-0.946181	87.2532	-0.0676534
14.2793	155.387	12.2027	-0.94573	87.251	-0.0676212
14.2877	155.466	12.2024	-0.945253	87.2488	-0.0675871
14.296	155.553	12.2021	-0.944752	87.2467	-0.0675513
14.3043	155.629	12.2018	-0.944298	87.2445	-0.0675188
14.3127	155.718	12.2014	-0.943829	87.2423	-0.0674853
14.321	155.803	12.2012	-0.943369	87.2402	-0.0674524
14.3293	155.883	12.2008	-0.942905	87.2378	-0.0674192
14.3377	155.969	12.2005	-0.942435	87.2355	-0.0673856
14.346	156.056	12.2002	-0.941932	87.2331	-0.0673497
14.3543	156.135	12.1998	-0.941446	87.2308	-0.0673149
14.3627	156.221	12.1995	-0.940945	87.2285	-0.0672791
14.371	156.308	12.1992	-0.940489	87.2263	-0.0672465
14.3793	156.39	12.1989	-0.940061	87.2242	-0.0672159
14.3877	156.474	12.1986	-0.939583	87.2219	-0.0671817
14.396	156.556	12.1983	-0.939138	87.2195	-0.0671499
14.4043	156.639	12.1979	-0.938678	87.2172	-0.067117
14.4127	156.727	12.1976	-0.938223	87.2149	-0.0670844
14.421	156.809	12.1973	-0.937801	87.2127	-0.0670543
14.4293	156.89	12.197	-0.937348	87.2107	-0.0670219
14.4377	156.978	12.1967	-0.936882	87.2086	-0.0669886
14.446	157.061	12.1964	-0.936461	87.2065	-0.0669585
14.4543	157.145	12.1962	-0.936021	87.2045	-0.066927
14.4627	157.226	12.1959	-0.935551	87.2023	-0.0668934
14.471	157.311	12.1956	-0.935108	87.2002	-0.0668617
14.4793	157.394	12.1953	-0.934625	87.1984	-0.0668272
14.4877	157.478	12.195	-0.934182	87.1965	-0.0667955
14.496	157.564	12.1948	-0.933731	87.1944	-0.0667633
14.5043	157.648	12.1944	-0.933275	87.1922	-0.0667307
14.5127	157.731	12.1941	-0.932843	87.19	-0.0666998
14.521	157.816	12.1938	-0.932429	87.1878	-0.0666702
14.5293	157.899	12.1935	-0.931978	87.1856	-0.0666379
14.5377	157.983	12.1932	-0.931557	87.1833	-0.0666078
14.546	158.069	12.1929	-0.931113	87.1812	-0.066576
14.5543	158.155	12.1926	-0.930663	87.179	-0.0665439
14.5627	158.237	12.1923	-0.930247	87.1768	-0.0665142
14.571	158.317	12.192	-0.929789	87.1746	-0.0664814
14.5793	158.402	12.1917	-0.929332	87.1726	-0.0664487
14.5877	158.487	12.1914	-0.928862	87.1705	-0.0664151
14.596	158.571	12.1911	-0.928423	87.1683	-0.0663837
14.6043	158.657	12.1908	-0.927957	87.1662	-0.0663504
14.6127	158.74	12.1905	-0.927487	87.1642	-0.0663168
14.621	158.821	12.1902	-0.927014	87.1622	-0.066283
14.6293	158.91	12.1899	-0.92657	87.1599	-0.0662513
14.6377	158.991	12.1896	-0.92613	87.1579	-0.0662197
14.646	159.078	12.1893	-0.925636	87.1558	-0.0661845
14.6543	159.162	12.189	-0.925184	87.1537	-0.0661522
14.6627	159.243	12.1887	-0.924738	87.1514	-0.0661202
14.671	159.329	12.1884	-0.924294	87.1492	-0.0660885
14.6793	159.411	12.1881	-0.923827	87.1472	-0.0660551
14.6877	159.496	12.1878	-0.923362	87.1449	-0.0660219
14.696	159.579	12.1875	-0.922924	87.1427	-0.0659905
14.7043	159.665	12.1872	-0.922482	87.1407	-0.065959
14.7127	159.748	12.187	-0.922042	87.1387	-0.0659275
14.721	159.831	12.1867	-0.9216	87.1366	-0.0658959
14.7293	159.913	12.1863	-0.921194	87.1344	-0.0658669
14.7377	159.998	12.186	-0.920771	87.132	-0.0658366
14.746	160.08	12.1857	-0.92034	87.13	-0.0658058
14.7543	160.171	12.1855	-0.919918	87.1281	-0.0657756
14.7627	160.249	12.1852	-0.919499	87.126	-0.0657457
14.771	160.332	12.1849	-0.919104	87.1239	-0.0657174
14.7793	160.419	12.1846	-0.918655	87.1218	-0.0656853
14.7877	160.504	12.1843	-0.918222	87.1198	-0.0656544
14.796	160.587	12.184	-0.917791	87.1178	-0.0656235
14.8043	160.67	12.1838	-0.917368	87.1158	-0.0655933
14.8127	160.757	12.1835	-0.916947	87.1139	-0.0655632
14.821	160.844	12.1832	-0.916513	87.112	-0.0655321
14.8293	160.928	12.1829	-0.916091	87.1098	-0.065502
14.8377	161.006	12.1826	-0.915702	87.1078	-0.0654741
14.846	161.094	12.1823	-0.915301	87.1058	-0.0654455
14.8543	161.174	12.1821	-0.914872	87.1038	-0.0654148
14.8627	161.263	12.1818	-0.914471	87.1017	-0.0653862
14.871	161.346	12.1815	-0.914048	87.0994	-0.0653559
14.8793	161.427	12.1812	-0.913644	87.0973	-0.065327
14.8877	161.511	12.1809	-0.913228	87.0952	-0.0652973
14.896	161.594	12.1806	-0.912821	87.0931	-0.0652682
14.9043	161.679	12.1803	-0.912426	87.0912	-0.0652399
14.9127	161.759	12.1801	-0.912014	87.0894	-0.0652105
14.921	161.845	12.1798	-0.911586	87.0872	-0.0651799
14.9293	161.929	12.1795	-0.91117	87.0852	-0.0651501
14.9377	162.011	12.1792	-0.910765	87.0832	-0.0651212
14.946	162.097	12.1789	-0.910357	87.0812	-0.065092
14.9543	162.178	12.1786	-0.909956	87.0793	-0.0650633
14.9627	162.263	12.1784	-0.909545	87.0773	-0.0650339
14.971	162.347	12.1781	-0.909129	87.075	-0.0650042
14.9793	162.433	12.1778	-0.908687	87.073	-0.0649726
14.9877	162.514	12.1775	-0.908255	87.0709	-0.0649417
14.996	162.6	12.1771	-0.90784	87.0686	-0.064912
15.0043	162.682	12.1769	-0.907432	87.0666	-0.0648829
15.0127	162.767	12.1766	-0.907005	87.0645	-0.0648523
15.021	162.855	12.1763	-0.906592	87.0624	-0.0648228
15.0293	162.934	12.176	-0.906187	87.0606	-0.0647938
15.0377	163.022	12.1757	-0.905764	87.0584	-0.0647636
15.046	163.105	12.1754	-0.905322	87.0564	-0.064732
15.0543	163.188	12.1752	-0.904892	87.0546	-0.0647012
15.0627	163.271	12.1749	-0.904508	87.0526	-0.0646738
15.071	163.357	12.1746	-0.904117	87.0505	-0.0646458
15.0793	163.437	12.1744	-0.903694	87.0488	-0.0646156
15.0877	163.525	12.1741	-0.903275	87.0468	-0.0645856
15.096	163.609	12.1738	-0.902846	87.0447	-0.0645549
15.1043	163.689	12.1736	-0.902406	87.0428	-0.0645235
15.1127	163.775	12.1732	-0.901975	87.0405	-0.0644926
15.121	163.859	12.1729	-0.901527	87.0385	-0.0644606
15.1293	163.942	12.1726	-0.901118	87.0363	-0.0644314
15.1377	164.022	12.1724	-0.900725	87.0343	-0.0644033
15.146	164.108	12.1721	-0.900323	87.0323	-0.0643745
15.1543	164.191	12.1718	-0.899886	87.0304	-0.0643433
15.1627	164.278	12.1715	-0.89949	87.0283	-0.064315
15.171	164.36	12.1713	-0.899053	87.0264	-0.0642838
15.1793	164.442	12.171	-0.898661	87.0246	-0.0642557
15.1877	164.528	12.1707	-0.898272	87.0225	-0.0642279
15.196	164.614	12.1704	-0.897848	87.0205	-0.0641975
15.2043	164.697	12.1702	-0.897459	87.0187	-0.0641698
15.2127	164.778	12.1699	-0.897044	87.0169	-0.0641401
15.221	164.864	12.1697	-0.896637	87.0151	-0.064111
15.2293	164.952	12.1694	-0.896216	87.0133	-0.0640809
15.2377	165.032	12.1692	-0.895799	87.0114	-0.0640511
15.246	165.116	12.1689	-0.895373	87.0094	-0.0640206
15.2543	165.199	12.1686	-0.894982	87.0073	-0.0639926
15.2627	165.282	12.1683	-0.894561	87.0054	-0.0639625
15.271	165.367	12.1681	-0.894149	87.0037	-0.0639331
15.2793	165.45	12.1678	-0.893781	87.0019	-0.0639068
15.2877	165.538	12.1676	-0.893376	87	-0.0638778
15.296	165.618	12.1673	-0.892991	86.998	-0.0638503
15.3043	165.703	12.167	-0.892593	86.9959	-0.0638218
15.3127	165.784	12.1667	-0.89218	86.9937	-0.0637923
15.321	165.87	12.1664	-0.891784	86.9919	-0.063764
15.3293	165.957	12.1662	-0.891398	86.9901	-0.0637364
15.3377	166.042	12.1659	-0.891006	86.9883	-0.0637084
15.346	166.13	12.1656	-0.890608	86.9863	-0.0636799
15.3543	166.209	12.1654	-0.890194	86.9842	-0.0636503
15.3627	166.288	12.1651	-0.889752	86.9823	-0.0636187
15.371	166.374	12.1648	-0.889363	86.9801	-0.0635909
15.3793	166.457	12.1645	-0.88894	86.9782	-0.0635607
15.3877	166.544	12.1642	-0.888518	86.9763	-0.0635305
15.396	166.623	12.164	-0.88812	86.9744	-0.063502
15.4043	166.709	12.1637	-0.887741	86.9726	-0.0634749
15.4127	166.795	12.1634	-0.887336	86.9706	-0.0634459
15.421	166.879	12.1632	-0.886924	86.9687	-0.0634165
15.4293	166.96	12.1629	-0.886514	86.9666	-0.0633872
15.4377	167.045	12.1626	-0.886108	86.9646	-0.0633582
15.446	167.124	12.1623	-0.885731	86.9627	-0.0633312
15.4543	167.212	12.1621	-0.885312	86.961	-0.0633012
15.4627	167.298	12.1618	-0.884919	86.9591	-0.0632731
15.471	167.381	12.1616	-0.884541	86.9572	-0.0632461
15.4793	167.469	12.1613	-0.884137	86.9554	-0.0632172
15.4877	167.544	12.1611	-0.883732	86.9535	-0.0631883
15.496	167.627	12.1608	-0.883369	86.9515	-0.0631623
15.5043	167.716	12.1605	-0.882982	86.9498	-0.0631346
15.5127	167.8	12.1603	-0.882606	86.948	-0.0631078
15.521	167.885	12.16	-0.882219	86.9462	-0.0630801
15.5293	167.964	12.1598	-0.881842	86.9443	-0.0630531
15.5377	168.05	12.1595	-0.881472	86.9424	-0.0630267
15.546	168.133	12.1592	-0.881091	86.9405	-0.0629994
15.5543	168.215	12.159	-0.880693	86.9388	-0.062971
15.5627	168.302	12.1587	-0.880331	86.9369	-0.0629451
15.571	168.384	12.1585	-0.879944	86.9349	-0.0629174
15.5793	168.47	12.1582	-0.879545	86.9332	-0.0628889
15.5877	168.555	12.158	-0.879178	86.9314	-0.0628627
15.596	168.628	12.1577	-0.87883	86.9296	-0.0628378
15.6043	168.715	12.1575	-0.878437	86.9278	-0.0628096
15.6127	168.8	12.1572	-0.878018	86.926	-0.0627797
15.621	168.883	12.157	-0.877606	86.9244	-0.0627502
15.6293	168.965	12.1567	-0.87722	86.9224	-0.0627227
15.6377	169.05	12.1564	-0.876827	86.9205	-0.0626946
15.646	169.135	12.1562	-0.876426	86.9187	-0.0626659
15.6543	169.222	12.1559	-0.876038	86.9169	-0.0626381
15.6627	169.303	12.1557	-0.87561	86.9149	-0.0626076
15.671	169.39	12.1554	-0.875166	86.9128	-0.0625758
15.6793	169.474	12.1551	-0.874725	86.9108	-0.0625443
15.6877	169.557	12.1548	-0.874342	86.9091	-0.0625169
15.696	169.641	12.1546	-0.873976	86.9072	-0.0624907
15.7043	169.727	12.1543	-0.873616	86.9053	-0.062465
15.7127	169.809	12.154	-0.87323	86.9033	-0.0624373
15.721	169.892	12.1538	-0.872833	86.9015	-0.062409
15.7293	169.98	12.1535	-0.872433	86.8998	-0.0623804
15.7377	170.061	12.1533	-0.87203	86.8978	-0.0623515
15.746	170.142	12.1531	-0.871668	86.8963	-0.0623257
15.7543	170.224	12.1528	-0.871301	86.8947	-0.0622994
15.7627	170.307	12.1526	-0.870941	86.893	-0.0622737
15.771	170.395	12.1523	-0.870571	86.891	-0.0622472
15.7793	170.483	12.1521	-0.870177	86.8893	-0.062219
15.7877	170.56	12.1518	-0.869787	86.8874	-0.0621911
15.796	170.644	12.1516	-0.869414	86.8856	-0.0621645
15.8043	170.729	12.1513	-0.869051	86.8837	-0.0621386
15.8127	170.813	12.151	-0.86866	86.8817	-0.0621106
15.821	170.898	12.1508	-0.868286	86.88	-0.0620839
15.8293	170.981	12.1505	-0.867897	86.878	-0.062056
15.8377	171.064	12.1503	-0.867516	86.8765	-0.0620288
15.846	171.148	12.15	-0.867106	86.8747	-0.0619995
15.8543	171.228	12.1498	-0.866706	86.8729	-0.0619708
15.8627	171.314	12.1495	-0.866333	86.871	-0.0619442
15.871	171.397	12.1493	-0.865938	86.8694	-0.061916
15.8793	171.48	12.1491	-0.865533	86.8677	-0.061887
15.8877	171.565	12.1488	-0.865152	86.866	-0.0618597
15.896	171.647	12.1486	-0.864795	86.8644	-0.0618342
15.9043	171.732	12.1484	-0.864412	86.8627	-0.0618069
15.9127	171.816	12.1481	-0.864039	86.861	-0.0617802
15.921	171.901	12.1479	-0.863688	86.8591	-0.0617551
15.9293	171.986	12.1476	-0.863329	86.8573	-0.0617294
15.9377	172.067	12.1473	-0.862984	86.8554	-0.0617047
15.946	172.15	12.1471	-0.862607	86.8537	-0.0616778
15.9543	172.234	12.1469	-0.862215	86.8521	-0.0616497
15.9627	172.321	12.1466	-0.861839	86.8504	-0.0616229
15.971	172.402	12.1464	-0.861462	86.8486	-0.0615959
15.9793	172.485	12.1461	-0.861111	86.8469	-0.0615708
15.9877	172.564	12.1459	-0.860761	86.8453	-0.0615458
15.996	172.653	12.1457	-0.860383	86.8434	-0.0615188
16.0043	172.739	12.1454	-0.860022	86.8418	-0.061493
16.0127	172.822	12.1452	-0.859656	86.8402	-0.0614668
16.021	172.904	12.145	-0.859292	86.8387	-0.0614408
16.0293	172.988	12.1447	-0.858935	86.8368	-0.0614152
16.0377	173.071	12.1445	-0.858578	86.835	-0.0613897
16.046	173.157	12.1442	-0.858213	86.8331	-0.0613636
16.0543	173.244	12.144	-0.85783	86.8314	-0.0613362
16.0627	173.324	12.1437	-0.857446	86.8295	-0.0613088
16.071	173.409	12.1435	-0.857048	86.8278	-0.0612803
16.0793	173.494	12.1433	-0.856676	86.8262	-0.0612537
16.0877	173.575	12.143	-0.856286	86.8243	-0.0612258
16.096	173.656	12.1427	-0.855894	86.8224	-0.0611978
16.1043	173.746	12.1425	-0.85551	86.8205	-0.0611703
16.1127	173.826	12.1423	-0.855132	86.819	-0.0611433
16.121	173.912	12.142	-0.854781	86.8172	-0.0611182
16.1293	173.994	12.1418	-0.85442	86.8155	-0.0610924
16.1377	174.076	12.1415	-0.854074	86.8138	-0.0610676
16.146	174.161	12.1413	-0.853697	86.8121	-0.0610407
16.1543	174.247	12.141	-0.853375	86.8101	-0.0610177
16.1627	174.333	12.1407	-0.853047	86.8081	-0.0609942
16.171	174.414	12.1405	-0.852675	86.8062	-0.0609676
16.1793	174.499	12.1402	-0.852327	86.8047	-0.0609427
16.1877	174.581	12.14	-0.85198	86.8031	-0.0609179
16.196	174.662	12.1398	-0.851611	86.8014	-0.0608916
16.2043	174.747	12.1396	-0.851246	86.7999	-0.0608655
16.2127	174.828	12.1393	-0.850894	86.7982	-0.0608403
16.221	174.91	12.1391	-0.850528	86.7966	-0.0608141
16.2293	174.995	12.1389	-0.850172	86.795	-0.0607886
16.2377	175.083	12.1387	-0.84979	86.7934	-0.0607613
16.246	175.169	12.1385	-0.849391	86.7919	-0.0607328
16.2543	175.25	12.1382	-0.849021	86.7902	-0.0607063
16.2627	175.333	12.138	-0.848677	86.7886	-0.0606818
16.271	175.419	12.1378	-0.848305	86.7869	-0.0606552
16.2793	175.502	12.1375	-0.847948	86.7851	-0.0606296
16.2877	175.585	12.1372	-0.847596	86.7832	-0.0606044
16.296	175.666	12.137	-0.84724	86.7816	-0.060579
16.3043	175.752	12.1368	-0.846893	86.7802	-0.0605542
16.3127	175.836	12.1366	-0.846546	86.7784	-0.0605294
16.321	175.915	12.1363	-0.846214	86.7766	-0.0605057
16.3293	176.003	12.1361	-0.84588	86.7751	-0.0604817
16.3377	176.081	12.1359	-0.845531	86.7736	-0.0604568
16.346	176.168	12.1356	-0.845169	86.7718	-0.0604309
16.3543	176.254	12.1354	-0.844799	86.7703	-0.0604045
16.3627	176.34	12.1352	-0.844436	86.7686	-0.0603785
16.371	176.424	12.1349	-0.844084	86.7668	-0.0603533
16.3793	176.504	12.1347	-0.843712	86.765	-0.0603268
16.3877	176.588	12.1344	-0.843338	86.7631	-0.0603
16.396	176.672	12.1342	-0.842949	86.7616	-0.0602722
16.4043	176.755	12.134	-0.842568	86.7603	-0.0602449
16.4127	176.84	12.1338	-0.842192	86.7586	-0.0602181
16.421	176.925	12.1336	-0.841836	86.757	-0.0601926
16.4293	177.012	12.1334	-0.841465	86.7555	-0.0601661
16.4377	177.093	12.1331	-0.841108	86.7538	-0.0601405
16.446	177.178	12.1329	-0.840744	86.7523	-0.0601145
16.4543	177.263	12.1327	-0.840381	86.7508	-0.0600886
16.4627	177.341	12.1325	-0.840041	86.7492	-0.0600643
16.471	177.43	12.1323	-0.839684	86.7475	-0.0600387
16.4793	177.51	12.132	-0.839341	86.7457	-0.0600143
16.4877	177.601	12.1318	-0.839007	86.744	-0.0599903
16.496	177.683	12.1315	-0.838691	86.7422	-0.0599677
16.5043	177.767	12.1313	-0.838389	86.7405	-0.0599462
16.5127	177.846	12.131	-0.838065	86.7387	-0.059923
16.521	177.929	12.1308	-0.837726	86.737	-0.0598987
16.5293	178.008	12.1305	-0.837402	86.7354	-0.0598756
16.5377	178.094	12.1303	-0.837074	86.7337	-0.0598521
16.546	178.179	12.1301	-0.836748	86.7323	-0.0598288
16.5543	178.262	12.1299	-0.836421	86.7308	-0.0598054
16.5627	178.345	12.1297	-0.836083	86.7292	-0.0597813
16.571	178.431	12.1295	-0.835708	86.7276	-0.0597545
16.5793	178.514	12.1292	-0.835366	86.7259	-0.05973
16.5877	178.601	12.129	-0.834985	86.7244	-0.0597028
16.596	178.678	12.1288	-0.834623	86.7226	-0.0596769
16.6043	178.765	12.1285	-0.834275	86.7209	-0.059652
16.6127	178.848	12.1283	-0.833926	86.7191	-0.0596271
16.621	178.932	12.128	-0.833575	86.7175	-0.0596019
16.6293	179.018	12.1278	-0.833224	86.7157	-0.0595768
16.6377	179.102	12.1276	-0.832876	86.7142	-0.059552
16.646	179.183	12.1274	-0.832541	86.7126	-0.059528
[truncated: 9,899 more rows]
