# Supplementary material for: Comparative study on mechanisms for improving mechanical properties and microstructure of cement paste modified by different types of nanomaterials
Source: publisher site journal article supplement (doi:10.1515/ntrev-2021-0027), 2021-01-01
Supplement: Supplementary file 14 [file NS-6-28d.xlsx]

## Sheet: Sheet1
Time (min)	Temperature (°C)	Weight (mg)			Temperature Difference (°C/mg)
0.00226667	21.4845	12.6318	-0.611257	100	-0.0483904
0.00433333	21.5415	12.6318	-0.611824	99.9998	-0.0484353
0.0126667	21.5929	12.6317	-0.611906	99.999	-0.0484417
0.021	21.6468	12.6316	-0.612083	99.9983	-0.0484558
0.0293333	21.6975	12.6315	-0.612312	99.9978	-0.0484739
0.0376667	21.7475	12.6314	-0.612603	99.997	-0.048497
0.046	21.7995	12.6313	-0.612968	99.996	-0.0485258
0.0543333	21.85	12.6311	-0.613418	99.9946	-0.0485615
0.0626667	21.9053	12.6309	-0.613931	99.9926	-0.048602
0.071	21.9521	12.6306	-0.614507	99.9903	-0.0486476
0.0793333	22.006	12.6303	-0.615145	99.9881	-0.0486981
0.0876667	22.0494	12.6301	-0.615815	99.9868	-0.0487512
0.096	22.1012	12.63	-0.616555	99.9855	-0.0488098
0.104333	22.1478	12.6297	-0.617228	99.9838	-0.048863
0.112667	22.1965	12.6295	-0.617951	99.9821	-0.0489203
0.121	22.2489	12.6293	-0.61876	99.98	-0.0489843
0.129333	22.2981	12.629	-0.619542	99.978	-0.0490462
0.137667	22.3491	12.6288	-0.620341	99.976	-0.0491095
0.146	22.3912	12.6285	-0.621132	99.9743	-0.0491721
0.154333	22.4467	12.6284	-0.621939	99.9729	-0.049236
0.162667	22.4873	12.6282	-0.622769	99.9716	-0.0493018
0.171	22.5392	12.628	-0.623639	99.9697	-0.0493706
0.179333	22.5831	12.6277	-0.624507	99.9675	-0.0494393
0.187667	22.6326	12.6274	-0.625435	99.9656	-0.0495128
0.196	22.6798	12.6272	-0.626347	99.9636	-0.0495849
0.204333	22.7252	12.627	-0.627237	99.9618	-0.0496554
0.212667	22.7751	12.6267	-0.628173	99.9599	-0.0497295
0.221	22.8179	12.6265	-0.629114	99.958	-0.049804
0.229333	22.8608	12.6262	-0.630117	99.9561	-0.0498834
0.237667	22.9055	12.6259	-0.631111	99.9538	-0.0499621
0.246	22.9481	12.6256	-0.632108	99.9513	-0.0500411
0.254333	22.9955	12.6253	-0.633124	99.9489	-0.0501215
0.262667	23.0382	12.6251	-0.634109	99.947	-0.0501994
0.271	23.0846	12.6248	-0.635149	99.945	-0.0502818
0.279333	23.1344	12.6246	-0.636209	99.9428	-0.0503657
0.287667	23.1712	12.6243	-0.637241	99.9404	-0.0504474
0.296	23.2172	12.6239	-0.638289	99.9377	-0.0505304
0.304333	23.2627	12.6236	-0.63936	99.9352	-0.0506152
0.312667	23.3064	12.6233	-0.640446	99.9328	-0.0507011
0.321	23.3481	12.623	-0.641581	99.9307	-0.050791
0.329333	23.3939	12.6228	-0.642724	99.9285	-0.0508815
0.337667	23.4346	12.6225	-0.643859	99.9262	-0.0509713
0.346	23.4788	12.6221	-0.645002	99.9234	-0.0510618
0.354333	23.522	12.6218	-0.646143	99.9207	-0.0511521
0.362667	23.5676	12.6214	-0.647254	99.9177	-0.0512401
0.371	23.6029	12.621	-0.648388	99.9149	-0.0513299
0.379333	23.6419	12.6207	-0.649531	99.9124	-0.0514204
0.387667	23.6883	12.6204	-0.6507	99.9098	-0.0515129
0.396	23.7357	12.6201	-0.651836	99.9071	-0.0516028
0.404333	23.7747	12.6197	-0.652984	99.9043	-0.0516937
0.412667	23.8158	12.6193	-0.654163	99.9014	-0.051787
0.421	23.8527	12.619	-0.655369	99.8987	-0.0518825
0.429333	23.8948	12.6187	-0.656577	99.8962	-0.0519782
0.437667	23.9287	12.6183	-0.657783	99.8935	-0.0520736
0.446	23.9707	12.618	-0.659025	99.8911	-0.052172
0.454333	24.0145	12.6177	-0.660296	99.8885	-0.0522725
0.462667	24.0524	12.6173	-0.661561	99.8854	-0.0523727
0.471	24.0912	12.6169	-0.662798	99.8823	-0.0524706
0.479333	24.1337	12.6166	-0.663995	99.8794	-0.0525654
0.487667	24.1704	12.6161	-0.66523	99.8762	-0.0526631
0.496	24.2123	12.6158	-0.666444	99.8732	-0.0527593
0.504333	24.252	12.6154	-0.667682	99.87	-0.0528573
0.512667	24.2922	12.615	-0.668936	99.8668	-0.0529565
0.521	24.3331	12.6146	-0.670125	99.8638	-0.0530507
0.529333	24.3694	12.6142	-0.671346	99.8604	-0.0531473
0.537667	24.4146	12.6138	-0.672505	99.8574	-0.0532391
0.546	24.4487	12.6134	-0.673691	99.8547	-0.053333
0.554333	24.4908	12.6131	-0.674888	99.8519	-0.0534277
0.562667	24.532	12.6127	-0.676161	99.8489	-0.0535285
0.571	24.5661	12.6123	-0.677372	99.8457	-0.0536244
0.579333	24.6123	12.6119	-0.6786	99.8426	-0.0537216
0.587667	24.6499	12.6115	-0.679811	99.8395	-0.0538175
0.596	24.6888	12.6111	-0.681	99.8363	-0.0539116
0.604333	24.7269	12.6107	-0.682245	99.833	-0.0540102
0.612667	24.7665	12.6103	-0.683474	99.8299	-0.0541075
0.621	24.8089	12.6099	-0.684748	99.8265	-0.0542083
0.629333	24.849	12.6095	-0.686025	99.8231	-0.0543094
0.637667	24.8908	12.609	-0.68725	99.8197	-0.0544064
0.646	24.9265	12.6086	-0.688474	99.8161	-0.0545033
0.654333	24.9694	12.6082	-0.689726	99.8129	-0.0546024
0.662667	25.0097	12.6077	-0.690949	99.8095	-0.0546992
0.671	25.0495	12.6073	-0.692181	99.8062	-0.0547968
0.679333	25.0874	12.6069	-0.69345	99.803	-0.0548972
0.687667	25.1258	12.6065	-0.694698	99.7998	-0.054996
0.696	25.1663	12.6061	-0.695985	99.7965	-0.0550979
0.704333	25.2111	12.6056	-0.697284	99.793	-0.0552007
0.712667	25.2504	12.6052	-0.698568	99.7895	-0.0553024
0.721	25.2935	12.6048	-0.69989	99.786	-0.055407
0.729333	25.3359	12.6044	-0.701189	99.7828	-0.0555098
0.737667	25.3769	12.6039	-0.702458	99.7795	-0.0556104
0.746	25.4185	12.6035	-0.703785	99.7762	-0.0557154
0.754333	25.4611	12.6031	-0.705083	99.7727	-0.0558181
0.762667	25.5047	12.6026	-0.706415	99.769	-0.0559236
0.771	25.546	12.6022	-0.707772	99.7654	-0.056031
0.779333	25.5883	12.6017	-0.709069	99.7619	-0.0561337
0.787667	25.632	12.6013	-0.710372	99.7586	-0.0562368
0.796	25.6754	12.6009	-0.711658	99.7554	-0.0563387
0.804333	25.7177	12.6005	-0.712953	99.7521	-0.0564412
0.812667	25.763	12.6	-0.714261	99.7485	-0.0565447
0.821	25.8023	12.5996	-0.715611	99.7449	-0.0566516
0.829333	25.8441	12.5991	-0.716945	99.7414	-0.0567572
0.837667	25.8906	12.5987	-0.718299	99.738	-0.0568644
0.846	25.9383	12.5983	-0.719617	99.7348	-0.0569688
0.854333	25.9835	12.5978	-0.720907	99.7313	-0.0570709
0.862667	26.0256	12.5974	-0.722252	99.728	-0.0571773
0.871	26.0729	12.597	-0.723551	99.7245	-0.0572802
0.879333	26.1123	12.5966	-0.724894	99.7211	-0.0573865
0.887667	26.158	12.5961	-0.726288	99.7176	-0.0574968
0.896	26.2066	12.5957	-0.727708	99.7142	-0.0576093
0.904333	26.2527	12.5952	-0.729117	99.7106	-0.0577208
0.912667	26.297	12.5948	-0.730558	99.7072	-0.0578348
0.921	26.34	12.5943	-0.732001	99.7035	-0.0579491
0.929333	26.3913	12.5939	-0.733419	99.6999	-0.0580614
0.937667	26.4362	12.5934	-0.734877	99.6964	-0.0581768
0.946	26.4843	12.593	-0.736341	99.6928	-0.0582927
0.954333	26.5244	12.5925	-0.737853	99.6891	-0.0584123
0.962667	26.5789	12.5921	-0.739346	99.6855	-0.0585306
0.971	26.618	12.5916	-0.740794	99.6816	-0.0586452
0.979333	26.6709	12.5911	-0.742246	99.6778	-0.0587602
0.987667	26.7199	12.5906	-0.743699	99.6742	-0.0588752
0.996	26.769	12.5902	-0.74514	99.6705	-0.0589893
1.00433	26.819	12.5897	-0.746601	99.6666	-0.0591049
1.01267	26.8635	12.5892	-0.748101	99.6632	-0.0592237
1.021	26.9211	12.5888	-0.749614	99.6594	-0.0593435
1.02933	26.9627	12.5883	-0.75112	99.6556	-0.0594627
1.03767	27.0189	12.5878	-0.752587	99.6518	-0.0595788
1.046	27.0671	12.5873	-0.754071	99.648	-0.0596963
1.05433	27.119	12.5868	-0.755576	99.6442	-0.0598155
1.06267	27.1715	12.5864	-0.757083	99.6404	-0.0599348
1.071	27.2283	12.5859	-0.75856	99.6364	-0.0600516
1.07933	27.2801	12.5854	-0.760043	99.6324	-0.0601691
1.08767	27.3241	12.5849	-0.76154	99.6285	-0.0602876
1.096	27.3829	12.5844	-0.763059	99.6244	-0.0604079
1.10433	27.4328	12.5839	-0.764553	99.6206	-0.0605261
1.11267	27.4859	12.5834	-0.766062	99.6168	-0.0606456
1.121	27.5429	12.5829	-0.767642	99.613	-0.0607707
1.12933	27.5928	12.5824	-0.769203	99.609	-0.0608942
1.13767	27.6494	12.5819	-0.770738	99.605	-0.0610157
1.146	27.7098	12.5814	-0.772287	99.601	-0.0611383
1.15433	27.7649	12.5809	-0.773856	99.597	-0.0612626
1.16267	27.8205	12.5804	-0.775461	99.5929	-0.0613896
1.171	27.8739	12.5799	-0.77705	99.5889	-0.0615154
1.17933	27.9299	12.5794	-0.778616	99.5849	-0.0616394
1.18767	27.9898	12.5788	-0.780225	99.5806	-0.0617668
1.196	28.043	12.5783	-0.781805	99.5762	-0.0618919
1.20433	28.1013	12.5777	-0.783387	99.572	-0.0620171
1.21267	28.1567	12.5771	-0.784983	99.5674	-0.0621434
1.221	28.2187	12.5766	-0.786588	99.563	-0.0622705
1.22933	28.2741	12.5761	-0.788219	99.5589	-0.0623996
1.23767	28.3369	12.5755	-0.78984	99.5545	-0.062528
1.246	28.3936	12.575	-0.791426	99.5505	-0.0626535
1.25433	28.449	12.5745	-0.793054	99.5463	-0.0627824
1.26267	28.5144	12.5739	-0.794695	99.5418	-0.0629123
1.271	28.5729	12.5734	-0.796312	99.5375	-0.0630403
1.27933	28.6328	12.5728	-0.798001	99.5332	-0.063174
1.28767	28.6941	12.5723	-0.799612	99.529	-0.0633016
1.296	28.7544	12.5718	-0.801252	99.5248	-0.0634314
1.30433	28.8132	12.5712	-0.802935	99.5205	-0.0635646
1.31267	28.871	12.5707	-0.804582	99.5161	-0.063695
1.321	28.9345	12.5702	-0.806279	99.5121	-0.0638294
1.32933	28.9962	12.5696	-0.80796	99.5076	-0.0639624
1.33767	29.0634	12.569	-0.809645	99.5031	-0.0640958
1.346	29.1238	12.5685	-0.811342	99.4987	-0.0642302
1.35433	29.187	12.5679	-0.813062	99.4943	-0.0643663
1.36267	29.2514	12.5673	-0.814744	99.4898	-0.0644995
1.371	29.3168	12.5668	-0.816498	99.4851	-0.0646383
1.37933	29.3736	12.5661	-0.818249	99.4803	-0.0647769
1.38767	29.4373	12.5655	-0.820007	99.4755	-0.0649161
1.396	29.5068	12.5649	-0.821753	99.4706	-0.0650544
1.40433	29.575	12.5643	-0.82346	99.4658	-0.0651895
1.41267	29.6383	12.5638	-0.825235	99.4614	-0.06533
1.421	29.7096	12.5632	-0.826968	99.4571	-0.0654672
1.42933	29.7737	12.5627	-0.828761	99.4528	-0.0656092
1.43767	29.8381	12.5621	-0.830538	99.4485	-0.0657498
1.446	29.9077	12.5616	-0.832243	99.444	-0.0658848
1.45433	29.9739	12.561	-0.833967	99.4395	-0.0660213
1.46267	30.0397	12.5604	-0.8357	99.4352	-0.0661584
1.471	30.1089	12.5599	-0.837383	99.4306	-0.0662917
1.47933	30.1729	12.5593	-0.839091	99.4262	-0.066427
1.48767	30.2473	12.5587	-0.840922	99.4217	-0.0665719
1.496	30.3185	12.5581	-0.842729	99.417	-0.0667149
1.50433	30.3826	12.5575	-0.844506	99.412	-0.0668556
1.51267	30.4509	12.5569	-0.846209	99.4069	-0.0669904
1.521	30.5227	12.5562	-0.847955	99.4019	-0.0671287
1.52933	30.594	12.5556	-0.849768	99.3972	-0.0672722
1.53767	30.662	12.555	-0.851584	99.3925	-0.0674159
1.546	30.7293	12.5544	-0.853418	99.3875	-0.0675612
1.55433	30.808	12.5539	-0.855236	99.383	-0.067705
1.56267	30.8762	12.5533	-0.85709	99.3783	-0.0678519
1.571	30.9494	12.5527	-0.858912	99.3736	-0.067996
1.57933	31.0184	12.552	-0.860709	99.3686	-0.0681383
1.58767	31.0968	12.5514	-0.862557	99.3639	-0.0682846
1.596	31.1627	12.5508	-0.864438	99.3592	-0.0684335
1.60433	31.2393	12.5502	-0.866309	99.3542	-0.0685817
1.61267	31.311	12.5496	-0.868151	99.3492	-0.0687274
1.621	31.3882	12.549	-0.869986	99.3444	-0.0688727
1.62933	31.4583	12.5484	-0.871814	99.3397	-0.0690175
1.63767	31.5346	12.5477	-0.87371	99.3345	-0.0691676
1.646	31.6067	12.5471	-0.875598	99.3294	-0.069317
1.65433	31.6826	12.5464	-0.877437	99.3242	-0.0694626
1.66267	31.7549	12.5458	-0.879281	99.3191	-0.0696086
1.671	31.831	12.5451	-0.881119	99.314	-0.0697541
1.67933	31.9019	12.5445	-0.882976	99.3088	-0.0699011
1.68767	31.9829	12.5438	-0.884839	99.3037	-0.0700486
1.696	32.0573	12.5432	-0.886726	99.2986	-0.070198
1.70433	32.1354	12.5425	-0.888593	99.2932	-0.0703458
1.71267	32.2069	12.5418	-0.890463	99.2879	-0.0704938
1.721	32.2847	12.5412	-0.892304	99.2828	-0.0706396
1.72933	32.3608	12.5405	-0.894157	99.2776	-0.0707862
1.73767	32.4373	12.5399	-0.896053	99.2725	-0.0709364
1.746	32.5147	12.5392	-0.897943	99.2673	-0.071086
1.75433	32.5906	12.5386	-0.899849	99.2623	-0.0712368
1.76267	32.6668	12.5379	-0.901759	99.257	-0.071388
1.771	32.7482	12.5372	-0.903643	99.2515	-0.0715372
1.77933	32.822	12.5366	-0.905532	99.246	-0.0716868
1.78767	32.9034	12.5359	-0.907472	99.2409	-0.0718403
1.796	32.9821	12.5353	-0.909395	99.2358	-0.0719926
1.80433	33.065	12.5346	-0.911344	99.2308	-0.0721469
1.81267	33.1437	12.534	-0.913245	99.2256	-0.0722973
1.821	33.2272	12.5333	-0.915152	99.2203	-0.0724484
1.82933	33.3044	12.5326	-0.917084	99.215	-0.0726013
1.83767	33.381	12.5319	-0.918993	99.2095	-0.0727524
1.846	33.4577	12.5312	-0.920857	99.2038	-0.0728999
1.85433	33.5435	12.5305	-0.922747	99.1985	-0.0730496
1.86267	33.6245	12.5299	-0.924681	99.1931	-0.0732027
1.871	33.7053	12.5292	-0.926619	99.1877	-0.0733561
1.87933	33.7785	12.5285	-0.92854	99.1822	-0.0735082
1.88767	33.8631	12.5278	-0.930442	99.1765	-0.0736587
1.896	33.9477	12.527	-0.932368	99.1708	-0.0738112
1.90433	34.0264	12.5263	-0.934274	99.1651	-0.0739621
1.91267	34.1051	12.5256	-0.9362	99.1593	-0.0741146
1.921	34.1908	12.5249	-0.938128	99.1536	-0.0742672
1.92933	34.2686	12.5242	-0.940065	99.1481	-0.0744206
1.93767	34.3512	12.5235	-0.942026	99.1426	-0.0745758
1.946	34.4331	12.5228	-0.94397	99.1369	-0.0747297
1.95433	34.5146	12.522	-0.945875	99.1311	-0.0748805
1.96267	34.5986	12.5213	-0.947807	99.1252	-0.0750335
1.971	34.6839	12.5205	-0.949771	99.1192	-0.075189
1.97933	34.7622	12.5198	-0.951754	99.1133	-0.0753459
1.98767	34.8447	12.519	-0.953715	99.1073	-0.0755012
1.996	34.9194	12.5183	-0.955653	99.1016	-0.0756546
2.00433	35.0152	12.5175	-0.957627	99.0956	-0.0758109
2.01267	35.0943	12.5168	-0.959602	99.0896	-0.0759672
2.021	35.1773	12.516	-0.961611	99.0833	-0.0761263
2.02933	35.2589	12.5152	-0.963592	99.0773	-0.0762831
2.03767	35.3462	12.5145	-0.965553	99.0715	-0.0764383
2.046	35.4268	12.5138	-0.96752	99.0656	-0.0765941
2.05433	35.5119	12.513	-0.969506	99.0599	-0.0767513
2.06267	35.5949	12.5123	-0.971458	99.0543	-0.0769058
2.071	35.6835	12.5116	-0.9734	99.0487	-0.0770595
2.07933	35.7669	12.5109	-0.975383	99.0427	-0.0772165
2.08767	35.8512	12.5101	-0.977346	99.037	-0.0773719
2.096	35.9321	12.5094	-0.979336	99.0312	-0.0775295
2.10433	36.0174	12.5087	-0.981258	99.0253	-0.0776816
2.11267	36.1005	12.5079	-0.983154	99.0191	-0.0778317
2.121	36.1903	12.5071	-0.985076	99.0126	-0.0779839
2.12933	36.2726	12.5063	-0.98703	99.0064	-0.0781386
2.13767	36.3582	12.5055	-0.988968	99.0002	-0.078292
2.146	36.4433	12.5047	-0.990917	98.9939	-0.0784463
2.15433	36.5302	12.5039	-0.992846	98.9876	-0.078599
2.16267	36.6162	12.5031	-0.994779	98.9814	-0.078752
2.171	36.6995	12.5024	-0.996675	98.9754	-0.0789021
2.17933	36.7826	12.5016	-0.998606	98.9693	-0.0790549
2.18767	36.8724	12.5008	-1.00052	98.9634	-0.0792062
2.196	36.9591	12.5002	-1.00249	98.9579	-0.0793622
2.20433	37.0452	12.4994	-1.00444	98.9522	-0.079517
2.21267	37.1323	12.4987	-1.00637	98.9464	-0.0796693
2.221	37.219	12.4979	-1.00828	98.9404	-0.0798211
2.22933	37.3005	12.4972	-1.0102	98.9344	-0.0799725
2.23767	37.389	12.4964	-1.01216	98.9286	-0.0801284
2.246	37.4768	12.4957	-1.01407	98.9225	-0.0802794
2.25433	37.5663	12.4949	-1.016	98.916	-0.0804319
2.26267	37.6492	12.494	-1.0179	98.9095	-0.0805827
2.271	37.7342	12.4932	-1.01984	98.9032	-0.0807358
2.27933	37.818	12.4924	-1.02174	98.8966	-0.0808866
2.28767	37.9057	12.4916	-1.02366	98.8899	-0.0810383
2.296	37.9884	12.4907	-1.02556	98.8832	-0.0811886
2.30433	38.0765	12.4899	-1.02742	98.8766	-0.081336
2.31267	38.1645	12.4891	-1.02933	98.8703	-0.0814871
2.321	38.2558	12.4883	-1.03124	98.8637	-0.0816382
2.32933	38.3415	12.4875	-1.03316	98.8576	-0.0817904
2.33767	38.4292	12.4867	-1.03508	98.8516	-0.0819425
2.346	38.5132	12.4859	-1.03695	98.8454	-0.0820906
2.35433	38.6017	12.4851	-1.03879	98.839	-0.0822362
2.36267	38.6899	12.4843	-1.04067	98.8328	-0.0823851
2.371	38.7783	12.4836	-1.04252	98.8266	-0.0825319
2.37933	38.8619	12.4828	-1.04439	98.8204	-0.0826796
2.38767	38.9463	12.482	-1.04631	98.8143	-0.0828316
2.396	39.038	12.4812	-1.04815	98.808	-0.0829776
2.40433	39.1246	12.4804	-1.04996	98.8017	-0.0831205
2.41267	39.209	12.4796	-1.0518	98.7949	-0.0832663
2.421	39.2961	12.4787	-1.05365	98.7881	-0.0834125
2.42933	39.385	12.4778	-1.05552	98.7812	-0.0835604
2.43767	39.4756	12.477	-1.05739	98.7746	-0.0837088
2.446	39.5593	12.4761	-1.05924	98.7677	-0.0838555
2.45433	39.6514	12.4753	-1.06111	98.7612	-0.0840028
2.46267	39.7345	12.4745	-1.06298	98.7545	-0.0841508
2.471	39.8211	12.4736	-1.06478	98.7477	-0.084294
2.47933	39.9067	12.4727	-1.06662	98.7408	-0.0844392
2.48767	39.9985	12.4718	-1.06848	98.7338	-0.0845869
2.496	40.0821	12.471	-1.07032	98.7273	-0.0847319
2.50433	40.1725	12.4702	-1.07216	98.7209	-0.0848778
2.51267	40.2608	12.4694	-1.07399	98.7146	-0.0850226
2.521	40.3447	12.4686	-1.07585	98.7081	-0.0851701
2.52933	40.4332	12.4678	-1.07764	98.7017	-0.0853117
2.53767	40.5193	12.467	-1.07943	98.695	-0.0854536
2.546	40.6056	12.4661	-1.08123	98.6885	-0.0855959
2.55433	40.6966	12.4653	-1.08304	98.6817	-0.0857392
2.56267	40.7788	12.4645	-1.08486	98.6753	-0.0858832
2.571	40.8699	12.4637	-1.08664	98.669	-0.0860243
2.57933	40.9523	12.4628	-1.08842	98.6624	-0.0861655
2.58767	41.0426	12.462	-1.0902	98.6556	-0.0863058
2.596	41.1278	12.4611	-1.09201	98.6488	-0.0864493
2.60433	41.2185	12.4602	-1.0938	98.6419	-0.0865914
2.61267	41.3081	12.4594	-1.0956	98.635	-0.0867332
2.621	41.3937	12.4585	-1.09738	98.628	-0.0868742
2.62933	41.4773	12.4576	-1.09915	98.6212	-0.0870143
2.63767	41.5719	12.4568	-1.10091	98.6145	-0.0871542
2.646	41.6535	12.4559	-1.10269	98.6072	-0.087295
2.65433	41.7456	12.455	-1.10447	98.6002	-0.0874361
2.66267	41.8263	12.4541	-1.10623	98.5933	-0.0875754
2.671	41.9165	12.4532	-1.10798	98.5865	-0.0877134
2.67933	41.9992	12.4524	-1.10968	98.5797	-0.0878484
2.68767	42.0871	12.4515	-1.11134	98.5728	-0.0879798
2.696	42.1743	12.4506	-1.11307	98.566	-0.0881165
2.70433	42.2627	12.4498	-1.11482	98.5593	-0.0882552
2.71267	42.3485	12.449	-1.11653	98.5526	-0.0883903
2.721	42.4328	12.4481	-1.11824	98.5457	-0.0885262
2.72933	42.525	12.4473	-1.11992	98.5392	-0.0886588
2.73767	42.61	12.4464	-1.12161	98.5324	-0.088793
2.746	42.697	12.4455	-1.12327	98.5253	-0.0889241
2.75433	42.7833	12.4446	-1.12494	98.5185	-0.0890562
2.76267	42.8691	12.4438	-1.12657	98.5117	-0.0891854
2.771	42.957	12.4429	-1.12824	98.5046	-0.0893171
2.77933	43.042	12.4421	-1.12987	98.4979	-0.0894469
2.78767	43.1324	12.4412	-1.13148	98.4909	-0.0895737
2.796	43.2188	12.4403	-1.13309	98.4837	-0.0897015
2.80433	43.3026	12.4393	-1.13469	98.4765	-0.0898283
2.81267	43.3852	12.4384	-1.13631	98.4689	-0.0899562
2.821	43.4801	12.4375	-1.13787	98.4617	-0.0900799
2.82933	43.5615	12.4366	-1.13947	98.4547	-0.0902068
2.83767	43.6498	12.4357	-1.14106	98.4475	-0.0903323
2.846	43.7364	12.4348	-1.14266	98.4403	-0.090459
2.85433	43.8235	12.4339	-1.14426	98.4334	-0.0905857
2.86267	43.906	12.433	-1.14586	98.4263	-0.0907123
2.871	43.9928	12.4321	-1.14745	98.4193	-0.0908386
2.87933	44.0821	12.4313	-1.14902	98.4127	-0.0909625
2.88767	44.1656	12.4304	-1.15056	98.406	-0.0910843
2.896	44.2493	12.4296	-1.1521	98.3996	-0.0912061
2.90433	44.3349	12.4288	-1.15363	98.3928	-0.0913278
2.91267	44.4233	12.4279	-1.15518	98.3857	-0.0914503
2.921	44.5083	12.427	-1.15673	98.3786	-0.0915728
2.92933	44.5949	12.4261	-1.15829	98.3715	-0.0916964
2.93767	44.678	12.4252	-1.15979	98.3644	-0.0918153
2.946	44.7642	12.4243	-1.16127	98.3574	-0.0919321
2.95433	44.8527	12.4234	-1.16276	98.3504	-0.09205
2.96267	44.9343	12.4225	-1.16427	98.343	-0.0921696
2.971	45.0171	12.4215	-1.16578	98.3356	-0.0922892
2.97933	45.1062	12.4206	-1.16725	98.3283	-0.0924061
2.98767	45.1904	12.4197	-1.16877	98.321	-0.092526
2.996	45.2741	12.4188	-1.17023	98.314	-0.092642
3.00433	45.3634	12.4179	-1.17168	98.3069	-0.0927568
3.01267	45.4493	12.417	-1.1731	98.2999	-0.0928688
3.021	45.5302	12.4162	-1.17455	98.2929	-0.0929835
3.02933	45.6155	12.4152	-1.17601	98.2857	-0.0930992
3.03767	45.7019	12.4143	-1.17746	98.2783	-0.0932143
3.046	45.7858	12.4134	-1.17887	98.2711	-0.093326
3.05433	45.8646	12.4125	-1.18027	98.2638	-0.0934368
3.06267	45.9488	12.4116	-1.18167	98.2568	-0.0935472
3.071	46.0393	12.4107	-1.18304	98.2497	-0.0936555
3.07933	46.1217	12.4098	-1.18439	98.2422	-0.0937623
3.08767	46.2087	12.4088	-1.18572	98.2349	-0.0938679
3.096	46.2894	12.4079	-1.18711	98.2276	-0.0939779
3.10433	46.3759	12.407	-1.18846	98.2203	-0.0940848
3.11267	46.4568	12.4061	-1.18978	98.2132	-0.094189
3.121	46.5461	12.4052	-1.19107	98.2061	-0.0942914
3.12933	46.6296	12.4043	-1.19233	98.199	-0.0943916
3.13767	46.7142	12.4034	-1.19363	98.1917	-0.094494
3.146	46.8026	12.4024	-1.19494	98.1844	-0.0945982
3.15433	46.8853	12.4015	-1.19626	98.1771	-0.0947025
3.16267	46.9671	12.4006	-1.19758	98.1698	-0.0948066
3.171	47.0533	12.3997	-1.19889	98.1627	-0.0949105
3.17933	47.1361	12.3988	-1.20012	98.1554	-0.0950082
3.18767	47.2182	12.3979	-1.20138	98.1482	-0.0951075
3.196	47.298	12.397	-1.20265	98.1409	-0.0952084
3.20433	47.3821	12.396	-1.20387	98.1336	-0.0953051
3.21267	47.4649	12.3951	-1.20515	98.1264	-0.0954064
3.221	47.5506	12.3942	-1.20641	98.1194	-0.0955058
3.22933	47.6331	12.3933	-1.20764	98.1121	-0.0956035
3.23767	47.7157	12.3924	-1.20881	98.1049	-0.0956955
3.246	47.7981	12.3915	-1.20999	98.0977	-0.0957895
3.25433	47.8798	12.3906	-1.21116	98.0905	-0.0958822
3.26267	47.9645	12.3897	-1.21236	98.0832	-0.0959767
3.271	48.0494	12.3887	-1.21356	98.076	-0.0960722
3.27933	48.1294	12.3878	-1.21473	98.0688	-0.0961645
3.28767	48.2147	12.3869	-1.21592	98.0615	-0.0962589
3.296	48.2972	12.386	-1.21709	98.0543	-0.0963513
3.30433	48.3846	12.3851	-1.21824	98.047	-0.0964422
3.31267	48.4626	12.3842	-1.21937	98.0398	-0.0965314
3.321	48.5421	12.3833	-1.22054	98.0325	-0.0966247
3.32933	48.6275	12.3823	-1.2217	98.0251	-0.0967165
3.33767	48.7093	12.3814	-1.22283	98.018	-0.0968058
3.346	48.7913	12.3805	-1.22396	98.011	-0.096895
3.35433	48.8739	12.3796	-1.22505	98.0036	-0.0969818
3.36267	48.9563	12.3787	-1.22614	97.9964	-0.0970676
3.371	49.0411	12.3778	-1.22724	97.9891	-0.097155
3.37933	49.1208	12.3768	-1.22833	97.9817	-0.0972411
3.38767	49.2028	12.3759	-1.22944	97.9744	-0.097329
3.396	49.2845	12.375	-1.23051	97.9671	-0.0974141
3.40433	49.3678	12.3741	-1.23157	97.9601	-0.0974977
3.41267	49.4527	12.3732	-1.23262	97.9529	-0.097581
3.421	49.5362	12.3723	-1.23367	97.9454	-0.0976638
3.42933	49.6173	12.3713	-1.23467	97.9377	-0.0977434
3.43767	49.6991	12.3704	-1.2357	97.9305	-0.0978243
3.446	49.7745	12.3695	-1.23673	97.9233	-0.0979062
3.45433	49.8554	12.3685	-1.23773	97.916	-0.0979852
3.46267	49.9383	12.3676	-1.23871	97.9088	-0.0980627
3.471	50.0165	12.3667	-1.23965	97.9014	-0.098137
3.47933	50.0975	12.3658	-1.24063	97.8939	-0.098215
3.48767	50.1803	12.3648	-1.24162	97.8865	-0.0982934
3.496	50.2666	12.3639	-1.24258	97.8793	-0.0983694
3.50433	50.3462	12.363	-1.24354	97.8721	-0.0984453
3.51267	50.4265	12.3621	-1.24451	97.8653	-0.0985221
3.521	50.5085	12.3612	-1.24547	97.8582	-0.0985977
3.52933	50.5852	12.3603	-1.24639	97.8509	-0.0986711
3.53767	50.6627	12.3594	-1.24732	97.8439	-0.0987447
3.546	50.748	12.3585	-1.24829	97.8366	-0.0988215
3.55433	50.8316	12.3576	-1.24926	97.8293	-0.0988983
3.56267	50.9126	12.3567	-1.25015	97.8222	-0.098969
3.571	50.993	12.3558	-1.25103	97.815	-0.0990386
3.57933	51.074	12.3548	-1.25196	97.8074	-0.0991117
3.58767	51.1537	12.3539	-1.25287	97.8001	-0.0991836
3.596	51.233	12.3529	-1.25376	97.7925	-0.0992545
3.60433	51.3134	12.352	-1.25461	97.7849	-0.0993219
3.61267	51.3953	12.3511	-1.25552	97.7776	-0.0993937
3.621	51.4754	12.3501	-1.2564	97.7703	-0.0994637
3.62933	51.5527	12.3492	-1.25724	97.7629	-0.0995295
3.63767	51.6295	12.3483	-1.25806	97.7558	-0.0995948
3.646	51.7108	12.3474	-1.2589	97.7484	-0.0996611
3.65433	51.797	12.3465	-1.25975	97.7413	-0.0997285
3.66267	51.8791	12.3456	-1.26056	97.7341	-0.0997924
3.671	51.9587	12.3447	-1.26139	97.7271	-0.0998586
3.67933	52.0391	12.3438	-1.26222	97.72	-0.0999242
3.68767	52.1181	12.3429	-1.26307	97.7129	-0.0999911
3.696	52.1936	12.342	-1.26384	97.7055	-0.100052
3.70433	52.2763	12.341	-1.26461	97.6982	-0.100114
3.71267	52.3536	12.3401	-1.26543	97.6911	-0.100178
3.721	52.438	12.3392	-1.26624	97.6837	-0.100243
3.72933	52.5147	12.3383	-1.26708	97.6766	-0.100309
3.73767	52.5952	12.3374	-1.26788	97.6693	-0.100372
3.746	52.6808	12.3365	-1.26865	97.6622	-0.100433
3.75433	52.7578	12.3356	-1.2694	97.655	-0.100493
3.76267	52.8364	12.3347	-1.27017	97.6479	-0.100554
3.771	52.9222	12.3338	-1.27089	97.6406	-0.100611
3.77933	52.9945	12.3329	-1.27166	97.6336	-0.100672
3.78767	53.0742	12.3319	-1.27242	97.6262	-0.100731
3.796	53.1534	12.331	-1.2731	97.6187	-0.100785
3.80433	53.2378	12.3301	-1.27377	97.6113	-0.100839
3.81267	53.3175	12.3291	-1.27441	97.604	-0.100889
3.821	53.3989	12.3282	-1.27506	97.5968	-0.100941
3.82933	53.4754	12.3273	-1.27573	97.5896	-0.100994
3.83767	53.5545	12.3264	-1.2764	97.5823	-0.101047
3.846	53.6361	12.3255	-1.27704	97.5752	-0.101097
3.85433	53.7189	12.3246	-1.27772	97.5679	-0.101151
3.86267	53.7966	12.3236	-1.27837	97.5604	-0.101202
3.871	53.8747	12.3227	-1.27903	97.5531	-0.101255
3.87933	53.9562	12.3218	-1.27973	97.546	-0.10131
3.88767	54.0361	12.3209	-1.28044	97.539	-0.101366
3.896	54.1163	12.32	-1.28115	97.5318	-0.101423
3.90433	54.1958	12.3191	-1.28186	97.5246	-0.101479
3.91267	54.2722	12.3182	-1.28253	97.5173	-0.101532
3.921	54.3557	12.3172	-1.2832	97.5099	-0.101585
3.92933	54.4329	12.3163	-1.28386	97.5024	-0.101637
3.93767	54.5151	12.3154	-1.28451	97.4955	-0.101688
3.946	54.589	12.3146	-1.28512	97.4886	-0.101737
3.95433	54.6733	12.3137	-1.28575	97.4818	-0.101787
3.96267	54.7482	12.3128	-1.28636	97.4747	-0.101835
3.971	54.8267	12.3119	-1.28697	97.4674	-0.101883
3.97933	54.9048	12.3109	-1.28753	97.46	-0.101928
3.98767	54.9879	12.31	-1.28811	97.4525	-0.101973
3.996	55.0659	12.3091	-1.28871	97.4451	-0.102021
4.00433	55.1456	12.3082	-1.28931	97.4381	-0.102069
4.01267	55.226	12.3073	-1.28989	97.4308	-0.102114
4.021	55.3048	12.3063	-1.29048	97.4233	-0.102161
4.02933	55.3809	12.3054	-1.2911	97.416	-0.10221
4.03767	55.4659	12.3045	-1.29166	97.4087	-0.102255
4.046	55.5445	12.3035	-1.29222	97.4012	-0.102299
4.05433	55.6264	12.3026	-1.29276	97.3937	-0.102342
4.06267	55.7054	12.3017	-1.29334	97.3866	-0.102388
4.071	55.7813	12.3008	-1.29387	97.3797	-0.102429
4.07933	55.8622	12.2999	-1.29441	97.3724	-0.102473
4.08767	55.9426	12.299	-1.29494	97.3652	-0.102514
4.096	56.0233	12.2981	-1.29548	97.3583	-0.102557
4.10433	56.103	12.2971	-1.296	97.3507	-0.102598
4.11267	56.1793	12.2962	-1.29653	97.3435	-0.10264
4.121	56.2629	12.2953	-1.29705	97.3361	-0.102681
4.12933	56.3389	12.2944	-1.29756	97.3291	-0.102722
4.13767	56.4223	12.2935	-1.29808	97.3222	-0.102763
4.146	56.5012	12.2927	-1.29857	97.3152	-0.102802
4.15433	56.5789	12.2917	-1.29908	97.3077	-0.102842
4.16267	56.6582	12.2908	-1.29955	97.3006	-0.102879
4.171	56.7383	12.2899	-1.30003	97.2934	-0.102917
4.17933	56.8184	12.289	-1.30053	97.286	-0.102957
4.18767	56.895	12.2881	-1.30101	97.2788	-0.102995
4.196	56.9723	12.2872	-1.30146	97.2717	-0.10303
4.20433	57.0529	12.2863	-1.30192	97.2648	-0.103067
4.21267	57.1331	12.2854	-1.30239	97.2576	-0.103104
4.221	57.2115	12.2845	-1.30287	97.2504	-0.103142
4.22933	57.2876	12.2836	-1.30337	97.2432	-0.103181
4.23767	57.3697	12.2827	-1.30384	97.2363	-0.103219
4.246	57.4422	12.2818	-1.30432	97.2291	-0.103257
4.25433	57.5248	12.2809	-1.30479	97.2219	-0.103294
4.26267	57.603	12.28	-1.30523	97.2148	-0.103329
4.271	57.6819	12.2791	-1.30567	97.2077	-0.103364
4.27933	57.7589	12.2782	-1.30611	97.2005	-0.103399
4.28767	57.8435	12.2772	-1.30658	97.1931	-0.103435
4.296	57.9211	12.2763	-1.30703	97.1858	-0.103471
4.30433	57.9975	12.2754	-1.30744	97.1789	-0.103504
4.31267	58.0766	12.2745	-1.30787	97.1718	-0.103538
4.321	58.1503	12.2736	-1.30831	97.1645	-0.103573
4.32933	58.2337	12.2727	-1.30871	97.1571	-0.103604
4.33767	58.3172	12.2718	-1.30913	97.15	-0.103638
4.346	58.3947	12.2709	-1.30953	97.1428	-0.103669
4.35433	58.467	12.27	-1.30998	97.1357	-0.103705
4.36267	58.5489	12.2691	-1.31043	97.1285	-0.103741
4.371	58.6269	12.2682	-1.31085	97.1215	-0.103773
4.37933	58.7045	12.2673	-1.31124	97.1144	-0.103805
4.38767	58.7914	12.2664	-1.31166	97.1072	-0.103838
4.396	58.8665	12.2655	-1.31207	97.1001	-0.10387
4.40433	58.9479	12.2646	-1.31245	97.0932	-0.103901
4.41267	59.0242	12.2637	-1.31286	97.0863	-0.103933
4.421	59.1037	12.2628	-1.31326	97.0792	-0.103965
4.42933	59.1822	12.2619	-1.31369	97.0721	-0.103999
4.43767	59.2643	12.261	-1.31408	97.0649	-0.10403
4.446	59.3423	12.2601	-1.31448	97.0578	-0.104061
4.45433	59.4213	12.2592	-1.31488	97.0507	-0.104093
4.46267	59.5058	12.2583	-1.3153	97.0434	-0.104126
4.471	59.5793	12.2574	-1.3157	97.0364	-0.104158
4.47933	59.6603	12.2565	-1.31606	97.0292	-0.104187
4.48767	59.7371	12.2556	-1.31647	97.0221	-0.104219
4.496	59.8149	12.2547	-1.3169	97.0151	-0.104253
4.50433	59.8951	12.2538	-1.31732	97.0079	-0.104286
4.51267	59.9764	12.2529	-1.3177	97.0008	-0.104317
4.521	60.0566	12.252	-1.31808	96.9936	-0.104346
4.52933	60.1373	12.2511	-1.31844	96.9864	-0.104375
4.53767	60.2137	12.2502	-1.31883	96.9794	-0.104406
4.546	60.2938	12.2493	-1.31921	96.9723	-0.104435
4.55433	60.3725	12.2484	-1.31961	96.965	-0.104468
4.56267	60.4532	12.2475	-1.32002	96.9578	-0.1045
4.571	60.5295	12.2466	-1.32041	96.9506	-0.104531
4.57933	60.6097	12.2457	-1.3208	96.9434	-0.104562
4.58767	60.6867	12.2448	-1.32116	96.9362	-0.10459
4.596	60.7618	12.2439	-1.32155	96.9292	-0.104621
4.60433	60.8413	12.243	-1.32194	96.9222	-0.104652
4.61267	60.9197	12.2421	-1.32231	96.9151	-0.104681
4.621	61.0054	12.2412	-1.3227	96.908	-0.104712
4.62933	61.0882	12.2403	-1.32308	96.9008	-0.104742
4.63767	61.1597	12.2394	-1.32344	96.8938	-0.10477
4.646	61.2384	12.2385	-1.32382	96.8867	-0.1048
4.65433	61.3209	12.2376	-1.3242	96.8795	-0.104831
4.66267	61.4009	12.2367	-1.32454	96.8723	-0.104858
4.671	61.4752	12.2358	-1.32492	96.8651	-0.104888
4.67933	61.555	12.2349	-1.32527	96.8578	-0.104916
4.68767	61.6316	12.2339	-1.32567	96.8503	-0.104947
4.696	61.7134	12.233	-1.3261	96.8429	-0.104981
4.70433	61.7925	12.2321	-1.32644	96.8358	-0.105008
4.71267	61.8717	12.2312	-1.32681	96.829	-0.105037
4.721	61.9525	12.2303	-1.32718	96.8217	-0.105067
4.72933	62.0357	12.2294	-1.32754	96.8145	-0.105095
4.73767	62.1123	12.2285	-1.32788	96.8073	-0.105122
4.746	62.1955	12.2276	-1.32825	96.8002	-0.105152
4.75433	62.2719	12.2267	-1.32862	96.7932	-0.105181
4.76267	62.3526	12.2258	-1.32898	96.7862	-0.105209
4.771	62.4305	12.2249	-1.32929	96.7791	-0.105234
4.77933	62.5097	12.2241	-1.3296	96.7722	-0.105258
4.78767	62.5857	12.2231	-1.32993	96.7647	-0.105284
4.796	62.6647	12.2222	-1.33027	96.7572	-0.105311
4.80433	62.7505	12.2212	-1.3306	96.7499	-0.105337
4.81267	62.8275	12.2203	-1.33095	96.7426	-0.105365
4.821	62.9043	12.2194	-1.33132	96.7355	-0.105394
4.82933	62.9795	12.2185	-1.33169	96.7283	-0.105423
4.83767	63.0643	12.2176	-1.332	96.721	-0.105448
4.846	63.1399	12.2167	-1.33239	96.7136	-0.105479
4.85433	63.2171	12.2158	-1.33278	96.7066	-0.10551
4.86267	63.2999	12.2148	-1.33323	96.6992	-0.105546
4.871	63.3815	12.2139	-1.33368	96.6919	-0.105581
4.87933	63.4584	12.213	-1.33406	96.6846	-0.105611
4.88767	63.5405	12.2121	-1.33448	96.6774	-0.105644
4.896	63.617	12.2112	-1.3349	96.6703	-0.105678
4.90433	63.6969	12.2103	-1.33529	96.6632	-0.105708
4.91267	63.7798	12.2094	-1.33569	96.656	-0.105741
4.921	63.8609	12.2084	-1.33613	96.6485	-0.105775
4.92933	63.9357	12.2075	-1.33654	96.6413	-0.105807
4.93767	64.02	12.2066	-1.33695	96.6341	-0.10584
4.946	64.0989	12.2057	-1.33726	96.6269	-0.105865
4.95433	64.1787	12.2048	-1.33762	96.6197	-0.105893
4.96267	64.2589	12.2039	-1.33803	96.6126	-0.105925
4.971	64.3415	12.203	-1.33839	96.6052	-0.105954
4.97933	64.4203	12.202	-1.33872	96.5979	-0.10598
4.98767	64.5004	12.2011	-1.33909	96.5907	-0.106009
4.996	64.5805	12.2002	-1.3395	96.5835	-0.106042
5.00433	64.6622	12.1993	-1.33992	96.5762	-0.106075
5.01267	64.7406	12.1984	-1.34033	96.5689	-0.106108
5.021	64.8234	12.1974	-1.34074	96.5611	-0.10614
5.02933	64.9015	12.1964	-1.3412	96.5535	-0.106176
5.03767	64.9775	12.1955	-1.34166	96.5462	-0.106213
5.046	65.0556	12.1946	-1.34216	96.5389	-0.106252
5.05433	65.1396	12.1937	-1.34266	96.5315	-0.106292
5.06267	65.2158	12.1927	-1.34318	96.5238	-0.106333
5.071	65.2979	12.1917	-1.34369	96.516	-0.106374
5.07933	65.385	12.1907	-1.34416	96.5085	-0.106411
5.08767	65.4604	12.1898	-1.34465	96.5009	-0.106449
5.096	65.5403	12.1888	-1.34509	96.4934	-0.106485
5.10433	65.6231	12.1879	-1.34559	96.4861	-0.106524
5.11267	65.7003	12.187	-1.34613	96.4786	-0.106567
5.121	65.7808	12.186	-1.34662	96.4709	-0.106606
5.12933	65.8616	12.185	-1.34712	96.4631	-0.106645
5.13767	65.941	12.184	-1.34769	96.4554	-0.10669
5.146	66.0209	12.1831	-1.34824	96.448	-0.106734
5.15433	66.1039	12.1822	-1.34883	96.4406	-0.106781
5.16267	66.1822	12.1812	-1.34941	96.4329	-0.106827
5.171	66.2621	12.1802	-1.35004	96.4252	-0.106876
5.17933	66.3399	12.1792	-1.35069	96.4175	-0.106928
5.18767	66.42	12.1783	-1.35133	96.4098	-0.106979
5.196	66.5023	12.1773	-1.35197	96.402	-0.107029
5.20433	66.5791	12.1764	-1.35265	96.3946	-0.107083
5.21267	66.6587	12.1754	-1.35331	96.3871	-0.107135
5.221	66.7446	12.1745	-1.35396	96.3795	-0.107187
5.22933	66.8232	12.1735	-1.35462	96.3718	-0.107239
5.23767	66.906	12.1725	-1.3553	96.3639	-0.107293
5.246	66.9828	12.1715	-1.35601	96.3558	-0.107349
5.25433	67.0577	12.1704	-1.35674	96.3477	-0.107407
5.26267	67.1405	12.1695	-1.3575	96.3399	-0.107467
5.271	67.2224	12.1685	-1.35822	96.3321	-0.107524
5.27933	67.3012	12.1675	-1.35896	96.3241	-0.107582
5.28767	67.3798	12.1664	-1.35973	96.316	-0.107644
5.296	67.4591	12.1654	-1.36051	96.3078	-0.107706
5.30433	67.544	12.1644	-1.36131	96.2996	-0.107769
5.31267	67.6207	12.1634	-1.36216	96.2917	-0.107836
5.321	67.7013	12.1623	-1.36295	96.2835	-0.107898
5.32933	67.7829	12.1613	-1.36379	96.2755	-0.107965
5.33767	67.8639	12.1603	-1.3646	96.2674	-0.108029
5.346	67.9394	12.1593	-1.36541	96.2594	-0.108093
5.35433	68.0222	12.1582	-1.36627	96.251	-0.108161
5.36267	68.1063	12.1572	-1.36715	96.243	-0.108231
5.371	68.1839	12.1562	-1.36802	96.2349	-0.1083
5.37933	68.2637	12.1552	-1.36889	96.2267	-0.108369
5.38767	68.343	12.1541	-1.36977	96.2184	-0.108438
5.396	68.4282	12.153	-1.37064	96.21	-0.108508
5.40433	68.5086	12.152	-1.37155	96.2019	-0.108579
5.41267	68.5875	12.151	-1.37242	96.1937	-0.108648
5.421	68.6652	12.1499	-1.37332	96.1854	-0.108719
5.42933	68.7469	12.1489	-1.37427	96.1769	-0.108794
5.43767	68.8289	12.1478	-1.37518	96.1685	-0.108867
5.446	68.908	12.1468	-1.37613	96.1602	-0.108942
5.45433	68.99	12.1457	-1.3771	96.1519	-0.109018
5.46267	69.0731	12.1447	-1.3781	96.1435	-0.109098
5.471	69.1528	12.1436	-1.3791	96.1353	-0.109177
5.47933	69.2292	12.1426	-1.38014	96.127	-0.109259
5.48767	69.3107	12.1415	-1.38119	96.1184	-0.109343
5.496	69.3936	12.1404	-1.38224	96.1103	-0.109426
5.50433	69.4698	12.1394	-1.38328	96.1019	-0.109508
5.51267	69.5557	12.1383	-1.3843	96.0934	-0.109588
5.521	69.6365	12.1372	-1.38537	96.085	-0.109673
5.52933	69.7142	12.1362	-1.38644	96.0763	-0.109758
5.53767	69.7956	12.1351	-1.3875	96.0677	-0.109842
5.546	69.8785	12.134	-1.38856	96.0591	-0.109926
5.55433	69.9613	12.1329	-1.38963	96.0508	-0.11001
5.56267	70.0394	12.1319	-1.39066	96.0424	-0.110092
5.571	70.1184	12.1308	-1.39175	96.0339	-0.110178
5.57933	70.1973	12.1297	-1.39285	96.0253	-0.110265
5.58767	70.277	12.1287	-1.39394	96.0169	-0.110352
5.596	70.3596	12.1275	-1.39505	96.0082	-0.11044
5.60433	70.4391	12.1265	-1.39616	95.9995	-0.110528
5.61267	70.5207	12.1254	-1.39728	95.9909	-0.110616
5.621	70.6013	12.1243	-1.39841	95.9822	-0.110705
5.62933	70.6877	12.1231	-1.39956	95.9733	-0.110796
5.63767	70.7644	12.122	-1.4007	95.9642	-0.110887
5.646	70.8448	12.1208	-1.40187	95.9549	-0.11098
5.65433	70.9297	12.1197	-1.40301	95.9456	-0.111069
5.66267	71.0125	12.1185	-1.40417	95.9362	-0.111161
5.671	71.0916	12.1173	-1.40532	95.9269	-0.111253
5.67933	71.1726	12.1162	-1.40652	95.918	-0.111347
5.68767	71.2553	12.115	-1.40766	95.909	-0.111437
5.696	71.3311	12.1139	-1.4088	95.9003	-0.111528
5.70433	71.4172	12.1128	-1.40995	95.8915	-0.111619
5.71267	71.4968	12.1117	-1.41109	95.8825	-0.11171
5.721	71.5751	12.1105	-1.41226	95.8735	-0.111802
5.72933	71.6583	12.1094	-1.41345	95.8648	-0.111896
5.73767	71.7378	12.1083	-1.41465	95.8561	-0.111991
5.746	71.8181	12.1072	-1.41584	95.8474	-0.112085
5.75433	71.9028	12.1061	-1.41705	95.8387	-0.112181
5.76267	71.9823	12.1051	-1.41825	95.8301	-0.112276
5.771	72.065	12.1039	-1.4195	95.8212	-0.112375
5.77933	72.1428	12.1028	-1.42068	95.8118	-0.112468
5.78767	72.2256	12.1016	-1.4219	95.8026	-0.112565
5.796	72.3063	12.1004	-1.42312	95.7935	-0.112662
5.80433	72.3888	12.0993	-1.42432	95.7844	-0.112757
5.81267	72.4751	12.0981	-1.42551	95.7752	-0.112851
5.821	72.5531	12.097	-1.42669	95.7664	-0.112944
5.82933	72.6324	12.0959	-1.42787	95.7575	-0.113038
5.83767	72.7119	12.0947	-1.42906	95.7483	-0.113132
5.846	72.7984	12.0936	-1.43026	95.7391	-0.113227
5.85433	72.8755	12.0924	-1.43145	95.7298	-0.113321
5.86267	72.956	12.0912	-1.43265	95.7206	-0.113416
5.871	73.0369	12.09	-1.43384	95.7112	-0.11351
5.87933	73.1196	12.0889	-1.43507	95.7019	-0.113607
5.88767	73.1975	12.0877	-1.43631	95.6925	-0.113706
5.896	73.2795	12.0865	-1.43752	95.6832	-0.113802
5.90433	73.3646	12.0853	-1.43878	95.6736	-0.113901
5.91267	73.4487	12.0841	-1.44001	95.6643	-0.113999
5.921	73.5304	12.0829	-1.44123	95.6549	-0.114095
5.92933	73.6097	12.0818	-1.44246	95.6457	-0.114192
5.93767	73.6847	12.0806	-1.44368	95.6367	-0.11429
5.946	73.768	12.0795	-1.44496	95.6275	-0.114391
5.95433	73.8495	12.0783	-1.44621	95.6183	-0.11449
5.96267	73.9322	12.0771	-1.44743	95.609	-0.114586
5.971	74.0118	12.076	-1.44868	95.5998	-0.114685
5.97933	74.0939	12.0748	-1.44994	95.5904	-0.114785
5.98767	74.1762	12.0736	-1.45117	95.5808	-0.114882
5.996	74.2598	12.0724	-1.45246	95.5714	-0.114985
6.00433	74.3428	12.0712	-1.45376	95.5622	-0.115087
6.01267	74.4214	12.07	-1.45503	95.5527	-0.115188
6.021	74.5049	12.0688	-1.45629	95.543	-0.115288
6.02933	74.5866	12.0676	-1.45753	95.5333	-0.115386
6.03767	74.6656	12.0663	-1.45877	95.5237	-0.115484
6.046	74.75	12.0651	-1.46004	95.5142	-0.115584
6.05433	74.8294	12.064	-1.46128	95.5047	-0.115683
6.06267	74.9129	12.0627	-1.46257	95.4951	-0.115785
6.071	74.9955	12.0615	-1.46384	95.4854	-0.115885
6.07933	75.0767	12.0603	-1.46505	95.4756	-0.115982
6.08767	75.1561	12.059	-1.46632	95.4658	-0.116082
6.096	75.239	12.0578	-1.46759	95.4561	-0.116182
6.10433	75.3223	12.0566	-1.4689	95.4464	-0.116286
6.11267	75.4038	12.0553	-1.47022	95.4365	-0.11639
6.121	75.4825	12.0541	-1.47154	95.4268	-0.116495
6.12933	75.5643	12.0529	-1.47286	95.417	-0.116599
6.13767	75.6496	12.0516	-1.47417	95.4072	-0.116703
6.146	75.7284	12.0504	-1.4755	95.3973	-0.116808
6.15433	75.8112	12.0491	-1.47681	95.3874	-0.116912
6.16267	75.8919	12.0479	-1.47812	95.3774	-0.117016
6.171	75.9724	12.0466	-1.47939	95.3675	-0.117117
6.17933	76.0525	12.0453	-1.48072	95.3573	-0.117222
6.18767	76.1374	12.0441	-1.48205	95.3474	-0.117327
6.196	76.2179	12.0428	-1.48337	95.3376	-0.117432
6.20433	76.3002	12.0416	-1.48469	95.3276	-0.117536
6.21267	76.3802	12.0403	-1.486	95.3175	-0.11764
6.221	76.4647	12.039	-1.48729	95.3073	-0.117742
6.22933	76.546	12.0378	-1.48854	95.2974	-0.117841
6.23767	76.6277	12.0365	-1.48981	95.2875	-0.117941
6.246	76.7091	12.0353	-1.49113	95.2775	-0.118046
6.25433	76.7923	12.034	-1.49248	95.2675	-0.118153
6.26267	76.8764	12.0327	-1.49377	95.2576	-0.118255
6.271	76.9653	12.0315	-1.49509	95.2476	-0.118359
6.27933	77.0454	12.0302	-1.49641	95.2377	-0.118464
6.28767	77.129	12.029	-1.49775	95.2278	-0.11857
6.296	77.2091	12.0277	-1.49912	95.218	-0.118678
6.30433	77.2885	12.0265	-1.50048	95.208	-0.118786
6.31267	77.378	12.0252	-1.50185	95.1978	-0.118894
6.321	77.455	12.0239	-1.50324	95.1876	-0.119005
6.32933	77.5397	12.0226	-1.50459	95.1776	-0.119112
6.33767	77.6158	12.0213	-1.50598	95.1674	-0.119222
6.346	77.6968	12.0201	-1.50737	95.1574	-0.119332
6.35433	77.7793	12.0188	-1.50874	95.1472	-0.11944
6.36267	77.8619	12.0175	-1.51011	95.137	-0.119548
6.371	77.9467	12.0162	-1.51144	95.1267	-0.119654
6.37933	78.0245	12.0149	-1.51281	95.1164	-0.119762
6.38767	78.1081	12.0136	-1.51417	95.1062	-0.11987
6.396	78.1898	12.0123	-1.51555	95.0958	-0.119979
6.40433	78.2729	12.011	-1.51696	95.0855	-0.12009
6.41267	78.3531	12.0097	-1.51838	95.0751	-0.120203
6.421	78.4337	12.0084	-1.51977	95.0648	-0.120313
6.42933	78.5187	12.0071	-1.52117	95.0543	-0.120424
6.43767	78.599	12.0057	-1.52255	95.0439	-0.120533
6.446	78.6788	12.0044	-1.52395	95.0331	-0.120644
6.45433	78.7638	12.003	-1.52539	95.0224	-0.120758
6.46267	78.8466	12.0017	-1.5268	95.0116	-0.12087
6.471	78.931	12.0003	-1.52822	95.001	-0.120982
6.47933	79.0157	11.999	-1.52965	94.9907	-0.121095
6.48767	79.0921	11.9977	-1.53106	94.9799	-0.121207
6.496	79.1759	11.9963	-1.53247	94.9693	-0.121319
6.50433	79.2578	11.995	-1.53389	94.9588	-0.121431
6.51267	79.335	11.9936	-1.53532	94.9478	-0.121544
6.521	79.4195	11.9922	-1.53677	94.9369	-0.121659
6.52933	79.5053	11.9909	-1.53822	94.9262	-0.121774
6.53767	79.5844	11.9895	-1.53968	94.9154	-0.121889
6.546	79.6661	11.9882	-1.5411	94.9047	-0.122002
6.55433	79.7442	11.9868	-1.54257	94.8938	-0.122118
6.56267	79.8304	11.9854	-1.54402	94.8829	-0.122233
6.571	79.9124	11.9841	-1.5455	94.8723	-0.12235
6.57933	79.9948	11.9827	-1.547	94.8614	-0.122469
6.58767	80.0782	11.9813	-1.54851	94.8505	-0.122588
6.596	80.1578	11.98	-1.55	94.8398	-0.122706
6.60433	80.2383	11.9786	-1.55153	94.8289	-0.122827
6.61267	80.3264	11.9772	-1.55299	94.8182	-0.122943
6.621	80.4054	11.9759	-1.55448	94.8075	-0.123061
6.62933	80.4852	11.9745	-1.556	94.7969	-0.123181
6.63767	80.5724	11.9732	-1.5575	94.7862	-0.1233
6.646	80.656	11.9718	-1.559	94.7755	-0.123419
6.65433	80.7327	11.9705	-1.56051	94.7646	-0.123538
6.66267	80.8145	11.9691	-1.56201	94.7536	-0.123657
6.671	80.8964	11.9677	-1.56347	94.7426	-0.123773
6.67933	80.9794	11.9663	-1.56495	94.7315	-0.12389
6.68767	81.0578	11.9649	-1.56641	94.7206	-0.124005
6.696	81.1432	11.9635	-1.5679	94.7096	-0.124123
6.70433	81.2217	11.9621	-1.56939	94.6984	-0.124241
6.71267	81.3061	11.9607	-1.57088	94.6872	-0.124359
6.721	81.3899	11.9593	-1.57236	94.6762	-0.124477
6.72933	81.4743	11.9579	-1.57387	94.6651	-0.124596
6.73767	81.5548	11.9565	-1.57537	94.654	-0.124715
6.746	81.6365	11.9551	-1.57689	94.6427	-0.124835
6.75433	81.7199	11.9536	-1.57838	94.6314	-0.124953
6.76267	81.8021	11.9522	-1.57987	94.6202	-0.125071
6.771	81.8802	11.9508	-1.58139	94.6089	-0.125191
6.77933	81.9657	11.9494	-1.58291	94.5978	-0.125311
6.78767	82.048	11.948	-1.5844	94.5868	-0.125429
6.796	82.1283	11.9466	-1.58592	94.5755	-0.12555
6.80433	82.2102	11.9451	-1.58744	94.5641	-0.125671
6.81267	82.2947	11.9437	-1.58893	94.5526	-0.125789
6.821	82.3771	11.9422	-1.59042	94.5411	-0.125906
6.82933	82.4601	11.9408	-1.59185	94.5299	-0.126019
6.83767	82.5441	11.9394	-1.59337	94.5187	-0.12614
6.846	82.6262	11.938	-1.59487	94.5074	-0.126259
6.85433	82.7019	11.9366	-1.59634	94.4963	-0.126374
6.86267	82.7867	11.9351	-1.59782	94.4847	-0.126492
6.871	82.8682	11.9337	-1.5993	94.4732	-0.126609
6.87933	82.9507	11.9322	-1.60075	94.4618	-0.126724
6.88767	83.0329	11.9308	-1.60215	94.4505	-0.126835
6.896	83.1104	11.9294	-1.60359	94.4392	-0.126949
6.90433	83.1927	11.928	-1.60503	94.4281	-0.127063
6.91267	83.2759	11.9265	-1.60647	94.4166	-0.127177
6.921	83.3613	11.9251	-1.60787	94.4051	-0.127288
6.92933	83.4425	11.9236	-1.60927	94.3936	-0.127399
6.93767	83.5259	11.9221	-1.61069	94.382	-0.127511
6.946	83.6052	11.9207	-1.61209	94.3704	-0.127622
6.95433	83.6872	11.9192	-1.6135	94.3591	-0.127733
6.96267	83.7699	11.9178	-1.61488	94.3477	-0.127842
6.971	83.8533	11.9163	-1.61631	94.336	-0.127955
6.97933	83.9341	11.9149	-1.61768	94.3244	-0.128064
6.98767	84.0192	11.9134	-1.61906	94.3126	-0.128173
6.996	84.0972	11.9119	-1.62043	94.3006	-0.128282
7.00433	84.1805	11.9104	-1.6218	94.2893	-0.12839
7.01267	84.2601	11.909	-1.62315	94.278	-0.128497
7.021	84.3417	11.9076	-1.62449	94.2665	-0.128603
7.02933	84.4261	11.9061	-1.6258	94.2551	-0.128707
7.03767	84.5074	11.9046	-1.62711	94.2435	-0.12881
7.046	84.5856	11.9032	-1.62841	94.2319	-0.128914
7.05433	84.6712	11.9017	-1.6297	94.2202	-0.129016
7.06267	84.7562	11.9003	-1.63101	94.2089	-0.129119
7.071	84.8342	11.8988	-1.63227	94.1976	-0.129219
7.07933	84.9189	11.8974	-1.63355	94.186	-0.12932
7.08767	84.9972	11.8959	-1.63482	94.1744	-0.129421
7.096	85.0822	11.8944	-1.63607	94.1627	-0.12952
7.10433	85.1625	11.893	-1.6373	94.1513	-0.129618
7.11267	85.2441	11.8916	-1.63852	94.1399	-0.129714
7.121	85.3298	11.8901	-1.63974	94.1287	-0.129811
7.12933	85.4101	11.8887	-1.64093	94.1175	-0.129905
7.13767	85.4973	11.8873	-1.64208	94.1062	-0.129996
7.146	85.5814	11.8859	-1.64321	94.0948	-0.130086
7.15433	85.6638	11.8844	-1.64433	94.0834	-0.130174
7.16267	85.7454	11.883	-1.64541	94.0723	-0.13026
7.171	85.8228	11.8816	-1.64646	94.0612	-0.130342
7.17933	85.9083	11.8802	-1.64751	94.0499	-0.130426
7.18767	85.9916	11.8787	-1.64852	94.0384	-0.130506
7.196	86.0735	11.8773	-1.64953	94.0269	-0.130586
7.20433	86.1567	11.8758	-1.65048	94.0154	-0.130661
7.21267	86.2374	11.8744	-1.65143	94.0039	-0.130736
7.221	86.3174	11.8729	-1.65242	93.9923	-0.130814
7.22933	86.4003	11.8715	-1.65336	93.9808	-0.130888
7.23767	86.4799	11.87	-1.65425	93.9695	-0.130959
7.246	86.5675	11.8686	-1.65515	93.9583	-0.13103
7.25433	86.6486	11.8672	-1.65603	93.9469	-0.1311
7.26267	86.7355	11.8658	-1.65684	93.9357	-0.131165
7.271	86.8131	11.8643	-1.65768	93.9245	-0.13123
7.27933	86.8931	11.8629	-1.65848	93.9131	-0.131294
7.28767	86.9768	11.8615	-1.65924	93.9021	-0.131354
7.296	87.0628	11.8601	-1.65998	93.891	-0.131413
7.30433	87.1454	11.8587	-1.66067	93.8801	-0.131467
7.31267	87.229	11.8574	-1.66134	93.8694	-0.131521
7.321	87.3117	11.856	-1.66199	93.8584	-0.131572
7.32933	87.3944	11.8546	-1.66259	93.8474	-0.13162
7.33767	87.4779	11.8532	-1.66315	93.8364	-0.131664
7.346	87.5597	11.8518	-1.66368	93.8254	-0.131706
7.35433	87.6445	11.8505	-1.66416	93.8146	-0.131744
7.36267	87.7283	11.8491	-1.66461	93.804	-0.131779
7.371	87.807	11.8477	-1.66506	93.793	-0.131815
7.37933	87.8943	11.8463	-1.66548	93.782	-0.131848
7.38767	87.9768	11.845	-1.66587	93.771	-0.131879
7.396	88.0568	11.8436	-1.66618	93.76	-0.131904
7.40433	88.1429	11.8422	-1.66647	93.7493	-0.131927
7.41267	88.2245	11.8409	-1.66676	93.7387	-0.131949
7.421	88.3055	11.8395	-1.667	93.7282	-0.131969
7.42933	88.3909	11.8382	-1.66724	93.7178	-0.131988
7.43767	88.4721	11.8369	-1.66747	93.7073	-0.132006
7.446	88.5586	11.8355	-1.66763	93.6965	-0.132018
7.45433	88.6393	11.8342	-1.66779	93.6859	-0.132031
7.46267	88.7209	11.8329	-1.6679	93.6755	-0.13204
7.471	88.8074	11.8316	-1.66793	93.6651	-0.132042
7.47933	88.8866	11.8303	-1.66794	93.6548	-0.132043
7.48767	88.9723	11.829	-1.66795	93.6444	-0.132044
7.496	89.056	11.8276	-1.66794	93.6338	-0.132043
7.50433	89.1394	11.8263	-1.66788	93.6232	-0.132038
7.51267	89.2204	11.825	-1.66775	93.6128	-0.132028
7.521	89.3003	11.8237	-1.66755	93.6026	-0.132012
7.52933	89.3861	11.8224	-1.66737	93.5924	-0.131998
7.53767	89.4717	11.8211	-1.66714	93.5823	-0.131979
7.546	89.5543	11.8199	-1.66684	93.5726	-0.131956
7.55433	89.6414	11.8187	-1.66658	93.5628	-0.131936
7.56267	89.72	11.8174	-1.66632	93.553	-0.131914
7.571	89.8084	11.8162	-1.666	93.543	-0.131889
7.57933	89.8912	11.8149	-1.66563	93.5334	-0.13186
7.58767	89.9717	11.8137	-1.66527	93.5237	-0.131831
7.596	90.0579	11.8125	-1.66488	93.5142	-0.131801
7.60433	90.1384	11.8113	-1.66445	93.5046	-0.131766
7.61267	90.2236	11.8101	-1.66395	93.4951	-0.131727
7.621	90.3132	11.8089	-1.66343	93.4859	-0.131686
7.62933	90.393	11.8077	-1.66287	93.4761	-0.131642
7.63767	90.4766	11.8065	-1.66226	93.4663	-0.131593
7.646	90.5581	11.8053	-1.6616	93.4567	-0.131541
7.65433	90.6459	11.8041	-1.66091	93.4473	-0.131487
7.66267	90.7277	11.8029	-1.66018	93.4379	-0.131429
7.671	90.8139	11.8017	-1.65944	93.4286	-0.13137
7.67933	90.8932	11.8005	-1.65867	93.4192	-0.131309
7.68767	90.9791	11.7993	-1.6579	93.4096	-0.131248
7.696	91.0654	11.7981	-1.65709	93.4002	-0.131184
7.70433	91.1487	11.7969	-1.65624	93.3907	-0.131117
7.71267	91.23	11.7958	-1.65541	93.3815	-0.131051
7.721	91.3149	11.7946	-1.65455	93.3726	-0.130983
7.72933	91.4008	11.7935	-1.65369	93.3635	-0.130915
7.73767	91.482	11.7923	-1.65279	93.3543	-0.130844
7.746	91.5645	11.7912	-1.65186	93.3454	-0.13077
7.75433	91.6536	11.79	-1.65089	93.3363	-0.130693
7.76267	91.7379	11.7889	-1.64992	93.3272	-0.130617
7.771	91.8164	11.7878	-1.64891	93.3185	-0.130537
7.77933	91.9057	11.7867	-1.64792	93.3097	-0.130458
7.78767	91.9876	11.7856	-1.6469	93.3009	-0.130378
7.796	92.0704	11.7844	-1.64586	93.2919	-0.130295
7.80433	92.1567	11.7833	-1.6448	93.2828	-0.130211
7.81267	92.2371	11.7822	-1.64365	93.2742	-0.13012
7.821	92.3252	11.7811	-1.64253	93.2653	-0.130031
7.82933	92.4068	11.78	-1.64141	93.2565	-0.129943
7.83767	92.4929	11.7789	-1.64028	93.2479	-0.129854
7.846	92.5748	11.7778	-1.63908	93.2392	-0.129758
7.85433	92.6567	11.7767	-1.63789	93.2306	-0.129664
7.86267	92.7425	11.7756	-1.63668	93.2222	-0.129568
7.871	92.8268	11.7745	-1.63543	93.2136	-0.129469
7.87933	92.9099	11.7735	-1.63415	93.2051	-0.129368
7.88767	92.9988	11.7724	-1.63287	93.1966	-0.129267
7.896	93.083	11.7713	-1.6316	93.1881	-0.129166
7.90433	93.1687	11.7702	-1.63029	93.1795	-0.129063
7.91267	93.2507	11.7692	-1.62894	93.171	-0.128956
7.921	93.3365	11.7681	-1.6276	93.1623	-0.12885
7.92933	93.421	11.767	-1.6263	93.1541	-0.128747
7.93767	93.5075	11.766	-1.62495	93.1457	-0.128639
7.946	93.594	11.7649	-1.62354	93.1372	-0.128528
7.95433	93.6765	11.7638	-1.62214	93.1288	-0.128417
7.96267	93.7629	11.7628	-1.62074	93.1205	-0.128306
7.971	93.8459	11.7617	-1.61934	93.1121	-0.128195
7.97933	93.9317	11.7607	-1.61796	93.1039	-0.128086
7.98767	94.011	11.7597	-1.61654	93.0959	-0.127974
7.996	94.0966	11.7587	-1.61518	93.0878	-0.127866
8.00433	94.1832	11.7576	-1.61377	93.0798	-0.127754
8.01267	94.2669	11.7566	-1.61231	93.0714	-0.127639
8.021	94.3526	11.7555	-1.61089	93.0632	-0.127527
8.02933	94.4345	11.7546	-1.60944	93.0554	-0.127412
8.03767	94.5203	11.7535	-1.608	93.0473	-0.127298
8.046	94.6051	11.7525	-1.60656	93.0394	-0.127184
8.05433	94.688	11.7515	-1.60509	93.0313	-0.127068
8.06267	94.7745	11.7505	-1.60363	93.0232	-0.126952
8.071	94.8587	11.7495	-1.60217	93.0152	-0.126836
8.07933	94.9424	11.7485	-1.60065	93.0072	-0.126716
8.08767	95.0242	11.7475	-1.59915	92.9992	-0.126597
8.096	95.1088	11.7465	-1.59767	92.9913	-0.12648
8.10433	95.1954	11.7454	-1.59615	92.9832	-0.12636
8.11267	95.2861	11.7444	-1.59466	92.9752	-0.126242
8.121	95.3657	11.7434	-1.59318	92.967	-0.126125
8.12933	95.4504	11.7424	-1.59169	92.9589	-0.126007
8.13767	95.534	11.7414	-1.59018	92.9509	-0.125887
8.146	95.6169	11.7404	-1.58866	92.943	-0.125767
8.15433	95.7019	11.7394	-1.58716	92.9354	-0.125648
8.16267	95.785	11.7384	-1.58566	92.9274	-0.125529
8.171	95.8699	11.7374	-1.58413	92.9196	-0.125408
8.17933	95.9553	11.7364	-1.5826	92.9116	-0.125287
8.18767	96.0374	11.7354	-1.5811	92.9039	-0.125168
8.196	96.1236	11.7344	-1.57958	92.896	-0.125048
8.20433	96.2083	11.7335	-1.57805	92.8883	-0.124927
8.21267	96.2946	11.7325	-1.57653	92.8807	-0.124806
8.221	96.3773	11.7315	-1.57499	92.8731	-0.124685
8.22933	96.4626	11.7306	-1.57345	92.8655	-0.124562
8.23767	96.5473	11.7296	-1.57187	92.8578	-0.124438
8.246	96.6299	11.7286	-1.57035	92.8501	-0.124318
8.25433	96.716	11.7277	-1.56881	92.8424	-0.124196
8.26267	96.8007	11.7267	-1.56726	92.8347	-0.124073
8.271	96.8853	11.7258	-1.56571	92.8274	-0.12395
8.27933	96.9665	11.7248	-1.56416	92.8199	-0.123827
8.28767	97.0502	11.7239	-1.56261	92.8123	-0.123705
8.296	97.1409	11.7229	-1.56107	92.8049	-0.123583
8.30433	97.2251	11.722	-1.55953	92.7975	-0.12346
8.31267	97.3098	11.721	-1.558	92.7899	-0.123339
8.321	97.3883	11.7201	-1.55648	92.7824	-0.123219
8.32933	97.4766	11.7191	-1.55493	92.775	-0.123096
8.33767	97.5593	11.7182	-1.55342	92.7676	-0.122977
8.346	97.6443	11.7173	-1.55191	92.7604	-0.122858
8.35433	97.7334	11.7163	-1.5504	92.7528	-0.122738
8.36267	97.8149	11.7154	-1.54888	92.7452	-0.122618
8.371	97.8974	11.7144	-1.54737	92.7377	-0.122498
8.37933	97.9811	11.7135	-1.54584	92.7302	-0.122377
8.38767	98.0681	11.7125	-1.54431	92.7227	-0.122256
8.396	98.1502	11.7116	-1.54276	92.7154	-0.122133
8.40433	98.2357	11.7107	-1.54122	92.708	-0.122011
8.41267	98.3214	11.7097	-1.53966	92.7006	-0.121888
8.421	98.4052	11.7088	-1.53808	92.6934	-0.121763
8.42933	98.4962	11.7079	-1.53654	92.6862	-0.121641
8.43767	98.5795	11.707	-1.535	92.6789	-0.121519
8.446	98.6596	11.706	-1.5335	92.6713	-0.1214
8.45433	98.747	11.7051	-1.53199	92.6641	-0.121281
8.46267	98.8287	11.7042	-1.53048	92.657	-0.121161
8.471	98.9143	11.7033	-1.52897	92.6497	-0.121041
8.47933	98.9942	11.7024	-1.52748	92.6424	-0.120924
8.48767	99.0819	11.7015	-1.526	92.6352	-0.120806
8.496	99.1702	11.7006	-1.5245	92.6279	-0.120688
8.50433	99.2526	11.6996	-1.52302	92.6206	-0.120571
8.51267	99.3318	11.6987	-1.52153	92.6133	-0.120452
8.521	99.4197	11.6978	-1.52001	92.606	-0.120332
8.52933	99.5009	11.6969	-1.51848	92.5991	-0.120211
8.53767	99.5846	11.696	-1.51698	92.592	-0.120092
8.546	99.6718	11.6951	-1.51549	92.5848	-0.119974
8.55433	99.7563	11.6942	-1.51402	92.5776	-0.119858
8.56267	99.8405	11.6933	-1.51253	92.5704	-0.11974
8.571	99.9293	11.6924	-1.51105	92.563	-0.119623
8.57933	100.012	11.6914	-1.50964	92.5557	-0.119511
8.58767	100.094	11.6905	-1.50821	92.5483	-0.119398
8.596	100.173	11.6896	-1.50675	92.5413	-0.119282
8.60433	100.262	11.6888	-1.50531	92.5344	-0.119169
8.61267	100.35	11.6878	-1.50388	92.5269	-0.119055
8.621	100.43	11.6869	-1.50244	92.5196	-0.118941
8.62933	100.518	11.686	-1.50098	92.5123	-0.118826
8.63767	100.602	11.6851	-1.49954	92.5052	-0.118712
8.646	100.688	11.6842	-1.49811	92.4981	-0.118598
8.65433	100.768	11.6833	-1.49667	92.4911	-0.118485
8.66267	100.854	11.6824	-1.49521	92.4844	-0.118369
8.671	100.942	11.6815	-1.49376	92.4774	-0.118254
8.67933	101.025	11.6807	-1.49234	92.4703	-0.118141
8.68767	101.113	11.6797	-1.49091	92.4631	-0.118028
8.696	101.199	11.6789	-1.48952	92.4562	-0.117918
8.70433	101.28	11.678	-1.48811	92.4491	-0.117807
8.71267	101.367	11.6771	-1.48674	92.4422	-0.117698
8.721	101.452	11.6762	-1.48535	92.4353	-0.117589
8.72933	101.537	11.6754	-1.48396	92.4284	-0.117478
8.73767	101.62	11.6745	-1.48258	92.4215	-0.117369
8.746	101.704	11.6736	-1.4812	92.4146	-0.11726
8.75433	101.788	11.6727	-1.47981	92.4076	-0.117149
8.76267	101.874	11.6718	-1.47842	92.4006	-0.11704
8.771	101.956	11.671	-1.47706	92.394	-0.116932
8.77933	102.045	11.6702	-1.4757	92.3872	-0.116824
8.78767	102.127	11.6693	-1.47433	92.3806	-0.116716
8.796	102.216	11.6685	-1.47294	92.3741	-0.116606
8.80433	102.299	11.6676	-1.47154	92.3673	-0.116495
8.81267	102.382	11.6668	-1.47016	92.3605	-0.116386
8.821	102.465	11.6659	-1.46878	92.3535	-0.116276
8.82933	102.551	11.665	-1.46742	92.3465	-0.116169
8.83767	102.635	11.6642	-1.46608	92.34	-0.116062
8.846	102.718	11.6634	-1.46476	92.3334	-0.115958
8.85433	102.805	11.6625	-1.46342	92.3266	-0.115852
8.86267	102.888	11.6616	-1.46206	92.3198	-0.115745
8.871	102.972	11.6608	-1.46073	92.3128	-0.115639
8.87933	103.057	11.6598	-1.45939	92.3055	-0.115533
8.88767	103.142	11.659	-1.45807	92.2986	-0.115429
8.896	103.226	11.6581	-1.45674	92.2915	-0.115323
8.90433	103.314	11.6572	-1.45542	92.2845	-0.115219
8.91267	103.395	11.6563	-1.45406	92.2776	-0.115111
8.921	103.481	11.6554	-1.45274	92.2707	-0.115007
8.92933	103.565	11.6546	-1.45141	92.2637	-0.114902
8.93767	103.653	11.6537	-1.45008	92.2571	-0.114796
8.946	103.733	11.6529	-1.44875	92.2506	-0.114691
8.95433	103.819	11.6521	-1.44741	92.2439	-0.114585
8.96267	103.906	11.6512	-1.44609	92.2373	-0.11448
8.971	103.988	11.6503	-1.44481	92.2303	-0.114379
8.97933	104.075	11.6495	-1.4435	92.2235	-0.114275
8.98767	104.16	11.6486	-1.44217	92.2169	-0.11417
8.996	104.245	11.6478	-1.44091	92.2102	-0.11407
9.00433	104.326	11.647	-1.43962	92.2036	-0.113968
9.01267	104.412	11.6461	-1.43832	92.1971	-0.113865
9.021	104.496	11.6453	-1.43704	92.1903	-0.113763
9.02933	104.579	11.6444	-1.43575	92.1835	-0.113662
9.03767	104.667	11.6436	-1.43448	92.1766	-0.113561
9.046	104.751	11.6427	-1.43324	92.1699	-0.113463
9.05433	104.836	11.6419	-1.43195	92.1633	-0.113361
9.06267	104.917	11.6411	-1.4307	92.1569	-0.113262
9.071	104.999	11.6402	-1.42945	92.1504	-0.113163
9.07933	105.084	11.6395	-1.42817	92.1441	-0.113062
9.08767	105.168	11.6386	-1.42689	92.1375	-0.11296
9.096	105.252	11.6378	-1.42561	92.1308	-0.112859
9.10433	105.342	11.6369	-1.42435	92.1241	-0.112759
9.11267	105.424	11.6361	-1.42311	92.1173	-0.112661
9.121	105.509	11.6352	-1.42183	92.1107	-0.11256
9.12933	105.594	11.6344	-1.42054	92.1044	-0.112458
9.13767	105.677	11.6336	-1.41926	92.0982	-0.112356
9.146	105.762	11.6329	-1.41799	92.092	-0.112256
9.15433	105.85	11.6321	-1.41675	92.0858	-0.112158
9.16267	105.93	11.6312	-1.41548	92.0792	-0.112057
9.171	106.017	11.6304	-1.41425	92.0725	-0.111959
9.17933	106.1	11.6296	-1.413	92.0658	-0.111861
9.18767	106.182	11.6287	-1.41177	92.0593	-0.111764
9.196	106.271	11.628	-1.41052	92.0531	-0.111664
9.20433	106.358	11.6272	-1.40931	92.047	-0.111568
9.21267	106.441	11.6264	-1.40809	92.0404	-0.111472
9.221	106.524	11.6256	-1.40691	92.0341	-0.111379
9.22933	106.61	11.6247	-1.40569	92.0277	-0.111282
9.23767	106.699	11.6239	-1.40448	92.0211	-0.111186
9.246	106.78	11.6231	-1.40328	92.0148	-0.111091
9.25433	106.866	11.6224	-1.40205	92.0088	-0.110993
9.26267	106.949	11.6216	-1.40085	92.0026	-0.110899
9.271	107.033	11.6208	-1.39963	91.9964	-0.110802
9.27933	107.124	11.62	-1.39843	91.99	-0.110707
9.28767	107.206	11.6192	-1.39723	91.9836	-0.110612
9.296	107.29	11.6184	-1.396	91.9774	-0.110515
9.30433	107.372	11.6176	-1.39474	91.9711	-0.110415
9.31267	107.458	11.6168	-1.39354	91.965	-0.11032
9.321	107.544	11.616	-1.39233	91.9587	-0.110224
9.32933	107.628	11.6152	-1.39112	91.9521	-0.110129
9.33767	107.715	11.6144	-1.38993	91.9455	-0.110034
9.346	107.794	11.6136	-1.38871	91.9394	-0.109938
9.35433	107.874	11.6128	-1.38752	91.933	-0.109844
9.36267	107.963	11.612	-1.3863	91.9266	-0.109747
9.371	108.05	11.6112	-1.38511	91.9203	-0.109653
9.37933	108.132	11.6104	-1.38397	91.914	-0.109562
9.38767	108.214	11.6096	-1.38281	91.9074	-0.109471
9.396	108.303	11.6087	-1.38162	91.9008	-0.109376
9.40433	108.385	11.6079	-1.38044	91.8943	-0.109283
9.41267	108.467	11.6071	-1.37927	91.8882	-0.109191
9.421	108.55	11.6064	-1.37811	91.8822	-0.109099
9.42933	108.638	11.6056	-1.37697	91.8761	-0.109008
9.43767	108.724	11.6048	-1.37578	91.8699	-0.108914
9.446	108.806	11.6041	-1.37461	91.8639	-0.108822
9.45433	108.893	11.6033	-1.37345	91.8579	-0.108729
9.46267	108.976	11.6026	-1.3723	91.852	-0.108639
9.471	109.062	11.6018	-1.37115	91.8461	-0.108548
9.47933	109.143	11.6011	-1.37003	91.8402	-0.108459
9.48767	109.228	11.6003	-1.3689	91.8342	-0.10837
9.496	109.316	11.5995	-1.36774	91.8279	-0.108278
9.50433	109.4	11.5987	-1.36662	91.8217	-0.108189
9.51267	109.485	11.5979	-1.36548	91.8154	-0.108099
9.521	109.572	11.5972	-1.36436	91.8093	-0.10801
9.52933	109.655	11.5964	-1.36326	91.8031	-0.107923
9.53767	109.742	11.5956	-1.36216	91.7966	-0.107835
9.546	109.824	11.5947	-1.36098	91.7902	-0.107742
9.55433	109.91	11.5939	-1.35983	91.7838	-0.107651
9.56267	109.992	11.5931	-1.35867	91.7776	-0.10756
9.571	110.075	11.5924	-1.35754	91.7716	-0.10747
9.57933	110.162	11.5916	-1.35644	91.7656	-0.107383
9.58767	110.246	11.5909	-1.35532	91.7597	-0.107294
9.596	110.329	11.5901	-1.35419	91.7537	-0.107205
9.60433	110.418	11.5894	-1.35307	91.7477	-0.107116
9.61267	110.502	11.5886	-1.35196	91.7419	-0.107028
9.621	110.586	11.5879	-1.35083	91.7359	-0.106939
9.62933	110.672	11.5872	-1.34973	91.7303	-0.106852
9.63767	110.755	11.5865	-1.34865	91.7246	-0.106766
9.646	110.839	11.5857	-1.34757	91.7189	-0.106681
9.65433	110.922	11.585	-1.34648	91.713	-0.106595
9.66267	111.011	11.5842	-1.34538	91.707	-0.106507
9.671	111.093	11.5835	-1.34428	91.7011	-0.106421
9.67933	111.177	11.5828	-1.3432	91.6953	-0.106335
9.68767	111.261	11.582	-1.34212	91.6894	-0.10625
9.696	111.344	11.5813	-1.34101	91.6838	-0.106162
9.70433	111.428	11.5806	-1.3399	91.6779	-0.106073
9.71267	111.515	11.5798	-1.33882	91.6718	-0.105988
9.721	111.6	11.579	-1.33774	91.6656	-0.105902
9.72933	111.682	11.5782	-1.33665	91.6594	-0.105816
9.73767	111.766	11.5775	-1.33555	91.6534	-0.105729
9.746	111.853	11.5767	-1.33449	91.6475	-0.105645
9.75433	111.938	11.5759	-1.33339	91.6413	-0.105558
9.76267	112.022	11.5752	-1.33227	91.6352	-0.10547
9.771	112.11	11.5744	-1.3312	91.6291	-0.105385
9.77933	112.192	11.5736	-1.33015	91.6227	-0.105302
9.78767	112.278	11.5728	-1.32909	91.6166	-0.105218
9.796	112.364	11.5721	-1.32802	91.6106	-0.105133
9.80433	112.445	11.5713	-1.32693	91.6048	-0.105047
9.81267	112.529	11.5706	-1.32585	91.5991	-0.104962
9.821	112.613	11.5698	-1.32478	91.593	-0.104876
9.82933	112.696	11.5691	-1.3237	91.5871	-0.104791
9.83767	112.782	11.5684	-1.32262	91.5813	-0.104706
9.846	112.866	11.5676	-1.32159	91.5753	-0.104624
9.85433	112.951	11.5669	-1.32054	91.5696	-0.104541
9.86267	113.04	11.5662	-1.31947	91.5641	-0.104457
9.871	113.124	11.5655	-1.31841	91.5584	-0.104373
9.87933	113.204	11.5648	-1.31736	91.5528	-0.10429
9.88767	113.286	11.564	-1.31632	91.5471	-0.104207
9.896	113.375	11.5633	-1.31529	91.5413	-0.104125
9.90433	113.457	11.5626	-1.31428	91.5357	-0.104045
9.91267	113.54	11.5619	-1.31324	91.5301	-0.103963
9.921	113.622	11.5612	-1.31225	91.5246	-0.103885
9.92933	113.71	11.5605	-1.31122	91.5193	-0.103803
9.93767	113.794	11.5598	-1.31018	91.5134	-0.103721
9.946	113.879	11.559	-1.3092	91.5075	-0.103643
9.95433	113.962	11.5583	-1.3082	91.5017	-0.103564
9.96267	114.044	11.5576	-1.30717	91.4958	-0.103483
9.971	114.136	11.5568	-1.30617	91.49	-0.103403
9.97933	114.217	11.5561	-1.30515	91.4843	-0.103323
9.98767	114.302	11.5554	-1.30409	91.4787	-0.103239
9.996	114.381	11.5547	-1.30307	91.4729	-0.103158
10.0043	114.468	11.5539	-1.30203	91.4668	-0.103076
10.0127	114.553	11.5531	-1.30099	91.4608	-0.102994
10.021	114.635	11.5524	-1.29999	91.4552	-0.102914
10.0293	114.72	11.5517	-1.29892	91.4494	-0.10283
10.0377	114.805	11.551	-1.29788	91.4436	-0.102747
10.046	114.888	11.5502	-1.29687	91.4379	-0.102667
10.0543	114.97	11.5495	-1.29588	91.4324	-0.102588
10.0627	115.054	11.5488	-1.29484	91.4268	-0.102506
10.071	115.142	11.5481	-1.29389	91.421	-0.102431
10.0793	115.222	11.5474	-1.29289	91.4155	-0.102352
10.0877	115.305	11.5467	-1.2919	91.4099	-0.102274
10.096	115.388	11.546	-1.29091	91.4044	-0.102195
10.1043	115.475	11.5453	-1.28991	91.3987	-0.102117
10.1127	115.558	11.5446	-1.28893	91.3932	-0.102039
10.121	115.644	11.5439	-1.28798	91.3878	-0.101963
10.1293	115.727	11.5432	-1.28701	91.3821	-0.101886
10.1377	115.813	11.5425	-1.28602	91.3764	-0.101808
10.146	115.896	11.5418	-1.28506	91.3707	-0.101732
10.1543	115.983	11.541	-1.28409	91.365	-0.101655
10.1627	116.067	11.5403	-1.28313	91.3593	-0.10158
10.171	116.15	11.5396	-1.28216	91.3536	-0.101503
10.1793	116.233	11.5389	-1.28121	91.3481	-0.101427
10.1877	116.321	11.5382	-1.28024	91.3424	-0.101351
10.196	116.405	11.5375	-1.2793	91.3369	-0.101276
10.2043	116.49	11.5368	-1.27835	91.3313	-0.101201
10.2127	116.571	11.5361	-1.27739	91.3256	-0.101125
10.221	116.662	11.5354	-1.27644	91.3202	-0.10105
10.2293	116.745	11.5347	-1.2755	91.3148	-0.100975
10.2377	116.832	11.534	-1.27452	91.3093	-0.100898
10.246	116.912	11.5333	-1.27356	91.3038	-0.100822
10.2543	116.994	11.5326	-1.27263	91.2984	-0.100748
10.2627	117.078	11.5319	-1.27171	91.2929	-0.100675
10.271	117.163	11.5312	-1.27078	91.2875	-0.100602
10.2793	117.247	11.5306	-1.26983	91.2821	-0.100526
10.2877	117.335	11.5298	-1.26889	91.2765	-0.100452
10.296	117.417	11.5292	-1.26794	91.2712	-0.100377
10.3043	117.504	11.5285	-1.26699	91.2659	-0.100302
10.3127	117.588	11.5278	-1.26604	91.2605	-0.100226
10.321	117.67	11.5272	-1.26508	91.2552	-0.10015
10.3293	117.756	11.5265	-1.26414	91.2499	-0.100076
10.3377	117.836	11.5258	-1.26321	91.2445	-0.100002
10.346	117.92	11.5251	-1.26227	91.239	-0.0999282
10.3543	118.007	11.5245	-1.26134	91.2338	-0.0998548
10.3627	118.089	11.5238	-1.26044	91.2284	-0.0997829
10.371	118.175	11.5231	-1.25951	91.223	-0.0997093
10.3793	118.258	11.5224	-1.25859	91.2176	-0.0996369
10.3877	118.344	11.5218	-1.25771	91.2124	-0.0995667
10.396	118.425	11.5211	-1.25679	91.2071	-0.0994944
10.4043	118.508	11.5204	-1.25592	91.2018	-0.099425
10.4127	118.594	11.5198	-1.25501	91.1968	-0.0993535
10.421	118.682	11.5191	-1.25409	91.1917	-0.0992808
10.4293	118.766	11.5185	-1.25319	91.1864	-0.0992091
10.4377	118.849	11.5178	-1.25226	91.1811	-0.099136
10.446	118.938	11.5171	-1.25133	91.1758	-0.0990623
10.4543	119.016	11.5165	-1.25044	91.1705	-0.0989918
10.4627	119.102	11.5158	-1.24953	91.1652	-0.0989193
10.471	119.189	11.5151	-1.24861	91.1598	-0.0988469
10.4793	119.272	11.5144	-1.24774	91.1543	-0.0987774
10.4877	119.358	11.5137	-1.24686	91.149	-0.0987082
10.496	119.439	11.513	-1.24598	91.1435	-0.0986388
10.5043	119.524	11.5123	-1.2451	91.1378	-0.0985688
10.5127	119.609	11.5116	-1.24422	91.1322	-0.0984991
10.521	119.692	11.5109	-1.24338	91.1266	-0.098433
10.5293	119.774	11.5102	-1.24254	91.1212	-0.0983664
10.5377	119.863	11.5096	-1.24164	91.1157	-0.098295
10.546	119.944	11.5088	-1.2408	91.1101	-0.098228
10.5543	120.032	11.5082	-1.23996	91.1047	-0.0981615
10.5627	120.118	11.5075	-1.23913	91.0995	-0.0980961
10.571	120.199	11.5068	-1.23825	91.0943	-0.0980266
10.5793	120.283	11.5062	-1.23737	91.089	-0.0979566
10.5877	120.366	11.5055	-1.23651	91.084	-0.097889
10.596	120.45	11.5049	-1.23565	91.079	-0.0978207
10.6043	120.536	11.5043	-1.23478	91.0739	-0.0977519
10.6127	120.622	11.5036	-1.23392	91.069	-0.0976839
10.621	120.707	11.503	-1.23311	91.0641	-0.0976193
10.6293	120.788	11.5024	-1.23226	91.0593	-0.0975522
10.6377	120.872	11.5017	-1.23141	91.054	-0.0974852
10.646	120.957	11.5011	-1.23054	91.0487	-0.0974159
10.6543	121.043	11.5004	-1.22971	91.0432	-0.0973503
10.6627	121.126	11.4997	-1.22891	91.0378	-0.0972869
10.671	121.211	11.499	-1.22808	91.0324	-0.0972211
10.6793	121.294	11.4983	-1.22727	91.027	-0.0971574
10.6877	121.376	11.4977	-1.22646	91.0216	-0.0970934
10.696	121.46	11.497	-1.22566	91.0161	-0.0970299
10.7043	121.544	11.4963	-1.22487	91.0105	-0.0969677
10.7127	121.624	11.4956	-1.22408	91.005	-0.0969045
10.721	121.711	11.4949	-1.22326	91.0001	-0.0968398
10.7293	121.797	11.4943	-1.22244	90.9949	-0.0967749
10.7377	121.882	11.4937	-1.22162	90.9899	-0.0967101
10.746	121.965	11.493	-1.22079	90.9849	-0.0966442
10.7543	122.046	11.4924	-1.21998	90.9799	-0.09658
10.7627	122.135	11.4918	-1.21914	90.9749	-0.096514
10.771	122.216	11.4911	-1.21832	90.9697	-0.0964487
10.7793	122.304	11.4905	-1.21751	90.9646	-0.0963845
10.7877	122.388	11.4898	-1.21668	90.9597	-0.0963187
10.796	122.472	11.4892	-1.21588	90.9546	-0.0962552
10.8043	122.555	11.4885	-1.21509	90.9491	-0.0961929
10.8127	122.642	11.4878	-1.21431	90.9437	-0.0961313
10.821	122.725	11.4872	-1.21355	90.9387	-0.0960709
10.8293	122.807	11.4865	-1.21277	90.9334	-0.0960098
10.8377	122.897	11.4858	-1.212	90.928	-0.0959486
10.846	122.976	11.4852	-1.21126	90.923	-0.09589
10.8543	123.062	11.4846	-1.21051	90.9178	-0.0958304
10.8627	123.147	11.4839	-1.20972	90.9127	-0.0957679
10.871	123.232	11.4833	-1.20895	90.9076	-0.0957073
10.8793	123.314	11.4826	-1.20817	90.9026	-0.0956451
10.8877	123.398	11.482	-1.20738	90.8976	-0.095583
10.896	123.484	11.4814	-1.20664	90.8927	-0.0955239
10.9043	123.568	11.4807	-1.20586	90.8877	-0.0954622
10.9127	123.653	11.4801	-1.2051	90.8828	-0.0954022
10.921	123.735	11.4795	-1.20431	90.8779	-0.0953399
10.9293	123.823	11.4789	-1.2035	90.8728	-0.0952754
10.9377	123.904	11.4782	-1.20269	90.8677	-0.0952115
10.946	123.989	11.4776	-1.20192	90.8627	-0.0951505
10.9543	124.073	11.477	-1.20118	90.8577	-0.0950915
10.9627	124.153	11.4763	-1.20043	90.8528	-0.0950327
10.971	124.236	11.4757	-1.19968	90.8479	-0.0949727
10.9793	124.326	11.4751	-1.19889	90.8428	-0.0949105
10.9877	124.407	11.4744	-1.19813	90.8375	-0.0948502
10.996	124.495	11.4738	-1.19736	90.8323	-0.0947893
11.0043	124.574	11.4731	-1.19659	90.827	-0.0947284
11.0127	124.659	11.4724	-1.19585	90.8216	-0.0946703
11.021	124.743	11.4718	-1.19512	90.8167	-0.0946122
11.0293	124.83	11.4712	-1.19439	90.8118	-0.0945546
11.0377	124.91	11.4705	-1.19362	90.807	-0.0944931
11.046	124.995	11.4699	-1.19284	90.802	-0.0944319
11.0543	125.078	11.4693	-1.19207	90.7969	-0.0943703
11.0627	125.162	11.4687	-1.19131	90.7922	-0.0943109
11.071	125.248	11.4681	-1.19057	90.7874	-0.0942519
11.0793	125.337	11.4674	-1.18985	90.7824	-0.0941952
11.0877	125.417	11.4668	-1.18913	90.7776	-0.0941376
11.096	125.499	11.4662	-1.18836	90.7729	-0.0940767
11.1043	125.586	11.4656	-1.18759	90.7681	-0.0940163
11.1127	125.669	11.465	-1.18681	90.7631	-0.0939539
11.121	125.752	11.4644	-1.18601	90.7581	-0.0938912
11.1293	125.839	11.4637	-1.18527	90.753	-0.0938323
11.1377	125.921	11.4631	-1.18453	90.7479	-0.093774
11.146	126.007	11.4624	-1.18379	90.7425	-0.0937152
11.1543	126.09	11.4617	-1.18308	90.7372	-0.0936586
11.1627	126.181	11.4611	-1.18229	90.7323	-0.0935966
11.171	126.261	11.4605	-1.18155	90.7274	-0.093538
11.1793	126.341	11.4599	-1.18082	90.7227	-0.0934803
11.1877	126.421	11.4593	-1.1801	90.7178	-0.0934227
11.196	126.506	11.4587	-1.17937	90.7128	-0.0933655
11.2043	126.593	11.458	-1.17869	90.7077	-0.0933112
11.2127	126.68	11.4574	-1.17796	90.7028	-0.0932535
11.221	126.765	11.4568	-1.17723	90.6981	-0.0931961
11.2293	126.849	11.4562	-1.17652	90.6932	-0.0931395
11.2377	126.933	11.4556	-1.17574	90.6884	-0.0930776
11.246	127.019	11.455	-1.175	90.6836	-0.0930194
11.2543	127.102	11.4543	-1.17427	90.6786	-0.0929616
11.2627	127.186	11.4537	-1.17358	90.6737	-0.0929069
11.271	127.267	11.4531	-1.17289	90.6691	-0.0928522
11.2793	127.353	11.4525	-1.17219	90.6643	-0.0927971
11.2877	127.438	11.4519	-1.17145	90.6594	-0.0927384
11.296	127.52	11.4513	-1.17074	90.6545	-0.0926824
11.3043	127.606	11.4507	-1.17004	90.6496	-0.0926266
11.3127	127.691	11.4501	-1.16932	90.6449	-0.0925699
11.321	127.776	11.4495	-1.16863	90.6403	-0.0925147
11.3293	127.857	11.4489	-1.16793	90.6359	-0.0924596
11.3377	127.941	11.4484	-1.16725	90.6313	-0.0924054
11.346	128.027	11.4477	-1.16651	90.6263	-0.0923473
11.3543	128.113	11.4471	-1.16579	90.6211	-0.0922904
11.3627	128.196	11.4464	-1.16509	90.6161	-0.0922347
11.371	128.278	11.4458	-1.16442	90.6113	-0.0921818
11.3793	128.365	11.4452	-1.1637	90.6066	-0.0921247
11.3877	128.45	11.4447	-1.16299	90.6021	-0.0920686
11.396	128.532	11.4441	-1.16229	90.5974	-0.092013
11.4043	128.616	11.4435	-1.1616	90.5929	-0.0919585
11.4127	128.7	11.4429	-1.16092	90.588	-0.0919047
11.421	128.785	11.4423	-1.16021	90.5831	-0.0918484
11.4293	128.869	11.4417	-1.15952	90.5785	-0.0917935
11.4377	128.955	11.4411	-1.1588	90.5735	-0.0917368
11.446	129.037	11.4405	-1.15809	90.5689	-0.0916808
11.4543	129.123	11.4399	-1.15735	90.5641	-0.0916217
11.4627	129.209	11.4393	-1.15667	90.5593	-0.0915679
11.471	129.292	11.4387	-1.15599	90.5546	-0.0915146
11.4793	129.374	11.4381	-1.1553	90.5501	-0.0914596
11.4877	129.458	11.4375	-1.1546	90.5454	-0.0914041
11.496	129.541	11.4369	-1.15391	90.5406	-0.0913494
11.5043	129.624	11.4363	-1.15321	90.5357	-0.0912943
11.5127	129.713	11.4357	-1.15251	90.5308	-0.091239
11.521	129.795	11.4351	-1.15184	90.5262	-0.091186
11.5293	129.876	11.4345	-1.15116	90.5218	-0.091132
11.5377	129.96	11.434	-1.15053	90.5173	-0.0910822
11.546	130.044	11.4334	-1.14985	90.5127	-0.0910283
11.5543	130.126	11.4328	-1.14917	90.5082	-0.0909743
11.5627	130.215	11.4322	-1.1485	90.5034	-0.0909211
11.571	130.299	11.4316	-1.14781	90.4984	-0.0908671
11.5793	130.383	11.431	-1.14715	90.4938	-0.0908148
11.5877	130.465	11.4304	-1.14651	90.4893	-0.0907637
11.596	130.549	11.4299	-1.14585	90.4849	-0.0907113
11.6043	130.633	11.4293	-1.14517	90.4802	-0.0906579
11.6127	130.718	11.4286	-1.14449	90.4753	-0.090604
11.621	130.803	11.428	-1.14377	90.4704	-0.0905473
11.6293	130.888	11.4274	-1.14308	90.4655	-0.0904926
11.6377	130.973	11.4268	-1.14236	90.4606	-0.0904355
11.646	131.058	11.4262	-1.14166	90.4559	-0.0903796
11.6543	131.142	11.4256	-1.14097	90.4514	-0.0903256
11.6627	131.224	11.425	-1.14025	90.4464	-0.0902683
11.671	131.306	11.4244	-1.13954	90.4416	-0.0902118
11.6793	131.391	11.4238	-1.1389	90.4369	-0.0901612
11.6877	131.477	11.4232	-1.13821	90.4325	-0.0901069
11.696	131.56	11.4227	-1.13754	90.4281	-0.0900536
11.7043	131.644	11.4221	-1.13687	90.4237	-0.0900008
11.7127	131.732	11.4216	-1.1362	90.4193	-0.0899473
11.721	131.812	11.421	-1.13553	90.4149	-0.0898949
11.7293	131.898	11.4204	-1.13486	90.4102	-0.0898418
11.7377	131.986	11.4198	-1.13419	90.4054	-0.0897885
11.746	132.067	11.4193	-1.13352	90.4011	-0.0897357
11.7543	132.148	11.4187	-1.13284	90.3968	-0.089682
11.7627	132.233	11.4182	-1.13213	90.3924	-0.0896259
11.771	132.315	11.4176	-1.13148	90.388	-0.089574
11.7793	132.4	11.417	-1.1308	90.3834	-0.0895205
11.7877	132.483	11.4165	-1.13015	90.3788	-0.0894686
11.796	132.568	11.4159	-1.1295	90.374	-0.0894176
11.8043	132.65	11.4152	-1.12885	90.3691	-0.0893658
11.8127	132.734	11.4147	-1.12818	90.3647	-0.089313
11.821	132.823	11.4142	-1.12753	90.3606	-0.0892616
11.8293	132.906	11.4136	-1.12689	90.3561	-0.0892106
11.8377	132.99	11.413	-1.12622	90.3516	-0.0891578
11.846	133.073	11.4124	-1.12555	90.3469	-0.0891049
11.8543	133.156	11.4118	-1.12488	90.3422	-0.0890512
11.8627	133.239	11.4113	-1.12425	90.3378	-0.0890016
11.871	133.324	11.4107	-1.12361	90.3334	-0.0889511
11.8793	133.407	11.4102	-1.12292	90.3291	-0.0888962
11.8877	133.489	11.4096	-1.12226	90.3246	-0.0888443
11.896	133.575	11.4091	-1.1216	90.3203	-0.0887918
11.9043	133.658	11.4085	-1.12094	90.3157	-0.0887393
11.9127	133.742	11.4079	-1.12028	90.3112	-0.0886872
11.921	133.828	11.4074	-1.11963	90.3068	-0.0886356
11.9293	133.909	11.4068	-1.11895	90.3022	-0.0885821
11.9377	134	11.4062	-1.1183	90.2977	-0.0885303
11.946	134.085	11.4056	-1.11761	90.2932	-0.0884761
11.9543	134.166	11.4051	-1.11691	90.2886	-0.0884206
11.9627	134.252	11.4045	-1.11624	90.284	-0.0883674
11.971	134.333	11.4039	-1.11555	90.2794	-0.0883127
11.9793	134.415	11.4033	-1.11491	90.2746	-0.0882618
11.9877	134.499	11.4027	-1.11423	90.2702	-0.0882087
11.996	134.585	11.4022	-1.11354	90.2659	-0.0881536
12.0043	134.672	11.4016	-1.11288	90.2613	-0.0881016
12.0127	134.756	11.4011	-1.11223	90.2569	-0.0880497
12.021	134.838	11.4005	-1.11152	90.2525	-0.0879939
12.0293	134.921	11.3999	-1.11083	90.2479	-0.0879394
12.0377	135.006	11.3994	-1.11015	90.2436	-0.0878856
12.046	135.091	11.3988	-1.10948	90.2393	-0.0878327
12.0543	135.172	11.3983	-1.10883	90.235	-0.0877807
12.0627	135.258	11.3978	-1.10814	90.2311	-0.0877266
12.071	135.344	11.3973	-1.10749	90.2268	-0.0876749
12.0793	135.425	11.3967	-1.10686	90.2222	-0.0876249
12.0877	135.51	11.3961	-1.10618	90.2177	-0.0875714
12.096	135.595	11.3956	-1.1055	90.2135	-0.0875174
12.1043	135.681	11.395	-1.10486	90.2093	-0.0874664
12.1127	135.762	11.3945	-1.10418	90.2051	-0.0874129
12.121	135.847	11.3939	-1.10351	90.2005	-0.0873597
12.1293	135.934	11.3934	-1.10283	90.1962	-0.0873062
12.1377	136.017	11.3928	-1.10216	90.1917	-0.0872528
12.146	136.104	11.3922	-1.10151	90.187	-0.0872014
12.1543	136.192	11.3917	-1.10083	90.1827	-0.0871475
12.1627	136.273	11.3912	-1.10015	90.1785	-0.0870936
12.171	136.355	11.3907	-1.09947	90.1746	-0.0870402
12.1793	136.435	11.3901	-1.09883	90.1703	-0.0869895
12.1877	136.518	11.3896	-1.09814	90.1658	-0.0869347
12.196	136.607	11.389	-1.09745	90.1613	-0.0868796
12.2043	136.689	11.3885	-1.09678	90.1571	-0.0868271
12.2127	136.771	11.3879	-1.09615	90.1529	-0.0867768
12.221	136.858	11.3874	-1.09549	90.1489	-0.0867246
12.2293	136.941	11.3869	-1.0948	90.1446	-0.0866702
12.2377	137.028	11.3863	-1.09414	90.1403	-0.0866181
12.246	137.111	11.3858	-1.09345	90.1359	-0.0865637
12.2543	137.191	11.3852	-1.09279	90.1316	-0.0865111
12.2627	137.272	11.3847	-1.0921	90.1274	-0.0864566
12.271	137.358	11.3841	-1.09143	90.123	-0.0864037
12.2793	137.444	11.3837	-1.09079	90.1192	-0.0863529
12.2877	137.526	11.3831	-1.09013	90.115	-0.0863002
12.296	137.614	11.3826	-1.08945	90.1109	-0.0862466
12.3043	137.699	11.3821	-1.08881	90.1067	-0.0861957
12.3127	137.78	11.3816	-1.08813	90.1025	-0.0861423
12.321	137.867	11.381	-1.08742	90.0982	-0.0860859
12.3293	137.947	11.3805	-1.08674	90.0939	-0.0860322
12.3377	138.031	11.3799	-1.08607	90.0895	-0.0859789
12.346	138.116	11.3794	-1.08541	90.0853	-0.0859268
12.3543	138.204	11.3789	-1.08475	90.0814	-0.0858747
12.3627	138.288	11.3783	-1.08409	90.077	-0.0858223
12.371	138.368	11.3778	-1.08344	90.0729	-0.085771
12.3793	138.453	11.3773	-1.08277	90.0688	-0.0857177
12.3877	138.537	11.3768	-1.08205	90.0647	-0.0856613
12.396	138.618	11.3763	-1.08141	90.0606	-0.0856105
12.4043	138.703	11.3757	-1.08077	90.0564	-0.0855598
12.4127	138.789	11.3752	-1.08011	90.0525	-0.0855076
12.421	138.871	11.3747	-1.07944	90.0484	-0.0854542
12.4293	138.955	11.3742	-1.07876	90.0442	-0.0854005
12.4377	139.038	11.3736	-1.07806	90.0399	-0.0853452
12.446	139.125	11.3731	-1.07735	90.0358	-0.0852889
12.4543	139.208	11.3726	-1.07665	90.0317	-0.0852334
12.4627	139.292	11.3721	-1.07596	90.0274	-0.0851786
12.471	139.38	11.3715	-1.0753	90.0232	-0.0851267
12.4793	139.463	11.371	-1.07462	90.0191	-0.0850725
12.4877	139.543	11.3705	-1.07396	90.015	-0.0850206
12.496	139.632	11.37	-1.07331	90.011	-0.0849692
12.5043	139.711	11.3695	-1.07266	90.0069	-0.0849172
12.5127	139.796	11.3689	-1.07199	90.0027	-0.0848644
12.521	139.878	11.3684	-1.07137	89.9985	-0.0848155
12.5293	139.966	11.3679	-1.07077	89.9944	-0.084768
12.5377	140.048	11.3674	-1.07013	89.9903	-0.0847172
12.546	140.133	11.3669	-1.0695	89.9864	-0.0846672
12.5543	140.215	11.3664	-1.06885	89.9823	-0.0846162
12.5627	140.303	11.3658	-1.06822	89.978	-0.0845658
12.571	140.385	11.3653	-1.06758	89.9737	-0.0845153
12.5793	140.469	11.3648	-1.06695	89.9694	-0.0844652
12.5877	140.554	11.3642	-1.06631	89.9652	-0.0844152
12.596	140.641	11.3637	-1.06569	89.9614	-0.0843655
12.6043	140.72	11.3632	-1.06504	89.9575	-0.0843143
12.6127	140.806	11.3627	-1.06437	89.9534	-0.0842614
12.621	140.895	11.3622	-1.06372	89.9494	-0.0842098
12.6293	140.976	11.3617	-1.06305	89.9452	-0.0841569
12.6377	141.057	11.3612	-1.06238	89.9411	-0.0841033
12.646	141.142	11.3607	-1.06169	89.9371	-0.0840491
12.6543	141.225	11.3602	-1.06101	89.933	-0.083995
12.6627	141.312	11.3597	-1.06037	89.9291	-0.0839442
12.671	141.392	11.3592	-1.05973	89.9253	-0.0838936
12.6793	141.476	11.3587	-1.05907	89.9211	-0.0838418
12.6877	141.563	11.3581	-1.0584	89.9171	-0.0837885
12.696	141.647	11.3576	-1.05776	89.9131	-0.0837379
12.7043	141.732	11.3571	-1.05713	89.9089	-0.0836884
12.7127	141.811	11.3566	-1.05654	89.9048	-0.0836413
12.721	141.899	11.3561	-1.05593	89.9006	-0.0835931
12.7293	141.982	11.3556	-1.05529	89.8968	-0.0835425
12.7377	142.063	11.3551	-1.05468	89.893	-0.0834937
12.746	142.149	11.3546	-1.05402	89.8888	-0.0834419
12.7543	142.236	11.354	-1.05336	89.8846	-0.0833895
12.7627	142.317	11.3535	-1.05269	89.8805	-0.0833362
12.771	142.403	11.353	-1.05204	89.8765	-0.0832853
12.7793	142.482	11.3525	-1.05141	89.8724	-0.0832352
12.7877	142.569	11.352	-1.05075	89.8683	-0.0831831
12.796	142.654	11.3515	-1.0501	89.8645	-0.0831318
12.8043	142.737	11.351	-1.04947	89.8609	-0.0830814
12.8127	142.819	11.3506	-1.04884	89.8571	-0.0830318
12.821	142.906	11.35	-1.04819	89.8531	-0.0829802
12.8293	142.99	11.3496	-1.04754	89.8493	-0.0829292
12.8377	143.075	11.3491	-1.04693	89.8459	-0.0828803
12.846	143.159	11.3487	-1.04634	89.8423	-0.0828338
12.8543	143.243	11.3482	-1.04573	89.8386	-0.0827854
12.8627	143.325	11.3478	-1.04512	89.8349	-0.082737
12.871	143.412	11.3473	-1.04448	89.8311	-0.0826866
12.8793	143.496	11.3468	-1.04385	89.8273	-0.0826366
12.8877	143.582	11.3463	-1.04324	89.8233	-0.0825888
12.896	143.662	11.3458	-1.04265	89.8195	-0.0825416
12.9043	143.748	11.3453	-1.04202	89.8158	-0.0824918
12.9127	143.832	11.3448	-1.04139	89.8115	-0.0824422
12.921	143.916	11.3443	-1.04075	89.8074	-0.082391
12.9293	143.998	11.3438	-1.04012	89.8032	-0.0823415
12.9377	144.085	11.3432	-1.03951	89.7992	-0.0822932
12.946	144.166	11.3428	-1.03887	89.7955	-0.0822424
12.9543	144.253	11.3423	-1.03823	89.7918	-0.0821922
12.9627	144.335	11.3418	-1.03758	89.7881	-0.0821406
12.971	144.418	11.3414	-1.03692	89.7843	-0.0820878
12.9793	144.504	11.3409	-1.03624	89.7805	-0.0820342
12.9877	144.588	11.3404	-1.03561	89.7768	-0.081984
12.996	144.672	11.34	-1.03498	89.7733	-0.0819347
13.0043	144.755	11.3395	-1.03437	89.7694	-0.081886
13.0127	144.837	11.339	-1.03374	89.7654	-0.0818361
13.021	144.922	11.3385	-1.03309	89.7616	-0.081785
13.0293	145.004	11.338	-1.03246	89.7577	-0.0817353
13.0377	145.09	11.3375	-1.03187	89.7539	-0.0816879
13.046	145.174	11.337	-1.03126	89.7501	-0.08164
13.0543	145.26	11.3366	-1.03066	89.7462	-0.0815922
13.0627	145.345	11.336	-1.03008	89.742	-0.0815466
13.071	145.425	11.3355	-1.0295	89.7381	-0.0815005
13.0793	145.512	11.3351	-1.02887	89.7343	-0.081451
13.0877	145.596	11.3346	-1.02828	89.7308	-0.081404
13.096	145.681	11.3342	-1.02767	89.7273	-0.0813556
13.1043	145.764	11.3337	-1.02706	89.7238	-0.0813074
13.1127	145.845	11.3332	-1.02644	89.72	-0.0812584
13.121	145.931	11.3328	-1.02585	89.7161	-0.0812116
13.1293	146.014	11.3323	-1.02528	89.7124	-0.0811666
13.1377	146.098	11.3318	-1.02469	89.7089	-0.0811198
13.146	146.183	11.3314	-1.02406	89.7055	-0.08107
13.1543	146.265	11.331	-1.02342	89.7019	-0.0810196
13.1627	146.349	11.3305	-1.02283	89.6981	-0.0809729
13.171	146.433	11.33	-1.02222	89.6943	-0.0809243
13.1793	146.517	11.3295	-1.02162	89.6905	-0.0808766
13.1877	146.603	11.329	-1.02101	89.6864	-0.0808284
13.196	146.689	11.3285	-1.02044	89.6827	-0.0807832
13.2043	146.769	11.3281	-1.01983	89.679	-0.0807354
13.2127	146.852	11.3276	-1.0192	89.6752	-0.0806853
13.221	146.938	11.3271	-1.0186	89.6715	-0.0806381
13.2293	147.019	11.3266	-1.01803	89.6677	-0.080593
13.2377	147.107	11.3262	-1.01745	89.664	-0.0805469
13.246	147.189	11.3257	-1.01685	89.6605	-0.0804994
13.2543	147.273	11.3253	-1.01626	89.6569	-0.0804527
13.2627	147.358	11.3248	-1.01568	89.6533	-0.0804063
13.271	147.441	11.3244	-1.0151	89.6496	-0.080361
13.2793	147.527	11.3239	-1.01453	89.6459	-0.0803159
13.2877	147.61	11.3234	-1.01395	89.6424	-0.0802699
13.296	147.695	11.323	-1.01337	89.6388	-0.0802237
13.3043	147.777	11.3225	-1.01277	89.635	-0.0801761
13.3127	147.858	11.322	-1.0122	89.6313	-0.0801308
13.321	147.947	11.3215	-1.01163	89.6274	-0.0800864
13.3293	148.032	11.3211	-1.01107	89.6236	-0.080042
13.3377	148.112	11.3206	-1.01052	89.6195	-0.0799978
13.346	148.196	11.3201	-1.00993	89.6156	-0.0799518
13.3543	148.279	11.3196	-1.00934	89.612	-0.0799049
13.3627	148.364	11.3191	-1.00874	89.6082	-0.0798574
13.371	148.449	11.3186	-1.00819	89.6042	-0.0798138
13.3793	148.533	11.3182	-1.00765	89.6006	-0.0797706
13.3877	148.62	11.3177	-1.00709	89.597	-0.0797268
13.396	148.701	11.3172	-1.00651	89.5932	-0.079681
13.4043	148.784	11.3168	-1.00594	89.5896	-0.0796353
13.4127	148.869	11.3163	-1.00537	89.5859	-0.0795905
13.421	148.954	11.3158	-1.0048	89.5822	-0.0795451
13.4293	149.037	11.3154	-1.00423	89.5787	-0.0794999
13.4377	149.122	11.3149	-1.00368	89.575	-0.0794568
13.446	149.209	11.3145	-1.00311	89.5715	-0.0794118
13.4543	149.287	11.314	-1.00251	89.568	-0.0793642
13.4627	149.374	11.3136	-1.00195	89.5644	-0.0793198
13.471	149.457	11.3131	-1.00139	89.5609	-0.0792751
13.4793	149.54	11.3127	-1.00081	89.5574	-0.0792298
13.4877	149.624	11.3123	-1.00025	89.5538	-0.0791851
13.496	149.71	11.3118	-0.999686	89.5503	-0.0791405
13.5043	149.796	11.3114	-0.999107	89.5471	-0.0790946
13.5127	149.879	11.3109	-0.998521	89.5432	-0.0790482
13.521	149.964	11.3104	-0.997953	89.5395	-0.0790033
13.5293	150.048	11.31	-0.997416	89.5356	-0.0789608
13.5377	150.131	11.3095	-0.996852	89.5316	-0.0789161
13.546	150.214	11.309	-0.996283	89.5279	-0.0788711
13.5543	150.3	11.3085	-0.995735	89.5244	-0.0788277
13.5627	150.381	11.3081	-0.995196	89.521	-0.078785
13.571	150.467	11.3077	-0.994648	89.5174	-0.0787416
13.5793	150.548	11.3072	-0.994067	89.5139	-0.0786957
13.5877	150.635	11.3067	-0.993486	89.5101	-0.0786497
13.596	150.721	11.3063	-0.992936	89.5067	-0.0786061
13.6043	150.803	11.3059	-0.992395	89.5032	-0.0785633
13.6127	150.886	11.3055	-0.99184	89.5001	-0.0785194
13.621	150.969	11.305	-0.991292	89.4968	-0.078476
13.6293	151.053	11.3046	-0.990722	89.4934	-0.0784308
13.6377	151.138	11.3042	-0.99014	89.4898	-0.0783848
13.646	151.22	11.3037	-0.989572	89.4861	-0.0783398
13.6543	151.307	11.3033	-0.989019	89.4826	-0.078296
13.6627	151.388	11.3028	-0.988485	89.4792	-0.0782538
13.671	151.472	11.3024	-0.987945	89.4758	-0.078211
13.6793	151.562	11.302	-0.987414	89.4724	-0.0781689
13.6877	151.643	11.3015	-0.986827	89.469	-0.0781225
13.696	151.726	11.3011	-0.986228	89.4655	-0.0780751
13.7043	151.814	11.3006	-0.985639	89.462	-0.0780284
13.7127	151.894	11.3002	-0.985044	89.4585	-0.0779814
13.721	151.973	11.2998	-0.984448	89.455	-0.0779342
13.7293	152.063	11.2993	-0.983861	89.4515	-0.0778877
13.7377	152.146	11.2989	-0.98326	89.4482	-0.0778401
13.746	152.228	11.2985	-0.982675	89.4446	-0.0777938
13.7543	152.316	11.298	-0.982101	89.4412	-0.0777484
13.7627	152.395	11.2976	-0.981506	89.4376	-0.0777013
13.771	152.482	11.2971	-0.980957	89.434	-0.0776578
13.7793	152.564	11.2967	-0.980422	89.4306	-0.0776154
13.7877	152.646	11.2963	-0.979863	89.4272	-0.0775712
13.796	152.732	11.2958	-0.979308	89.4238	-0.0775272
13.8043	152.818	11.2954	-0.978735	89.4203	-0.0774819
13.8127	152.903	11.295	-0.978162	89.4169	-0.0774365
13.821	152.984	11.2945	-0.977599	89.4133	-0.0773919
13.8293	153.071	11.2941	-0.977029	89.4098	-0.0773469
13.8377	153.153	11.2937	-0.976459	89.4066	-0.0773017
13.846	153.238	11.2932	-0.975873	89.4033	-0.0772553
13.8543	153.321	11.2928	-0.975287	89.4001	-0.077209
13.8627	153.409	11.2924	-0.974691	89.3964	-0.0771617
13.871	153.491	11.2919	-0.97411	89.393	-0.0771158
13.8793	153.573	11.2915	-0.973534	89.3895	-0.0770702
13.8877	153.656	11.2911	-0.972975	89.3862	-0.0770259
13.896	153.739	11.2907	-0.972413	89.3829	-0.0769814
13.9043	153.825	11.2902	-0.971819	89.3796	-0.0769344
13.9127	153.913	11.2898	-0.971216	89.3761	-0.0768866
13.921	153.994	11.2894	-0.970641	89.3725	-0.0768411
13.9293	154.072	11.2889	-0.97005	89.3694	-0.0767944
13.9377	154.158	11.2885	-0.96946	89.3661	-0.0767477
13.946	154.245	11.2882	-0.968877	89.3631	-0.0767014
13.9543	154.329	11.2877	-0.96826	89.3596	-0.0766526
13.9627	154.411	11.2873	-0.967643	89.3561	-0.0766038
13.971	154.496	11.2868	-0.967041	89.3527	-0.0765561
13.9793	154.581	11.2864	-0.966418	89.3493	-0.0765068
13.9877	154.667	11.286	-0.9658	89.3459	-0.0764579
13.996	154.75	11.2856	-0.965216	89.3427	-0.0764116
14.0043	154.83	11.2852	-0.964628	89.3395	-0.0763651
14.0127	154.92	11.2847	-0.964049	89.336	-0.0763193
14.021	155.001	11.2843	-0.963441	89.3325	-0.0762711
14.0293	155.088	11.2839	-0.962831	89.3291	-0.0762228
14.0377	155.167	11.2835	-0.962285	89.3259	-0.0761796
14.046	155.253	11.283	-0.961734	89.3227	-0.076136
14.0543	155.338	11.2826	-0.961162	89.3192	-0.0760907
14.0627	155.423	11.2822	-0.960584	89.316	-0.076045
14.071	155.506	11.2818	-0.960024	89.313	-0.0760006
14.0793	155.595	11.2814	-0.959408	89.3097	-0.0759518
14.0877	155.675	11.281	-0.958785	89.3064	-0.0759025
14.096	155.76	11.2806	-0.958196	89.3031	-0.0758559
14.1043	155.84	11.2802	-0.957594	89.2998	-0.0758082
14.1127	155.93	11.2797	-0.957002	89.2965	-0.0757614
14.121	156.012	11.2793	-0.956393	89.2933	-0.0757132
14.1293	156.097	11.2789	-0.955777	89.2901	-0.0756644
14.1377	156.179	11.2785	-0.955188	89.2869	-0.0756178
14.146	156.266	11.2781	-0.954585	89.2835	-0.0755701
14.1543	156.347	11.2777	-0.95395	89.2801	-0.0755198
14.1627	156.429	11.2773	-0.953367	89.2769	-0.0754736
14.171	156.519	11.2769	-0.952785	89.2737	-0.0754276
14.1793	156.603	11.2764	-0.952198	89.2702	-0.0753811
14.1877	156.685	11.276	-0.951608	89.267	-0.0753344
14.196	156.769	11.2756	-0.95101	89.2638	-0.0752871
14.2043	156.856	11.2752	-0.950412	89.2607	-0.0752397
14.2127	156.938	11.2748	-0.949832	89.2575	-0.0751938
14.221	157.021	11.2744	-0.949239	89.2546	-0.0751468
14.2293	157.105	11.2741	-0.948654	89.2516	-0.0751005
14.2377	157.191	11.2737	-0.948102	89.2486	-0.0750568
14.246	157.278	11.2733	-0.947483	89.2455	-0.0750078
14.2543	157.36	11.2729	-0.946854	89.2422	-0.074958
14.2627	157.445	11.2725	-0.946236	89.2391	-0.0749091
14.271	157.529	11.2721	-0.945635	89.236	-0.0748615
14.2793	157.612	11.2717	-0.945029	89.2328	-0.0748135
14.2877	157.698	11.2713	-0.94443	89.2296	-0.0747661
14.296	157.78	11.2709	-0.94381	89.2265	-0.0747171
14.3043	157.858	11.2705	-0.943174	89.2231	-0.0746667
14.3127	157.946	11.2701	-0.9426	89.2201	-0.0746212
14.321	158.031	11.2697	-0.941986	89.217	-0.0745726
14.3293	158.112	11.2693	-0.941423	89.2138	-0.0745281
14.3377	158.196	11.2689	-0.940849	89.2107	-0.0744827
14.346	158.283	11.2685	-0.940264	89.2077	-0.0744364
14.3543	158.366	11.2682	-0.939689	89.2049	-0.0743908
14.3627	158.45	11.2678	-0.939131	89.2018	-0.0743466
14.371	158.536	11.2674	-0.938557	89.1985	-0.0743012
14.3793	158.617	11.267	-0.937978	89.1953	-0.0742554
14.3877	158.702	11.2666	-0.937404	89.1923	-0.0742099
14.396	158.782	11.2662	-0.936796	89.1893	-0.0741618
14.4043	158.866	11.2658	-0.936211	89.1861	-0.0741154
14.4127	158.951	11.2654	-0.93561	89.1833	-0.0740679
14.421	159.038	11.2651	-0.935032	89.1806	-0.0740221
14.4293	159.121	11.2647	-0.934455	89.1774	-0.0739764
14.4377	159.203	11.2643	-0.933841	89.1742	-0.0739278
14.446	159.288	11.2639	-0.933212	89.1711	-0.0738781
14.4543	159.372	11.2635	-0.932603	89.1682	-0.0738298
14.4627	159.457	11.2632	-0.931997	89.1652	-0.0737819
14.471	159.538	11.2627	-0.931415	89.1619	-0.0737358
14.4793	159.622	11.2624	-0.930822	89.1589	-0.0736888
14.4877	159.708	11.262	-0.930247	89.1559	-0.0736433
14.496	159.793	11.2616	-0.929667	89.1527	-0.0735974
14.5043	159.875	11.2612	-0.929101	89.1497	-0.0735526
14.5127	159.959	11.2608	-0.928533	89.1468	-0.0735077
14.521	160.04	11.2605	-0.927974	89.1439	-0.0734634
14.5293	160.127	11.2601	-0.927395	89.1407	-0.0734176
14.5377	160.209	11.2597	-0.926808	89.1377	-0.0733711
14.546	160.298	11.2593	-0.926248	89.1346	-0.0733267
14.5543	160.375	11.2589	-0.92568	89.1315	-0.0732818
14.5627	160.461	11.2585	-0.92509	89.1284	-0.073235
14.571	160.541	11.2581	-0.924494	89.1251	-0.0731879
14.5793	160.631	11.2577	-0.923911	89.1222	-0.0731417
14.5877	160.714	11.2573	-0.923323	89.119	-0.0730952
14.596	160.799	11.2569	-0.922706	89.1157	-0.0730463
14.6043	160.882	11.2565	-0.922148	89.1124	-0.0730021
14.6127	160.967	11.2561	-0.921623	89.1095	-0.0729606
14.621	161.052	11.2558	-0.921081	89.1065	-0.0729177
14.6293	161.132	11.2554	-0.920512	89.1037	-0.0728726
14.6377	161.219	11.255	-0.919936	89.1006	-0.072827
14.646	161.303	11.2546	-0.91939	89.0977	-0.0727838
14.6543	161.388	11.2543	-0.918844	89.0948	-0.0727406
14.6627	161.471	11.2539	-0.918292	89.0917	-0.0726969
14.671	161.552	11.2535	-0.917716	89.0889	-0.0726513
14.6793	161.636	11.2532	-0.9172	89.0862	-0.0726105
14.6877	161.724	11.2528	-0.916629	89.0835	-0.0725653
14.696	161.806	11.2525	-0.916041	89.0805	-0.0725187
14.7043	161.889	11.2521	-0.915475	89.0777	-0.0724739
14.7127	161.973	11.2518	-0.91494	89.0749	-0.0724315
14.721	162.057	11.2514	-0.914363	89.0723	-0.0723859
14.7293	162.142	11.251	-0.913808	89.0693	-0.0723419
14.7377	162.228	11.2507	-0.913242	89.0666	-0.0722971
14.746	162.313	11.2503	-0.912674	89.0636	-0.0722522
14.7543	162.394	11.25	-0.912122	89.0606	-0.0722085
14.7627	162.477	11.2496	-0.911545	89.0578	-0.0721628
14.771	162.56	11.2492	-0.910975	89.0548	-0.0721177
14.7793	162.644	11.2488	-0.91042	89.0517	-0.0720737
14.7877	162.728	11.2485	-0.909876	89.0488	-0.0720306
14.796	162.813	11.2481	-0.909294	89.0458	-0.0719846
14.8043	162.895	11.2477	-0.908748	89.043	-0.0719414
14.8127	162.983	11.2474	-0.908173	89.04	-0.0718958
14.821	163.066	11.247	-0.907609	89.0369	-0.0718512
14.8293	163.148	11.2466	-0.907077	89.0341	-0.0718091
14.8377	163.233	11.2463	-0.906516	89.0314	-0.0717646
14.846	163.317	11.2459	-0.905963	89.0287	-0.0717209
14.8543	163.4	11.2456	-0.905408	89.0261	-0.071677
14.8627	163.484	11.2453	-0.904839	89.0236	-0.0716319
14.871	163.568	11.2449	-0.904276	89.0208	-0.0715873
14.8793	163.649	11.2446	-0.903738	89.0181	-0.0715447
14.8877	163.735	11.2442	-0.903196	89.0153	-0.0715018
14.896	163.817	11.2439	-0.902647	89.0125	-0.0714583
14.9043	163.907	11.2435	-0.902083	89.0098	-0.0714137
14.9127	163.984	11.2432	-0.901516	89.0071	-0.0713688
14.921	164.068	11.2428	-0.900986	89.0041	-0.0713268
14.9293	164.153	11.2424	-0.900422	89.0011	-0.0712822
14.9377	164.237	11.2421	-0.899866	88.9981	-0.0712382
14.946	164.321	11.2416	-0.899355	88.9949	-0.0711977
14.9543	164.405	11.2413	-0.898817	88.9918	-0.0711552
14.9627	164.489	11.2409	-0.898243	88.9888	-0.0711097
14.971	164.576	11.2405	-0.897706	88.986	-0.0710672
14.9793	164.66	11.2401	-0.897189	88.983	-0.0710263
14.9877	164.742	11.2398	-0.896726	88.98	-0.0709896
14.996	164.827	11.2394	-0.896219	88.9773	-0.0709495
15.0043	164.912	11.2391	-0.89567	88.9744	-0.070906
15.0127	164.995	11.2387	-0.89516	88.9717	-0.0708656
15.021	165.076	11.2384	-0.894641	88.9691	-0.0708246
15.0293	165.16	11.238	-0.894057	88.9663	-0.0707783
15.0377	165.243	11.2377	-0.893482	88.9636	-0.0707328
15.046	165.331	11.2374	-0.892941	88.961	-0.07069
15.0543	165.413	11.237	-0.892394	88.9583	-0.0706467
15.0627	165.499	11.2367	-0.891845	88.9558	-0.0706032
15.071	165.581	11.2364	-0.891252	88.9533	-0.0705563
15.0793	165.666	11.236	-0.890694	88.9503	-0.0705121
15.0877	165.745	11.2357	-0.890156	88.9478	-0.0704695
15.096	165.836	11.2353	-0.889623	88.945	-0.0704273
15.1043	165.916	11.235	-0.889115	88.9421	-0.0703871
15.1127	166.003	11.2346	-0.888637	88.9394	-0.0703492
15.121	166.088	11.2343	-0.888166	88.9366	-0.070312
15.1293	166.172	11.2339	-0.887663	88.9339	-0.0702722
15.1377	166.256	11.2336	-0.887142	88.9312	-0.0702309
15.146	166.336	11.2332	-0.88663	88.9283	-0.0701904
15.1543	166.423	11.2328	-0.886137	88.9252	-0.0701513
15.1627	166.502	11.2325	-0.885621	88.9222	-0.0701105
15.171	166.587	11.2321	-0.8851	88.9194	-0.0700692
15.1793	166.676	11.2317	-0.884567	88.9165	-0.0700271
15.1877	166.757	11.2314	-0.884033	88.9138	-0.0699848
15.196	166.838	11.2311	-0.883494	88.9113	-0.0699421
15.2043	166.924	11.2308	-0.882926	88.9086	-0.0698971
15.2127	167.005	11.2304	-0.882403	88.9059	-0.0698558
15.221	167.09	11.2301	-0.881902	88.9032	-0.0698161
15.2293	167.174	11.2297	-0.881374	88.9003	-0.0697743
15.2377	167.26	11.2294	-0.880841	88.8976	-0.069732
15.246	167.343	11.2291	-0.880309	88.8952	-0.06969
15.2543	167.43	11.2287	-0.879785	88.8925	-0.0696485
15.2627	167.51	11.2284	-0.879252	88.8899	-0.0696063
15.271	167.594	11.228	-0.878705	88.8871	-0.069563
15.2793	167.679	11.2277	-0.878172	88.8845	-0.0695208
15.2877	167.764	11.2274	-0.877665	88.8819	-0.0694807
15.296	167.846	11.227	-0.877188	88.8791	-0.0694429
15.3043	167.931	11.2267	-0.876676	88.8763	-0.0694024
15.3127	168.014	11.2263	-0.876167	88.8736	-0.0693621
15.321	168.098	11.226	-0.875649	88.871	-0.0693211
15.3293	168.185	11.2257	-0.875135	88.8683	-0.0692803
15.3377	168.267	11.2254	-0.874642	88.8659	-0.0692414
15.346	168.35	11.225	-0.874152	88.8633	-0.0692026
15.3543	168.433	11.2247	-0.873687	88.8608	-0.0691658
15.3627	168.516	11.2243	-0.873222	88.8578	-0.0691289
15.371	168.602	11.2239	-0.872752	88.8547	-0.0690917
15.3793	168.685	11.2236	-0.872246	88.852	-0.0690516
15.3877	168.768	11.2233	-0.871736	88.8496	-0.0690113
15.396	168.85	11.223	-0.871247	88.8473	-0.0689726
15.4043	168.937	11.2227	-0.870753	88.8447	-0.0689335
15.4127	169.02	11.2223	-0.870265	88.8419	-0.0688948
15.421	169.105	11.222	-0.869783	88.839	-0.0688566
15.4293	169.188	11.2216	-0.869283	88.8362	-0.0688171
15.4377	169.275	11.2212	-0.868756	88.8333	-0.0687753
15.446	169.36	11.2209	-0.868212	88.8308	-0.0687323
15.4543	169.443	11.2206	-0.867675	88.8284	-0.0686898
15.4627	169.524	11.2203	-0.867139	88.8258	-0.0686473
15.471	169.61	11.2199	-0.866633	88.823	-0.0686073
15.4793	169.693	11.2196	-0.866103	88.82	-0.0685654
15.4877	169.775	11.2192	-0.865582	88.8173	-0.0685241
15.496	169.861	11.2189	-0.865066	88.8149	-0.0684832
15.5043	169.943	11.2186	-0.864529	88.8125	-0.0684407
15.5127	170.027	11.2183	-0.86402	88.8101	-0.0684004
15.521	170.111	11.218	-0.86352	88.8078	-0.0683608
15.5293	170.196	11.2177	-0.863029	88.8053	-0.068322
15.5377	170.279	11.2174	-0.862529	88.8028	-0.0682824
15.546	170.361	11.2171	-0.862022	88.8002	-0.0682423
15.5543	170.447	11.2167	-0.86154	88.7975	-0.0682041
15.5627	170.534	11.2164	-0.861057	88.7951	-0.0681659
15.571	170.615	11.2161	-0.860573	88.7926	-0.0681276
15.5793	170.699	11.2158	-0.86009	88.7901	-0.0680893
15.5877	170.782	11.2154	-0.859586	88.7874	-0.0680494
15.596	170.866	11.2151	-0.859096	88.7848	-0.0680106
15.6043	170.948	11.2148	-0.858627	88.782	-0.0679735
15.6127	171.032	11.2144	-0.858168	88.7793	-0.0679372
15.621	171.117	11.2141	-0.857709	88.7766	-0.0679008
15.6293	171.2	11.2138	-0.857221	88.7741	-0.0678622
15.6377	171.284	11.2134	-0.856705	88.7717	-0.0678213
15.646	171.367	11.2131	-0.856216	88.7692	-0.0677827
15.6543	171.449	11.2128	-0.855735	88.7666	-0.0677446
15.6627	171.539	11.2125	-0.855243	88.764	-0.0677056
15.671	171.622	11.2121	-0.854763	88.7613	-0.0676676
15.6793	171.705	11.2118	-0.85427	88.7587	-0.0676286
15.6877	171.789	11.2115	-0.853735	88.7561	-0.0675862
15.696	171.872	11.2111	-0.853191	88.7535	-0.0675431
15.7043	171.956	11.2109	-0.852701	88.7512	-0.0675044
15.7127	172.038	11.2105	-0.852235	88.7485	-0.0674675
15.721	172.124	11.2102	-0.85175	88.7459	-0.0674291
15.7293	172.206	11.2099	-0.851261	88.7434	-0.0673903
15.7377	172.291	11.2096	-0.850762	88.7409	-0.0673509
15.746	172.375	11.2092	-0.850264	88.7383	-0.0673115
15.7543	172.463	11.2089	-0.849791	88.7359	-0.067274
15.7627	172.543	11.2086	-0.849318	88.7336	-0.0672366
15.771	172.627	11.2083	-0.848871	88.7311	-0.0672012
15.7793	172.712	11.208	-0.848424	88.7287	-0.0671657
15.7877	172.797	11.2077	-0.847934	88.7261	-0.067127
15.796	172.882	11.2074	-0.847459	88.7238	-0.0670894
15.8043	172.965	11.2071	-0.846992	88.7213	-0.0670524
15.8127	173.048	11.2068	-0.846547	88.7187	-0.0670172
15.821	173.129	11.2064	-0.846089	88.7161	-0.0669809
15.8293	173.216	11.2061	-0.845636	88.7135	-0.0669451
15.8377	173.3	11.2058	-0.845154	88.711	-0.0669069
15.846	173.382	11.2055	-0.84468	88.7085	-0.0668694
15.8543	173.466	11.2051	-0.844202	88.7056	-0.0668316
15.8627	173.549	11.2048	-0.843725	88.7032	-0.0667938
15.871	173.634	11.2045	-0.843252	88.7007	-0.0667563
15.8793	173.718	11.2042	-0.842764	88.6981	-0.0667177
15.8877	173.801	11.2038	-0.84227	88.6956	-0.0666786
15.896	173.884	11.2035	-0.841748	88.6932	-0.0666373
15.9043	173.971	11.2032	-0.84128	88.6908	-0.0666002
15.9127	174.053	11.2029	-0.840804	88.6884	-0.0665625
15.921	174.134	11.2026	-0.840333	88.6858	-0.0665252
15.9293	174.22	11.2023	-0.839866	88.6835	-0.0664883
15.9377	174.302	11.202	-0.839406	88.6811	-0.0664519
15.946	174.388	11.2017	-0.838916	88.6784	-0.0664131
15.9543	174.474	11.2014	-0.838443	88.676	-0.0663756
15.9627	174.558	11.201	-0.837988	88.6734	-0.0663396
15.971	174.64	11.2007	-0.837516	88.6709	-0.0663022
15.9793	174.725	11.2004	-0.837049	88.6684	-0.0662653
15.9877	174.81	11.2001	-0.836557	88.6661	-0.0662263
15.996	174.894	11.1998	-0.836081	88.6635	-0.0661886
16.0043	174.974	11.1995	-0.835635	88.6611	-0.0661534
16.0127	175.059	11.1992	-0.835159	88.6585	-0.0661156
16.021	175.146	11.1989	-0.834677	88.6561	-0.0660775
16.0293	175.225	11.1986	-0.834209	88.6539	-0.0660404
16.0377	175.31	11.1983	-0.833735	88.6516	-0.0660029
16.046	175.392	11.198	-0.833264	88.6494	-0.0659656
16.0543	175.477	11.1977	-0.832806	88.647	-0.0659294
16.0627	175.56	11.1974	-0.832352	88.6446	-0.0658935
16.071	175.644	11.1971	-0.831886	88.6421	-0.0658565
16.0793	175.727	11.1968	-0.831434	88.6399	-0.0658208
16.0877	175.812	11.1965	-0.830949	88.6375	-0.0657824
16.096	175.896	11.1962	-0.83049	88.635	-0.065746
16.1043	175.981	11.1959	-0.830055	88.6326	-0.0657116
16.1127	176.064	11.1956	-0.829606	88.6304	-0.065676
16.121	176.147	11.1953	-0.829157	88.6277	-0.0656405
16.1293	176.229	11.195	-0.8287	88.6253	-0.0656043
16.1377	176.315	11.1947	-0.82825	88.6229	-0.0655687
16.146	176.404	11.1944	-0.827785	88.6207	-0.0655319
16.1543	176.486	11.1941	-0.827338	88.6182	-0.0654965
16.1627	176.565	11.1938	-0.82688	88.6159	-0.0654602
16.171	176.654	11.1935	-0.826411	88.6137	-0.0654231
16.1793	176.731	11.1932	-0.825963	88.6112	-0.0653877
16.1877	176.817	11.1929	-0.825493	88.6088	-0.0653505
16.196	176.903	11.1926	-0.825061	88.6063	-0.0653162
16.2043	176.987	11.1923	-0.824606	88.604	-0.0652802
16.2127	177.071	11.192	-0.824155	88.6017	-0.0652445
16.221	177.157	11.1917	-0.823734	88.5992	-0.0652112
16.2293	177.244	11.1913	-0.823303	88.5966	-0.0651771
16.2377	177.326	11.191	-0.822836	88.5943	-0.0651401
16.246	177.408	11.1907	-0.82237	88.5916	-0.0651032
16.2543	177.491	11.1904	-0.821954	88.5893	-0.0650702
16.2627	177.578	11.1901	-0.821529	88.5871	-0.0650366
16.271	177.661	11.1898	-0.821081	88.5848	-0.0650012
16.2793	177.744	11.1895	-0.820628	88.5824	-0.0649653
16.2877	177.83	11.1892	-0.82017	88.58	-0.0649291
16.296	177.915	11.189	-0.819692	88.5777	-0.0648912
16.3043	177.996	11.1887	-0.819215	88.5754	-0.0648534
16.3127	178.078	11.1884	-0.818778	88.5731	-0.0648188
16.321	178.167	11.1881	-0.818358	88.5707	-0.0647856
16.3293	178.251	11.1878	-0.817927	88.5684	-0.0647515
16.3377	178.335	11.1875	-0.81746	88.5659	-0.0647145
16.346	178.418	11.1872	-0.816996	88.5635	-0.0646778
16.3543	178.5	11.1869	-0.81656	88.5613	-0.0646433
16.3627	178.585	11.1866	-0.816125	88.5589	-0.0646089
16.371	178.667	11.1863	-0.815693	88.5564	-0.0645746
16.3793	178.754	11.186	-0.815277	88.554	-0.0645417
16.3877	178.839	11.1857	-0.814844	88.5517	-0.0645074
16.396	178.923	11.1853	-0.814409	88.5492	-0.064473
16.4043	179.002	11.1851	-0.813985	88.547	-0.0644394
16.4127	179.087	11.1848	-0.813546	88.5449	-0.0644046
16.421	179.17	11.1845	-0.81312	88.5428	-0.0643709
16.4293	179.261	11.1842	-0.81265	88.5404	-0.0643337
16.4377	179.342	11.1839	-0.812188	88.538	-0.0642972
16.446	179.424	11.1837	-0.811744	88.5357	-0.064262
16.4543	179.51	11.1834	-0.811307	88.5335	-0.0642274
16.4627	179.59	11.1831	-0.810887	88.5314	-0.0641942
16.471	179.674	11.1828	-0.810455	88.5291	-0.06416
16.4793	179.761	11.1825	-0.810001	88.5268	-0.064124
16.4877	179.842	11.1822	-0.809547	88.5244	-0.0640881
16.496	179.928	11.1819	-0.80912	88.522	-0.0640542
16.5043	180.012	11.1816	-0.80872	88.5197	-0.0640226
16.5127	180.094	11.1813	-0.808326	88.5174	-0.0639914
16.521	180.179	11.1811	-0.807903	88.5152	-0.0639579
16.5293	180.262	11.1808	-0.807467	88.513	-0.0639234
16.5377	180.345	11.1805	-0.807027	88.5107	-0.0638886
16.546	180.429	11.1802	-0.806578	88.5084	-0.0638531
16.5543	180.511	11.1799	-0.806147	88.5061	-0.0638189
16.5627	180.594	11.1797	-0.805713	88.5041	-0.0637845
16.571	180.682	11.1794	-0.805306	88.5018	-0.0637523
16.5793	180.765	11.1791	-0.804888	88.4996	-0.0637193
16.5877	180.85	11.1788	-0.804442	88.4973	-0.0636839
16.596	180.935	11.1785	-0.803975	88.4952	-0.063647
16.6043	181.018	11.1782	-0.803557	88.4928	-0.0636139
16.6127	181.103	11.178	-0.803133	88.4907	-0.0635803
16.621	181.189	11.1777	-0.802722	88.4885	-0.0635478
16.6293	181.27	11.1774	-0.802309	88.4861	-0.0635151
16.6377	181.353	11.1771	-0.801882	88.4839	-0.0634813
16.646	181.435	11.1768	-0.801475	88.4814	-0.063449
[truncated: 9,866 more rows]
