# Supplementary material for: Comparative study on mechanisms for improving mechanical properties and microstructure of cement paste modified by different types of nanomaterials
Source: publisher site journal article supplement (doi:10.1515/ntrev-2021-0027), 2021-01-01
Supplement: Supplementary file 15 [file NS-6-7d.xlsx]

## Sheet: Sheet1
Time (min)	Temperature (°C)	Weight (mg)			Temperature Difference (°C/mg)
0.000733333	18.8323	13.5991	-0.760124	100	-0.0558951
0.00433333	18.8365	13.5985	-0.761828	99.9954	-0.0560204
0.0126667	18.8336	13.5977	-0.76195	99.9896	-0.0560294
0.021	18.8305	13.5969	-0.76217	99.9839	-0.0560456
0.0293333	18.8318	13.5962	-0.762393	99.9787	-0.056062
0.0376667	18.8267	13.5955	-0.76266	99.9732	-0.0560816
0.046	18.8389	13.5946	-0.762973	99.9672	-0.0561046
0.0543333	18.8301	13.5939	-0.763329	99.9614	-0.0561308
0.0626667	18.836	13.5931	-0.763751	99.9557	-0.0561618
0.071	18.8302	13.5923	-0.764242	99.9501	-0.056198
0.0793333	18.8292	13.5915	-0.764787	99.9444	-0.056238
0.0876667	18.8309	13.5909	-0.765291	99.9393	-0.0562751
0.096	18.8355	13.5902	-0.765804	99.9343	-0.0563128
0.104333	18.8292	13.5895	-0.766297	99.9292	-0.0563491
0.112667	18.8296	13.5887	-0.766869	99.9235	-0.0563911
0.121	18.8245	13.588	-0.767413	99.9181	-0.0564311
0.129333	18.8173	13.5873	-0.767965	99.9131	-0.0564717
0.137667	18.8228	13.5866	-0.768501	99.9079	-0.0565111
0.146	18.8254	13.5859	-0.76905	99.9026	-0.0565515
0.154333	18.8236	13.5852	-0.769611	99.8974	-0.0565928
0.162667	18.8136	13.5845	-0.7702	99.8922	-0.056636
0.171	18.8187	13.5837	-0.770837	99.8867	-0.0566829
0.179333	18.826	13.583	-0.771479	99.8813	-0.0567301
0.187667	18.8208	13.5823	-0.772098	99.8761	-0.0567756
0.196	18.8286	13.5815	-0.772716	99.8708	-0.0568211
0.204333	18.829	13.5809	-0.773396	99.8658	-0.0568711
0.212667	18.8346	13.5802	-0.774047	99.8607	-0.056919
0.221	18.8292	13.5795	-0.774763	99.8555	-0.0569716
0.229333	18.828	13.5788	-0.7755	99.8504	-0.0570258
0.237667	18.8302	13.5781	-0.776222	99.8453	-0.0570789
0.246	18.8305	13.5773	-0.776943	99.84	-0.0571319
0.254333	18.8295	13.5767	-0.777711	99.835	-0.0571884
0.262667	18.8358	13.576	-0.778464	99.83	-0.0572437
0.271	18.8421	13.5753	-0.779257	99.8248	-0.0573021
0.279333	18.8456	13.5746	-0.780066	99.8197	-0.0573615
0.287667	18.8411	13.5739	-0.780882	99.8144	-0.0574216
0.296	18.8477	13.5731	-0.781755	99.809	-0.0574858
0.304333	18.8491	13.5724	-0.782618	99.8037	-0.0575492
0.312667	18.8546	13.5717	-0.783544	99.7982	-0.0576173
0.321	18.8593	13.571	-0.784487	99.793	-0.0576867
0.329333	18.8615	13.5702	-0.78544	99.7876	-0.0577567
0.337667	18.8727	13.5695	-0.786415	99.7823	-0.0578284
0.346	18.8827	13.5688	-0.78738	99.777	-0.0578994
0.354333	18.88	13.568	-0.788409	99.7715	-0.0579751
0.362667	18.8908	13.5673	-0.789444	99.766	-0.0580511
0.371	18.9001	13.5666	-0.790484	99.7606	-0.0581276
0.379333	18.9036	13.5658	-0.791576	99.7554	-0.0582079
0.387667	18.9174	13.5651	-0.792731	99.7502	-0.0582928
0.396	18.921	13.5644	-0.793848	99.7449	-0.058375
0.404333	18.939	13.5637	-0.795011	99.7394	-0.0584605
0.412667	18.9423	13.5629	-0.796157	99.734	-0.0585448
0.421	18.9534	13.5622	-0.797338	99.7287	-0.0586317
0.429333	18.9658	13.5615	-0.798566	99.7231	-0.058722
0.437667	18.975	13.5608	-0.799799	99.7179	-0.0588126
0.446	18.9888	13.56	-0.801063	99.7126	-0.0589055
0.454333	19.0075	13.5593	-0.802393	99.707	-0.0590034
0.462667	19.012	13.5585	-0.80375	99.7017	-0.0591031
0.471	19.0298	13.5578	-0.805115	99.6965	-0.0592035
0.479333	19.0463	13.5571	-0.806475	99.6909	-0.0593035
0.487667	19.0547	13.5563	-0.807858	99.6852	-0.0594052
0.496	19.0669	13.5555	-0.80937	99.6795	-0.0595164
0.504333	19.0819	13.5548	-0.810819	99.6741	-0.059623
0.512667	19.1009	13.554	-0.812356	99.6685	-0.059736
0.521	19.113	13.5533	-0.813869	99.6628	-0.0598473
0.529333	19.1309	13.5525	-0.815398	99.6573	-0.0599597
0.537667	19.1506	13.5518	-0.816968	99.6518	-0.0600751
0.546	19.1706	13.551	-0.81855	99.6462	-0.0601915
0.554333	19.1932	13.5502	-0.820152	99.6402	-0.0603093
0.562667	19.2138	13.5494	-0.82179	99.6345	-0.0604297
0.571	19.2315	13.5487	-0.823462	99.6291	-0.0605527
0.579333	19.2524	13.5479	-0.825095	99.6237	-0.0606727
0.587667	19.2745	13.5472	-0.826849	99.6181	-0.0608017
0.596	19.3017	13.5464	-0.82857	99.6124	-0.0609283
0.604333	19.318	13.5456	-0.830344	99.6065	-0.0610587
0.612667	19.3415	13.5448	-0.832156	99.6009	-0.061192
0.621	19.3734	13.5441	-0.833976	99.5952	-0.0613258
0.629333	19.3967	13.5433	-0.835797	99.5895	-0.0614597
0.637667	19.4201	13.5425	-0.837646	99.5839	-0.0615956
0.646	19.452	13.5418	-0.839497	99.5784	-0.0617318
0.654333	19.4762	13.541	-0.841385	99.5727	-0.0618706
0.662667	19.5076	13.5402	-0.843321	99.5668	-0.0620129
0.671	19.5349	13.5394	-0.845256	99.5609	-0.0621553
0.679333	19.5644	13.5387	-0.847216	99.5554	-0.0622994
0.687667	19.5883	13.5379	-0.849196	99.5502	-0.062445
0.696	19.6205	13.5372	-0.851219	99.5445	-0.0625937
0.704333	19.6578	13.5364	-0.853216	99.5389	-0.0627405
0.712667	19.6835	13.5356	-0.855249	99.5331	-0.0628901
0.721	19.7268	13.5349	-0.857297	99.5277	-0.0630407
0.729333	19.7581	13.5341	-0.859412	99.5221	-0.0631962
0.737667	19.7992	13.5333	-0.861487	99.5162	-0.0633488
0.746	19.8377	13.5326	-0.863564	99.5106	-0.0635015
0.754333	19.8654	13.5318	-0.865615	99.5047	-0.0636523
0.762667	19.9008	13.5309	-0.867711	99.4987	-0.0638064
0.771	19.941	13.5301	-0.869824	99.4925	-0.0639618
0.779333	19.9827	13.5293	-0.87199	99.4865	-0.0641211
0.787667	20.0151	13.5285	-0.874151	99.4805	-0.06428
0.796	20.0584	13.5276	-0.876297	99.4745	-0.0644379
0.804333	20.1027	13.5268	-0.878425	99.4683	-0.0645943
0.812667	20.1391	13.526	-0.880548	99.4625	-0.0647504
0.821	20.1852	13.5252	-0.882731	99.4568	-0.064911
0.829333	20.2325	13.5244	-0.884922	99.4507	-0.0650721
0.837667	20.2791	13.5236	-0.887169	99.4446	-0.0652373
0.846	20.3231	13.5228	-0.88942	99.4386	-0.0654028
0.854333	20.3712	13.5219	-0.891676	99.4325	-0.0655687
0.862667	20.419	13.5211	-0.893897	99.4266	-0.065732
0.871	20.4643	13.5203	-0.896165	99.4207	-0.0658988
0.879333	20.5042	13.5195	-0.89846	99.4147	-0.0660676
0.887667	20.5597	13.5187	-0.900811	99.4088	-0.0662404
0.896	20.6131	13.5179	-0.903172	99.4025	-0.066414
0.904333	20.6583	13.517	-0.905541	99.3964	-0.0665883
0.912667	20.7079	13.5162	-0.907946	99.3903	-0.0667651
0.921	20.7666	13.5154	-0.910309	99.3844	-0.0669389
0.929333	20.8156	13.5146	-0.912661	99.3786	-0.0671118
0.937667	20.8694	13.5138	-0.915004	99.3726	-0.0672841
0.946	20.9207	13.5129	-0.917369	99.3662	-0.0674581
0.954333	20.978	13.512	-0.919759	99.3597	-0.0676338
0.962667	21.0336	13.5112	-0.92215	99.3534	-0.0678096
0.971	21.0897	13.5103	-0.924538	99.3471	-0.0679851
0.979333	21.1482	13.5095	-0.926901	99.3409	-0.0681589
0.987667	21.2057	13.5086	-0.929313	99.3345	-0.0683363
0.996	21.2666	13.5077	-0.931733	99.3281	-0.0685142
1.00433	21.3208	13.5069	-0.934187	99.3216	-0.0686947
1.01267	21.3782	13.506	-0.936658	99.3152	-0.0688764
1.021	21.4391	13.5051	-0.939144	99.3087	-0.0690592
1.02933	21.5014	13.5043	-0.941647	99.3026	-0.0692433
1.03767	21.5675	13.5034	-0.944168	99.2964	-0.0694287
1.046	21.6252	13.5025	-0.946726	99.2899	-0.0696167
1.05433	21.6898	13.5016	-0.949267	99.2831	-0.0698036
1.06267	21.7509	13.5007	-0.95188	99.2764	-0.0699958
1.071	21.8116	13.4998	-0.954434	99.2699	-0.0701835
1.07933	21.882	13.4989	-0.956952	99.2633	-0.0703687
1.08767	21.9458	13.498	-0.959493	99.2566	-0.0705555
1.096	22.0063	13.4971	-0.962066	99.2499	-0.0707448
1.10433	22.0751	13.4962	-0.964697	99.2431	-0.0709383
1.11267	22.1444	13.4953	-0.967285	99.2363	-0.0711286
1.121	22.211	13.4943	-0.969894	99.2294	-0.0713204
1.12933	22.2766	13.4934	-0.972521	99.2227	-0.0715136
1.13767	22.3446	13.4925	-0.975216	99.216	-0.0717117
1.146	22.4189	13.4916	-0.977899	99.2093	-0.071909
1.15433	22.4941	13.4907	-0.980577	99.2025	-0.072106
1.16267	22.5622	13.4897	-0.983272	99.1956	-0.0723041
1.171	22.6398	13.4888	-0.986005	99.1887	-0.0725051
1.17933	22.705	13.4879	-0.988736	99.182	-0.0727059
1.18767	22.7777	13.4869	-0.991407	99.1752	-0.0729023
1.196	22.8522	13.486	-0.994142	99.1683	-0.0731034
1.20433	22.9323	13.4851	-0.996892	99.1616	-0.0733057
1.21267	23.0012	13.4842	-0.99961	99.1549	-0.0735056
1.221	23.082	13.4832	-1.00234	99.148	-0.073706
1.22933	23.1547	13.4823	-1.00506	99.141	-0.073906
1.23767	23.2296	13.4813	-1.00783	99.1339	-0.0741098
1.246	23.3053	13.4804	-1.01062	99.1269	-0.0743152
1.25433	23.3829	13.4794	-1.01341	99.12	-0.0745206
1.26267	23.4573	13.4785	-1.01619	99.1127	-0.0747247
1.271	23.5441	13.4775	-1.01901	99.1056	-0.0749318
1.27933	23.6164	13.4765	-1.02179	99.0985	-0.0751363
1.28767	23.7007	13.4755	-1.02455	99.0913	-0.0753396
1.296	23.7824	13.4746	-1.02736	99.0841	-0.0755458
1.30433	23.862	13.4736	-1.03018	99.0768	-0.0757531
1.31267	23.9402	13.4726	-1.033	99.0696	-0.0759606
1.321	24.0193	13.4716	-1.03582	99.0623	-0.076168
1.32933	24.1039	13.4706	-1.03869	99.0549	-0.076379
1.33767	24.1849	13.4696	-1.04157	99.0478	-0.0765909
1.346	24.2681	13.4686	-1.04446	99.0406	-0.0768033
1.35433	24.3516	13.4677	-1.04733	99.0334	-0.0770147
1.36267	24.4331	13.4667	-1.05024	99.026	-0.0772284
1.371	24.5191	13.4657	-1.05317	99.0186	-0.0774442
1.37933	24.608	13.4647	-1.05608	99.0113	-0.0776581
1.38767	24.6907	13.4637	-1.05894	99.004	-0.0778683
1.396	24.7748	13.4627	-1.06183	98.9967	-0.0780806
1.40433	24.859	13.4617	-1.06474	98.9894	-0.0782945
1.41267	24.9396	13.4607	-1.06766	98.9821	-0.0785093
1.421	25.032	13.4596	-1.07056	98.9745	-0.0787226
1.42933	25.1186	13.4586	-1.07348	98.9669	-0.0789377
1.43767	25.2051	13.4576	-1.07649	98.9591	-0.0791586
1.446	25.2939	13.4565	-1.07946	98.9515	-0.079377
1.45433	25.3853	13.4555	-1.08244	98.9437	-0.0795965
1.46267	25.4714	13.4544	-1.08545	98.9358	-0.0798177
1.471	25.5669	13.4533	-1.08847	98.9279	-0.0800396
1.47933	25.6576	13.4522	-1.09149	98.92	-0.080262
1.48767	25.7396	13.4512	-1.09446	98.9121	-0.0804801
1.496	25.8266	13.4501	-1.09742	98.904	-0.0806977
1.50433	25.9129	13.449	-1.10041	98.896	-0.0809176
1.51267	26.0053	13.4479	-1.10345	98.8881	-0.0811416
1.521	26.0998	13.4468	-1.10645	98.8801	-0.0813616
1.52933	26.1825	13.4457	-1.10951	98.872	-0.0815869
1.53767	26.2817	13.4446	-1.11252	98.8641	-0.0818084
1.546	26.3712	13.4436	-1.11557	98.8561	-0.0820324
1.55433	26.4672	13.4425	-1.11865	98.8482	-0.0822589
1.56267	26.5556	13.4414	-1.1217	98.84	-0.0824834
1.571	26.6452	13.4402	-1.12482	98.8318	-0.0827125
1.57933	26.7368	13.4391	-1.12794	98.8237	-0.0829425
1.58767	26.8264	13.438	-1.13104	98.8155	-0.0831703
1.596	26.9231	13.4369	-1.13412	98.8073	-0.0833963
1.60433	27.0181	13.4358	-1.13722	98.7993	-0.0836246
1.61267	27.1157	13.4347	-1.14028	98.7911	-0.0838498
1.621	27.2046	13.4336	-1.14338	98.7828	-0.0840773
1.62933	27.2956	13.4324	-1.14648	98.7745	-0.0843054
1.63767	27.3905	13.4313	-1.14958	98.7659	-0.0845335
1.646	27.4874	13.4302	-1.1527	98.7576	-0.084763
1.65433	27.5778	13.429	-1.15585	98.7493	-0.0849943
1.66267	27.6768	13.4278	-1.15898	98.7406	-0.0852243
1.671	27.7683	13.4267	-1.16212	98.7321	-0.0854559
1.67933	27.8668	13.4255	-1.16525	98.7234	-0.0856859
1.68767	27.9591	13.4243	-1.16839	98.7145	-0.0859166
1.696	28.055	13.4231	-1.17155	98.7057	-0.0861489
1.70433	28.1493	13.4219	-1.1747	98.6968	-0.0863803
1.71267	28.2501	13.4207	-1.17789	98.6879	-0.0866149
1.721	28.3432	13.4195	-1.18106	98.679	-0.086848
1.72933	28.441	13.4182	-1.18428	98.67	-0.087085
1.73767	28.537	13.417	-1.18748	98.6609	-0.0873207
1.746	28.6321	13.4158	-1.19069	98.652	-0.0875567
1.75433	28.7266	13.4146	-1.19388	98.643	-0.0877907
1.76267	28.8264	13.4133	-1.19709	98.634	-0.0880269
1.771	28.9194	13.4121	-1.20031	98.6249	-0.0882637
1.77933	29.014	13.4109	-1.2035	98.6159	-0.0884981
1.78767	29.1126	13.4096	-1.2067	98.6067	-0.088734
1.796	29.2052	13.4084	-1.20988	98.5975	-0.0889672
1.80433	29.3014	13.4071	-1.21308	98.5882	-0.0892028
1.81267	29.4013	13.4059	-1.21626	98.5792	-0.089437
1.821	29.4953	13.4047	-1.21943	98.5701	-0.0896701
1.82933	29.5912	13.4034	-1.2226	98.5607	-0.0899032
1.83767	29.6866	13.4021	-1.22584	98.5512	-0.0901415
1.846	29.784	13.4008	-1.22901	98.5419	-0.090374
1.85433	29.8805	13.3995	-1.23218	98.5325	-0.0906073
1.86267	29.9818	13.3982	-1.2354	98.5229	-0.0908445
1.871	30.0806	13.397	-1.23863	98.5136	-0.0910819
1.87933	30.1788	13.3957	-1.24187	98.504	-0.0913199
1.88767	30.2714	13.3944	-1.24509	98.4948	-0.0915569
1.896	30.3785	13.3931	-1.24832	98.485	-0.0917939
1.90433	30.4691	13.3918	-1.25161	98.4753	-0.0920358
1.91267	30.5657	13.3904	-1.25492	98.4656	-0.0922792
1.921	30.6606	13.3891	-1.25818	98.456	-0.0925196
1.92933	30.7606	13.3878	-1.26151	98.4461	-0.0927638
1.93767	30.855	13.3865	-1.26478	98.4363	-0.0930045
1.946	30.9536	13.3852	-1.26808	98.4267	-0.093247
1.95433	31.0558	13.3838	-1.27137	98.4168	-0.0934888
1.96267	31.1502	13.3825	-1.27465	98.4069	-0.0937305
1.971	31.2512	13.3811	-1.27797	98.3968	-0.0939743
1.97933	31.3466	13.3797	-1.28126	98.387	-0.0942168
1.98767	31.4443	13.3784	-1.2845	98.377	-0.0944545
1.996	31.5367	13.3771	-1.28773	98.3672	-0.0946919
2.00433	31.6372	13.3757	-1.29096	98.3573	-0.09493
2.01267	31.731	13.3744	-1.29421	98.3475	-0.0951684
2.021	31.8255	13.373	-1.29751	98.3373	-0.0954112
2.02933	31.9294	13.3716	-1.30077	98.3269	-0.0956513
2.03767	32.0259	13.3702	-1.30401	98.3167	-0.0958894
2.046	32.1195	13.3688	-1.30726	98.3065	-0.0961285
2.05433	32.2216	13.3674	-1.31049	98.2964	-0.0963659
2.06267	32.3148	13.366	-1.31374	98.2861	-0.0966046
2.071	32.4151	13.3646	-1.317	98.2758	-0.0968449
2.07933	32.5172	13.3632	-1.32028	98.2655	-0.0970856
2.08767	32.6051	13.3618	-1.32354	98.255	-0.0973258
2.096	32.7132	13.3604	-1.32683	98.2445	-0.0975675
2.10433	32.8046	13.359	-1.33011	98.2344	-0.0978083
2.11267	32.905	13.3576	-1.33337	98.2241	-0.0980481
2.121	33.0004	13.3562	-1.33671	98.2136	-0.0982942
2.12933	33.0983	13.3548	-1.34	98.2032	-0.0985358
2.13767	33.1972	13.3533	-1.3433	98.1925	-0.0987785
2.146	33.2896	13.3519	-1.34662	98.1819	-0.0990228
2.15433	33.3852	13.3504	-1.3499	98.1711	-0.0992641
2.16267	33.4803	13.3489	-1.35319	98.1603	-0.0995055
2.171	33.5784	13.3475	-1.35645	98.1496	-0.0997458
2.17933	33.6709	13.346	-1.35971	98.1388	-0.0999855
2.18767	33.7685	13.3445	-1.36298	98.1281	-0.100226
2.196	33.8679	13.3431	-1.36628	98.1175	-0.100468
2.20433	33.9602	13.3417	-1.36951	98.1069	-0.100706
2.21267	34.0554	13.3402	-1.37276	98.0961	-0.100945
2.221	34.1493	13.3387	-1.37599	98.0853	-0.101182
2.22933	34.2452	13.3372	-1.37922	98.0744	-0.10142
2.23767	34.3416	13.3358	-1.38248	98.0635	-0.10166
2.246	34.4334	13.3343	-1.38575	98.0526	-0.1019
2.25433	34.5347	13.3328	-1.38903	98.0416	-0.102141
2.26267	34.6265	13.3313	-1.39233	98.0305	-0.102384
2.271	34.7237	13.3297	-1.3956	98.0192	-0.102624
2.27933	34.8127	13.3282	-1.39884	98.0077	-0.102863
2.28767	34.9093	13.3267	-1.4021	97.9965	-0.103103
2.296	35.0004	13.3251	-1.40538	97.9851	-0.103343
2.30433	35.0931	13.3235	-1.40863	97.9737	-0.103583
2.31267	35.1949	13.322	-1.41189	97.9624	-0.103822
2.321	35.2884	13.3204	-1.41514	97.9509	-0.104062
2.32933	35.3763	13.3189	-1.41837	97.9394	-0.104299
2.33767	35.4758	13.3173	-1.42161	97.9277	-0.104537
2.346	35.5674	13.3157	-1.42482	97.9163	-0.104773
2.35433	35.663	13.3142	-1.42803	97.905	-0.105009
2.36267	35.749	13.3127	-1.43126	97.8936	-0.105246
2.371	35.8452	13.3111	-1.43445	97.8821	-0.105481
2.37933	35.939	13.3095	-1.43766	97.8705	-0.105718
2.38767	36.0312	13.3079	-1.44089	97.8589	-0.105955
2.396	36.124	13.3064	-1.44408	97.8472	-0.106189
2.40433	36.2127	13.3048	-1.44729	97.8354	-0.106425
2.41267	36.3034	13.3032	-1.45051	97.8238	-0.106662
2.421	36.4001	13.3016	-1.45369	97.8122	-0.106896
2.42933	36.4928	13.3	-1.45688	97.8004	-0.10713
2.43767	36.5846	13.2984	-1.46007	97.7885	-0.107365
2.446	36.678	13.2967	-1.46326	97.7766	-0.1076
2.45433	36.7682	13.2951	-1.46644	97.7648	-0.107834
2.46267	36.8594	13.2935	-1.46966	97.7529	-0.108071
2.471	36.9516	13.2919	-1.47285	97.741	-0.108305
2.47933	37.049	13.2903	-1.47608	97.7289	-0.108543
2.48767	37.1353	13.2886	-1.47927	97.7169	-0.108777
2.496	37.2192	13.287	-1.48246	97.7049	-0.109011
2.50433	37.3151	13.2854	-1.48564	97.6929	-0.109246
2.51267	37.4124	13.2837	-1.48883	97.6807	-0.10948
2.521	37.497	13.2821	-1.49199	97.6686	-0.109713
2.52933	37.5832	13.2804	-1.49516	97.6564	-0.109945
2.53767	37.6768	13.2787	-1.49834	97.644	-0.110179
2.546	37.7627	13.277	-1.50147	97.6318	-0.110409
2.55433	37.856	13.2754	-1.50464	97.6193	-0.110642
2.56267	37.9454	13.2737	-1.50775	97.6072	-0.110871
2.571	38.028	13.272	-1.51086	97.5949	-0.1111
2.57933	38.119	13.2703	-1.51395	97.5823	-0.111328
2.58767	38.2114	13.2686	-1.51705	97.5699	-0.111555
2.596	38.3047	13.2669	-1.52015	97.5574	-0.111783
2.60433	38.3941	13.2652	-1.52328	97.5448	-0.112014
2.61267	38.4813	13.2635	-1.52639	97.532	-0.112242
2.621	38.5663	13.2618	-1.52948	97.5193	-0.112469
2.62933	38.6554	13.26	-1.53255	97.5066	-0.112695
2.63767	38.7418	13.2583	-1.53558	97.4941	-0.112918
2.646	38.8325	13.2566	-1.5386	97.4816	-0.11314
2.65433	38.9146	13.2549	-1.54164	97.4687	-0.113363
2.66267	39.0037	13.2532	-1.54474	97.4561	-0.113592
2.671	39.0864	13.2514	-1.54786	97.4433	-0.11382
2.67933	39.1711	13.2497	-1.55097	97.4306	-0.114049
2.68767	39.2625	13.248	-1.554	97.4181	-0.114272
2.696	39.3501	13.2463	-1.55705	97.4053	-0.114496
2.70433	39.434	13.2445	-1.56005	97.3926	-0.114717
2.71267	39.5213	13.2428	-1.56309	97.3799	-0.11494
2.721	39.6067	13.241	-1.56618	97.3668	-0.115168
2.72933	39.6974	13.2393	-1.56928	97.3539	-0.115396
2.73767	39.7794	13.2376	-1.57237	97.3413	-0.115623
2.746	39.8606	13.2358	-1.57541	97.3285	-0.115846
2.75433	39.946	13.234	-1.57842	97.3153	-0.116068
2.76267	40.0404	13.2323	-1.5814	97.3024	-0.116287
2.771	40.1183	13.2305	-1.58441	97.2892	-0.116509
2.77933	40.2053	13.2287	-1.58747	97.2761	-0.116733
2.78767	40.2952	13.2269	-1.59056	97.2633	-0.116961
2.796	40.3743	13.2252	-1.59359	97.2503	-0.117184
2.80433	40.4626	13.2234	-1.59657	97.2374	-0.117402
2.81267	40.5495	13.2216	-1.5996	97.2243	-0.117625
2.821	40.6315	13.2198	-1.60259	97.2111	-0.117845
2.82933	40.714	13.2181	-1.60556	97.1981	-0.118064
2.83767	40.796	13.2163	-1.60857	97.1852	-0.118285
2.846	40.8841	13.2145	-1.6116	97.1721	-0.118508
2.85433	40.9639	13.2128	-1.61459	97.159	-0.118727
2.86267	41.0488	13.211	-1.61754	97.1459	-0.118944
2.871	41.1356	13.2091	-1.62048	97.1324	-0.11916
2.87933	41.218	13.2073	-1.62342	97.1189	-0.119377
2.88767	41.3052	13.2055	-1.62638	97.1056	-0.119594
2.896	41.3839	13.2037	-1.62932	97.0923	-0.11981
2.90433	41.4592	13.2019	-1.63226	97.079	-0.120027
2.91267	41.5508	13.2001	-1.6352	97.0656	-0.120243
2.921	41.6325	13.1982	-1.63807	97.0522	-0.120455
2.92933	41.7207	13.1964	-1.64092	97.0387	-0.120664
2.93767	41.7936	13.1946	-1.64381	97.0252	-0.120876
2.946	41.8818	13.1927	-1.64669	97.0117	-0.121088
2.95433	41.9563	13.1909	-1.64962	96.9983	-0.121303
2.96267	42.0472	13.1891	-1.65254	96.9849	-0.121518
2.971	42.1237	13.1873	-1.6554	96.9715	-0.121729
2.97933	42.2038	13.1854	-1.65826	96.9581	-0.121939
2.98767	42.2835	13.1836	-1.66111	96.9444	-0.122148
2.996	42.3636	13.1817	-1.66394	96.9309	-0.122357
3.00433	42.4426	13.1799	-1.66684	96.9174	-0.122569
3.01267	42.5262	13.1781	-1.6697	96.9038	-0.12278
3.021	42.6091	13.1762	-1.67254	96.8902	-0.122989
3.02933	42.6922	13.1744	-1.67539	96.8766	-0.123199
3.03767	42.7637	13.1725	-1.67817	96.863	-0.123403
3.046	42.8493	13.1707	-1.68094	96.8494	-0.123607
3.05433	42.9293	13.1688	-1.6837	96.8358	-0.123809
3.06267	43.008	13.167	-1.68645	96.8222	-0.124012
3.071	43.0938	13.1651	-1.68923	96.8086	-0.124216
3.07933	43.1759	13.1633	-1.69199	96.795	-0.124419
3.08767	43.2478	13.1614	-1.6947	96.7812	-0.124619
3.096	43.3289	13.1595	-1.69744	96.7677	-0.12482
3.10433	43.4151	13.1577	-1.70016	96.7539	-0.12502
3.11267	43.4913	13.1558	-1.70283	96.7403	-0.125216
3.121	43.5741	13.154	-1.70552	96.7266	-0.125414
3.12933	43.6541	13.1521	-1.70819	96.7129	-0.12561
3.13767	43.7384	13.1502	-1.71092	96.699	-0.125811
3.146	43.8138	13.1483	-1.71361	96.6852	-0.126009
3.15433	43.8943	13.1465	-1.71626	96.6715	-0.126204
3.16267	43.968	13.1446	-1.71889	96.6578	-0.126397
3.171	44.0493	13.1427	-1.72151	96.644	-0.12659
3.17933	44.1236	13.1408	-1.72409	96.6301	-0.12678
3.18767	44.2071	13.139	-1.72669	96.6163	-0.126971
3.196	44.2826	13.1371	-1.72928	96.6026	-0.127161
3.20433	44.3635	13.1352	-1.73185	96.5887	-0.127351
3.21267	44.4362	13.1333	-1.73445	96.5749	-0.127541
3.221	44.515	13.1314	-1.737	96.561	-0.127729
3.22933	44.5944	13.1295	-1.73952	96.5469	-0.127914
3.23767	44.6704	13.1276	-1.74207	96.5328	-0.128101
3.246	44.7532	13.1257	-1.74459	96.5188	-0.128287
3.25433	44.8292	13.1238	-1.74711	96.505	-0.128473
3.26267	44.9082	13.1219	-1.74964	96.4911	-0.128659
3.271	44.9856	13.1201	-1.75218	96.4773	-0.128845
3.27933	45.0631	13.1182	-1.75466	96.4636	-0.129028
3.28767	45.1391	13.1163	-1.75712	96.4498	-0.129209
3.296	45.2214	13.1144	-1.75956	96.436	-0.129388
3.30433	45.3033	13.1126	-1.76198	96.4223	-0.129566
3.31267	45.3751	13.1107	-1.7644	96.4085	-0.129744
3.321	45.4516	13.1088	-1.76677	96.3948	-0.129918
3.32933	45.5284	13.1069	-1.76917	96.3809	-0.130094
3.33767	45.6035	13.105	-1.77152	96.3669	-0.130267
3.346	45.685	13.1031	-1.77382	96.3529	-0.130437
3.35433	45.7596	13.1012	-1.77612	96.3386	-0.130606
3.36267	45.8362	13.0992	-1.77845	96.3242	-0.130777
3.371	45.9152	13.0973	-1.78074	96.3103	-0.130946
3.37933	45.991	13.0954	-1.78306	96.2964	-0.131116
3.38767	46.0693	13.0936	-1.78536	96.2824	-0.131285
3.396	46.1513	13.0916	-1.78759	96.2682	-0.131449
3.40433	46.2239	13.0897	-1.78981	96.254	-0.131612
3.41267	46.3048	13.0878	-1.79201	96.24	-0.131774
3.421	46.3746	13.0859	-1.79425	96.2261	-0.131939
3.42933	46.4606	13.084	-1.7965	96.2125	-0.132104
3.43767	46.5333	13.0822	-1.79864	96.1989	-0.132261
3.446	46.6063	13.0803	-1.80075	96.1853	-0.132417
3.45433	46.6843	13.0785	-1.80289	96.1717	-0.132574
3.46267	46.7616	13.0766	-1.80495	96.1577	-0.132726
3.471	46.8405	13.0747	-1.80697	96.1439	-0.132874
3.47933	46.9188	13.0729	-1.80901	96.1302	-0.133024
3.48767	46.9972	13.071	-1.81104	96.1164	-0.133174
3.496	47.0696	13.0691	-1.81302	96.1026	-0.133319
3.50433	47.1423	13.0672	-1.81496	96.0888	-0.133462
3.51267	47.2211	13.0653	-1.81688	96.0749	-0.133602
3.521	47.299	13.0634	-1.81881	96.0611	-0.133745
3.52933	47.3668	13.0616	-1.82074	96.0472	-0.133887
3.53767	47.4435	13.0597	-1.82263	96.0333	-0.134026
3.546	47.5199	13.0578	-1.82451	96.0196	-0.134164
3.55433	47.5989	13.0559	-1.82638	96.0058	-0.134301
3.56267	47.6717	13.0541	-1.82824	95.9922	-0.134438
3.571	47.7448	13.0522	-1.83006	95.9786	-0.134572
3.57933	47.822	13.0503	-1.83191	95.9647	-0.134708
3.58767	47.9	13.0485	-1.8337	95.9511	-0.13484
3.596	47.979	13.0466	-1.83546	95.9375	-0.134969
3.60433	48.0548	13.0448	-1.8372	95.924	-0.135097
3.61267	48.1348	13.043	-1.83892	95.9104	-0.135224
3.621	48.2044	13.0411	-1.8406	95.8966	-0.135347
3.62933	48.2822	13.0393	-1.84227	95.8832	-0.13547
3.63767	48.3589	13.0374	-1.84392	95.8699	-0.135591
3.646	48.4355	13.0356	-1.84555	95.8564	-0.135711
3.65433	48.51	13.0338	-1.84712	95.8428	-0.135826
3.66267	48.5854	13.032	-1.84866	95.8297	-0.13594
3.671	48.6585	13.0302	-1.85018	95.8169	-0.136052
3.67933	48.7303	13.0284	-1.8517	95.8033	-0.136164
3.68767	48.8127	13.0266	-1.85317	95.7898	-0.136271
3.696	48.886	13.0247	-1.85462	95.7764	-0.136378
3.70433	48.9594	13.0229	-1.85601	95.7632	-0.13648
3.71267	49.0401	13.0211	-1.85741	95.7498	-0.136583
3.721	49.1124	13.0193	-1.85882	95.7365	-0.136687
3.72933	49.186	13.0175	-1.86018	95.7233	-0.136787
3.73767	49.2642	13.0158	-1.86156	95.7104	-0.136888
3.746	49.3398	13.014	-1.86291	95.6973	-0.136988
3.75433	49.4159	13.0122	-1.86422	95.684	-0.137084
3.76267	49.4931	13.0104	-1.86548	95.671	-0.137177
3.771	49.5738	13.0086	-1.86679	95.6579	-0.137273
3.77933	49.6509	13.0068	-1.86799	95.6448	-0.137361
3.78767	49.7247	13.0051	-1.86918	95.6317	-0.137449
3.796	49.7999	13.0033	-1.87035	95.6187	-0.137535
3.80433	49.8728	13.0015	-1.87147	95.6054	-0.137617
3.81267	49.9485	12.9997	-1.87257	95.5923	-0.137698
3.821	50.0307	12.9979	-1.87366	95.5792	-0.137778
3.82933	50.1016	12.9961	-1.87465	95.566	-0.137851
3.83767	50.1834	12.9943	-1.87568	95.5529	-0.137927
3.846	50.2511	12.9926	-1.87674	95.5398	-0.138005
3.85433	50.3265	12.9908	-1.87771	95.5271	-0.138076
3.86267	50.4048	12.9891	-1.87869	95.5144	-0.138148
3.871	50.4825	12.9874	-1.87966	95.5018	-0.138219
3.87933	50.5663	12.9856	-1.88058	95.489	-0.138287
3.88767	50.6394	12.9839	-1.8815	95.4763	-0.138355
3.896	50.7088	12.9822	-1.88238	95.4637	-0.13842
3.90433	50.7864	12.9805	-1.8832	95.4509	-0.138479
3.91267	50.864	12.9787	-1.88407	95.4382	-0.138544
3.921	50.9409	12.977	-1.88485	95.4254	-0.138601
3.92933	51.0173	12.9753	-1.88557	95.4129	-0.138654
3.93767	51.0944	12.9736	-1.88629	95.4003	-0.138707
3.946	51.1692	12.9719	-1.88698	95.3877	-0.138758
3.95433	51.2449	12.9701	-1.88769	95.3748	-0.138809
3.96267	51.3254	12.9684	-1.88833	95.3623	-0.138857
3.971	51.3961	12.9667	-1.88894	95.3497	-0.138902
3.97933	51.4798	12.965	-1.88953	95.3374	-0.138945
3.98767	51.5608	12.9634	-1.89013	95.3253	-0.138989
3.996	51.6379	12.9617	-1.89065	95.313	-0.139027
4.00433	51.7109	12.96	-1.89116	95.3006	-0.139065
4.01267	51.7829	12.9584	-1.89166	95.2884	-0.139102
4.021	51.8611	12.9567	-1.8921	95.2761	-0.139134
4.02933	51.9443	12.955	-1.89256	95.264	-0.139168
4.03767	52.0199	12.9534	-1.89295	95.252	-0.139197
4.046	52.0947	12.9518	-1.89335	95.2398	-0.139226
4.05433	52.174	12.9501	-1.89374	95.2276	-0.139255
4.06267	52.2445	12.9484	-1.8941	95.2154	-0.139281
4.071	52.329	12.9468	-1.89444	95.2033	-0.139306
4.07933	52.4034	12.9452	-1.89472	95.1912	-0.139327
4.08767	52.484	12.9435	-1.89502	95.1791	-0.139349
4.096	52.5614	12.9418	-1.8953	95.1668	-0.13937
4.10433	52.637	12.9402	-1.89558	95.1545	-0.13939
4.11267	52.7174	12.9385	-1.89577	95.1423	-0.139404
4.121	52.7926	12.9369	-1.89592	95.1303	-0.139415
4.12933	52.8676	12.9353	-1.89607	95.1186	-0.139426
4.13767	52.9489	12.9337	-1.89618	95.107	-0.139434
4.146	53.0259	12.9321	-1.89626	95.0952	-0.13944
4.15433	53.1095	12.9305	-1.89631	95.0834	-0.139444
4.16267	53.1844	12.9289	-1.89638	95.0719	-0.139449
4.171	53.2619	12.9274	-1.89642	95.0603	-0.139451
4.17933	53.3368	12.9258	-1.8964	95.0489	-0.13945
4.18767	53.4173	12.9243	-1.89639	95.0375	-0.139449
4.196	53.4978	12.9227	-1.89637	95.0262	-0.139448
4.20433	53.5737	12.9211	-1.89637	95.0146	-0.139448
4.21267	53.6548	12.9195	-1.89634	95.0028	-0.139446
4.221	53.7307	12.918	-1.89627	94.9914	-0.139441
4.22933	53.8058	12.9164	-1.89619	94.9798	-0.139435
4.23767	53.8879	12.9149	-1.8961	94.9684	-0.139428
4.246	53.9709	12.9133	-1.89597	94.9569	-0.139419
4.25433	54.0446	12.9117	-1.89578	94.9455	-0.139405
4.26267	54.1186	12.9102	-1.89562	94.9341	-0.139393
4.271	54.2008	12.9086	-1.89546	94.9227	-0.139381
4.27933	54.2755	12.9071	-1.89528	94.9114	-0.139368
4.28767	54.3582	12.9056	-1.89508	94.9002	-0.139353
4.296	54.4346	12.904	-1.89485	94.8889	-0.139336
4.30433	54.5154	12.9025	-1.89459	94.8776	-0.139317
4.31267	54.5908	12.901	-1.89436	94.8665	-0.1393
4.321	54.6705	12.8995	-1.89405	94.8552	-0.139278
4.32933	54.751	12.8979	-1.89376	94.8439	-0.139256
4.33767	54.8291	12.8964	-1.89349	94.8328	-0.139236
4.346	54.9098	12.8949	-1.89315	94.8215	-0.139211
4.35433	54.9832	12.8934	-1.8928	94.8103	-0.139185
4.36267	55.073	12.8919	-1.89243	94.7993	-0.139158
4.371	55.1434	12.8903	-1.89204	94.7882	-0.13913
4.37933	55.2314	12.8889	-1.89163	94.7774	-0.1391
4.38767	55.3082	12.8874	-1.89119	94.7665	-0.139067
4.396	55.3898	12.8859	-1.89073	94.7554	-0.139033
4.40433	55.4677	12.8844	-1.89031	94.7446	-0.139002
4.41267	55.5483	12.8829	-1.88986	94.7338	-0.138969
4.421	55.624	12.8815	-1.88939	94.723	-0.138935
4.42933	55.7067	12.88	-1.88894	94.7124	-0.138902
4.43767	55.7882	12.8786	-1.88843	94.7018	-0.138864
4.446	55.8667	12.8772	-1.88792	94.6912	-0.138827
4.45433	55.9438	12.8757	-1.88733	94.6807	-0.138784
4.46267	56.0277	12.8743	-1.88677	94.6699	-0.138742
4.471	56.1105	12.8728	-1.88623	94.6591	-0.138702
4.47933	56.1857	12.8714	-1.88566	94.6488	-0.138661
4.48767	56.2726	12.8699	-1.8851	94.638	-0.13862
4.496	56.3518	12.8685	-1.88451	94.6273	-0.138576
4.50433	56.4243	12.867	-1.88392	94.6166	-0.138533
4.51267	56.5067	12.8656	-1.88329	94.6058	-0.138486
4.521	56.5903	12.8641	-1.88264	94.5949	-0.138438
4.52933	56.6705	12.8626	-1.88203	94.5842	-0.138393
4.53767	56.7555	12.8612	-1.88142	94.5735	-0.138349
4.546	56.8353	12.8597	-1.8808	94.563	-0.138303
4.55433	56.916	12.8583	-1.88017	94.5526	-0.138257
4.56267	56.9967	12.8569	-1.87951	94.5421	-0.138208
4.571	57.0766	12.8555	-1.87886	94.5318	-0.13816
4.57933	57.1626	12.8541	-1.8782	94.5213	-0.138112
4.58767	57.2436	12.8527	-1.87747	94.511	-0.138058
4.596	57.3269	12.8513	-1.87678	94.5007	-0.138008
4.60433	57.4023	12.8499	-1.8761	94.4906	-0.137958
4.61267	57.486	12.8485	-1.87538	94.4802	-0.137905
4.621	57.5742	12.8471	-1.87466	94.4699	-0.137852
4.62933	57.6508	12.8457	-1.87391	94.4598	-0.137796
4.63767	57.7315	12.8443	-1.87314	94.4495	-0.13774
4.646	57.8146	12.8429	-1.87238	94.4393	-0.137684
4.65433	57.9012	12.8415	-1.87156	94.4291	-0.137624
4.66267	57.9771	12.8401	-1.87077	94.419	-0.137566
4.671	58.0613	12.8388	-1.87004	94.4089	-0.137512
4.67933	58.1422	12.8374	-1.86926	94.3988	-0.137455
4.68767	58.2247	12.836	-1.86847	94.3887	-0.137396
4.696	58.3078	12.8347	-1.86764	94.3788	-0.137336
4.70433	58.3894	12.8333	-1.86683	94.369	-0.137276
4.71267	58.4693	12.832	-1.86602	94.3588	-0.137216
4.721	58.5543	12.8306	-1.86518	94.3487	-0.137154
4.72933	58.6345	12.8292	-1.86434	94.3388	-0.137093
4.73767	58.7125	12.8279	-1.86352	94.3289	-0.137032
4.746	58.796	12.8265	-1.86271	94.319	-0.136973
4.75433	58.8851	12.8252	-1.8618	94.3091	-0.136906
4.76267	58.9665	12.8239	-1.86091	94.2992	-0.136841
4.771	59.0481	12.8225	-1.86	94.2893	-0.136774
4.77933	59.1357	12.8212	-1.85908	94.2796	-0.136706
4.78767	59.2174	12.8198	-1.85814	94.2694	-0.136637
4.796	59.2967	12.8185	-1.8572	94.2597	-0.136568
4.80433	59.3843	12.8172	-1.85628	94.2501	-0.1365
4.81267	59.4632	12.8158	-1.85535	94.2401	-0.136432
4.821	59.5435	12.8145	-1.85441	94.2304	-0.136362
4.82933	59.6284	12.8132	-1.85343	94.2207	-0.136291
4.83767	59.711	12.8119	-1.8525	94.211	-0.136222
4.846	59.7976	12.8105	-1.85153	94.2014	-0.136151
4.85433	59.874	12.8093	-1.85059	94.1918	-0.136082
4.86267	59.9624	12.8079	-1.84966	94.182	-0.136014
4.871	60.0418	12.8066	-1.84873	94.1726	-0.135945
4.87933	60.1279	12.8053	-1.84781	94.1631	-0.135878
4.88767	60.2111	12.804	-1.84686	94.1535	-0.135807
4.896	60.296	12.8028	-1.8459	94.1442	-0.135737
4.90433	60.3769	12.8015	-1.84489	94.1347	-0.135662
4.91267	60.4644	12.8002	-1.8439	94.1252	-0.13559
4.921	60.5453	12.7989	-1.84289	94.1156	-0.135516
4.92933	60.6305	12.7976	-1.84191	94.1062	-0.135444
4.93767	60.7089	12.7963	-1.84092	94.0967	-0.135371
4.946	60.7942	12.795	-1.83993	94.0874	-0.135298
4.95433	60.8741	12.7938	-1.83893	94.078	-0.135224
4.96267	60.9642	12.7925	-1.83792	94.0687	-0.13515
4.971	61.0476	12.7913	-1.83693	94.0595	-0.135078
4.97933	61.1334	12.79	-1.83589	94.0501	-0.135001
4.98767	61.2167	12.7887	-1.83488	94.0407	-0.134927
4.996	61.3012	12.7874	-1.83388	94.0315	-0.134853
5.00433	61.3903	12.7862	-1.83287	94.0226	-0.134779
5.01267	61.4714	12.785	-1.83184	94.0132	-0.134703
5.021	61.5593	12.7837	-1.83079	94.0039	-0.134625
5.02933	61.642	12.7824	-1.82974	93.9945	-0.134549
5.03767	61.7221	12.7811	-1.8287	93.9851	-0.134472
5.046	61.8074	12.7799	-1.82765	93.9758	-0.134395
5.05433	61.8933	12.7786	-1.82659	93.9664	-0.134317
5.06267	61.979	12.7773	-1.82556	93.9572	-0.134241
5.071	62.0647	12.7761	-1.82453	93.9481	-0.134165
5.07933	62.147	12.7748	-1.82343	93.9388	-0.134084
5.08767	62.2336	12.7736	-1.82238	93.9295	-0.134007
5.096	62.3183	12.7723	-1.82133	93.9203	-0.13393
5.10433	62.4022	12.7711	-1.82029	93.9114	-0.133853
5.11267	62.4899	12.7699	-1.81923	93.9026	-0.133776
5.121	62.5707	12.7687	-1.8182	93.8939	-0.1337
5.12933	62.6558	12.7675	-1.81715	93.8849	-0.133623
5.13767	62.7426	12.7663	-1.81615	93.876	-0.133549
5.146	62.8278	12.7651	-1.81514	93.8669	-0.133475
5.15433	62.9119	12.7638	-1.81409	93.8576	-0.133398
5.16267	62.9947	12.7626	-1.81306	93.8486	-0.133322
5.171	63.0844	12.7614	-1.81198	93.8397	-0.133243
5.17933	63.1696	12.7602	-1.81093	93.8309	-0.133165
5.18767	63.2499	12.7589	-1.80987	93.8219	-0.133087
5.196	63.339	12.7577	-1.8088	93.8128	-0.133009
5.20433	63.4271	12.7565	-1.80774	93.8037	-0.132931
5.21267	63.511	12.7553	-1.80668	93.7949	-0.132852
5.221	63.5913	12.754	-1.80558	93.7859	-0.132772
5.22933	63.6797	12.7529	-1.8045	93.7773	-0.132693
5.23767	63.7663	12.7517	-1.80344	93.7688	-0.132615
5.246	63.8515	12.7505	-1.80239	93.76	-0.132537
5.25433	63.9361	12.7493	-1.80135	93.751	-0.132461
5.26267	64.0239	12.7481	-1.8003	93.742	-0.132384
5.271	64.1106	12.7469	-1.79925	93.7333	-0.132306
5.27933	64.1908	12.7457	-1.79821	93.7244	-0.13223
5.28767	64.277	12.7445	-1.79715	93.7156	-0.132152
5.296	64.3714	12.7433	-1.79608	93.7067	-0.132073
5.30433	64.4513	12.7421	-1.79501	93.6978	-0.131995
5.31267	64.535	12.7408	-1.79392	93.6888	-0.131914
5.321	64.6204	12.7396	-1.79286	93.6798	-0.131836
5.32933	64.7062	12.7384	-1.79181	93.6711	-0.13176
5.33767	64.7969	12.7373	-1.79075	93.6626	-0.131681
5.346	64.8779	12.7361	-1.78971	93.654	-0.131605
5.35433	64.966	12.7349	-1.78868	93.6452	-0.131529
5.36267	65.0527	12.7337	-1.78767	93.6363	-0.131455
5.371	65.1356	12.7325	-1.78668	93.6277	-0.131382
5.37933	65.2222	12.7314	-1.78568	93.619	-0.131309
5.38767	65.3029	12.7302	-1.78468	93.6104	-0.131235
5.396	65.3881	12.729	-1.78371	93.6015	-0.131164
5.40433	65.4731	12.7278	-1.78276	93.5927	-0.131094
5.41267	65.5579	12.7266	-1.78178	93.584	-0.131022
5.421	65.6427	12.7254	-1.7808	93.5751	-0.13095
5.42933	65.7329	12.7242	-1.77982	93.5663	-0.130878
5.43767	65.8242	12.723	-1.77881	93.5574	-0.130804
5.446	65.9071	12.7218	-1.77782	93.549	-0.130731
5.45433	65.9953	12.7206	-1.77684	93.5403	-0.130658
5.46267	66.0757	12.7194	-1.77589	93.5314	-0.130588
5.471	66.1648	12.7183	-1.77495	93.5227	-0.13052
5.47933	66.2546	12.7171	-1.77403	93.5142	-0.130452
5.48767	66.338	12.7159	-1.77306	93.5057	-0.130381
5.496	66.422	12.7148	-1.77213	93.4971	-0.130312
5.50433	66.5078	12.7136	-1.77129	93.4883	-0.130251
5.51267	66.5973	12.7124	-1.7704	93.4796	-0.130185
5.521	66.6802	12.7112	-1.76958	93.471	-0.130125
5.52933	66.772	12.71	-1.76874	93.4621	-0.130063
5.53767	66.8575	12.7088	-1.76787	93.4532	-0.129999
5.546	66.9447	12.7076	-1.76702	93.4446	-0.129937
5.55433	67.033	12.7064	-1.7662	93.4358	-0.129876
5.56267	67.1167	12.7052	-1.76539	93.4271	-0.129816
5.571	67.2024	12.7041	-1.76461	93.4182	-0.129759
5.57933	67.2865	12.7029	-1.76381	93.4095	-0.1297
5.58767	67.3697	12.7017	-1.76296	93.4008	-0.129638
5.596	67.4576	12.7005	-1.7622	93.3921	-0.129582
5.60433	67.5426	12.6993	-1.76144	93.3832	-0.129526
5.61267	67.6323	12.6981	-1.7607	93.3745	-0.129472
5.621	67.7157	12.6969	-1.75998	93.3654	-0.129419
5.62933	67.798	12.6956	-1.75927	93.3564	-0.129367
5.63767	67.8904	12.6944	-1.75857	93.3474	-0.129315
5.646	67.9741	12.6932	-1.75794	93.3387	-0.129269
5.65433	68.0597	12.692	-1.7573	93.3298	-0.129222
5.66267	68.1467	12.6908	-1.7567	93.3207	-0.129178
5.671	68.2351	12.6895	-1.75612	93.3114	-0.129135
5.67933	68.3174	12.6883	-1.75558	93.3021	-0.129095
5.68767	68.4048	12.687	-1.75502	93.2929	-0.129054
5.696	68.489	12.6858	-1.75448	93.2838	-0.129014
5.70433	68.5799	12.6845	-1.75397	93.2749	-0.128977
5.71267	68.6628	12.6833	-1.7535	93.2659	-0.128942
5.721	68.7512	12.6821	-1.75305	93.2567	-0.128909
5.72933	68.8312	12.6808	-1.75255	93.2476	-0.128872
5.73767	68.9233	12.6796	-1.7521	93.2384	-0.12884
5.746	69.0091	12.6783	-1.75171	93.2292	-0.128811
5.75433	69.097	12.6771	-1.75133	93.2201	-0.128783
5.76267	69.1808	12.6759	-1.75093	93.2111	-0.128753
5.771	69.2631	12.6747	-1.75061	93.2021	-0.12873
5.77933	69.3495	12.6735	-1.75029	93.1932	-0.128707
5.78767	69.4343	12.6722	-1.74999	93.184	-0.128684
5.796	69.525	12.6709	-1.74965	93.1748	-0.128659
5.80433	69.6098	12.6697	-1.74937	93.1656	-0.128638
5.81267	69.6917	12.6684	-1.74914	93.1562	-0.128622
5.821	69.7833	12.6671	-1.74894	93.1468	-0.128607
5.82933	69.87	12.6659	-1.74873	93.1374	-0.128592
5.83767	69.9545	12.6646	-1.74856	93.1282	-0.128579
5.846	70.0356	12.6633	-1.74839	93.119	-0.128567
5.85433	70.1255	12.6621	-1.74822	93.1096	-0.128554
5.86267	70.2123	12.6608	-1.7481	93.0999	-0.128545
5.871	70.298	12.6595	-1.74803	93.0904	-0.12854
5.87933	70.3796	12.6582	-1.74798	93.081	-0.128537
5.88767	70.4716	12.6569	-1.74792	93.0714	-0.128532
5.896	70.5522	12.6556	-1.74786	93.062	-0.128527
5.90433	70.6397	12.6543	-1.74781	93.0526	-0.128524
5.91267	70.7235	12.653	-1.74777	93.043	-0.128521
5.921	70.81	12.6517	-1.74777	93.0334	-0.128521
5.92933	70.8928	12.6504	-1.74779	93.0236	-0.128522
5.93767	70.9777	12.6491	-1.74784	93.0138	-0.128526
5.946	71.0662	12.6478	-1.74794	93.0042	-0.128534
5.95433	71.1503	12.6464	-1.74802	92.9946	-0.128539
5.96267	71.2337	12.6451	-1.74812	92.985	-0.128547
5.971	71.3222	12.6438	-1.74825	92.9753	-0.128556
5.97933	71.4035	12.6425	-1.74839	92.9657	-0.128567
5.98767	71.4928	12.6412	-1.74855	92.9561	-0.128578
5.996	71.574	12.6399	-1.74871	92.9464	-0.12859
6.00433	71.6633	12.6386	-1.7489	92.9369	-0.128604
6.01267	71.7465	12.6373	-1.74914	92.9272	-0.128621
6.021	71.8311	12.636	-1.74938	92.9177	-0.12864
6.02933	71.9206	12.6347	-1.74959	92.908	-0.128655
6.03767	72.0002	12.6333	-1.74981	92.8982	-0.128671
6.046	72.0887	12.632	-1.75008	92.8883	-0.128691
6.05433	72.1741	12.6307	-1.75037	92.8786	-0.128712
6.06267	72.2575	12.6293	-1.75068	92.8685	-0.128735
6.071	72.3417	12.628	-1.751	92.8587	-0.128759
6.07933	72.4316	12.6266	-1.75135	92.8487	-0.128784
6.08767	72.5108	12.6252	-1.75172	92.8387	-0.128811
6.096	72.5992	12.6239	-1.75208	92.8289	-0.128837
6.10433	72.6814	12.6225	-1.75242	92.8189	-0.128862
6.11267	72.7683	12.6212	-1.7528	92.809	-0.12889
6.121	72.8506	12.6199	-1.75321	92.7992	-0.128921
6.12933	72.9395	12.6185	-1.75363	92.7892	-0.128952
6.13767	73.0244	12.6171	-1.75406	92.7791	-0.128983
6.146	73.1108	12.6158	-1.75449	92.7692	-0.129015
6.15433	73.1979	12.6144	-1.75492	92.7589	-0.129047
6.16267	73.2829	12.613	-1.75536	92.7488	-0.129079
6.171	73.3614	12.6116	-1.75583	92.7384	-0.129114
6.17933	73.4461	12.6102	-1.7563	92.7283	-0.129148
6.18767	73.5284	12.6088	-1.75676	92.718	-0.129182
6.196	73.6187	12.6074	-1.75723	92.7075	-0.129217
6.20433	73.7017	12.606	-1.75772	92.6972	-0.129253
6.21267	73.7873	12.6046	-1.75817	92.687	-0.129286
6.221	73.8725	12.6032	-1.75866	92.6769	-0.129321
6.22933	73.9622	12.6018	-1.75917	92.6667	-0.129359
6.23767	74.0389	12.6004	-1.75969	92.6564	-0.129398
6.246	74.1218	12.5991	-1.76023	92.6463	-0.129437
6.25433	74.2079	12.5977	-1.76074	92.6361	-0.129475
6.26267	74.2939	12.5962	-1.76127	92.6255	-0.129514
6.271	74.3806	12.5948	-1.76186	92.615	-0.129557
6.27933	74.4651	12.5934	-1.76244	92.6047	-0.1296
6.28767	74.5484	12.592	-1.76303	92.5944	-0.129643
6.296	74.6308	12.5906	-1.76366	92.584	-0.129689
6.30433	74.7171	12.5892	-1.76429	92.5734	-0.129736
6.31267	74.803	12.5877	-1.76491	92.5627	-0.129782
6.321	74.8838	12.5863	-1.7655	92.5523	-0.129825
6.32933	74.9708	12.5849	-1.76613	92.5418	-0.129871
6.33767	75.0572	12.5834	-1.76679	92.5311	-0.129919
6.346	75.1445	12.582	-1.76743	92.5208	-0.129967
6.35433	75.2238	12.5806	-1.76804	92.5104	-0.130011
6.36267	75.3086	12.5792	-1.76867	92.5001	-0.130058
6.371	75.3908	12.5777	-1.76931	92.4894	-0.130105
6.37933	75.4714	12.5763	-1.76994	92.4787	-0.130151
6.38767	75.5553	12.5748	-1.77056	92.4681	-0.130197
6.396	75.6434	12.5734	-1.77119	92.4577	-0.130243
6.40433	75.7225	12.572	-1.77187	92.447	-0.130293
6.41267	75.8077	12.5705	-1.77251	92.4365	-0.13034
6.421	75.8939	12.5691	-1.77314	92.4261	-0.130386
6.42933	75.9776	12.5677	-1.77378	92.4157	-0.130433
6.43767	76.0584	12.5663	-1.77447	92.4052	-0.130484
6.446	76.1502	12.5648	-1.77513	92.3944	-0.130533
6.45433	76.2325	12.5634	-1.77579	92.3838	-0.130581
6.46267	76.3151	12.5619	-1.77648	92.3733	-0.130632
6.471	76.3983	12.5605	-1.77716	92.3628	-0.130682
6.47933	76.4829	12.5591	-1.77785	92.3522	-0.130733
6.48767	76.5706	12.5576	-1.77852	92.3416	-0.130782
6.496	76.6507	12.5562	-1.77921	92.331	-0.130833
6.50433	76.7341	12.5547	-1.77991	92.3203	-0.130884
6.51267	76.8169	12.5533	-1.78061	92.3096	-0.130936
6.521	76.9011	12.5518	-1.78129	92.2988	-0.130986
6.52933	76.9844	12.5504	-1.78199	92.2882	-0.131037
6.53767	77.0715	12.5489	-1.78272	92.2775	-0.131091
6.546	77.1498	12.5474	-1.78346	92.2666	-0.131145
6.55433	77.2346	12.5459	-1.78415	92.2557	-0.131196
6.56267	77.3174	12.5445	-1.78489	92.2449	-0.13125
6.571	77.4002	12.543	-1.78562	92.2339	-0.131304
6.57933	77.4843	12.5415	-1.78639	92.223	-0.131361
6.58767	77.568	12.54	-1.78715	92.2119	-0.131417
6.596	77.6513	12.5385	-1.78792	92.2008	-0.131473
6.60433	77.7378	12.537	-1.78875	92.1899	-0.131534
6.61267	77.8203	12.5355	-1.78954	92.1788	-0.131592
6.621	77.9072	12.534	-1.79029	92.1677	-0.131648
6.62933	77.9873	12.5325	-1.79109	92.1568	-0.131707
6.63767	78.0674	12.531	-1.79192	92.1459	-0.131767
6.646	78.1511	12.5295	-1.7927	92.1348	-0.131825
6.65433	78.2376	12.528	-1.7935	92.1239	-0.131884
6.66267	78.3228	12.5265	-1.79427	92.1129	-0.13194
6.671	78.4009	12.5251	-1.79501	92.102	-0.131994
6.67933	78.4836	12.5236	-1.79578	92.091	-0.132051
6.68767	78.5678	12.5221	-1.79652	92.0801	-0.132106
6.696	78.654	12.5206	-1.79731	92.0693	-0.132164
6.70433	78.7316	12.5191	-1.79813	92.0584	-0.132224
6.71267	78.8205	12.5176	-1.79889	92.0476	-0.13228
6.721	78.9019	12.5162	-1.79966	92.0366	-0.132336
6.72933	78.9812	12.5147	-1.80047	92.0258	-0.132396
6.73767	79.0659	12.5132	-1.80128	92.0147	-0.132456
6.746	79.1494	12.5117	-1.80211	92.0037	-0.132517
6.75433	79.2344	12.5102	-1.80296	91.9927	-0.132579
6.76267	79.3174	12.5087	-1.80378	91.9816	-0.13264
6.771	79.399	12.5072	-1.80463	91.9705	-0.132702
6.77933	79.4853	12.5056	-1.80546	91.9593	-0.132763
6.78767	79.5685	12.5041	-1.80625	91.9481	-0.132821
6.796	79.6491	12.5026	-1.80708	91.9368	-0.132883
6.80433	79.7348	12.5011	-1.80791	91.9258	-0.132943
6.81267	79.8153	12.4996	-1.80875	91.9147	-0.133005
6.821	79.9048	12.4981	-1.8096	91.9036	-0.133068
6.82933	79.9856	12.4965	-1.81043	91.8923	-0.133128
6.83767	80.0682	12.495	-1.81128	91.8809	-0.133191
6.846	80.1518	12.4934	-1.81215	91.8695	-0.133255
6.85433	80.2336	12.4919	-1.81297	91.8581	-0.133315
6.86267	80.3146	12.4903	-1.8138	91.8467	-0.133376
6.871	80.3999	12.4888	-1.81466	91.8356	-0.133439
6.87933	80.4791	12.4873	-1.81552	91.8245	-0.133503
6.88767	80.5667	12.4858	-1.81639	91.8131	-0.133567
6.896	80.6443	12.4842	-1.81724	91.8014	-0.133629
6.90433	80.7336	12.4826	-1.81806	91.79	-0.133689
6.91267	80.8088	12.4811	-1.81893	91.7787	-0.133753
6.921	80.8973	12.4795	-1.81981	91.7674	-0.133818
6.92933	80.9809	12.478	-1.82065	91.7563	-0.13388
6.93767	81.0602	12.4765	-1.8215	91.745	-0.133943
6.946	81.1423	12.475	-1.82234	91.7337	-0.134004
6.95433	81.2228	12.4734	-1.82319	91.7223	-0.134067
6.96267	81.3077	12.4719	-1.824	91.7109	-0.134127
6.971	81.3962	12.4703	-1.82482	91.6997	-0.134187
6.97933	81.4735	12.4688	-1.82567	91.6884	-0.134249
6.98767	81.5547	12.4673	-1.82654	91.6772	-0.134313
6.996	81.6428	12.4658	-1.8274	91.6661	-0.134376
7.00433	81.7258	12.4642	-1.82821	91.6547	-0.134436
7.01267	81.8079	12.4627	-1.82901	91.6434	-0.134495
7.021	81.8858	12.4611	-1.82981	91.6321	-0.134554
7.02933	81.9747	12.4596	-1.83063	91.6209	-0.134614
7.03767	82.0551	12.4581	-1.83142	91.6095	-0.134672
7.046	82.1338	12.4565	-1.83222	91.5979	-0.134731
7.05433	82.2238	12.455	-1.83304	91.5865	-0.134791
7.06267	82.306	12.4534	-1.83383	91.575	-0.134849
7.071	82.3884	12.4518	-1.83461	91.5636	-0.134907
7.07933	82.4703	12.4503	-1.83536	91.5522	-0.134962
7.08767	82.5499	12.4487	-1.83615	91.5408	-0.13502
7.096	82.632	12.4472	-1.8369	91.5292	-0.135075
7.10433	82.7165	12.4456	-1.83769	91.5177	-0.135133
7.11267	82.7967	12.444	-1.83846	91.5061	-0.13519
7.121	82.8771	12.4425	-1.83923	91.4947	-0.135246
7.12933	82.9634	12.4409	-1.83999	91.4833	-0.135302
7.13767	83.0452	12.4394	-1.84072	91.4719	-0.135356
7.146	83.1287	12.4378	-1.84144	91.4605	-0.135409
7.15433	83.2116	12.4363	-1.84214	91.4491	-0.13546
7.16267	83.2934	12.4347	-1.84286	91.4375	-0.135513
7.171	83.3815	12.4331	-1.84354	91.4261	-0.135563
7.17933	83.4583	12.4316	-1.84422	91.4147	-0.135613
7.18767	83.5413	12.43	-1.84486	91.4033	-0.135661
7.196	83.6225	12.4285	-1.84553	91.3919	-0.13571
7.20433	83.7062	12.427	-1.8462	91.3807	-0.135759
7.21267	83.7882	12.4254	-1.84686	91.3692	-0.135807
7.221	83.8665	12.4238	-1.84749	91.3578	-0.135854
7.22933	83.9494	12.4223	-1.8481	91.3463	-0.135899
7.23767	84.0345	12.4207	-1.84872	91.3349	-0.135944
7.246	84.1193	12.4192	-1.8493	91.3237	-0.135987
7.25433	84.2041	12.4177	-1.84988	91.3124	-0.136029
7.26267	84.2814	12.4161	-1.85047	91.301	-0.136073
7.271	84.3695	12.4146	-1.85106	91.2898	-0.136117
7.27933	84.451	12.4131	-1.85159	91.2785	-0.136156
7.28767	84.5328	12.4115	-1.85214	91.267	-0.136196
7.296	84.6155	12.41	-1.85264	91.2557	-0.136233
7.30433	84.7013	12.4084	-1.85315	91.2442	-0.13627
7.31267	84.7803	12.4069	-1.85363	91.2329	-0.136305
7.321	84.863	12.4053	-1.85409	91.2216	-0.136339
7.32933	84.9437	12.4038	-1.85453	91.2104	-0.136372
7.33767	85.0313	12.4023	-1.85501	91.1992	-0.136406
7.346	85.1134	12.4008	-1.85541	91.188	-0.136436
7.35433	85.1959	12.3992	-1.8558	91.1766	-0.136465
7.36267	85.2808	12.3977	-1.85617	91.1655	-0.136492
7.371	85.3541	12.3962	-1.8565	91.1543	-0.136516
7.37933	85.4407	12.3947	-1.85682	91.1432	-0.13654
7.38767	85.5275	12.3932	-1.85712	91.1321	-0.136562
7.396	85.6136	12.3916	-1.85738	91.121	-0.136581
7.40433	85.6944	12.3901	-1.85762	91.1099	-0.136599
7.41267	85.7734	12.3886	-1.85785	91.0989	-0.136616
7.421	85.8552	12.3871	-1.85802	91.0877	-0.136628
7.42933	85.9362	12.3856	-1.85819	91.0768	-0.136641
7.43767	86.0203	12.3841	-1.85834	91.0659	-0.136651
7.446	86.1068	12.3827	-1.8585	91.0549	-0.136663
7.45433	86.1876	12.3812	-1.85861	91.044	-0.136671
7.46267	86.2695	12.3797	-1.85869	91.0331	-0.136678
7.471	86.3598	12.3782	-1.85878	91.0224	-0.136684
7.47933	86.4367	12.3768	-1.85887	91.0118	-0.13669
7.48767	86.5216	12.3753	-1.85891	91.001	-0.136694
7.496	86.6031	12.3738	-1.85893	90.99	-0.136695
7.50433	86.6859	12.3724	-1.85894	90.9793	-0.136696
7.51267	86.7711	12.3709	-1.85893	90.9686	-0.136695
7.521	86.8512	12.3695	-1.85886	90.9579	-0.13669
7.52933	86.9352	12.368	-1.85875	90.9473	-0.136682
7.53767	87.0183	12.3666	-1.85862	90.9368	-0.136672
7.546	87.0993	12.3652	-1.85843	90.9264	-0.136658
7.55433	87.1849	12.3637	-1.8582	90.9158	-0.136641
7.56267	87.2688	12.3623	-1.85796	90.9052	-0.136623
7.571	87.3456	12.3609	-1.8577	90.8948	-0.136604
7.57933	87.4321	12.3595	-1.85739	90.8843	-0.136582
7.58767	87.5163	12.358	-1.85705	90.8737	-0.136557
7.596	87.5951	12.3566	-1.85667	90.8633	-0.136529
7.60433	87.6863	12.3552	-1.85626	90.8529	-0.136499
7.61267	87.7674	12.3538	-1.85583	90.8424	-0.136467
7.621	87.8464	12.3523	-1.85534	90.832	-0.136431
7.62933	87.9336	12.3509	-1.85483	90.8214	-0.136394
7.63767	88.0133	12.3495	-1.8543	90.8112	-0.136355
7.646	88.1023	12.3481	-1.85377	90.8009	-0.136315
7.65433	88.187	12.3468	-1.85319	90.7909	-0.136273
7.66267	88.2701	12.3454	-1.85258	90.7809	-0.136228
7.671	88.3549	12.3441	-1.8519	90.7711	-0.136178
7.67933	88.443	12.3427	-1.85119	90.7612	-0.136126
7.68767	88.5246	12.3414	-1.8505	90.7512	-0.136075
7.696	88.6076	12.34	-1.84973	90.7414	-0.136019
7.70433	88.6883	12.3387	-1.84897	90.7315	-0.135963
7.71267	88.7747	12.3374	-1.84819	90.722	-0.135905
7.721	88.861	12.336	-1.84735	90.7121	-0.135843
7.72933	88.9395	12.3347	-1.84645	90.7023	-0.135777
7.73767	89.0244	12.3333	-1.84553	90.6923	-0.135709
7.746	89.1129	12.332	-1.84459	90.6826	-0.13564
7.75433	89.1911	12.3307	-1.8436	90.6729	-0.135568
7.76267	89.2773	12.3294	-1.8426	90.6634	-0.135494
7.771	89.3623	12.3281	-1.84155	90.6538	-0.135417
7.77933	89.4414	12.3268	-1.84052	90.6445	-0.135341
7.78767	89.5278	12.3256	-1.83943	90.635	-0.135261
7.796	89.6152	12.3243	-1.83832	90.6256	-0.135179
7.80433	89.699	12.323	-1.83718	90.6164	-0.135096
7.81267	89.7771	12.3218	-1.836	90.6073	-0.135009
7.821	89.8631	12.3206	-1.83481	90.5984	-0.134921
7.82933	89.946	12.3193	-1.83357	90.589	-0.13483
7.83767	90.0336	12.318	-1.83234	90.5798	-0.13474
7.846	90.1172	12.3168	-1.83109	90.5707	-0.134648
7.85433	90.1993	12.3156	-1.82978	90.5617	-0.134552
7.86267	90.2859	12.3143	-1.82842	90.5525	-0.134451
7.871	90.3695	12.3131	-1.82706	90.5434	-0.134352
7.87933	90.4569	12.3119	-1.82567	90.5345	-0.134249
7.88767	90.5369	12.3107	-1.82424	90.5257	-0.134144
7.896	90.6238	12.3094	-1.82278	90.5165	-0.134037
7.90433	90.7114	12.3082	-1.82126	90.5075	-0.133925
7.91267	90.7885	12.307	-1.81974	90.4987	-0.133813
7.921	90.8722	12.3058	-1.8182	90.49	-0.1337
7.92933	90.9619	12.3047	-1.81662	90.4813	-0.133584
7.93767	91.0453	12.3035	-1.81505	90.4727	-0.133468
7.946	91.1335	12.3023	-1.81346	90.4642	-0.133351
7.95433	91.2143	12.3012	-1.81182	90.4556	-0.133231
7.96267	91.3021	12.3	-1.8102	90.4469	-0.133112
7.971	91.3879	12.2988	-1.80855	90.4385	-0.132991
7.97933	91.4728	12.2977	-1.80689	90.4304	-0.132868
7.98767	91.5585	12.2966	-1.8052	90.422	-0.132744
7.996	91.6418	12.2955	-1.80353	90.4137	-0.132621
8.00433	91.7253	12.2943	-1.80183	90.4053	-0.132496
8.01267	91.8135	12.2932	-1.80009	90.3969	-0.132368
8.021	91.8964	12.2921	-1.79832	90.3887	-0.132238
8.02933	91.9813	12.2909	-1.79655	90.3803	-0.132108
8.03767	92.0637	12.2898	-1.79478	90.3722	-0.131977
8.046	92.1501	12.2887	-1.79295	90.3641	-0.131843
8.05433	92.2327	12.2876	-1.79117	90.3558	-0.131712
8.06267	92.3178	12.2865	-1.78936	90.3475	-0.131579
8.071	92.4063	12.2853	-1.78756	90.3393	-0.131447
8.07933	92.4891	12.2842	-1.78567	90.3311	-0.131308
8.08767	92.572	12.2831	-1.7838	90.323	-0.13117
8.096	92.6573	12.282	-1.78197	90.3149	-0.131036
8.10433	92.7461	12.2809	-1.78012	90.3069	-0.130899
8.11267	92.8334	12.2799	-1.77821	90.299	-0.130759
8.121	92.9111	12.2788	-1.77629	90.2911	-0.130618
8.12933	92.9963	12.2777	-1.77439	90.2829	-0.130479
8.13767	93.0837	12.2766	-1.77245	90.2751	-0.130335
8.146	93.1693	12.2755	-1.77051	90.2672	-0.130193
8.15433	93.2518	12.2745	-1.76856	90.2594	-0.13005
8.16267	93.3352	12.2734	-1.76661	90.2518	-0.129906
8.171	93.4234	12.2724	-1.76465	90.244	-0.129762
8.17933	93.5089	12.2713	-1.76268	90.2363	-0.129618
8.18767	93.5937	12.2703	-1.76073	90.2286	-0.129474
8.196	93.6787	12.2692	-1.75878	90.2208	-0.129331
8.20433	93.7641	12.2681	-1.75683	90.2128	-0.129187
8.21267	93.8492	12.2671	-1.75486	90.2054	-0.129042
8.221	93.9318	12.2661	-1.75288	90.1977	-0.128897
8.22933	94.0179	12.265	-1.75088	90.1898	-0.12875
8.23767	94.0999	12.264	-1.74889	90.1821	-0.128603
8.246	94.1871	12.2629	-1.7469	90.1744	-0.128457
8.25433	94.2704	12.2619	-1.74489	90.1669	-0.128309
8.26267	94.3574	12.2608	-1.74288	90.1591	-0.128161
8.271	94.4412	12.2598	-1.74083	90.1515	-0.128011
8.27933	94.5252	12.2588	-1.73883	90.1439	-0.127864
8.28767	94.6145	12.2578	-1.73678	90.1366	-0.127713
8.296	94.6967	12.2568	-1.73474	90.1291	-0.127563
8.30433	94.7859	12.2557	-1.73272	90.1216	-0.127414
8.31267	94.87	12.2548	-1.73071	90.1144	-0.127267
8.321	94.9526	12.2537	-1.7287	90.1069	-0.127119
8.32933	95.0325	12.2527	-1.72668	90.0995	-0.12697
8.33767	95.1221	12.2517	-1.72466	90.0919	-0.126821
8.346	95.2076	12.2507	-1.72261	90.0847	-0.126671
8.35433	95.2981	12.2498	-1.72058	90.0777	-0.126522
8.36267	95.3779	12.2488	-1.71856	90.0703	-0.126373
8.371	95.4635	12.2478	-1.71655	90.063	-0.126225
8.37933	95.5427	12.2468	-1.71453	90.0557	-0.126077
8.38767	95.6371	12.2458	-1.71249	90.0486	-0.125926
8.396	95.7247	12.2448	-1.71047	90.0415	-0.125778
8.40433	95.8073	12.2439	-1.70843	90.0343	-0.125628
8.41267	95.8954	12.2429	-1.70643	90.0271	-0.125481
8.421	95.9775	12.2419	-1.70441	90.0198	-0.125332
8.42933	96.0643	12.2409	-1.70239	90.0124	-0.125184
8.43767	96.1434	12.2399	-1.70041	90.0049	-0.125038
8.446	96.2333	12.2389	-1.69838	89.9977	-0.124889
8.45433	96.3166	12.2379	-1.69639	89.9905	-0.124743
8.46267	96.4102	12.2369	-1.69437	89.9833	-0.124595
8.471	96.4943	12.236	-1.69237	89.9762	-0.124447
8.47933	96.579	12.235	-1.69035	89.969	-0.124298
8.48767	96.6617	12.234	-1.68837	89.9617	-0.124153
8.496	96.7472	12.233	-1.68637	89.9546	-0.124006
8.50433	96.8361	12.2321	-1.68436	89.9477	-0.123858
8.51267	96.9141	12.2311	-1.68237	89.9406	-0.123712
8.521	96.9988	12.2302	-1.68039	89.9336	-0.123566
8.52933	97.0886	12.2292	-1.6784	89.9264	-0.12342
8.53767	97.1716	12.2282	-1.67638	89.9193	-0.123272
8.546	97.251	12.2272	-1.67442	89.9121	-0.123127
8.55433	97.3398	12.2263	-1.67245	89.9049	-0.122982
8.56267	97.4273	12.2253	-1.6705	89.8979	-0.122839
8.571	97.514	12.2244	-1.66852	89.891	-0.122693
8.57933	97.5942	12.2234	-1.66654	89.8841	-0.122548
8.58767	97.6805	12.2225	-1.66459	89.8774	-0.122404
8.596	97.7673	12.2216	-1.66263	89.8707	-0.122261
8.60433	97.8528	12.2207	-1.66065	89.8638	-0.122115
8.61267	97.937	12.2197	-1.65873	89.8568	-0.121973
8.621	98.0213	12.2188	-1.65681	89.8498	-0.121833
8.62933	98.1046	12.2179	-1.65488	89.8432	-0.12169
8.63767	98.194	12.217	-1.65295	89.8365	-0.121548
8.646	98.2781	12.216	-1.65101	89.8296	-0.121405
8.65433	98.3628	12.2151	-1.64908	89.8229	-0.121263
8.66267	98.4487	12.2142	-1.64716	89.8162	-0.121122
8.671	98.5373	12.2133	-1.64527	89.8093	-0.120984
8.67933	98.618	12.2123	-1.64338	89.8025	-0.120845
8.68767	98.7107	12.2114	-1.64151	89.7958	-0.120707
8.696	98.7892	12.2106	-1.63959	89.7894	-0.120566
8.70433	98.8742	12.2097	-1.63767	89.7828	-0.120424
8.71267	98.9609	12.2087	-1.63575	89.7757	-0.120284
8.721	99.0429	12.2078	-1.63389	89.769	-0.120147
8.72933	99.1345	12.2069	-1.63199	89.7622	-0.120007
8.73767	99.2187	12.2059	-1.63012	89.7554	-0.11987
8.746	99.3044	12.205	-1.62825	89.7487	-0.119732
8.75433	99.3848	12.2041	-1.62638	89.7422	-0.119594
8.76267	99.469	12.2033	-1.62452	89.7357	-0.119458
8.771	99.5551	12.2023	-1.62267	89.729	-0.119321
8.77933	99.6431	12.2014	-1.62086	89.7223	-0.119188
8.78767	99.7246	12.2005	-1.61906	89.7155	-0.119056
8.796	99.8142	12.1997	-1.61726	89.7093	-0.118924
8.80433	99.8998	12.1988	-1.61544	89.7028	-0.11879
8.81267	99.9861	12.1979	-1.61366	89.6965	-0.118659
8.821	100.074	12.1971	-1.6119	89.6901	-0.11853
8.82933	100.157	12.1962	-1.61012	89.6837	-0.118399
8.83767	100.242	12.1953	-1.60834	89.6769	-0.118268
8.846	100.328	12.1944	-1.60655	89.6703	-0.118136
8.85433	100.409	12.1935	-1.60477	89.6637	-0.118005
8.86267	100.495	12.1926	-1.60296	89.657	-0.117873
8.871	100.582	12.1917	-1.60115	89.6506	-0.117739
8.87933	100.669	12.1908	-1.59936	89.6439	-0.117608
8.88767	100.752	12.1898	-1.59762	89.6371	-0.117479
8.896	100.836	12.1889	-1.59588	89.6303	-0.117352
8.90433	100.926	12.188	-1.59414	89.6234	-0.117224
8.91267	101.007	12.1871	-1.59239	89.6169	-0.117095
8.921	101.093	12.1862	-1.59065	89.6106	-0.116967
8.92933	101.178	12.1854	-1.58891	89.6043	-0.116839
8.93767	101.265	12.1845	-1.58721	89.5979	-0.116714
8.946	101.35	12.1837	-1.58553	89.5919	-0.116591
8.95433	101.434	12.1829	-1.58386	89.5857	-0.116468
8.96267	101.521	12.182	-1.58218	89.5794	-0.116344
8.971	101.608	12.1811	-1.58045	89.5729	-0.116217
8.97933	101.694	12.1803	-1.57874	89.5666	-0.116091
8.98767	101.775	12.1794	-1.57702	89.5603	-0.115965
8.996	101.862	12.1785	-1.57535	89.5537	-0.115842
9.00433	101.948	12.1776	-1.57367	89.5472	-0.115718
9.01267	102.035	12.1767	-1.57203	89.5406	-0.115598
9.021	102.118	12.1759	-1.57035	89.5342	-0.115475
9.02933	102.203	12.175	-1.56868	89.5278	-0.115351
9.03767	102.29	12.1741	-1.56703	89.5213	-0.11523
9.046	102.371	12.1733	-1.56537	89.5151	-0.115108
9.05433	102.458	12.1724	-1.56374	89.509	-0.114989
9.06267	102.545	12.1716	-1.56209	89.5029	-0.114867
9.071	102.629	12.1708	-1.56046	89.4967	-0.114747
9.07933	102.715	12.1699	-1.55883	89.4904	-0.114627
9.08767	102.802	12.1691	-1.55717	89.4842	-0.114506
9.096	102.886	12.1682	-1.55551	89.4781	-0.114384
9.10433	102.975	12.1674	-1.55387	89.4719	-0.114263
9.11267	103.057	12.1665	-1.55222	89.4655	-0.114142
9.121	103.137	12.1657	-1.55059	89.4592	-0.114021
9.12933	103.222	12.1648	-1.549	89.453	-0.113904
9.13767	103.31	12.164	-1.5474	89.4467	-0.113787
9.146	103.397	12.1631	-1.54581	89.4404	-0.11367
9.15433	103.479	12.1622	-1.54421	89.4341	-0.113552
9.16267	103.567	12.1614	-1.54262	89.4281	-0.113435
9.171	103.65	12.1606	-1.54106	89.4219	-0.113321
9.17933	103.737	12.1597	-1.53948	89.4157	-0.113204
9.18767	103.827	12.1589	-1.5379	89.4096	-0.113088
9.196	103.908	12.1581	-1.53635	89.4036	-0.112974
9.20433	103.993	12.1573	-1.5348	89.3975	-0.11286
9.21267	104.081	12.1564	-1.53321	89.3915	-0.112744
9.221	104.16	12.1556	-1.53165	89.3854	-0.112629
9.22933	104.251	12.1548	-1.53005	89.3793	-0.112511
9.23767	104.336	12.154	-1.52846	89.3733	-0.112394
9.246	104.422	12.1532	-1.52686	89.3673	-0.112276
9.25433	104.509	12.1524	-1.52532	89.3614	-0.112163
9.26267	104.592	12.1515	-1.52378	89.3553	-0.11205
9.271	104.676	12.1507	-1.52225	89.3492	-0.111937
9.27933	104.765	12.1499	-1.52073	89.3431	-0.111826
9.28767	104.848	12.1491	-1.51918	89.3372	-0.111712
9.296	104.933	12.1482	-1.51766	89.3308	-0.1116
9.30433	105.015	12.1473	-1.51612	89.3246	-0.111487
9.31267	105.103	12.1465	-1.51462	89.3187	-0.111377
9.321	105.188	12.1457	-1.51317	89.3126	-0.11127
9.32933	105.277	12.1449	-1.5117	89.3067	-0.111162
9.33767	105.359	12.1441	-1.51019	89.3006	-0.111051
9.346	105.444	12.1433	-1.50871	89.2946	-0.110942
9.35433	105.532	12.1424	-1.50721	89.2884	-0.110831
9.36267	105.617	12.1416	-1.5057	89.2825	-0.110721
9.371	105.697	12.1408	-1.50422	89.2766	-0.110612
9.37933	105.787	12.1401	-1.50276	89.2709	-0.110504
9.38767	105.872	12.1393	-1.50131	89.265	-0.110398
9.396	105.951	12.1384	-1.49988	89.259	-0.110293
9.40433	106.041	12.1376	-1.49843	89.253	-0.110186
9.41267	106.124	12.1368	-1.49697	89.2469	-0.110079
9.421	106.216	12.136	-1.49551	89.241	-0.109971
9.42933	106.298	12.1352	-1.49405	89.2351	-0.109864
9.43767	106.38	12.1344	-1.4926	89.2293	-0.109758
9.446	106.466	12.1336	-1.49114	89.2234	-0.10965
9.45433	106.549	12.1328	-1.48973	89.2176	-0.109546
9.46267	106.635	12.132	-1.48832	89.2116	-0.109443
9.471	106.721	12.1312	-1.48689	89.2058	-0.109337
9.47933	106.805	12.1304	-1.48545	89.2002	-0.109231
9.48767	106.889	12.1297	-1.48401	89.1945	-0.109125
9.496	106.971	12.1288	-1.48257	89.1886	-0.10902
9.50433	107.064	12.1281	-1.48117	89.1828	-0.108917
9.51267	107.144	12.1273	-1.47976	89.177	-0.108813
9.521	107.233	12.1265	-1.47836	89.1714	-0.10871
9.52933	107.317	12.1257	-1.47695	89.1654	-0.108607
9.53767	107.405	12.1249	-1.47553	89.1593	-0.108502
9.546	107.494	12.1241	-1.47411	89.1536	-0.108397
9.55433	107.574	12.1233	-1.47271	89.1478	-0.108294
9.56267	107.659	12.1225	-1.47129	89.142	-0.10819
9.571	107.741	12.1217	-1.46991	89.136	-0.108088
9.57933	107.83	12.1209	-1.4685	89.13	-0.107985
9.58767	107.917	12.1201	-1.46709	89.1241	-0.107881
9.596	108	12.1193	-1.4657	89.1183	-0.107779
9.60433	108.084	12.1185	-1.46433	89.1125	-0.107679
9.61267	108.169	12.1177	-1.46298	89.1068	-0.107579
9.621	108.258	12.117	-1.46163	89.1011	-0.10748
9.62933	108.338	12.1162	-1.46024	89.0953	-0.107378
9.63767	108.424	12.1154	-1.4589	89.0896	-0.107279
9.646	108.509	12.1146	-1.45757	89.0838	-0.107181
9.65433	108.591	12.1139	-1.45621	89.0783	-0.107081
9.66267	108.678	12.1131	-1.45493	89.0727	-0.106987
9.671	108.758	12.1123	-1.45365	89.0671	-0.106893
9.67933	108.844	12.1116	-1.45233	89.0616	-0.106796
9.68767	108.932	12.1108	-1.45102	89.0558	-0.1067
9.696	109.016	12.11	-1.44971	89.0501	-0.106604
9.70433	109.103	12.1093	-1.4484	89.0446	-0.106507
9.71267	109.192	12.1085	-1.44711	89.039	-0.106412
9.721	109.273	12.1077	-1.44579	89.0333	-0.106315
9.72933	109.36	12.1069	-1.44446	89.0275	-0.106217
9.73767	109.445	12.1062	-1.44313	89.022	-0.106119
9.746	109.531	12.1055	-1.44174	89.0166	-0.106017
9.75433	109.618	12.1047	-1.44039	89.011	-0.105918
9.76267	109.7	12.1039	-1.43909	89.0053	-0.105822
9.771	109.788	12.1032	-1.43776	88.9996	-0.105725
9.77933	109.874	12.1024	-1.43646	88.9942	-0.105629
9.78767	109.958	12.1017	-1.43517	88.9886	-0.105534
9.796	110.037	12.1009	-1.43387	88.983	-0.105439
9.80433	110.128	12.1001	-1.43257	88.9774	-0.105343
9.81267	110.213	12.0994	-1.43127	88.9719	-0.105247
9.821	110.299	12.0986	-1.42998	88.9663	-0.105152
9.82933	110.383	12.0979	-1.42873	88.9607	-0.105061
9.83767	110.466	12.0971	-1.42745	88.9552	-0.104967
9.846	110.555	12.0964	-1.42617	88.9496	-0.104872
9.85433	110.635	12.0956	-1.42491	88.9444	-0.104779
9.86267	110.719	12.0949	-1.42363	88.9389	-0.104685
9.871	110.805	12.0942	-1.42229	88.9334	-0.104587
9.87933	110.888	12.0934	-1.42101	88.928	-0.104493
9.88767	110.974	12.0927	-1.41974	88.9226	-0.104399
9.896	111.059	12.0919	-1.4185	88.917	-0.104309
9.90433	111.147	12.0912	-1.41728	88.9115	-0.104219
9.91267	111.231	12.0905	-1.41603	88.9062	-0.104127
9.921	111.316	12.0897	-1.41478	88.9005	-0.104035
9.92933	111.405	12.0889	-1.41355	88.8951	-0.103944
9.93767	111.483	12.0882	-1.41229	88.8896	-0.103852
9.946	111.568	12.0874	-1.41106	88.884	-0.103761
9.95433	111.656	12.0867	-1.40986	88.8785	-0.103673
9.96267	111.741	12.086	-1.40864	88.8731	-0.103583
9.971	111.826	12.0852	-1.40741	88.8678	-0.103493
9.97933	111.913	12.0845	-1.40616	88.8625	-0.103401
9.98767	112.001	12.0838	-1.40492	88.8571	-0.10331
9.996	112.08	12.083	-1.40371	88.8516	-0.103221
10.0043	112.163	12.0823	-1.40249	88.8464	-0.103131
10.0127	112.25	12.0816	-1.40128	88.8412	-0.103042
10.021	112.332	12.0809	-1.40011	88.8358	-0.102956
10.0293	112.418	12.0802	-1.3989	88.8305	-0.102867
10.0377	112.506	12.0794	-1.39769	88.8252	-0.102778
10.046	112.593	12.0787	-1.3965	88.8199	-0.102691
10.0543	112.674	12.078	-1.39536	88.8146	-0.102607
10.0627	112.757	12.0773	-1.3942	88.8092	-0.102522
10.071	112.844	12.0765	-1.39303	88.804	-0.102435
10.0793	112.929	12.0758	-1.39184	88.7987	-0.102348
10.0877	113.014	12.0751	-1.39067	88.7935	-0.102262
10.096	113.098	12.0744	-1.38947	88.7881	-0.102173
10.1043	113.185	12.0737	-1.38826	88.7826	-0.102085
10.1127	113.268	12.0729	-1.38706	88.7773	-0.101997
10.121	113.355	12.0722	-1.38587	88.7718	-0.101909
10.1293	113.439	12.0714	-1.38468	88.7663	-0.101821
10.1377	113.519	12.0707	-1.38349	88.7609	-0.101734
10.146	113.609	12.07	-1.38234	88.7557	-0.101649
10.1543	113.698	12.0693	-1.38119	88.7504	-0.101565
10.1627	113.782	12.0685	-1.38006	88.745	-0.101482
10.171	113.863	12.0678	-1.37891	88.7398	-0.101397
10.1793	113.948	12.0671	-1.37777	88.7345	-0.101313
10.1877	114.034	12.0664	-1.37663	88.7292	-0.101229
10.196	114.12	12.0657	-1.37553	88.7241	-0.101149
10.2043	114.202	12.065	-1.37447	88.7193	-0.101071
10.2127	114.289	12.0643	-1.37336	88.7142	-0.100989
10.221	114.375	12.0636	-1.37222	88.709	-0.100905
10.2293	114.457	12.0629	-1.37106	88.7036	-0.10082
10.2377	114.541	12.0622	-1.36991	88.6983	-0.100735
10.246	114.626	12.0615	-1.36877	88.6933	-0.100652
10.2543	114.715	12.0608	-1.36766	88.6882	-0.10057
10.2627	114.795	12.0601	-1.36657	88.6829	-0.10049
10.271	114.882	12.0594	-1.36547	88.6779	-0.100409
10.2793	114.965	12.0587	-1.36435	88.6725	-0.100327
10.2877	115.047	12.0579	-1.36318	88.6671	-0.100241
10.296	115.136	12.0572	-1.36206	88.6618	-0.100158
10.3043	115.219	12.0565	-1.36095	88.6565	-0.100077
10.3127	115.303	12.0558	-1.35988	88.6515	-0.0999976
10.321	115.384	12.0551	-1.35883	88.6465	-0.0999204
10.3293	115.473	12.0544	-1.35775	88.6411	-0.0998413
10.3377	115.56	12.0537	-1.35667	88.6357	-0.0997615
10.346	115.64	12.053	-1.35559	88.6307	-0.0996822
10.3543	115.728	12.0523	-1.35449	88.6257	-0.0996016
10.3627	115.813	12.0516	-1.35339	88.6208	-0.0995206
10.371	115.899	12.051	-1.35232	88.6157	-0.0994417
10.3793	115.983	12.0503	-1.35126	88.6107	-0.0993636
10.3877	116.065	12.0496	-1.35021	88.6057	-0.0992864
10.396	116.154	12.0489	-1.34914	88.6007	-0.0992077
10.4043	116.24	12.0482	-1.34805	88.5957	-0.099128
10.4127	116.318	12.0475	-1.34698	88.5907	-0.0990493
10.421	116.4	12.0469	-1.34592	88.5859	-0.0989714
10.4293	116.489	12.0462	-1.34485	88.5807	-0.0988925
10.4377	116.574	12.0455	-1.34378	88.5755	-0.0988135
10.446	116.657	12.0448	-1.34272	88.5704	-0.0987362
10.4543	116.742	12.0441	-1.34171	88.5653	-0.0986613
10.4627	116.82	12.0434	-1.34068	88.5604	-0.0985859
10.471	116.91	12.0427	-1.33964	88.5552	-0.0985094
10.4793	116.993	12.042	-1.33859	88.5499	-0.0984323
10.4877	117.08	12.0413	-1.33754	88.5448	-0.098355
10.496	117.16	12.0406	-1.3365	88.5398	-0.0982783
10.5043	117.251	12.0399	-1.33547	88.5348	-0.0982025
10.5127	117.333	12.0393	-1.33444	88.5298	-0.0981269
10.521	117.417	12.0386	-1.33346	88.5248	-0.0980549
10.5293	117.504	12.0379	-1.33245	88.5198	-0.097981
10.5377	117.59	12.0372	-1.33141	88.5147	-0.0979043
10.546	117.672	12.0365	-1.33038	88.5096	-0.0978285
10.5543	117.758	12.0359	-1.32936	88.5048	-0.0977538
10.5627	117.842	12.0352	-1.32837	88.4998	-0.0976805
10.571	117.926	12.0345	-1.32734	88.4948	-0.0976051
10.5793	118.008	12.0338	-1.32633	88.4899	-0.0975306
10.5877	118.098	12.0332	-1.3253	88.4851	-0.097455
10.596	118.177	12.0325	-1.32431	88.4803	-0.097382
10.6043	118.262	12.0319	-1.32328	88.4753	-0.0973066
10.6127	118.349	12.0312	-1.32226	88.4703	-0.0972311
10.621	118.435	12.0305	-1.32125	88.4653	-0.0971573
10.6293	118.517	12.0298	-1.32025	88.4604	-0.0970838
10.6377	118.601	12.0292	-1.31922	88.4555	-0.097008
10.646	118.681	12.0285	-1.31823	88.4509	-0.0969349
10.6543	118.771	12.0279	-1.31726	88.4459	-0.0968638
10.6627	118.853	12.0272	-1.31628	88.4408	-0.0967917
10.671	118.941	12.0265	-1.31533	88.4358	-0.0967219
10.6793	119.022	12.0258	-1.31435	88.4309	-0.0966498
10.6877	119.111	12.0252	-1.31333	88.4261	-0.096575
10.696	119.19	12.0245	-1.31239	88.4213	-0.0965057
10.7043	119.278	12.0239	-1.31145	88.4166	-0.0964368
10.7127	119.361	12.0232	-1.31051	88.4117	-0.0963673
10.721	119.449	12.0225	-1.30958	88.4067	-0.0962988
10.7293	119.53	12.0219	-1.30862	88.4017	-0.0962284
10.7377	119.618	12.0212	-1.30767	88.397	-0.0961584
10.746	119.701	12.0206	-1.30673	88.3923	-0.0960894
10.7543	119.784	12.0199	-1.30579	88.3875	-0.0960205
10.7627	119.869	12.0192	-1.30486	88.3825	-0.0959522
10.771	119.957	12.0185	-1.30398	88.3774	-0.0958871
10.7793	120.036	12.0179	-1.30306	88.3725	-0.0958198
10.7877	120.125	12.0172	-1.30211	88.3676	-0.0957496
10.796	120.202	12.0166	-1.30118	88.3628	-0.0956812
10.8043	120.288	12.0159	-1.30028	88.3581	-0.0956148
10.8127	120.376	12.0152	-1.29938	88.3532	-0.0955486
10.821	120.458	12.0146	-1.29848	88.3484	-0.0954824
10.8293	120.542	12.0139	-1.29754	88.3434	-0.0954137
10.8377	120.624	12.0132	-1.29662	88.3385	-0.0953457
10.846	120.714	12.0126	-1.2957	88.3336	-0.0952785
10.8543	120.796	12.0119	-1.29482	88.3289	-0.0952138
10.8627	120.88	12.0113	-1.29393	88.3245	-0.095148
10.871	120.964	12.0107	-1.29308	88.3198	-0.0950855
10.8793	121.048	12.0101	-1.29223	88.315	-0.0950231
10.8877	121.132	12.0094	-1.29137	88.3103	-0.0949597
10.896	121.212	12.0088	-1.2905	88.3056	-0.0948961
10.9043	121.297	12.0082	-1.28965	88.301	-0.0948335
10.9127	121.383	12.0075	-1.28881	88.2962	-0.0947718
10.921	121.466	12.0069	-1.28797	88.2916	-0.0947097
10.9293	121.553	12.0062	-1.28712	88.287	-0.0946473
10.9377	121.638	12.0056	-1.28625	88.2825	-0.0945834
10.946	121.725	12.0049	-1.28536	88.2775	-0.0945178
10.9543	121.81	12.0043	-1.28448	88.2727	-0.0944535
10.9627	121.894	12.0037	-1.28362	88.268	-0.0943903
10.971	121.982	12.003	-1.28275	88.2631	-0.0943259
10.9793	122.055	12.0024	-1.28188	88.2584	-0.0942621
10.9877	122.148	12.0017	-1.28098	88.2538	-0.0941962
10.996	122.231	12.0011	-1.28011	88.2491	-0.0941322
11.0043	122.318	12.0005	-1.27923	88.2444	-0.0940674
11.0127	122.399	11.9998	-1.27837	88.2395	-0.0940042
11.021	122.488	11.9991	-1.27751	88.2345	-0.0939407
11.0293	122.567	11.9985	-1.27668	88.2299	-0.0938797
11.0377	122.656	11.9979	-1.27583	88.2253	-0.0938173
11.046	122.737	11.9972	-1.27498	88.2206	-0.0937544
11.0543	122.823	11.9966	-1.27414	88.2159	-0.0936927
11.0627	122.903	11.9959	-1.27331	88.2112	-0.0936317
11.071	122.992	11.9953	-1.27249	88.2063	-0.0935717
11.0793	123.073	11.9946	-1.27169	88.2017	-0.0935127
11.0877	123.159	11.994	-1.2709	88.1971	-0.0934544
11.096	123.246	11.9934	-1.27007	88.1928	-0.0933939
11.1043	123.324	11.9928	-1.26927	88.1883	-0.0933351
11.1127	123.41	11.9922	-1.26848	88.1836	-0.0932765
11.121	123.496	11.9916	-1.26764	88.1789	-0.0932152
11.1293	123.582	11.9909	-1.26684	88.1742	-0.093156
11.1377	123.665	11.9903	-1.26602	88.1694	-0.0930959
11.146	123.749	11.9896	-1.26519	88.1647	-0.0930348
11.1543	123.836	11.989	-1.26439	88.16	-0.0929756
11.1627	123.917	11.9884	-1.26358	88.1555	-0.0929166
11.171	124.003	11.9877	-1.26279	88.1508	-0.0928583
11.1793	124.086	11.9871	-1.262	88.1463	-0.0928
11.1877	124.174	11.9865	-1.26118	88.1416	-0.0927402
11.196	124.257	11.9858	-1.26039	88.1369	-0.0926819
11.2043	124.34	11.9852	-1.25961	88.1325	-0.0926241
11.2127	124.421	11.9846	-1.25881	88.1279	-0.0925659
11.221	124.504	11.984	-1.25806	88.1235	-0.0925103
11.2293	124.591	11.9834	-1.2573	88.119	-0.0924547
11.2377	124.675	11.9828	-1.25652	88.1145	-0.0923971
11.246	124.76	11.9822	-1.2557	88.1099	-0.0923366
11.2543	124.843	11.9815	-1.25488	88.1053	-0.0922768
11.2627	124.93	11.9809	-1.25412	88.1005	-0.0922204
11.271	125.017	11.9803	-1.25334	88.0961	-0.0921636
11.2793	125.094	11.9797	-1.25254	88.0916	-0.0921049
11.2877	125.182	11.9791	-1.25176	88.0871	-0.0920471
11.296	125.268	11.9784	-1.25096	88.0825	-0.0919882
11.3043	125.349	11.9778	-1.25016	88.0778	-0.0919293
11.3127	125.436	11.9772	-1.24935	88.0731	-0.0918701
11.321	125.521	11.9765	-1.24858	88.0686	-0.0918133
11.3293	125.6	11.9759	-1.24784	88.0641	-0.0917591
11.3377	125.686	11.9753	-1.2471	88.0593	-0.0917042
11.346	125.767	11.9746	-1.24632	88.0545	-0.0916469
11.3543	125.855	11.974	-1.24554	88.0497	-0.0915895
11.3627	125.939	11.9733	-1.24477	88.045	-0.0915333
11.371	126.022	11.9727	-1.24405	88.0402	-0.0914804
11.3793	126.111	11.9721	-1.24328	88.0357	-0.0914236
11.3877	126.191	11.9715	-1.24248	88.0313	-0.0913649
11.396	126.275	11.9709	-1.24171	88.0269	-0.091308
11.4043	126.36	11.9703	-1.24095	88.0224	-0.0912525
11.4127	126.441	11.9696	-1.24018	88.0179	-0.0911959
11.421	126.532	11.9691	-1.23944	88.0136	-0.0911414
11.4293	126.613	11.9685	-1.23868	88.0094	-0.0910852
11.4377	126.7	11.9679	-1.23794	88.005	-0.0910313
11.446	126.777	11.9673	-1.23721	88.0005	-0.0909775
11.4543	126.869	11.9667	-1.23645	87.9961	-0.0909215
11.4627	126.943	11.9661	-1.23571	87.9918	-0.0908668
11.471	127.031	11.9655	-1.23501	87.9872	-0.0908156
11.4793	127.113	11.9649	-1.23432	87.9827	-0.0907647
11.4877	127.201	11.9643	-1.23355	87.9783	-0.0907084
11.496	127.285	11.9636	-1.2328	87.9738	-0.0906532
11.5043	127.368	11.9631	-1.23206	87.9694	-0.0905987
11.5127	127.451	11.9625	-1.23135	87.9649	-0.0905466
11.521	127.535	11.9619	-1.23062	87.9606	-0.0904925
11.5293	127.621	11.9613	-1.22987	87.9562	-0.0904372
11.5377	127.703	11.9607	-1.22911	87.9519	-0.0903819
11.546	127.787	11.9601	-1.22839	87.9474	-0.090329
11.5543	127.871	11.9595	-1.22765	87.943	-0.0902746
11.5627	127.956	11.9589	-1.22689	87.9388	-0.0902186
11.571	128.041	11.9583	-1.22619	87.9344	-0.0901666
11.5793	128.125	11.9577	-1.22545	87.9299	-0.0901124
11.5877	128.204	11.9571	-1.22469	87.9256	-0.0900564
11.596	128.297	11.9565	-1.22394	87.9212	-0.0900018
11.6043	128.377	11.9559	-1.22321	87.9167	-0.0899479
11.6127	128.46	11.9553	-1.2225	87.9122	-0.0898954
11.621	128.545	11.9547	-1.22181	87.9077	-0.0898448
11.6293	128.628	11.954	-1.22109	87.9031	-0.0897917
11.6377	128.709	11.9534	-1.22039	87.8987	-0.0897406
11.646	128.796	11.9528	-1.21972	87.8942	-0.0896913
11.6543	128.884	11.9522	-1.21901	87.8898	-0.0896393
11.6627	128.967	11.9516	-1.21834	87.8853	-0.0895895
11.671	129.054	11.951	-1.21764	87.8807	-0.0895384
11.6793	129.133	11.9504	-1.21693	87.8762	-0.0894858
11.6877	129.219	11.9498	-1.21624	87.8718	-0.089435
11.696	129.302	11.9492	-1.21553	87.8675	-0.0893829
11.7043	129.389	11.9486	-1.2148	87.8632	-0.0893295
11.7127	129.467	11.948	-1.21409	87.8589	-0.089277
11.721	129.557	11.9475	-1.21335	87.8547	-0.0892226
11.7293	129.64	11.9468	-1.21262	87.8502	-0.0891691
11.7377	129.721	11.9462	-1.21191	87.8458	-0.0891169
11.746	129.81	11.9457	-1.21121	87.8417	-0.0890656
11.7543	129.892	11.9451	-1.21054	87.8374	-0.089016
11.7627	129.973	11.9445	-1.20989	87.833	-0.0889685
11.771	130.058	11.9439	-1.20921	87.8287	-0.088918
11.7793	130.146	11.9433	-1.20852	87.8244	-0.0888673
11.7877	130.227	11.9428	-1.20783	87.8202	-0.0888171
11.796	130.311	11.9422	-1.20717	87.816	-0.0887682
11.8043	130.394	11.9415	-1.20652	87.8113	-0.0887205
11.8127	130.479	11.941	-1.20584	87.8069	-0.0886707
11.821	130.562	11.9404	-1.20517	87.8026	-0.0886213
11.8293	130.647	11.9398	-1.20446	87.7981	-0.088569
11.8377	130.732	11.9391	-1.20376	87.7936	-0.0885176
11.846	130.817	11.9386	-1.20305	87.7893	-0.0884655
11.8543	130.903	11.938	-1.20237	87.7849	-0.0884153
11.8627	130.981	11.9374	-1.20166	87.7805	-0.0883634
11.871	131.068	11.9368	-1.20097	87.776	-0.0883125
11.8793	131.152	11.9362	-1.20028	87.7716	-0.0882617
11.8877	131.235	11.9356	-1.1996	87.7674	-0.0882118
11.896	131.323	11.935	-1.19891	87.7632	-0.0881606
11.9043	131.402	11.9344	-1.19824	87.759	-0.0881114
11.9127	131.486	11.9338	-1.1976	87.7546	-0.0880643
11.921	131.574	11.9333	-1.19691	87.7504	-0.0880139
11.9293	131.657	11.9327	-1.19623	87.7462	-0.0879641
11.9377	131.739	11.9321	-1.19556	87.7418	-0.0879146
11.946	131.817	11.9315	-1.19492	87.7377	-0.0878677
11.9543	131.905	11.931	-1.19426	87.7335	-0.0878188
11.9627	131.991	11.9304	-1.19361	87.7293	-0.0877713
11.971	132.075	11.9298	-1.19295	87.7252	-0.0877227
11.9793	132.154	11.9293	-1.1923	87.7209	-0.0876752
11.9877	132.244	11.9287	-1.19163	87.7167	-0.0876259
11.996	132.333	11.9282	-1.19095	87.7127	-0.0875757
12.0043	132.416	11.9276	-1.19028	87.7086	-0.0875265
12.0127	132.498	11.927	-1.18961	87.7043	-0.0874773
12.021	132.584	11.9264	-1.18892	87.7001	-0.0874262
12.0293	132.67	11.9259	-1.18822	87.6959	-0.087375
12.0377	132.753	11.9253	-1.1876	87.6915	-0.087329
12.046	132.836	11.9247	-1.18693	87.6872	-0.08728
12.0543	132.919	11.9241	-1.18622	87.6832	-0.087228
12.0627	133.003	11.9236	-1.18554	87.679	-0.0871777
12.071	133.088	11.923	-1.18486	87.6749	-0.0871278
12.0793	133.173	11.9225	-1.18421	87.671	-0.0870801
12.0877	133.257	11.9219	-1.18356	87.6669	-0.0870325
12.096	133.337	11.9214	-1.18287	87.6629	-0.0869814
12.1043	133.426	11.9208	-1.18218	87.6588	-0.0869308
12.1127	133.511	11.9203	-1.18155	87.6547	-0.0868843
12.121	133.594	11.9197	-1.18087	87.6507	-0.0868342
12.1293	133.675	11.9192	-1.18017	87.6466	-0.086783
12.1377	133.763	11.9186	-1.1795	87.6424	-0.0867333
12.146	133.85	11.918	-1.17881	87.6383	-0.0866832
12.1543	133.933	11.9175	-1.17816	87.6341	-0.0866354
12.1627	134.012	11.9169	-1.17749	87.6297	-0.0865857
12.171	134.096	11.9163	-1.17681	87.6254	-0.0865358
12.1793	134.181	11.9157	-1.17621	87.6212	-0.0864915
12.1877	134.268	11.9152	-1.17561	87.6172	-0.0864476
12.196	134.346	11.9146	-1.17495	87.6131	-0.086399
12.2043	134.432	11.914	-1.17424	87.6089	-0.0863468
12.2127	134.518	11.9135	-1.17359	87.6048	-0.0862994
12.221	134.599	11.9129	-1.17295	87.6005	-0.0862523
12.2293	134.685	11.9123	-1.17234	87.5963	-0.086207
12.2377	134.767	11.9118	-1.17167	87.5923	-0.0861579
12.246	134.855	11.9112	-1.17102	87.5882	-0.0861098
12.2543	134.939	11.9107	-1.17036	87.5842	-0.0860618
12.2627	135.019	11.9101	-1.16966	87.5799	-0.0860097
12.271	135.106	11.9095	-1.16896	87.5759	-0.0859586
12.2793	135.19	11.909	-1.16827	87.5718	-0.0859082
12.2877	135.276	11.9084	-1.16764	87.5678	-0.0858616
12.296	135.355	11.9079	-1.16696	87.5638	-0.0858115
12.3043	135.444	11.9074	-1.16629	87.56	-0.0857619
12.3127	135.524	11.9068	-1.16557	87.5559	-0.0857096
12.321	135.612	11.9063	-1.16489	87.5519	-0.0856593
12.3293	135.691	11.9057	-1.16423	87.5479	-0.085611
12.3377	135.78	11.9052	-1.16356	87.544	-0.0855616
12.346	135.857	11.9047	-1.1629	87.5404	-0.0855129
12.3543	135.944	11.9042	-1.16224	87.5363	-0.0854645
12.3627	136.026	11.9036	-1.16158	87.5325	-0.0854159
12.371	136.114	11.9031	-1.16093	87.5285	-0.0853679
12.3793	136.191	11.9025	-1.16031	87.5244	-0.0853226
12.3877	136.28	11.902	-1.15966	87.5205	-0.0852747
12.396	136.362	11.9015	-1.159	87.5167	-0.0852265
12.4043	136.445	11.9009	-1.15838	87.5126	-0.0851809
12.4127	136.53	11.9004	-1.15774	87.5085	-0.0851334
12.421	136.616	11.8998	-1.15708	87.5045	-0.0850847
12.4293	136.697	11.8993	-1.15639	87.5003	-0.0850345
12.4377	136.786	11.8987	-1.15572	87.4965	-0.0849848
12.446	136.869	11.8982	-1.15505	87.4925	-0.0849359
12.4543	136.953	11.8977	-1.15436	87.4886	-0.0848853
12.4627	137.036	11.8972	-1.15366	87.4848	-0.0848338
12.471	137.123	11.8966	-1.153	87.4808	-0.0847851
12.4793	137.204	11.8961	-1.15234	87.4768	-0.0847368
12.4877	137.289	11.8955	-1.15166	87.4728	-0.0846868
12.496	137.371	11.895	-1.15097	87.469	-0.0846359
12.5043	137.456	11.8945	-1.15032	87.4652	-0.0845878
12.5127	137.54	11.894	-1.14967	87.4612	-0.08454
12.521	137.625	11.8934	-1.14901	87.4572	-0.0844913
12.5293	137.703	11.8928	-1.14834	87.4531	-0.0844425
12.5377	137.792	11.8923	-1.14768	87.4491	-0.0843936
12.546	137.872	11.8917	-1.147	87.4449	-0.0843438
12.5543	137.962	11.8912	-1.14633	87.441	-0.0842946
12.5627	138.044	11.8907	-1.14568	87.4372	-0.084247
12.571	138.129	11.8901	-1.14502	87.4332	-0.0841983
12.5793	138.212	11.8896	-1.14434	87.4292	-0.0841484
12.5877	138.299	11.8891	-1.14367	87.4253	-0.0840993
12.596	138.379	11.8885	-1.14301	87.4214	-0.0840505
12.6043	138.462	11.888	-1.14237	87.4175	-0.0840031
12.6127	138.545	11.8875	-1.1417	87.4137	-0.0839542
12.621	138.631	11.887	-1.14106	87.4098	-0.0839067
12.6293	138.715	11.8865	-1.1404	87.4063	-0.0838582
12.6377	138.8	11.886	-1.13974	87.4025	-0.08381
12.646	138.885	11.8854	-1.13908	87.3985	-0.0837615
12.6543	138.974	11.8849	-1.13842	87.3946	-0.0837127
12.6627	139.056	11.8843	-1.13777	87.3906	-0.0836654
12.671	139.139	11.8838	-1.1371	87.3867	-0.0836156
12.6793	139.222	11.8833	-1.13644	87.383	-0.0835675
12.6877	139.302	11.8828	-1.13576	87.3792	-0.083517
12.696	139.388	11.8823	-1.13514	87.3753	-0.0834717
12.7043	139.474	11.8817	-1.13449	87.3715	-0.0834241
12.7127	139.558	11.8812	-1.13385	87.3676	-0.0833769
12.721	139.643	11.8807	-1.13322	87.3638	-0.0833307
12.7293	139.73	11.8802	-1.13257	87.3602	-0.0832829
12.7377	139.809	11.8797	-1.13191	87.3567	-0.0832338
12.746	139.897	11.8792	-1.13127	87.3531	-0.0831868
12.7543	139.985	11.8787	-1.13066	87.3492	-0.0831421
12.7627	140.064	11.8782	-1.13003	87.3454	-0.0830957
12.771	140.151	11.8777	-1.12941	87.3417	-0.08305
12.7793	140.233	11.8772	-1.12878	87.3378	-0.0830037
12.7877	140.317	11.8767	-1.12815	87.3341	-0.0829575
12.796	140.402	11.8762	-1.12753	87.3303	-0.082912
12.8043	140.484	11.8756	-1.12687	87.3266	-0.0828637
12.8127	140.57	11.8751	-1.12624	87.3226	-0.0828169
12.821	140.651	11.8746	-1.12565	87.3187	-0.0827735
12.8293	140.737	11.8741	-1.12502	87.3149	-0.0827273
12.8377	140.823	11.8736	-1.12438	87.3113	-0.0826808
12.846	140.907	11.873	-1.12376	87.3074	-0.0826345
12.8543	140.991	11.8725	-1.12314	87.3035	-0.0825895
12.8627	141.074	11.872	-1.12251	87.2998	-0.0825429
12.871	141.156	11.8715	-1.12189	87.296	-0.0824972
12.8793	141.243	11.871	-1.12125	87.2922	-0.0824503
12.8877	141.323	11.8704	-1.12065	87.2884	-0.0824062
12.896	141.407	11.8699	-1.12004	87.2846	-0.082361
12.9043	141.493	11.8694	-1.1194	87.281	-0.0823146
12.9127	141.574	11.8689	-1.11877	87.2773	-0.0822677
12.921	141.663	11.8684	-1.11813	87.2737	-0.082221
12.9293	141.742	11.8679	-1.11754	87.27	-0.0821774
12.9377	141.826	11.8674	-1.11694	87.2662	-0.0821333
12.946	141.913	11.8669	-1.11629	87.2625	-0.0820857
12.9543	141.998	11.8664	-1.11568	87.2588	-0.0820404
12.9627	142.081	11.8659	-1.11509	87.2551	-0.0819974
12.971	142.161	11.8654	-1.11446	87.2514	-0.0819512
12.9793	142.248	11.8649	-1.11385	87.2476	-0.0819059
12.9877	142.332	11.8644	-1.11324	87.2438	-0.0818614
12.996	142.416	11.8639	-1.11265	87.24	-0.0818181
13.0043	142.499	11.8634	-1.11206	87.2362	-0.0817742
13.0127	142.58	11.8628	-1.11145	87.2325	-0.0817297
13.021	142.67	11.8624	-1.11084	87.229	-0.081685
13.0293	142.752	11.8619	-1.11023	87.2255	-0.08164
13.0377	142.841	11.8614	-1.10962	87.222	-0.0815951
13.046	142.924	11.8609	-1.109	87.2184	-0.0815495
13.0543	142.999	11.8604	-1.10841	87.2148	-0.081506
13.0627	143.087	11.8599	-1.1078	87.2111	-0.0814614
13.071	143.173	11.8595	-1.1072	87.2076	-0.0814175
13.0793	143.256	11.859	-1.10659	87.2042	-0.0813725
13.0877	143.343	11.8585	-1.10599	87.2006	-0.0813281
13.096	143.43	11.858	-1.10536	87.197	-0.0812816
13.1043	143.51	11.8575	-1.10475	87.1934	-0.0812369
13.1127	143.594	11.857	-1.10417	87.1897	-0.0811943
13.121	143.676	11.8565	-1.10356	87.1859	-0.0811492
13.1293	143.761	11.856	-1.10295	87.1822	-0.0811044
13.1377	143.851	11.8555	-1.10234	87.1785	-0.0810596
13.146	143.933	11.855	-1.10174	87.175	-0.0810156
13.1543	144.016	11.8545	-1.10115	87.1713	-0.0809718
13.1627	144.1	11.854	-1.10054	87.1676	-0.0809275
13.171	144.182	11.8535	-1.09994	87.1641	-0.0808832
13.1793	144.268	11.8531	-1.09934	87.1606	-0.0808393
13.1877	144.35	11.8526	-1.09874	87.1572	-0.0807951
13.196	144.435	11.8521	-1.09815	87.1535	-0.0807514
13.2043	144.516	11.8516	-1.09755	87.1498	-0.0807075
13.2127	144.597	11.8511	-1.09695	87.1461	-0.080663
13.221	144.684	11.8506	-1.09635	87.1427	-0.0806192
13.2293	144.772	11.8501	-1.09578	87.1389	-0.0805772
13.2377	144.849	11.8496	-1.09516	87.1353	-0.080532
13.246	144.934	11.8491	-1.09458	87.1317	-0.0804893
13.2543	145.025	11.8486	-1.09398	87.128	-0.0804447
13.2627	145.104	11.8481	-1.0934	87.1244	-0.0804027
13.271	145.19	11.8476	-1.09285	87.1207	-0.0803616
13.2793	145.269	11.8471	-1.09229	87.117	-0.0803204
13.2877	145.356	11.8466	-1.09172	87.1133	-0.0802787
13.296	145.443	11.8461	-1.09117	87.1097	-0.0802383
13.3043	145.526	11.8457	-1.09061	87.1063	-0.0801968
13.3127	145.611	11.8452	-1.09003	87.1028	-0.0801541
13.321	145.692	11.8447	-1.08945	87.0993	-0.0801116
13.3293	145.777	11.8443	-1.08888	87.0958	-0.08007
13.3377	145.859	11.8438	-1.08835	87.0925	-0.0800307
13.346	145.945	11.8433	-1.08776	87.0888	-0.0799877
13.3543	146.028	11.8428	-1.0872	87.0851	-0.0799461
13.3627	146.111	11.8423	-1.08663	87.0816	-0.0799043
13.371	146.197	11.8418	-1.08609	87.0781	-0.0798646
13.3793	146.281	11.8413	-1.08553	87.0744	-0.0798232
13.3877	146.363	11.8408	-1.08495	87.0707	-0.0797812
13.396	146.447	11.8404	-1.08441	87.0672	-0.079741
13.4043	146.532	11.8399	-1.08388	87.0636	-0.0797023
13.4127	146.618	11.8393	-1.08335	87.0597	-0.0796632
13.421	146.704	11.8388	-1.0828	87.0558	-0.0796229
13.4293	146.785	11.8384	-1.08228	87.0525	-0.0795843
13.4377	146.864	11.8379	-1.0817	87.0489	-0.0795423
13.446	146.951	11.8374	-1.08114	87.0457	-0.0795008
13.4543	147.033	11.837	-1.08058	87.0423	-0.0794599
13.4627	147.119	11.8365	-1.08007	87.0389	-0.0794221
13.471	147.203	11.836	-1.07956	87.0354	-0.0793844
13.4793	147.284	11.8356	-1.07902	87.0319	-0.0793447
13.4877	147.372	11.8351	-1.07849	87.0283	-0.0793056
13.496	147.458	11.8346	-1.07793	87.0249	-0.0792645
13.5043	147.545	11.8342	-1.07737	87.0217	-0.0792239
13.5127	147.627	11.8337	-1.07685	87.0182	-0.0791855
13.521	147.711	11.8332	-1.07633	87.0145	-0.0791469
13.5293	147.797	11.8327	-1.07581	87.0108	-0.079109
13.5377	147.876	11.8322	-1.0753	87.0072	-0.0790713
13.546	147.962	11.8317	-1.07476	87.0037	-0.0790315
13.5543	148.042	11.8312	-1.07424	87.0001	-0.0789935
13.5627	148.132	11.8308	-1.07373	86.9967	-0.0789558
13.571	148.219	11.8303	-1.07323	86.9932	-0.0789188
13.5793	148.297	11.8298	-1.0727	86.9896	-0.0788802
13.5877	148.384	11.8293	-1.07219	86.9859	-0.0788424
13.596	148.464	11.8288	-1.07165	86.9824	-0.0788027
13.6043	148.552	11.8284	-1.07113	86.9789	-0.0787648
13.6127	148.634	11.8279	-1.07063	86.9755	-0.0787279
13.621	148.715	11.8274	-1.07011	86.9719	-0.0786901
13.6293	148.801	11.8269	-1.0696	86.9684	-0.0786519
13.6377	148.885	11.8265	-1.06908	86.965	-0.0786141
13.646	148.97	11.826	-1.06856	86.9615	-0.0785761
13.6543	149.055	11.8255	-1.06802	86.9582	-0.0785359
13.6627	149.133	11.8251	-1.06752	86.9547	-0.0784995
13.671	149.223	11.8246	-1.06703	86.951	-0.0784631
13.6793	149.302	11.8241	-1.06656	86.9475	-0.0784287
13.6877	149.388	11.8237	-1.06607	86.9443	-0.0783926
13.696	149.471	11.8232	-1.06557	86.941	-0.0783556
13.7043	149.554	11.8227	-1.06506	86.9376	-0.0783185
13.7127	149.64	11.8223	-1.06455	86.9342	-0.0782807
13.721	149.725	11.8218	-1.06403	86.9308	-0.0782428
13.7293	149.809	11.8213	-1.0635	86.9271	-0.0782034
13.7377	149.894	11.8208	-1.063	86.9236	-0.0781669
13.746	149.972	11.8204	-1.06251	86.9202	-0.0781306
13.7543	150.058	11.8199	-1.06199	86.9169	-0.0780924
13.7627	150.142	11.8195	-1.06144	86.9136	-0.0780522
13.771	150.229	11.819	-1.06091	86.9101	-0.0780133
13.7793	150.308	11.8185	-1.06039	86.9065	-0.0779747
13.7877	150.394	11.818	-1.05987	86.9031	-0.0779371
13.796	150.474	11.8176	-1.05934	86.8997	-0.0778976
13.8043	150.562	11.8171	-1.05882	86.8962	-0.0778594
13.8127	150.644	11.8167	-1.05832	86.8929	-0.0778225
13.821	150.733	11.8162	-1.05779	86.8894	-0.0777837
13.8293	150.81	11.8157	-1.05724	86.8861	-0.0777435
13.8377	150.895	11.8153	-1.05674	86.8827	-0.0777063
13.846	150.979	11.8148	-1.05622	86.8794	-0.0776683
13.8543	151.069	11.8144	-1.0557	86.8761	-0.07763
13.8627	151.147	11.8139	-1.05516	86.8727	-0.0775904
13.871	151.23	11.8134	-1.05462	86.8691	-0.0775507
13.8793	151.315	11.813	-1.05409	86.866	-0.0775117
13.8877	151.399	11.8126	-1.05355	86.8629	-0.0774721
13.896	151.484	11.8121	-1.05302	86.8594	-0.0774331
13.9043	151.574	11.8116	-1.05249	86.8559	-0.0773939
13.9127	151.651	11.8111	-1.05192	86.8524	-0.0773518
13.921	151.736	11.8107	-1.05135	86.849	-0.0773104
13.9293	151.819	11.8102	-1.05083	86.8455	-0.0772723
13.9377	151.911	11.8098	-1.05028	86.8422	-0.0772312
13.946	151.996	11.8093	-1.04974	86.8389	-0.0771917
13.9543	152.077	11.8089	-1.04917	86.836	-0.0771498
13.9627	152.161	11.8085	-1.04865	86.8326	-0.0771114
13.971	152.243	11.808	-1.04811	86.8291	-0.0770722
13.9793	152.328	11.8076	-1.04756	86.8261	-0.0770317
13.9877	152.414	11.8072	-1.04703	86.823	-0.0769924
13.996	152.496	11.8067	-1.04656	86.8197	-0.0769578
14.0043	152.58	11.8063	-1.04603	86.8164	-0.0769193
14.0127	152.661	11.8058	-1.04544	86.8131	-0.0768756
14.021	152.752	11.8053	-1.04489	86.8097	-0.0768352
14.0293	152.83	11.8049	-1.04432	86.8064	-0.0767931
14.0377	152.917	11.8044	-1.04377	86.8028	-0.0767528
14.046	153.001	11.804	-1.0432	86.7996	-0.0767108
14.0543	153.084	11.8035	-1.04262	86.7964	-0.0766686
14.0627	153.164	11.8031	-1.04206	86.7932	-0.076627
14.071	153.253	11.8027	-1.04147	86.7901	-0.0765839
14.0793	153.332	11.8023	-1.04085	86.787	-0.0765377
14.0877	153.415	11.8018	-1.04021	86.7838	-0.0764913
14.096	153.501	11.8014	-1.03965	86.7807	-0.0764499
14.1043	153.588	11.801	-1.03906	86.7777	-0.0764061
14.1127	153.665	11.8006	-1.03848	86.7746	-0.0763636
14.121	153.752	11.8002	-1.03788	86.7715	-0.0763195
14.1293	153.837	11.7997	-1.0373	86.7682	-0.0762774
14.1377	153.921	11.7993	-1.03671	86.765	-0.0762334
14.146	154.004	11.7988	-1.03613	86.7616	-0.0761912
14.1543	154.088	11.7983	-1.03553	86.7583	-0.0761472
14.1627	154.169	11.7979	-1.03498	86.7549	-0.0761062
14.171	154.254	11.7975	-1.03442	86.7519	-0.076065
14.1793	154.34	11.7971	-1.03384	86.7488	-0.0760228
14.1877	154.428	11.7966	-1.03325	86.7455	-0.0759794
14.196	154.508	11.7962	-1.03266	86.7422	-0.0759359
14.2043	154.595	11.7957	-1.03207	86.7389	-0.0758926
14.2127	154.682	11.7953	-1.03145	86.7358	-0.0758472
14.221	154.764	11.7949	-1.03086	86.7327	-0.0758038
14.2293	154.847	11.7945	-1.03024	86.7297	-0.0757581
14.2377	154.932	11.794	-1.02966	86.7266	-0.075715
14.246	155.015	11.7936	-1.02904	86.7235	-0.0756697
14.2543	155.102	11.7932	-1.02846	86.7202	-0.0756268
14.2627	155.182	11.7927	-1.02782	86.7169	-0.0755803
14.271	155.266	11.7923	-1.02726	86.7136	-0.0755385
14.2793	155.353	11.7919	-1.02668	86.7105	-0.0754957
14.2877	155.437	11.7914	-1.02608	86.7074	-0.0754518
14.296	155.522	11.791	-1.02548	86.7044	-0.0754078
14.3043	155.606	11.7906	-1.02484	86.7015	-0.0753607
14.3127	155.688	11.7902	-1.02421	86.6985	-0.0753146
14.321	155.774	11.7898	-1.02361	86.6955	-0.07527
14.3293	155.854	11.7894	-1.02298	86.6923	-0.0752237
14.3377	155.936	11.789	-1.02239	86.6892	-0.0751804
14.346	156.023	11.7886	-1.02181	86.6863	-0.0751382
14.3543	156.108	11.7882	-1.02117	86.6834	-0.0750906
14.3627	156.191	11.7878	-1.02053	86.6805	-0.0750438
14.371	156.275	11.7873	-1.01993	86.6774	-0.0750001
14.3793	156.358	11.7869	-1.01935	86.6743	-0.074957
14.3877	156.444	11.7865	-1.01878	86.6713	-0.0749153
14.396	156.53	11.7861	-1.01818	86.6681	-0.0748708
14.4043	156.613	11.7857	-1.01752	86.6652	-0.0748226
14.4127	156.695	11.7853	-1.01691	86.6621	-0.0747775
14.421	156.779	11.7849	-1.01626	86.6591	-0.07473
14.4293	156.864	11.7845	-1.01562	86.6562	-0.0746827
14.4377	156.948	11.7841	-1.01503	86.6531	-0.0746394
14.446	157.032	11.7837	-1.01444	86.6502	-0.0745959
14.4543	157.112	11.7833	-1.01383	86.6474	-0.0745511
14.4627	157.199	11.7828	-1.01316	86.6441	-0.0745019
14.471	157.286	11.7824	-1.01251	86.6409	-0.0744543
14.4793	157.368	11.782	-1.01191	86.6379	-0.0744099
14.4877	157.453	11.7816	-1.01131	86.6349	-0.0743662
14.496	157.537	11.7812	-1.01072	86.632	-0.0743224
14.5043	157.619	11.7808	-1.01011	86.6291	-0.0742777
14.5127	157.709	11.7804	-1.0095	86.6261	-0.0742327
14.521	157.791	11.78	-1.00887	86.6232	-0.0741866
14.5293	157.873	11.7796	-1.00824	86.6204	-0.0741399
14.5377	157.956	11.7792	-1.00761	86.6174	-0.0740937
14.546	158.046	11.7788	-1.00703	86.6146	-0.0740512
14.5543	158.127	11.7784	-1.00645	86.6118	-0.0740082
14.5627	158.208	11.778	-1.00585	86.6089	-0.0739645
14.571	158.298	11.7776	-1.00524	86.606	-0.0739199
14.5793	158.379	11.7773	-1.00462	86.6032	-0.0738739
14.5877	158.463	11.7769	-1.00397	86.6004	-0.0738264
14.596	158.548	11.7765	-1.00336	86.5974	-0.0737815
14.6043	158.632	11.7761	-1.00275	86.5943	-0.0737363
14.6127	158.72	11.7756	-1.00214	86.5913	-0.0736917
14.621	158.798	11.7752	-1.00151	86.5884	-0.0736453
14.6293	158.885	11.7748	-1.00087	86.5854	-0.0735982
14.6377	158.97	11.7744	-1.00025	86.5824	-0.0735527
14.646	159.05	11.774	-0.999608	86.5795	-0.0735054
14.6543	159.139	11.7736	-0.998989	86.5765	-0.0734599
14.6627	159.217	11.7732	-0.998353	86.5735	-0.0734131
14.671	159.3	11.7728	-0.997741	86.5706	-0.0733681
14.6793	159.387	11.7724	-0.997113	86.5676	-0.0733219
14.6877	159.469	11.772	-0.996511	86.5646	-0.0732777
14.696	159.555	11.7716	-0.995885	86.5617	-0.0732317
14.7043	159.641	11.7712	-0.99527	86.5587	-0.0731864
14.7127	159.727	11.7708	-0.99466	86.5558	-0.0731416
14.721	159.807	11.7704	-0.994031	86.5529	-0.0730953
14.7293	159.893	11.77	-0.993437	86.55	-0.0730516
14.7377	159.973	11.7697	-0.992827	86.5473	-0.0730067
14.746	160.058	11.7693	-0.992248	86.5443	-0.0729642
14.7543	160.144	11.7689	-0.99166	86.5414	-0.072921
14.7627	160.232	11.7685	-0.991057	86.5385	-0.0728766
14.771	160.313	11.7681	-0.990423	86.5358	-0.07283
14.7793	160.399	11.7677	-0.989829	86.5332	-0.0727863
14.7877	160.482	11.7674	-0.989266	86.5304	-0.0727449
14.796	160.563	11.767	-0.988707	86.5276	-0.0727038
14.8043	160.652	11.7667	-0.988106	86.5252	-0.0726596
14.8127	160.734	11.7663	-0.987479	86.5225	-0.0726135
14.821	160.819	11.7659	-0.986896	86.5196	-0.0725706
14.8293	160.899	11.7655	-0.986295	86.5165	-0.0725264
14.8377	160.984	11.7651	-0.985716	86.5137	-0.0724839
14.846	161.067	11.7647	-0.985131	86.5111	-0.0724409
14.8543	161.15	11.7644	-0.984547	86.5085	-0.0723979
14.8627	161.237	11.764	-0.983932	86.5057	-0.0723527
14.871	161.321	11.7636	-0.983316	86.503	-0.0723073
14.8793	161.406	11.7632	-0.982696	86.5001	-0.0722618
14.8877	161.487	11.7629	-0.982101	86.4974	-0.072218
14.896	161.57	11.7625	-0.981534	86.4945	-0.0721764
14.9043	161.66	11.7621	-0.980908	86.4918	-0.0721303
14.9127	161.743	11.7618	-0.9803	86.4893	-0.0720856
14.921	161.824	11.7614	-0.979699	86.4867	-0.0720414
14.9293	161.906	11.7611	-0.979101	86.484	-0.0719974
14.9377	161.992	11.7607	-0.978526	86.4812	-0.0719551
14.946	162.078	11.7603	-0.977933	86.4784	-0.0719116
14.9543	162.164	11.7599	-0.977336	86.4757	-0.0718677
14.9627	162.248	11.7595	-0.976757	86.4729	-0.0718251
14.971	162.328	11.7591	-0.976212	86.4698	-0.071785
14.9793	162.414	11.7587	-0.975641	86.4671	-0.071743
14.9877	162.497	11.7584	-0.975087	86.4645	-0.0717023
14.996	162.578	11.758	-0.974532	86.4615	-0.0716615
15.0043	162.667	11.7576	-0.973971	86.4587	-0.0716202
15.0127	162.749	11.7573	-0.973378	86.456	-0.0715766
15.021	162.833	11.7569	-0.972799	86.4533	-0.071534
15.0293	162.917	11.7565	-0.972248	86.4507	-0.0714935
15.0377	163.002	11.7561	-0.97169	86.4479	-0.0714525
15.046	163.087	11.7558	-0.971101	86.4454	-0.0714092
15.0543	163.17	11.7554	-0.970501	86.4428	-0.0713651
15.0627	163.253	11.7551	-0.969947	86.4403	-0.0713243
15.071	163.342	11.7547	-0.969385	86.4376	-0.071283
15.0793	163.422	11.7544	-0.968805	86.4349	-0.0712403
15.0877	163.508	11.754	-0.96821	86.4323	-0.0711966
15.096	163.589	11.7536	-0.967639	86.4295	-0.0711546
15.1043	163.674	11.7533	-0.967075	86.4267	-0.0711131
15.1127	163.756	11.7529	-0.966495	86.424	-0.0710705
15.121	163.843	11.7525	-0.965922	86.4212	-0.0710283
15.1293	163.927	11.7522	-0.965383	86.4185	-0.0709887
15.1377	164.012	11.7518	-0.964826	86.416	-0.0709477
15.146	164.092	11.7514	-0.964221	86.4133	-0.0709032
15.1543	164.18	11.7511	-0.963634	86.4107	-0.0708601
15.1627	164.262	11.7507	-0.963085	86.4081	-0.0708197
15.171	164.344	11.7504	-0.962557	86.4054	-0.0707809
15.1793	164.424	11.75	-0.962007	86.4029	-0.0707404
15.1877	164.514	11.7497	-0.96143	86.4002	-0.070698
15.196	164.594	11.7493	-0.960874	86.3978	-0.0706571
15.2043	164.678	11.749	-0.960295	86.3951	-0.0706145
15.2127	164.766	11.7486	-0.959704	86.3926	-0.0705711
15.221	164.849	11.7482	-0.959123	86.3897	-0.0705284
15.2293	164.932	11.7478	-0.958564	86.3867	-0.0704872
15.2377	165.018	11.7475	-0.958006	86.384	-0.0704463
15.246	165.095	11.7471	-0.957436	86.3814	-0.0704043
15.2543	165.182	11.7467	-0.956853	86.3787	-0.0703614
15.2627	165.267	11.7464	-0.956295	86.3759	-0.0703204
15.271	165.355	11.746	-0.955754	86.3733	-0.0702807
15.2793	165.435	11.7456	-0.955211	86.3704	-0.0702407
15.2877	165.52	11.7452	-0.954675	86.3676	-0.0702013
15.296	165.607	11.7448	-0.954118	86.3648	-0.0701603
15.3043	165.687	11.7445	-0.953544	86.362	-0.0701181
15.3127	165.771	11.7441	-0.95297	86.3595	-0.0700759
15.321	165.86	11.7438	-0.952415	86.3568	-0.0700351
15.3293	165.942	11.7434	-0.951854	86.3541	-0.0699938
15.3377	166.021	11.7431	-0.951287	86.3516	-0.0699522
15.346	166.106	11.7427	-0.950738	86.3492	-0.0699118
15.3543	166.197	11.7424	-0.95017	86.3466	-0.06987
15.3627	166.277	11.742	-0.949603	86.3442	-0.0698283
15.371	166.364	11.7417	-0.949056	86.3418	-0.0697881
15.3793	166.444	11.7414	-0.948526	86.3395	-0.0697491
15.3877	166.533	11.7411	-0.948004	86.3371	-0.0697107
15.396	166.613	11.7407	-0.947489	86.3345	-0.0696729
15.4043	166.703	11.7404	-0.946929	86.332	-0.0696317
15.4127	166.786	11.7401	-0.946395	86.3295	-0.0695925
15.421	166.867	11.7397	-0.945867	86.3269	-0.0695536
15.4293	166.951	11.7393	-0.9453	86.3241	-0.0695119
15.4377	167.037	11.739	-0.944748	86.3216	-0.0694713
15.446	167.12	11.7386	-0.944183	86.319	-0.0694298
15.4543	167.208	11.7383	-0.943622	86.3163	-0.0693885
15.4627	167.288	11.7379	-0.943051	86.3139	-0.0693465
15.471	167.375	11.7376	-0.942504	86.3115	-0.0693063
15.4793	167.455	11.7373	-0.941938	86.3092	-0.0692647
15.4877	167.54	11.7369	-0.941398	86.3066	-0.069225
15.496	167.621	11.7366	-0.940846	86.3041	-0.0691844
15.5043	167.711	11.7362	-0.940289	86.3014	-0.0691434
15.5127	167.791	11.7359	-0.939777	86.2989	-0.0691058
15.521	167.873	11.7355	-0.939236	86.2962	-0.069066
15.5293	167.956	11.7352	-0.938699	86.2937	-0.0690265
15.5377	168.046	11.7348	-0.938154	86.2912	-0.0689864
15.546	168.125	11.7345	-0.937634	86.2887	-0.0689482
15.5543	168.213	11.7341	-0.937075	86.2861	-0.0689071
15.5627	168.293	11.7338	-0.936555	86.2833	-0.0688689
15.571	168.376	11.7334	-0.936027	86.2808	-0.06883
15.5793	168.462	11.7331	-0.935487	86.2783	-0.0687903
15.5877	168.544	11.7328	-0.934943	86.276	-0.0687503
15.596	168.626	11.7325	-0.934387	86.2737	-0.0687094
15.6043	168.712	11.7321	-0.933869	86.2712	-0.0686713
15.6127	168.794	11.7318	-0.933347	86.2689	-0.068633
15.621	168.88	11.7315	-0.932826	86.2665	-0.0685946
15.6293	168.964	11.7311	-0.932265	86.2639	-0.0685534
15.6377	169.049	11.7308	-0.931748	86.2615	-0.0685154
15.646	169.134	11.7305	-0.931218	86.2592	-0.0684764
15.6543	169.215	11.7302	-0.930666	86.2568	-0.0684358
15.6627	169.3	11.7298	-0.930152	86.2544	-0.068398
15.671	169.386	11.7295	-0.929652	86.2518	-0.0683613
15.6793	169.472	11.7291	-0.929134	86.2492	-0.0683231
15.6877	169.555	11.7288	-0.928587	86.2467	-0.0682829
15.696	169.634	11.7285	-0.928052	86.2443	-0.0682436
15.7043	169.72	11.7281	-0.927526	86.2416	-0.0682049
15.7127	169.803	11.7278	-0.927003	86.2391	-0.0681665
15.721	169.887	11.7274	-0.926462	86.2365	-0.0681267
15.7293	169.973	11.727	-0.925919	86.2339	-0.0680867
15.7377	170.056	11.7267	-0.925403	86.2314	-0.0680488
15.746	170.141	11.7264	-0.924846	86.229	-0.0680078
15.7543	170.221	11.7261	-0.924275	86.2267	-0.0679659
15.7627	170.309	11.7257	-0.923717	86.2243	-0.0679248
15.771	170.394	11.7254	-0.923192	86.2219	-0.0678862
15.7793	170.476	11.7251	-0.922689	86.2193	-0.0678492
15.7877	170.562	11.7247	-0.92218	86.2168	-0.0678118
15.796	170.648	11.7244	-0.921699	86.2143	-0.0677764
15.8043	170.73	11.7241	-0.921194	86.212	-0.0677393
15.8127	170.812	11.7238	-0.92067	86.2097	-0.0677007
15.821	170.897	11.7234	-0.920168	86.2075	-0.0676638
15.8293	170.98	11.7231	-0.91968	86.205	-0.067628
15.8377	171.066	11.7228	-0.919178	86.2024	-0.067591
15.846	171.154	11.7224	-0.918684	86.2001	-0.0675547
15.8543	171.231	11.7221	-0.918177	86.1979	-0.0675174
15.8627	171.316	11.7218	-0.917657	86.1954	-0.0674792
15.871	171.403	11.7215	-0.917105	86.1931	-0.0674386
15.8793	171.486	11.7212	-0.916566	86.1909	-0.067399
15.8877	171.566	11.7209	-0.91604	86.1884	-0.0673603
15.896	171.651	11.7205	-0.915523	86.186	-0.0673223
15.9043	171.735	11.7202	-0.915009	86.1834	-0.0672845
15.9127	171.818	11.7198	-0.914499	86.1809	-0.067247
15.921	171.898	11.7195	-0.914001	86.1787	-0.0672103
15.9293	171.985	11.7192	-0.91348	86.1762	-0.067172
15.9377	172.068	11.7189	-0.912969	86.1737	-0.0671345
15.946	172.157	11.7186	-0.912431	86.1714	-0.0670949
15.9543	172.236	11.7182	-0.911941	86.1691	-0.0670588
15.9627	172.32	11.7179	-0.911419	86.1665	-0.0670205
15.971	172.404	11.7175	-0.910918	86.1641	-0.0669836
15.9793	172.486	11.7172	-0.910431	86.1617	-0.0669478
15.9877	172.577	11.7169	-0.909904	86.1595	-0.0669091
15.996	172.657	11.7166	-0.909384	86.157	-0.0668709
16.0043	172.741	11.7163	-0.908872	86.1547	-0.0668332
16.0127	172.822	11.716	-0.908369	86.1524	-0.0667962
16.021	172.911	11.7156	-0.907839	86.15	-0.0667572
16.0293	172.994	11.7153	-0.907344	86.1474	-0.0667209
16.0377	173.078	11.7149	-0.906797	86.145	-0.0666806
16.046	173.162	11.7146	-0.906277	86.1425	-0.0666424
16.0543	173.248	11.7143	-0.905773	86.1402	-0.0666053
16.0627	173.328	11.714	-0.905244	86.1381	-0.0665664
16.071	173.411	11.7137	-0.90475	86.1357	-0.0665301
16.0793	173.496	11.7134	-0.904241	86.1334	-0.0664927
16.0877	173.581	11.713	-0.90371	86.1309	-0.0664536
16.096	173.663	11.7127	-0.903223	86.1285	-0.0664178
16.1043	173.748	11.7124	-0.902762	86.1261	-0.0663839
16.1127	173.831	11.7121	-0.902261	86.1239	-0.066347
16.121	173.913	11.7118	-0.90181	86.1218	-0.0663139
16.1293	173.999	11.7115	-0.901337	86.1197	-0.0662791
16.1377	174.081	11.7112	-0.900825	86.1174	-0.0662415
16.146	174.165	11.7109	-0.90033	86.115	-0.066205
16.1543	174.255	11.7105	-0.899809	86.1125	-0.0661667
16.1627	174.333	11.7102	-0.899287	86.1103	-0.0661284
16.171	174.421	11.71	-0.898802	86.1083	-0.0660927
16.1793	174.504	11.7096	-0.898288	86.106	-0.0660549
16.1877	174.59	11.7093	-0.897763	86.1036	-0.0660163
16.196	174.673	11.709	-0.897262	86.1011	-0.0659795
16.2043	174.755	11.7086	-0.896751	86.0984	-0.0659419
16.2127	174.838	11.7083	-0.896273	86.0961	-0.0659067
16.221	174.923	11.708	-0.895799	86.0939	-0.0658719
16.2293	175.007	11.7077	-0.895342	86.0917	-0.0658383
16.2377	175.089	11.7074	-0.894897	86.0895	-0.0658056
16.246	175.176	11.7071	-0.894431	86.0873	-0.0657713
16.2543	175.26	11.7068	-0.893964	86.085	-0.065737
16.2627	175.338	11.7065	-0.893484	86.0828	-0.0657016
16.271	175.424	11.7062	-0.892977	86.0806	-0.0656644
16.2793	175.51	11.7059	-0.892503	86.0786	-0.0656295
16.2877	175.593	11.7057	-0.892029	86.0767	-0.0655946
16.296	175.674	11.7054	-0.891517	86.0747	-0.065557
16.3043	175.759	11.7051	-0.89104	86.0725	-0.0655219
16.3127	175.84	11.7048	-0.890535	86.07	-0.0654848
16.321	175.927	11.7044	-0.890013	86.0675	-0.0654464
16.3293	176.01	11.7041	-0.889518	86.0649	-0.06541
16.3377	176.095	11.7038	-0.889026	86.0627	-0.0653738
16.346	176.178	11.7035	-0.888538	86.0604	-0.065338
16.3543	176.263	11.7032	-0.888077	86.0582	-0.065304
16.3627	176.348	11.7028	-0.887589	86.0559	-0.0652682
16.371	176.432	11.7025	-0.887098	86.0536	-0.065232
16.3793	176.516	11.7022	-0.886641	86.0513	-0.0651985
16.3877	176.602	11.7019	-0.886166	86.0489	-0.0651635
16.396	176.683	11.7016	-0.885699	86.0467	-0.0651292
16.4043	176.766	11.7013	-0.885265	86.0447	-0.0650973
16.4127	176.848	11.701	-0.884804	86.0427	-0.0650634
16.421	176.931	11.7007	-0.884327	86.0403	-0.0650283
16.4293	177.022	11.7004	-0.883872	86.038	-0.0649949
16.4377	177.102	11.7001	-0.883412	86.0356	-0.064961
16.446	177.184	11.6998	-0.88295	86.0334	-0.0649271
16.4543	177.27	11.6994	-0.882492	86.0309	-0.0648934
16.4627	177.354	11.6991	-0.882006	86.0284	-0.0648576
16.471	177.432	11.6988	-0.881522	86.0261	-0.064822
16.4793	177.516	11.6985	-0.881014	86.0239	-0.0647847
16.4877	177.604	11.6982	-0.880512	86.0217	-0.0647478
16.496	177.684	11.6979	-0.880035	86.0196	-0.0647127
16.5043	177.77	11.6976	-0.879586	86.0175	-0.0646797
16.5127	177.849	11.6974	-0.879111	86.0157	-0.0646447
16.521	177.937	11.6971	-0.878633	86.0135	-0.0646096
16.5293	178.023	11.6968	-0.878146	86.0112	-0.0645737
16.5377	178.104	11.6965	-0.877665	86.0092	-0.0645384
16.546	178.19	11.6962	-0.877197	86.0072	-0.064504
16.5543	178.277	11.696	-0.8767	86.0053	-0.0644674
16.5627	178.356	11.6957	-0.876243	86.0032	-0.0644339
16.571	178.44	11.6954	-0.875776	86.0011	-0.0643995
16.5793	178.524	11.6951	-0.875314	85.9989	-0.0643656
16.5877	178.608	11.6948	-0.874849	85.9967	-0.0643313
16.596	178.692	11.6945	-0.874392	85.9943	-0.0642977
16.6043	178.774	11.6942	-0.873946	85.9922	-0.064265
16.6127	178.854	11.6939	-0.873509	85.9903	-0.0642328
16.621	178.942	11.6936	-0.873069	85.9881	-0.0642005
16.6293	179.021	11.6933	-0.872634	85.9861	-0.0641684
16.6377	179.106	11.693	-0.872211	85.9838	-0.0641373
16.646	179.189	11.6927	-0.87177	85.9815	-0.0641049
[truncated: 9,898 more rows]
