# Supplementary material for: Comparative study on mechanisms for improving mechanical properties and microstructure of cement paste modified by different types of nanomaterials
Source: publisher site journal article supplement (doi:10.1515/ntrev-2021-0027), 2021-01-01
Supplement: Supplementary file 16 [file NT-2-1d.xlsx]

## Sheet: Sheet1
Time (min)	Temperature (°C)	Weight (mg)			Temperature Difference (°C/mg)
0.00153333	18.9238	13.2498	-0.725711	100	-0.0547715
0.00433333	18.9239	13.2494	-0.725359	99.997	-0.0547449
0.0126667	18.9224	13.249	-0.725307	99.9938	-0.054741
0.021	18.9279	13.2485	-0.725289	99.9905	-0.0547396
0.0293333	18.9243	13.2481	-0.725232	99.9872	-0.0547354
0.0376667	18.9186	13.2477	-0.725146	99.9842	-0.0547289
0.046	18.9229	13.2473	-0.725059	99.9811	-0.0547223
0.0543333	18.9209	13.2469	-0.724973	99.9783	-0.0547157
0.0626667	18.9266	13.2466	-0.724784	99.9755	-0.0547015
0.071	18.924	13.2462	-0.724629	99.9725	-0.0546898
0.0793333	18.9277	13.2458	-0.72445	99.9695	-0.0546763
0.0876667	18.9311	13.2454	-0.724341	99.9667	-0.0546681
0.096	18.9256	13.245	-0.724178	99.9638	-0.0546558
0.104333	18.9301	13.2447	-0.723981	99.9613	-0.0546409
0.112667	18.9298	13.2443	-0.723815	99.9584	-0.0546284
0.121	18.927	13.2439	-0.723671	99.9555	-0.0546175
0.129333	18.9278	13.2435	-0.723513	99.9526	-0.0546055
0.137667	18.9305	13.2431	-0.723356	99.9495	-0.0545937
0.146	18.9294	13.2427	-0.723271	99.9463	-0.0545873
0.154333	18.9246	13.2423	-0.723185	99.943	-0.0545808
0.162667	18.9321	13.2419	-0.723129	99.9402	-0.0545766
0.171	18.9329	13.2415	-0.723074	99.9376	-0.0545725
0.179333	18.9321	13.2411	-0.723079	99.9346	-0.0545728
0.187667	18.9335	13.2407	-0.723051	99.9313	-0.0545707
0.196	18.9367	13.2402	-0.723031	99.9279	-0.0545692
0.204333	18.9386	13.2399	-0.723027	99.9249	-0.0545689
0.212667	18.9412	13.2395	-0.723062	99.922	-0.0545715
0.221	18.9435	13.2391	-0.723113	99.9189	-0.0545754
0.229333	18.9459	13.2387	-0.723231	99.9162	-0.0545843
0.237667	18.9445	13.2383	-0.723293	99.9134	-0.054589
0.246	18.9468	13.2379	-0.723367	99.9103	-0.0545945
0.254333	18.9517	13.2375	-0.723475	99.9071	-0.0546027
0.262667	18.9578	13.2371	-0.723597	99.9043	-0.0546119
0.271	18.9544	13.2368	-0.723739	99.9018	-0.0546226
0.279333	18.9626	13.2365	-0.723904	99.8995	-0.0546351
0.287667	18.9653	13.2361	-0.724107	99.8969	-0.0546504
0.296	18.9703	13.2358	-0.724323	99.8942	-0.0546667
0.304333	18.9796	13.2354	-0.724545	99.8915	-0.0546835
0.312667	18.9813	13.2351	-0.724729	99.8888	-0.0546974
0.321	18.9875	13.2348	-0.725027	99.8864	-0.0547198
0.329333	18.9955	13.2344	-0.725385	99.8838	-0.0547469
0.337667	18.9937	13.234	-0.725752	99.881	-0.0547745
0.346	19.0035	13.2337	-0.726116	99.8782	-0.054802
0.354333	19.0167	13.2333	-0.726538	99.8752	-0.0548339
0.362667	19.0222	13.2329	-0.726946	99.8724	-0.0548647
0.371	19.0318	13.2325	-0.727371	99.8694	-0.0548968
0.379333	19.0481	13.2321	-0.727825	99.8664	-0.054931
0.387667	19.055	13.2317	-0.728333	99.8634	-0.0549694
0.396	19.0603	13.2313	-0.728865	99.8601	-0.0550095
0.404333	19.0678	13.2308	-0.729392	99.8568	-0.0550493
0.412667	19.0854	13.2304	-0.729929	99.8537	-0.0550898
0.421	19.0926	13.23	-0.730472	99.8507	-0.0551308
0.429333	19.1111	13.2296	-0.731056	99.8478	-0.0551749
0.437667	19.1141	13.2292	-0.731696	99.8448	-0.0552231
0.446	19.1281	13.2288	-0.732402	99.8418	-0.0552764
0.454333	19.1454	13.2284	-0.733106	99.8386	-0.0553296
0.462667	19.1538	13.228	-0.733862	99.8354	-0.0553867
0.471	19.1733	13.2276	-0.734607	99.8325	-0.0554429
0.479333	19.1863	13.2272	-0.73542	99.8298	-0.0555043
0.487667	19.2013	13.2269	-0.736249	99.8269	-0.0555668
0.496	19.2245	13.2265	-0.737082	99.8238	-0.0556297
0.504333	19.2341	13.2261	-0.737961	99.8208	-0.055696
0.512667	19.2533	13.2256	-0.738849	99.8176	-0.055763
0.521	19.2718	13.2252	-0.739777	99.8146	-0.0558331
0.529333	19.2904	13.2248	-0.740747	99.8115	-0.0559063
0.537667	19.3139	13.2244	-0.741703	99.8086	-0.0559784
0.546	19.3346	13.2241	-0.742682	99.8057	-0.0560523
0.554333	19.3521	13.2237	-0.74372	99.8027	-0.0561306
0.562667	19.3741	13.2233	-0.744736	99.7996	-0.0562073
0.571	19.4025	13.2228	-0.74577	99.7966	-0.0562853
0.579333	19.4243	13.2224	-0.746851	99.7934	-0.056367
0.587667	19.4451	13.222	-0.747951	99.79	-0.05645
0.596	19.4681	13.2215	-0.749059	99.7867	-0.0565336
0.604333	19.4956	13.2211	-0.750159	99.7835	-0.0566166
0.612667	19.5188	13.2207	-0.751275	99.7803	-0.0567008
0.621	19.5411	13.2203	-0.752493	99.7773	-0.0567928
0.629333	19.5679	13.2198	-0.753729	99.774	-0.0568861
0.637667	19.5992	13.2194	-0.754955	99.7703	-0.0569786
0.646	19.6268	13.2189	-0.756225	99.7668	-0.0570745
0.654333	19.661	13.2184	-0.757469	99.7633	-0.0571684
0.662667	19.686	13.218	-0.758727	99.7602	-0.0572633
0.671	19.72	13.2176	-0.760038	99.7573	-0.0573623
0.679333	19.7528	13.2172	-0.761399	99.7543	-0.057465
0.687667	19.7892	13.2168	-0.762748	99.7512	-0.0575667
0.696	19.8209	13.2164	-0.764097	99.7482	-0.0576686
0.704333	19.852	13.216	-0.765422	99.7449	-0.0577686
0.712667	19.8821	13.2156	-0.766747	99.7417	-0.0578685
0.721	19.9212	13.2152	-0.768088	99.7387	-0.0579698
0.729333	19.9643	13.2148	-0.769469	99.7355	-0.058074
0.737667	19.9911	13.2143	-0.770925	99.7324	-0.0581839
0.746	20.0292	13.2139	-0.772381	99.7292	-0.0582938
0.754333	20.0651	13.2134	-0.773803	99.7257	-0.0584011
0.762667	20.1097	13.213	-0.775211	99.7221	-0.0585074
0.771	20.1492	13.2125	-0.776672	99.7184	-0.0586177
0.779333	20.1869	13.212	-0.77814	99.7146	-0.0587284
0.787667	20.2232	13.2115	-0.779633	99.7111	-0.0588411
0.796	20.2669	13.2111	-0.781138	99.7078	-0.0589547
0.804333	20.3077	13.2106	-0.782681	99.704	-0.0590711
0.812667	20.3524	13.2101	-0.784227	99.7001	-0.0591878
0.821	20.3992	13.2095	-0.78577	99.6961	-0.0593043
0.829333	20.4482	13.209	-0.787333	99.6921	-0.0594223
0.837667	20.4916	13.2085	-0.788888	99.6881	-0.0595396
0.846	20.5397	13.208	-0.790469	99.6845	-0.0596589
0.854333	20.5788	13.2075	-0.792058	99.6809	-0.0597788
0.862667	20.6318	13.207	-0.793657	99.6773	-0.0598995
0.871	20.6734	13.2066	-0.795263	99.6738	-0.0600207
0.879333	20.7306	13.2061	-0.796873	99.67	-0.0601422
0.887667	20.7843	13.2056	-0.798485	99.6666	-0.0602639
0.896	20.8349	13.2052	-0.800113	99.6633	-0.0603868
0.904333	20.8853	13.2048	-0.80174	99.66	-0.0605096
0.912667	20.9386	13.2043	-0.803388	99.6567	-0.0606339
0.921	20.9835	13.2039	-0.805036	99.6533	-0.0607583
0.929333	21.0382	13.2034	-0.80673	99.6499	-0.0608862
0.937667	21.0925	13.2029	-0.808397	99.6461	-0.061012
0.946	21.1529	13.2024	-0.810072	99.6422	-0.0611384
0.954333	21.2056	13.2019	-0.811752	99.6381	-0.0612652
0.962667	21.2607	13.2013	-0.813425	99.634	-0.0613915
0.971	21.3171	13.2008	-0.815078	99.6299	-0.0615162
0.979333	21.3835	13.2002	-0.816802	99.626	-0.0616464
0.987667	21.4396	13.1998	-0.81852	99.6223	-0.061776
0.996	21.4986	13.1993	-0.820224	99.6187	-0.0619046
1.00433	21.5616	13.1988	-0.821971	99.6151	-0.0620364
1.01267	21.6248	13.1983	-0.823683	99.6114	-0.0621657
1.021	21.6823	13.1978	-0.825391	99.6077	-0.0622946
1.02933	21.7476	13.1973	-0.827178	99.6041	-0.0624295
1.03767	21.813	13.1968	-0.828962	99.6	-0.0625641
1.046	21.8712	13.1963	-0.83077	99.5959	-0.0627006
1.05433	21.9356	13.1957	-0.832606	99.5918	-0.0628391
1.06267	21.999	13.1951	-0.834346	99.5875	-0.0629704
1.071	22.0675	13.1946	-0.836128	99.5831	-0.063105
1.07933	22.1307	13.194	-0.837922	99.5787	-0.0632404
1.08767	22.1983	13.1934	-0.839748	99.5744	-0.0633782
1.096	22.2689	13.1928	-0.841576	99.57	-0.0635162
1.10433	22.3407	13.1923	-0.843444	99.5659	-0.0636571
1.11267	22.4037	13.1918	-0.845288	99.5619	-0.0637963
1.121	22.4734	13.1913	-0.847115	99.5582	-0.0639341
1.12933	22.5494	13.1908	-0.848936	99.5546	-0.0640716
1.13767	22.6091	13.1903	-0.850795	99.5508	-0.0642119
1.146	22.6851	13.1898	-0.852698	99.5468	-0.0643556
1.15433	22.7515	13.1892	-0.854618	99.5426	-0.0645005
1.16267	22.8318	13.1887	-0.85648	99.5386	-0.0646409
1.171	22.9013	13.1881	-0.858366	99.5346	-0.0647833
1.17933	22.9749	13.1876	-0.860305	99.5305	-0.0649297
1.18767	23.0521	13.187	-0.862238	99.5264	-0.0650756
1.196	23.1194	13.1865	-0.864158	99.5221	-0.0652204
1.20433	23.1974	13.1859	-0.866118	99.5179	-0.0653684
1.21267	23.2735	13.1854	-0.868085	99.5137	-0.0655168
1.221	23.3445	13.1848	-0.870048	99.5095	-0.065665
1.22933	23.4215	13.1843	-0.872048	99.5054	-0.0658159
1.23767	23.4978	13.1837	-0.873991	99.5011	-0.0659626
1.246	23.576	13.1831	-0.876032	99.4965	-0.0661166
1.25433	23.6571	13.1824	-0.878074	99.4917	-0.0662707
1.26267	23.7365	13.1818	-0.880093	99.4869	-0.0664231
1.271	23.8159	13.1812	-0.88209	99.482	-0.0665738
1.27933	23.8951	13.1805	-0.884103	99.477	-0.0667257
1.28767	23.9756	13.1798	-0.88614	99.4719	-0.0668795
1.296	24.0544	13.1791	-0.888203	99.4668	-0.0670352
1.30433	24.1417	13.1785	-0.890237	99.4617	-0.0671887
1.31267	24.2139	13.1778	-0.892255	99.457	-0.067341
1.321	24.3068	13.1773	-0.894352	99.4524	-0.0674993
1.32933	24.3861	13.1767	-0.89641	99.4481	-0.0676546
1.33767	24.4745	13.1761	-0.898445	99.4438	-0.0678082
1.346	24.5574	13.1755	-0.900459	99.4395	-0.0679602
1.35433	24.6445	13.175	-0.902541	99.4352	-0.0681173
1.36267	24.7251	13.1744	-0.904624	99.4306	-0.0682746
1.371	24.8092	13.1738	-0.906723	99.4263	-0.0684329
1.37933	24.8946	13.1732	-0.908838	99.4216	-0.0685926
1.38767	24.9829	13.1725	-0.91098	99.417	-0.0687542
1.396	25.067	13.1719	-0.913124	99.4121	-0.0689161
1.40433	25.1534	13.1712	-0.91524	99.4071	-0.0690757
1.41267	25.242	13.1706	-0.91737	99.402	-0.0692365
1.421	25.3335	13.1699	-0.919539	99.3967	-0.0694003
1.42933	25.4184	13.1691	-0.921723	99.3912	-0.069565
1.43767	25.5115	13.1684	-0.923921	99.3859	-0.069731
1.446	25.5923	13.1677	-0.926107	99.3807	-0.0698959
1.45433	25.684	13.167	-0.928308	99.3753	-0.070062
1.46267	25.7721	13.1664	-0.930491	99.3703	-0.0702268
1.471	25.8624	13.1657	-0.932687	99.3653	-0.0703926
1.47933	25.9475	13.1651	-0.934869	99.3606	-0.0705572
1.48767	26.0479	13.1645	-0.937067	99.356	-0.0707231
1.496	26.1356	13.1638	-0.939288	99.3512	-0.0708907
1.50433	26.2242	13.1632	-0.941488	99.3466	-0.0710568
1.51267	26.3147	13.1626	-0.943726	99.342	-0.0712257
1.521	26.4099	13.162	-0.945969	99.3374	-0.0713949
1.52933	26.4977	13.1614	-0.948217	99.3326	-0.0715646
1.53767	26.5875	13.1607	-0.950454	99.3278	-0.0717335
1.546	26.6769	13.1601	-0.952696	99.3226	-0.0719027
1.55433	26.7698	13.1594	-0.954927	99.3174	-0.0720711
1.56267	26.873	13.1587	-0.957214	99.3121	-0.0722437
1.571	26.9582	13.1579	-0.959526	99.3064	-0.0724181
1.57933	27.0544	13.1572	-0.961853	99.3011	-0.0725938
1.58767	27.1433	13.1565	-0.964147	99.2956	-0.0727669
1.596	27.2404	13.1557	-0.966414	99.2902	-0.072938
1.60433	27.3332	13.155	-0.968692	99.2847	-0.0731099
1.61267	27.4273	13.1543	-0.970993	99.2794	-0.0732836
1.621	27.5214	13.1536	-0.973337	99.2739	-0.0734605
1.62933	27.6233	13.1529	-0.975685	99.2687	-0.0736377
1.63767	27.7098	13.1522	-0.978052	99.2631	-0.0738164
1.646	27.8142	13.1514	-0.980414	99.2573	-0.0739946
1.65433	27.8996	13.1507	-0.982748	99.2517	-0.0741708
1.66267	27.9961	13.1498	-0.9851	99.2456	-0.0743483
1.671	28.0848	13.149	-0.987521	99.2394	-0.074531
1.67933	28.1879	13.1482	-0.990025	99.2332	-0.07472
1.68767	28.2801	13.1474	-0.99247	99.227	-0.0749045
1.696	28.383	13.1466	-0.994915	99.2208	-0.0750891
1.70433	28.4795	13.1457	-0.997355	99.2146	-0.0752732
1.71267	28.5682	13.1449	-0.999771	99.2083	-0.0754556
1.721	28.6638	13.1441	-1.00219	99.2021	-0.0756382
1.72933	28.7631	13.1433	-1.0046	99.1959	-0.0758202
1.73767	28.855	13.1425	-1.007	99.1899	-0.0760011
1.746	28.9557	13.1417	-1.00939	99.1841	-0.0761818
1.75433	29.0512	13.1409	-1.01179	99.1783	-0.0763624
1.76267	29.1467	13.1402	-1.01416	99.1725	-0.0765418
1.771	29.2495	13.1394	-1.01658	99.1666	-0.0767245
1.77933	29.3466	13.1386	-1.01903	99.1607	-0.0769092
1.78767	29.4465	13.1378	-1.02143	99.1547	-0.0770902
1.796	29.5372	13.137	-1.02387	99.1486	-0.0772746
1.80433	29.6334	13.1362	-1.0263	99.1426	-0.0774578
1.81267	29.7358	13.1354	-1.02874	99.1364	-0.0776422
1.821	29.8345	13.1345	-1.03122	99.1301	-0.077829
1.82933	29.9364	13.1337	-1.0337	99.1238	-0.0780166
1.83767	30.0308	13.1328	-1.0362	99.1173	-0.0782053
1.846	30.1237	13.1319	-1.03867	99.1103	-0.0783917
1.85433	30.2253	13.131	-1.04115	99.1034	-0.0785784
1.86267	30.325	13.1301	-1.04361	99.0962	-0.0787646
1.871	30.4205	13.1291	-1.04614	99.0893	-0.078955
1.87933	30.5198	13.1282	-1.04863	99.0826	-0.0791435
1.88767	30.621	13.1273	-1.05117	99.0755	-0.079335
1.896	30.7112	13.1264	-1.05371	99.0688	-0.0795269
1.90433	30.8134	13.1256	-1.05628	99.0622	-0.0797204
1.91267	30.904	13.1247	-1.05886	99.0556	-0.0799155
1.921	31.0094	13.1238	-1.06142	99.049	-0.0801085
1.92933	31.1037	13.123	-1.06397	99.0432	-0.0803008
1.93767	31.2011	13.1222	-1.06654	99.0372	-0.080495
1.946	31.2997	13.1214	-1.06913	99.0312	-0.0806899
1.95433	31.3987	13.1206	-1.0717	99.0248	-0.0808845
1.96267	31.4977	13.1197	-1.07425	99.0184	-0.0810771
1.971	31.5969	13.1189	-1.07685	99.0121	-0.0812733
1.97933	31.6882	13.118	-1.07943	99.0055	-0.0814673
1.98767	31.7923	13.1171	-1.08202	98.9988	-0.0816631
1.996	31.8873	13.1162	-1.08462	98.9918	-0.0818593
2.00433	31.9875	13.1153	-1.08723	98.9848	-0.0820563
2.01267	32.0845	13.1143	-1.08982	98.9775	-0.0822517
2.021	32.1756	13.1134	-1.0924	98.9705	-0.0824465
2.02933	32.283	13.1125	-1.09495	98.9634	-0.0826388
2.03767	32.3796	13.1115	-1.09751	98.9564	-0.0828321
2.046	32.4793	13.1106	-1.10011	98.9496	-0.0830283
2.05433	32.575	13.1097	-1.10268	98.9426	-0.0832224
2.06267	32.6714	13.1087	-1.10531	98.9352	-0.0834207
2.071	32.7709	13.1078	-1.10791	98.928	-0.0836169
2.07933	32.8664	13.1068	-1.11047	98.9206	-0.0838103
2.08767	32.9649	13.1058	-1.11307	98.9131	-0.0840066
2.096	33.0582	13.1048	-1.1157	98.9056	-0.0842047
2.10433	33.1596	13.1037	-1.11832	98.8977	-0.0844029
2.11267	33.2533	13.1027	-1.12098	98.8898	-0.0846032
2.121	33.3491	13.1016	-1.12359	98.8818	-0.0848005
2.12933	33.4485	13.1006	-1.12626	98.8737	-0.0850017
2.13767	33.5436	13.0995	-1.12891	98.8656	-0.0852021
2.146	33.637	13.0985	-1.13154	98.8579	-0.0854007
2.15433	33.736	13.0975	-1.13418	98.8504	-0.0856002
2.16267	33.8329	13.0965	-1.13682	98.8429	-0.0857993
2.171	33.9332	13.0955	-1.13946	98.8354	-0.0859987
2.17933	34.0297	13.0945	-1.14207	98.8281	-0.0861953
2.18767	34.1204	13.0935	-1.14471	98.8206	-0.0863947
2.196	34.2185	13.0925	-1.14735	98.813	-0.0865934
2.20433	34.3147	13.0915	-1.15003	98.8056	-0.0867961
2.21267	34.4126	13.0905	-1.15269	98.7979	-0.0869966
2.221	34.5045	13.0895	-1.15535	98.7901	-0.0871978
2.22933	34.5988	13.0884	-1.15802	98.7818	-0.0873993
2.23767	34.6931	13.0873	-1.16068	98.7733	-0.0876002
2.246	34.7903	13.0861	-1.16332	98.7648	-0.0877994
2.25433	34.8903	13.085	-1.16595	98.7564	-0.0879972
2.26267	34.9776	13.0839	-1.16867	98.7476	-0.0882028
2.271	35.0776	13.0827	-1.17136	98.7391	-0.0884062
2.27933	35.1737	13.0816	-1.17407	98.7307	-0.0886105
2.28767	35.2704	13.0805	-1.17674	98.7222	-0.0888122
2.296	35.3625	13.0794	-1.17942	98.7139	-0.0890139
2.30433	35.4569	13.0783	-1.18209	98.7057	-0.0892161
2.31267	35.5472	13.0772	-1.18477	98.6976	-0.0894177
2.321	35.6465	13.0762	-1.18746	98.6896	-0.0896207
2.32933	35.7436	13.0751	-1.19018	98.6815	-0.089826
2.33767	35.8327	13.074	-1.19286	98.6735	-0.0900288
2.346	35.9254	13.073	-1.19549	98.6655	-0.0902267
2.35433	36.0202	13.0719	-1.19813	98.6575	-0.0904266
2.36267	36.1048	13.0709	-1.20082	98.6494	-0.0906291
2.371	36.2061	13.0697	-1.20349	98.641	-0.0908311
2.37933	36.3007	13.0686	-1.20621	98.6324	-0.0910358
2.38767	36.3993	13.0674	-1.20885	98.6238	-0.0912354
2.396	36.4818	13.0663	-1.21153	98.6155	-0.0914373
2.40433	36.5774	13.0652	-1.21418	98.6071	-0.0916379
2.41267	36.67	13.0641	-1.21687	98.5987	-0.0918404
2.421	36.7592	13.063	-1.21961	98.5902	-0.0920473
2.42933	36.8574	13.0618	-1.22237	98.5814	-0.0922558
2.43767	36.9466	13.0607	-1.22506	98.5724	-0.0924587
2.446	37.0375	13.0595	-1.22772	98.5635	-0.0926597
2.45433	37.1255	13.0583	-1.23043	98.5545	-0.0928637
2.46267	37.2257	13.0571	-1.23308	98.5458	-0.0930643
2.471	37.3132	13.056	-1.23574	98.5372	-0.0932648
2.47933	37.4068	13.0548	-1.23836	98.5282	-0.0934629
2.48767	37.4961	13.0535	-1.24104	98.5188	-0.0936648
2.496	37.5833	13.0523	-1.2437	98.5095	-0.0938654
2.50433	37.6781	13.0511	-1.24634	98.5001	-0.0940651
2.51267	37.7659	13.0498	-1.24898	98.4909	-0.0942641
2.521	37.8601	13.0486	-1.25164	98.4817	-0.0944652
2.52933	37.945	13.0474	-1.2543	98.4727	-0.0946657
2.53767	38.04	13.0463	-1.25694	98.4638	-0.0948652
2.546	38.1265	13.0451	-1.25962	98.455	-0.0950672
2.55433	38.2203	13.0439	-1.26235	98.446	-0.0952733
2.56267	38.3066	13.0427	-1.26507	98.437	-0.0954788
2.571	38.3971	13.0415	-1.26774	98.4279	-0.0956799
2.57933	38.4923	13.0403	-1.27039	98.419	-0.0958801
2.58767	38.5727	13.0391	-1.27305	98.4101	-0.0960806
2.596	38.662	13.0379	-1.27572	98.401	-0.0962821
2.60433	38.7572	13.0367	-1.27844	98.392	-0.0964873
2.61267	38.8382	13.0355	-1.28113	98.3826	-0.0966904
2.621	38.9292	13.0343	-1.28379	98.3733	-0.0968913
2.62933	39.0203	13.033	-1.28642	98.3638	-0.09709
2.63767	39.1082	13.0318	-1.28909	98.3545	-0.0972914
2.646	39.1919	13.0305	-1.29176	98.345	-0.0974929
2.65433	39.2775	13.0292	-1.29444	98.3354	-0.0976952
2.66267	39.3633	13.028	-1.29712	98.3256	-0.0978973
2.671	39.4584	13.0267	-1.29979	98.3159	-0.0980986
2.67933	39.5455	13.0254	-1.30245	98.3062	-0.0982996
2.68767	39.6298	13.0241	-1.30507	98.2963	-0.0984976
2.696	39.7191	13.0228	-1.30776	98.2865	-0.0987002
2.70433	39.8043	13.0215	-1.3104	98.2769	-0.0988993
2.71267	39.8955	13.0202	-1.31304	98.2673	-0.0990989
2.721	39.982	13.0189	-1.31565	98.2576	-0.099296
2.72933	40.0653	13.0177	-1.31827	98.2481	-0.0994935
2.73767	40.1498	13.0165	-1.32088	98.2388	-0.0996905
2.746	40.2358	13.0152	-1.3235	98.2296	-0.0998879
2.75433	40.3266	13.014	-1.32607	98.2204	-0.100082
2.76267	40.4085	13.0128	-1.32866	98.2109	-0.100278
2.771	40.4944	13.0115	-1.33127	98.2016	-0.100474
2.77933	40.5784	13.0103	-1.33381	98.1925	-0.100666
2.78767	40.667	13.009	-1.33641	98.1829	-0.100863
2.796	40.7507	13.0077	-1.339	98.1732	-0.101058
2.80433	40.831	13.0065	-1.34158	98.1634	-0.101253
2.81267	40.9199	13.0052	-1.34415	98.1536	-0.101447
2.821	41.0056	13.0038	-1.34667	98.1435	-0.101637
2.82933	41.0941	13.0025	-1.34921	98.1334	-0.101829
2.83767	41.1707	13.0011	-1.35177	98.123	-0.102022
2.846	41.258	12.9998	-1.35432	98.1128	-0.102214
2.85433	41.3442	12.9984	-1.35683	98.1026	-0.102404
2.86267	41.4311	12.997	-1.35932	98.0923	-0.102591
2.871	41.5129	12.9957	-1.36178	98.0822	-0.102778
2.87933	41.5949	12.9944	-1.36426	98.0723	-0.102965
2.88767	41.6805	12.9931	-1.36671	98.0624	-0.103149
2.896	41.7613	12.9918	-1.36918	98.0526	-0.103336
2.90433	41.8464	12.9905	-1.37167	98.0431	-0.103524
2.91267	41.9316	12.9892	-1.37413	98.0333	-0.103709
2.921	42.0133	12.988	-1.37657	98.0238	-0.103893
2.92933	42.0963	12.9867	-1.37895	98.0142	-0.104073
2.93767	42.1751	12.9854	-1.38137	98.0046	-0.104256
2.946	42.2592	12.9841	-1.38376	97.9949	-0.104436
2.95433	42.3474	12.9828	-1.38615	97.985	-0.104617
2.96267	42.4217	12.9815	-1.3885	97.9751	-0.104794
2.971	42.5108	12.9802	-1.39087	97.965	-0.104973
2.97933	42.5849	12.9788	-1.39324	97.9546	-0.105152
2.98767	42.6739	12.9775	-1.39557	97.9446	-0.105327
2.996	42.7521	12.9762	-1.39788	97.9347	-0.105502
3.00433	42.8377	12.9748	-1.40017	97.9248	-0.105675
3.01267	42.9223	12.9735	-1.40243	97.9148	-0.105846
3.021	43.0034	12.9722	-1.40466	97.9049	-0.106014
3.02933	43.0813	12.9709	-1.40692	97.8948	-0.106184
3.03767	43.1614	12.9696	-1.40915	97.8849	-0.106353
3.046	43.2446	12.9682	-1.41139	97.8748	-0.106521
3.05433	43.3232	12.9669	-1.41355	97.865	-0.106684
3.06267	43.399	12.9656	-1.41568	97.8551	-0.106846
3.071	43.4785	12.9643	-1.4178	97.8453	-0.107005
3.07933	43.5645	12.963	-1.41988	97.8354	-0.107163
3.08767	43.643	12.9617	-1.42198	97.8256	-0.107321
3.096	43.7272	12.9604	-1.42409	97.8158	-0.10748
3.10433	43.8117	12.9591	-1.42615	97.806	-0.107636
3.11267	43.8922	12.9578	-1.42816	97.7963	-0.107788
3.121	43.9724	12.9565	-1.43014	97.7865	-0.107937
3.12933	44.0492	12.9552	-1.43214	97.7768	-0.108088
3.13767	44.1266	12.954	-1.43413	97.7671	-0.108238
3.146	44.2118	12.9527	-1.43602	97.7574	-0.10838
3.15433	44.2868	12.9514	-1.43793	97.7478	-0.108525
3.16267	44.3662	12.9501	-1.4398	97.738	-0.108666
3.171	44.4423	12.9488	-1.44163	97.728	-0.108804
3.17933	44.5255	12.9474	-1.44341	97.7181	-0.108938
3.18767	44.6036	12.9461	-1.4452	97.7083	-0.109073
3.196	44.687	12.9449	-1.44703	97.6985	-0.109212
3.20433	44.7614	12.9436	-1.44883	97.6889	-0.109347
3.21267	44.8402	12.9423	-1.45053	97.6792	-0.109476
3.221	44.9251	12.941	-1.45222	97.6695	-0.109603
3.22933	44.9985	12.9397	-1.45395	97.6599	-0.109734
3.23767	45.0812	12.9384	-1.45562	97.6501	-0.10986
3.246	45.1617	12.9372	-1.45732	97.6406	-0.109988
3.25433	45.236	12.9359	-1.45898	97.6312	-0.110114
3.26267	45.315	12.9347	-1.4606	97.6218	-0.110236
3.271	45.3961	12.9334	-1.46223	97.6123	-0.110359
3.27933	45.476	12.9322	-1.46376	97.6027	-0.110474
3.28767	45.5502	12.9309	-1.46523	97.5932	-0.110585
3.296	45.63	12.9297	-1.46675	97.5837	-0.1107
3.30433	45.7162	12.9284	-1.4682	97.5743	-0.110809
3.31267	45.7874	12.9271	-1.46962	97.5649	-0.110916
3.321	45.8724	12.9259	-1.47102	97.5556	-0.111022
3.32933	45.9449	12.9247	-1.47233	97.5462	-0.111121
3.33767	46.021	12.9234	-1.47364	97.5367	-0.11122
3.346	46.098	12.9222	-1.47495	97.5274	-0.111318
3.35433	46.18	12.921	-1.47616	97.5182	-0.11141
3.36267	46.2576	12.9198	-1.47742	97.509	-0.111505
3.371	46.3376	12.9185	-1.47869	97.5	-0.111601
3.37933	46.4192	12.9173	-1.47987	97.4907	-0.11169
3.38767	46.4952	12.9161	-1.48104	97.4815	-0.111779
3.396	46.5745	12.9149	-1.48218	97.4722	-0.111864
3.40433	46.6428	12.9137	-1.48331	97.463	-0.111949
3.41267	46.7235	12.9124	-1.48446	97.4538	-0.112037
3.421	46.8007	12.9112	-1.48554	97.4448	-0.112118
3.42933	46.8841	12.91	-1.48656	97.4356	-0.112195
3.43767	46.9647	12.9088	-1.48759	97.4263	-0.112273
3.446	47.0403	12.9076	-1.48855	97.4172	-0.112345
3.45433	47.1175	12.9063	-1.48947	97.4079	-0.112414
3.46267	47.1932	12.9052	-1.49038	97.399	-0.112483
3.471	47.2636	12.904	-1.49129	97.3902	-0.112552
3.47933	47.3462	12.9029	-1.49217	97.3817	-0.112618
3.48767	47.4244	12.9017	-1.49299	97.3732	-0.11268
3.496	47.5	12.9006	-1.49377	97.3643	-0.112739
3.50433	47.5816	12.8994	-1.49452	97.3554	-0.112796
3.51267	47.6608	12.8982	-1.49532	97.3467	-0.112856
3.521	47.737	12.8971	-1.49604	97.3381	-0.11291
3.52933	47.8166	12.8959	-1.49673	97.3294	-0.112962
3.53767	47.8895	12.8948	-1.49737	97.3208	-0.113011
3.546	47.9704	12.8937	-1.498	97.3122	-0.113058
3.55433	48.0507	12.8925	-1.4986	97.3035	-0.113104
3.56267	48.1232	12.8914	-1.49919	97.2948	-0.113148
3.571	48.2002	12.8902	-1.49979	97.2863	-0.113193
3.57933	48.2773	12.8891	-1.50032	97.2778	-0.113233
3.58767	48.3573	12.888	-1.50084	97.2695	-0.113272
3.596	48.4376	12.8869	-1.50128	97.2611	-0.113306
3.60433	48.5036	12.8858	-1.50171	97.2526	-0.113339
3.61267	48.585	12.8847	-1.50217	97.2445	-0.113373
3.621	48.6668	12.8836	-1.50264	97.236	-0.113409
3.62933	48.7388	12.8825	-1.50304	97.2277	-0.113439
3.63767	48.8185	12.8814	-1.50339	97.2194	-0.113465
3.646	48.8995	12.8802	-1.50371	97.2108	-0.113489
3.65433	48.9699	12.8791	-1.50397	97.2022	-0.113509
3.66267	49.0486	12.878	-1.50427	97.1938	-0.113532
3.671	49.1242	12.8769	-1.50457	97.1855	-0.113554
3.67933	49.2035	12.8758	-1.50482	97.1773	-0.113573
3.68767	49.2812	12.8747	-1.50505	97.169	-0.11359
3.696	49.3639	12.8736	-1.50521	97.1608	-0.113602
3.70433	49.4357	12.8725	-1.50533	97.1527	-0.113612
3.71267	49.5141	12.8715	-1.50548	97.1446	-0.113623
3.721	49.5929	12.8704	-1.50561	97.1364	-0.113633
3.72933	49.6667	12.8693	-1.50573	97.1283	-0.113642
3.73767	49.7491	12.8683	-1.50585	97.1204	-0.113651
3.746	49.8249	12.8672	-1.50591	97.1124	-0.113655
3.75433	49.9057	12.8661	-1.50597	97.1043	-0.11366
3.76267	49.9739	12.8651	-1.506	97.0965	-0.113662
3.771	50.057	12.8641	-1.50604	97.0886	-0.113665
3.77933	50.132	12.863	-1.5061	97.0806	-0.11367
3.78767	50.2121	12.8619	-1.50612	97.0726	-0.113671
3.796	50.2929	12.8609	-1.50608	97.0649	-0.113668
3.80433	50.3652	12.8599	-1.50606	97.0572	-0.113666
3.81267	50.441	12.8589	-1.50603	97.0495	-0.113664
3.821	50.5173	12.8578	-1.50595	97.0418	-0.113658
3.82933	50.5983	12.8568	-1.50585	97.0342	-0.113651
3.83767	50.6698	12.8559	-1.50572	97.0267	-0.113641
3.846	50.748	12.8548	-1.50562	97.0191	-0.113634
3.85433	50.828	12.8538	-1.50545	97.0115	-0.113621
3.86267	50.9087	12.8528	-1.50523	97.0039	-0.113604
3.871	50.9886	12.8518	-1.50502	96.9963	-0.113588
3.87933	51.0586	12.8508	-1.50483	96.9887	-0.113574
3.88767	51.1405	12.8498	-1.50456	96.981	-0.113554
3.896	51.2165	12.8488	-1.50427	96.9735	-0.113532
3.90433	51.2942	12.8478	-1.50402	96.9658	-0.113513
3.91267	51.3762	12.8468	-1.50374	96.9581	-0.113492
3.921	51.4492	12.8458	-1.50344	96.9505	-0.113469
3.92933	51.5305	12.8447	-1.50312	96.9429	-0.113444
3.93767	51.6014	12.8437	-1.50282	96.9353	-0.113422
3.946	51.6823	12.8427	-1.50255	96.9278	-0.113401
3.95433	51.7611	12.8418	-1.50222	96.9206	-0.113377
3.96267	51.8371	12.8408	-1.50188	96.9132	-0.113351
3.971	51.9162	12.8399	-1.50155	96.906	-0.113327
3.97933	51.9882	12.8389	-1.50121	96.8987	-0.113301
3.98767	52.0671	12.8379	-1.50084	96.8914	-0.113273
3.996	52.1487	12.8369	-1.50049	96.8841	-0.113246
4.00433	52.2262	12.836	-1.50005	96.8767	-0.113213
4.01267	52.3066	12.835	-1.49964	96.8696	-0.113182
4.021	52.3893	12.8341	-1.49925	96.8625	-0.113152
4.02933	52.4612	12.8332	-1.49878	96.8555	-0.113117
4.03767	52.5398	12.8322	-1.49834	96.8483	-0.113084
4.046	52.6158	12.8312	-1.49787	96.841	-0.113048
4.05433	52.6939	12.8303	-1.4974	96.8338	-0.113013
4.06267	52.7753	12.8293	-1.49693	96.8264	-0.112977
4.071	52.8481	12.8283	-1.49643	96.8191	-0.11294
4.07933	52.9231	12.8274	-1.49592	96.812	-0.112901
4.08767	52.9977	12.8265	-1.49544	96.8051	-0.112865
4.096	53.0807	12.8255	-1.4949	96.7981	-0.112824
4.10433	53.1671	12.8246	-1.49438	96.791	-0.112785
4.11267	53.24	12.8237	-1.49391	96.7838	-0.11275
4.121	53.319	12.8227	-1.49342	96.7766	-0.112713
4.12933	53.398	12.8218	-1.4929	96.7696	-0.112674
4.13767	53.4755	12.8208	-1.49235	96.7625	-0.112632
4.146	53.5566	12.82	-1.49179	96.7559	-0.11259
4.15433	53.6361	12.8191	-1.49122	96.7491	-0.112547
4.16267	53.7123	12.8181	-1.49066	96.742	-0.112504
4.171	53.7902	12.8172	-1.49009	96.735	-0.112461
4.17933	53.8735	12.8163	-1.48952	96.728	-0.112418
4.18767	53.9515	12.8154	-1.48889	96.7213	-0.112371
4.196	54.0316	12.8145	-1.48826	96.7144	-0.112323
4.20433	54.1073	12.8136	-1.48762	96.7076	-0.112275
4.21267	54.1879	12.8127	-1.48699	96.7008	-0.112227
4.221	54.2716	12.8118	-1.48639	96.694	-0.112182
4.22933	54.3415	12.8109	-1.48576	96.6872	-0.112135
4.23767	54.4255	12.81	-1.48514	96.6805	-0.112088
4.246	54.5102	12.8091	-1.48445	96.6738	-0.112036
4.25433	54.5824	12.8082	-1.48383	96.6671	-0.111989
4.26267	54.6579	12.8073	-1.48318	96.6603	-0.11194
4.271	54.7372	12.8064	-1.48253	96.6534	-0.111891
4.27933	54.82	12.8055	-1.48184	96.6469	-0.111838
4.28767	54.9029	12.8046	-1.48114	96.6402	-0.111786
4.296	54.9754	12.8038	-1.48049	96.6335	-0.111737
4.30433	55.0657	12.8029	-1.47982	96.6269	-0.111686
4.31267	55.1385	12.802	-1.47912	96.6202	-0.111633
4.321	55.2238	12.8011	-1.47841	96.6135	-0.11158
4.32933	55.2955	12.8002	-1.47776	96.6068	-0.111531
4.33767	55.3769	12.7993	-1.47704	96.6003	-0.111476
4.346	55.4635	12.7985	-1.47635	96.5936	-0.111424
4.35433	55.5408	12.7976	-1.47563	96.587	-0.11137
4.36267	55.6206	12.7967	-1.47495	96.5803	-0.111318
4.371	55.6979	12.7958	-1.47425	96.5738	-0.111266
4.37933	55.779	12.795	-1.47351	96.5673	-0.11121
4.38767	55.8601	12.7941	-1.4728	96.561	-0.111156
4.396	55.9439	12.7933	-1.47209	96.5546	-0.111103
4.40433	56.0225	12.7924	-1.47139	96.5482	-0.11105
4.41267	56.1002	12.7916	-1.47065	96.5418	-0.110994
4.421	56.1805	12.7907	-1.46992	96.5352	-0.110939
4.42933	56.2654	12.7899	-1.46918	96.5288	-0.110883
4.43767	56.3371	12.789	-1.46845	96.5225	-0.110828
4.446	56.4194	12.7882	-1.46768	96.5162	-0.11077
4.45433	56.5063	12.7874	-1.46694	96.5098	-0.110714
4.46267	56.5803	12.7865	-1.46622	96.5036	-0.11066
4.471	56.662	12.7857	-1.46543	96.4972	-0.1106
4.47933	56.7412	12.7848	-1.46465	96.4908	-0.110541
4.48767	56.8284	12.784	-1.46386	96.4845	-0.110482
4.496	56.9068	12.7831	-1.4631	96.4781	-0.110425
4.50433	56.9854	12.7823	-1.46236	96.4719	-0.110369
4.51267	57.0681	12.7815	-1.46161	96.4655	-0.110312
4.521	57.1445	12.7806	-1.46082	96.4592	-0.110252
4.52933	57.2292	12.7798	-1.46004	96.4528	-0.110193
4.53767	57.3106	12.779	-1.45922	96.4464	-0.110131
4.546	57.3893	12.7781	-1.45842	96.4399	-0.110071
4.55433	57.4746	12.7772	-1.45766	96.4335	-0.110014
4.56267	57.5571	12.7764	-1.45688	96.4271	-0.109955
4.571	57.6388	12.7756	-1.45607	96.4208	-0.109894
4.57933	57.72	12.7747	-1.45528	96.4145	-0.109834
4.58767	57.7997	12.7739	-1.45445	96.4081	-0.109771
4.596	57.882	12.773	-1.45364	96.4018	-0.10971
4.60433	57.9602	12.7722	-1.45287	96.3955	-0.109652
4.61267	58.0435	12.7714	-1.45207	96.3894	-0.109592
4.621	58.125	12.7706	-1.45129	96.3833	-0.109533
4.62933	58.2025	12.7698	-1.45046	96.3772	-0.109471
4.63767	58.2856	12.769	-1.44968	96.3712	-0.109412
4.646	58.3705	12.7682	-1.44894	96.365	-0.109356
4.65433	58.4554	12.7674	-1.44818	96.3588	-0.109298
4.66267	58.5303	12.7666	-1.4474	96.3529	-0.109239
4.671	58.6129	12.7658	-1.44662	96.3467	-0.109181
4.67933	58.6927	12.765	-1.44583	96.3408	-0.109121
4.68767	58.7808	12.7642	-1.44502	96.3347	-0.10906
4.696	58.8577	12.7633	-1.44426	96.3284	-0.109002
4.70433	58.9393	12.7625	-1.4435	96.3224	-0.108945
4.71267	59.0211	12.7617	-1.44274	96.3163	-0.108888
4.721	59.1014	12.7609	-1.44196	96.3104	-0.108829
4.72933	59.1887	12.7601	-1.44114	96.3042	-0.108767
4.73767	59.2686	12.7593	-1.44036	96.2981	-0.108708
4.746	59.3458	12.7585	-1.43957	96.292	-0.108648
4.75433	59.4337	12.7577	-1.43879	96.286	-0.108589
4.76267	59.5128	12.7569	-1.43804	96.2798	-0.108533
4.771	59.601	12.7561	-1.43733	96.2736	-0.108479
4.77933	59.6834	12.7553	-1.43658	96.2676	-0.108423
4.78767	59.7641	12.7545	-1.43584	96.2615	-0.108367
4.796	59.8452	12.7537	-1.4351	96.2555	-0.108311
4.80433	59.9269	12.7528	-1.4344	96.2492	-0.108258
4.81267	60.0144	12.752	-1.4337	96.2432	-0.108205
4.821	60.0915	12.7512	-1.43299	96.2372	-0.108152
4.82933	60.1827	12.7504	-1.43232	96.231	-0.108101
4.83767	60.2573	12.7496	-1.43162	96.225	-0.108048
4.846	60.34	12.7488	-1.43091	96.2191	-0.107995
4.85433	60.4278	12.7481	-1.4302	96.2132	-0.107941
4.86267	60.5145	12.7473	-1.42952	96.2073	-0.10789
4.871	60.5937	12.7465	-1.42884	96.2012	-0.107838
4.87933	60.679	12.7457	-1.42819	96.1951	-0.107789
4.88767	60.7595	12.7449	-1.4275	96.1892	-0.107738
4.896	60.8432	12.7441	-1.42684	96.183	-0.107687
4.90433	60.9268	12.7433	-1.42622	96.177	-0.10764
4.91267	61.016	12.7424	-1.42555	96.1709	-0.107591
4.921	61.0909	12.7416	-1.42493	96.1648	-0.107543
4.92933	61.1803	12.7409	-1.42434	96.1588	-0.107499
4.93767	61.2644	12.7401	-1.42373	96.1529	-0.107453
4.946	61.3474	12.7393	-1.42311	96.147	-0.107406
4.95433	61.4288	12.7385	-1.42249	96.1411	-0.107359
4.96267	61.5054	12.7377	-1.4219	96.135	-0.107315
4.971	61.5908	12.7369	-1.42132	96.129	-0.107271
4.97933	61.6793	12.7361	-1.42076	96.123	-0.107229
4.98767	61.7596	12.7353	-1.4202	96.117	-0.107187
4.996	61.8448	12.7345	-1.41971	96.111	-0.107149
5.00433	61.9329	12.7337	-1.41917	96.1051	-0.107109
5.01267	62.0129	12.7329	-1.41866	96.099	-0.10707
5.021	62.1016	12.7321	-1.41817	96.0928	-0.107033
5.02933	62.1833	12.7313	-1.41768	96.0865	-0.106996
5.03767	62.2699	12.7304	-1.41724	96.0803	-0.106963
5.046	62.3528	12.7297	-1.41673	96.0744	-0.106925
5.05433	62.4346	12.7288	-1.41626	96.0682	-0.106889
5.06267	62.5159	12.728	-1.41581	96.0621	-0.106855
5.071	62.6012	12.7272	-1.41532	96.0559	-0.106818
5.07933	62.6856	12.7264	-1.41484	96.0498	-0.106782
5.08767	62.771	12.7256	-1.41442	96.0436	-0.10675
5.096	62.8524	12.7248	-1.41402	96.0374	-0.10672
5.10433	62.9397	12.724	-1.41365	96.0313	-0.106692
5.11267	63.0201	12.7231	-1.41331	96.0251	-0.106667
5.121	63.1081	12.7223	-1.41295	96.0189	-0.106639
5.12933	63.1848	12.7214	-1.41265	96.0123	-0.106617
5.13767	63.2699	12.7206	-1.41236	96.006	-0.106595
5.146	63.3558	12.7197	-1.41208	95.9996	-0.106573
5.15433	63.442	12.7189	-1.41184	95.9933	-0.106555
5.16267	63.5187	12.7181	-1.41162	95.987	-0.106539
5.171	63.605	12.7172	-1.41139	95.9805	-0.106522
5.17933	63.6919	12.7164	-1.41113	95.974	-0.106502
5.18767	63.7773	12.7155	-1.41093	95.9674	-0.106487
5.196	63.8522	12.7146	-1.41074	95.961	-0.106472
5.20433	63.9444	12.7138	-1.41058	95.9547	-0.106461
5.21267	64.0235	12.713	-1.41041	95.9484	-0.106448
5.221	64.1126	12.7121	-1.41027	95.9418	-0.106437
5.22933	64.1913	12.7113	-1.41011	95.9355	-0.106425
5.23767	64.2779	12.7104	-1.41002	95.9289	-0.106418
5.246	64.3658	12.7095	-1.40995	95.9224	-0.106413
5.25433	64.4522	12.7087	-1.40991	95.9159	-0.10641
5.26267	64.5322	12.7078	-1.4099	95.9095	-0.106409
5.271	64.624	12.707	-1.40987	95.903	-0.106407
5.27933	64.7048	12.7061	-1.40984	95.8965	-0.106405
5.28767	64.7854	12.7052	-1.40982	95.8899	-0.106403
5.296	64.8696	12.7043	-1.4099	95.8833	-0.106409
5.30433	64.9562	12.7035	-1.40998	95.8765	-0.106415
5.31267	65.0417	12.7026	-1.41009	95.8698	-0.106423
5.321	65.1298	12.7017	-1.4102	95.8633	-0.106432
5.32933	65.2138	12.7008	-1.4103	95.8567	-0.106439
5.33767	65.2961	12.7	-1.41044	95.8502	-0.10645
5.346	65.3824	12.699	-1.41057	95.8433	-0.10646
5.35433	65.4624	12.6981	-1.41074	95.8363	-0.106472
5.36267	65.5483	12.6972	-1.41095	95.8294	-0.106489
5.371	65.6298	12.6963	-1.41119	95.8223	-0.106507
5.37933	65.7183	12.6953	-1.41137	95.8154	-0.10652
5.38767	65.8014	12.6944	-1.4116	95.8085	-0.106538
5.396	65.8836	12.6935	-1.41186	95.8016	-0.106557
5.40433	65.9669	12.6926	-1.41211	95.7947	-0.106576
5.41267	66.0501	12.6916	-1.4124	95.7874	-0.106598
5.421	66.1353	12.6907	-1.4127	95.7801	-0.10662
5.42933	66.2163	12.6898	-1.41305	95.7732	-0.106647
5.43767	66.3047	12.6888	-1.41343	95.7663	-0.106676
5.446	66.3854	12.6879	-1.4138	95.7594	-0.106703
5.45433	66.4682	12.687	-1.41423	95.7526	-0.106736
5.46267	66.5549	12.6861	-1.41468	95.7454	-0.10677
5.471	66.6406	12.6852	-1.41513	95.7387	-0.106804
5.47933	66.7266	12.6843	-1.41559	95.7317	-0.106839
5.48767	66.8118	12.6833	-1.41605	95.7247	-0.106874
5.496	66.8913	12.6824	-1.41656	95.7175	-0.106912
5.50433	66.9785	12.6814	-1.41707	95.7105	-0.10695
5.51267	67.0637	12.6805	-1.41762	95.7033	-0.106991
5.521	67.1498	12.6796	-1.41815	95.6962	-0.107032
5.52933	67.2326	12.6786	-1.41867	95.6891	-0.107071
5.53767	67.3216	12.6777	-1.41919	95.682	-0.10711
5.546	67.4008	12.6767	-1.41973	95.6749	-0.107151
5.55433	67.4828	12.6757	-1.42028	95.6674	-0.107193
5.56267	67.5676	12.6748	-1.42083	95.66	-0.107234
5.571	67.6572	12.6738	-1.42144	95.6525	-0.10728
5.57933	67.7434	12.6728	-1.42203	95.6452	-0.107325
5.58767	67.8281	12.6718	-1.42263	95.6379	-0.10737
5.596	67.9106	12.6709	-1.4232	95.6306	-0.107413
5.60433	67.9921	12.6699	-1.42379	95.6232	-0.107458
5.61267	68.0768	12.6689	-1.42443	95.6156	-0.107506
5.621	68.1652	12.6679	-1.42505	95.6079	-0.107552
5.62933	68.2514	12.6668	-1.4257	95.6002	-0.107602
5.63767	68.3364	12.6659	-1.42639	95.5928	-0.107654
5.646	68.4167	12.6649	-1.42705	95.5854	-0.107703
5.65433	68.4991	12.6639	-1.42771	95.5779	-0.107754
5.66267	68.588	12.6629	-1.42841	95.5704	-0.107806
5.671	68.6688	12.6619	-1.42913	95.563	-0.10786
5.67933	68.7589	12.6609	-1.42983	95.5555	-0.107913
5.68767	68.8453	12.6599	-1.43054	95.5479	-0.107967
5.696	68.9307	12.6589	-1.43127	95.5403	-0.108022
5.70433	69.0165	12.6579	-1.43204	95.5328	-0.10808
5.71267	69.0971	12.6569	-1.43279	95.5255	-0.108137
5.721	69.1818	12.6559	-1.4335	95.5178	-0.10819
5.72933	69.2651	12.6549	-1.43426	95.5102	-0.108248
5.73767	69.3488	12.6539	-1.43501	95.5025	-0.108304
5.746	69.4396	12.6529	-1.43573	95.4949	-0.108358
5.75433	69.5181	12.6519	-1.43648	95.4872	-0.108415
5.76267	69.6038	12.6508	-1.43725	95.4795	-0.108473
5.771	69.6875	12.6498	-1.43802	95.4717	-0.108531
5.77933	69.7753	12.6488	-1.43884	95.4641	-0.108593
5.78767	69.8534	12.6478	-1.4396	95.4564	-0.108651
5.796	69.9401	12.6468	-1.44036	95.4486	-0.108708
5.80433	70.0229	12.6457	-1.44114	95.4409	-0.108767
5.81267	70.1118	12.6447	-1.44193	95.4333	-0.108826
5.821	70.1941	12.6437	-1.44271	95.4257	-0.108885
5.82933	70.2777	12.6427	-1.44352	95.418	-0.108947
5.83767	70.3655	12.6417	-1.44432	95.4104	-0.109007
5.846	70.4457	12.6406	-1.44513	95.4025	-0.109068
5.85433	70.5364	12.6396	-1.44594	95.3945	-0.109129
5.86267	70.6187	12.6385	-1.44673	95.3866	-0.109189
5.871	70.703	12.6375	-1.44754	95.3786	-0.10925
5.87933	70.7862	12.6364	-1.44835	95.3706	-0.109311
5.88767	70.8745	12.6354	-1.44918	95.3628	-0.109373
5.896	70.9539	12.6343	-1.45	95.3549	-0.109436
5.90433	71.0443	12.6333	-1.45084	95.3471	-0.109499
5.91267	71.1271	12.6323	-1.45168	95.3392	-0.109562
5.921	71.2091	12.6312	-1.45248	95.331	-0.109623
5.92933	71.2913	12.6301	-1.45331	95.3232	-0.109685
5.93767	71.3819	12.6291	-1.45412	95.3153	-0.109747
5.946	71.4595	12.628	-1.45495	95.3075	-0.10981
5.95433	71.5445	12.627	-1.45582	95.2996	-0.109875
5.96267	71.6347	12.626	-1.45666	95.2919	-0.109938
5.971	71.7198	12.625	-1.45752	95.2842	-0.110003
5.97933	71.7997	12.6239	-1.45834	95.2762	-0.110065
5.98767	71.8846	12.6228	-1.45915	95.268	-0.110126
5.996	71.9718	12.6218	-1.45996	95.2599	-0.110187
6.00433	72.0586	12.6207	-1.46081	95.2522	-0.110252
6.01267	72.1376	12.6197	-1.46167	95.2444	-0.110316
6.021	72.2214	12.6186	-1.46249	95.2365	-0.110378
6.02933	72.3051	12.6176	-1.4633	95.2283	-0.110439
6.03767	72.3939	12.6165	-1.46412	95.2202	-0.110501
6.046	72.4753	12.6154	-1.46494	95.2121	-0.110563
6.05433	72.5616	12.6143	-1.46573	95.2039	-0.110622
6.06267	72.648	12.6132	-1.46656	95.1957	-0.110685
6.071	72.7311	12.6122	-1.46743	95.1878	-0.110751
6.07933	72.811	12.6111	-1.46827	95.1795	-0.110815
6.08767	72.898	12.61	-1.4691	95.1713	-0.110877
6.096	72.9837	12.6089	-1.4699	95.163	-0.110938
6.10433	73.0752	12.6078	-1.47074	95.1547	-0.111001
6.11267	73.1503	12.6067	-1.47156	95.1466	-0.111063
6.121	73.239	12.6057	-1.47236	95.1385	-0.111123
6.12933	73.3222	12.6046	-1.47318	95.1304	-0.111185
6.13767	73.4021	12.6035	-1.47403	95.122	-0.111249
6.146	73.4885	12.6024	-1.47487	95.1139	-0.111313
6.15433	73.5749	12.6013	-1.47568	95.1055	-0.111374
6.16267	73.656	12.6002	-1.4765	95.0974	-0.111436
6.171	73.7425	12.5991	-1.47732	95.0893	-0.111497
6.17933	73.8211	12.5981	-1.47819	95.0811	-0.111563
6.18767	73.9119	12.597	-1.47904	95.0731	-0.111627
6.196	73.998	12.5959	-1.47987	95.0651	-0.11169
6.20433	74.0816	12.5948	-1.48073	95.0567	-0.111755
6.21267	74.1621	12.5938	-1.48158	95.0487	-0.111819
6.221	74.2482	12.5927	-1.48241	95.0405	-0.111882
6.22933	74.3264	12.5916	-1.48323	95.0325	-0.111944
6.23767	74.4225	12.5905	-1.48402	95.0244	-0.112004
6.246	74.4983	12.5895	-1.48482	95.0162	-0.112064
6.25433	74.5857	12.5883	-1.48564	95.0078	-0.112126
6.26267	74.6657	12.5872	-1.48643	94.9994	-0.112185
6.271	74.7547	12.5861	-1.48726	94.9912	-0.112248
6.27933	74.8365	12.585	-1.48808	94.9829	-0.112309
6.28767	74.924	12.5839	-1.48889	94.9746	-0.112371
6.296	75.0029	12.5828	-1.48971	94.9661	-0.112433
6.30433	75.0909	12.5817	-1.49054	94.9578	-0.112495
6.31267	75.1747	12.5806	-1.49138	94.9493	-0.112558
6.321	75.2582	12.5795	-1.49226	94.9412	-0.112625
6.32933	75.3427	12.5784	-1.4931	94.9328	-0.112689
6.33767	75.4276	12.5773	-1.49392	94.9245	-0.11275
6.346	75.5124	12.5762	-1.49475	94.9163	-0.112813
6.35433	75.6027	12.5751	-1.49558	94.9078	-0.112876
6.36267	75.6847	12.574	-1.49639	94.8992	-0.112937
6.371	75.7657	12.5729	-1.49721	94.8909	-0.112999
6.37933	75.8511	12.5717	-1.49801	94.8824	-0.113059
6.38767	75.9352	12.5706	-1.49878	94.8742	-0.113117
6.396	76.0208	12.5695	-1.49955	94.8659	-0.113176
6.40433	76.1064	12.5684	-1.5003	94.8574	-0.113232
6.41267	76.187	12.5673	-1.50111	94.849	-0.113293
6.421	76.2719	12.5662	-1.50193	94.8406	-0.113355
6.42933	76.3609	12.5651	-1.50277	94.8321	-0.113418
6.43767	76.445	12.564	-1.50357	94.824	-0.113479
6.446	76.5288	12.5629	-1.50441	94.8156	-0.113542
6.45433	76.6078	12.5618	-1.50525	94.8072	-0.113605
6.46267	76.6914	12.5607	-1.50608	94.7989	-0.113668
6.471	76.7728	12.5595	-1.50692	94.7905	-0.113731
6.47933	76.8558	12.5584	-1.50776	94.782	-0.113795
6.48767	76.9442	12.5573	-1.5086	94.7734	-0.113859
6.496	77.0255	12.5561	-1.5094	94.7648	-0.113919
6.50433	77.1099	12.555	-1.51023	94.7561	-0.113981
6.51267	77.1927	12.5539	-1.51101	94.7478	-0.11404
6.521	77.2761	12.5527	-1.51179	94.7389	-0.114099
6.52933	77.3658	12.5516	-1.51257	94.7303	-0.114158
6.53767	77.4505	12.5505	-1.51332	94.7219	-0.114215
6.546	77.534	12.5493	-1.5141	94.7132	-0.114273
6.55433	77.6179	12.5482	-1.51489	94.7045	-0.114333
6.56267	77.6988	12.547	-1.51568	94.6959	-0.114392
6.571	77.787	12.5459	-1.51645	94.6873	-0.114451
6.57933	77.868	12.5447	-1.51728	94.6787	-0.114513
6.58767	77.9504	12.5436	-1.51805	94.67	-0.114571
6.596	78.0336	12.5424	-1.51884	94.6612	-0.114631
6.60433	78.1196	12.5413	-1.51967	94.6525	-0.114694
6.61267	78.1998	12.5401	-1.52051	94.644	-0.114757
6.621	78.2837	12.539	-1.52133	94.6354	-0.114819
6.62933	78.367	12.5379	-1.52215	94.6268	-0.114881
6.63767	78.4572	12.5367	-1.52293	94.6182	-0.11494
6.646	78.537	12.5356	-1.52373	94.6094	-0.115001
6.65433	78.6224	12.5344	-1.52454	94.6007	-0.115061
6.66267	78.7019	12.5333	-1.52532	94.5923	-0.11512
6.671	78.7843	12.5322	-1.52613	94.5838	-0.115181
6.67933	78.867	12.531	-1.52693	94.5752	-0.115242
6.68767	78.9541	12.5299	-1.52771	94.5664	-0.1153
6.696	79.0383	12.5287	-1.52848	94.5577	-0.115359
6.70433	79.1167	12.5275	-1.52927	94.5488	-0.115418
6.71267	79.2024	12.5264	-1.53007	94.5402	-0.115479
6.721	79.2855	12.5252	-1.53089	94.5315	-0.11554
6.72933	79.3695	12.5241	-1.53167	94.523	-0.115599
6.73767	79.4486	12.523	-1.5325	94.5146	-0.115662
6.746	79.532	12.5218	-1.53331	94.5059	-0.115723
6.75433	79.6204	12.5207	-1.53409	94.497	-0.115782
6.76267	79.7001	12.5195	-1.53489	94.4883	-0.115842
6.771	79.7805	12.5184	-1.53568	94.4797	-0.115902
6.77933	79.8635	12.5172	-1.53648	94.471	-0.115962
6.78767	79.9515	12.5161	-1.53728	94.4623	-0.116023
6.796	80.0276	12.5149	-1.53807	94.4534	-0.116082
6.80433	80.1179	12.5137	-1.53888	94.4447	-0.116143
6.81267	80.201	12.5125	-1.5397	94.4357	-0.116205
6.821	80.2802	12.5114	-1.54048	94.4267	-0.116264
6.82933	80.3627	12.5101	-1.54129	94.4176	-0.116326
6.83767	80.4526	12.509	-1.5421	94.4089	-0.116387
6.846	80.5321	12.5078	-1.54288	94.3998	-0.116446
6.85433	80.6167	12.5066	-1.54365	94.3906	-0.116504
6.86267	80.6945	12.5054	-1.54445	94.3818	-0.116564
6.871	80.7801	12.5042	-1.54522	94.373	-0.116622
6.87933	80.866	12.503	-1.54601	94.3641	-0.116682
6.88767	80.9526	12.5019	-1.54678	94.3551	-0.11674
6.896	81.0323	12.5007	-1.54753	94.3463	-0.116796
6.90433	81.1077	12.4995	-1.5483	94.3375	-0.116855
6.91267	81.1919	12.4984	-1.54906	94.329	-0.116912
6.921	81.2775	12.4972	-1.54983	94.3202	-0.11697
6.92933	81.361	12.4961	-1.5506	94.3116	-0.117028
6.93767	81.4439	12.4949	-1.55135	94.3029	-0.117085
6.946	81.5262	12.4938	-1.55211	94.294	-0.117142
6.95433	81.614	12.4926	-1.55287	94.285	-0.1172
6.96267	81.6948	12.4914	-1.5536	94.2762	-0.117255
6.971	81.7789	12.4903	-1.55433	94.2675	-0.117309
6.97933	81.8619	12.4891	-1.55507	94.2587	-0.117366
6.98767	81.9469	12.4879	-1.5558	94.2496	-0.11742
6.996	82.0263	12.4867	-1.5565	94.2405	-0.117474
7.00433	82.1139	12.4855	-1.55719	94.2318	-0.117525
7.01267	82.1934	12.4843	-1.55788	94.2229	-0.117577
7.021	82.2817	12.4832	-1.55857	94.214	-0.11763
7.02933	82.361	12.482	-1.55923	94.2052	-0.117679
7.03767	82.4421	12.4808	-1.55985	94.1963	-0.117726
7.046	82.5209	12.4796	-1.56051	94.1873	-0.117776
7.05433	82.6055	12.4784	-1.56116	94.1783	-0.117825
7.06267	82.6881	12.4772	-1.5618	94.1693	-0.117874
7.071	82.7716	12.4761	-1.56242	94.1607	-0.11792
7.07933	82.8566	12.4749	-1.56307	94.1518	-0.117969
7.08767	82.9387	12.4737	-1.56371	94.1429	-0.118018
7.096	83.0232	12.4726	-1.56434	94.1339	-0.118065
7.10433	83.1035	12.4714	-1.56496	94.1251	-0.118112
7.11267	83.1894	12.4702	-1.56555	94.1164	-0.118156
7.121	83.2723	12.4691	-1.56616	94.1076	-0.118203
7.12933	83.3607	12.4679	-1.56672	94.0989	-0.118245
7.13767	83.4423	12.4668	-1.56727	94.0903	-0.118287
7.146	83.5201	12.4656	-1.56781	94.0816	-0.118327
7.15433	83.602	12.4644	-1.56834	94.0727	-0.118367
7.16267	83.6891	12.4633	-1.56884	94.064	-0.118405
7.171	83.7707	12.4621	-1.56932	94.0552	-0.118441
7.17933	83.847	12.461	-1.56984	94.0466	-0.118481
7.18767	83.9328	12.4598	-1.57032	94.0376	-0.118517
7.196	84.0167	12.4586	-1.57078	94.0289	-0.118551
7.20433	84.0958	12.4574	-1.57123	94.0199	-0.118585
7.21267	84.1802	12.4563	-1.57166	94.0112	-0.118618
7.221	84.2648	12.4551	-1.57212	94.0025	-0.118652
7.22933	84.3491	12.454	-1.57255	93.9939	-0.118685
7.23767	84.4299	12.4528	-1.573	93.9852	-0.118719
7.246	84.5091	12.4517	-1.57342	93.9765	-0.11875
7.25433	84.5925	12.4506	-1.57385	93.9681	-0.118783
7.26267	84.6745	12.4494	-1.57418	93.9593	-0.118808
7.271	84.7571	12.4483	-1.57455	93.9506	-0.118836
7.27933	84.8403	12.4471	-1.57495	93.9417	-0.118866
7.28767	84.927	12.4459	-1.57534	93.9331	-0.118896
7.296	85.0064	12.4448	-1.57569	93.9244	-0.118922
7.30433	85.0922	12.4436	-1.57602	93.9156	-0.118947
7.31267	85.1739	12.4424	-1.57635	93.9067	-0.118971
7.321	85.2551	12.4413	-1.57664	93.8982	-0.118993
7.32933	85.3412	12.4402	-1.57688	93.8896	-0.119012
7.33767	85.4197	12.439	-1.57711	93.8807	-0.119029
7.346	85.505	12.4379	-1.57737	93.8722	-0.119049
7.35433	85.585	12.4367	-1.5776	93.8635	-0.119066
7.36267	85.6651	12.4356	-1.57781	93.8552	-0.119082
7.371	85.7538	12.4345	-1.57797	93.8466	-0.119094
7.37933	85.834	12.4334	-1.57816	93.8382	-0.119108
7.38767	85.9176	12.4322	-1.57832	93.8297	-0.11912
7.396	86.0028	12.4311	-1.57848	93.8212	-0.119133
7.40433	86.0851	12.43	-1.57862	93.8127	-0.119143
7.41267	86.1702	12.4289	-1.57879	93.8042	-0.119156
7.421	86.2518	12.4277	-1.57897	93.7956	-0.119169
7.42933	86.3362	12.4266	-1.57911	93.7872	-0.11918
7.43767	86.4206	12.4255	-1.57924	93.779	-0.11919
7.446	86.5009	12.4244	-1.57934	93.7706	-0.119197
7.45433	86.5817	12.4233	-1.57944	93.7621	-0.119205
7.46267	86.6665	12.4222	-1.57953	93.7536	-0.119211
7.471	86.7461	12.4211	-1.57962	93.7453	-0.119218
7.47933	86.8301	12.42	-1.57969	93.737	-0.119224
7.48767	86.9146	12.4189	-1.57976	93.7287	-0.119229
7.496	86.9942	12.4178	-1.5798	93.7204	-0.119232
7.50433	87.0794	12.4167	-1.57978	93.7121	-0.119231
7.51267	87.1646	12.4156	-1.57978	93.7039	-0.119231
7.521	87.2439	12.4145	-1.57975	93.6957	-0.119228
7.52933	87.328	12.4134	-1.57976	93.6873	-0.119229
7.53767	87.4124	12.4123	-1.57974	93.6791	-0.119227
7.546	87.4989	12.4112	-1.5797	93.6709	-0.119224
7.55433	87.5793	12.4101	-1.57964	93.6627	-0.11922
7.56267	87.6631	12.409	-1.57959	93.6544	-0.119216
7.571	87.7428	12.4079	-1.5795	93.6461	-0.119209
7.57933	87.8278	12.4068	-1.57941	93.6378	-0.119203
7.58767	87.9119	12.4057	-1.57934	93.6294	-0.119197
7.596	87.9947	12.4046	-1.57924	93.6209	-0.11919
7.60433	88.078	12.4035	-1.57917	93.6124	-0.119184
7.61267	88.1619	12.4024	-1.57905	93.6042	-0.119175
7.621	88.2485	12.4013	-1.5789	93.5961	-0.119164
7.62933	88.3285	12.4002	-1.57876	93.5878	-0.119154
7.63767	88.4136	12.3991	-1.57859	93.5795	-0.119141
7.646	88.4943	12.398	-1.57842	93.5714	-0.119128
7.65433	88.5791	12.3969	-1.57822	93.5631	-0.119113
7.66267	88.6609	12.3958	-1.57802	93.555	-0.119098
7.671	88.749	12.3948	-1.57785	93.5471	-0.119085
7.67933	88.8303	12.3938	-1.57766	93.5392	-0.119071
7.68767	88.9162	12.3927	-1.5774	93.5312	-0.119051
7.696	88.9906	12.3916	-1.57713	93.5231	-0.11903
7.70433	89.0743	12.3906	-1.57686	93.5152	-0.11901
7.71267	89.1595	12.3895	-1.57659	93.5072	-0.118989
7.721	89.2476	12.3885	-1.5763	93.4992	-0.118968
7.72933	89.3299	12.3874	-1.576	93.4913	-0.118945
7.73767	89.4133	12.3864	-1.57569	93.4835	-0.118922
7.746	89.4951	12.3853	-1.57537	93.4755	-0.118897
7.75433	89.5829	12.3842	-1.57498	93.4673	-0.118868
7.76267	89.6607	12.3832	-1.57459	93.4593	-0.118839
7.771	89.7434	12.3821	-1.57422	93.4512	-0.118811
7.77933	89.826	12.381	-1.57388	93.4432	-0.118785
7.78767	89.9108	12.38	-1.57352	93.4351	-0.118758
7.796	89.9923	12.3789	-1.57317	93.4271	-0.118732
7.80433	90.0721	12.3778	-1.5728	93.4191	-0.118704
7.81267	90.162	12.3768	-1.57239	93.4112	-0.118673
7.821	90.2462	12.3757	-1.57197	93.4032	-0.118641
7.82933	90.3295	12.3747	-1.57154	93.3954	-0.118609
7.83767	90.4154	12.3737	-1.5711	93.3877	-0.118576
7.846	90.4939	12.3727	-1.57063	93.3799	-0.11854
7.85433	90.5753	12.3716	-1.57019	93.3721	-0.118506
7.86267	90.6616	12.3706	-1.56969	93.3644	-0.118469
7.871	90.7476	12.3696	-1.56917	93.3569	-0.11843
7.87933	90.8266	12.3686	-1.56862	93.3494	-0.118388
7.88767	90.9142	12.3676	-1.56804	93.3419	-0.118344
7.896	90.993	12.3666	-1.56746	93.3341	-0.118301
7.90433	91.0835	12.3656	-1.56689	93.3267	-0.118257
7.91267	91.1647	12.3646	-1.56627	93.319	-0.118211
7.921	91.2486	12.3636	-1.56566	93.3115	-0.118164
7.92933	91.3333	12.3626	-1.56506	93.304	-0.11812
7.93767	91.4098	12.3616	-1.56441	93.2967	-0.11807
7.946	91.4979	12.3606	-1.56374	93.2893	-0.11802
7.95433	91.5862	12.3597	-1.56309	93.2819	-0.117971
7.96267	91.6705	12.3587	-1.5624	93.2745	-0.117919
7.971	91.7518	12.3577	-1.56171	93.2673	-0.117867
7.97933	91.8314	12.3568	-1.56097	93.26	-0.117811
7.98767	91.9243	12.3558	-1.56021	93.2525	-0.117754
7.996	92.0048	12.3548	-1.55949	93.2453	-0.117699
8.00433	92.088	12.3538	-1.55873	93.2379	-0.117641
8.01267	92.1681	12.3529	-1.55788	93.2306	-0.117578
8.021	92.2536	12.3519	-1.557	93.2234	-0.117511
8.02933	92.343	12.351	-1.55614	93.2162	-0.117447
8.03767	92.4268	12.35	-1.55526	93.209	-0.11738
8.046	92.5071	12.3491	-1.55431	93.2019	-0.117308
8.05433	92.5953	12.3481	-1.55335	93.1947	-0.117236
8.06267	92.6777	12.3472	-1.5524	93.1877	-0.117164
8.071	92.7608	12.3463	-1.5514	93.181	-0.117088
8.07933	92.8443	12.3454	-1.55034	93.1741	-0.117008
8.08767	92.9288	12.3445	-1.54927	93.1671	-0.116928
8.096	93.0123	12.3436	-1.54823	93.1603	-0.11685
8.10433	93.0978	12.3426	-1.54718	93.1534	-0.11677
8.11267	93.1825	12.3417	-1.54607	93.1467	-0.116687
8.121	93.2693	12.3408	-1.54493	93.1399	-0.1166
8.12933	93.3496	12.34	-1.54379	93.1333	-0.116514
8.13767	93.4359	12.3391	-1.54263	93.1265	-0.116427
8.146	93.518	12.3382	-1.54144	93.1198	-0.116337
8.15433	93.6022	12.3373	-1.54024	93.1132	-0.116246
8.16267	93.691	12.3364	-1.53902	93.1066	-0.116155
8.171	93.775	12.3356	-1.53777	93.1001	-0.11606
8.17933	93.8567	12.3347	-1.53644	93.0937	-0.115959
8.18767	93.9393	12.3339	-1.53509	93.0875	-0.115858
8.196	94.0249	12.3331	-1.5337	93.0813	-0.115753
8.20433	94.1094	12.3323	-1.53228	93.075	-0.115645
8.21267	94.1963	12.3314	-1.53084	93.0687	-0.115537
8.221	94.2797	12.3306	-1.52937	93.0624	-0.115426
8.22933	94.3641	12.3298	-1.52788	93.0562	-0.115313
8.23767	94.4466	12.3289	-1.52634	93.0499	-0.115198
8.246	94.5264	12.3281	-1.52475	93.0439	-0.115078
8.25433	94.6137	12.3273	-1.52314	93.038	-0.114956
8.26267	94.6985	12.3265	-1.52156	93.032	-0.114837
8.271	94.7848	12.3257	-1.51996	93.0259	-0.114716
8.27933	94.8674	12.325	-1.51831	93.02	-0.114591
8.28767	94.9481	12.3242	-1.51666	93.0142	-0.114467
8.296	95.0296	12.3234	-1.51499	93.0083	-0.114341
8.30433	95.125	12.3226	-1.51331	93.0024	-0.114213
8.31267	95.206	12.3219	-1.51161	92.9967	-0.114086
8.321	95.2897	12.3211	-1.50992	92.9911	-0.113958
8.32933	95.3791	12.3204	-1.5082	92.9853	-0.113828
8.33767	95.4666	12.3196	-1.50647	92.9795	-0.113697
8.346	95.5501	12.3188	-1.50465	92.9738	-0.11356
8.35433	95.6356	12.3181	-1.50286	92.9681	-0.113425
8.36267	95.7178	12.3173	-1.50108	92.9624	-0.113291
8.371	95.8108	12.3166	-1.49925	92.9567	-0.113153
8.37933	95.8907	12.3158	-1.49746	92.9512	-0.113017
8.38767	95.9757	12.3151	-1.49561	92.9456	-0.112878
8.396	96.0619	12.3144	-1.49373	92.94	-0.112736
8.40433	96.1469	12.3136	-1.49184	92.9344	-0.112593
8.41267	96.2381	12.3129	-1.48993	92.9289	-0.112449
8.421	96.32	12.3122	-1.48806	92.9236	-0.112308
8.42933	96.4026	12.3115	-1.48619	92.9184	-0.112167
8.43767	96.4887	12.3108	-1.48426	92.9131	-0.112021
8.446	96.5713	12.3101	-1.48235	92.9077	-0.111877
8.45433	96.6583	12.3094	-1.48045	92.9024	-0.111734
8.46267	96.7412	12.3087	-1.47854	92.8971	-0.111589
8.471	96.8327	12.308	-1.47662	92.892	-0.111445
8.47933	96.9181	12.3073	-1.47467	92.8871	-0.111298
8.48767	97.0026	12.3067	-1.47274	92.8821	-0.111152
8.496	97.0866	12.306	-1.47081	92.877	-0.111007
8.50433	97.1709	12.3053	-1.46885	92.8716	-0.110859
8.51267	97.2533	12.3046	-1.46693	92.8665	-0.110713
8.521	97.3408	12.3039	-1.465	92.8613	-0.110567
8.52933	97.4252	12.3033	-1.46305	92.8563	-0.110421
8.53767	97.5044	12.3026	-1.46111	92.8514	-0.110274
8.546	97.5955	12.302	-1.45913	92.8464	-0.110124
8.55433	97.6789	12.3013	-1.45716	92.8413	-0.109976
8.56267	97.7652	12.3006	-1.45522	92.8363	-0.109829
8.571	97.8531	12.3	-1.45326	92.8313	-0.109682
8.57933	97.939	12.2993	-1.45125	92.8264	-0.10953
8.58767	98.0259	12.2987	-1.44922	92.8216	-0.109377
8.596	98.1088	12.298	-1.44722	92.8166	-0.109226
8.60433	98.1938	12.2974	-1.44521	92.8117	-0.109074
8.61267	98.2763	12.2967	-1.44322	92.8067	-0.108924
8.621	98.3611	12.296	-1.4412	92.8016	-0.108772
8.62933	98.4516	12.2954	-1.43921	92.7968	-0.108621
8.63767	98.5326	12.2947	-1.43721	92.7919	-0.10847
8.646	98.6248	12.2941	-1.43519	92.7868	-0.108318
8.65433	98.7081	12.2934	-1.43319	92.7819	-0.108167
8.66267	98.7931	12.2928	-1.43126	92.777	-0.108021
8.671	98.8805	12.2921	-1.42934	92.7723	-0.107876
8.67933	98.9636	12.2915	-1.42736	92.7676	-0.107727
8.68767	99.0469	12.2909	-1.42541	92.7628	-0.10758
8.696	99.1329	12.2903	-1.42341	92.7582	-0.107428
8.70433	99.2204	12.2897	-1.42141	92.7536	-0.107278
8.71267	99.3058	12.289	-1.41941	92.7488	-0.107127
8.721	99.3881	12.2884	-1.41743	92.744	-0.106977
8.72933	99.4786	12.2878	-1.4155	92.7394	-0.106832
8.73767	99.5595	12.2872	-1.41351	92.7348	-0.106682
8.746	99.6472	12.2866	-1.41154	92.7302	-0.106533
8.75433	99.7329	12.2859	-1.40955	92.7255	-0.106383
8.76267	99.8156	12.2853	-1.40762	92.7207	-0.106237
8.771	99.9044	12.2847	-1.40565	92.7162	-0.106089
8.77933	99.9881	12.2841	-1.40372	92.7115	-0.105943
8.78767	100.073	12.2835	-1.40179	92.7069	-0.105797
8.796	100.156	12.2829	-1.39989	92.7022	-0.105654
8.80433	100.24	12.2823	-1.39797	92.6978	-0.105508
8.81267	100.33	12.2817	-1.39604	92.6935	-0.105363
8.821	100.414	12.2811	-1.39414	92.6891	-0.10522
8.82933	100.503	12.2806	-1.39222	92.6849	-0.105074
8.83767	100.585	12.28	-1.39036	92.6804	-0.104934
8.846	100.673	12.2794	-1.38845	92.676	-0.104791
8.85433	100.755	12.2788	-1.38657	92.6717	-0.104648
8.86267	100.838	12.2783	-1.38469	92.6675	-0.104506
8.871	100.926	12.2777	-1.38285	92.6631	-0.104368
8.87933	101.008	12.2771	-1.38099	92.6588	-0.104227
8.88767	101.097	12.2765	-1.37913	92.6543	-0.104087
8.896	101.182	12.2759	-1.37729	92.6498	-0.103948
8.90433	101.266	12.2753	-1.37546	92.6452	-0.10381
8.91267	101.349	12.2747	-1.37363	92.6406	-0.103672
8.921	101.437	12.2741	-1.3718	92.6364	-0.103534
8.92933	101.526	12.2736	-1.36999	92.632	-0.103397
8.93767	101.611	12.273	-1.36817	92.6276	-0.10326
8.946	101.693	12.2724	-1.36634	92.6231	-0.103122
8.95433	101.778	12.2718	-1.3645	92.6187	-0.102982
8.96267	101.863	12.2712	-1.36268	92.6142	-0.102845
8.971	101.949	12.2706	-1.36086	92.6099	-0.102708
8.97933	102.033	12.2701	-1.35905	92.6056	-0.102571
8.98767	102.122	12.2695	-1.35725	92.6013	-0.102435
8.996	102.205	12.2689	-1.35542	92.5972	-0.102298
9.00433	102.293	12.2684	-1.35356	92.5928	-0.102157
9.01267	102.378	12.2678	-1.35172	92.5883	-0.102018
9.021	102.465	12.2672	-1.34996	92.5841	-0.101885
9.02933	102.549	12.2666	-1.34823	92.5798	-0.101755
9.03767	102.633	12.2661	-1.34648	92.5757	-0.101623
9.046	102.717	12.2656	-1.34473	92.5717	-0.101491
9.05433	102.806	12.265	-1.34298	92.5674	-0.101359
9.06267	102.891	12.2644	-1.34124	92.5632	-0.101227
9.071	102.977	12.2639	-1.3395	92.5589	-0.101096
9.07933	103.061	12.2633	-1.33781	92.5547	-0.100969
9.08767	103.149	12.2627	-1.33613	92.5504	-0.100842
9.096	103.235	12.2622	-1.33443	92.5463	-0.100713
9.10433	103.317	12.2616	-1.33268	92.5421	-0.100581
9.11267	103.405	12.2611	-1.33095	92.5382	-0.10045
9.121	103.49	12.2606	-1.32922	92.5342	-0.10032
9.12933	103.577	12.26	-1.32752	92.53	-0.100192
9.13767	103.663	12.2595	-1.32584	92.526	-0.100065
9.146	103.748	12.259	-1.32414	92.5218	-0.0999367
9.15433	103.834	12.2584	-1.32245	92.5178	-0.0998088
9.16267	103.921	12.2579	-1.32076	92.5137	-0.0996817
9.171	104.005	12.2574	-1.31911	92.5098	-0.0995571
9.17933	104.091	12.2568	-1.31744	92.5057	-0.0994306
9.18767	104.177	12.2563	-1.31579	92.5017	-0.0993064
9.196	104.261	12.2557	-1.31417	92.4974	-0.0991839
9.20433	104.343	12.2552	-1.31256	92.4931	-0.0990628
9.21267	104.432	12.2546	-1.31094	92.4893	-0.0989404
9.221	104.515	12.2541	-1.30934	92.4854	-0.0988196
9.22933	104.602	12.2536	-1.30772	92.4813	-0.0986975
9.23767	104.686	12.2531	-1.30611	92.4774	-0.0985757
9.246	104.776	12.2525	-1.30451	92.4734	-0.0984548
9.25433	104.859	12.252	-1.30292	92.4692	-0.0983349
9.26267	104.942	12.2514	-1.30138	92.465	-0.0982191
9.271	105.025	12.2509	-1.29981	92.461	-0.0981003
9.27933	105.117	12.2504	-1.2982	92.457	-0.0979786
9.28767	105.205	12.2499	-1.29662	92.4532	-0.0978596
9.296	105.284	12.2493	-1.29504	92.449	-0.0977406
9.30433	105.373	12.2488	-1.29347	92.4449	-0.0976215
9.31267	105.453	12.2483	-1.29194	92.4411	-0.0975064
9.321	105.541	12.2477	-1.29041	92.437	-0.0973909
9.32933	105.628	12.2472	-1.28886	92.4332	-0.0972738
9.33767	105.711	12.2467	-1.28732	92.4294	-0.0971577
9.346	105.794	12.2462	-1.28575	92.4256	-0.0970394
9.35433	105.878	12.2457	-1.28423	92.4218	-0.0969248
9.36267	105.967	12.2452	-1.28275	92.418	-0.0968124
9.371	106.058	12.2447	-1.28121	92.4141	-0.0966969
9.37933	106.139	12.2441	-1.27969	92.4101	-0.0965818
9.38767	106.223	12.2437	-1.27819	92.4063	-0.0964686
9.396	106.309	12.2431	-1.27669	92.4024	-0.0963556
9.40433	106.396	12.2426	-1.27517	92.3985	-0.0962407
9.41267	106.478	12.2421	-1.27371	92.3944	-0.0961302
9.421	106.567	12.2415	-1.27223	92.3904	-0.0960191
9.42933	106.653	12.241	-1.27075	92.3865	-0.0959067
9.43767	106.736	12.2405	-1.26927	92.3825	-0.0957957
9.446	106.823	12.24	-1.26781	92.3785	-0.0956856
9.45433	106.907	12.2394	-1.26636	92.3745	-0.095576
9.46267	106.993	12.239	-1.26491	92.3708	-0.0954666
9.471	107.078	12.2384	-1.26345	92.3669	-0.0953564
9.47933	107.166	12.2379	-1.26202	92.3631	-0.0952479
9.48767	107.249	12.2374	-1.26059	92.3594	-0.0951404
9.496	107.328	12.2369	-1.25915	92.3557	-0.0950313
9.50433	107.418	12.2365	-1.25771	92.352	-0.0949226
9.51267	107.499	12.236	-1.25633	92.3484	-0.0948185
9.521	107.586	12.2355	-1.25494	92.3446	-0.0947142
9.52933	107.674	12.235	-1.25351	92.3409	-0.0946063
9.53767	107.76	12.2345	-1.25213	92.3372	-0.0945018
9.546	107.841	12.234	-1.25076	92.3334	-0.0943988
9.55433	107.926	12.2335	-1.2494	92.3298	-0.0942956
9.56267	108.015	12.233	-1.24802	92.3261	-0.0941913
9.571	108.099	12.2325	-1.24668	92.3225	-0.0940905
9.57933	108.184	12.2321	-1.24535	92.3188	-0.0939898
9.58767	108.267	12.2316	-1.244	92.3151	-0.093888
9.596	108.348	12.2311	-1.24265	92.3114	-0.0937864
9.60433	108.433	12.2306	-1.24129	92.308	-0.093684
9.61267	108.522	12.2301	-1.23998	92.3043	-0.0935847
9.621	108.607	12.2297	-1.23866	92.3007	-0.0934849
9.62933	108.688	12.2292	-1.23734	92.2972	-0.0933855
9.63767	108.779	12.2287	-1.23603	92.2932	-0.0932864
9.646	108.863	12.2282	-1.23472	92.2895	-0.093188
9.65433	108.942	12.2277	-1.23344	92.2859	-0.0930908
9.66267	109.028	12.2272	-1.23213	92.2823	-0.0929922
9.671	109.116	12.2267	-1.23082	92.2786	-0.0928933
9.67933	109.198	12.2262	-1.22953	92.2748	-0.0927963
9.68767	109.284	12.2257	-1.22823	92.2712	-0.0926982
9.696	109.371	12.2253	-1.22697	92.2677	-0.0926031
9.70433	109.451	12.2248	-1.2257	92.264	-0.092507
9.71267	109.539	12.2243	-1.22439	92.2603	-0.0924086
9.721	109.629	12.2239	-1.22312	92.2569	-0.0923126
9.72933	109.71	12.2234	-1.22184	92.2533	-0.0922157
9.73767	109.793	12.2229	-1.22054	92.2498	-0.0921179
9.746	109.882	12.2225	-1.21929	92.2463	-0.092023
9.75433	109.968	12.222	-1.21807	92.2427	-0.091931
9.76267	110.052	12.2215	-1.21681	92.2392	-0.0918361
9.771	110.138	12.221	-1.21558	92.2354	-0.0917435
9.77933	110.222	12.2205	-1.21434	92.2317	-0.0916496
9.78767	110.309	12.22	-1.21307	92.2281	-0.0915539
9.796	110.392	12.2196	-1.21186	92.2246	-0.0914628
9.80433	110.475	12.2191	-1.21062	92.2209	-0.0913691
9.81267	110.563	12.2186	-1.20939	92.2174	-0.0912765
9.821	110.651	12.2181	-1.20818	92.2138	-0.0911848
9.82933	110.729	12.2177	-1.20696	92.2103	-0.0910924
9.83767	110.812	12.2172	-1.20572	92.2067	-0.090999
9.846	110.9	12.2167	-1.2045	92.2031	-0.0909073
9.85433	110.987	12.2163	-1.20329	92.1997	-0.0908154
9.86267	111.071	12.2158	-1.20206	92.1963	-0.090723
9.871	111.155	12.2154	-1.20089	92.1927	-0.0906347
9.87933	111.24	12.2149	-1.19972	92.1892	-0.0905465
9.88767	111.324	12.2144	-1.19855	92.1857	-0.0904577
9.896	111.412	12.214	-1.19739	92.1822	-0.0903703
9.90433	111.497	12.2135	-1.19623	92.1787	-0.0902826
9.91267	111.578	12.213	-1.1951	92.1751	-0.0901976
9.921	111.659	12.2126	-1.19395	92.1716	-0.090111
9.92933	111.745	12.2121	-1.19281	92.168	-0.0900245
9.93767	111.831	12.2116	-1.19167	92.1645	-0.089939
9.946	111.913	12.2111	-1.19057	92.161	-0.0898557
9.95433	112.003	12.2107	-1.18945	92.1575	-0.0897708
9.96267	112.087	12.2102	-1.18831	92.1541	-0.0896849
9.971	112.174	12.2098	-1.1872	92.1505	-0.0896017
9.97933	112.253	12.2093	-1.18609	92.1472	-0.0895179
9.98767	112.337	12.2089	-1.18495	92.1439	-0.0894316
9.996	112.421	12.2085	-1.18382	92.1407	-0.0893466
10.0043	112.511	12.208	-1.18271	92.1374	-0.0892622
10.0127	112.597	12.2076	-1.18161	92.1342	-0.0891791
10.021	112.681	12.2072	-1.1805	92.1311	-0.0890954
10.0293	112.764	12.2068	-1.17936	92.128	-0.0890099
10.0377	112.848	12.2063	-1.17827	92.1247	-0.0889273
10.046	112.938	12.2059	-1.17715	92.1215	-0.0888432
10.0543	113.014	12.2055	-1.17605	92.1183	-0.0887596
10.0627	113.1	12.205	-1.17498	92.1148	-0.0886788
10.071	113.189	12.2046	-1.17389	92.1114	-0.0885971
10.0793	113.273	12.2041	-1.17277	92.108	-0.0885123
10.0877	113.359	12.2037	-1.17171	92.1046	-0.088432
10.096	113.445	12.2032	-1.17065	92.1009	-0.0883524
10.1043	113.525	12.2027	-1.16961	92.0972	-0.0882739
10.1127	113.609	12.2022	-1.16854	92.0935	-0.0881933
10.121	113.701	12.2017	-1.16745	92.0898	-0.0881111
10.1293	113.784	12.2012	-1.16642	92.0863	-0.0880331
10.1377	113.862	12.2008	-1.16538	92.0828	-0.0879545
10.146	113.953	12.2003	-1.16431	92.0794	-0.0878735
10.1543	114.037	12.1999	-1.16328	92.076	-0.0877963
10.1627	114.119	12.1995	-1.1623	92.0727	-0.0877222
10.171	114.199	12.199	-1.16129	92.0694	-0.0876459
10.1793	114.291	12.1986	-1.16024	92.0663	-0.0875669
10.1877	114.379	12.1982	-1.15919	92.063	-0.0874873
10.196	114.459	12.1977	-1.15818	92.0598	-0.0874109
10.2043	114.542	12.1973	-1.15719	92.0568	-0.0873364
10.2127	114.627	12.1969	-1.15619	92.0537	-0.087261
10.221	114.716	12.1965	-1.15519	92.0505	-0.0871856
10.2293	114.8	12.1961	-1.1542	92.0474	-0.087111
10.2377	114.885	12.1957	-1.15322	92.0441	-0.0870364
10.246	114.963	12.1952	-1.1522	92.0409	-0.08696
10.2543	115.049	12.1948	-1.1512	92.0375	-0.0868844
10.2627	115.132	12.1944	-1.15022	92.0342	-0.0868104
10.271	115.219	12.1939	-1.14925	92.031	-0.0867374
10.2793	115.306	12.1935	-1.14827	92.0279	-0.0866636
10.2877	115.386	12.1931	-1.14727	92.0245	-0.0865878
10.296	115.475	12.1926	-1.14626	92.0209	-0.0865118
10.3043	115.559	12.1921	-1.14529	92.0175	-0.0864386
10.3127	115.644	12.1917	-1.14433	92.014	-0.0863655
10.321	115.724	12.1913	-1.14335	92.0108	-0.0862922
10.3293	115.812	12.1908	-1.14239	92.0075	-0.0862196
10.3377	115.898	12.1904	-1.14143	92.0041	-0.0861468
10.346	115.981	12.1899	-1.1405	92.0008	-0.0860769
10.3543	116.066	12.1895	-1.13956	91.9976	-0.0860061
10.3627	116.152	12.1891	-1.13864	91.9945	-0.085936
10.371	116.235	12.1887	-1.13773	91.9914	-0.0858676
10.3793	116.318	12.1883	-1.13682	91.9884	-0.0857992
10.3877	116.403	12.1879	-1.13588	91.9852	-0.0857282
10.396	116.485	12.1875	-1.13493	91.9821	-0.0856567
10.4043	116.569	12.187	-1.13403	91.9791	-0.0855888
10.4127	116.658	12.1866	-1.13312	91.976	-0.0855194
10.421	116.743	12.1863	-1.1322	91.9732	-0.0854502
10.4293	116.824	12.1858	-1.13128	91.97	-0.0853807
10.4377	116.909	12.1854	-1.13036	91.9669	-0.0853115
10.446	116.99	12.185	-1.12947	91.964	-0.085244
10.4543	117.076	12.1846	-1.12856	91.9609	-0.0851757
10.4627	117.157	12.1842	-1.12766	91.9578	-0.0851077
10.471	117.243	12.1838	-1.12676	91.9548	-0.0850399
10.4793	117.326	12.1834	-1.1259	91.9517	-0.0849749
10.4877	117.413	12.183	-1.125	91.9486	-0.0849069
10.496	117.499	12.1826	-1.12411	91.9457	-0.0848401
10.5043	117.578	12.1822	-1.12323	91.9424	-0.0847735
10.5127	117.663	12.1818	-1.12231	91.9395	-0.0847043
10.521	117.748	12.1814	-1.12142	91.9364	-0.0846364
10.5293	117.831	12.181	-1.12057	91.9332	-0.0845724
10.5377	117.914	12.1806	-1.11969	91.9301	-0.084506
10.546	118.001	12.1801	-1.1188	91.927	-0.0844389
10.5543	118.084	12.1797	-1.11792	91.9239	-0.0843728
10.5627	118.17	12.1793	-1.11703	91.9208	-0.0843055
10.571	118.253	12.1789	-1.11617	91.9175	-0.0842406
10.5793	118.339	12.1785	-1.1153	91.9144	-0.0841748
10.5877	118.424	12.1781	-1.11445	91.9113	-0.0841109
10.596	118.501	12.1777	-1.11363	91.9083	-0.0840484
10.6043	118.584	12.1772	-1.1128	91.905	-0.0839859
10.6127	118.673	12.1768	-1.11193	91.9018	-0.0839209
10.621	118.758	12.1764	-1.1111	91.8987	-0.0838582
10.6293	118.845	12.176	-1.11028	91.8959	-0.0837957
10.6377	118.928	12.1756	-1.10944	91.8928	-0.0837329
10.646	119.014	12.1752	-1.10862	91.8898	-0.0836709
10.6543	119.096	12.1748	-1.10779	91.887	-0.0836078
10.6627	119.186	12.1744	-1.10699	91.884	-0.083548
10.671	119.268	12.174	-1.10619	91.8809	-0.0834874
10.6793	119.357	12.1736	-1.10539	91.8778	-0.0834272
10.6877	119.436	12.1733	-1.10459	91.875	-0.0833665
10.696	119.522	12.1729	-1.1038	91.872	-0.083307
10.7043	119.604	12.1725	-1.10302	91.869	-0.0832478
10.7127	119.691	12.172	-1.10225	91.8657	-0.0831903
10.721	119.772	12.1716	-1.1015	91.8624	-0.0831332
10.7293	119.863	12.1712	-1.10072	91.8593	-0.0830745
10.7377	119.942	12.1708	-1.09994	91.8562	-0.0830154
10.746	120.029	12.1704	-1.09913	91.8533	-0.0829548
10.7543	120.115	12.17	-1.09833	91.8504	-0.0828942
10.7627	120.204	12.1696	-1.09756	91.8474	-0.0828363
10.771	120.28	12.1692	-1.0968	91.8443	-0.0827785
10.7793	120.367	12.1688	-1.096	91.8414	-0.0827181
10.7877	120.448	12.1684	-1.09523	91.8384	-0.08266
10.796	120.534	12.168	-1.09443	91.8355	-0.0825995
10.8043	120.612	12.1677	-1.09364	91.8328	-0.0825405
10.8127	120.704	12.1673	-1.0929	91.8298	-0.0824842
10.821	120.785	12.1669	-1.09215	91.8267	-0.0824274
10.8293	120.866	12.1664	-1.09142	91.8235	-0.0823722
10.8377	120.95	12.166	-1.09071	91.8203	-0.0823188
10.846	121.038	12.1656	-1.08999	91.8171	-0.0822646
10.8543	121.122	12.1652	-1.08929	91.8142	-0.0822115
10.8627	121.205	12.1648	-1.08858	91.8112	-0.0821584
10.871	121.287	12.1644	-1.08786	91.8081	-0.0821039
10.8793	121.373	12.164	-1.08717	91.8052	-0.0820515
10.8877	121.455	12.1636	-1.08647	91.8023	-0.0819989
10.896	121.543	12.1632	-1.08574	91.7993	-0.0819436
10.9043	121.627	12.1629	-1.08503	91.7965	-0.0818905
10.9127	121.712	12.1625	-1.08433	91.7938	-0.0818373
10.921	121.793	12.1621	-1.08361	91.791	-0.0817833
10.9293	121.879	12.1617	-1.0829	91.7882	-0.0817298
10.9377	121.96	12.1614	-1.0822	91.7852	-0.081677
10.946	122.046	12.161	-1.08152	91.7824	-0.081625
10.9543	122.128	12.1606	-1.0808	91.7796	-0.0815709
10.9627	122.22	12.1602	-1.0801	91.7769	-0.0815178
10.971	122.302	12.1599	-1.0794	91.7739	-0.0814656
10.9793	122.387	12.1595	-1.07871	91.7712	-0.0814129
10.9877	122.466	12.1591	-1.07804	91.7683	-0.0813627
10.996	122.553	12.1587	-1.07736	91.7653	-0.0813117
11.0043	122.639	12.1584	-1.07667	91.7627	-0.081259
11.0127	122.726	12.158	-1.07597	91.76	-0.0812061
11.021	122.804	12.1577	-1.07524	91.7573	-0.0811516
11.0293	122.893	12.1573	-1.07453	91.7544	-0.0810979
11.0377	122.973	12.1569	-1.07385	91.7516	-0.0810468
11.046	123.059	12.1565	-1.07313	91.7487	-0.0809925
11.0543	123.142	12.1562	-1.07243	91.746	-0.0809392
11.0627	123.229	12.1558	-1.07174	91.7431	-0.0808871
11.071	123.305	12.1554	-1.07102	91.7403	-0.0808327
11.0793	123.393	12.155	-1.0703	91.7373	-0.0807783
11.0877	123.478	12.1546	-1.06961	91.7343	-0.0807262
11.096	123.567	12.1542	-1.06892	91.7313	-0.0806744
11.1043	123.646	12.1538	-1.06826	91.7283	-0.0806244
11.1127	123.733	12.1534	-1.06758	91.7255	-0.0805735
11.121	123.816	12.153	-1.06694	91.7224	-0.0805248
11.1293	123.9	12.1527	-1.06632	91.7196	-0.0804783
11.1377	123.985	12.1523	-1.06568	91.7166	-0.0804297
11.146	124.07	12.1519	-1.06506	91.7138	-0.0803831
11.1543	124.15	12.1515	-1.0644	91.711	-0.0803333
11.1627	124.235	12.1512	-1.06379	91.7083	-0.0802873
11.171	124.319	12.1508	-1.06314	91.7054	-0.0802384
11.1793	124.406	12.1504	-1.06248	91.7025	-0.0801885
11.1877	124.489	12.15	-1.06182	91.6997	-0.0801384
11.196	124.574	12.1496	-1.06115	91.6969	-0.0800883
11.2043	124.664	12.1493	-1.0605	91.6941	-0.0800392
11.2127	124.748	12.1489	-1.05985	91.6911	-0.0799896
11.221	124.823	12.1485	-1.05919	91.6882	-0.0799401
11.2293	124.912	12.1481	-1.05854	91.6852	-0.0798906
11.2377	124.999	12.1477	-1.05791	91.6823	-0.0798432
11.246	125.082	12.1473	-1.05722	91.6793	-0.0797914
11.2543	125.157	12.147	-1.05659	91.6766	-0.0797436
11.2627	125.246	12.1466	-1.05596	91.674	-0.0796964
11.271	125.327	12.1463	-1.05532	91.6714	-0.0796481
11.2793	125.414	12.1459	-1.05468	91.6687	-0.0795996
11.2877	125.498	12.1455	-1.054	91.6658	-0.0795486
11.296	125.584	12.1452	-1.05336	91.663	-0.0795001
11.3043	125.666	12.1448	-1.05272	91.6604	-0.079452
11.3127	125.755	12.1445	-1.0521	91.6578	-0.0794047
11.321	125.837	12.1441	-1.05145	91.6551	-0.079356
11.3293	125.919	12.1438	-1.05084	91.6526	-0.0793098
11.3377	126.005	12.1434	-1.0502	91.6498	-0.0792618
11.346	126.089	12.143	-1.04956	91.6468	-0.079213
11.3543	126.173	12.1426	-1.04893	91.6439	-0.0791654
11.3627	126.259	12.1423	-1.04832	91.6413	-0.0791195
11.371	126.338	12.142	-1.04772	91.6389	-0.0790741
11.3793	126.427	12.1416	-1.04708	91.6363	-0.079026
11.3877	126.512	12.1413	-1.04647	91.6336	-0.07898
11.396	126.597	12.1409	-1.04583	91.631	-0.0789317
11.4043	126.679	12.1406	-1.04521	91.6285	-0.0788849
11.4127	126.767	12.1402	-1.04459	91.6258	-0.0788379
11.421	126.846	12.1399	-1.04395	91.623	-0.0787897
11.4293	126.93	12.1395	-1.04332	91.6206	-0.0787423
11.4377	127.015	12.1392	-1.04272	91.618	-0.078697
11.446	127.096	12.1388	-1.04211	91.6153	-0.0786511
11.4543	127.185	12.1385	-1.04149	91.6126	-0.0786044
11.4627	127.265	12.1381	-1.04092	91.6099	-0.078561
11.471	127.35	12.1378	-1.04033	91.6072	-0.078517
11.4793	127.432	12.1374	-1.03973	91.6045	-0.0784713
11.4877	127.518	12.1371	-1.03915	91.6018	-0.0784277
11.496	127.606	12.1367	-1.03858	91.599	-0.0783844
11.5043	127.689	12.1363	-1.03798	91.5964	-0.0783394
11.5127	127.771	12.136	-1.03739	91.5935	-0.0782945
11.521	127.851	12.1356	-1.03675	91.5909	-0.0782466
11.5293	127.941	12.1352	-1.03611	91.5882	-0.0781982
11.5377	128.025	12.1349	-1.03547	91.5852	-0.0781498
11.546	128.109	12.1345	-1.03483	91.5826	-0.0781016
11.5543	128.192	12.1341	-1.03419	91.5799	-0.078053
11.5627	128.276	12.1338	-1.03361	91.5772	-0.0780098
11.571	128.365	12.1334	-1.03301	91.5745	-0.077964
11.5793	128.449	12.1331	-1.0324	91.5719	-0.0779179
11.5877	128.529	12.1328	-1.03183	91.5694	-0.0778753
11.596	128.614	12.1324	-1.03126	91.5668	-0.0778323
11.6043	128.699	12.1321	-1.03069	91.5642	-0.077789
11.6127	128.784	12.1317	-1.03012	91.5614	-0.0777464
11.621	128.868	12.1314	-1.02956	91.559	-0.0777037
11.6293	128.951	12.131	-1.02896	91.5563	-0.0776584
11.6377	129.035	12.1307	-1.0284	91.5539	-0.0776164
11.646	129.119	12.1304	-1.02781	91.5514	-0.0775721
11.6543	129.197	12.13	-1.02722	91.5486	-0.0775269
11.6627	129.285	12.1297	-1.0266	91.5461	-0.0774808
11.671	129.368	12.1293	-1.02601	91.5436	-0.0774357
11.6793	129.452	12.129	-1.02543	91.541	-0.0773917
11.6877	129.536	12.1287	-1.02487	91.5385	-0.0773495
11.696	129.622	12.1283	-1.02432	91.5361	-0.0773085
11.7043	129.706	12.128	-1.02379	91.5336	-0.0772686
11.7127	129.788	12.1276	-1.02328	91.5307	-0.0772301
11.721	129.874	12.1273	-1.02271	91.5281	-0.077187
11.7293	129.955	12.127	-1.02213	91.5255	-0.077143
11.7377	130.044	12.1266	-1.02156	91.523	-0.0771003
11.746	130.12	12.1263	-1.02099	91.5205	-0.0770568
11.7543	130.21	12.1259	-1.02042	91.5178	-0.0770137
11.7627	130.292	12.1256	-1.01983	91.5152	-0.0769694
11.771	130.376	12.1252	-1.01925	91.5126	-0.0769254
11.7793	130.458	12.1249	-1.01864	91.5103	-0.0768797
11.7877	130.543	12.1246	-1.01804	91.5079	-0.0768345
11.796	130.628	12.1243	-1.01743	91.5058	-0.0767886
11.8043	130.708	12.124	-1.01684	91.5031	-0.0767437
11.8127	130.8	12.1236	-1.01626	91.5006	-0.0767003
11.821	130.877	12.1233	-1.0157	91.4981	-0.0766578
11.8293	130.96	12.123	-1.01517	91.4957	-0.0766175
11.8377	131.044	12.1227	-1.01462	91.4934	-0.0765766
11.846	131.128	12.1224	-1.01408	91.4909	-0.0765356
11.8543	131.211	12.122	-1.0135	91.4884	-0.0764915
11.8627	131.299	12.1217	-1.01291	91.4855	-0.0764474
11.871	131.379	12.1213	-1.01234	91.4827	-0.0764042
11.8793	131.469	12.1209	-1.0118	91.4802	-0.0763633
11.8877	131.552	12.1206	-1.01124	91.4778	-0.076321
11.896	131.635	12.1203	-1.01069	91.4754	-0.0762794
11.9043	131.721	12.1199	-1.01012	91.4727	-0.0762363
11.9127	131.806	12.1196	-1.00951	91.4701	-0.0761907
11.921	131.891	12.1193	-1.00887	91.4676	-0.0761423
11.9293	131.973	12.119	-1.00825	91.4652	-0.0760952
11.9377	132.055	12.1186	-1.00768	91.4627	-0.0760528
11.946	132.136	12.1183	-1.00715	91.4602	-0.0760123
11.9543	132.225	12.118	-1.00656	91.4577	-0.0759678
11.9627	132.305	12.1176	-1.00594	91.4551	-0.0759208
11.971	132.391	12.1173	-1.00537	91.4526	-0.0758781
11.9793	132.473	12.117	-1.00479	91.4501	-0.0758343
11.9877	132.556	12.1166	-1.00422	91.4478	-0.0757913
11.996	132.637	12.1163	-1.00367	91.4454	-0.0757495
12.0043	132.726	12.116	-1.00313	91.4431	-0.0757094
12.0127	132.811	12.1157	-1.0026	91.4408	-0.0756688
12.021	132.894	12.1154	-1.00203	91.4385	-0.0756263
12.0293	132.974	12.1151	-1.00146	91.4362	-0.0755833
12.0377	133.06	12.1148	-1.00094	91.434	-0.0755438
12.046	133.144	12.1145	-1.00039	91.4317	-0.0755026
12.0543	133.229	12.1142	-0.999804	91.4294	-0.0754581
12.0627	133.311	12.1139	-0.999187	91.427	-0.0754115
12.071	133.399	12.1136	-0.99862	91.4249	-0.0753687
12.0793	133.476	12.1133	-0.998088	91.4225	-0.0753285
12.0877	133.566	12.113	-0.997538	91.4201	-0.0752871
12.096	133.644	12.1127	-0.996972	91.4177	-0.0752443
12.1043	133.737	12.1123	-0.996431	91.4153	-0.0752035
12.1127	133.813	12.1121	-0.995901	91.4132	-0.0751635
12.121	133.9	12.1117	-0.995327	91.4107	-0.0751201
12.1293	133.983	12.1115	-0.994765	91.4086	-0.0750777
12.1377	134.069	12.1112	-0.994247	91.4063	-0.0750387
12.146	134.15	12.1108	-0.993748	91.4038	-0.075001
12.1543	134.235	12.1105	-0.993218	91.4013	-0.074961
12.1627	134.317	12.1102	-0.99264	91.399	-0.0749173
12.171	134.398	12.1099	-0.992083	91.3968	-0.0748753
12.1793	134.486	12.1096	-0.991556	91.3946	-0.0748355
12.1877	134.567	12.1093	-0.990987	91.3923	-0.0747926
12.196	134.651	12.109	-0.990417	91.3898	-0.0747496
12.2043	134.736	12.1087	-0.989863	91.3874	-0.0747078
12.2127	134.819	12.1083	-0.989344	91.3849	-0.0746686
12.221	134.904	12.108	-0.988802	91.3827	-0.0746277
12.2293	134.991	12.1077	-0.988246	91.3806	-0.0745857
12.2377	135.071	12.1074	-0.987692	91.3783	-0.0745439
12.246	135.158	12.1071	-0.987157	91.3759	-0.0745035
12.2543	135.239	12.1068	-0.986614	91.3734	-0.0744626
12.2627	135.322	12.1065	-0.986078	91.3709	-0.0744221
12.271	135.405	12.1061	-0.985571	91.3685	-0.0743839
12.2793	135.486	12.1058	-0.985009	91.3662	-0.0743414
12.2877	135.57	12.1055	-0.984468	91.3639	-0.0743006
12.296	135.66	12.1052	-0.983927	91.3617	-0.0742597
12.3043	135.738	12.1049	-0.983387	91.3592	-0.074219
12.3127	135.829	12.1046	-0.982848	91.3567	-0.0741783
12.321	135.91	12.1043	-0.982285	91.3543	-0.0741358
12.3293	135.994	12.104	-0.981766	91.352	-0.0740967
12.3377	136.075	12.1037	-0.981242	91.3499	-0.0740571
12.346	136.162	12.1034	-0.980711	91.3478	-0.074017
12.3543	136.244	12.1031	-0.980174	91.3455	-0.0739765
12.3627	136.332	12.1028	-0.979662	91.3433	-0.0739379
12.371	136.415	12.1025	-0.979162	91.3412	-0.0739001
12.3793	136.5	12.1022	-0.978625	91.3389	-0.0738596
12.3877	136.582	12.1019	-0.97808	91.3365	-0.0738185
12.396	136.667	12.1016	-0.977537	91.3345	-0.0737775
12.4043	136.747	12.1014	-0.977021	91.3324	-0.0737386
12.4127	136.834	12.1011	-0.976484	91.3301	-0.073698
12.421	136.913	12.1007	-0.975949	91.3278	-0.0736576
12.4293	137.001	12.1004	-0.975391	91.3255	-0.0736155
12.4377	137.079	12.1001	-0.974856	91.3233	-0.0735752
12.446	137.166	12.0999	-0.974325	91.3212	-0.0735351
12.4543	137.253	12.0996	-0.973792	91.319	-0.0734948
12.4627	137.337	12.0993	-0.973258	91.3172	-0.0734545
12.471	137.42	12.0991	-0.972749	91.315	-0.0734161
12.4793	137.505	12.0987	-0.972251	91.3126	-0.0733785
12.4877	137.583	12.0984	-0.971763	91.3104	-0.0733417
12.496	137.674	12.0981	-0.971248	91.3081	-0.0733029
12.5043	137.751	12.0979	-0.970734	91.3061	-0.073264
12.5127	137.836	12.0976	-0.970236	91.3039	-0.0732264
12.521	137.923	12.0973	-0.969722	91.3018	-0.0731877
12.5293	138.007	12.097	-0.96924	91.2996	-0.0731513
12.5377	138.089	12.0967	-0.968748	91.2972	-0.0731142
12.546	138.173	12.0964	-0.968256	91.2949	-0.0730771
12.5543	138.256	12.0961	-0.967764	91.2927	-0.0730399
12.5627	138.34	12.0958	-0.967289	91.2906	-0.0730041
12.571	138.428	12.0955	-0.966789	91.2884	-0.0729663
12.5793	138.516	12.0953	-0.966284	91.2863	-0.0729282
12.5877	138.598	12.095	-0.965802	91.2841	-0.0728918
12.596	138.679	12.0947	-0.965297	91.282	-0.0728537
12.6043	138.761	12.0944	-0.964792	91.2799	-0.0728156
12.6127	138.846	12.0941	-0.964287	91.2777	-0.0727775
12.621	138.93	12.0938	-0.963788	91.2754	-0.0727398
12.6293	139.017	12.0935	-0.963281	91.2732	-0.0727015
12.6377	139.099	12.0932	-0.962785	91.2711	-0.0726641
12.646	139.183	12.093	-0.962259	91.2689	-0.0726244
12.6543	139.266	12.0927	-0.96176	91.2667	-0.0725867
12.6627	139.35	12.0924	-0.961258	91.2647	-0.0725489
12.671	139.436	12.0921	-0.960759	91.2625	-0.0725112
12.6793	139.519	12.0918	-0.960286	91.2602	-0.0724755
12.6877	139.604	12.0915	-0.959844	91.2578	-0.0724421
12.696	139.69	12.0912	-0.959348	91.2558	-0.0724047
12.7043	139.773	12.0909	-0.95887	91.2538	-0.0723687
12.7127	139.854	12.0907	-0.958394	91.2516	-0.0723327
12.721	139.936	12.0904	-0.957897	91.2495	-0.0722952
12.7293	140.021	12.0901	-0.957444	91.2475	-0.072261
12.7377	140.104	12.0899	-0.956983	91.2455	-0.0722262
12.746	140.188	12.0895	-0.956548	91.2433	-0.0721934
12.7543	140.273	12.0893	-0.956114	91.2412	-0.0721606
12.7627	140.357	12.089	-0.955647	91.2391	-0.0721254
12.771	140.442	12.0887	-0.955149	91.2372	-0.0720878
12.7793	140.525	12.0884	-0.954665	91.2349	-0.0720513
12.7877	140.608	12.0881	-0.954182	91.2326	-0.0720148
12.796	140.694	12.0879	-0.953722	91.2305	-0.0719801
12.8043	140.776	12.0876	-0.953281	91.2285	-0.0719468
12.8127	140.866	12.0873	-0.952811	91.2264	-0.0719113
12.821	140.943	12.0871	-0.952336	91.2245	-0.0718755
12.8293	141.03	12.0868	-0.951851	91.2225	-0.0718389
12.8377	141.117	12.0865	-0.951357	91.2205	-0.0718016
12.846	141.198	12.0863	-0.95087	91.2184	-0.0717649
12.8543	141.281	12.086	-0.950394	91.2162	-0.0717289
12.8627	141.367	12.0857	-0.949951	91.2141	-0.0716955
12.871	141.446	12.0854	-0.949495	91.2121	-0.071661
12.8793	141.535	12.0852	-0.949035	91.2101	-0.0716264
12.8877	141.614	12.0849	-0.948552	91.208	-0.0715899
12.896	141.707	12.0846	-0.948068	91.2059	-0.0715534
12.9043	141.787	12.0843	-0.947586	91.2037	-0.071517
12.9127	141.871	12.084	-0.947131	91.2015	-0.0714827
12.921	141.952	12.0837	-0.946686	91.1994	-0.0714491
12.9293	142.037	12.0835	-0.946246	91.1975	-0.0714158
12.9377	142.121	12.0832	-0.945786	91.1956	-0.0713812
12.946	142.207	12.083	-0.945307	91.1937	-0.071345
12.9543	142.289	12.0827	-0.944846	91.1916	-0.0713102
12.9627	142.375	12.0824	-0.944392	91.1895	-0.071276
12.971	142.458	12.0822	-0.943963	91.1875	-0.0712436
12.9793	142.542	12.0819	-0.943528	91.1854	-0.0712108
12.9877	142.623	12.0816	-0.943084	91.1833	-0.0711772
12.996	142.714	12.0813	-0.942632	91.1811	-0.0711431
13.0043	142.794	12.081	-0.942168	91.1791	-0.0711081
13.0127	142.875	12.0808	-0.941731	91.177	-0.0710751
13.021	142.962	12.0805	-0.9413	91.1747	-0.0710426
13.0293	143.044	12.0802	-0.94087	91.1725	-0.0710101
13.0377	143.132	12.0799	-0.94041	91.1704	-0.0709754
13.046	143.218	12.0796	-0.939974	91.1685	-0.0709425
13.0543	143.301	12.0794	-0.939485	91.1664	-0.0709056
13.0627	143.389	12.0791	-0.938999	91.1642	-0.0708689
13.071	143.468	12.0788	-0.938553	91.1621	-0.0708353
13.0793	143.549	12.0786	-0.938098	91.1604	-0.0708009
13.0877	143.631	12.0783	-0.937646	91.1587	-0.0707668
13.096	143.714	12.0781	-0.937203	91.1567	-0.0707333
13.1043	143.799	12.0778	-0.936754	91.1549	-0.0706995
13.1127	143.881	12.0776	-0.93631	91.1531	-0.070666
13.121	143.966	12.0774	-0.935882	91.1515	-0.0706337
13.1293	144.05	12.0771	-0.935448	91.1497	-0.0706009
13.1377	144.137	12.0769	-0.935029	91.1478	-0.0705693
13.146	144.219	12.0767	-0.934636	91.146	-0.0705396
13.1543	144.299	12.0764	-0.934205	91.144	-0.0705071
13.1627	144.386	12.0761	-0.933774	91.142	-0.0704745
13.171	144.471	12.0759	-0.93335	91.1399	-0.0704426
13.1793	144.552	12.0756	-0.932904	91.1381	-0.0704089
13.1877	144.637	12.0754	-0.932477	91.1362	-0.0703767
13.196	144.719	12.0751	-0.932076	91.1343	-0.0703464
13.2043	144.807	12.0748	-0.931648	91.1322	-0.0703141
13.2127	144.887	12.0746	-0.931202	91.1301	-0.0702805
13.221	144.97	12.0743	-0.93077	91.128	-0.0702478
13.2293	145.056	12.074	-0.930356	91.1259	-0.0702166
13.2377	145.142	12.0737	-0.929947	91.1239	-0.0701857
13.246	145.228	12.0735	-0.929508	91.122	-0.0701526
13.2543	145.31	12.0732	-0.929079	91.12	-0.0701203
13.2627	145.391	12.0729	-0.92866	91.1178	-0.0700886
13.271	145.481	12.0727	-0.928214	91.1158	-0.0700549
13.2793	145.56	12.0724	-0.927769	91.1139	-0.0700213
13.2877	145.643	12.0722	-0.927347	91.1121	-0.0699895
13.296	145.726	12.0719	-0.92693	91.1103	-0.069958
13.3043	145.812	12.0717	-0.926502	91.1085	-0.0699257
13.3127	145.898	12.0715	-0.926035	91.1069	-0.0698905
13.321	145.981	12.0712	-0.925591	91.1051	-0.069857
13.3293	146.061	12.071	-0.925159	91.1033	-0.0698244
13.3377	146.149	12.0708	-0.924711	91.1014	-0.0697906
13.346	146.233	12.0705	-0.92427	91.0996	-0.0697573
13.3543	146.317	12.0703	-0.92384	91.0977	-0.0697248
13.3627	146.393	12.07	-0.923426	91.0959	-0.0696936
13.371	146.483	12.0698	-0.922982	91.0941	-0.0696601
13.3793	146.565	12.0695	-0.922542	91.092	-0.0696268
13.3877	146.651	12.0692	-0.922142	91.09	-0.0695967
13.396	146.735	12.069	-0.921737	91.088	-0.0695661
13.4043	146.817	12.0687	-0.921322	91.0861	-0.0695348
13.4127	146.899	12.0685	-0.920922	91.0842	-0.0695046
13.421	146.986	12.0682	-0.92051	91.0824	-0.0694735
13.4293	147.07	12.068	-0.920123	91.0804	-0.0694443
13.4377	147.153	12.0677	-0.919727	91.0785	-0.0694144
13.446	147.235	12.0674	-0.919302	91.0764	-0.0693823
13.4543	147.322	12.0672	-0.918916	91.0743	-0.0693532
13.4627	147.403	12.0669	-0.918513	91.0723	-0.0693228
13.471	147.484	12.0667	-0.918079	91.0705	-0.06929
13.4793	147.572	12.0664	-0.917661	91.0686	-0.0692584
13.4877	147.654	12.0661	-0.91723	91.0666	-0.069226
13.496	147.74	12.0659	-0.916794	91.0645	-0.0691931
13.5043	147.824	12.0656	-0.916392	91.0625	-0.0691627
13.5127	147.905	12.0653	-0.915975	91.0605	-0.0691312
13.521	147.994	12.0651	-0.915565	91.0587	-0.0691003
13.5293	148.081	12.0649	-0.915159	91.0569	-0.0690697
13.5377	148.161	12.0646	-0.914711	91.055	-0.0690358
13.546	148.241	12.0644	-0.914295	91.0533	-0.0690045
13.5543	148.329	12.0641	-0.913902	91.0516	-0.0689747
13.5627	148.413	12.0639	-0.913501	91.0497	-0.0689445
13.571	148.496	12.0637	-0.913088	91.048	-0.0689133
13.5793	148.579	12.0634	-0.912678	91.0463	-0.0688824
13.5877	148.665	12.0632	-0.912276	91.0445	-0.068852
13.596	148.745	12.063	-0.911825	91.0427	-0.068818
13.6043	148.829	12.0628	-0.911382	91.0411	-0.0687846
13.6127	148.915	12.0625	-0.910962	91.0392	-0.0687529
13.621	148.998	12.0623	-0.910587	91.0374	-0.0687246
13.6293	149.078	12.062	-0.910198	91.0355	-0.0686953
13.6377	149.166	12.0618	-0.909769	91.0337	-0.0686629
13.646	149.249	12.0616	-0.909363	91.0319	-0.0686322
13.6543	149.334	12.0613	-0.908973	91.0302	-0.0686028
13.6627	149.421	12.0611	-0.908596	91.0285	-0.0685743
13.671	149.505	12.0609	-0.908198	91.0268	-0.0685443
13.6793	149.586	12.0607	-0.907801	91.0252	-0.0685143
13.6877	149.67	12.0604	-0.907426	91.0234	-0.068486
13.696	149.753	12.0602	-0.90703	91.0217	-0.0684561
13.7043	149.841	12.0599	-0.906596	91.0198	-0.0684234
13.7127	149.918	12.0597	-0.906169	91.0181	-0.0683912
13.721	150.006	12.0595	-0.905775	91.0162	-0.0683614
13.7293	150.086	12.0592	-0.905358	91.0142	-0.0683299
13.7377	150.173	12.059	-0.904969	91.0125	-0.0683006
13.746	150.252	12.0587	-0.904558	91.0106	-0.0682696
13.7543	150.34	12.0585	-0.904151	91.0086	-0.0682388
13.7627	150.425	12.0582	-0.903748	91.0067	-0.0682084
13.771	150.509	12.0579	-0.903354	91.0046	-0.0681787
13.7793	150.588	12.0577	-0.902943	91.0027	-0.0681477
13.7877	150.674	12.0574	-0.902581	91.001	-0.0681203
13.796	150.759	12.0572	-0.902209	90.9994	-0.0680923
13.8043	150.84	12.057	-0.901819	90.9978	-0.0680629
13.8127	150.926	12.0568	-0.901423	90.9962	-0.0680329
13.821	151.014	12.0566	-0.901008	90.9944	-0.0680016
13.8293	151.096	12.0563	-0.900616	90.9925	-0.067972
13.8377	151.18	12.0561	-0.900229	90.9909	-0.0679429
13.846	151.264	12.0559	-0.899857	90.9892	-0.0679148
13.8543	151.348	12.0557	-0.899434	90.9878	-0.0678829
13.8627	151.432	12.0555	-0.89903	90.9862	-0.0678524
13.871	151.514	12.0552	-0.898631	90.9844	-0.0678222
13.8793	151.603	12.055	-0.898214	90.9824	-0.0677908
13.8877	151.687	12.0547	-0.897803	90.9805	-0.0677597
13.896	151.768	12.0545	-0.897426	90.9787	-0.0677313
13.9043	151.853	12.0542	-0.897046	90.9768	-0.0677026
13.9127	151.936	12.054	-0.896653	90.9751	-0.067673
13.921	152.02	12.0538	-0.89627	90.9735	-0.067644
13.9293	152.1	12.0536	-0.895889	90.9718	-0.0676153
13.9377	152.185	12.0534	-0.895515	90.9701	-0.0675871
13.946	152.27	12.0531	-0.895152	90.9684	-0.0675597
13.9543	152.356	12.0529	-0.894767	90.9668	-0.0675306
13.9627	152.439	12.0527	-0.894413	90.9652	-0.0675039
13.971	152.524	12.0525	-0.894019	90.9638	-0.0674742
13.9793	152.606	12.0523	-0.893653	90.9621	-0.0674466
13.9877	152.692	12.0521	-0.893291	90.9606	-0.0674192
13.996	152.773	12.0519	-0.892922	90.9591	-0.0673914
14.0043	152.859	12.0517	-0.892517	90.9574	-0.0673608
14.0127	152.941	12.0515	-0.89215	90.9559	-0.0673331
14.021	153.028	12.0512	-0.891786	90.9542	-0.0673056
14.0293	153.104	12.051	-0.89139	90.9526	-0.0672757
14.0377	153.192	12.0508	-0.891011	90.951	-0.0672471
14.046	153.279	12.0506	-0.89061	90.9493	-0.0672169
14.0543	153.363	12.0504	-0.890243	90.9475	-0.0671892
14.0627	153.446	12.0502	-0.88987	90.9459	-0.067161
14.071	153.529	12.0499	-0.889448	90.9441	-0.0671291
14.0793	153.614	12.0497	-0.889068	90.9424	-0.0671005
14.0877	153.701	12.0494	-0.888668	90.9405	-0.0670703
14.096	153.786	12.0492	-0.888255	90.9387	-0.0670391
14.1043	153.866	12.049	-0.887859	90.9369	-0.0670093
14.1127	153.952	12.0487	-0.887505	90.9351	-0.0669825
14.121	154.036	12.0485	-0.887128	90.9333	-0.0669541
14.1293	154.116	12.0482	-0.886768	90.9316	-0.0669269
14.1377	154.202	12.048	-0.886423	90.93	-0.0669009
14.146	154.277	12.0478	-0.886032	90.928	-0.0668713
14.1543	154.369	12.0475	-0.88566	90.9263	-0.0668433
14.1627	154.455	12.0473	-0.885284	90.9245	-0.0668149
14.171	154.537	12.0471	-0.884973	90.9229	-0.0667914
14.1793	154.618	12.0469	-0.884652	90.9211	-0.0667672
14.1877	154.702	12.0466	-0.884289	90.9193	-0.0667398
14.196	154.784	12.0464	-0.883891	90.9178	-0.0667097
14.2043	154.869	12.0462	-0.883507	90.9164	-0.0666808
14.2127	154.953	12.046	-0.883118	90.9149	-0.0666514
14.221	155.035	12.0458	-0.882736	90.9131	-0.0666226
14.2293	155.123	12.0456	-0.882354	90.9116	-0.0665937
14.2377	155.208	12.0454	-0.881998	90.9102	-0.0665669
14.246	155.287	12.0452	-0.881622	90.9085	-0.0665385
14.2543	155.372	12.045	-0.881223	90.9068	-0.0665084
14.2627	155.457	12.0448	-0.880848	90.9053	-0.0664801
14.271	155.539	12.0446	-0.880501	90.9039	-0.0664539
14.2793	155.622	12.0443	-0.880165	90.9021	-0.0664285
14.2877	155.71	12.0441	-0.879791	90.9002	-0.0664003
14.296	155.793	12.0439	-0.879448	90.8984	-0.0663744
14.3043	155.875	12.0437	-0.879076	90.8969	-0.0663464
14.3127	155.959	12.0434	-0.878698	90.895	-0.0663178
14.321	156.043	12.0432	-0.87837	90.8932	-0.0662931
14.3293	156.132	12.0429	-0.878014	90.8916	-0.0662662
14.3377	156.21	12.0427	-0.877642	90.8901	-0.0662381
14.346	156.298	12.0425	-0.877276	90.8884	-0.0662105
14.3543	156.381	12.0423	-0.876896	90.8867	-0.0661818
14.3627	156.467	12.0421	-0.87653	90.8852	-0.0661542
14.371	156.549	12.0419	-0.876206	90.8837	-0.0661297
14.3793	156.633	12.0417	-0.875841	90.8822	-0.0661022
14.3877	156.719	12.0415	-0.875486	90.8806	-0.0660754
14.396	156.802	12.0413	-0.875163	90.879	-0.066051
14.4043	156.884	12.0411	-0.874773	90.8773	-0.0660216
14.4127	156.967	12.0409	-0.874417	90.8759	-0.0659948
14.421	157.051	12.0406	-0.874074	90.8742	-0.0659688
14.4293	157.132	12.0404	-0.873696	90.8725	-0.0659403
14.4377	157.218	12.0402	-0.87333	90.8707	-0.0659127
14.446	157.304	12.0399	-0.872969	90.8689	-0.0658855
14.4543	157.387	12.0397	-0.87261	90.8672	-0.0658583
14.4627	157.473	12.0395	-0.87222	90.8654	-0.0658289
14.471	157.556	12.0393	-0.871873	90.8637	-0.0658028
14.4793	157.638	12.039	-0.871478	90.8621	-0.0657729
14.4877	157.724	12.0388	-0.871123	90.8604	-0.0657461
14.496	157.81	12.0386	-0.87079	90.8586	-0.065721
14.5043	157.892	12.0384	-0.870472	90.857	-0.065697
14.5127	157.977	12.0382	-0.870144	90.8555	-0.0656723
14.521	158.06	12.038	-0.869823	90.8542	-0.065648
14.5293	158.143	12.0378	-0.86948	90.8527	-0.0656221
14.5377	158.223	12.0376	-0.869124	90.8512	-0.0655953
14.546	158.309	12.0374	-0.868788	90.8495	-0.0655699
14.5543	158.39	12.0372	-0.868447	90.8479	-0.0655442
14.5627	158.474	12.037	-0.868128	90.8466	-0.06552
14.571	158.56	12.0368	-0.867779	90.8452	-0.0654937
14.5793	158.644	12.0366	-0.867416	90.8438	-0.0654663
14.5877	158.729	12.0364	-0.867057	90.8423	-0.0654393
14.596	158.814	12.0362	-0.866708	90.8407	-0.0654129
14.6043	158.897	12.036	-0.866351	90.839	-0.065386
14.6127	158.979	12.0358	-0.865994	90.8374	-0.0653591
14.621	159.061	12.0356	-0.865654	90.8359	-0.0653333
14.6293	159.145	12.0354	-0.865336	90.8343	-0.0653093
14.6377	159.232	12.0351	-0.864973	90.8326	-0.065282
14.646	159.313	12.0349	-0.864627	90.831	-0.0652559
14.6543	159.397	12.0347	-0.864326	90.8292	-0.0652332
14.6627	159.482	12.0345	-0.863981	90.8276	-0.0652071
14.671	159.566	12.0343	-0.863638	90.826	-0.0651812
14.6793	159.653	12.034	-0.86329	90.8243	-0.065155
14.6877	159.733	12.0338	-0.862986	90.8227	-0.065132
14.696	159.815	12.0336	-0.862667	90.8211	-0.0651079
14.7043	159.902	12.0334	-0.862324	90.8196	-0.065082
14.7127	159.982	12.0332	-0.861961	90.8181	-0.0650546
14.721	160.071	12.033	-0.861658	90.8168	-0.0650317
14.7293	160.15	12.0328	-0.861352	90.8153	-0.0650087
14.7377	160.236	12.0327	-0.860977	90.814	-0.0649803
14.746	160.317	12.0325	-0.860658	90.8125	-0.0649563
14.7543	160.403	12.0323	-0.860335	90.8111	-0.0649319
14.7627	160.488	12.0321	-0.859999	90.8097	-0.0649066
14.771	160.571	12.0319	-0.859637	90.8082	-0.0648792
14.7793	160.655	12.0317	-0.859295	90.8067	-0.0648535
14.7877	160.74	12.0315	-0.858945	90.8052	-0.064827
14.796	160.822	12.0313	-0.858627	90.8039	-0.064803
14.8043	160.906	12.0311	-0.858254	90.8024	-0.0647749
14.8127	160.991	12.0309	-0.857888	90.8008	-0.0647473
14.821	161.069	12.0307	-0.857565	90.7993	-0.0647229
14.8293	161.154	12.0305	-0.857219	90.7979	-0.0646967
14.8377	161.243	12.0303	-0.856879	90.7964	-0.0646711
14.846	161.324	12.0301	-0.856547	90.7949	-0.064646
14.8543	161.41	12.0299	-0.856222	90.7933	-0.0646215
14.8627	161.492	12.0297	-0.855922	90.7917	-0.0645989
14.871	161.574	12.0295	-0.855619	90.7902	-0.064576
14.8793	161.658	12.0293	-0.855328	90.7887	-0.064554
14.8877	161.747	12.0291	-0.855054	90.7873	-0.0645334
14.896	161.829	12.0289	-0.854736	90.7858	-0.0645094
14.9043	161.912	12.0287	-0.854404	90.7842	-0.0644843
14.9127	161.998	12.0285	-0.854091	90.7827	-0.0644607
14.921	162.081	12.0283	-0.853759	90.7811	-0.0644356
14.9293	162.167	12.0281	-0.85343	90.7797	-0.0644108
14.9377	162.25	12.0279	-0.853091	90.7783	-0.0643852
14.946	162.331	12.0278	-0.852754	90.7769	-0.0643598
14.9543	162.413	12.0276	-0.852428	90.7755	-0.0643351
14.9627	162.499	12.0274	-0.852109	90.7738	-0.0643111
14.971	162.582	12.0272	-0.851768	90.7723	-0.0642853
14.9793	162.665	12.0269	-0.851475	90.7707	-0.0642632
14.9877	162.748	12.0267	-0.85119	90.7692	-0.0642417
14.996	162.828	12.0265	-0.850889	90.7677	-0.064219
15.0043	162.913	12.0263	-0.850573	90.7661	-0.0641952
15.0127	162.997	12.0261	-0.850273	90.7645	-0.0641725
15.021	163.087	12.0259	-0.849954	90.7631	-0.0641484
15.0293	163.169	12.0257	-0.849642	90.7615	-0.0641249
15.0377	163.248	12.0255	-0.849325	90.7599	-0.064101
15.046	163.332	12.0253	-0.848994	90.7587	-0.064076
15.0543	163.416	12.0252	-0.848639	90.7574	-0.0640492
15.0627	163.502	12.025	-0.848294	90.7561	-0.0640231
15.071	163.584	12.0248	-0.847956	90.7546	-0.0639977
15.0793	163.668	12.0246	-0.847636	90.7531	-0.0639735
15.0877	163.752	12.0244	-0.847333	90.7516	-0.0639507
15.096	163.837	12.0242	-0.846988	90.7504	-0.0639246
15.1043	163.917	12.024	-0.846689	90.7488	-0.063902
15.1127	164.005	12.0238	-0.846353	90.7474	-0.0638767
15.121	164.087	12.0237	-0.846047	90.746	-0.0638536
15.1293	164.173	12.0235	-0.845725	90.7445	-0.0638293
15.1377	164.256	12.0232	-0.845453	90.7428	-0.0638087
15.146	164.337	12.023	-0.845179	90.7413	-0.063788
15.1543	164.42	12.0229	-0.844889	90.74	-0.0637662
15.1627	164.5	12.0227	-0.844575	90.7387	-0.0637424
15.171	164.593	12.0225	-0.844269	90.7372	-0.0637194
15.1793	164.674	12.0223	-0.843999	90.7359	-0.063699
15.1877	164.755	12.0221	-0.843691	90.7345	-0.0636758
15.196	164.838	12.022	-0.843399	90.7332	-0.0636537
15.2043	164.922	12.0218	-0.843091	90.7319	-0.0636304
15.2127	165.01	12.0216	-0.842781	90.7306	-0.0636071
15.221	165.093	12.0214	-0.842469	90.7292	-0.0635835
15.2293	165.178	12.0212	-0.842122	90.7277	-0.0635574
15.2377	165.256	12.0211	-0.841802	90.7264	-0.0635332
15.246	165.34	12.0209	-0.841506	90.7252	-0.0635109
15.2543	165.427	12.0207	-0.841186	90.7239	-0.0634867
15.2627	165.514	12.0206	-0.840869	90.7226	-0.0634628
15.271	165.595	12.0204	-0.840539	90.7211	-0.0634379
15.2793	165.681	12.0201	-0.840205	90.7194	-0.0634127
15.2877	165.761	12.0199	-0.839884	90.7179	-0.0633884
15.296	165.849	12.0197	-0.839573	90.7162	-0.0633649
15.3043	165.933	12.0195	-0.839284	90.7149	-0.0633432
15.3127	166.013	12.0194	-0.838998	90.7136	-0.0633216
15.321	166.098	12.0191	-0.838676	90.7119	-0.0632972
15.3293	166.18	12.0189	-0.838338	90.7102	-0.0632717
15.3377	166.265	12.0187	-0.838018	90.7085	-0.0632476
15.346	166.345	12.0185	-0.837729	90.7072	-0.0632258
15.3543	166.432	12.0183	-0.83746	90.7058	-0.0632055
15.3627	166.514	12.0182	-0.837167	90.7046	-0.0631834
15.371	166.592	12.018	-0.836892	90.7033	-0.0631626
15.3793	166.679	12.0178	-0.836614	90.7018	-0.0631416
15.3877	166.762	12.0176	-0.836326	90.7003	-0.0631199
15.396	166.845	12.0174	-0.836044	90.6989	-0.0630986
15.4043	166.928	12.0173	-0.835779	90.6976	-0.0630786
15.4127	167.013	12.0171	-0.835495	90.6962	-0.0630571
15.421	167.097	12.0169	-0.835195	90.695	-0.0630345
15.4293	167.182	12.0167	-0.834875	90.6935	-0.0630104
15.4377	167.263	12.0165	-0.834588	90.6922	-0.0629887
15.446	167.348	12.0163	-0.834285	90.6908	-0.0629659
15.4543	167.431	12.0162	-0.833979	90.6896	-0.0629428
15.4627	167.518	12.016	-0.833677	90.6882	-0.06292
15.471	167.602	12.0158	-0.83339	90.6868	-0.0628983
15.4793	167.682	12.0156	-0.833074	90.6854	-0.0628745
15.4877	167.767	12.0155	-0.832778	90.6841	-0.0628521
15.496	167.853	12.0153	-0.832508	90.6827	-0.0628317
15.5043	167.937	12.0151	-0.832262	90.6814	-0.0628131
15.5127	168.016	12.0149	-0.831985	90.6799	-0.0627922
15.521	168.098	12.0147	-0.831668	90.6785	-0.0627683
15.5293	168.184	12.0145	-0.831403	90.6771	-0.0627483
15.5377	168.264	12.0143	-0.8311	90.6756	-0.0627255
15.546	168.35	12.0142	-0.830834	90.6742	-0.0627054
15.5543	168.433	12.014	-0.830527	90.6729	-0.0626823
15.5627	168.517	12.0138	-0.830253	90.6716	-0.0626616
15.571	168.599	12.0136	-0.829971	90.6702	-0.0626403
15.5793	168.685	12.0134	-0.829689	90.6688	-0.062619
15.5877	168.772	12.0133	-0.829393	90.6676	-0.0625967
15.596	168.853	12.0131	-0.82911	90.6663	-0.0625753
15.6043	168.938	12.0129	-0.828837	90.6649	-0.0625547
15.6127	169.021	12.0128	-0.828539	90.6636	-0.0625322
15.621	169.101	12.0126	-0.828282	90.6623	-0.0625128
15.6293	169.192	12.0124	-0.827959	90.6612	-0.0624884
15.6377	169.276	12.0123	-0.827644	90.66	-0.0624646
15.646	169.356	12.0121	-0.827352	90.6588	-0.0624426
15.6543	169.438	12.012	-0.827076	90.6576	-0.0624218
15.6627	169.523	12.0118	-0.826773	90.6565	-0.0623989
15.671	169.608	12.0116	-0.826484	90.6551	-0.0623771
15.6793	169.699	12.0114	-0.826207	90.6537	-0.0623562
15.6877	169.778	12.0113	-0.825919	90.6523	-0.0623344
15.696	169.861	12.0111	-0.825647	90.651	-0.062314
15.7043	169.946	12.0109	-0.825312	90.6496	-0.0622887
15.7127	170.027	12.0107	-0.825019	90.6481	-0.0622665
15.721	170.109	12.0105	-0.824729	90.6465	-0.0622446
15.7293	170.198	12.0103	-0.824453	90.6451	-0.0622238
15.7377	170.28	12.0101	-0.824168	90.6436	-0.0622023
15.746	170.367	12.0099	-0.823878	90.6418	-0.0621804
15.7543	170.448	12.0097	-0.823587	90.6403	-0.0621585
15.7627	170.528	12.0095	-0.823291	90.6391	-0.0621361
15.771	170.613	12.0093	-0.82303	90.6378	-0.0621164
15.7793	170.701	12.0091	-0.822736	90.6362	-0.0620943
15.7877	170.781	12.0089	-0.822477	90.6349	-0.0620747
15.796	170.862	12.0088	-0.82224	90.6336	-0.0620568
15.8043	170.948	12.0086	-0.822003	90.6323	-0.0620389
15.8127	171.036	12.0084	-0.821739	90.6309	-0.062019
15.821	171.115	12.0082	-0.821462	90.6296	-0.0619981
15.8293	171.203	12.0081	-0.821194	90.6285	-0.0619778
15.8377	171.286	12.0079	-0.820925	90.6272	-0.0619576
15.846	171.372	12.0077	-0.820648	90.6259	-0.0619366
15.8543	171.452	12.0076	-0.820334	90.6248	-0.0619129
15.8627	171.538	12.0075	-0.820072	90.6237	-0.0618932
15.871	171.619	12.0073	-0.819824	90.6223	-0.0618744
15.8793	171.702	12.0071	-0.819531	90.6211	-0.0618523
15.8877	171.792	12.0069	-0.819228	90.6198	-0.0618295
15.896	171.871	12.0068	-0.818926	90.6185	-0.0618066
15.9043	171.957	12.0066	-0.818622	90.6172	-0.0617837
15.9127	172.038	12.0064	-0.818338	90.6159	-0.0617623
15.921	172.122	12.0062	-0.818055	90.6143	-0.0617409
15.9293	172.208	12.006	-0.817746	90.6128	-0.0617176
15.9377	172.287	12.0058	-0.817464	90.6113	-0.0616964
15.946	172.374	12.0057	-0.817174	90.6101	-0.0616745
15.9543	172.457	12.0055	-0.816884	90.609	-0.0616526
15.9627	172.543	12.0053	-0.816606	90.6076	-0.0616316
15.971	172.626	12.0052	-0.816338	90.6065	-0.0616113
15.9793	172.711	12.005	-0.816082	90.6054	-0.061592
15.9877	172.788	12.0049	-0.815782	90.6042	-0.0615694
15.996	172.873	12.0047	-0.815514	90.603	-0.0615492
16.0043	172.956	12.0046	-0.815267	90.6019	-0.0615305
16.0127	173.041	12.0044	-0.815029	90.6008	-0.0615126
16.021	173.127	12.0043	-0.814787	90.5995	-0.0614943
16.0293	173.208	12.0041	-0.814548	90.598	-0.0614763
16.0377	173.291	12.0039	-0.814295	90.5967	-0.0614572
16.046	173.375	12.0037	-0.814013	90.5955	-0.0614359
16.0543	173.456	12.0035	-0.813738	90.5941	-0.0614151
16.0627	173.542	12.0033	-0.813455	90.5927	-0.0613937
16.071	173.629	12.0032	-0.813233	90.5915	-0.061377
16.0793	173.71	12.003	-0.812946	90.5901	-0.0613554
16.0877	173.797	12.0028	-0.812629	90.5887	-0.0613314
16.096	173.879	12.0026	-0.812325	90.5873	-0.0613085
16.1043	173.966	12.0024	-0.812054	90.5859	-0.061288
16.1127	174.045	12.0023	-0.811755	90.5845	-0.0612655
16.121	174.129	12.0021	-0.811437	90.583	-0.0612414
16.1293	174.21	12.0019	-0.811155	90.5814	-0.0612201
16.1377	174.295	12.0017	-0.810882	90.5802	-0.0611996
16.146	174.378	12.0015	-0.810592	90.5788	-0.0611776
16.1543	174.457	12.0013	-0.810293	90.5773	-0.0611551
16.1627	174.547	12.0011	-0.810028	90.5759	-0.0611351
16.171	174.628	12.0009	-0.809778	90.5746	-0.0611163
16.1793	174.71	12.0008	-0.809538	90.5734	-0.0610981
16.1877	174.798	12.0006	-0.809251	90.5722	-0.0610765
16.196	174.882	12.0005	-0.808968	90.5708	-0.0610551
16.2043	174.963	12.0003	-0.808711	90.5697	-0.0610357
16.2127	175.05	12.0001	-0.808447	90.5685	-0.0610158
16.221	175.132	12	-0.808178	90.5673	-0.0609955
16.2293	175.214	11.9998	-0.807952	90.5659	-0.0609784
16.2377	175.297	11.9997	-0.807709	90.5649	-0.0609601
16.246	175.376	11.9995	-0.807471	90.5639	-0.0609421
16.2543	175.466	11.9994	-0.8072	90.5627	-0.0609216
16.2627	175.546	11.9992	-0.806924	90.5614	-0.0609008
16.271	175.628	11.999	-0.806688	90.5602	-0.060883
16.2793	175.718	11.9989	-0.806466	90.5591	-0.0608663
16.2877	175.798	11.9987	-0.806211	90.5578	-0.060847
16.296	175.883	11.9986	-0.805963	90.5565	-0.0608283
16.3043	175.964	11.9984	-0.80572	90.5553	-0.0608099
16.3127	176.049	11.9983	-0.805442	90.5543	-0.060789
16.321	176.131	11.9981	-0.805171	90.5531	-0.0607686
16.3293	176.213	11.998	-0.804893	90.552	-0.0607476
16.3377	176.303	11.9978	-0.804633	90.5506	-0.0607279
16.346	176.384	11.9976	-0.804387	90.5491	-0.0607094
16.3543	176.465	11.9974	-0.804117	90.5479	-0.060689
16.3627	176.553	11.9972	-0.803812	90.5466	-0.060666
16.371	176.633	11.9971	-0.803564	90.5455	-0.0606473
16.3793	176.718	11.9969	-0.803314	90.5443	-0.0606284
16.3877	176.799	11.9968	-0.803048	90.5431	-0.0606083
16.396	176.883	11.9966	-0.80281	90.5417	-0.0605904
16.4043	176.968	11.9964	-0.802564	90.5404	-0.0605718
16.4127	177.054	11.9962	-0.802302	90.539	-0.060552
16.421	177.137	11.9961	-0.802086	90.538	-0.0605357
16.4293	177.222	11.996	-0.801835	90.5371	-0.0605168
16.4377	177.305	11.9958	-0.801595	90.5359	-0.0604986
16.446	177.388	11.9957	-0.801367	90.5348	-0.0604815
16.4543	177.468	11.9955	-0.801134	90.5337	-0.0604638
16.4627	177.553	11.9954	-0.800862	90.5326	-0.0604433
16.471	177.634	11.9952	-0.800615	90.5313	-0.0604247
16.4793	177.719	11.995	-0.800341	90.53	-0.060404
16.4877	177.804	11.9949	-0.800089	90.529	-0.060385
16.496	177.894	11.9947	-0.79985	90.5277	-0.0603669
16.5043	177.976	11.9946	-0.799575	90.5265	-0.0603462
16.5127	178.056	11.9944	-0.799338	90.5253	-0.0603283
16.521	178.14	11.9942	-0.799073	90.5239	-0.0603083
16.5293	178.222	11.9941	-0.798803	90.5226	-0.0602879
16.5377	178.307	11.9939	-0.798519	90.5212	-0.0602665
16.546	178.392	11.9937	-0.79827	90.5199	-0.0602477
16.5543	178.475	11.9935	-0.798007	90.5186	-0.0602279
16.5627	178.559	11.9934	-0.797761	90.5174	-0.0602093
16.571	178.641	11.9932	-0.797478	90.516	-0.0601879
16.5793	178.726	11.993	-0.797192	90.5146	-0.0601663
16.5877	178.812	11.9928	-0.796926	90.5134	-0.0601463
16.596	178.895	11.9927	-0.796647	90.5122	-0.0601252
16.6043	178.977	11.9925	-0.796409	90.5112	-0.0601072
16.6127	179.062	11.9924	-0.79616	90.5099	-0.0600885
16.621	179.142	11.9922	-0.795931	90.5087	-0.0600712
16.6293	179.228	11.9921	-0.795699	90.5075	-0.0600537
16.6377	179.311	11.9919	-0.795464	90.5063	-0.060036
16.646	179.395	11.9917	-0.795211	90.5051	-0.0600168
[truncated: 9,897 more rows]
