# Supplementary material for: Comparative study on mechanisms for improving mechanical properties and microstructure of cement paste modified by different types of nanomaterials
Source: publisher site journal article supplement (doi:10.1515/ntrev-2021-0027), 2021-01-01
Supplement: Supplementary file 17 [file NT-2-28d.xlsx]

## Sheet: Sheet1
Time (min)	Temperature (°C)	Weight (mg)			Temperature Difference (°C/mg)
0.0008	22.2319	13.6999	-0.796491	100	-0.0581383
0.00433333	22.2814	13.7	-0.794307	100	-0.0579788
0.0126667	22.3284	13.6999	-0.794332	99.9995	-0.0579807
0.021	22.3656	13.6997	-0.794287	99.9983	-0.0579774
0.0293333	22.409	13.6996	-0.794208	99.9972	-0.0579716
0.0376667	22.4509	13.6994	-0.794097	99.9961	-0.0579635
0.046	22.4857	13.6992	-0.793962	99.9946	-0.0579536
0.0543333	22.5311	13.699	-0.793816	99.993	-0.057943
0.0626667	22.5728	13.6988	-0.793617	99.9912	-0.0579284
0.071	22.6117	13.6985	-0.793386	99.9894	-0.0579116
0.0793333	22.657	13.6982	-0.793156	99.9874	-0.0578948
0.0876667	22.6898	13.698	-0.792849	99.9854	-0.0578724
0.096	22.7267	13.6977	-0.792561	99.9834	-0.0578514
0.104333	22.7752	13.6974	-0.792295	99.9813	-0.057832
0.112667	22.8176	13.6971	-0.792103	99.9791	-0.0578179
0.121	22.8562	13.6968	-0.79193	99.9768	-0.0578053
0.129333	22.8977	13.6964	-0.791752	99.9744	-0.0577923
0.137667	22.9339	13.6961	-0.791597	99.972	-0.057781
0.146	22.972	13.6958	-0.791492	99.9694	-0.0577733
0.154333	23.0117	13.6954	-0.791423	99.9669	-0.0577683
0.162667	23.0536	13.6951	-0.791341	99.9642	-0.0577623
0.171	23.0903	13.6947	-0.7913	99.9615	-0.0577593
0.179333	23.13	13.6943	-0.791317	99.9587	-0.0577605
0.187667	23.1689	13.6939	-0.791379	99.9561	-0.0577651
0.196	23.2004	13.6935	-0.791427	99.9532	-0.0577686
0.204333	23.244	13.6931	-0.791469	99.9504	-0.0577717
0.212667	23.2842	13.6928	-0.791589	99.9476	-0.0577804
0.221	23.3206	13.6924	-0.791731	99.9446	-0.0577908
0.229333	23.3561	13.692	-0.791846	99.9417	-0.0577992
0.237667	23.3873	13.6916	-0.791983	99.9388	-0.0578092
0.246	23.4279	13.6912	-0.792224	99.936	-0.0578268
0.254333	23.4688	13.6908	-0.792484	99.9331	-0.0578457
0.262667	23.4965	13.6904	-0.792701	99.9303	-0.0578616
0.271	23.5362	13.69	-0.79295	99.9273	-0.0578798
0.279333	23.5734	13.6896	-0.793228	99.9245	-0.0579001
0.287667	23.6083	13.6892	-0.793556	99.9216	-0.057924
0.296	23.6409	13.6888	-0.793855	99.9187	-0.0579459
0.304333	23.6841	13.6884	-0.794167	99.916	-0.0579686
0.312667	23.7152	13.6881	-0.794586	99.9133	-0.0579992
0.321	23.7521	13.6877	-0.79502	99.9103	-0.0580309
0.329333	23.7926	13.6872	-0.795391	99.9072	-0.0580579
0.337667	23.8317	13.6868	-0.795792	99.9042	-0.0580872
0.346	23.8626	13.6864	-0.796263	99.9012	-0.0581216
0.354333	23.895	13.686	-0.796769	99.8981	-0.0581585
0.362667	23.9281	13.6856	-0.797228	99.8952	-0.0581921
0.371	23.9639	13.6851	-0.797739	99.8919	-0.0582294
0.379333	24.002	13.6847	-0.79829	99.8888	-0.0582695
0.387667	24.033	13.6843	-0.79884	99.8854	-0.0583097
0.396	24.0713	13.6838	-0.799364	99.8819	-0.0583479
0.404333	24.1067	13.6833	-0.799905	99.8785	-0.0583874
0.412667	24.1356	13.6828	-0.800508	99.8751	-0.0584315
0.421	24.173	13.6824	-0.801094	99.8718	-0.0584743
0.429333	24.2042	13.6819	-0.80167	99.8683	-0.0585163
0.437667	24.2399	13.6814	-0.802249	99.8648	-0.0585586
0.446	24.2752	13.681	-0.802876	99.8614	-0.0586043
0.454333	24.3136	13.6805	-0.803498	99.8582	-0.0586497
0.462667	24.3465	13.6801	-0.80411	99.8548	-0.0586943
0.471	24.381	13.6796	-0.80476	99.8514	-0.0587418
0.479333	24.4099	13.6792	-0.805419	99.8482	-0.05879
0.487667	24.4518	13.6787	-0.806109	99.845	-0.0588403
0.496	24.475	13.6782	-0.806791	99.8415	-0.0588901
0.504333	24.5148	13.6778	-0.807468	99.838	-0.0589395
0.512667	24.5505	13.6773	-0.808141	99.8346	-0.0589886
0.521	24.5827	13.6768	-0.808882	99.831	-0.0590427
0.529333	24.6148	13.6763	-0.809624	99.8274	-0.0590969
0.537667	24.6524	13.6758	-0.810389	99.8235	-0.0591527
0.546	24.6918	13.6753	-0.811165	99.8199	-0.0592094
0.554333	24.7298	13.6748	-0.811938	99.8163	-0.0592657
0.562667	24.7569	13.6743	-0.812716	99.8128	-0.0593226
0.571	24.7979	13.6738	-0.81352	99.8092	-0.0593813
0.579333	24.8276	13.6733	-0.814361	99.8057	-0.0594426
0.587667	24.8637	13.6728	-0.815215	99.802	-0.059505
0.596	24.8981	13.6723	-0.816041	99.7985	-0.0595653
0.604333	24.9373	13.6719	-0.816834	99.795	-0.0596232
0.612667	24.974	13.6714	-0.817681	99.7914	-0.059685
0.621	25.0039	13.6709	-0.818509	99.7878	-0.0597454
0.629333	25.0444	13.6704	-0.819372	99.7843	-0.0598084
0.637667	25.074	13.6699	-0.820221	99.7806	-0.0598704
0.646	25.1208	13.6694	-0.821102	99.7767	-0.0599347
0.654333	25.1561	13.6689	-0.821954	99.773	-0.0599968
0.662667	25.1888	13.6683	-0.822777	99.7693	-0.060057
0.671	25.2303	13.6678	-0.823631	99.7656	-0.0601192
0.679333	25.2624	13.6673	-0.824548	99.7618	-0.0601862
0.687667	25.3053	13.6668	-0.82548	99.7582	-0.0602543
0.696	25.34	13.6663	-0.826377	99.7545	-0.0603197
0.704333	25.3784	13.6658	-0.827299	99.7506	-0.060387
0.712667	25.4192	13.6652	-0.828222	99.7466	-0.0604544
0.721	25.461	13.6647	-0.829206	99.7426	-0.0605262
0.729333	25.4991	13.6641	-0.830184	99.7386	-0.0605976
0.737667	25.5418	13.6636	-0.831181	99.7347	-0.0606704
0.746	25.5745	13.6631	-0.832204	99.7309	-0.0607451
0.754333	25.6176	13.6625	-0.833213	99.727	-0.0608187
0.762667	25.6572	13.662	-0.834228	99.7232	-0.0608928
0.771	25.698	13.6615	-0.835242	99.7192	-0.0609668
0.779333	25.7382	13.6609	-0.836297	99.7153	-0.0610438
0.787667	25.7768	13.6604	-0.837341	99.7116	-0.06112
0.796	25.8182	13.66	-0.838381	99.708	-0.0611959
0.804333	25.8601	13.6595	-0.839404	99.7045	-0.0612706
0.812667	25.9015	13.6589	-0.840448	99.7007	-0.0613468
0.821	25.9489	13.6584	-0.841488	99.6966	-0.0614227
0.829333	25.9977	13.6578	-0.842576	99.6926	-0.0615021
0.837667	26.0338	13.6573	-0.843685	99.6888	-0.0615831
0.846	26.085	13.6568	-0.844809	99.6848	-0.0616651
0.854333	26.1266	13.6562	-0.845906	99.681	-0.0617452
0.862667	26.1662	13.6557	-0.84701	99.6769	-0.0618258
0.871	26.2145	13.6551	-0.848135	99.6727	-0.0619079
0.879333	26.2614	13.6545	-0.849277	99.6684	-0.0619912
0.887667	26.3053	13.6539	-0.850444	99.664	-0.0620765
0.896	26.3482	13.6533	-0.851629	99.6596	-0.0621629
0.904333	26.393	13.6528	-0.852832	99.6555	-0.0622507
0.912667	26.4403	13.6522	-0.853977	99.6515	-0.0623343
0.921	26.4885	13.6517	-0.855157	99.6475	-0.0624205
0.929333	26.5317	13.6511	-0.856331	99.6433	-0.0625062
0.937667	26.5881	13.6505	-0.857549	99.6389	-0.0625951
0.946	26.6349	13.6499	-0.858744	99.6347	-0.0626823
0.954333	26.6842	13.6493	-0.860001	99.6303	-0.062774
0.962667	26.7246	13.6487	-0.861233	99.6262	-0.062864
0.971	26.7792	13.6482	-0.862496	99.6223	-0.0629562
0.979333	26.8294	13.6477	-0.863738	99.6185	-0.0630468
0.987667	26.8725	13.6471	-0.864994	99.6142	-0.0631385
0.996	26.9274	13.6465	-0.866319	99.6099	-0.0632352
1.00433	26.979	13.6459	-0.867659	99.6056	-0.063333
1.01267	27.0285	13.6453	-0.868996	99.6014	-0.0634306
1.021	27.0789	13.6448	-0.870354	99.5971	-0.0635297
1.02933	27.1388	13.6441	-0.871685	99.5927	-0.0636269
1.03767	27.1932	13.6436	-0.873016	99.5885	-0.063724
1.046	27.2388	13.643	-0.874385	99.5842	-0.063824
1.05433	27.2985	13.6424	-0.875749	99.5796	-0.0639235
1.06267	27.3474	13.6418	-0.877189	99.5753	-0.0640286
1.071	27.3956	13.6411	-0.878638	99.5707	-0.0641344
1.07933	27.4567	13.6405	-0.880023	99.5661	-0.0642355
1.08767	27.5103	13.6398	-0.881413	99.5613	-0.064337
1.096	27.5642	13.6392	-0.882803	99.5565	-0.0644384
1.10433	27.6228	13.6386	-0.884196	99.552	-0.0645401
1.11267	27.6816	13.638	-0.88566	99.5475	-0.064647
1.121	27.7369	13.6373	-0.887066	99.5429	-0.0647496
1.12933	27.7911	13.6367	-0.88852	99.5386	-0.0648557
1.13767	27.8514	13.6361	-0.889962	99.5342	-0.064961
1.146	27.8956	13.6355	-0.891374	99.5296	-0.065064
1.15433	27.9566	13.6349	-0.892841	99.525	-0.0651711
1.16267	28.0191	13.6342	-0.894371	99.5204	-0.0652828
1.171	28.0769	13.6336	-0.895902	99.5161	-0.0653946
1.17933	28.1318	13.633	-0.897451	99.5116	-0.0655076
1.18767	28.1998	13.6324	-0.899003	99.5068	-0.0656209
1.196	28.2566	13.6318	-0.900612	99.5023	-0.0657383
1.20433	28.3192	13.6311	-0.902213	99.4977	-0.0658552
1.21267	28.3712	13.6304	-0.903794	99.4926	-0.0659706
1.221	28.4355	13.6298	-0.905399	99.4877	-0.0660878
1.22933	28.4998	13.6291	-0.906974	99.4828	-0.0662028
1.23767	28.5597	13.6284	-0.908562	99.478	-0.0663187
1.246	28.6163	13.6278	-0.910159	99.473	-0.0664352
1.25433	28.6871	13.6271	-0.91177	99.4679	-0.0665528
1.26267	28.7455	13.6264	-0.913377	99.4631	-0.0666701
1.271	28.8145	13.6257	-0.915025	99.4582	-0.0667904
1.27933	28.8737	13.625	-0.916637	99.4533	-0.0669081
1.28767	28.937	13.6244	-0.91832	99.4482	-0.0670309
1.296	29.0011	13.6237	-0.92003	99.4431	-0.0671557
1.30433	29.0673	13.623	-0.921739	99.438	-0.0672805
1.31267	29.1357	13.6223	-0.923483	99.4329	-0.0674078
1.321	29.2036	13.6216	-0.925197	99.4279	-0.0675329
1.32933	29.2698	13.6209	-0.926931	99.423	-0.0676594
1.33767	29.3364	13.6202	-0.928666	99.4181	-0.0677861
1.346	29.4014	13.6195	-0.930439	99.413	-0.0679155
1.35433	29.4633	13.6188	-0.932184	99.4077	-0.0680429
1.36267	29.5371	13.6181	-0.933952	99.4025	-0.068172
1.371	29.6031	13.6174	-0.935747	99.3973	-0.0683029
1.37933	29.674	13.6167	-0.937538	99.3923	-0.0684337
1.38767	29.7412	13.616	-0.939333	99.3872	-0.0685647
1.396	29.8104	13.6153	-0.941113	99.3822	-0.0686946
1.40433	29.8762	13.6146	-0.942917	99.3771	-0.0688263
1.41267	29.947	13.6139	-0.944753	99.3718	-0.0689603
1.421	30.0146	13.6132	-0.94656	99.3665	-0.0690922
1.42933	30.0829	13.6124	-0.948396	99.3612	-0.0692262
1.43767	30.16	13.6117	-0.950275	99.3559	-0.0693634
1.446	30.2274	13.611	-0.952171	99.3506	-0.0695018
1.45433	30.2967	13.6103	-0.954058	99.3453	-0.0696395
1.46267	30.3708	13.6095	-0.955921	99.3396	-0.0697755
1.471	30.4462	13.6087	-0.957839	99.3341	-0.0699155
1.47933	30.5095	13.608	-0.959805	99.3286	-0.070059
1.48767	30.5869	13.6072	-0.961781	99.323	-0.0702032
1.496	30.6584	13.6064	-0.963698	99.3174	-0.0703432
1.50433	30.7272	13.6057	-0.965669	99.3118	-0.070487
1.51267	30.8043	13.6049	-0.967624	99.3062	-0.0706298
1.521	30.8764	13.6042	-0.969553	99.3008	-0.0707706
1.52933	30.9528	13.6034	-0.971494	99.2951	-0.0709122
1.53767	31.033	13.6026	-0.973451	99.2893	-0.0710551
1.546	31.1061	13.6018	-0.975472	99.2838	-0.0712026
1.55433	31.1755	13.601	-0.977457	99.278	-0.0713475
1.56267	31.2513	13.6003	-0.979421	99.2723	-0.0714908
1.571	31.3364	13.5994	-0.981419	99.2664	-0.0716367
1.57933	31.405	13.5986	-0.98344	99.2605	-0.0717842
1.58767	31.4834	13.5978	-0.985461	99.2545	-0.0719317
1.596	31.5609	13.597	-0.987531	99.2485	-0.0720828
1.60433	31.6236	13.5962	-0.989636	99.2424	-0.0722364
1.61267	31.7091	13.5953	-0.991738	99.2364	-0.0723899
1.621	31.7765	13.5945	-0.99387	99.2304	-0.0725455
1.62933	31.8591	13.5937	-0.996003	99.2243	-0.0727012
1.63767	31.9401	13.5929	-0.998114	99.2182	-0.0728553
1.646	32.0153	13.592	-1.00028	99.212	-0.0730135
1.65433	32.0925	13.5912	-1.00243	99.2059	-0.0731705
1.66267	32.1695	13.5904	-1.00461	99.2	-0.0733293
1.671	32.2503	13.5895	-1.00678	99.1939	-0.0734879
1.67933	32.3314	13.5887	-1.00897	99.1878	-0.0736478
1.68767	32.4071	13.5878	-1.01115	99.1816	-0.073807
1.696	32.4903	13.587	-1.01337	99.1755	-0.0739687
1.70433	32.5688	13.5862	-1.01553	99.1695	-0.0741263
1.71267	32.6463	13.5853	-1.01768	99.1632	-0.0742834
1.721	32.7325	13.5845	-1.01986	99.157	-0.0744427
1.72933	32.8083	13.5836	-1.02206	99.1509	-0.074603
1.73767	32.8894	13.5828	-1.02426	99.1445	-0.0747641
1.746	32.965	13.5819	-1.02651	99.138	-0.0749282
1.75433	33.0525	13.581	-1.02877	99.1315	-0.0750933
1.76267	33.1319	13.5801	-1.031	99.1253	-0.0752557
1.771	33.2126	13.5792	-1.03328	99.1189	-0.0754219
1.77933	33.2989	13.5783	-1.03555	99.1122	-0.0755876
1.78767	33.3833	13.5774	-1.03783	99.1054	-0.0757545
1.796	33.464	13.5765	-1.04017	99.0986	-0.0759247
1.80433	33.5461	13.5755	-1.04252	99.092	-0.0760966
1.81267	33.6294	13.5746	-1.04483	99.0852	-0.0762654
1.821	33.7036	13.5737	-1.04716	99.0787	-0.0764357
1.82933	33.7873	13.5728	-1.04948	99.0722	-0.0766044
1.83767	33.872	13.5719	-1.05184	99.0657	-0.0767766
1.846	33.9564	13.571	-1.05421	99.059	-0.0769496
1.85433	34.0338	13.5701	-1.05656	99.0525	-0.0771217
1.86267	34.119	13.5693	-1.05895	99.0461	-0.0772958
1.871	34.2076	13.5684	-1.06136	99.0395	-0.0774719
1.87933	34.2879	13.5674	-1.06377	99.0326	-0.0776477
1.88767	34.3726	13.5665	-1.06618	99.0256	-0.0778239
1.896	34.4544	13.5655	-1.06863	99.0188	-0.0780025
1.90433	34.544	13.5646	-1.07105	99.012	-0.0781794
1.91267	34.6229	13.5636	-1.07347	99.005	-0.0783556
1.921	34.7099	13.5627	-1.07589	98.9979	-0.0785322
1.92933	34.7937	13.5617	-1.07838	98.9907	-0.0787139
1.93767	34.8714	13.5607	-1.08085	98.9833	-0.0788943
1.946	34.957	13.5596	-1.08329	98.9758	-0.0790727
1.95433	35.0459	13.5586	-1.08572	98.9685	-0.0792499
1.96267	35.1318	13.5577	-1.08818	98.9613	-0.0794295
1.971	35.2188	13.5566	-1.09066	98.954	-0.0796106
1.97933	35.3034	13.5556	-1.09318	98.9466	-0.0797946
1.98767	35.3815	13.5546	-1.0957	98.9389	-0.0799781
1.996	35.4729	13.5535	-1.09825	98.9314	-0.0801643
2.00433	35.5573	13.5526	-1.1008	98.9241	-0.0803505
2.01267	35.6392	13.5516	-1.10327	98.9169	-0.0805312
2.021	35.727	13.5506	-1.10578	98.9096	-0.080714
2.02933	35.8114	13.5496	-1.10833	98.9023	-0.0809006
2.03767	35.8981	13.5486	-1.11094	98.8951	-0.0810908
2.046	35.9902	13.5476	-1.1135	98.8878	-0.0812774
2.05433	36.065	13.5466	-1.11606	98.8807	-0.0814644
2.06267	36.1599	13.5456	-1.11864	98.8734	-0.0816529
2.071	36.2451	13.5446	-1.12121	98.8661	-0.0818404
2.07933	36.3308	13.5436	-1.1238	98.8585	-0.0820299
2.08767	36.416	13.5425	-1.12643	98.8507	-0.0822212
2.096	36.5032	13.5414	-1.12909	98.8428	-0.0824157
2.10433	36.5895	13.5403	-1.13172	98.835	-0.0826074
2.11267	36.6723	13.5393	-1.13437	98.8271	-0.0828007
2.121	36.756	13.5382	-1.13702	98.8192	-0.0829942
2.12933	36.8492	13.5371	-1.13968	98.8115	-0.0831886
2.13767	36.9376	13.536	-1.14237	98.8034	-0.0833846
2.146	37.0271	13.5349	-1.14502	98.7954	-0.0835788
2.15433	37.1079	13.5338	-1.14773	98.7873	-0.0837765
2.16267	37.1952	13.5327	-1.15041	98.7793	-0.0839715
2.171	37.2788	13.5316	-1.15306	98.7714	-0.0841655
2.17933	37.3757	13.5305	-1.15574	98.7635	-0.0843609
2.18767	37.4563	13.5294	-1.15849	98.7553	-0.0845615
2.196	37.5497	13.5283	-1.16117	98.747	-0.0847574
2.20433	37.6326	13.5272	-1.16388	98.7387	-0.0849551
2.21267	37.7251	13.526	-1.16661	98.7302	-0.0851546
2.221	37.8042	13.5248	-1.16933	98.7218	-0.0853529
2.22933	37.8968	13.5237	-1.17205	98.7134	-0.0855515
2.23767	37.9801	13.5225	-1.17477	98.7049	-0.0857499
2.246	38.0731	13.5214	-1.17754	98.6966	-0.0859523
2.25433	38.1604	13.5202	-1.18032	98.6879	-0.0861548
2.26267	38.2466	13.519	-1.18313	98.6793	-0.08636
2.271	38.3333	13.5179	-1.18589	98.671	-0.0865619
2.27933	38.4226	13.5167	-1.18869	98.6627	-0.0867661
2.28767	38.5101	13.5156	-1.19148	98.6543	-0.0869697
2.296	38.599	13.5144	-1.19425	98.6458	-0.0871721
2.30433	38.6817	13.5133	-1.19704	98.6376	-0.0873758
2.31267	38.768	13.5121	-1.19986	98.6291	-0.0875813
2.321	38.8563	13.511	-1.20269	98.6208	-0.0877881
2.32933	38.9492	13.5098	-1.20549	98.6121	-0.0879924
2.33767	39.0322	13.5087	-1.20831	98.6037	-0.0881983
2.346	39.119	13.5075	-1.21108	98.595	-0.0884005
2.35433	39.2064	13.5062	-1.2139	98.5861	-0.0886061
2.36267	39.2976	13.505	-1.21677	98.5772	-0.0888154
2.371	39.3864	13.5038	-1.21963	98.5684	-0.0890243
2.37933	39.4677	13.5026	-1.22254	98.5596	-0.0892368
2.38767	39.5573	13.5014	-1.22547	98.5504	-0.0894509
2.396	39.6481	13.5001	-1.22838	98.5413	-0.0896631
2.40433	39.7288	13.4988	-1.23126	98.532	-0.0898735
2.41267	39.8164	13.4976	-1.23418	98.5228	-0.0900865
2.421	39.9032	13.4963	-1.2371	98.5135	-0.0902998
2.42933	39.9935	13.4951	-1.24006	98.5044	-0.0905156
2.43767	40.0757	13.4938	-1.24302	98.4952	-0.0907319
2.446	40.1661	13.4925	-1.24594	98.4861	-0.0909445
2.45433	40.2494	13.4913	-1.24886	98.4769	-0.0911581
2.46267	40.3423	13.49	-1.25179	98.4675	-0.0913722
2.471	40.4302	13.4887	-1.25471	98.4582	-0.0915849
2.47933	40.5162	13.4875	-1.25764	98.449	-0.0917992
2.48767	40.6063	13.4862	-1.26064	98.4398	-0.0920177
2.496	40.6904	13.485	-1.26361	98.4309	-0.0922349
2.50433	40.7763	13.4837	-1.26661	98.4216	-0.0924536
2.51267	40.8606	13.4824	-1.26961	98.412	-0.092673
2.521	40.9523	13.4811	-1.2726	98.4025	-0.0928909
2.52933	41.0411	13.4798	-1.27558	98.3931	-0.0931082
2.53767	41.1247	13.4785	-1.27854	98.3834	-0.0933244
2.546	41.2148	13.4772	-1.28151	98.374	-0.0935414
2.55433	41.3045	13.4759	-1.28451	98.3645	-0.0937599
2.56267	41.3844	13.4746	-1.28752	98.3548	-0.0939802
2.571	41.4742	13.4732	-1.2905	98.345	-0.0941973
2.57933	41.5535	13.4719	-1.29347	98.3351	-0.094414
2.58767	41.6439	13.4705	-1.29644	98.3252	-0.094631
2.596	41.7316	13.4692	-1.2994	98.3155	-0.0948467
2.60433	41.8149	13.4678	-1.30235	98.3058	-0.0950622
2.61267	41.9051	13.4665	-1.30535	98.2959	-0.0952817
2.621	41.9864	13.4651	-1.30839	98.286	-0.095503
2.62933	42.0768	13.4638	-1.31142	98.2761	-0.0957247
2.63767	42.1641	13.4624	-1.31445	98.266	-0.0959459
2.646	42.2555	13.461	-1.31744	98.256	-0.096164
2.65433	42.3414	13.4596	-1.32045	98.2459	-0.0963836
2.66267	42.4227	13.4582	-1.32348	98.2358	-0.0966046
2.671	42.5118	13.4569	-1.32648	98.2257	-0.0968234
2.67933	42.5955	13.4555	-1.32947	98.2156	-0.097042
2.68767	42.6849	13.4541	-1.33248	98.2055	-0.0972617
2.696	42.7678	13.4527	-1.3355	98.1952	-0.0974819
2.70433	42.8542	13.4513	-1.33847	98.1851	-0.0976988
2.71267	42.9401	13.4499	-1.34142	98.1748	-0.0979142
2.721	43.0295	13.4485	-1.34439	98.1647	-0.0981311
2.72933	43.1098	13.4472	-1.34739	98.1548	-0.0983498
2.73767	43.202	13.4458	-1.35038	98.1447	-0.0985681
2.746	43.2761	13.4444	-1.35335	98.1344	-0.098785
2.75433	43.3656	13.443	-1.35635	98.1242	-0.0990044
2.76267	43.4528	13.4415	-1.35935	98.1139	-0.0992232
2.771	43.5367	13.4401	-1.36235	98.1034	-0.0994417
2.77933	43.6254	13.4387	-1.36531	98.093	-0.0996582
2.78767	43.7085	13.4373	-1.3683	98.0825	-0.0998765
2.796	43.7943	13.4359	-1.37126	98.0723	-0.100093
2.80433	43.8788	13.4344	-1.37421	98.0617	-0.100308
2.81267	43.9623	13.4329	-1.37716	98.0511	-0.100523
2.821	44.0456	13.4315	-1.38012	98.0406	-0.100739
2.82933	44.1288	13.4301	-1.38305	98.0304	-0.100953
2.83767	44.2141	13.4287	-1.386	98.02	-0.101168
2.846	44.3007	13.4273	-1.38895	98.0096	-0.101384
2.85433	44.3856	13.4258	-1.39186	97.999	-0.101596
2.86267	44.4686	13.4244	-1.39478	97.9886	-0.101809
2.871	44.5559	13.423	-1.39773	97.9781	-0.102025
2.87933	44.6371	13.4215	-1.40065	97.9675	-0.102238
2.88767	44.7266	13.4201	-1.40358	97.9571	-0.102452
2.896	44.8101	13.4186	-1.40649	97.9465	-0.102664
2.90433	44.8923	13.4172	-1.40939	97.9358	-0.102875
2.91267	44.9838	13.4157	-1.4123	97.925	-0.103088
2.921	45.0582	13.4142	-1.41516	97.9141	-0.103297
2.92933	45.1456	13.4127	-1.41803	97.9032	-0.103506
2.93767	45.2292	13.4112	-1.4209	97.8924	-0.103716
2.946	45.3092	13.4097	-1.42373	97.8817	-0.103922
2.95433	45.4016	13.4083	-1.42651	97.8709	-0.104125
2.96267	45.4798	13.4068	-1.42934	97.8601	-0.104332
2.971	45.5566	13.4053	-1.43214	97.849	-0.104536
2.97933	45.646	13.4038	-1.43493	97.838	-0.10474
2.98767	45.7249	13.4023	-1.43772	97.8272	-0.104943
2.996	45.8108	13.4008	-1.44046	97.8166	-0.105143
3.00433	45.8971	13.3993	-1.44321	97.8058	-0.105344
3.01267	45.9768	13.3979	-1.44596	97.795	-0.105545
3.021	46.0602	13.3964	-1.44865	97.7841	-0.105741
3.02933	46.147	13.3949	-1.45139	97.7731	-0.105941
3.03767	46.2307	13.3934	-1.4541	97.7623	-0.106139
3.046	46.3142	13.3919	-1.45678	97.7515	-0.106335
3.05433	46.3918	13.3904	-1.45944	97.7406	-0.106529
3.06267	46.4747	13.389	-1.46207	97.73	-0.106721
3.071	46.5611	13.3875	-1.4647	97.7191	-0.106913
3.07933	46.6421	13.386	-1.46735	97.7082	-0.107107
3.08767	46.7214	13.3845	-1.46995	97.6975	-0.107296
3.096	46.8047	13.383	-1.47251	97.6868	-0.107483
3.10433	46.8878	13.3816	-1.47507	97.676	-0.10767
3.11267	46.9709	13.3801	-1.47759	97.6652	-0.107854
3.121	47.0522	13.3786	-1.48012	97.6544	-0.108038
3.12933	47.1317	13.3771	-1.48264	97.6436	-0.108223
3.13767	47.2183	13.3756	-1.48514	97.6328	-0.108405
3.146	47.2938	13.3742	-1.48763	97.6221	-0.108587
3.15433	47.3796	13.3727	-1.49009	97.6112	-0.108766
3.16267	47.4614	13.3712	-1.4925	97.6005	-0.108942
3.171	47.5449	13.3697	-1.4949	97.5898	-0.109117
3.17933	47.6231	13.3683	-1.49732	97.5789	-0.109294
3.18767	47.7103	13.3668	-1.49975	97.5682	-0.109471
3.196	47.7881	13.3653	-1.50214	97.5575	-0.109646
3.20433	47.8735	13.3639	-1.5045	97.5469	-0.109818
3.21267	47.9568	13.3624	-1.50677	97.5362	-0.109984
3.221	48.0327	13.3609	-1.50905	97.5253	-0.11015
3.22933	48.1152	13.3594	-1.51132	97.5144	-0.110316
3.23767	48.1999	13.358	-1.51356	97.5037	-0.110479
3.246	48.2821	13.3565	-1.51574	97.4929	-0.110639
3.25433	48.362	13.355	-1.51798	97.4823	-0.110802
3.26267	48.4511	13.3536	-1.52015	97.4715	-0.11096
3.271	48.5184	13.3521	-1.52228	97.4608	-0.111116
3.27933	48.6044	13.3506	-1.52439	97.4501	-0.11127
3.28767	48.6807	13.3492	-1.52648	97.4398	-0.111422
3.296	48.7708	13.3477	-1.52856	97.4292	-0.111574
3.30433	48.8416	13.3463	-1.53061	97.4187	-0.111724
3.31267	48.9347	13.3449	-1.53264	97.4082	-0.111872
3.321	49.0137	13.3434	-1.53465	97.3977	-0.112019
3.32933	49.092	13.342	-1.53667	97.3871	-0.112166
3.33767	49.1759	13.3405	-1.53857	97.3765	-0.112305
3.346	49.2548	13.3391	-1.5405	97.3661	-0.112446
3.35433	49.3377	13.3377	-1.54239	97.3556	-0.112584
3.36267	49.4215	13.3362	-1.54426	97.345	-0.11272
3.371	49.4995	13.3347	-1.54612	97.3342	-0.112856
3.37933	49.5802	13.3333	-1.54794	97.3237	-0.112989
3.38767	49.6575	13.3318	-1.54974	97.3131	-0.11312
3.396	49.7365	13.3304	-1.55154	97.3027	-0.113251
3.40433	49.8191	13.329	-1.55329	97.2922	-0.113379
3.41267	49.8991	13.3276	-1.55502	97.2817	-0.113506
3.421	49.9833	13.3261	-1.55678	97.2712	-0.113634
3.42933	50.0632	13.3247	-1.55844	97.2608	-0.113755
3.43767	50.1376	13.3232	-1.56013	97.2503	-0.113878
3.446	50.2219	13.3218	-1.5618	97.2398	-0.114
3.45433	50.2954	13.3204	-1.56344	97.2295	-0.11412
3.46267	50.3828	13.319	-1.56506	97.2191	-0.114238
3.471	50.4556	13.3176	-1.56667	97.2087	-0.114356
3.47933	50.536	13.3161	-1.56823	97.1985	-0.11447
3.48767	50.6189	13.3147	-1.56977	97.1882	-0.114582
3.496	50.7068	13.3133	-1.57126	97.1778	-0.114691
3.50433	50.784	13.3119	-1.5727	97.1674	-0.114796
3.51267	50.8643	13.3105	-1.5742	97.1571	-0.114905
3.521	50.9405	13.3091	-1.57559	97.147	-0.115007
3.52933	51.0276	13.3077	-1.57698	97.137	-0.115109
3.53767	51.1042	13.3063	-1.57838	97.1266	-0.115211
3.546	51.1805	13.3049	-1.57975	97.1163	-0.11531
3.55433	51.261	13.3035	-1.58105	97.1061	-0.115406
3.56267	51.3412	13.3021	-1.5823	97.096	-0.115497
3.571	51.4206	13.3007	-1.58356	97.0858	-0.115589
3.57933	51.5027	13.2993	-1.58485	97.0756	-0.115683
3.58767	51.5815	13.2979	-1.58612	97.0655	-0.115776
3.596	51.6664	13.2966	-1.5873	97.0555	-0.115862
3.60433	51.7427	13.2952	-1.5885	97.0455	-0.115949
3.61267	51.8274	13.2938	-1.58966	97.0353	-0.116034
3.621	51.9026	13.2924	-1.59078	97.0253	-0.116115
3.62933	51.9822	13.2911	-1.59186	97.0154	-0.116195
3.63767	52.0622	13.2897	-1.59294	97.0055	-0.116274
3.646	52.1409	13.2883	-1.59404	96.9955	-0.116354
3.65433	52.2194	13.287	-1.5951	96.9856	-0.116431
3.66267	52.2998	13.2856	-1.5961	96.9755	-0.116504
3.671	52.3832	13.2842	-1.59706	96.9655	-0.116574
3.67933	52.4614	13.2828	-1.59806	96.9553	-0.116647
3.68767	52.5333	13.2815	-1.59901	96.9453	-0.116717
3.696	52.617	13.2801	-1.59994	96.9357	-0.116785
3.70433	52.6985	13.2788	-1.60088	96.926	-0.116853
3.71267	52.7809	13.2775	-1.60183	96.9161	-0.116922
3.721	52.8578	13.2761	-1.60274	96.9062	-0.116989
3.72933	52.9362	13.2747	-1.60361	96.8963	-0.117052
3.73767	53.0161	13.2734	-1.60445	96.8865	-0.117113
3.746	53.0986	13.2721	-1.60527	96.8768	-0.117174
3.75433	53.1719	13.2708	-1.60608	96.8673	-0.117233
3.76267	53.2514	13.2695	-1.60685	96.8578	-0.117289
3.771	53.3325	13.2682	-1.6076	96.8482	-0.117343
3.77933	53.4124	13.2668	-1.60831	96.8382	-0.117396
3.78767	53.4905	13.2655	-1.60897	96.8285	-0.117444
3.796	53.5685	13.2641	-1.6096	96.8187	-0.117489
3.80433	53.6457	13.2628	-1.61024	96.8091	-0.117536
3.81267	53.7254	13.2615	-1.61089	96.7996	-0.117584
3.821	53.8087	13.2602	-1.61153	96.7901	-0.11763
3.82933	53.8921	13.2589	-1.61216	96.7808	-0.117677
3.83767	53.967	13.2576	-1.61279	96.7711	-0.117722
3.846	54.0474	13.2563	-1.61339	96.7614	-0.117766
3.85433	54.1283	13.255	-1.61395	96.752	-0.117807
3.86267	54.2114	13.2537	-1.61451	96.7428	-0.117848
3.871	54.2895	13.2524	-1.61506	96.7333	-0.117888
3.87933	54.3631	13.2512	-1.6156	96.7241	-0.117928
3.88767	54.4453	13.2499	-1.61615	96.7147	-0.117968
3.896	54.5261	13.2486	-1.61661	96.7052	-0.118001
3.90433	54.6092	13.2473	-1.61705	96.6957	-0.118033
3.91267	54.6855	13.246	-1.61749	96.6862	-0.118065
3.921	54.7637	13.2447	-1.6179	96.6769	-0.118095
3.92933	54.8457	13.2434	-1.61828	96.6676	-0.118123
3.93767	54.918	13.2421	-1.61869	96.6581	-0.118153
3.946	55	13.2408	-1.61907	96.6486	-0.118181
3.95433	55.0799	13.2395	-1.61945	96.6392	-0.118208
3.96267	55.1562	13.2382	-1.6198	96.6297	-0.118234
3.971	55.2332	13.2369	-1.62013	96.6204	-0.118258
3.97933	55.3152	13.2356	-1.62048	96.6109	-0.118284
3.98767	55.3994	13.2344	-1.62084	96.6016	-0.11831
3.996	55.4742	13.2331	-1.62114	96.5923	-0.118332
4.00433	55.5496	13.2318	-1.62144	96.5829	-0.118354
4.01267	55.626	13.2305	-1.62173	96.5737	-0.118375
4.021	55.7105	13.2293	-1.622	96.5645	-0.118394
4.02933	55.7866	13.228	-1.62223	96.5553	-0.118412
4.03767	55.8686	13.2268	-1.62245	96.5463	-0.118427
4.046	55.9481	13.2256	-1.6227	96.5374	-0.118446
4.05433	56.0218	13.2243	-1.62293	96.5282	-0.118462
4.06267	56.1001	13.2231	-1.6231	96.5193	-0.118475
4.071	56.1795	13.2219	-1.62327	96.5104	-0.118487
4.07933	56.2617	13.2206	-1.62344	96.5012	-0.1185
4.08767	56.3369	13.2194	-1.62361	96.4924	-0.118512
4.096	56.4155	13.2182	-1.62377	96.4835	-0.118524
4.10433	56.4999	13.217	-1.62393	96.4744	-0.118536
4.11267	56.5827	13.2157	-1.62408	96.4654	-0.118547
4.121	56.6584	13.2145	-1.62421	96.4563	-0.118556
4.12933	56.7365	13.2132	-1.62424	96.4471	-0.118558
4.13767	56.8166	13.212	-1.62428	96.438	-0.118561
4.146	56.8921	13.2107	-1.62434	96.429	-0.118565
4.15433	56.9762	13.2095	-1.62441	96.4202	-0.118571
4.16267	57.053	13.2083	-1.62447	96.4113	-0.118575
4.171	57.1297	13.2071	-1.62449	96.4024	-0.118576
4.17933	57.2138	13.2058	-1.62449	96.3933	-0.118576
4.18767	57.2948	13.2046	-1.62447	96.3841	-0.118575
4.196	57.3701	13.2034	-1.62448	96.3752	-0.118575
4.20433	57.4411	13.2021	-1.62447	96.3662	-0.118575
4.21267	57.5278	13.2009	-1.62446	96.3575	-0.118574
4.221	57.6059	13.1997	-1.62444	96.3485	-0.118573
4.22933	57.6844	13.1985	-1.62441	96.3395	-0.118571
4.23767	57.7666	13.1972	-1.62435	96.3306	-0.118566
4.246	57.8387	13.196	-1.62426	96.3217	-0.118559
4.25433	57.9258	13.1948	-1.62419	96.3128	-0.118554
4.26267	58.0032	13.1936	-1.6241	96.3041	-0.118548
4.271	58.0841	13.1924	-1.62399	96.2955	-0.11854
4.27933	58.1594	13.1912	-1.6239	96.2868	-0.118533
4.28767	58.2424	13.19	-1.62376	96.2781	-0.118523
4.296	58.3189	13.1888	-1.62365	96.2693	-0.118515
4.30433	58.3961	13.1877	-1.62351	96.2608	-0.118505
4.31267	58.4799	13.1865	-1.62332	96.2523	-0.118491
4.321	58.5532	13.1853	-1.62317	96.2438	-0.11848
4.32933	58.6384	13.1842	-1.62303	96.2352	-0.118469
4.33767	58.7148	13.183	-1.62285	96.2264	-0.118457
4.346	58.7952	13.1818	-1.62268	96.2179	-0.118444
4.35433	58.8708	13.1806	-1.62251	96.2092	-0.118432
4.36267	58.9542	13.1794	-1.62229	96.2006	-0.118416
4.371	59.0332	13.1783	-1.62214	96.1921	-0.118404
4.37933	59.112	13.1771	-1.62195	96.1834	-0.118391
4.38767	59.1953	13.1759	-1.62178	96.1748	-0.118378
4.396	59.2717	13.1747	-1.62161	96.1661	-0.118366
4.40433	59.3511	13.1735	-1.62136	96.1574	-0.118348
4.41267	59.4337	13.1723	-1.62116	96.1487	-0.118333
4.421	59.5081	13.1712	-1.62093	96.1401	-0.118317
4.42933	59.5919	13.17	-1.62072	96.1314	-0.118301
4.43767	59.6672	13.1688	-1.6205	96.123	-0.118285
4.446	59.7548	13.1677	-1.62026	96.1147	-0.118267
4.45433	59.828	13.1665	-1.62	96.1062	-0.118249
4.46267	59.9131	13.1654	-1.61975	96.0979	-0.11823
4.471	59.9851	13.1642	-1.61945	96.0895	-0.118208
4.47933	60.0658	13.163	-1.61918	96.0809	-0.118189
4.48767	60.1442	13.1619	-1.61893	96.0726	-0.118171
4.496	60.2257	13.1608	-1.61866	96.0644	-0.118151
4.50433	60.3034	13.1596	-1.6184	96.0559	-0.118132
4.51267	60.3854	13.1585	-1.6181	96.0475	-0.11811
4.521	60.4639	13.1573	-1.61779	96.0393	-0.118087
4.52933	60.5459	13.1562	-1.61754	96.0309	-0.118069
4.53767	60.6247	13.155	-1.61724	96.0225	-0.118047
4.546	60.7037	13.1539	-1.61694	96.0139	-0.118025
4.55433	60.7877	13.1527	-1.61666	96.0055	-0.118005
4.56267	60.8664	13.1516	-1.61634	95.9972	-0.117981
4.571	60.9452	13.1504	-1.61604	95.9889	-0.117959
4.57933	61.0233	13.1493	-1.61571	95.9807	-0.117935
4.58767	61.1036	13.1482	-1.61542	95.9726	-0.117914
4.596	61.1872	13.1471	-1.6151	95.9646	-0.117891
4.60433	61.2608	13.1459	-1.61477	95.9561	-0.117867
4.61267	61.3426	13.1448	-1.61441	95.9478	-0.11784
4.621	61.421	13.1437	-1.61407	95.9395	-0.117816
4.62933	61.4999	13.1426	-1.61371	95.9317	-0.11779
4.63767	61.5766	13.1415	-1.61336	95.9237	-0.117764
4.646	61.6576	13.1404	-1.61304	95.9155	-0.11774
4.65433	61.7411	13.1393	-1.61267	95.9074	-0.117714
4.66267	61.8184	13.1381	-1.6123	95.899	-0.117687
4.671	61.8999	13.137	-1.61193	95.8906	-0.117659
4.67933	61.9795	13.1358	-1.61156	95.8821	-0.117632
4.68767	62.0548	13.1347	-1.61121	95.8739	-0.117607
4.696	62.1363	13.1336	-1.61084	95.8658	-0.11758
4.70433	62.2203	13.1324	-1.61045	95.8576	-0.117552
4.71267	62.3007	13.1313	-1.61008	95.8492	-0.117524
4.721	62.3787	13.1301	-1.6097	95.8407	-0.117497
4.72933	62.4617	13.129	-1.60932	95.8324	-0.117469
4.73767	62.5354	13.1279	-1.60892	95.8242	-0.11744
4.746	62.6226	13.1267	-1.60853	95.816	-0.117411
4.75433	62.6956	13.1256	-1.60814	95.8079	-0.117383
4.76267	62.7727	13.1246	-1.60775	95.8001	-0.117355
4.771	62.8589	13.1235	-1.60736	95.7921	-0.117326
4.77933	62.9414	13.1224	-1.60698	95.7839	-0.117298
4.78767	63.0202	13.1212	-1.60661	95.7758	-0.117271
4.796	63.0994	13.1201	-1.60624	95.7676	-0.117244
4.80433	63.1789	13.119	-1.60583	95.7598	-0.117214
4.81267	63.2644	13.1179	-1.60545	95.7517	-0.117187
4.821	63.3412	13.1168	-1.60511	95.7436	-0.117162
4.82933	63.4299	13.1157	-1.60473	95.7357	-0.117134
4.83767	63.504	13.1146	-1.60433	95.7277	-0.117105
4.846	63.5845	13.1136	-1.60393	95.7197	-0.117076
4.85433	63.6656	13.1124	-1.6035	95.7116	-0.117044
4.86267	63.7481	13.1113	-1.60311	95.7036	-0.117016
4.871	63.8265	13.1103	-1.60274	95.6957	-0.116988
4.87933	63.9103	13.1092	-1.60236	95.6878	-0.116961
4.88767	63.9879	13.1081	-1.60201	95.6798	-0.116935
4.896	64.0767	13.107	-1.6016	95.672	-0.116905
4.90433	64.1517	13.1059	-1.60117	95.6639	-0.116874
4.91267	64.2367	13.1048	-1.60078	95.6557	-0.116846
4.921	64.3109	13.1037	-1.60039	95.6477	-0.116817
4.92933	64.3944	13.1026	-1.6	95.6396	-0.116789
4.93767	64.4758	13.1015	-1.59961	95.6317	-0.11676
4.946	64.5581	13.1004	-1.59922	95.6236	-0.116732
4.95433	64.643	13.0993	-1.59879	95.6156	-0.1167
4.96267	64.7224	13.0982	-1.59839	95.6074	-0.116671
4.971	64.7945	13.097	-1.59796	95.5993	-0.11664
4.97933	64.8798	13.0959	-1.59754	95.5912	-0.116609
4.98767	64.9607	13.0948	-1.59711	95.5831	-0.116578
4.996	65.0437	13.0938	-1.59667	95.5752	-0.116546
5.00433	65.1234	13.0926	-1.59626	95.5671	-0.116516
5.01267	65.1971	13.0915	-1.59586	95.5591	-0.116486
5.021	65.2827	13.0904	-1.59549	95.551	-0.11646
5.02933	65.367	13.0893	-1.59511	95.543	-0.116432
5.03767	65.4474	13.0882	-1.5947	95.5349	-0.116402
5.046	65.5284	13.0871	-1.59426	95.527	-0.11637
5.05433	65.6075	13.0861	-1.59385	95.5192	-0.11634
5.06267	65.6907	13.085	-1.59348	95.5114	-0.116313
5.071	65.7701	13.0839	-1.59311	95.5036	-0.116286
5.07933	65.8494	13.0829	-1.59276	95.4957	-0.116261
5.08767	65.9357	13.0818	-1.59239	95.4879	-0.116233
5.096	66.0154	13.0807	-1.59201	95.4797	-0.116205
5.10433	66.0987	13.0796	-1.59163	95.4716	-0.116178
5.11267	66.1789	13.0785	-1.59125	95.4636	-0.11615
5.121	66.2617	13.0774	-1.59088	95.4556	-0.116123
5.12933	66.3396	13.0763	-1.59048	95.4475	-0.116094
5.13767	66.4231	13.0752	-1.59017	95.4395	-0.116071
5.146	66.503	13.0741	-1.58984	95.4314	-0.116047
5.15433	66.5896	13.0729	-1.58952	95.4233	-0.116024
5.16267	66.6608	13.0718	-1.58923	95.4152	-0.116003
5.171	66.7483	13.0707	-1.58892	95.4071	-0.11598
5.17933	66.8262	13.0696	-1.58863	95.3993	-0.115959
5.18767	66.9046	13.0686	-1.5883	95.3913	-0.115935
5.196	66.9907	13.0675	-1.58797	95.3833	-0.11591
5.20433	67.0703	13.0664	-1.58768	95.3752	-0.115889
5.21267	67.1588	13.0653	-1.58744	95.3674	-0.115872
5.221	67.2375	13.0642	-1.58714	95.3593	-0.11585
5.22933	67.32	13.0631	-1.58681	95.3513	-0.115826
5.23767	67.401	13.062	-1.58649	95.3432	-0.115803
5.246	67.4816	13.0609	-1.58617	95.3352	-0.115779
5.25433	67.5613	13.0598	-1.58589	95.3272	-0.115759
5.26267	67.6385	13.0587	-1.58564	95.319	-0.115741
5.271	67.7208	13.0576	-1.5854	95.3109	-0.115723
5.27933	67.804	13.0565	-1.58517	95.303	-0.115706
5.28767	67.8826	13.0554	-1.58493	95.2951	-0.115689
5.296	67.9634	13.0542	-1.58468	95.2868	-0.11567
5.30433	68.0436	13.0531	-1.58446	95.2787	-0.115654
5.31267	68.1305	13.052	-1.58431	95.2706	-0.115644
5.321	68.2121	13.0509	-1.58417	95.2624	-0.115633
5.32933	68.2927	13.0498	-1.58399	95.2543	-0.11562
5.33767	68.3758	13.0487	-1.58382	95.2461	-0.115608
5.346	68.4586	13.0476	-1.58364	95.238	-0.115595
5.35433	68.5387	13.0465	-1.5835	95.2299	-0.115584
5.36267	68.6227	13.0453	-1.58335	95.2218	-0.115573
5.371	68.7024	13.0442	-1.58325	95.2136	-0.115566
5.37933	68.7833	13.0431	-1.58317	95.2055	-0.11556
5.38767	68.8662	13.042	-1.58307	95.1971	-0.115553
5.396	68.9487	13.0408	-1.58297	95.1887	-0.115546
5.40433	69.0316	13.0397	-1.58288	95.1806	-0.115539
5.41267	69.1092	13.0386	-1.58284	95.1723	-0.115536
5.421	69.1955	13.0374	-1.58275	95.1639	-0.115529
5.42933	69.2747	13.0363	-1.5827	95.1555	-0.115526
5.43767	69.3557	13.0351	-1.58266	95.1471	-0.115523
5.446	69.4405	13.034	-1.58265	95.1387	-0.115523
5.45433	69.5241	13.0328	-1.58266	95.1303	-0.115523
5.46267	69.6093	13.0317	-1.5827	95.122	-0.115526
5.471	69.6853	13.0305	-1.58272	95.1137	-0.115528
5.47933	69.7668	13.0294	-1.58276	95.1055	-0.115531
5.48767	69.8496	13.0282	-1.58284	95.0971	-0.115536
5.496	69.9267	13.0271	-1.58292	95.0885	-0.115542
5.50433	70.0106	13.026	-1.58305	95.0803	-0.115551
5.51267	70.0928	13.0248	-1.58314	95.072	-0.115558
5.521	70.174	13.0237	-1.58324	95.0636	-0.115565
5.52933	70.2599	13.0225	-1.58335	95.0552	-0.115573
5.53767	70.3405	13.0214	-1.58349	95.047	-0.115583
5.546	70.4281	13.0203	-1.5836	95.0387	-0.115592
5.55433	70.5109	13.0191	-1.58375	95.0302	-0.115603
5.56267	70.5885	13.0179	-1.58391	95.0216	-0.115614
5.571	70.6653	13.0167	-1.58404	95.013	-0.115624
5.57933	70.7583	13.0156	-1.58418	95.0047	-0.115634
5.58767	70.841	13.0144	-1.58436	94.9961	-0.115647
5.596	70.919	13.0132	-1.58458	94.9874	-0.115663
5.60433	71.0024	13.012	-1.5848	94.9787	-0.115679
5.61267	71.0861	13.0109	-1.58502	94.9701	-0.115696
5.621	71.163	13.0096	-1.58522	94.9612	-0.11571
5.62933	71.2481	13.0084	-1.58544	94.9525	-0.115726
5.63767	71.3307	13.0073	-1.58567	94.9439	-0.115742
5.646	71.4132	13.0061	-1.58591	94.9354	-0.11576
5.65433	71.4913	13.0049	-1.58621	94.9266	-0.115782
5.66267	71.5753	13.0037	-1.58648	94.9179	-0.115802
5.671	71.6602	13.0025	-1.58676	94.9093	-0.115823
5.67933	71.7447	13.0014	-1.58705	94.9007	-0.115844
5.68767	71.8233	13.0002	-1.58735	94.8921	-0.115865
5.696	71.8999	12.999	-1.58765	94.8834	-0.115887
5.70433	71.9815	12.9978	-1.58798	94.8749	-0.115911
5.71267	72.0708	12.9966	-1.5883	94.8661	-0.115935
5.721	72.1549	12.9954	-1.58865	94.8573	-0.11596
5.72933	72.2404	12.9942	-1.589	94.8484	-0.115986
5.73767	72.3177	12.993	-1.58933	94.8398	-0.11601
5.746	72.4005	12.9918	-1.58967	94.8309	-0.116035
5.75433	72.4788	12.9906	-1.59002	94.8221	-0.11606
5.76267	72.5666	12.9894	-1.59039	94.8133	-0.116087
5.771	72.6512	12.9882	-1.59075	94.8044	-0.116114
5.77933	72.7325	12.987	-1.59111	94.7957	-0.11614
5.78767	72.8122	12.9857	-1.59144	94.7867	-0.116164
5.796	72.8963	12.9845	-1.59183	94.7779	-0.116192
5.80433	72.9724	12.9833	-1.59221	94.7693	-0.11622
5.81267	73.0538	12.9821	-1.59259	94.7605	-0.116248
5.821	73.1424	12.9809	-1.59298	94.7517	-0.116276
5.82933	73.2258	12.9797	-1.59338	94.7427	-0.116305
5.83767	73.2967	12.9785	-1.5938	94.7337	-0.116336
5.846	73.3844	12.9772	-1.59419	94.7246	-0.116365
5.85433	73.4686	12.976	-1.5946	94.7157	-0.116395
5.86267	73.5515	12.9748	-1.59505	94.7066	-0.116428
5.871	73.6323	12.9735	-1.59555	94.6977	-0.116464
5.87933	73.7132	12.9723	-1.59598	94.6888	-0.116496
5.88767	73.8022	12.9711	-1.59641	94.6796	-0.116527
5.896	73.8813	12.9698	-1.59684	94.6706	-0.116558
5.90433	73.9657	12.9686	-1.59725	94.6619	-0.116588
5.91267	74.0481	12.9674	-1.59771	94.6531	-0.116622
5.921	74.1304	12.9662	-1.59814	94.6443	-0.116653
5.92933	74.2145	12.965	-1.59858	94.6355	-0.116685
5.93767	74.2936	12.9638	-1.59904	94.6265	-0.116719
5.946	74.375	12.9626	-1.59948	94.6175	-0.116751
5.95433	74.4599	12.9613	-1.59989	94.6086	-0.116781
5.96267	74.5411	12.9601	-1.60033	94.5999	-0.116813
5.971	74.6295	12.9589	-1.60078	94.5912	-0.116846
5.97933	74.7077	12.9577	-1.60127	94.5822	-0.116881
5.98767	74.7917	12.9565	-1.60176	94.5731	-0.116917
5.996	74.8711	12.9552	-1.60224	94.5641	-0.116952
6.00433	74.9523	12.954	-1.60275	94.5552	-0.116989
6.01267	75.0387	12.9528	-1.60323	94.5461	-0.117024
6.021	75.1174	12.9515	-1.60371	94.5371	-0.11706
6.02933	75.2049	12.9503	-1.60421	94.5281	-0.117096
6.03767	75.2828	12.9491	-1.60469	94.519	-0.117131
6.046	75.3671	12.9478	-1.60515	94.5098	-0.117165
6.05433	75.4529	12.9465	-1.60562	94.5006	-0.117199
6.06267	75.5344	12.9453	-1.60607	94.4914	-0.117232
6.071	75.6127	12.944	-1.60657	94.4822	-0.117268
6.07933	75.6939	12.9428	-1.60704	94.473	-0.117303
6.08767	75.7816	12.9415	-1.60749	94.4638	-0.117336
6.096	75.8618	12.9403	-1.60797	94.4549	-0.117371
6.10433	75.9457	12.939	-1.60846	94.4458	-0.117406
6.11267	76.0331	12.9378	-1.60895	94.4366	-0.117442
6.121	76.107	12.9365	-1.60944	94.4274	-0.117478
6.12933	76.1936	12.9352	-1.60999	94.4182	-0.117518
6.13767	76.2766	12.934	-1.61051	94.4088	-0.117556
6.146	76.3534	12.9327	-1.61102	94.3995	-0.117593
6.15433	76.4399	12.9314	-1.61153	94.3903	-0.11763
6.16267	76.5223	12.9302	-1.61205	94.3813	-0.117668
6.171	76.5993	12.9289	-1.61255	94.3721	-0.117705
6.17933	76.6788	12.9277	-1.61308	94.3629	-0.117744
6.18767	76.7679	12.9264	-1.61357	94.3535	-0.11778
6.196	76.8493	12.9251	-1.61404	94.3441	-0.117814
6.20433	76.9312	12.9238	-1.61455	94.3349	-0.117851
6.21267	77.0198	12.9226	-1.61505	94.3257	-0.117887
6.221	77.0972	12.9213	-1.61555	94.3165	-0.117924
6.22933	77.1841	12.92	-1.61608	94.3072	-0.117963
6.23767	77.2657	12.9188	-1.61658	94.2979	-0.117999
6.246	77.3444	12.9175	-1.61707	94.2887	-0.118035
6.25433	77.4327	12.9162	-1.61757	94.2794	-0.118071
6.26267	77.5079	12.9149	-1.61809	94.2701	-0.118109
6.271	77.5949	12.9137	-1.6186	94.261	-0.118146
6.27933	77.6724	12.9125	-1.61913	94.2519	-0.118185
6.28767	77.7557	12.9112	-1.61966	94.2426	-0.118223
6.296	77.845	12.9099	-1.62018	94.2334	-0.118261
6.30433	77.9233	12.9087	-1.62069	94.2241	-0.118299
6.31267	78.0086	12.9074	-1.62122	94.2149	-0.118337
6.321	78.0923	12.9061	-1.62176	94.2055	-0.118377
6.32933	78.1717	12.9048	-1.62226	94.1962	-0.118414
6.33767	78.252	12.9036	-1.62281	94.1869	-0.118453
6.346	78.3361	12.9023	-1.62332	94.1774	-0.118491
6.35433	78.4131	12.901	-1.62386	94.1682	-0.11853
6.36267	78.4956	12.8997	-1.62439	94.1588	-0.118569
6.371	78.5763	12.8984	-1.62491	94.1495	-0.118607
6.37933	78.6665	12.8972	-1.62546	94.1403	-0.118647
6.38767	78.7486	12.8959	-1.62601	94.1311	-0.118687
6.396	78.8311	12.8947	-1.62653	94.1219	-0.118725
6.40433	78.9109	12.8934	-1.62707	94.1128	-0.118765
6.41267	78.9988	12.8921	-1.62764	94.1036	-0.118806
6.421	79.08	12.8909	-1.62821	94.0944	-0.118848
6.42933	79.1609	12.8896	-1.62874	94.0852	-0.118886
6.43767	79.2455	12.8883	-1.62929	94.0757	-0.118926
6.446	79.3286	12.887	-1.62981	94.0662	-0.118965
6.45433	79.4114	12.8857	-1.63035	94.0568	-0.119004
6.46267	79.4923	12.8844	-1.63084	94.0474	-0.11904
6.471	79.5789	12.8831	-1.63138	94.0377	-0.119079
6.47933	79.6623	12.8818	-1.63193	94.0281	-0.119119
6.48767	79.7415	12.8804	-1.63248	94.0182	-0.119159
6.496	79.8241	12.8791	-1.63304	94.0087	-0.1192
6.50433	79.9055	12.8779	-1.63355	93.9992	-0.119238
6.51267	79.9927	12.8765	-1.6341	93.9895	-0.119278
6.521	80.072	12.8752	-1.63464	93.9801	-0.119317
6.52933	80.1586	12.8739	-1.63521	93.9706	-0.119359
6.53767	80.2437	12.8726	-1.63581	93.9611	-0.119403
6.546	80.3242	12.8713	-1.6364	93.9516	-0.119446
6.55433	80.4052	12.87	-1.63696	93.9419	-0.119487
6.56267	80.4928	12.8687	-1.63753	93.9324	-0.119529
6.571	80.5685	12.8674	-1.6381	93.923	-0.11957
6.57933	80.6524	12.8661	-1.63865	93.9137	-0.11961
6.58767	80.7404	12.8648	-1.63925	93.9041	-0.119654
6.596	80.8151	12.8635	-1.63982	93.8948	-0.119695
6.60433	80.9036	12.8622	-1.6404	93.8852	-0.119738
6.61267	80.9849	12.8609	-1.64099	93.8757	-0.119781
6.621	81.0659	12.8596	-1.64158	93.8661	-0.119824
6.62933	81.1533	12.8583	-1.64216	93.8564	-0.119866
6.63767	81.2377	12.857	-1.64275	93.8469	-0.119909
6.646	81.3162	12.8557	-1.64332	93.8375	-0.119951
6.65433	81.3935	12.8544	-1.64389	93.8281	-0.119992
6.66267	81.484	12.8531	-1.64447	93.8184	-0.120035
6.671	81.5632	12.8518	-1.64506	93.8089	-0.120078
6.67933	81.6467	12.8504	-1.6457	93.799	-0.120125
6.68767	81.7181	12.8491	-1.6463	93.7895	-0.120168
6.696	81.8053	12.8478	-1.64688	93.78	-0.120211
6.70433	81.8908	12.8465	-1.64744	93.7706	-0.120251
6.71267	81.9763	12.8452	-1.64802	93.7609	-0.120294
6.721	82.056	12.8439	-1.64857	93.7512	-0.120334
6.72933	82.1398	12.8425	-1.64911	93.7416	-0.120374
6.73767	82.2273	12.8412	-1.64967	93.7319	-0.120414
6.746	82.3108	12.8399	-1.65023	93.7222	-0.120455
6.75433	82.3881	12.8386	-1.65076	93.7126	-0.120494
6.76267	82.4688	12.8373	-1.65125	93.703	-0.12053
6.771	82.5566	12.8359	-1.6518	93.6933	-0.12057
6.77933	82.638	12.8346	-1.65233	93.6837	-0.120608
6.78767	82.7191	12.8333	-1.65289	93.674	-0.120649
6.796	82.8043	12.832	-1.65344	93.6645	-0.12069
6.80433	82.8865	12.8307	-1.65402	93.6549	-0.120732
6.81267	82.9672	12.8294	-1.6546	93.6453	-0.120774
6.821	83.0498	12.828	-1.65514	93.6356	-0.120813
6.82933	83.1353	12.8267	-1.65569	93.6257	-0.120854
6.83767	83.2172	12.8253	-1.65626	93.6158	-0.120895
6.846	83.3019	12.824	-1.65678	93.6062	-0.120933
6.85433	83.3817	12.8227	-1.65728	93.5966	-0.12097
6.86267	83.4573	12.8214	-1.6578	93.5869	-0.121008
6.871	83.5461	12.8201	-1.65827	93.5773	-0.121042
6.87933	83.6344	12.8187	-1.65873	93.5676	-0.121076
6.88767	83.7096	12.8174	-1.65921	93.5581	-0.12111
6.896	83.7952	12.8161	-1.65968	93.5484	-0.121145
6.90433	83.8832	12.8148	-1.66018	93.5389	-0.121182
6.91267	83.9682	12.8135	-1.66065	93.5292	-0.121216
6.921	84.0519	12.8121	-1.66111	93.5195	-0.121249
6.92933	84.1346	12.8108	-1.66157	93.5098	-0.121283
6.93767	84.2155	12.8095	-1.66204	93.5001	-0.121317
6.946	84.2991	12.8082	-1.66251	93.4906	-0.121352
6.95433	84.3818	12.8068	-1.66294	93.4809	-0.121383
6.96267	84.4651	12.8055	-1.6634	93.4713	-0.121416
6.971	84.5435	12.8042	-1.66381	93.4616	-0.121446
6.97933	84.6252	12.8029	-1.6642	93.4522	-0.121475
6.98767	84.7101	12.8016	-1.66458	93.4426	-0.121502
6.996	84.7919	12.8003	-1.66496	93.4332	-0.12153
7.00433	84.8744	12.799	-1.66533	93.4238	-0.121558
7.01267	84.9615	12.7977	-1.66577	93.4142	-0.12159
7.021	85.0462	12.7964	-1.66612	93.4047	-0.121615
7.02933	85.1266	12.7951	-1.66643	93.3952	-0.121638
7.03767	85.2122	12.7938	-1.66676	93.3856	-0.121661
7.046	85.2912	12.7925	-1.66707	93.3762	-0.121684
7.05433	85.3763	12.7912	-1.66739	93.3667	-0.121708
7.06267	85.4563	12.7899	-1.66772	93.357	-0.121732
7.071	85.5403	12.7886	-1.66803	93.3475	-0.121754
7.07933	85.6201	12.7873	-1.66832	93.338	-0.121775
7.08767	85.7008	12.786	-1.66859	93.3287	-0.121795
7.096	85.7887	12.7847	-1.66878	93.3195	-0.12181
7.10433	85.8732	12.7834	-1.66905	93.31	-0.121829
7.11267	85.9579	12.7822	-1.66928	93.3008	-0.121846
7.121	86.0444	12.7809	-1.66952	93.2914	-0.121863
7.12933	86.1179	12.7796	-1.66975	93.2819	-0.12188
7.13767	86.2061	12.7783	-1.66998	93.2725	-0.121897
7.146	86.2845	12.777	-1.67016	93.2631	-0.12191
7.15433	86.3717	12.7757	-1.67026	93.2537	-0.121917
7.16267	86.4531	12.7744	-1.67039	93.2444	-0.121927
7.171	86.534	12.7731	-1.67052	93.2349	-0.121936
7.17933	86.6155	12.7719	-1.67064	93.2255	-0.121945
7.18767	86.7	12.7706	-1.67073	93.2163	-0.121952
7.196	86.7818	12.7693	-1.67081	93.2068	-0.121957
7.20433	86.8673	12.768	-1.67088	93.1975	-0.121963
7.21267	86.9556	12.7668	-1.67091	93.1884	-0.121965
7.221	87.037	12.7655	-1.67093	93.1792	-0.121966
7.22933	87.1189	12.7642	-1.67097	93.17	-0.121969
7.23767	87.2055	12.763	-1.67101	93.1606	-0.121972
7.246	87.2892	12.7617	-1.67101	93.1514	-0.121972
7.25433	87.3722	12.7605	-1.67093	93.1423	-0.121966
7.26267	87.455	12.7592	-1.67088	93.133	-0.121963
7.271	87.5414	12.7579	-1.67085	93.1239	-0.121961
7.27933	87.6217	12.7566	-1.67084	93.1145	-0.12196
7.28767	87.7035	12.7554	-1.67078	93.1054	-0.121955
7.296	87.7858	12.7541	-1.67072	93.0963	-0.121951
7.30433	87.8699	12.7529	-1.67064	93.0871	-0.121945
7.31267	87.9549	12.7516	-1.6705	93.0781	-0.121935
7.321	88.0405	12.7504	-1.67037	93.069	-0.121925
7.32933	88.1224	12.7492	-1.67024	93.06	-0.121915
7.33767	88.2059	12.7479	-1.67013	93.051	-0.121908
7.346	88.2873	12.7467	-1.67	93.042	-0.121898
7.35433	88.3768	12.7455	-1.6698	93.0331	-0.121883
7.36267	88.4588	12.7443	-1.66959	93.0244	-0.121868
7.371	88.5405	12.7431	-1.66939	93.0154	-0.121854
7.37933	88.6227	12.7418	-1.66918	93.0063	-0.121838
7.38767	88.7083	12.7406	-1.66892	92.9974	-0.12182
7.396	88.7878	12.7393	-1.6687	92.9882	-0.121804
7.40433	88.8757	12.7381	-1.66844	92.9792	-0.121785
7.41267	88.9588	12.7369	-1.66814	92.9703	-0.121763
7.421	89.0413	12.7356	-1.66786	92.9612	-0.121742
7.42933	89.1238	12.7344	-1.66755	92.9522	-0.12172
7.43767	89.2073	12.7332	-1.66727	92.9431	-0.121699
7.446	89.2893	12.7319	-1.66695	92.934	-0.121676
7.45433	89.3735	12.7307	-1.66661	92.9249	-0.121651
7.46267	89.4578	12.7295	-1.66628	92.9161	-0.121627
7.471	89.5425	12.7282	-1.66595	92.9072	-0.121603
7.47933	89.6214	12.7271	-1.66563	92.8985	-0.12158
7.48767	89.7036	12.7258	-1.66533	92.8896	-0.121557
7.496	89.7917	12.7246	-1.66499	92.8807	-0.121533
7.50433	89.8701	12.7234	-1.66463	92.872	-0.121506
7.51267	89.959	12.7222	-1.66426	92.8634	-0.121479
7.521	90.039	12.721	-1.6639	92.8547	-0.121453
7.52933	90.1241	12.7199	-1.66354	92.8462	-0.121427
7.53767	90.2088	12.7187	-1.66312	92.8373	-0.121396
7.546	90.2959	12.7175	-1.66265	92.8286	-0.121362
7.55433	90.3742	12.7163	-1.66221	92.8198	-0.12133
7.56267	90.4611	12.7151	-1.66173	92.8111	-0.121295
7.571	90.5375	12.7139	-1.66125	92.8025	-0.12126
7.57933	90.6245	12.7127	-1.66082	92.7941	-0.121228
7.58767	90.7043	12.7115	-1.66032	92.7853	-0.121192
7.596	90.7899	12.7103	-1.65981	92.7765	-0.121155
7.60433	90.8732	12.7092	-1.6593	92.7681	-0.121117
7.61267	90.9599	12.708	-1.65875	92.7596	-0.121077
7.621	91.0402	12.7069	-1.65824	92.7513	-0.12104
7.62933	91.1246	12.7057	-1.65776	92.7428	-0.121005
7.63767	91.2137	12.7045	-1.65721	92.7342	-0.120965
7.646	91.2896	12.7034	-1.65664	92.7257	-0.120923
7.65433	91.3787	12.7022	-1.65605	92.7172	-0.12088
7.66267	91.4574	12.7011	-1.65545	92.7087	-0.120836
7.671	91.545	12.6999	-1.65485	92.7003	-0.120792
7.67933	91.6225	12.6988	-1.65423	92.6919	-0.120747
7.68767	91.7081	12.6976	-1.65359	92.6835	-0.120701
7.696	91.7947	12.6964	-1.65295	92.6751	-0.120654
7.70433	91.8764	12.6953	-1.6523	92.6665	-0.120606
7.71267	91.9623	12.6941	-1.65165	92.6581	-0.120559
7.721	92.0409	12.693	-1.65102	92.6498	-0.120513
7.72933	92.1288	12.6919	-1.65038	92.6416	-0.120466
7.73767	92.2103	12.6907	-1.64969	92.6332	-0.120416
7.746	92.2978	12.6896	-1.64898	92.6249	-0.120364
7.75433	92.3782	12.6884	-1.6483	92.6165	-0.120314
7.76267	92.4629	12.6873	-1.6476	92.6081	-0.120263
7.771	92.5455	12.6861	-1.64687	92.5999	-0.12021
7.77933	92.6289	12.685	-1.64614	92.5916	-0.120156
7.78767	92.7158	12.6839	-1.64541	92.5834	-0.120103
7.796	92.7978	12.6828	-1.64463	92.5752	-0.120047
7.80433	92.8832	12.6816	-1.64388	92.5669	-0.119992
7.81267	92.9691	12.6805	-1.64314	92.5588	-0.119937
7.821	93.053	12.6794	-1.64241	92.5508	-0.119885
7.82933	93.1341	12.6783	-1.64166	92.5429	-0.119829
7.83767	93.2169	12.6772	-1.64088	92.5349	-0.119773
7.846	93.3068	12.6761	-1.64011	92.5268	-0.119717
7.85433	93.3852	12.675	-1.63934	92.5184	-0.11966
7.86267	93.4685	12.6739	-1.63857	92.5104	-0.119604
7.871	93.5525	12.6728	-1.63779	92.5025	-0.119547
7.87933	93.6321	12.6717	-1.63698	92.4946	-0.119488
7.88767	93.7182	12.6706	-1.63612	92.4866	-0.119426
7.896	93.8018	12.6695	-1.63528	92.4787	-0.119364
7.90433	93.8864	12.6684	-1.63443	92.4706	-0.119302
7.91267	93.9636	12.6673	-1.63357	92.4625	-0.119239
7.921	94.0539	12.6662	-1.6327	92.4545	-0.119176
7.92933	94.1389	12.6651	-1.63181	92.4466	-0.119111
7.93767	94.2206	12.6641	-1.63089	92.439	-0.119044
7.946	94.3084	12.663	-1.62997	92.4311	-0.118977
7.95433	94.3866	12.6619	-1.62902	92.423	-0.118907
7.96267	94.4684	12.6608	-1.62807	92.4149	-0.118838
7.971	94.5569	12.6597	-1.62712	92.4072	-0.118768
7.97933	94.6415	12.6587	-1.62612	92.3995	-0.118696
7.98767	94.7239	12.6576	-1.62513	92.3917	-0.118623
7.996	94.8105	12.6565	-1.62412	92.3838	-0.118549
8.00433	94.8943	12.6555	-1.62313	92.3762	-0.118477
8.01267	94.9754	12.6544	-1.62212	92.3684	-0.118404
8.021	95.0602	12.6534	-1.62111	92.3607	-0.11833
8.02933	95.1448	12.6523	-1.62007	92.353	-0.118254
8.03767	95.2236	12.6513	-1.61906	92.3454	-0.11818
8.046	95.3094	12.6503	-1.61802	92.3381	-0.118104
8.05433	95.3946	12.6492	-1.61695	92.3303	-0.118026
8.06267	95.4824	12.6482	-1.6159	92.3227	-0.117949
8.071	95.5639	12.6471	-1.61483	92.3152	-0.117871
8.07933	95.6516	12.6461	-1.61376	92.3078	-0.117793
8.08767	95.732	12.6451	-1.61263	92.3003	-0.11771
8.096	95.8159	12.6441	-1.6115	92.2929	-0.117628
8.10433	95.8978	12.6431	-1.61039	92.2854	-0.117547
8.11267	95.9829	12.6421	-1.60926	92.2781	-0.117464
8.121	96.0649	12.641	-1.60808	92.2707	-0.117379
8.12933	96.1497	12.64	-1.60693	92.2633	-0.117295
8.13767	96.2332	12.639	-1.60577	92.2559	-0.11721
8.146	96.3124	12.638	-1.6046	92.2484	-0.117124
8.15433	96.3991	12.637	-1.60341	92.2409	-0.117038
8.16267	96.4825	12.6359	-1.60221	92.2335	-0.11695
8.171	96.567	12.6349	-1.60104	92.2262	-0.116865
8.17933	96.6529	12.6339	-1.59983	92.2189	-0.116776
8.18767	96.7378	12.6329	-1.59859	92.2115	-0.116686
8.196	96.8275	12.6319	-1.59736	92.2041	-0.116596
8.20433	96.9039	12.6309	-1.59614	92.1969	-0.116507
8.21267	96.9946	12.6299	-1.59489	92.1895	-0.116416
8.221	97.0722	12.6289	-1.59366	92.1824	-0.116326
8.22933	97.1594	12.628	-1.59239	92.1752	-0.116234
8.23767	97.2436	12.627	-1.59111	92.1681	-0.11614
8.246	97.3265	12.626	-1.58982	92.1608	-0.116046
8.25433	97.4138	12.625	-1.58853	92.1538	-0.115951
8.26267	97.4929	12.6241	-1.58722	92.1467	-0.115856
8.271	97.5821	12.6231	-1.58592	92.1395	-0.115761
8.27933	97.6645	12.6221	-1.58462	92.1325	-0.115666
8.28767	97.7476	12.6211	-1.58331	92.1254	-0.11557
8.296	97.8342	12.6202	-1.58197	92.1184	-0.115472
8.30433	97.9155	12.6192	-1.58061	92.1113	-0.115373
8.31267	98.0037	12.6182	-1.57925	92.1043	-0.115274
8.321	98.0858	12.6173	-1.57792	92.0975	-0.115177
8.32933	98.1727	12.6164	-1.57657	92.0906	-0.115078
8.33767	98.258	12.6154	-1.57519	92.0835	-0.114978
8.346	98.3345	12.6144	-1.57389	92.0765	-0.114883
8.35433	98.4213	12.6135	-1.57254	92.0698	-0.114784
8.36267	98.5063	12.6126	-1.57115	92.0631	-0.114683
8.371	98.5901	12.6117	-1.56975	92.0562	-0.114581
8.37933	98.6718	12.6107	-1.56836	92.0496	-0.114479
8.38767	98.7546	12.6098	-1.56696	92.043	-0.114377
8.396	98.8448	12.6089	-1.56556	92.0362	-0.114275
8.40433	98.93	12.608	-1.56415	92.0293	-0.114172
8.41267	99.0143	12.6071	-1.56278	92.0227	-0.114072
8.421	99.0943	12.6062	-1.56142	92.0161	-0.113972
8.42933	99.177	12.6052	-1.56	92.0095	-0.113869
8.43767	99.2647	12.6043	-1.5586	92.0027	-0.113767
8.446	99.3517	12.6034	-1.55719	91.9959	-0.113664
8.45433	99.43	12.6025	-1.55582	91.9891	-0.113564
8.46267	99.518	12.6015	-1.55445	91.9825	-0.113464
8.471	99.5985	12.6006	-1.55305	91.9757	-0.113362
8.47933	99.6858	12.5997	-1.55171	91.9692	-0.113264
8.48767	99.7734	12.5988	-1.55035	91.9627	-0.113164
8.496	99.8591	12.5979	-1.54898	91.956	-0.113064
8.50433	99.9431	12.597	-1.54759	91.9492	-0.112963
8.51267	100.023	12.5961	-1.54619	91.9425	-0.112861
8.521	100.11	12.5952	-1.54482	91.9359	-0.112761
8.52933	100.198	12.5943	-1.54348	91.9293	-0.112663
8.53767	100.278	12.5934	-1.54208	91.9228	-0.112561
8.546	100.361	12.5925	-1.54072	91.9163	-0.112462
8.55433	100.445	12.5916	-1.53939	91.9097	-0.112365
8.56267	100.536	12.5907	-1.53799	91.9033	-0.112262
8.571	100.621	12.5898	-1.53659	91.8967	-0.11216
8.57933	100.707	12.5889	-1.53517	91.8901	-0.112057
8.58767	100.788	12.588	-1.53375	91.8837	-0.111953
8.596	100.87	12.5871	-1.53238	91.8773	-0.111853
8.60433	100.958	12.5863	-1.53096	91.8708	-0.111749
8.61267	101.042	12.5854	-1.52955	91.8643	-0.111647
8.621	101.124	12.5845	-1.52816	91.8576	-0.111545
8.62933	101.21	12.5836	-1.52674	91.8511	-0.111441
8.63767	101.292	12.5827	-1.52532	91.8449	-0.111338
8.646	101.38	12.5818	-1.5239	91.8383	-0.111234
8.65433	101.467	12.5809	-1.5225	91.8316	-0.111132
8.66267	101.552	12.58	-1.52113	91.8251	-0.111032
8.671	101.632	12.5791	-1.51973	91.8186	-0.11093
8.67933	101.72	12.5782	-1.51832	91.8122	-0.110827
8.68767	101.798	12.5773	-1.51694	91.8057	-0.110726
8.696	101.884	12.5765	-1.51552	91.7993	-0.110622
8.70433	101.967	12.5756	-1.51414	91.7931	-0.110521
8.71267	102.056	12.5747	-1.51275	91.7868	-0.11042
8.721	102.14	12.5739	-1.51137	91.7803	-0.11032
8.72933	102.226	12.573	-1.51001	91.7741	-0.11022
8.73767	102.304	12.5722	-1.50866	91.7681	-0.110121
8.746	102.392	12.5713	-1.5073	91.7619	-0.110022
8.75433	102.477	12.5705	-1.50596	91.7557	-0.109924
8.76267	102.566	12.5696	-1.50459	91.7493	-0.109825
8.771	102.65	12.5687	-1.50321	91.743	-0.109724
8.77933	102.738	12.5679	-1.50186	91.7368	-0.109625
8.78767	102.815	12.567	-1.50049	91.7304	-0.109526
8.796	102.903	12.5662	-1.49916	91.7241	-0.109428
8.80433	102.987	12.5653	-1.49781	91.7179	-0.109329
8.81267	103.073	12.5645	-1.49646	91.7117	-0.109231
8.821	103.15	12.5636	-1.4951	91.7052	-0.109132
8.82933	103.243	12.5627	-1.49371	91.6991	-0.109031
8.83767	103.326	12.5619	-1.49234	91.693	-0.10893
8.846	103.414	12.5611	-1.49097	91.6869	-0.10883
8.85433	103.491	12.5602	-1.48964	91.681	-0.108733
8.86267	103.581	12.5594	-1.4883	91.6749	-0.108636
8.871	103.659	12.5586	-1.48697	91.6688	-0.108539
8.87933	103.754	12.5578	-1.48561	91.6627	-0.108439
8.88767	103.831	12.5569	-1.48425	91.6566	-0.10834
8.896	103.918	12.5561	-1.48288	91.6504	-0.10824
8.90433	104.004	12.5553	-1.48152	91.6446	-0.10814
8.91267	104.087	12.5544	-1.48019	91.6385	-0.108043
8.921	104.169	12.5536	-1.47884	91.6324	-0.107945
8.92933	104.26	12.5528	-1.4775	91.6265	-0.107847
8.93767	104.339	12.5519	-1.47616	91.6203	-0.107749
8.946	104.423	12.5511	-1.47478	91.6143	-0.107649
8.95433	104.515	12.5503	-1.47341	91.6084	-0.107548
8.96267	104.597	12.5495	-1.47207	91.6027	-0.10745
8.971	104.68	12.5487	-1.47072	91.5969	-0.107352
8.97933	104.764	12.5479	-1.46934	91.5909	-0.107251
8.98767	104.85	12.5471	-1.46799	91.585	-0.107153
8.996	104.93	12.5463	-1.46664	91.5789	-0.107055
9.00433	105.018	12.5455	-1.46533	91.573	-0.106959
9.01267	105.107	12.5446	-1.46403	91.567	-0.106864
9.021	105.19	12.5438	-1.46268	91.5611	-0.106766
9.02933	105.272	12.543	-1.46139	91.5551	-0.106672
9.03767	105.357	12.5422	-1.46011	91.5489	-0.106578
9.046	105.442	12.5413	-1.45879	91.5427	-0.106481
9.05433	105.521	12.5405	-1.45745	91.5366	-0.106384
9.06267	105.613	12.5396	-1.45617	91.5305	-0.10629
9.071	105.695	12.5388	-1.45487	91.5246	-0.106196
9.07933	105.773	12.538	-1.45358	91.5187	-0.106101
9.08767	105.86	12.5372	-1.45229	91.5127	-0.106007
9.096	105.95	12.5364	-1.45097	91.5068	-0.10591
9.10433	106.029	12.5356	-1.44969	91.5008	-0.105817
9.11267	106.119	12.5348	-1.44836	91.495	-0.10572
9.121	106.206	12.534	-1.44705	91.4891	-0.105624
9.12933	106.29	12.5332	-1.44575	91.4833	-0.105529
9.13767	106.369	12.5323	-1.44447	91.4773	-0.105436
9.146	106.452	12.5316	-1.44319	91.4716	-0.105342
9.15433	106.54	12.5308	-1.44192	91.4657	-0.10525
9.16267	106.626	12.53	-1.44065	91.46	-0.105157
9.171	106.709	12.5292	-1.43937	91.4541	-0.105064
9.17933	106.791	12.5284	-1.43813	91.4484	-0.104974
9.18767	106.879	12.5276	-1.43685	91.4427	-0.10488
9.196	106.97	12.5268	-1.4356	91.4369	-0.104788
9.20433	107.048	12.5261	-1.43433	91.4314	-0.104696
9.21267	107.13	12.5253	-1.43306	91.4258	-0.104604
9.221	107.213	12.5245	-1.43184	91.4203	-0.104515
9.22933	107.3	12.5238	-1.43062	91.4148	-0.104425
9.23767	107.385	12.523	-1.42936	91.4091	-0.104334
9.246	107.466	12.5222	-1.42813	91.4033	-0.104244
9.25433	107.555	12.5214	-1.42691	91.3978	-0.104154
9.26267	107.639	12.5207	-1.42564	91.3922	-0.104061
9.271	107.728	12.5199	-1.42437	91.3866	-0.103969
9.27933	107.812	12.5191	-1.42312	91.3808	-0.103878
9.28767	107.897	12.5183	-1.42189	91.3749	-0.103788
9.296	107.985	12.5175	-1.42069	91.369	-0.1037
9.30433	108.064	12.5167	-1.41941	91.3631	-0.103607
9.31267	108.154	12.5159	-1.41813	91.3574	-0.103514
9.321	108.231	12.5152	-1.41685	91.3518	-0.10342
9.32933	108.317	12.5144	-1.41556	91.3461	-0.103326
9.33767	108.399	12.5136	-1.41429	91.3403	-0.103233
9.346	108.492	12.5128	-1.41306	91.3343	-0.103144
9.35433	108.568	12.512	-1.41187	91.3287	-0.103057
9.36267	108.658	12.5113	-1.41066	91.3233	-0.102968
9.371	108.737	12.5105	-1.40943	91.3178	-0.102879
9.37933	108.824	12.5097	-1.40818	91.3122	-0.102787
9.38767	108.911	12.509	-1.40696	91.3068	-0.102698
9.396	109	12.5082	-1.40578	91.301	-0.102612
9.40433	109.078	12.5074	-1.4046	91.2954	-0.102526
9.41267	109.162	12.5067	-1.40341	91.29	-0.102439
9.421	109.251	12.506	-1.40222	91.2847	-0.102352
9.42933	109.335	12.5052	-1.40101	91.2792	-0.102264
9.43767	109.417	12.5044	-1.39979	91.2735	-0.102175
9.446	109.507	12.5037	-1.39861	91.2681	-0.102088
9.45433	109.588	12.5029	-1.39742	91.2625	-0.102002
9.46267	109.675	12.5022	-1.39625	91.257	-0.101916
9.471	109.754	12.5014	-1.39509	91.2514	-0.101832
9.47933	109.844	12.5007	-1.3939	91.246	-0.101745
9.48767	109.927	12.4999	-1.39273	91.2406	-0.101659
9.496	110.012	12.4992	-1.39155	91.235	-0.101573
9.50433	110.092	12.4984	-1.39034	91.2295	-0.101485
9.51267	110.178	12.4976	-1.38916	91.2239	-0.101399
9.521	110.26	12.4969	-1.388	91.2186	-0.101314
9.52933	110.344	12.4961	-1.38682	91.2129	-0.101228
9.53767	110.431	12.4954	-1.38562	91.2075	-0.101141
9.546	110.521	12.4947	-1.38443	91.2022	-0.101054
9.55433	110.605	12.4939	-1.38323	91.1967	-0.100966
9.56267	110.686	12.4931	-1.38204	91.1911	-0.100879
9.571	110.777	12.4924	-1.38086	91.1857	-0.100793
9.57933	110.862	12.4917	-1.37969	91.1803	-0.100708
9.58767	110.94	12.4909	-1.37856	91.1749	-0.100625
9.596	111.028	12.4902	-1.3774	91.1694	-0.100541
9.60433	111.109	12.4894	-1.37625	91.1639	-0.100457
9.61267	111.199	12.4887	-1.37508	91.1585	-0.100371
9.621	111.278	12.4879	-1.37397	91.1531	-0.10029
9.62933	111.369	12.4872	-1.37284	91.1475	-0.100207
9.63767	111.452	12.4864	-1.37171	91.1421	-0.100125
9.646	111.538	12.4857	-1.37058	91.1368	-0.100043
9.65433	111.621	12.485	-1.36946	91.1314	-0.0999607
9.66267	111.705	12.4842	-1.36833	91.126	-0.0998784
9.671	111.785	12.4835	-1.3672	91.1206	-0.0997961
9.67933	111.875	12.4827	-1.36606	91.1153	-0.0997129
9.68767	111.956	12.482	-1.36493	91.1101	-0.09963
9.696	112.041	12.4813	-1.36381	91.1049	-0.0995487
9.70433	112.131	12.4806	-1.36267	91.0995	-0.099465
9.71267	112.218	12.4799	-1.36154	91.0942	-0.0993829
9.721	112.299	12.4791	-1.36042	91.0889	-0.0993014
9.72933	112.383	12.4784	-1.35929	91.0835	-0.0992189
9.73767	112.471	12.4777	-1.35817	91.0781	-0.099137
9.746	112.56	12.4769	-1.35709	91.0728	-0.0990581
9.75433	112.637	12.4762	-1.35598	91.0678	-0.0989772
9.76267	112.724	12.4755	-1.35489	91.0626	-0.0988973
9.771	112.808	12.4748	-1.35381	91.0573	-0.0988183
9.77933	112.891	12.4741	-1.35274	91.0519	-0.0987401
9.78767	112.971	12.4733	-1.35166	91.0466	-0.0986617
9.796	113.064	12.4726	-1.35059	91.0413	-0.0985836
9.80433	113.15	12.4719	-1.34948	91.036	-0.0985025
9.81267	113.23	12.4712	-1.34843	91.0307	-0.0984256
9.821	113.314	12.4705	-1.34735	91.0256	-0.0983473
9.82933	113.395	12.4698	-1.34626	91.0205	-0.0982672
9.83767	113.481	12.469	-1.34517	91.0151	-0.0981882
9.846	113.568	12.4683	-1.34413	91.0098	-0.0981123
9.85433	113.651	12.4676	-1.34306	91.0046	-0.0980339
9.86267	113.739	12.4669	-1.34198	90.9994	-0.097955
9.871	113.822	12.4662	-1.34093	90.9942	-0.0978782
9.87933	113.905	12.4655	-1.33987	90.9892	-0.0978012
9.88767	113.986	12.4648	-1.33885	90.9841	-0.0977265
9.896	114.072	12.4641	-1.33778	90.9788	-0.0976486
9.90433	114.162	12.4633	-1.33674	90.9736	-0.0975725
9.91267	114.241	12.4626	-1.33569	90.9684	-0.0974958
9.921	114.326	12.4619	-1.33465	90.9631	-0.0974201
9.92933	114.411	12.4612	-1.33356	90.958	-0.0973408
9.93767	114.492	12.4605	-1.33251	90.9528	-0.0972638
9.946	114.583	12.4598	-1.33146	90.9479	-0.0971874
9.95433	114.665	12.4591	-1.33041	90.9428	-0.0971103
9.96267	114.75	12.4584	-1.32936	90.9376	-0.0970339
9.971	114.828	12.4577	-1.32835	90.9324	-0.0969604
9.97933	114.912	12.457	-1.32732	90.9273	-0.0968848
9.98767	115.001	12.4563	-1.32629	90.9221	-0.0968096
9.996	115.084	12.4556	-1.32529	90.917	-0.0967368
10.0043	115.167	12.4549	-1.32429	90.9119	-0.0966639
10.0127	115.248	12.4542	-1.32332	90.9068	-0.0965928
10.021	115.338	12.4535	-1.32233	90.9014	-0.0965211
10.0293	115.423	12.4527	-1.32136	90.8963	-0.0964503
10.0377	115.511	12.452	-1.32033	90.8912	-0.0963751
10.046	115.593	12.4513	-1.31932	90.8861	-0.0963007
10.0543	115.68	12.4507	-1.31829	90.8811	-0.0962258
10.0627	115.766	12.45	-1.31729	90.876	-0.0961531
10.071	115.845	12.4493	-1.31631	90.8709	-0.0960814
10.0793	115.933	12.4486	-1.31528	90.8659	-0.0960063
10.0877	116.017	12.4479	-1.31428	90.8608	-0.0959332
10.096	116.1	12.4472	-1.31327	90.8557	-0.0958593
10.1043	116.189	12.4465	-1.31228	90.8508	-0.0957876
10.1127	116.267	12.4458	-1.31126	90.8457	-0.0957127
10.121	116.35	12.4451	-1.31033	90.8408	-0.095645
10.1293	116.436	12.4445	-1.30941	90.836	-0.0955777
10.1377	116.521	12.4438	-1.30843	90.8309	-0.0955063
10.146	116.605	12.4431	-1.30748	90.826	-0.0954366
10.1543	116.686	12.4424	-1.30652	90.821	-0.0953669
10.1627	116.773	12.4417	-1.30557	90.816	-0.0952971
10.171	116.856	12.4411	-1.30459	90.8109	-0.0952258
10.1793	116.944	12.4404	-1.30363	90.806	-0.0951557
10.1877	117.026	12.4397	-1.30264	90.8013	-0.0950838
10.196	117.11	12.439	-1.3017	90.7963	-0.0950149
10.2043	117.196	12.4383	-1.30073	90.7911	-0.0949442
10.2127	117.279	12.4376	-1.29976	90.7861	-0.0948736
10.221	117.361	12.437	-1.29882	90.7811	-0.0948045
10.2293	117.45	12.4363	-1.29785	90.7762	-0.0947336
10.2377	117.537	12.4356	-1.29688	90.7713	-0.0946629
10.246	117.616	12.4349	-1.29596	90.7663	-0.0945963
10.2543	117.698	12.4343	-1.29505	90.7613	-0.0945297
10.2627	117.781	12.4336	-1.29415	90.7563	-0.0944639
10.271	117.868	12.4329	-1.29324	90.7512	-0.0943974
10.2793	117.951	12.4322	-1.29231	90.7462	-0.0943297
10.2877	118.036	12.4315	-1.2914	90.7411	-0.0942631
10.296	118.122	12.4308	-1.29047	90.7362	-0.0941954
10.3043	118.207	12.4301	-1.28958	90.7312	-0.09413
10.3127	118.289	12.4294	-1.28869	90.7262	-0.0940652
10.321	118.375	12.4288	-1.2878	90.7214	-0.0940002
10.3293	118.456	12.4281	-1.28689	90.7166	-0.093934
10.3377	118.539	12.4275	-1.286	90.7118	-0.093869
10.346	118.622	12.4268	-1.28511	90.7069	-0.0938039
10.3543	118.71	12.4261	-1.28424	90.7019	-0.0937408
10.3627	118.794	12.4255	-1.28338	90.6972	-0.0936777
10.371	118.879	12.4248	-1.28251	90.6926	-0.0936142
10.3793	118.967	12.4242	-1.28166	90.6876	-0.0935522
10.3877	119.048	12.4235	-1.28079	90.6827	-0.0934883
10.396	119.13	12.4228	-1.2799	90.678	-0.0934236
10.4043	119.215	12.4222	-1.27901	90.673	-0.0933587
10.4127	119.295	12.4215	-1.27814	90.6681	-0.0932954
10.421	119.384	12.4208	-1.27727	90.6633	-0.0932321
10.4293	119.469	12.4202	-1.2764	90.6584	-0.0931685
10.4377	119.555	12.4195	-1.27557	90.6538	-0.0931075
10.446	119.635	12.4188	-1.27472	90.6488	-0.0930457
10.4543	119.719	12.4182	-1.27388	90.6438	-0.0929839
10.4627	119.805	12.4175	-1.27301	90.639	-0.0929211
10.471	119.891	12.4169	-1.27218	90.6343	-0.09286
10.4793	119.972	12.4162	-1.2714	90.6295	-0.0928029
10.4877	120.053	12.4155	-1.27058	90.6246	-0.0927434
10.496	120.137	12.4149	-1.26975	90.6198	-0.0926828
10.5043	120.225	12.4142	-1.26889	90.615	-0.09262
10.5127	120.309	12.4135	-1.26808	90.6101	-0.0925606
10.521	120.393	12.4129	-1.26723	90.6051	-0.0924992
10.5293	120.478	12.4122	-1.26642	90.6005	-0.0924401
10.5377	120.563	12.4115	-1.26561	90.5954	-0.0923805
10.546	120.642	12.4109	-1.26479	90.5906	-0.0923211
10.5543	120.727	12.4102	-1.26399	90.5856	-0.0922622
10.5627	120.809	12.4095	-1.26318	90.5807	-0.0922035
10.571	120.891	12.4088	-1.26241	90.5757	-0.0921471
10.5793	120.976	12.4082	-1.26163	90.571	-0.0920898
10.5877	121.06	12.4075	-1.26091	90.5661	-0.0920375
10.596	121.141	12.4069	-1.26014	90.5615	-0.0919812
10.6043	121.229	12.4062	-1.25939	90.5568	-0.0919265
10.6127	121.311	12.4056	-1.25864	90.5522	-0.0918721
10.621	121.4	12.405	-1.25786	90.5477	-0.0918152
10.6293	121.482	12.4044	-1.25712	90.543	-0.0917606
10.6377	121.564	12.4037	-1.25637	90.5384	-0.091706
10.646	121.648	12.4031	-1.25562	90.5337	-0.0916514
10.6543	121.732	12.4025	-1.25487	90.5292	-0.0915965
10.6627	121.819	12.4018	-1.25409	90.5245	-0.0915398
10.671	121.904	12.4011	-1.25329	90.5197	-0.0914814
10.6793	121.986	12.4005	-1.25253	90.5148	-0.0914257
10.6877	122.072	12.3998	-1.25178	90.51	-0.0913708
10.696	122.156	12.3992	-1.25102	90.5051	-0.0913154
10.7043	122.237	12.3985	-1.2503	90.5003	-0.0912634
10.7127	122.327	12.3978	-1.24955	90.4955	-0.0912083
10.721	122.409	12.3972	-1.24882	90.4908	-0.0911552
10.7293	122.488	12.3965	-1.24808	90.4861	-0.0911012
10.7377	122.577	12.3959	-1.24736	90.4813	-0.0910487
10.746	122.657	12.3953	-1.24671	90.4766	-0.091001
10.7543	122.742	12.3946	-1.24605	90.472	-0.090953
10.7627	122.828	12.394	-1.24536	90.4673	-0.0909026
10.771	122.912	12.3933	-1.24466	90.4624	-0.0908511
10.7793	122.996	12.3927	-1.24398	90.4577	-0.0908019
10.7877	123.082	12.392	-1.24326	90.453	-0.0907491
10.796	123.164	12.3914	-1.2426	90.4482	-0.0907012
10.8043	123.246	12.3907	-1.24193	90.4435	-0.0906523
10.8127	123.332	12.3901	-1.24125	90.4389	-0.0906028
10.821	123.416	12.3894	-1.24059	90.4342	-0.0905542
10.8293	123.495	12.3888	-1.23989	90.4294	-0.0905035
10.8377	123.578	12.3881	-1.23919	90.4247	-0.090452
10.846	123.666	12.3875	-1.23853	90.4201	-0.090404
10.8543	123.749	12.3869	-1.23785	90.4157	-0.0903541
10.8627	123.834	12.3862	-1.23715	90.4108	-0.090303
10.871	123.918	12.3856	-1.23651	90.4063	-0.0902562
10.8793	124.002	12.385	-1.23582	90.4017	-0.0902062
10.8877	124.086	12.3844	-1.23513	90.3971	-0.0901556
10.896	124.17	12.3837	-1.23444	90.3924	-0.0901057
10.9043	124.259	12.3831	-1.23377	90.3878	-0.0900566
10.9127	124.337	12.3825	-1.23311	90.3832	-0.0900081
10.921	124.425	12.3818	-1.23244	90.3787	-0.0899597
10.9293	124.508	12.3812	-1.23175	90.3741	-0.0899093
10.9377	124.588	12.3806	-1.23111	90.3694	-0.0898624
10.946	124.674	12.3799	-1.23048	90.3647	-0.0898165
10.9543	124.756	12.3793	-1.22979	90.36	-0.0897662
10.9627	124.843	12.3786	-1.22914	90.3554	-0.0897186
10.971	124.925	12.378	-1.22851	90.3507	-0.0896729
10.9793	125.011	12.3774	-1.22789	90.3461	-0.0896275
10.9877	125.097	12.3767	-1.22725	90.3416	-0.0895806
10.996	125.177	12.3761	-1.22657	90.3368	-0.0895308
11.0043	125.264	12.3754	-1.22593	90.3318	-0.0894846
11.0127	125.35	12.3748	-1.22532	90.327	-0.0894397
11.021	125.434	12.3742	-1.22467	90.3226	-0.0893922
11.0293	125.516	12.3735	-1.22399	90.3181	-0.0893428
11.0377	125.601	12.3729	-1.2234	90.3135	-0.0892995
11.046	125.684	12.3723	-1.22277	90.3088	-0.0892535
11.0543	125.762	12.3716	-1.22212	90.3043	-0.0892064
11.0627	125.851	12.371	-1.22147	90.2997	-0.0891589
11.071	125.938	12.3704	-1.22083	90.295	-0.0891118
11.0793	126.017	12.3698	-1.22021	90.2905	-0.089067
11.0877	126.107	12.3692	-1.21958	90.2862	-0.0890204
11.096	126.186	12.3685	-1.21896	90.2816	-0.0889757
11.1043	126.272	12.3679	-1.21835	90.2768	-0.0889309
11.1127	126.357	12.3672	-1.21778	90.272	-0.0888891
11.121	126.439	12.3666	-1.21719	90.2674	-0.0888466
11.1293	126.523	12.366	-1.21661	90.2628	-0.088804
11.1377	126.602	12.3653	-1.21604	90.2581	-0.0887621
11.146	126.687	12.3647	-1.21548	90.2535	-0.0887214
11.1543	126.773	12.3641	-1.21487	90.2489	-0.0886771
11.1627	126.859	12.3634	-1.21429	90.2441	-0.0886345
11.171	126.945	12.3628	-1.21368	90.2394	-0.0885903
11.1793	127.032	12.3621	-1.21309	90.2348	-0.0885471
11.1877	127.107	12.3615	-1.21253	90.2301	-0.0885062
11.196	127.2	12.3608	-1.21191	90.2254	-0.088461
11.2043	127.283	12.3602	-1.21126	90.2211	-0.0884135
11.2127	127.366	12.3596	-1.21068	90.2165	-0.0883708
11.221	127.447	12.359	-1.21007	90.2121	-0.0883266
11.2293	127.531	12.3584	-1.20945	90.2074	-0.0882816
11.2377	127.615	12.3578	-1.20888	90.203	-0.0882398
11.246	127.7	12.3572	-1.20831	90.1987	-0.0881981
11.2543	127.785	12.3566	-1.20776	90.1944	-0.0881584
11.2627	127.872	12.356	-1.20717	90.19	-0.0881152
11.271	127.953	12.3554	-1.20659	90.1856	-0.0880726
11.2793	128.036	12.3548	-1.20604	90.1812	-0.0880326
11.2877	128.121	12.3541	-1.2055	90.1765	-0.0879929
11.296	128.204	12.3535	-1.20491	90.172	-0.0879499
11.3043	128.292	12.3529	-1.20432	90.1675	-0.0879072
11.3127	128.376	12.3523	-1.20377	90.1632	-0.0878667
11.321	128.46	12.3517	-1.20322	90.1588	-0.0878263
11.3293	128.543	12.3511	-1.20266	90.1541	-0.0877859
11.3377	128.629	12.3504	-1.20212	90.1495	-0.0877465
11.346	128.716	12.3498	-1.20156	90.145	-0.0877056
11.3543	128.798	12.3492	-1.20097	90.1406	-0.0876622
11.3627	128.88	12.3486	-1.20037	90.1363	-0.0876187
11.371	128.961	12.348	-1.19984	90.1318	-0.0875797
11.3793	129.048	12.3474	-1.1993	90.1271	-0.0875403
11.3877	129.131	12.3468	-1.19875	90.1226	-0.0875003
11.396	129.22	12.3461	-1.1982	90.1178	-0.0874601
11.4043	129.306	12.3455	-1.19764	90.1132	-0.0874192
11.4127	129.384	12.3448	-1.19706	90.1085	-0.087377
11.421	129.467	12.3442	-1.19647	90.1038	-0.0873339
11.4293	129.549	12.3436	-1.1959	90.0993	-0.0872924
11.4377	129.638	12.3429	-1.19538	90.0948	-0.0872542
11.446	129.722	12.3423	-1.19483	90.0901	-0.0872141
11.4543	129.804	12.3417	-1.19425	90.0857	-0.0871721
11.4627	129.891	12.3411	-1.19368	90.0811	-0.0871304
11.471	129.973	12.3405	-1.19313	90.0766	-0.0870902
11.4793	130.057	12.3398	-1.1926	90.0722	-0.0870513
11.4877	130.141	12.3392	-1.19207	90.0676	-0.0870129
11.496	130.221	12.3386	-1.19155	90.0633	-0.0869748
11.5043	130.303	12.338	-1.19105	90.059	-0.0869383
11.5127	130.39	12.3374	-1.19055	90.0545	-0.0869019
11.521	130.476	12.3368	-1.19003	90.05	-0.0868639
11.5293	130.556	12.3362	-1.18953	90.0454	-0.0868273
11.5377	130.643	12.3356	-1.189	90.0409	-0.0867883
11.546	130.727	12.335	-1.18846	90.0366	-0.0867494
11.5543	130.813	12.3344	-1.18794	90.0322	-0.0867114
11.5627	130.894	12.3337	-1.18741	90.0276	-0.0866724
11.571	130.979	12.3331	-1.18688	90.0231	-0.0866342
11.5793	131.062	12.3325	-1.18636	90.0184	-0.0865959
11.5877	131.153	12.3318	-1.18581	90.0138	-0.0865556
11.596	131.229	12.3312	-1.18529	90.0092	-0.0865179
11.6043	131.317	12.3306	-1.18477	90.0046	-0.0864802
11.6127	131.403	12.33	-1.18427	90	-0.0864431
11.621	131.482	12.3293	-1.18376	89.9954	-0.0864061
11.6293	131.568	12.3287	-1.18328	89.9907	-0.0863712
11.6377	131.646	12.3281	-1.18279	89.9862	-0.0863351
11.646	131.731	12.3275	-1.18227	89.9817	-0.0862972
11.6543	131.817	12.3268	-1.18173	89.9773	-0.0862578
11.6627	131.892	12.3262	-1.18123	89.973	-0.0862218
11.671	131.982	12.3256	-1.18077	89.9685	-0.0861877
11.6793	132.071	12.325	-1.18026	89.964	-0.0861506
11.6877	132.153	12.3244	-1.17975	89.9596	-0.0861137
11.696	132.241	12.3238	-1.17923	89.9551	-0.0860756
11.7043	132.322	12.3232	-1.17873	89.9508	-0.0860391
11.7127	132.406	12.3226	-1.1782	89.9465	-0.0860002
11.721	132.487	12.322	-1.1777	89.9422	-0.0859641
11.7293	132.577	12.3214	-1.17721	89.9378	-0.0859283
11.7377	132.66	12.3208	-1.17671	89.9334	-0.0858915
11.746	132.74	12.3202	-1.17616	89.9292	-0.0858516
11.7543	132.827	12.3197	-1.17561	89.9249	-0.0858109
11.7627	132.903	12.3191	-1.17508	89.9205	-0.0857724
11.771	132.985	12.3185	-1.17453	89.9162	-0.0857321
11.7793	133.077	12.3179	-1.17402	89.9118	-0.0856951
11.7877	133.159	12.3173	-1.17347	89.9073	-0.0856553
11.796	133.246	12.3166	-1.17295	89.9029	-0.0856169
11.8043	133.33	12.3161	-1.1724	89.8985	-0.0855767
11.8127	133.411	12.3154	-1.17183	89.8941	-0.0855356
11.821	133.499	12.3148	-1.17129	89.8896	-0.0854959
11.8293	133.582	12.3142	-1.17078	89.8851	-0.0854586
11.8377	133.663	12.3136	-1.17024	89.8808	-0.0854193
11.846	133.748	12.313	-1.16967	89.8765	-0.085378
11.8543	133.827	12.3124	-1.16913	89.8722	-0.0853381
11.8627	133.914	12.3118	-1.16855	89.8678	-0.0852959
11.871	134	12.3113	-1.16799	89.8636	-0.0852553
11.8793	134.081	12.3107	-1.16744	89.8595	-0.0852149
11.8877	134.163	12.3101	-1.16687	89.8552	-0.0851735
11.896	134.249	12.3095	-1.16631	89.8511	-0.0851327
11.9043	134.336	12.309	-1.16578	89.8468	-0.0850938
11.9127	134.418	12.3084	-1.16521	89.8424	-0.085052
11.921	134.503	12.3078	-1.16464	89.8381	-0.0850105
11.9293	134.588	12.3072	-1.16409	89.8339	-0.08497
11.9377	134.669	12.3066	-1.16353	89.8297	-0.0849292
11.946	134.752	12.3061	-1.16296	89.8256	-0.0848879
11.9543	134.833	12.3055	-1.16237	89.8213	-0.0848452
11.9627	134.92	12.3049	-1.1618	89.817	-0.0848031
11.971	135.004	12.3043	-1.16121	89.8126	-0.08476
11.9793	135.092	12.3037	-1.16064	89.8082	-0.0847188
11.9877	135.177	12.3031	-1.16005	89.8041	-0.0846753
11.996	135.259	12.3025	-1.15948	89.7997	-0.0846341
12.0043	135.341	12.3019	-1.1589	89.7954	-0.0845918
12.0127	135.423	12.3013	-1.15833	89.791	-0.0845497
12.021	135.508	12.3007	-1.15771	89.7867	-0.0845046
12.0293	135.588	12.3002	-1.15709	89.7824	-0.0844596
12.0377	135.676	12.2995	-1.15651	89.7779	-0.0844173
12.046	135.761	12.299	-1.15591	89.7738	-0.0843732
12.0543	135.844	12.2984	-1.15529	89.7695	-0.0843282
12.0627	135.925	12.2978	-1.15466	89.7654	-0.0842818
12.071	136.014	12.2972	-1.15404	89.7611	-0.0842369
12.0793	136.096	12.2967	-1.15338	89.7575	-0.0841886
12.0877	136.181	12.2962	-1.15275	89.7535	-0.0841426
12.096	136.268	12.2956	-1.15211	89.7495	-0.0840957
12.1043	136.349	12.2951	-1.15149	89.7454	-0.0840506
12.1127	136.433	12.2945	-1.15085	89.7414	-0.084004
12.121	136.511	12.294	-1.15022	89.7377	-0.0839577
12.1293	136.6	12.2935	-1.14957	89.7338	-0.0839107
12.1377	136.685	12.2929	-1.14898	89.7297	-0.0838671
12.146	136.772	12.2924	-1.14834	89.7256	-0.0838209
12.1543	136.853	12.2918	-1.14767	89.7214	-0.0837715
12.1627	136.938	12.2912	-1.14704	89.717	-0.0837256
12.171	137.019	12.2906	-1.14639	89.7128	-0.0836786
12.1793	137.107	12.2901	-1.14573	89.7088	-0.0836302
12.1877	137.189	12.2895	-1.14507	89.7046	-0.0835818
12.196	137.275	12.2889	-1.14444	89.7005	-0.0835361
12.2043	137.358	12.2884	-1.14377	89.6964	-0.0834869
12.2127	137.445	12.2878	-1.14311	89.6922	-0.0834391
12.221	137.523	12.2872	-1.1424	89.6882	-0.0833868
12.2293	137.605	12.2867	-1.14172	89.6843	-0.0833374
12.2377	137.693	12.2862	-1.14109	89.6803	-0.0832913
12.246	137.778	12.2857	-1.14041	89.6766	-0.083242
12.2543	137.86	12.2851	-1.13974	89.6726	-0.0831929
12.2627	137.943	12.2846	-1.13907	89.6686	-0.0831438
12.271	138.028	12.284	-1.13839	89.6648	-0.0830948
12.2793	138.115	12.2835	-1.13772	89.6607	-0.0830454
12.2877	138.196	12.2829	-1.13707	89.6567	-0.082998
12.296	138.281	12.2823	-1.13638	89.6525	-0.0829476
12.3043	138.359	12.2818	-1.1357	89.6485	-0.0828983
12.3127	138.447	12.2813	-1.135	89.6446	-0.0828473
12.321	138.529	12.2807	-1.13429	89.6407	-0.082795
12.3293	138.618	12.2802	-1.13357	89.6367	-0.0827423
12.3377	138.701	12.2796	-1.13282	89.6327	-0.0826882
12.346	138.78	12.2791	-1.13211	89.6289	-0.0826358
12.3543	138.863	12.2786	-1.13139	89.6249	-0.0825835
12.3627	138.953	12.278	-1.13065	89.621	-0.0825297
12.371	139.037	12.2775	-1.12991	89.617	-0.0824756
12.3793	139.124	12.2769	-1.12921	89.6131	-0.0824242
12.3877	139.205	12.2764	-1.12851	89.6092	-0.0823731
12.396	139.29	12.2759	-1.12781	89.6051	-0.0823225
12.4043	139.365	12.2753	-1.12711	89.6013	-0.0822708
12.4127	139.455	12.2748	-1.12641	89.5973	-0.0822202
12.421	139.538	12.2743	-1.12573	89.5934	-0.0821704
12.4293	139.62	12.2737	-1.12501	89.5894	-0.0821175
12.4377	139.704	12.2732	-1.12427	89.5856	-0.0820639
12.446	139.788	12.2727	-1.12355	89.5818	-0.082011
12.4543	139.874	12.2722	-1.12282	89.5781	-0.0819582
12.4627	139.959	12.2717	-1.1221	89.5746	-0.0819056
12.471	140.044	12.2712	-1.12139	89.5711	-0.0818536
12.4793	140.127	12.2707	-1.12065	89.5675	-0.0817996
12.4877	140.213	12.2702	-1.11991	89.5636	-0.0817458
12.496	140.294	12.2697	-1.1192	89.5599	-0.0816939
12.5043	140.376	12.2691	-1.11845	89.5561	-0.0816393
12.5127	140.461	12.2686	-1.11773	89.5524	-0.0815867
12.521	140.547	12.2681	-1.11702	89.5486	-0.0815349
12.5293	140.631	12.2676	-1.11628	89.5448	-0.0814809
12.5377	140.715	12.2671	-1.11558	89.541	-0.0814293
12.546	140.799	12.2665	-1.11487	89.537	-0.0813774
12.5543	140.882	12.266	-1.11414	89.533	-0.0813241
12.5627	140.969	12.2654	-1.1134	89.5292	-0.0812702
12.571	141.046	12.2649	-1.11267	89.5254	-0.0812171
12.5793	141.132	12.2644	-1.11192	89.5216	-0.0811623
12.5877	141.215	12.2639	-1.11119	89.518	-0.0811092
12.596	141.3	12.2634	-1.11046	89.5143	-0.0810556
12.6043	141.385	12.2629	-1.1097	89.5107	-0.0810007
12.6127	141.473	12.2624	-1.10898	89.507	-0.080948
12.621	141.552	12.2619	-1.10822	89.5034	-0.080892
12.6293	141.639	12.2614	-1.10744	89.4999	-0.0808351
12.6377	141.722	12.2609	-1.1067	89.4962	-0.0807812
12.646	141.809	12.2604	-1.10597	89.4926	-0.0807283
12.6543	141.893	12.26	-1.10524	89.4891	-0.0806745
12.6627	141.978	12.2595	-1.1045	89.4855	-0.0806207
12.671	142.063	12.259	-1.10376	89.4817	-0.0805667
12.6793	142.144	12.2584	-1.10303	89.4779	-0.0805136
12.6877	142.232	12.2579	-1.10231	89.474	-0.0804605
12.696	142.314	12.2574	-1.10155	89.4704	-0.0804052
12.7043	142.4	12.2569	-1.1008	89.4666	-0.0803505
12.7127	142.483	12.2564	-1.10008	89.4629	-0.0802978
12.721	142.566	12.2559	-1.09932	89.4593	-0.0802425
12.7293	142.65	12.2554	-1.0986	89.4557	-0.08019
12.7377	142.73	12.2549	-1.09787	89.4519	-0.0801366
12.746	142.816	12.2544	-1.09711	89.4484	-0.0800815
12.7543	142.899	12.2539	-1.09638	89.4449	-0.0800284
12.7627	142.988	12.2534	-1.09564	89.4413	-0.0799741
12.771	143.069	12.2529	-1.09492	89.4377	-0.0799215
12.7793	143.16	12.2524	-1.0942	89.4342	-0.0798691
12.7877	143.237	12.252	-1.09348	89.4307	-0.0798163
12.796	143.323	12.2515	-1.09276	89.4273	-0.0797638
12.8043	143.402	12.251	-1.09203	89.4238	-0.0797105
12.8127	143.493	12.2506	-1.09126	89.4205	-0.0796546
12.821	143.578	12.2501	-1.09054	89.417	-0.0796018
12.8293	143.664	12.2496	-1.08981	89.4135	-0.0795488
12.8377	143.745	12.2491	-1.08908	89.41	-0.0794953
12.846	143.825	12.2487	-1.08835	89.4068	-0.0794419
12.8543	143.91	12.2482	-1.08762	89.4033	-0.0793884
12.8627	143.997	12.2477	-1.08688	89.3997	-0.0793345
12.871	144.078	12.2472	-1.08613	89.3962	-0.0792801
12.8793	144.163	12.2468	-1.08536	89.3927	-0.0792237
12.8877	144.249	12.2462	-1.0846	89.3889	-0.0791683
12.896	144.335	12.2457	-1.08386	89.3853	-0.079114
12.9043	144.416	12.2453	-1.08308	89.3819	-0.0790575
12.9127	144.498	12.2448	-1.08238	89.3785	-0.0790062
12.921	144.583	12.2443	-1.08163	89.3749	-0.0789515
12.9293	144.668	12.2438	-1.08087	89.3711	-0.0788957
12.9377	144.753	12.2433	-1.08014	89.3676	-0.0788423
12.946	144.839	12.2429	-1.07942	89.3643	-0.07879
12.9543	144.917	12.2424	-1.07874	89.3607	-0.0787407
12.9627	145.007	12.2419	-1.07803	89.3571	-0.0786889
12.971	145.087	12.2414	-1.07734	89.3536	-0.0786385
12.9793	145.178	12.2409	-1.07665	89.35	-0.0785877
12.9877	145.26	12.2404	-1.07594	89.3465	-0.0785361
12.996	145.344	12.2399	-1.0752	89.343	-0.0784821
13.0043	145.428	12.2395	-1.07445	89.3395	-0.0784273
13.0127	145.515	12.239	-1.07371	89.3361	-0.0783732
13.021	145.6	12.2386	-1.07296	89.3329	-0.0783187
13.0293	145.683	12.2381	-1.07221	89.3295	-0.078264
13.0377	145.766	12.2376	-1.07144	89.3262	-0.0782074
13.046	145.85	12.2372	-1.07072	89.3228	-0.0781554
13.0543	145.934	12.2367	-1.07	89.3195	-0.0781025
13.0627	146.017	12.2363	-1.06928	89.3164	-0.0780496
13.071	146.105	12.2358	-1.06857	89.313	-0.0779978
13.0793	146.189	12.2354	-1.06786	89.3096	-0.077946
13.0877	146.27	12.2349	-1.06718	89.3063	-0.0778967
13.096	146.354	12.2345	-1.06651	89.3032	-0.0778474
13.1043	146.437	12.234	-1.0658	89.2997	-0.0777962
13.1127	146.527	12.2335	-1.06513	89.2963	-0.0777471
13.121	146.607	12.2331	-1.06448	89.293	-0.0776995
13.1293	146.691	12.2326	-1.0638	89.2897	-0.0776497
13.1377	146.773	12.2322	-1.06312	89.2862	-0.0776001
13.146	146.857	12.2317	-1.0624	89.2827	-0.0775479
13.1543	146.944	12.2312	-1.06169	89.2794	-0.0774962
13.1627	147.024	12.2308	-1.06101	89.276	-0.0774462
13.171	147.113	12.2303	-1.06031	89.2724	-0.077395
13.1793	147.196	12.2298	-1.05963	89.2689	-0.0773456
13.1877	147.28	12.2293	-1.05894	89.2655	-0.077295
13.196	147.363	12.2289	-1.05827	89.2621	-0.0772461
13.2043	147.448	12.2284	-1.05754	89.2587	-0.0771931
13.2127	147.535	12.228	-1.05682	89.2556	-0.0771408
13.221	147.619	12.2276	-1.05611	89.2526	-0.0770883
13.2293	147.702	12.2271	-1.05544	89.2494	-0.0770394
13.2377	147.786	12.2267	-1.05475	89.246	-0.0769893
13.246	147.87	12.2262	-1.05403	89.2426	-0.0769369
13.2543	147.95	12.2257	-1.05335	89.2392	-0.076887
13.2627	148.039	12.2253	-1.05262	89.2359	-0.0768342
13.271	148.119	12.2248	-1.05194	89.2326	-0.0767841
13.2793	148.206	12.2244	-1.05123	89.2295	-0.0767325
13.2877	148.291	12.224	-1.05056	89.2262	-0.0766834
13.296	148.379	12.2235	-1.04987	89.2227	-0.0766328
13.3043	148.462	12.223	-1.0492	89.2192	-0.0765839
13.3127	148.547	12.2225	-1.04848	89.2159	-0.0765318
13.321	148.629	12.2221	-1.0478	89.2128	-0.0764822
13.3293	148.714	12.2217	-1.04714	89.2096	-0.0764341
13.3377	148.798	12.2212	-1.0465	89.2063	-0.0763873
13.346	148.882	12.2208	-1.0459	89.203	-0.0763433
13.3543	148.97	12.2203	-1.04524	89.1998	-0.0762952
13.3627	149.052	12.2198	-1.04453	89.1962	-0.0762432
13.371	149.135	12.2194	-1.04386	89.193	-0.0761941
13.3793	149.218	12.219	-1.04321	89.1899	-0.0761472
13.3877	149.302	12.2186	-1.04253	89.1869	-0.0760976
13.396	149.387	12.2181	-1.04193	89.1838	-0.0760536
13.4043	149.471	12.2177	-1.04127	89.1805	-0.0760055
13.4127	149.554	12.2173	-1.04059	89.1775	-0.0759557
13.421	149.637	12.2168	-1.03991	89.1743	-0.0759059
13.4293	149.725	12.2164	-1.0392	89.1712	-0.0758543
13.4377	149.808	12.216	-1.03854	89.1679	-0.0758058
13.446	149.891	12.2155	-1.03792	89.1649	-0.0757612
13.4543	149.976	12.2151	-1.03727	89.1617	-0.0757132
13.4627	150.06	12.2146	-1.03659	89.1582	-0.0756638
13.471	150.144	12.2142	-1.03595	89.155	-0.0756168
13.4793	150.227	12.2137	-1.03525	89.1518	-0.0755663
13.4877	150.314	12.2133	-1.0346	89.1486	-0.0755186
13.496	150.393	12.2128	-1.03396	89.1452	-0.075472
13.5043	150.48	12.2124	-1.03329	89.1422	-0.0754232
13.5127	150.566	12.212	-1.03265	89.139	-0.0753764
13.521	150.649	12.2116	-1.03199	89.1359	-0.0753282
13.5293	150.738	12.2112	-1.03131	89.1329	-0.0752782
13.5377	150.817	12.2107	-1.03064	89.1298	-0.0752294
13.546	150.903	12.2103	-1.03	89.1268	-0.075183
13.5543	150.984	12.2099	-1.02931	89.1234	-0.0751328
13.5627	151.071	12.2094	-1.02863	89.1203	-0.0750825
13.571	151.155	12.209	-1.02794	89.1173	-0.0750324
13.5793	151.239	12.2086	-1.02726	89.1143	-0.0749826
13.5877	151.328	12.2082	-1.02659	89.1112	-0.0749336
13.596	151.41	12.2078	-1.02591	89.1082	-0.0748839
13.6043	151.492	12.2073	-1.02523	89.1051	-0.0748348
13.6127	151.575	12.2069	-1.02458	89.102	-0.0747873
13.621	151.66	12.2065	-1.02392	89.0988	-0.0747391
13.6293	151.745	12.206	-1.02324	89.0956	-0.0746895
13.6377	151.825	12.2056	-1.02259	89.0926	-0.0746415
13.646	151.909	12.2052	-1.02195	89.0895	-0.0745949
13.6543	151.995	12.2048	-1.02131	89.0863	-0.0745487
13.6627	152.077	12.2043	-1.02065	89.0829	-0.0745003
13.671	152.166	12.2039	-1.01998	89.0797	-0.0744514
13.6793	152.25	12.2035	-1.01931	89.0767	-0.0744027
13.6877	152.334	12.2031	-1.01868	89.0738	-0.0743562
13.696	152.413	12.2026	-1.01801	89.0706	-0.0743079
13.7043	152.505	12.2022	-1.01736	89.0678	-0.0742601
13.7127	152.586	12.2019	-1.01668	89.0649	-0.0742103
13.721	152.669	12.2014	-1.01598	89.0619	-0.0741598
13.7293	152.752	12.201	-1.01531	89.0589	-0.0741105
13.7377	152.837	12.2006	-1.01463	89.0558	-0.0740611
13.746	152.922	12.2002	-1.01395	89.053	-0.0740116
13.7543	153.01	12.1998	-1.0133	89.05	-0.0739638
13.7627	153.088	12.1994	-1.01264	89.047	-0.0739154
13.771	153.173	12.1989	-1.01197	89.0437	-0.073867
13.7793	153.257	12.1985	-1.0113	89.0405	-0.073818
13.7877	153.347	12.1981	-1.01063	89.0374	-0.0737692
13.796	153.423	12.1976	-1.00999	89.0342	-0.0737219
13.8043	153.508	12.1972	-1.00936	89.0312	-0.0736764
13.8127	153.596	12.1968	-1.00872	89.0281	-0.0736292
13.821	153.679	12.1964	-1.00807	89.0251	-0.0735819
13.8293	153.76	12.196	-1.00745	89.0221	-0.0735369
13.8377	153.846	12.1956	-1.0068	89.0193	-0.0734892
13.846	153.929	12.1952	-1.00617	89.0164	-0.0734436
13.8543	154.014	12.1948	-1.00553	89.0137	-0.0733968
13.8627	154.095	12.1945	-1.0049	89.0111	-0.0733509
13.871	154.178	12.1941	-1.00427	89.0081	-0.0733045
13.8793	154.268	12.1937	-1.00363	89.0054	-0.0732579
13.8877	154.346	12.1933	-1.003	89.0024	-0.0732117
13.896	154.433	12.1929	-1.00236	88.9994	-0.0731654
13.9043	154.517	12.1925	-1.00173	88.9966	-0.0731195
13.9127	154.602	12.1921	-1.00109	88.9938	-0.0730725
13.921	154.682	12.1917	-1.00046	88.9908	-0.0730263
13.9293	154.769	12.1913	-0.999804	88.9877	-0.0729787
13.9377	154.855	12.1908	-0.99914	88.9844	-0.0729302
13.946	154.938	12.1904	-0.99847	88.9811	-0.0728813
13.9543	155.021	12.19	-0.997815	88.9781	-0.0728335
13.9627	155.109	12.1895	-0.997157	88.9751	-0.0727855
13.971	155.194	12.1891	-0.996515	88.9722	-0.0727386
13.9793	155.273	12.1888	-0.995872	88.9694	-0.0726916
13.9877	155.359	12.1884	-0.995247	88.9666	-0.072646
13.996	155.444	12.188	-0.994605	88.9635	-0.0725992
14.0043	155.522	12.1875	-0.993985	88.9605	-0.072554
14.0127	155.607	12.1872	-0.993344	88.9576	-0.0725071
14.021	155.693	12.1868	-0.992712	88.955	-0.072461
14.0293	155.779	12.1864	-0.992111	88.9524	-0.0724171
14.0377	155.86	12.186	-0.991476	88.9495	-0.0723708
14.046	155.944	12.1857	-0.99083	88.9468	-0.0723236
14.0543	156.031	12.1853	-0.990201	88.9439	-0.0722777
14.0627	156.113	12.1849	-0.989564	88.9409	-0.0722312
14.071	156.195	12.1844	-0.988914	88.9378	-0.0721837
14.0793	156.278	12.184	-0.988277	88.9348	-0.0721373
14.0877	156.361	12.1836	-0.987627	88.932	-0.0720899
14.096	156.452	12.1833	-0.98698	88.9293	-0.0720426
14.1043	156.534	12.1829	-0.986315	88.9265	-0.0719941
14.1127	156.618	12.1825	-0.985673	88.9236	-0.0719472
14.121	156.705	12.1821	-0.985052	88.9208	-0.0719018
14.1293	156.786	12.1817	-0.98446	88.9181	-0.0718586
14.1377	156.869	12.1814	-0.983869	88.9153	-0.0718155
14.146	156.957	12.181	-0.98324	88.9126	-0.0717696
14.1543	157.035	12.1806	-0.982606	88.91	-0.0717233
14.1627	157.126	12.1803	-0.981976	88.9076	-0.0716773
14.171	157.206	12.1799	-0.981339	88.9049	-0.0716308
14.1793	157.293	12.1795	-0.980723	88.9021	-0.0715859
14.1877	157.377	12.1791	-0.980135	88.8992	-0.071543
14.196	157.458	12.1788	-0.979495	88.8965	-0.0714963
14.2043	157.545	12.1784	-0.978865	88.8938	-0.0714503
14.2127	157.627	12.178	-0.978232	88.8909	-0.0714041
14.221	157.707	12.1777	-0.977575	88.8884	-0.0713561
14.2293	157.794	12.1773	-0.97697	88.8856	-0.0713119
14.2377	157.877	12.1769	-0.976369	88.8828	-0.0712681
14.246	157.962	12.1765	-0.975742	88.88	-0.0712223
14.2543	158.045	12.1761	-0.97513	88.8773	-0.0711776
14.2627	158.132	12.1758	-0.974512	88.8747	-0.0711325
14.271	158.213	12.1754	-0.973884	88.8721	-0.0710867
14.2793	158.295	12.1751	-0.973295	88.8693	-0.0710437
14.2877	158.381	12.1746	-0.972701	88.8664	-0.0710003
14.296	158.47	12.1743	-0.972079	88.8637	-0.0709549
14.3043	158.548	12.1739	-0.971453	88.8608	-0.0709092
14.3127	158.633	12.1735	-0.970837	88.8581	-0.0708643
14.321	158.717	12.1731	-0.9702	88.8554	-0.0708178
14.3293	158.8	12.1728	-0.969592	88.8525	-0.0707734
14.3377	158.887	12.1723	-0.968978	88.8496	-0.0707286
14.346	158.969	12.172	-0.968366	88.8468	-0.0706839
14.3543	159.051	12.1716	-0.96775	88.844	-0.0706389
14.3627	159.132	12.1712	-0.967129	88.8415	-0.0705936
14.371	159.215	12.1708	-0.966548	88.8386	-0.0705512
14.3793	159.302	12.1705	-0.965964	88.8357	-0.0705086
14.3877	159.388	12.1701	-0.965395	88.8332	-0.0704671
14.396	159.476	12.1698	-0.96478	88.8306	-0.0704221
14.4043	159.56	12.1694	-0.964187	88.828	-0.0703789
14.4127	159.639	12.1691	-0.963618	88.8256	-0.0703373
14.421	159.726	12.1687	-0.96303	88.823	-0.0702944
14.4293	159.808	12.1684	-0.962459	88.8204	-0.0702527
14.4377	159.896	12.168	-0.961871	88.8178	-0.0702099
14.446	159.975	12.1676	-0.961271	88.8151	-0.070166
14.4543	160.061	12.1673	-0.960645	88.8124	-0.0701203
14.4627	160.146	12.1669	-0.960038	88.8098	-0.070076
14.471	160.231	12.1665	-0.959427	88.8072	-0.0700314
14.4793	160.314	12.1662	-0.95885	88.8044	-0.0699893
14.4877	160.396	12.1658	-0.958276	88.8018	-0.0699474
14.496	160.481	12.1654	-0.957651	88.7992	-0.0699018
14.5043	160.563	12.1651	-0.957067	88.7965	-0.0698592
14.5127	160.653	12.1647	-0.956463	88.7937	-0.0698151
14.521	160.735	12.1643	-0.955878	88.7911	-0.0697724
14.5293	160.823	12.164	-0.955295	88.7885	-0.0697298
14.5377	160.906	12.1637	-0.954708	88.7861	-0.069687
14.546	160.983	12.1633	-0.95415	88.7835	-0.0696462
14.5543	161.067	12.1629	-0.953568	88.7808	-0.0696037
14.5627	161.149	12.1625	-0.952987	88.7781	-0.0695614
14.571	161.235	12.1622	-0.952418	88.7751	-0.0695198
14.5793	161.319	12.1618	-0.951877	88.7723	-0.0694803
14.5877	161.406	12.1614	-0.95134	88.7697	-0.0694411
14.596	161.491	12.1611	-0.950811	88.7672	-0.0694025
14.6043	161.569	12.1607	-0.95029	88.7645	-0.0693645
14.6127	161.657	12.1603	-0.949783	88.7618	-0.0693275
14.621	161.738	12.16	-0.949227	88.7591	-0.0692869
14.6293	161.82	12.1596	-0.948696	88.7565	-0.0692481
14.6377	161.906	12.1593	-0.948163	88.754	-0.0692092
14.646	161.987	12.1589	-0.947617	88.7513	-0.0691694
14.6543	162.071	12.1585	-0.94708	88.7488	-0.0691302
14.6627	162.156	12.1582	-0.946526	88.7463	-0.0690898
14.671	162.241	12.1578	-0.945962	88.7438	-0.0690486
14.6793	162.325	12.1575	-0.945412	88.7412	-0.0690085
14.6877	162.412	12.1571	-0.944846	88.7386	-0.0689671
14.696	162.491	12.1568	-0.944266	88.7359	-0.0689248
14.7043	162.573	12.1564	-0.943728	88.7335	-0.0688855
14.7127	162.66	12.1561	-0.94314	88.7308	-0.0688426
14.721	162.747	12.1557	-0.942561	88.7282	-0.0688003
14.7293	162.83	12.1554	-0.942006	88.7257	-0.0687598
14.7377	162.914	12.155	-0.941433	88.7231	-0.068718
14.746	162.996	12.1547	-0.940887	88.7204	-0.0686781
14.7543	163.08	12.1543	-0.940344	88.7178	-0.0686385
14.7627	163.158	12.1539	-0.939795	88.7151	-0.0685984
14.771	163.245	12.1536	-0.939225	88.7125	-0.0685568
14.7793	163.33	12.1532	-0.938679	88.71	-0.068517
14.7877	163.416	12.1529	-0.938146	88.7073	-0.0684781
14.796	163.497	12.1525	-0.937621	88.7046	-0.0684397
14.8043	163.582	12.1522	-0.937107	88.7021	-0.0684022
14.8127	163.669	12.1518	-0.93659	88.6997	-0.0683645
14.821	163.754	12.1515	-0.936049	88.6975	-0.068325
14.8293	163.837	12.1512	-0.935521	88.695	-0.0682865
14.8377	163.919	12.1509	-0.93499	88.6927	-0.0682477
14.846	164.002	12.1505	-0.93443	88.6903	-0.0682068
14.8543	164.084	12.1502	-0.933929	88.6877	-0.0681702
14.8627	164.167	12.1498	-0.933438	88.6852	-0.0681344
14.871	164.25	12.1495	-0.932914	88.683	-0.0680962
14.8793	164.338	12.1492	-0.932392	88.6808	-0.068058
14.8877	164.418	12.1489	-0.931856	88.6783	-0.0680189
14.896	164.505	12.1485	-0.931303	88.6758	-0.0679785
14.9043	164.586	12.1482	-0.930783	88.673	-0.0679406
14.9127	164.671	12.1478	-0.93027	88.6705	-0.0679032
14.921	164.755	12.1475	-0.929754	88.6683	-0.0678655
14.9293	164.836	12.1471	-0.92925	88.6657	-0.0678287
14.9377	164.921	12.1468	-0.928699	88.6633	-0.0677885
14.946	165.01	12.1465	-0.928159	88.661	-0.0677491
14.9543	165.09	12.1462	-0.927635	88.6585	-0.0677109
14.9627	165.174	12.1458	-0.927101	88.656	-0.0676719
14.971	165.262	12.1455	-0.92657	88.6534	-0.0676331
14.9793	165.341	12.1451	-0.92606	88.6508	-0.0675959
14.9877	165.429	12.1448	-0.925565	88.6483	-0.0675597
14.996	165.513	12.1444	-0.925035	88.6458	-0.0675211
15.0043	165.593	12.1441	-0.924482	88.6432	-0.0674807
15.0127	165.678	12.1437	-0.923952	88.6406	-0.067442
15.021	165.761	12.1434	-0.923467	88.6381	-0.0674066
15.0293	165.85	12.143	-0.922941	88.6353	-0.0673682
15.0377	165.93	12.1426	-0.922432	88.6325	-0.0673311
15.046	166.014	12.1422	-0.92194	88.6298	-0.0672951
15.0543	166.101	12.1419	-0.921475	88.6275	-0.0672612
15.0627	166.18	12.1416	-0.920987	88.6251	-0.0672256
15.071	166.265	12.1413	-0.92046	88.623	-0.0671871
15.0793	166.349	12.141	-0.919964	88.6206	-0.0671509
15.0877	166.433	12.1407	-0.919515	88.6183	-0.0671181
15.096	166.516	12.1403	-0.919046	88.6159	-0.0670839
15.1043	166.601	12.14	-0.918568	88.6137	-0.067049
15.1127	166.684	12.1397	-0.91811	88.6116	-0.0670156
15.121	166.766	12.1394	-0.917627	88.6093	-0.0669803
15.1293	166.852	12.1391	-0.917127	88.607	-0.0669438
15.1377	166.935	12.1388	-0.916609	88.6047	-0.066906
15.146	167.017	12.1385	-0.916098	88.6024	-0.0668687
15.1543	167.101	12.1381	-0.915618	88.6	-0.0668337
15.1627	167.185	12.1378	-0.915132	88.5974	-0.0667982
15.171	167.268	12.1374	-0.91463	88.5947	-0.0667616
15.1793	167.347	12.1371	-0.914149	88.5921	-0.0667264
15.1877	167.435	12.1367	-0.913623	88.5896	-0.066688
15.196	167.52	12.1364	-0.913107	88.5872	-0.0666504
15.2043	167.606	12.1361	-0.912597	88.5848	-0.0666132
15.2127	167.688	12.1357	-0.912094	88.5821	-0.0665764
15.221	167.77	12.1353	-0.911624	88.5794	-0.0665422
15.2293	167.856	12.135	-0.911162	88.5768	-0.0665084
15.2377	167.939	12.1347	-0.91069	88.5745	-0.0664739
15.246	168.023	12.1343	-0.910194	88.572	-0.0664377
15.2543	168.111	12.134	-0.909676	88.5698	-0.0664
15.2627	168.192	12.1337	-0.909163	88.5675	-0.0663625
15.271	168.276	12.1334	-0.908702	88.565	-0.0663289
15.2793	168.356	12.133	-0.908208	88.5626	-0.0662928
15.2877	168.44	12.1327	-0.907729	88.5601	-0.0662579
15.296	168.522	12.1324	-0.907256	88.5578	-0.0662233
15.3043	168.613	12.1321	-0.906742	88.5557	-0.0661858
15.3127	168.691	12.1318	-0.906265	88.5535	-0.066151
15.321	168.776	12.1314	-0.905786	88.5511	-0.066116
15.3293	168.865	12.1311	-0.905279	88.5487	-0.066079
15.3377	168.942	12.1308	-0.904815	88.5465	-0.0660452
15.346	169.029	12.1305	-0.90437	88.5442	-0.0660126
15.3543	169.115	12.1302	-0.903906	88.5418	-0.0659788
15.3627	169.196	12.1298	-0.903434	88.5393	-0.0659443
15.371	169.281	12.1295	-0.902974	88.537	-0.0659107
15.3793	169.367	12.1292	-0.902517	88.5346	-0.0658774
15.3877	169.447	12.1289	-0.902049	88.5323	-0.0658432
15.396	169.53	12.1286	-0.901567	88.5299	-0.0658081
15.4043	169.615	12.1282	-0.901089	88.5275	-0.0657732
15.4127	169.7	12.1279	-0.900651	88.5251	-0.0657412
15.421	169.784	12.1276	-0.9002	88.5228	-0.0657083
15.4293	169.867	12.1273	-0.899721	88.5206	-0.0656733
15.4377	169.95	12.127	-0.899233	88.5184	-0.0656377
15.446	170.034	12.1267	-0.898792	88.5162	-0.0656055
15.4543	170.118	12.1264	-0.898315	88.5141	-0.0655707
15.4627	170.206	12.1261	-0.897852	88.5119	-0.0655369
15.471	170.289	12.1258	-0.897421	88.5095	-0.0655055
15.4793	170.372	12.1255	-0.896969	88.5073	-0.0654724
15.4877	170.456	12.1252	-0.896514	88.5051	-0.0654392
15.496	170.54	12.1249	-0.896078	88.5029	-0.0654074
15.5043	170.623	12.1245	-0.895638	88.5005	-0.0653753
15.5127	170.707	12.1242	-0.895194	88.4979	-0.0653429
15.521	170.792	12.1239	-0.894743	88.4957	-0.06531
15.5293	170.879	12.1236	-0.894273	88.4935	-0.0652756
15.5377	170.96	12.1232	-0.89383	88.4911	-0.0652433
15.546	171.046	12.1229	-0.893392	88.4889	-0.0652113
15.5543	171.128	12.1226	-0.892935	88.4867	-0.065178
15.5627	171.209	12.1223	-0.892468	88.4844	-0.0651439
15.571	171.288	12.122	-0.892008	88.4819	-0.0651103
15.5793	171.374	12.1216	-0.891537	88.4794	-0.065076
15.5877	171.463	12.1213	-0.891054	88.477	-0.0650407
15.596	171.546	12.121	-0.890602	88.4749	-0.0650077
15.6043	171.626	12.1207	-0.890164	88.4725	-0.0649757
15.6127	171.709	12.1204	-0.889714	88.4701	-0.0649429
15.621	171.797	12.12	-0.889278	88.4678	-0.064911
15.6293	171.881	12.1197	-0.888838	88.4653	-0.0648789
15.6377	171.966	12.1193	-0.888422	88.4627	-0.0648486
15.646	172.052	12.119	-0.888037	88.4602	-0.0648205
15.6543	172.135	12.1187	-0.887649	88.458	-0.0647922
15.6627	172.216	12.1184	-0.887255	88.4559	-0.0647634
15.671	172.3	12.1181	-0.886836	88.4538	-0.0647328
15.6793	172.39	12.1178	-0.886409	88.4513	-0.0647016
15.6877	172.467	12.1175	-0.885983	88.4492	-0.0646705
15.696	172.55	12.1172	-0.88557	88.447	-0.0646404
15.7043	172.636	12.1169	-0.885145	88.4447	-0.0646094
15.7127	172.722	12.1166	-0.884711	88.4424	-0.0645777
15.721	172.797	12.1163	-0.884236	88.4404	-0.064543
15.7293	172.883	12.116	-0.883762	88.4382	-0.0645084
15.7377	172.97	12.1157	-0.883268	88.4361	-0.0644724
15.746	173.057	12.1154	-0.882799	88.4338	-0.0644381
15.7543	173.135	12.1151	-0.88237	88.4315	-0.0644068
15.7627	173.222	12.1147	-0.881924	88.4291	-0.0643743
15.771	173.307	12.1144	-0.881517	88.4269	-0.0643446
15.7793	173.39	12.1141	-0.881086	88.4247	-0.0643131
15.7877	173.472	12.1138	-0.880636	88.4225	-0.0642802
15.796	173.557	12.1136	-0.880207	88.4205	-0.0642489
15.8043	173.642	12.1133	-0.879804	88.4182	-0.0642195
15.8127	173.721	12.1129	-0.879374	88.4159	-0.0641881
15.821	173.81	12.1126	-0.878967	88.4136	-0.0641584
15.8293	173.894	12.1123	-0.878536	88.4113	-0.0641269
15.8377	173.977	12.112	-0.878107	88.4092	-0.0640956
15.846	174.063	12.1117	-0.877681	88.4072	-0.0640645
15.8543	174.14	12.1114	-0.877208	88.4048	-0.06403
15.8627	174.226	12.1111	-0.87676	88.4024	-0.0639973
15.871	174.317	12.1108	-0.87634	88.4002	-0.0639666
15.8793	174.397	12.1105	-0.875909	88.3978	-0.0639352
15.8877	174.479	12.1102	-0.87548	88.3957	-0.0639039
15.896	174.565	12.1099	-0.875081	88.3935	-0.0638747
15.9043	174.649	12.1096	-0.874681	88.3913	-0.0638456
15.9127	174.732	12.1092	-0.874315	88.389	-0.0638188
15.921	174.818	12.1089	-0.873907	88.3867	-0.0637891
15.9293	174.899	12.1087	-0.873494	88.3846	-0.0637589
15.9377	174.983	12.1084	-0.873122	88.3827	-0.0637318
15.946	175.065	12.1081	-0.872712	88.3806	-0.0637018
15.9543	175.149	12.1078	-0.872296	88.3785	-0.0636715
15.9627	175.236	12.1075	-0.871864	88.3765	-0.0636399
15.971	175.321	12.1072	-0.871455	88.3743	-0.0636101
15.9793	175.407	12.1069	-0.871034	88.3721	-0.0635794
15.9877	175.489	12.1067	-0.870609	88.3702	-0.0635483
15.996	175.571	12.1064	-0.870158	88.3683	-0.0635154
16.0043	175.653	12.1061	-0.86975	88.366	-0.0634856
16.0127	175.738	12.1058	-0.869342	88.3637	-0.0634559
16.021	175.822	12.1054	-0.868905	88.3612	-0.063424
16.0293	175.905	12.1051	-0.868518	88.3587	-0.0633957
16.0377	175.988	12.1048	-0.868139	88.3565	-0.063368
16.046	176.073	12.1045	-0.867754	88.3543	-0.06334
16.0543	176.155	12.1042	-0.867354	88.3521	-0.0633107
16.0627	176.239	12.1039	-0.866959	88.3499	-0.0632819
16.071	176.325	12.1036	-0.866545	88.3475	-0.0632517
16.0793	176.408	12.1032	-0.866139	88.3451	-0.063222
16.0877	176.493	12.1029	-0.865733	88.343	-0.0631924
16.096	176.577	12.1027	-0.865333	88.3411	-0.0631633
16.1043	176.664	12.1024	-0.864919	88.3389	-0.063133
16.1127	176.743	12.1021	-0.864501	88.337	-0.0631025
16.121	176.832	12.1018	-0.864101	88.3348	-0.0630733
16.1293	176.915	12.1015	-0.86368	88.3326	-0.0630425
16.1377	176.997	12.1012	-0.863258	88.3305	-0.0630118
16.146	177.083	12.101	-0.862835	88.3285	-0.0629809
16.1543	177.165	12.1007	-0.862446	88.3265	-0.0629525
16.1627	177.251	12.1004	-0.862054	88.3246	-0.0629239
16.171	177.336	12.1001	-0.861666	88.3224	-0.0628956
16.1793	177.418	12.0998	-0.86126	88.3202	-0.0628659
16.1877	177.501	12.0995	-0.860887	88.3181	-0.0628387
16.196	177.582	12.0992	-0.860477	88.316	-0.0628087
16.2043	177.662	12.099	-0.860044	88.314	-0.0627772
16.2127	177.752	12.0987	-0.859676	88.312	-0.0627503
16.221	177.836	12.0984	-0.859291	88.3098	-0.0627222
16.2293	177.918	12.0981	-0.858895	88.3075	-0.0626933
16.2377	178	12.0978	-0.858498	88.3052	-0.0626643
16.246	178.083	12.0975	-0.858086	88.303	-0.0626342
16.2543	178.169	12.0972	-0.857703	88.3009	-0.0626063
16.2627	178.255	12.0969	-0.857293	88.2989	-0.0625764
16.271	178.34	12.0966	-0.856889	88.2964	-0.0625469
16.2793	178.421	12.0962	-0.856519	88.2941	-0.0625199
16.2877	178.505	12.096	-0.856142	88.2919	-0.0624924
16.296	178.59	12.0957	-0.855729	88.2898	-0.0624622
16.3043	178.669	12.0954	-0.855328	88.2877	-0.0624329
16.3127	178.76	12.0951	-0.854945	88.2855	-0.062405
16.321	178.842	12.0948	-0.854573	88.2835	-0.0623778
16.3293	178.925	12.0945	-0.854193	88.2813	-0.0623501
16.3377	179.013	12.0942	-0.853759	88.2792	-0.0623184
16.346	179.094	12.0939	-0.853397	88.2772	-0.062292
16.3543	179.178	12.0937	-0.853021	88.2755	-0.0622645
16.3627	179.261	12.0934	-0.852653	88.2735	-0.0622377
16.371	179.347	12.0931	-0.852259	88.2713	-0.0622089
16.3793	179.428	12.0928	-0.851892	88.2692	-0.0621821
16.3877	179.51	12.0926	-0.851541	88.2672	-0.0621565
16.396	179.597	12.0923	-0.851179	88.2653	-0.0621301
16.4043	179.678	12.092	-0.850798	88.2633	-0.0621023
16.4127	179.762	12.0918	-0.850444	88.2613	-0.0620764
16.421	179.845	12.0915	-0.850119	88.2594	-0.0620527
16.4293	179.928	12.0912	-0.84975	88.2571	-0.0620258
16.4377	180.016	12.0909	-0.849383	88.2548	-0.061999
16.446	180.099	12.0906	-0.849005	88.2527	-0.0619714
16.4543	180.183	12.0903	-0.848665	88.2508	-0.0619466
16.4627	180.267	12.09	-0.848328	88.2485	-0.061922
16.471	180.355	12.0897	-0.847969	88.2465	-0.0618958
16.4793	180.431	12.0894	-0.847625	88.2443	-0.0618706
16.4877	180.516	12.0891	-0.847245	88.2422	-0.0618429
16.496	180.602	12.0888	-0.846862	88.24	-0.061815
16.5043	180.686	12.0885	-0.846492	88.2378	-0.061788
16.5127	180.767	12.0882	-0.846164	88.2357	-0.061764
16.521	180.851	12.088	-0.845834	88.2338	-0.06174
16.5293	180.938	12.0877	-0.845473	88.2317	-0.0617136
16.5377	181.02	12.0874	-0.845079	88.2296	-0.0616848
16.546	181.1	12.0871	-0.844682	88.2275	-0.0616559
16.5543	181.186	12.0868	-0.844306	88.2253	-0.0616284
16.5627	181.271	12.0865	-0.843918	88.223	-0.0616001
16.571	181.353	12.0862	-0.843565	88.2209	-0.0615743
16.5793	181.445	12.0859	-0.843212	88.2188	-0.0615486
16.5877	181.523	12.0856	-0.842816	88.2167	-0.0615197
16.596	181.61	12.0854	-0.842408	88.2147	-0.0614899
16.6043	181.688	12.0851	-0.841989	88.2126	-0.0614593
16.6127	181.78	12.0848	-0.841628	88.2105	-0.0614329
16.621	181.859	12.0845	-0.841309	88.2085	-0.0614096
16.6293	181.943	12.0843	-0.840966	88.2065	-0.0613846
16.6377	182.025	12.084	-0.840631	88.2047	-0.0613601
16.646	182.111	12.0837	-0.840285	88.2027	-0.0613349
[truncated: 9,857 more rows]
