# Supplementary material for: Comparative study on mechanisms for improving mechanical properties and microstructure of cement paste modified by different types of nanomaterials
Source: publisher site journal article supplement (doi:10.1515/ntrev-2021-0027), 2021-01-01
Supplement: Supplementary file 18 [file NT-2-7d.xlsx]

## Sheet: Sheet1
Time (min)	Temperature (°C)	Weight (mg)			Temperature Difference (°C/mg)
0.00113333	23.5543	13.0071	-0.663875	100	-0.0510393
0.00433333	23.5978	13.007	-0.664727	99.9992	-0.0511048
0.0126667	23.6337	13.0068	-0.664805	99.9975	-0.0511108
0.021	23.6775	13.0065	-0.664887	99.9953	-0.0511171
0.0293333	23.7102	13.0062	-0.66502	99.9929	-0.0511273
0.0376667	23.7506	13.0059	-0.665202	99.9904	-0.0511414
0.046	23.7974	13.0055	-0.665422	99.9873	-0.0511583
0.0543333	23.8381	13.0051	-0.665652	99.9841	-0.051176
0.0626667	23.8773	13.0046	-0.665967	99.9808	-0.0512002
0.071	23.9177	13.0043	-0.666306	99.9779	-0.0512262
0.0793333	23.9522	13.0038	-0.666703	99.9747	-0.0512568
0.0876667	23.9963	13.0034	-0.667147	99.9711	-0.0512909
0.096	24.031	13.0029	-0.667572	99.9674	-0.0513236
0.104333	24.0669	13.0024	-0.668064	99.9636	-0.0513614
0.112667	24.1091	13.0019	-0.668583	99.9596	-0.0514013
0.121	24.15	13.0014	-0.669069	99.9559	-0.0514386
0.129333	24.1875	13.0009	-0.669586	99.9525	-0.0514784
0.137667	24.2295	13.0005	-0.670184	99.9492	-0.0515244
0.146	24.2673	13.0001	-0.67079	99.9459	-0.0515709
0.154333	24.3026	12.9996	-0.671438	99.9421	-0.0516207
0.162667	24.3467	12.9991	-0.672077	99.9383	-0.0516699
0.171	24.3818	12.9986	-0.672689	99.9344	-0.051717
0.179333	24.417	12.9981	-0.673344	99.9304	-0.0517673
0.187667	24.4538	12.9976	-0.674029	99.9264	-0.0518199
0.196	24.4858	12.9971	-0.674733	99.9227	-0.0518741
0.204333	24.5282	12.9966	-0.67551	99.9188	-0.0519338
0.212667	24.5613	12.9961	-0.676255	99.9149	-0.0519911
0.221	24.5967	12.9955	-0.677066	99.9108	-0.0520535
0.229333	24.6312	12.995	-0.677862	99.9064	-0.0521146
0.237667	24.6661	12.9944	-0.678642	99.902	-0.0521746
0.246	24.6942	12.9938	-0.679471	99.8975	-0.0522383
0.254333	24.7311	12.9932	-0.68037	99.8932	-0.0523074
0.262667	24.7728	12.9927	-0.681292	99.8889	-0.0523784
0.271	24.8094	12.9921	-0.682187	99.8847	-0.0524472
0.279333	24.8432	12.9916	-0.683102	99.8803	-0.0525175
0.287667	24.8764	12.991	-0.684055	99.8758	-0.0525907
0.296	24.9205	12.9904	-0.685091	99.8711	-0.0526704
0.304333	24.942	12.9898	-0.686058	99.8664	-0.0527448
0.312667	24.979	12.9892	-0.687044	99.8618	-0.0528206
0.321	25.0177	12.9885	-0.688125	99.8571	-0.0529036
0.329333	25.0474	12.9879	-0.689236	99.8525	-0.0529891
0.337667	25.0828	12.9873	-0.69031	99.8478	-0.0530717
0.346	25.116	12.9867	-0.691412	99.843	-0.0531564
0.354333	25.1444	12.9861	-0.692541	99.8382	-0.0532432
0.362667	25.1819	12.9855	-0.693693	99.8333	-0.0533318
0.371	25.2143	12.9848	-0.694895	99.8285	-0.0534242
0.379333	25.2504	12.9842	-0.696058	99.8237	-0.0535135
0.387667	25.2799	12.9836	-0.697282	99.8189	-0.0536077
0.396	25.313	12.9829	-0.698546	99.8139	-0.0537049
0.404333	25.3484	12.9823	-0.699787	99.8091	-0.0538003
0.412667	25.3883	12.9816	-0.701022	99.804	-0.0538952
0.421	25.4193	12.981	-0.702302	99.799	-0.0539936
0.429333	25.4488	12.9803	-0.703631	99.794	-0.0540958
0.437667	25.4751	12.9797	-0.704967	99.789	-0.0541985
0.446	25.5107	12.979	-0.706311	99.7839	-0.0543019
0.454333	25.5479	12.9784	-0.707635	99.7787	-0.0544036
0.462667	25.5825	12.9777	-0.709031	99.7738	-0.0545109
0.471	25.6159	12.9771	-0.710449	99.7688	-0.05462
0.479333	25.6483	12.9764	-0.711837	99.7637	-0.0547267
0.487667	25.6824	12.9757	-0.713271	99.7587	-0.054837
0.496	25.7125	12.9751	-0.714748	99.7536	-0.0549505
0.504333	25.7513	12.9744	-0.716215	99.7486	-0.0550633
0.512667	25.781	12.9738	-0.717683	99.7434	-0.0551761
0.521	25.8143	12.9731	-0.71922	99.7381	-0.0552943
0.529333	25.8573	12.9724	-0.720768	99.7331	-0.0554133
0.537667	25.8795	12.9718	-0.722337	99.728	-0.0555339
0.546	25.9136	12.9711	-0.723874	99.7228	-0.0556521
0.554333	25.9551	12.9704	-0.725401	99.7177	-0.0557695
0.562667	25.9853	12.9697	-0.727012	99.7125	-0.0558933
0.571	26.0271	12.969	-0.728596	99.7072	-0.0560152
0.579333	26.0597	12.9683	-0.730139	99.7017	-0.0561338
0.587667	26.0959	12.9676	-0.731747	99.6964	-0.0562574
0.596	26.1294	12.967	-0.733338	99.6911	-0.0563797
0.604333	26.1668	12.9663	-0.734942	99.6857	-0.056503
0.612667	26.1995	12.9655	-0.73653	99.6803	-0.0566251
0.621	26.2351	12.9648	-0.738118	99.6749	-0.0567472
0.629333	26.2784	12.9641	-0.739759	99.6692	-0.0568733
0.637667	26.3035	12.9634	-0.741417	99.6637	-0.0570008
0.646	26.3473	12.9627	-0.743055	99.6582	-0.0571268
0.654333	26.3841	12.9619	-0.744732	99.6524	-0.0572557
0.662667	26.42	12.9612	-0.746418	99.6467	-0.0573853
0.671	26.4569	12.9604	-0.748077	99.6411	-0.0575128
0.679333	26.5005	12.9597	-0.74976	99.6355	-0.0576422
0.687667	26.5372	12.959	-0.751462	99.6298	-0.0577731
0.696	26.5781	12.9583	-0.753206	99.6243	-0.0579071
0.704333	26.6162	12.9575	-0.754985	99.6184	-0.058044
0.712667	26.6599	12.9567	-0.756741	99.6124	-0.058179
0.721	26.7002	12.9559	-0.758477	99.6065	-0.0583124
0.729333	26.7395	12.9552	-0.76018	99.6007	-0.0584433
0.737667	26.7724	12.9545	-0.761926	99.5951	-0.0585776
0.746	26.811	12.9537	-0.763724	99.5896	-0.0587158
0.754333	26.8549	12.953	-0.765573	99.5838	-0.0588579
0.762667	26.8931	12.9522	-0.767377	99.5778	-0.0589966
0.771	26.9316	12.9514	-0.769156	99.5717	-0.0591334
0.779333	26.9728	12.9507	-0.770864	99.5659	-0.0592647
0.787667	27.0138	12.9499	-0.772638	99.5601	-0.0594011
0.796	27.0574	12.9491	-0.774448	99.5542	-0.0595403
0.804333	27.0996	12.9484	-0.776263	99.5484	-0.0596798
0.812667	27.1436	12.9476	-0.778135	99.5424	-0.0598238
0.821	27.1868	12.9468	-0.779967	99.5363	-0.0599646
0.829333	27.2333	12.946	-0.781783	99.5303	-0.0601042
0.837667	27.2752	12.9452	-0.783595	99.5242	-0.0602435
0.846	27.3217	12.9445	-0.785439	99.5182	-0.0603853
0.854333	27.3612	12.9437	-0.787288	99.5126	-0.0605274
0.862667	27.4099	12.9429	-0.789231	99.5064	-0.0606768
0.871	27.4539	12.9421	-0.791084	99.5004	-0.0608192
0.879333	27.4959	12.9414	-0.792918	99.4946	-0.0609602
0.887667	27.5413	12.9406	-0.794785	99.4884	-0.0611038
0.896	27.5903	12.9398	-0.79665	99.4825	-0.0612472
0.904333	27.6389	12.939	-0.798544	99.4766	-0.0613928
0.912667	27.6824	12.9383	-0.800473	99.4704	-0.0615411
0.921	27.7291	12.9375	-0.802415	99.4644	-0.0616904
0.929333	27.7771	12.9367	-0.804315	99.4584	-0.0618365
0.937667	27.8253	12.9359	-0.806261	99.4521	-0.0619861
0.946	27.8797	12.9351	-0.808205	99.4461	-0.0621356
0.954333	27.9231	12.9343	-0.810099	99.4401	-0.0622811
0.962667	27.9741	12.9335	-0.812038	99.4341	-0.0624302
0.971	28.028	12.9328	-0.814013	99.4282	-0.0625821
0.979333	28.0778	12.9319	-0.815989	99.4217	-0.062734
0.987667	28.1257	12.9311	-0.81795	99.4155	-0.0628847
0.996	28.1717	12.9303	-0.819919	99.4093	-0.0630361
1.00433	28.2251	12.9295	-0.821874	99.4029	-0.0631864
1.01267	28.2763	12.9287	-0.823892	99.3967	-0.0633416
1.021	28.3315	12.9278	-0.825893	99.3902	-0.0634954
1.02933	28.3848	12.927	-0.827854	99.3839	-0.0636462
1.03767	28.4346	12.9262	-0.829901	99.3775	-0.0638035
1.046	28.4896	12.9253	-0.831886	99.371	-0.0639562
1.05433	28.5422	12.9245	-0.833824	99.3645	-0.0641051
1.06267	28.6007	12.9237	-0.835845	99.3583	-0.0642605
1.071	28.6565	12.9228	-0.837872	99.352	-0.0644164
1.07933	28.7089	12.922	-0.83988	99.3454	-0.0645707
1.08767	28.7672	12.9212	-0.841913	99.3391	-0.0647271
1.096	28.8214	12.9203	-0.843956	99.3328	-0.0648841
1.10433	28.8769	12.9195	-0.845964	99.3264	-0.0650385
1.11267	28.9303	12.9186	-0.848021	99.3198	-0.0651966
1.121	28.993	12.9178	-0.850083	99.3129	-0.0653552
1.12933	29.0499	12.9169	-0.852178	99.3061	-0.0655162
1.13767	29.1034	12.916	-0.854285	99.2994	-0.0656782
1.146	29.1612	12.9151	-0.856329	99.2928	-0.0658353
1.15433	29.2186	12.9143	-0.85839	99.286	-0.0659938
1.16267	29.2794	12.9134	-0.860467	99.2795	-0.0661535
1.171	29.3346	12.9125	-0.86253	99.2728	-0.0663121
1.17933	29.4009	12.9116	-0.864628	99.2659	-0.0664734
1.18767	29.461	12.9108	-0.866729	99.2592	-0.0666349
1.196	29.5255	12.9099	-0.868865	99.2526	-0.0667991
1.20433	29.585	12.9091	-0.870964	99.246	-0.0669605
1.21267	29.6408	12.9082	-0.873107	99.2393	-0.0671253
1.221	29.7011	12.9073	-0.875252	99.2327	-0.0672902
1.22933	29.7628	12.9065	-0.877454	99.226	-0.0674595
1.23767	29.8247	12.9055	-0.879629	99.219	-0.0676267
1.246	29.8841	12.9046	-0.881795	99.2119	-0.0677932
1.25433	29.9496	12.9037	-0.883986	99.205	-0.0679616
1.26267	30.0139	12.9028	-0.886139	99.1981	-0.0681272
1.271	30.0756	12.9019	-0.888331	99.1913	-0.0682957
1.27933	30.1416	12.901	-0.890463	99.1842	-0.0684596
1.28767	30.2087	12.9001	-0.892634	99.1775	-0.0686266
1.296	30.2777	12.8992	-0.894797	99.1705	-0.0687928
1.30433	30.3394	12.8983	-0.897022	99.1633	-0.0689639
1.31267	30.4038	12.8974	-0.89916	99.1563	-0.0691282
1.321	30.4748	12.8965	-0.901344	99.1495	-0.0692961
1.32933	30.5408	12.8956	-0.903541	99.1425	-0.069465
1.33767	30.6059	12.8947	-0.905739	99.1356	-0.069634
1.346	30.6764	12.8938	-0.907933	99.1285	-0.0698027
1.35433	30.7358	12.8928	-0.910153	99.1213	-0.0699734
1.36267	30.8055	12.8919	-0.91237	99.1143	-0.0701439
1.371	30.8756	12.891	-0.914581	99.1073	-0.0703138
1.37933	30.9437	12.8901	-0.916832	99.1003	-0.0704868
1.38767	31.0159	12.8892	-0.91906	99.0931	-0.0706582
1.396	31.0866	12.8882	-0.921321	99.0859	-0.070832
1.40433	31.1488	12.8873	-0.923562	99.0786	-0.0710043
1.41267	31.2227	12.8863	-0.925808	99.0714	-0.071177
1.421	31.2958	12.8854	-0.928077	99.0641	-0.0713514
1.42933	31.3685	12.8845	-0.930375	99.0569	-0.0715281
1.43767	31.4327	12.8835	-0.932654	99.0496	-0.0717033
1.446	31.5072	12.8825	-0.934982	99.042	-0.0718822
1.45433	31.583	12.8815	-0.937299	99.0344	-0.0720604
1.46267	31.6526	12.8805	-0.939627	99.0268	-0.0722394
1.471	31.7186	12.8796	-0.941949	99.0192	-0.0724179
1.47933	31.7983	12.8786	-0.944233	99.0118	-0.0725935
1.48767	31.8744	12.8776	-0.946538	99.0043	-0.0727707
1.496	31.9407	12.8766	-0.948896	98.9967	-0.072952
1.50433	32.0158	12.8757	-0.951211	98.9892	-0.07313
1.51267	32.0866	12.8747	-0.953527	98.9815	-0.073308
1.521	32.1692	12.8736	-0.955827	98.9737	-0.0734848
1.52933	32.2363	12.8727	-0.958094	98.9662	-0.0736592
1.53767	32.3136	12.8717	-0.960394	98.9586	-0.073836
1.546	32.3892	12.8707	-0.962678	98.951	-0.0740116
1.55433	32.4629	12.8697	-0.964989	98.9432	-0.0741892
1.56267	32.5398	12.8686	-0.96738	98.9352	-0.0743731
1.571	32.6162	12.8676	-0.969764	98.9273	-0.0745563
1.57933	32.6956	12.8666	-0.972106	98.9193	-0.0747364
1.58767	32.776	12.8655	-0.974465	98.9114	-0.0749177
1.596	32.8537	12.8645	-0.976836	98.9034	-0.0751001
1.60433	32.9215	12.8634	-0.979287	98.8953	-0.0752885
1.61267	33.0052	12.8624	-0.98177	98.8875	-0.0754794
1.621	33.0816	12.8614	-0.984222	98.8795	-0.0756679
1.62933	33.1574	12.8603	-0.986679	98.8714	-0.0758568
1.63767	33.239	12.8593	-0.989096	98.8635	-0.0760426
1.646	33.3136	12.8583	-0.991552	98.8556	-0.0762314
1.65433	33.3946	12.8573	-0.993983	98.8477	-0.0764183
1.66267	33.4732	12.8562	-0.996448	98.8398	-0.0766078
1.671	33.5522	12.8552	-0.998948	98.8317	-0.0768001
1.67933	33.6377	12.8541	-1.0014	98.8235	-0.0769889
1.68767	33.7126	12.853	-1.00379	98.8153	-0.0771721
1.696	33.8006	12.8519	-1.00621	98.8069	-0.0773582
1.70433	33.8736	12.8509	-1.00871	98.7986	-0.0775505
1.71267	33.9491	12.8498	-1.01118	98.7904	-0.0777407
1.721	34.0367	12.8487	-1.01367	98.782	-0.077932
1.72933	34.1154	12.8476	-1.01615	98.7737	-0.0781223
1.73767	34.1938	12.8465	-1.01867	98.765	-0.0783164
1.746	34.2709	12.8454	-1.02119	98.7565	-0.0785097
1.75433	34.3561	12.8443	-1.0237	98.7481	-0.0787027
1.76267	34.4403	12.8432	-1.02628	98.7397	-0.078901
1.771	34.5197	12.8421	-1.02888	98.7314	-0.0791012
1.77933	34.6052	12.841	-1.03147	98.7229	-0.0793
1.78767	34.6821	12.8399	-1.034	98.7144	-0.0794946
1.796	34.7685	12.8388	-1.03655	98.7056	-0.0796912
1.80433	34.8546	12.8376	-1.03915	98.6967	-0.0798905
1.81267	34.9256	12.8365	-1.0417	98.688	-0.0800867
1.821	35.0144	12.8354	-1.04425	98.6795	-0.080283
1.82933	35.0998	12.8342	-1.04683	98.6708	-0.0804816
1.83767	35.1788	12.8331	-1.04941	98.6619	-0.0806794
1.846	35.2594	12.8319	-1.05197	98.6528	-0.0808766
1.85433	35.3477	12.8308	-1.05456	98.6441	-0.0810758
1.86267	35.4325	12.8296	-1.05718	98.6353	-0.0812767
1.871	35.5137	12.8285	-1.05979	98.6265	-0.0814779
1.87933	35.5991	12.8273	-1.06246	98.6177	-0.0816829
1.88767	35.6854	12.8262	-1.06507	98.6088	-0.0818839
1.896	35.7666	12.825	-1.06773	98.5999	-0.0820884
1.90433	35.8567	12.8238	-1.07037	98.5908	-0.0822909
1.91267	35.9339	12.8226	-1.07299	98.5816	-0.0824925
1.921	36.0252	12.8214	-1.07563	98.5724	-0.0826956
1.92933	36.1082	12.8203	-1.07827	98.5633	-0.082898
1.93767	36.1964	12.819	-1.08088	98.5538	-0.083099
1.946	36.2781	12.8178	-1.08349	98.5444	-0.0832996
1.95433	36.3647	12.8165	-1.08613	98.5347	-0.0835027
1.96267	36.4481	12.8153	-1.08874	98.5251	-0.0837034
1.971	36.5356	12.8141	-1.09142	98.5158	-0.0839092
1.97933	36.6182	12.8129	-1.09407	98.5064	-0.084113
1.98767	36.7052	12.8116	-1.09677	98.497	-0.0843204
1.996	36.788	12.8104	-1.09947	98.4874	-0.0845279
2.00433	36.8747	12.8092	-1.10214	98.478	-0.0847336
2.01267	36.9623	12.8079	-1.10482	98.4684	-0.0849399
2.021	37.0533	12.8067	-1.10756	98.4591	-0.0851506
2.02933	37.1309	12.8055	-1.11032	98.4495	-0.0853626
2.03767	37.2195	12.8043	-1.11309	98.4403	-0.0855752
2.046	37.3083	12.8031	-1.11582	98.431	-0.0857853
2.05433	37.398	12.8018	-1.11856	98.4214	-0.0859956
2.06267	37.4832	12.8005	-1.12127	98.4117	-0.0862043
2.071	37.5695	12.7993	-1.12401	98.402	-0.0864146
2.07933	37.6549	12.798	-1.12673	98.3922	-0.0866243
2.08767	37.739	12.7967	-1.12952	98.3824	-0.0868388
2.096	37.8322	12.7955	-1.13232	98.3726	-0.087054
2.10433	37.9121	12.7942	-1.13511	98.3627	-0.0872686
2.11267	38.0066	12.7929	-1.13789	98.3527	-0.0874823
2.121	38.0854	12.7916	-1.14067	98.3428	-0.0876955
2.12933	38.1723	12.7903	-1.14345	98.3328	-0.0879098
2.13767	38.2667	12.789	-1.14626	98.3227	-0.0881258
2.146	38.3483	12.7876	-1.14913	98.3125	-0.0883463
2.15433	38.4375	12.7863	-1.15197	98.3024	-0.0885648
2.16267	38.5256	12.785	-1.15484	98.2923	-0.0887852
2.171	38.6124	12.7837	-1.15769	98.2822	-0.0890042
2.17933	38.6973	12.7824	-1.16057	98.2719	-0.0892254
2.18767	38.7892	12.781	-1.16343	98.2616	-0.0894459
2.196	38.8754	12.7797	-1.16627	98.2513	-0.0896641
2.20433	38.9613	12.7783	-1.16908	98.2408	-0.0898799
2.21267	39.0498	12.777	-1.17192	98.2304	-0.0900986
2.221	39.1301	12.7756	-1.17476	98.2201	-0.0903166
2.22933	39.2238	12.7743	-1.1776	98.2098	-0.090535
2.23767	39.3077	12.7729	-1.18043	98.1993	-0.0907524
2.246	39.4024	12.7715	-1.18322	98.1888	-0.0909671
2.25433	39.4873	12.7702	-1.18606	98.1785	-0.0911855
2.26267	39.5755	12.7688	-1.18894	98.1678	-0.0914066
2.271	39.6625	12.7674	-1.19179	98.1572	-0.0916257
2.27933	39.7503	12.766	-1.19467	98.1463	-0.091847
2.28767	39.8375	12.7646	-1.1976	98.1356	-0.0920728
2.296	39.9258	12.7632	-1.20053	98.1248	-0.0922977
2.30433	40.0133	12.7618	-1.20343	98.1139	-0.0925209
2.31267	40.0998	12.7604	-1.20636	98.1027	-0.0927463
2.321	40.1918	12.7589	-1.20933	98.0918	-0.0929745
2.32933	40.2785	12.7575	-1.21238	98.0811	-0.0932086
2.33767	40.3662	12.7561	-1.21534	98.07	-0.0934365
2.346	40.4507	12.7547	-1.21826	98.0591	-0.0936606
2.35433	40.534	12.7532	-1.22123	98.0481	-0.0938889
2.36267	40.6211	12.7518	-1.22423	98.037	-0.0941201
2.371	40.7084	12.7504	-1.22723	98.026	-0.0943509
2.37933	40.7985	12.7489	-1.23023	98.015	-0.0945815
2.38767	40.8857	12.7475	-1.23325	98.0039	-0.0948132
2.396	40.9665	12.7461	-1.23622	97.9932	-0.0950416
2.40433	41.0606	12.7447	-1.23921	97.982	-0.0952716
2.41267	41.1481	12.7432	-1.24223	97.9707	-0.0955035
2.421	41.2332	12.7417	-1.2452	97.9591	-0.095732
2.42933	41.3182	12.7402	-1.24818	97.9478	-0.0959615
2.43767	41.4116	12.7387	-1.2512	97.9367	-0.0961934
2.446	41.4965	12.7373	-1.2542	97.9256	-0.0964241
2.45433	41.5901	12.7358	-1.2572	97.9143	-0.0966547
2.46267	41.6778	12.7344	-1.26018	97.9029	-0.0968839
2.471	41.7657	12.7329	-1.26317	97.8915	-0.0971137
2.47933	41.8519	12.7314	-1.26619	97.8799	-0.097346
2.48767	41.9437	12.7299	-1.26919	97.8683	-0.0975768
2.496	42.0253	12.7284	-1.27211	97.8568	-0.0978011
2.50433	42.1159	12.7269	-1.27519	97.8455	-0.0980376
2.51267	42.1996	12.7254	-1.27825	97.834	-0.0982732
2.521	42.2851	12.7239	-1.28122	97.8225	-0.0985011
2.52933	42.3745	12.7224	-1.28419	97.8109	-0.0987298
2.53767	42.4598	12.7209	-1.28718	97.7993	-0.0989599
2.546	42.5517	12.7194	-1.29022	97.7875	-0.0991931
2.55433	42.6325	12.7178	-1.29326	97.7758	-0.099427
2.56267	42.7147	12.7163	-1.29626	97.7641	-0.0996574
2.571	42.8034	12.7148	-1.29926	97.7525	-0.0998885
2.57933	42.8917	12.7133	-1.3023	97.7409	-0.100122
2.58767	42.9757	12.7117	-1.30526	97.7289	-0.100349
2.596	43.0694	12.7102	-1.30824	97.7172	-0.100578
2.60433	43.151	12.7086	-1.31127	97.7051	-0.100812
2.61267	43.2423	12.7071	-1.31429	97.6933	-0.101044
2.621	43.325	12.7056	-1.31726	97.6815	-0.101272
2.62933	43.4128	12.704	-1.32022	97.6696	-0.1015
2.63767	43.499	12.7025	-1.32318	97.6579	-0.101727
2.646	43.5865	12.701	-1.32615	97.6461	-0.101956
2.65433	43.6711	12.6994	-1.3291	97.6341	-0.102183
2.66267	43.7577	12.6978	-1.33207	97.6219	-0.102411
2.671	43.8395	12.6963	-1.33507	97.61	-0.102641
2.67933	43.9243	12.6947	-1.33803	97.598	-0.102869
2.68767	44.0098	12.6931	-1.34097	97.5859	-0.103095
2.696	44.1027	12.6915	-1.34394	97.5736	-0.103323
2.70433	44.1851	12.6899	-1.34692	97.5615	-0.103553
2.71267	44.2685	12.6884	-1.34989	97.5493	-0.103781
2.721	44.3521	12.6868	-1.35284	97.537	-0.104007
2.72933	44.4356	12.6852	-1.35579	97.5247	-0.104235
2.73767	44.5261	12.6836	-1.35871	97.5124	-0.104459
2.746	44.6035	12.682	-1.36161	97.5001	-0.104682
2.75433	44.6899	12.6803	-1.3645	97.4876	-0.104904
2.76267	44.7784	12.6787	-1.36741	97.4752	-0.105128
2.771	44.8684	12.6771	-1.37031	97.4629	-0.105351
2.77933	44.9514	12.6755	-1.3732	97.4507	-0.105573
2.78767	45.0337	12.6739	-1.37606	97.4383	-0.105793
2.796	45.1197	12.6723	-1.37893	97.4259	-0.106013
2.80433	45.2042	12.6707	-1.38178	97.4133	-0.106233
2.81267	45.2901	12.6691	-1.38465	97.4008	-0.106453
2.821	45.3721	12.6674	-1.38754	97.3884	-0.106675
2.82933	45.4573	12.6658	-1.3904	97.3761	-0.106896
2.83767	45.5413	12.6642	-1.39323	97.3639	-0.107113
2.846	45.6307	12.6626	-1.39603	97.3515	-0.107328
2.85433	45.7115	12.661	-1.3988	97.339	-0.107541
2.86267	45.7912	12.6594	-1.40157	97.3266	-0.107754
2.871	45.8809	12.6578	-1.40434	97.3142	-0.107967
2.87933	45.9634	12.6562	-1.40713	97.3017	-0.108181
2.88767	46.0487	12.6545	-1.40991	97.2893	-0.108395
2.896	46.1341	12.6529	-1.41261	97.2767	-0.108602
2.90433	46.2155	12.6513	-1.41531	97.2642	-0.10881
2.91267	46.2983	12.6496	-1.41801	97.2517	-0.109018
2.921	46.3813	12.648	-1.42073	97.2391	-0.109227
2.92933	46.4678	12.6464	-1.42342	97.2265	-0.109434
2.93767	46.5538	12.6447	-1.42613	97.2139	-0.109642
2.946	46.6388	12.6431	-1.4288	97.2012	-0.109847
2.95433	46.7286	12.6414	-1.43144	97.1885	-0.110051
2.96267	46.8122	12.6398	-1.43405	97.1758	-0.110251
2.971	46.8929	12.6381	-1.43664	97.163	-0.11045
2.97933	46.9784	12.6365	-1.43924	97.1506	-0.11065
2.98767	47.0588	12.6349	-1.44178	97.1382	-0.110845
2.996	47.1367	12.6333	-1.44433	97.1256	-0.111041
3.00433	47.2226	12.6316	-1.44685	97.1129	-0.111235
3.01267	47.3104	12.63	-1.44937	97.1003	-0.111429
3.021	47.3867	12.6283	-1.45191	97.0877	-0.111624
3.02933	47.4708	12.6267	-1.45443	97.075	-0.111818
3.03767	47.5628	12.625	-1.45688	97.0625	-0.112006
3.046	47.6455	12.6234	-1.45928	97.0499	-0.112191
3.05433	47.7246	12.6218	-1.46171	97.0376	-0.112378
3.06267	47.805	12.6202	-1.4641	97.0249	-0.112561
3.071	47.8855	12.6185	-1.4665	97.0123	-0.112746
3.07933	47.9718	12.6169	-1.46887	96.9999	-0.112928
3.08767	48.0567	12.6153	-1.47121	96.9875	-0.113108
3.096	48.1424	12.6137	-1.47355	96.9751	-0.113288
3.10433	48.2173	12.6121	-1.47579	96.9629	-0.11346
3.11267	48.306	12.6105	-1.478	96.9505	-0.11363
3.121	48.386	12.6089	-1.48025	96.9382	-0.113803
3.12933	48.4649	12.6073	-1.48252	96.9259	-0.113977
3.13767	48.5516	12.6057	-1.48474	96.9136	-0.114148
3.146	48.6315	12.6041	-1.48694	96.9014	-0.114318
3.15433	48.7141	12.6025	-1.48912	96.8889	-0.114485
3.16267	48.7976	12.6008	-1.49125	96.8765	-0.114649
3.171	48.881	12.5992	-1.49336	96.8642	-0.114811
3.17933	48.9656	12.5976	-1.49543	96.8518	-0.11497
3.18767	49.0476	12.596	-1.4975	96.8393	-0.115129
3.196	49.126	12.5944	-1.49957	96.827	-0.115288
3.20433	49.2085	12.5928	-1.5016	96.8149	-0.115444
3.21267	49.2927	12.5913	-1.50363	96.8028	-0.1156
3.221	49.3739	12.5897	-1.50557	96.7905	-0.115749
3.22933	49.4576	12.5881	-1.5075	96.7783	-0.115898
3.23767	49.5328	12.5865	-1.50935	96.766	-0.116041
3.246	49.6185	12.5849	-1.51122	96.7538	-0.116184
3.25433	49.6952	12.5833	-1.51307	96.7415	-0.116326
3.26267	49.7759	12.5817	-1.51489	96.7293	-0.116466
3.271	49.8576	12.5802	-1.51668	96.7174	-0.116604
3.27933	49.9372	12.5786	-1.51844	96.7051	-0.116739
3.28767	50.0155	12.5769	-1.52017	96.6927	-0.116872
3.296	50.104	12.5753	-1.52183	96.6803	-0.116999
3.30433	50.1833	12.5737	-1.5235	96.6681	-0.117128
3.31267	50.263	12.5722	-1.52513	96.656	-0.117254
3.321	50.3405	12.5707	-1.52679	96.6443	-0.117381
3.32933	50.427	12.5691	-1.52839	96.6325	-0.117504
3.33767	50.5101	12.5676	-1.52998	96.6206	-0.117626
3.346	50.5919	12.566	-1.53149	96.6085	-0.117742
3.35433	50.6666	12.5644	-1.53298	96.5966	-0.117857
3.36267	50.7514	12.5629	-1.53445	96.5848	-0.11797
3.371	50.8316	12.5614	-1.53586	96.573	-0.118078
3.37933	50.9108	12.5599	-1.53729	96.5613	-0.118188
3.38767	50.9887	12.5583	-1.53869	96.5495	-0.118296
3.396	51.0817	12.5568	-1.54007	96.5379	-0.118402
3.40433	51.153	12.5553	-1.54143	96.526	-0.118507
3.41267	51.241	12.5537	-1.54277	96.5141	-0.118609
3.421	51.317	12.5522	-1.54406	96.5025	-0.118709
3.42933	51.4004	12.5507	-1.54534	96.4909	-0.118807
3.43767	51.4782	12.5492	-1.5466	96.4794	-0.118904
3.446	51.5589	12.5477	-1.5478	96.4678	-0.118996
3.45433	51.6373	12.5462	-1.54902	96.4563	-0.11909
3.46267	51.7156	12.5447	-1.55019	96.4448	-0.11918
3.471	51.7959	12.5432	-1.55134	96.4333	-0.119269
3.47933	51.8739	12.5417	-1.55244	96.4214	-0.119353
3.48767	51.9569	12.5402	-1.55351	96.41	-0.119435
3.496	52.0401	12.5387	-1.55451	96.3985	-0.119512
3.50433	52.1204	12.5372	-1.55547	96.3869	-0.119586
3.51267	52.1975	12.5357	-1.55645	96.3756	-0.119661
3.521	52.2795	12.5342	-1.55743	96.3641	-0.119736
3.52933	52.3589	12.5327	-1.55837	96.3528	-0.119809
3.53767	52.44	12.5313	-1.55926	96.3415	-0.119878
3.546	52.5234	12.5298	-1.56015	96.3301	-0.119946
3.55433	52.607	12.5283	-1.56099	96.3188	-0.120011
3.56267	52.6858	12.5268	-1.56182	96.3075	-0.120074
3.571	52.7603	12.5254	-1.56264	96.2964	-0.120137
3.57933	52.841	12.5239	-1.56344	96.2853	-0.120199
3.58767	52.9148	12.5225	-1.56422	96.2742	-0.120259
3.596	53.0015	12.521	-1.56495	96.2627	-0.120315
3.60433	53.0824	12.5195	-1.56565	96.2514	-0.120369
3.61267	53.1624	12.5181	-1.56638	96.2401	-0.120424
3.621	53.2421	12.5167	-1.56705	96.2292	-0.120476
3.62933	53.3218	12.5152	-1.5677	96.2184	-0.120526
3.63767	53.3993	12.5138	-1.56832	96.2075	-0.120574
3.646	53.4828	12.5124	-1.56889	96.1966	-0.120618
3.65433	53.5634	12.511	-1.56943	96.1855	-0.12066
3.66267	53.6419	12.5096	-1.56998	96.1746	-0.120701
3.671	53.721	12.5081	-1.57049	96.1636	-0.120741
3.67933	53.7995	12.5067	-1.571	96.1529	-0.12078
3.68767	53.8835	12.5053	-1.57145	96.1421	-0.120815
3.696	53.9626	12.504	-1.57187	96.1316	-0.120847
3.70433	54.0444	12.5026	-1.57228	96.1209	-0.120878
3.71267	54.1224	12.5012	-1.57261	96.11	-0.120904
3.721	54.1992	12.4998	-1.57294	96.0993	-0.120929
3.72933	54.2844	12.4983	-1.57332	96.0884	-0.120958
3.73767	54.3629	12.497	-1.57363	96.0778	-0.120982
3.746	54.4403	12.4956	-1.57389	96.0671	-0.121002
3.75433	54.5202	12.4942	-1.57415	96.0564	-0.121022
3.76267	54.602	12.4928	-1.57436	96.0458	-0.121038
3.771	54.6823	12.4914	-1.57456	96.0353	-0.121053
3.77933	54.7634	12.4901	-1.57477	96.0246	-0.12107
3.78767	54.8349	12.4887	-1.57497	96.014	-0.121085
3.796	54.9206	12.4873	-1.57516	96.0037	-0.1211
3.80433	54.9982	12.486	-1.57531	95.9933	-0.121111
3.81267	55.0814	12.4846	-1.57543	95.9829	-0.121121
3.821	55.1597	12.4832	-1.57554	95.9724	-0.121129
3.82933	55.2368	12.4819	-1.57564	95.9619	-0.121137
3.83767	55.3201	12.4805	-1.57572	95.9514	-0.121143
3.846	55.4017	12.4792	-1.57581	95.9411	-0.12115
3.85433	55.4759	12.4778	-1.57588	95.9305	-0.121155
3.86267	55.5536	12.4764	-1.57587	95.9201	-0.121155
3.871	55.6352	12.4751	-1.57585	95.9095	-0.121153
3.87933	55.7172	12.4737	-1.57585	95.899	-0.121153
3.88767	55.7953	12.4724	-1.57585	95.8886	-0.121153
3.896	55.88	12.4711	-1.57583	95.8786	-0.121151
3.90433	55.9544	12.4698	-1.57575	95.8688	-0.121145
3.91267	56.0348	12.4685	-1.57567	95.8588	-0.121139
3.921	56.1164	12.4672	-1.57559	95.8488	-0.121133
3.92933	56.1948	12.4659	-1.57547	95.8389	-0.121124
3.93767	56.271	12.4646	-1.57534	95.8289	-0.121113
3.946	56.352	12.4633	-1.57519	95.819	-0.121102
3.95433	56.433	12.462	-1.57504	95.8092	-0.121091
3.96267	56.5121	12.4608	-1.57483	95.7995	-0.121075
3.971	56.5917	12.4595	-1.57462	95.7895	-0.121058
3.97933	56.6725	12.4582	-1.57436	95.7795	-0.121038
3.98767	56.7485	12.4569	-1.57418	95.7695	-0.121024
3.996	56.8319	12.4556	-1.57395	95.7594	-0.121006
4.00433	56.9112	12.4542	-1.57368	95.7493	-0.120986
4.01267	56.9926	12.4529	-1.5734	95.7393	-0.120964
4.021	57.0687	12.4517	-1.57316	95.7296	-0.120946
4.02933	57.1456	12.4504	-1.57288	95.7197	-0.120925
4.03767	57.225	12.4491	-1.5726	95.7099	-0.120903
4.046	57.3055	12.4478	-1.57232	95.6999	-0.120882
4.05433	57.3905	12.4465	-1.57195	95.69	-0.120853
4.06267	57.4612	12.4452	-1.5716	95.6801	-0.120826
4.071	57.5437	12.4439	-1.57123	95.6702	-0.120798
4.07933	57.6254	12.4427	-1.57084	95.6606	-0.120768
4.08767	57.7097	12.4415	-1.57046	95.6512	-0.120738
4.096	57.788	12.4402	-1.57004	95.6416	-0.120706
4.10433	57.8638	12.439	-1.56953	95.6321	-0.120667
4.11267	57.9482	12.4378	-1.56908	95.6227	-0.120632
4.121	58.0304	12.4365	-1.56858	95.6131	-0.120594
4.12933	58.1079	12.4353	-1.56808	95.6036	-0.120555
4.13767	58.1907	12.4341	-1.5676	95.5942	-0.120519
4.146	58.2557	12.4328	-1.56712	95.5848	-0.120482
4.15433	58.3426	12.4316	-1.5666	95.5756	-0.120441
4.16267	58.4195	12.4304	-1.56611	95.5664	-0.120404
4.171	58.5023	12.4292	-1.56556	95.5569	-0.120362
4.17933	58.5773	12.428	-1.56504	95.5475	-0.120322
4.18767	58.6561	12.4268	-1.56455	95.5381	-0.120284
4.196	58.7328	12.4255	-1.56396	95.5285	-0.120239
4.20433	58.8083	12.4243	-1.56335	95.5195	-0.120192
4.21267	58.8955	12.4231	-1.56273	95.5102	-0.120144
4.221	58.981	12.4219	-1.56212	95.501	-0.120097
4.22933	59.058	12.4207	-1.56151	95.4918	-0.12005
4.23767	59.1348	12.4195	-1.56088	95.4824	-0.120002
4.246	59.2093	12.4183	-1.56019	95.4732	-0.119949
4.25433	59.2972	12.4171	-1.55952	95.4641	-0.119897
4.26267	59.3739	12.4159	-1.55882	95.4549	-0.119843
4.271	59.4589	12.4147	-1.5581	95.4457	-0.119788
4.27933	59.5383	12.4136	-1.55742	95.4367	-0.119736
4.28767	59.6149	12.4124	-1.55679	95.4275	-0.119688
4.296	59.6985	12.4112	-1.55611	95.4184	-0.119635
4.30433	59.7802	12.41	-1.55543	95.4094	-0.119583
4.31267	59.861	12.4088	-1.55467	95.4004	-0.119525
4.321	59.9334	12.4077	-1.55397	95.3914	-0.11947
4.32933	60.0157	12.4065	-1.55324	95.3823	-0.119415
4.33767	60.0983	12.4053	-1.5525	95.3734	-0.119358
4.346	60.1762	12.4042	-1.55174	95.3644	-0.119299
4.35433	60.2542	12.403	-1.55098	95.3555	-0.119241
4.36267	60.3374	12.4018	-1.55022	95.3465	-0.119182
4.371	60.4189	12.4007	-1.54942	95.3376	-0.119121
4.37933	60.5015	12.3995	-1.54864	95.3288	-0.119061
4.38767	60.5782	12.3984	-1.54781	95.3198	-0.118997
4.396	60.6581	12.3972	-1.54703	95.311	-0.118937
4.40433	60.736	12.3961	-1.54622	95.3023	-0.118875
4.41267	60.816	12.3949	-1.54539	95.2935	-0.118811
4.421	60.8941	12.3938	-1.54459	95.2846	-0.11875
4.42933	60.9776	12.3927	-1.54376	95.2759	-0.118685
4.43767	61.0509	12.3915	-1.54295	95.2672	-0.118623
4.446	61.1409	12.3904	-1.54211	95.2585	-0.118559
4.45433	61.2167	12.3893	-1.54127	95.2499	-0.118494
4.46267	61.2968	12.3882	-1.54043	95.2415	-0.11843
4.471	61.3766	12.3871	-1.53959	95.2328	-0.118365
4.47933	61.4586	12.3859	-1.53872	95.2242	-0.118298
4.48767	61.5406	12.3848	-1.53782	95.2154	-0.118229
4.496	61.6143	12.3837	-1.53698	95.2071	-0.118164
4.50433	61.7009	12.3826	-1.53611	95.1986	-0.118098
4.51267	61.7798	12.3815	-1.53527	95.1899	-0.118033
4.521	61.8604	12.3804	-1.53438	95.1813	-0.117965
4.52933	61.9385	12.3792	-1.53351	95.1727	-0.117897
4.53767	62.0201	12.3781	-1.53264	95.1641	-0.117831
4.546	62.1052	12.377	-1.53176	95.1555	-0.117763
4.55433	62.1764	12.3759	-1.5309	95.147	-0.117697
4.56267	62.2631	12.3748	-1.53	95.1386	-0.117627
4.571	62.3393	12.3737	-1.5291	95.1304	-0.117559
4.57933	62.4234	12.3726	-1.52821	95.1218	-0.11749
4.58767	62.4966	12.3715	-1.5273	95.1134	-0.117421
4.596	62.5822	12.3704	-1.5264	95.1051	-0.117351
4.60433	62.6596	12.3694	-1.52544	95.0967	-0.117278
4.61267	62.7433	12.3683	-1.52447	95.0884	-0.117203
4.621	62.8199	12.3672	-1.52351	95.08	-0.117129
4.62933	62.9106	12.3661	-1.52255	95.0717	-0.117055
4.63767	62.9847	12.365	-1.52161	95.0634	-0.116983
4.646	63.0685	12.3639	-1.52072	95.0549	-0.116915
4.65433	63.1454	12.3628	-1.51981	95.0465	-0.116844
4.66267	63.2279	12.3617	-1.51889	95.038	-0.116773
4.671	63.3057	12.3606	-1.51793	95.0296	-0.1167
4.67933	63.3904	12.3595	-1.51696	95.0212	-0.116625
4.68767	63.4652	12.3585	-1.51603	95.013	-0.116554
4.696	63.5526	12.3574	-1.5151	95.0049	-0.116482
4.70433	63.6245	12.3563	-1.51416	94.9967	-0.11641
4.71267	63.7062	12.3553	-1.51321	94.9884	-0.116337
4.721	63.7916	12.3542	-1.51224	94.9799	-0.116262
4.72933	63.87	12.3531	-1.51127	94.9716	-0.116188
4.73767	63.9539	12.352	-1.5103	94.9636	-0.116113
4.746	64.0339	12.351	-1.5093	94.9555	-0.116036
4.75433	64.1161	12.3499	-1.50832	94.9474	-0.115961
4.76267	64.1998	12.3489	-1.50739	94.9393	-0.11589
4.771	64.2822	12.3478	-1.50643	94.9311	-0.115816
4.77933	64.3589	12.3467	-1.5055	94.9229	-0.115744
4.78767	64.4425	12.3457	-1.50456	94.9149	-0.115672
4.796	64.5245	12.3447	-1.50364	94.9069	-0.115601
4.80433	64.6034	12.3436	-1.50272	94.899	-0.115531
4.81267	64.6864	12.3426	-1.50178	94.891	-0.115458
4.821	64.765	12.3415	-1.50084	94.8829	-0.115386
4.82933	64.8453	12.3405	-1.4999	94.8748	-0.115314
4.83767	64.9276	12.3394	-1.49898	94.8667	-0.115243
4.846	65.0095	12.3384	-1.49806	94.8588	-0.115173
4.85433	65.0921	12.3374	-1.49716	94.8508	-0.115103
4.86267	65.1736	12.3363	-1.49624	94.8428	-0.115032
4.871	65.2558	12.3353	-1.49532	94.8347	-0.114962
4.87933	65.3378	12.3342	-1.49435	94.8268	-0.114887
4.88767	65.4169	12.3332	-1.49341	94.8188	-0.114814
4.896	65.4997	12.3321	-1.49249	94.8106	-0.114744
4.90433	65.5801	12.3311	-1.49161	94.8027	-0.114676
4.91267	65.6564	12.33	-1.49074	94.7945	-0.114609
4.921	65.7345	12.329	-1.48984	94.7865	-0.11454
4.92933	65.8225	12.328	-1.48894	94.7786	-0.114471
4.93767	65.9082	12.3269	-1.48808	94.7706	-0.114405
4.946	65.987	12.3259	-1.48723	94.7626	-0.11434
4.95433	66.0654	12.3248	-1.48635	94.7544	-0.114272
4.96267	66.1428	12.3238	-1.48555	94.7463	-0.11421
4.971	66.2298	12.3227	-1.48475	94.7382	-0.114149
4.97933	66.3096	12.3217	-1.48391	94.7302	-0.114084
4.98767	66.3945	12.3206	-1.48308	94.722	-0.114021
4.996	66.4721	12.3196	-1.48228	94.7141	-0.113959
5.00433	66.5539	12.3185	-1.48147	94.7059	-0.113897
5.01267	66.637	12.3174	-1.48068	94.6977	-0.113836
5.021	66.722	12.3164	-1.47989	94.6894	-0.113775
5.02933	66.801	12.3153	-1.4791	94.6814	-0.113715
5.03767	66.8825	12.3143	-1.47836	94.6735	-0.113658
5.046	66.9621	12.3133	-1.47763	94.6654	-0.113602
5.05433	67.0465	12.3122	-1.47692	94.6573	-0.113547
5.06267	67.1225	12.3111	-1.47625	94.6492	-0.113495
5.071	67.2065	12.3101	-1.47557	94.6411	-0.113443
5.07933	67.2857	12.309	-1.47489	94.6329	-0.113391
5.08767	67.3671	12.308	-1.47423	94.6248	-0.11334
5.096	67.4503	12.3069	-1.47362	94.6167	-0.113293
5.10433	67.5306	12.3059	-1.47302	94.6088	-0.113247
5.11267	67.6118	12.3048	-1.47241	94.6006	-0.113201
5.121	67.6918	12.3037	-1.47186	94.5922	-0.113158
5.12933	67.77	12.3026	-1.47129	94.5838	-0.113114
5.13767	67.856	12.3016	-1.47077	94.5754	-0.113074
5.146	67.9373	12.3005	-1.47027	94.5672	-0.113036
5.15433	68.0169	12.2994	-1.4698	94.559	-0.113
5.16267	68.1014	12.2983	-1.46938	94.5506	-0.112967
5.171	68.1875	12.2972	-1.46897	94.5423	-0.112936
5.17933	68.2681	12.2961	-1.46853	94.5337	-0.112902
5.18767	68.353	12.295	-1.46812	94.5252	-0.11287
5.196	68.426	12.2939	-1.46775	94.5168	-0.112842
5.20433	68.5086	12.2928	-1.46738	94.5083	-0.112813
5.21267	68.5973	12.2917	-1.46705	94.4997	-0.112788
5.221	68.6718	12.2906	-1.46668	94.4913	-0.11276
5.22933	68.7575	12.2895	-1.46634	94.4827	-0.112734
5.23767	68.8387	12.2884	-1.46601	94.4743	-0.112708
5.246	68.9176	12.2873	-1.46571	94.4659	-0.112685
5.25433	68.9981	12.2862	-1.46547	94.4573	-0.112667
5.26267	69.084	12.2851	-1.46525	94.4489	-0.11265
5.271	69.1645	12.284	-1.46505	94.4403	-0.112634
5.27933	69.2468	12.2828	-1.46485	94.4315	-0.112619
5.28767	69.3294	12.2817	-1.46467	94.423	-0.112605
5.296	69.409	12.2806	-1.46453	94.4147	-0.112594
5.30433	69.4909	12.2796	-1.46441	94.4063	-0.112585
5.31267	69.5687	12.2784	-1.46431	94.3976	-0.112577
5.321	69.6614	12.2773	-1.46422	94.389	-0.11257
5.32933	69.7368	12.2761	-1.46414	94.3802	-0.112564
5.33767	69.8218	12.275	-1.46405	94.3716	-0.112558
5.346	69.9019	12.2739	-1.46399	94.3626	-0.112553
5.35433	69.9791	12.2727	-1.46398	94.3537	-0.112552
5.36267	70.064	12.2716	-1.464	94.3452	-0.112554
5.371	70.144	12.2705	-1.46401	94.3363	-0.112555
5.37933	70.2201	12.2693	-1.46403	94.3275	-0.112556
5.38767	70.3089	12.2681	-1.46404	94.3184	-0.112557
5.396	70.3886	12.267	-1.46407	94.3096	-0.112559
5.40433	70.4725	12.2658	-1.46412	94.3007	-0.112563
5.41267	70.5506	12.2646	-1.46423	94.2917	-0.112571
5.421	70.6271	12.2635	-1.46435	94.2828	-0.11258
5.42933	70.7144	12.2623	-1.46449	94.2741	-0.112591
5.43767	70.7943	12.2612	-1.46463	94.2651	-0.112602
5.446	70.8788	12.26	-1.46476	94.2559	-0.112612
5.45433	70.9575	12.2588	-1.46492	94.247	-0.112625
5.46267	71.0358	12.2576	-1.46509	94.2378	-0.112637
5.471	71.1231	12.2564	-1.46531	94.2287	-0.112654
5.47933	71.2025	12.2553	-1.46553	94.2196	-0.112671
5.48767	71.2862	12.2541	-1.46576	94.2105	-0.112689
5.496	71.375	12.2529	-1.46596	94.2016	-0.112704
5.50433	71.4506	12.2517	-1.46616	94.1923	-0.11272
5.51267	71.5359	12.2505	-1.46641	94.183	-0.112739
5.521	71.6143	12.2494	-1.46664	94.1743	-0.112757
5.52933	71.6877	12.2482	-1.4669	94.1654	-0.112777
5.53767	71.7764	12.247	-1.46718	94.1564	-0.112799
5.546	71.8611	12.2459	-1.4675	94.1474	-0.112823
5.55433	71.9397	12.2447	-1.46778	94.1385	-0.112844
5.56267	72.0186	12.2435	-1.4681	94.1294	-0.112869
5.571	72.1046	12.2423	-1.46838	94.1202	-0.11289
5.57933	72.1845	12.2411	-1.46874	94.1109	-0.112918
5.58767	72.2657	12.24	-1.4691	94.1021	-0.112946
5.596	72.3484	12.2388	-1.46942	94.0932	-0.112971
5.60433	72.4314	12.2376	-1.46978	94.0839	-0.112998
5.61267	72.5092	12.2364	-1.47012	94.0746	-0.113024
5.621	72.5938	12.2352	-1.47046	94.0653	-0.11305
5.62933	72.6728	12.234	-1.47083	94.056	-0.113079
5.63767	72.7591	12.2328	-1.47123	94.0467	-0.113109
5.646	72.8371	12.2316	-1.47161	94.0375	-0.113139
5.65433	72.9199	12.2304	-1.47204	94.0282	-0.113171
5.66267	73.0042	12.2292	-1.4724	94.019	-0.113199
5.671	73.0885	12.2279	-1.47278	94.0095	-0.113229
5.67933	73.1663	12.2267	-1.4732	94.0001	-0.113261
5.68767	73.2507	12.2255	-1.4736	93.9909	-0.113292
5.696	73.3323	12.2243	-1.47403	93.9818	-0.113325
5.70433	73.4211	12.2231	-1.47447	93.9726	-0.113358
5.71267	73.4941	12.2219	-1.47489	93.9633	-0.113391
5.721	73.5748	12.2207	-1.47532	93.9539	-0.113424
5.72933	73.6574	12.2195	-1.47573	93.9445	-0.113456
5.73767	73.7454	12.2183	-1.47616	93.9351	-0.113488
5.746	73.8256	12.217	-1.4766	93.9256	-0.113523
5.75433	73.9052	12.2158	-1.47705	93.9163	-0.113557
5.76267	73.986	12.2146	-1.47749	93.9068	-0.113591
5.771	74.0743	12.2133	-1.47794	93.8973	-0.113625
5.77933	74.1549	12.2121	-1.47837	93.8877	-0.113658
5.78767	74.2392	12.2108	-1.47881	93.878	-0.113693
5.796	74.3166	12.2096	-1.47927	93.8686	-0.113728
5.80433	74.4044	12.2084	-1.4797	93.8593	-0.113761
5.81267	74.4869	12.2072	-1.48018	93.8499	-0.113798
5.821	74.5664	12.206	-1.48062	93.8405	-0.113832
5.82933	74.6468	12.2047	-1.48109	93.8312	-0.113867
5.83767	74.7307	12.2035	-1.48159	93.8214	-0.113906
5.846	74.8111	12.2022	-1.48209	93.8119	-0.113945
5.85433	74.8949	12.201	-1.4826	93.8025	-0.113983
5.86267	74.9777	12.1998	-1.48313	93.7931	-0.114024
5.871	75.0607	12.1986	-1.48359	93.7836	-0.11406
5.87933	75.1475	12.1973	-1.48404	93.774	-0.114094
5.88767	75.2258	12.1961	-1.48457	93.7645	-0.114135
5.896	75.3109	12.1948	-1.48507	93.755	-0.114173
5.90433	75.3881	12.1936	-1.4856	93.7453	-0.114214
5.91267	75.4719	12.1923	-1.48608	93.7356	-0.114251
5.921	75.5537	12.1911	-1.48655	93.7261	-0.114287
5.92933	75.6371	12.1898	-1.48703	93.7165	-0.114324
5.93767	75.7158	12.1886	-1.48751	93.7069	-0.114361
5.946	75.8004	12.1873	-1.48798	93.6971	-0.114397
5.95433	75.8835	12.1861	-1.48852	93.6876	-0.114439
5.96267	75.9689	12.1848	-1.48906	93.6782	-0.11448
5.971	76.0539	12.1836	-1.48953	93.6683	-0.114516
5.97933	76.1337	12.1823	-1.48999	93.6585	-0.114552
5.98767	76.2079	12.1811	-1.49046	93.649	-0.114588
5.996	76.296	12.1798	-1.49103	93.6395	-0.114632
6.00433	76.3761	12.1786	-1.49157	93.63	-0.114673
6.01267	76.4585	12.1773	-1.49209	93.6204	-0.114713
6.021	76.5484	12.1761	-1.49259	93.6108	-0.114752
6.02933	76.6261	12.1748	-1.49313	93.6012	-0.114793
6.03767	76.7105	12.1736	-1.49364	93.5914	-0.114833
6.046	76.7874	12.1723	-1.49416	93.5818	-0.114872
6.05433	76.8699	12.171	-1.49469	93.5721	-0.114913
6.06267	76.9566	12.1698	-1.49523	93.5625	-0.114954
6.071	77.0383	12.1685	-1.49573	93.5528	-0.114993
6.07933	77.1174	12.1673	-1.4962	93.5432	-0.115029
6.08767	77.2018	12.166	-1.49673	93.5334	-0.11507
6.096	77.2848	12.1647	-1.49727	93.5236	-0.115112
6.10433	77.3659	12.1635	-1.49782	93.5139	-0.115154
6.11267	77.4507	12.1622	-1.49834	93.5043	-0.115194
6.121	77.5304	12.161	-1.49886	93.4946	-0.115234
6.12933	77.6134	12.1597	-1.49939	93.485	-0.115274
6.13767	77.7021	12.1585	-1.49992	93.4755	-0.115315
6.146	77.7825	12.1572	-1.50049	93.4659	-0.115359
6.15433	77.8667	12.156	-1.50107	93.4563	-0.115403
6.16267	77.9484	12.1547	-1.50163	93.4466	-0.115447
6.171	78.0302	12.1534	-1.50215	93.4368	-0.115486
6.17933	78.112	12.1522	-1.50267	93.4272	-0.115526
6.18767	78.197	12.1509	-1.50319	93.4172	-0.115566
6.196	78.2791	12.1496	-1.50371	93.4075	-0.115607
6.20433	78.3596	12.1484	-1.50429	93.3976	-0.115651
6.21267	78.443	12.1471	-1.50485	93.3878	-0.115694
6.221	78.5279	12.1458	-1.50538	93.3778	-0.115735
6.22933	78.6067	12.1445	-1.50591	93.3677	-0.115776
6.23767	78.6895	12.1432	-1.50648	93.3578	-0.115819
6.246	78.7728	12.1419	-1.507	93.3477	-0.115859
6.25433	78.8571	12.1406	-1.50753	93.3377	-0.1159
6.26267	78.9396	12.1393	-1.50807	93.328	-0.115942
6.271	79.0244	12.138	-1.5086	93.3184	-0.115982
6.27933	79.1056	12.1368	-1.50915	93.3087	-0.116025
6.28767	79.1864	12.1355	-1.50968	93.2989	-0.116065
6.296	79.2695	12.1342	-1.51021	93.2889	-0.116106
6.30433	79.3528	12.1329	-1.51078	93.2791	-0.11615
6.31267	79.4342	12.1317	-1.51135	93.2693	-0.116194
6.321	79.5168	12.1304	-1.51188	93.2593	-0.116234
6.32933	79.5969	12.1291	-1.51243	93.2494	-0.116277
6.33767	79.688	12.1278	-1.51303	93.2397	-0.116324
6.346	79.7661	12.1265	-1.51359	93.2298	-0.116366
6.35433	79.8508	12.1252	-1.51422	93.2197	-0.116414
6.36267	79.9336	12.1239	-1.51484	93.2096	-0.116462
6.371	80.0121	12.1226	-1.51545	93.1996	-0.116509
6.37933	80.0977	12.1213	-1.51601	93.1897	-0.116553
6.38767	80.1822	12.12	-1.51656	93.18	-0.116594
6.396	80.2634	12.1188	-1.51712	93.1701	-0.116638
6.40433	80.342	12.1175	-1.5177	93.1602	-0.116682
6.41267	80.4268	12.1162	-1.51829	93.1504	-0.116727
6.421	80.5094	12.1149	-1.51882	93.1405	-0.116768
6.42933	80.5925	12.1136	-1.51942	93.1306	-0.116814
6.43767	80.6776	12.1124	-1.52	93.1209	-0.116859
6.446	80.7592	12.1111	-1.52055	93.111	-0.116901
6.45433	80.8487	12.1098	-1.5211	93.1012	-0.116944
6.46267	80.9295	12.1085	-1.52169	93.0912	-0.116989
6.471	81.0118	12.1072	-1.52225	93.081	-0.117032
6.47933	81.0944	12.1059	-1.52283	93.071	-0.117077
6.48767	81.1747	12.1046	-1.5234	93.061	-0.11712
6.496	81.2606	12.1033	-1.524	93.051	-0.117167
6.50433	81.3445	12.102	-1.5246	93.041	-0.117213
6.51267	81.4317	12.1006	-1.52514	93.0308	-0.117254
6.521	81.5062	12.0993	-1.52571	93.0207	-0.117298
6.52933	81.5904	12.098	-1.52624	93.0107	-0.117339
6.53767	81.6727	12.0967	-1.52677	93.0006	-0.117379
6.546	81.7589	12.0954	-1.52731	92.9905	-0.117421
6.55433	81.8423	12.0941	-1.52793	92.9805	-0.117468
6.56267	81.9196	12.0928	-1.52852	92.9705	-0.117514
6.571	82.0052	12.0915	-1.52911	92.9606	-0.11756
6.57933	82.0839	12.0902	-1.52967	92.9506	-0.117602
6.58767	82.1749	12.0889	-1.53021	92.9406	-0.117644
6.596	82.25	12.0876	-1.53077	92.9304	-0.117687
6.60433	82.3372	12.0863	-1.53129	92.9203	-0.117727
6.61267	82.4154	12.0849	-1.53182	92.9102	-0.117768
6.621	82.5035	12.0837	-1.53234	92.9003	-0.117808
6.62933	82.5843	12.0824	-1.53286	92.8904	-0.117848
6.63767	82.6656	12.0811	-1.53334	92.8804	-0.117885
6.646	82.7494	12.0798	-1.53383	92.8703	-0.117922
6.65433	82.8349	12.0784	-1.53433	92.8601	-0.117961
6.66267	82.9192	12.0771	-1.53478	92.8501	-0.117995
6.671	83.0059	12.0758	-1.53526	92.8401	-0.118032
6.67933	83.0846	12.0745	-1.53571	92.8302	-0.118067
6.68767	83.1647	12.0732	-1.5362	92.8201	-0.118104
6.696	83.2496	12.0719	-1.53669	92.8101	-0.118142
6.70433	83.3313	12.0706	-1.53718	92.8	-0.118179
6.71267	83.4145	12.0693	-1.53765	92.7896	-0.118216
6.721	83.4979	12.068	-1.53812	92.7797	-0.118252
6.72933	83.5738	12.0667	-1.53856	92.7699	-0.118286
6.73767	83.6633	12.0654	-1.53895	92.7601	-0.118316
6.746	83.7472	12.0641	-1.53942	92.75	-0.118352
6.75433	83.8293	12.0628	-1.53988	92.74	-0.118387
6.76267	83.911	12.0615	-1.5403	92.7299	-0.11842
6.771	83.9954	12.0602	-1.54068	92.7201	-0.118449
6.77933	84.0792	12.0589	-1.54104	92.7101	-0.118477
6.78767	84.1591	12.0576	-1.54142	92.7002	-0.118506
6.796	84.2422	12.0564	-1.54176	92.6905	-0.118532
6.80433	84.328	12.0551	-1.54208	92.6805	-0.118557
6.81267	84.4097	12.0537	-1.54242	92.6702	-0.118582
6.821	84.4901	12.0524	-1.54279	92.6599	-0.118611
6.82933	84.5711	12.0511	-1.54311	92.6502	-0.118636
6.83767	84.6543	12.0498	-1.5434	92.6403	-0.118658
6.846	84.735	12.0486	-1.54372	92.6304	-0.118683
6.85433	84.8189	12.0472	-1.54405	92.6203	-0.118708
6.86267	84.9054	12.0459	-1.54436	92.6103	-0.118732
6.871	84.9894	12.0447	-1.54464	92.6004	-0.118753
6.87933	85.0715	12.0434	-1.54493	92.5905	-0.118776
6.88767	85.1518	12.0421	-1.54522	92.5806	-0.118798
6.896	85.2354	12.0408	-1.54548	92.571	-0.118818
6.90433	85.3234	12.0396	-1.5457	92.5613	-0.118834
6.91267	85.4082	12.0383	-1.54589	92.5515	-0.118849
6.921	85.4888	12.037	-1.54611	92.5416	-0.118866
6.92933	85.5737	12.0357	-1.54628	92.5317	-0.118879
6.93767	85.6526	12.0345	-1.54649	92.522	-0.118895
6.946	85.7352	12.0332	-1.5467	92.5123	-0.118912
6.95433	85.8224	12.0319	-1.54689	92.5025	-0.118926
6.96267	85.9045	12.0306	-1.54705	92.4925	-0.118939
6.971	85.9836	12.0294	-1.54717	92.4829	-0.118948
6.97933	86.0708	12.0281	-1.54727	92.4731	-0.118955
6.98767	86.1499	12.0268	-1.54736	92.4634	-0.118963
6.996	86.2377	12.0256	-1.54745	92.4538	-0.118969
7.00433	86.3209	12.0243	-1.54749	92.4439	-0.118973
7.01267	86.4035	12.0231	-1.54757	92.4344	-0.118979
7.021	86.4903	12.0218	-1.54756	92.4249	-0.118978
7.02933	86.571	12.0206	-1.54754	92.4154	-0.118976
7.03767	86.6512	12.0193	-1.54755	92.4059	-0.118977
7.046	86.7358	12.0181	-1.54755	92.3963	-0.118977
7.05433	86.8175	12.0168	-1.54754	92.3866	-0.118976
7.06267	86.9043	12.0156	-1.54755	92.377	-0.118977
7.071	86.9839	12.0144	-1.5475	92.3675	-0.118974
7.07933	87.0681	12.0131	-1.54747	92.358	-0.118971
7.08767	87.1483	12.0119	-1.54741	92.3486	-0.118966
7.096	87.2374	12.0107	-1.54733	92.3391	-0.11896
7.10433	87.3185	12.0094	-1.54722	92.3297	-0.118952
7.11267	87.405	12.0082	-1.54712	92.3201	-0.118944
7.121	87.4871	12.007	-1.54697	92.3106	-0.118933
7.12933	87.5738	12.0058	-1.54683	92.3013	-0.118922
7.13767	87.6579	12.0046	-1.54665	92.2922	-0.118908
7.146	87.7383	12.0034	-1.54649	92.2829	-0.118896
7.15433	87.8237	12.0021	-1.54633	92.2735	-0.118883
7.16267	87.9108	12.0009	-1.54614	92.2643	-0.118868
7.171	87.9866	11.9997	-1.54594	92.2551	-0.118854
7.17933	88.0745	11.9985	-1.54572	92.2459	-0.118836
7.18767	88.1583	11.9973	-1.54551	92.2365	-0.118821
7.196	88.2414	11.9961	-1.54531	92.2273	-0.118805
7.20433	88.3253	11.9949	-1.54507	92.2181	-0.118786
7.21267	88.4046	11.9937	-1.54478	92.209	-0.118764
7.221	88.4872	11.9925	-1.54449	92.1997	-0.118741
7.22933	88.577	11.9913	-1.54415	92.1904	-0.118716
7.23767	88.6546	11.9901	-1.54384	92.1813	-0.118692
7.246	88.7345	11.9889	-1.54356	92.1719	-0.11867
7.25433	88.8253	11.9877	-1.54325	92.1627	-0.118646
7.26267	88.9072	11.9865	-1.5429	92.1535	-0.118619
7.271	88.9879	11.9853	-1.54254	92.1444	-0.118592
7.27933	89.0758	11.9842	-1.54211	92.1353	-0.118559
7.28767	89.1608	11.983	-1.54171	92.1262	-0.118528
7.296	89.2423	11.9818	-1.54133	92.1172	-0.118499
7.30433	89.3278	11.9806	-1.54097	92.1083	-0.118471
7.31267	89.4155	11.9795	-1.54057	92.0994	-0.11844
7.321	89.4957	11.9783	-1.54012	92.0904	-0.118406
7.32933	89.5791	11.9772	-1.53964	92.0817	-0.118369
7.33767	89.6642	11.976	-1.53916	92.0727	-0.118332
7.346	89.7485	11.9748	-1.53872	92.0635	-0.118298
7.35433	89.8305	11.9737	-1.53824	92.0546	-0.118261
7.36267	89.9115	11.9725	-1.53776	92.046	-0.118224
7.371	89.993	11.9714	-1.53726	92.0371	-0.118186
7.37933	90.0834	11.9703	-1.53674	92.0284	-0.118146
7.38767	90.166	11.9691	-1.53622	92.0195	-0.118106
7.396	90.2476	11.9679	-1.53571	92.0106	-0.118067
7.40433	90.3276	11.9668	-1.53521	92.0019	-0.118029
7.41267	90.4145	11.9657	-1.53466	91.9932	-0.117986
7.421	90.4972	11.9645	-1.5341	91.9843	-0.117943
7.42933	90.5838	11.9634	-1.53352	91.9757	-0.117898
7.43767	90.6683	11.9622	-1.53293	91.9669	-0.117853
7.446	90.7493	11.9611	-1.53234	91.9579	-0.117807
7.45433	90.8345	11.9599	-1.53174	91.949	-0.117761
7.46267	90.9151	11.9588	-1.53112	91.94	-0.117714
7.471	91.0002	11.9576	-1.53047	91.931	-0.117664
7.47933	91.0809	11.9565	-1.52981	91.9224	-0.117613
7.48767	91.1669	11.9553	-1.52911	91.9137	-0.117559
7.496	91.2508	11.9542	-1.52844	91.9051	-0.117508
7.50433	91.3346	11.9531	-1.52778	91.8965	-0.117457
7.51267	91.4205	11.9519	-1.52707	91.8876	-0.117403
7.521	91.5062	11.9508	-1.52638	91.879	-0.117349
7.52933	91.5854	11.9497	-1.52565	91.8705	-0.117293
7.53767	91.6719	11.9486	-1.5249	91.8621	-0.117236
7.546	91.7545	11.9475	-1.52418	91.8536	-0.117181
7.55433	91.8385	11.9464	-1.52344	91.8453	-0.117123
7.56267	91.9283	11.9453	-1.52266	91.8369	-0.117064
7.571	92.0106	11.9442	-1.52189	91.8283	-0.117005
7.57933	92.093	11.9431	-1.52111	91.8198	-0.116944
7.58767	92.1756	11.942	-1.52028	91.8115	-0.11688
7.596	92.261	11.941	-1.51945	91.8033	-0.116817
7.60433	92.3463	11.9399	-1.51865	91.7949	-0.116755
7.61267	92.4281	11.9388	-1.5178	91.7865	-0.11669
7.621	92.5134	11.9377	-1.51696	91.7783	-0.116625
7.62933	92.6004	11.9366	-1.5161	91.77	-0.116559
7.63767	92.6805	11.9355	-1.5152	91.7616	-0.11649
7.646	92.7662	11.9345	-1.51431	91.7533	-0.116421
7.65433	92.8487	11.9334	-1.51338	91.7449	-0.11635
7.66267	92.9335	11.9323	-1.51247	91.7366	-0.11628
7.671	93.0158	11.9312	-1.51156	91.7283	-0.11621
7.67933	93.0988	11.9302	-1.51066	91.7202	-0.116141
7.68767	93.1857	11.9291	-1.50971	91.7121	-0.116068
7.696	93.2697	11.9281	-1.50877	91.7041	-0.115995
7.70433	93.3507	11.927	-1.50781	91.6958	-0.115922
7.71267	93.4406	11.9259	-1.50682	91.6876	-0.115846
7.721	93.5178	11.9249	-1.50583	91.6794	-0.11577
7.72933	93.6025	11.9238	-1.50483	91.6715	-0.115693
7.73767	93.6932	11.9228	-1.50381	91.6636	-0.115614
7.746	93.7744	11.9218	-1.50275	91.6557	-0.115533
7.75433	93.8579	11.9207	-1.50168	91.6476	-0.115451
7.76267	93.9431	11.9197	-1.50057	91.6397	-0.115365
7.771	94.0273	11.9186	-1.49948	91.6317	-0.115281
7.77933	94.1106	11.9176	-1.49836	91.6237	-0.115195
7.78767	94.1949	11.9166	-1.49719	91.6158	-0.115106
7.796	94.2744	11.9156	-1.49607	91.6081	-0.115019
7.80433	94.3607	11.9146	-1.49492	91.6004	-0.114931
7.81267	94.4461	11.9136	-1.49375	91.5925	-0.114841
7.821	94.5276	11.9126	-1.49259	91.585	-0.114752
7.82933	94.6145	11.9116	-1.4914	91.5774	-0.11466
7.83767	94.7014	11.9106	-1.49019	91.5699	-0.114567
7.846	94.7873	11.9096	-1.48896	91.5622	-0.114473
7.85433	94.8676	11.9087	-1.4877	91.5549	-0.114375
7.86267	94.9463	11.9077	-1.48646	91.5473	-0.11428
7.871	95.0336	11.9067	-1.48518	91.5397	-0.114182
7.87933	95.1236	11.9057	-1.48384	91.5321	-0.114079
7.88767	95.2052	11.9047	-1.48249	91.5245	-0.113976
7.896	95.2907	11.9038	-1.48116	91.5171	-0.113873
7.90433	95.3703	11.9028	-1.47981	91.5095	-0.113769
7.91267	95.4564	11.9018	-1.47844	91.502	-0.113664
7.921	95.5423	11.9008	-1.47708	91.4944	-0.113559
7.92933	95.6252	11.8999	-1.47571	91.4871	-0.113454
7.93767	95.7092	11.8989	-1.47429	91.4795	-0.113345
7.946	95.7922	11.8979	-1.47287	91.4723	-0.113235
7.95433	95.8813	11.897	-1.47145	91.4651	-0.113126
7.96267	95.9641	11.8961	-1.47003	91.4579	-0.113017
7.971	96.048	11.8951	-1.46857	91.4508	-0.112905
7.97933	96.1325	11.8942	-1.46713	91.4435	-0.112794
7.98767	96.2204	11.8933	-1.46566	91.4365	-0.112681
7.996	96.3065	11.8923	-1.46415	91.4294	-0.112565
8.00433	96.3873	11.8914	-1.46263	91.4225	-0.112448
8.01267	96.472	11.8905	-1.46108	91.4156	-0.112329
8.021	96.5566	11.8897	-1.45956	91.4088	-0.112212
8.02933	96.6444	11.8888	-1.45801	91.4019	-0.112093
8.03767	96.7289	11.8879	-1.45645	91.3951	-0.111973
8.046	96.8144	11.887	-1.45487	91.3883	-0.111852
8.05433	96.8995	11.8861	-1.45329	91.3814	-0.111731
8.06267	96.9825	11.8852	-1.45164	91.3746	-0.111603
8.071	97.0699	11.8843	-1.45002	91.3679	-0.111479
8.07933	97.1481	11.8835	-1.44846	91.3611	-0.111359
8.08767	97.2335	11.8826	-1.44684	91.3542	-0.111235
8.096	97.3194	11.8817	-1.44522	91.3474	-0.11111
8.10433	97.4044	11.8808	-1.44361	91.3407	-0.110986
8.11267	97.4872	11.8799	-1.44198	91.334	-0.110861
8.121	97.5768	11.879	-1.44033	91.3271	-0.110734
8.12933	97.657	11.8782	-1.43869	91.3205	-0.110608
8.13767	97.7412	11.8773	-1.43704	91.3138	-0.110481
8.146	97.8282	11.8765	-1.43539	91.3073	-0.110354
8.15433	97.9152	11.8756	-1.43369	91.3006	-0.110223
8.16267	98.0023	11.8747	-1.43196	91.294	-0.11009
8.171	98.0802	11.8739	-1.43027	91.2875	-0.10996
8.17933	98.1675	11.873	-1.42856	91.281	-0.109829
8.18767	98.2531	11.8722	-1.42681	91.2743	-0.109694
8.196	98.3409	11.8713	-1.42507	91.2678	-0.10956
8.20433	98.4215	11.8705	-1.42336	91.2616	-0.109429
8.21267	98.5072	11.8697	-1.42165	91.2553	-0.109298
8.221	98.5918	11.8689	-1.41995	91.2488	-0.109167
8.22933	98.6767	11.868	-1.41824	91.2423	-0.109036
8.23767	98.7632	11.8672	-1.41653	91.236	-0.108904
8.246	98.848	11.8664	-1.41481	91.2297	-0.108772
8.25433	98.9329	11.8655	-1.41307	91.2234	-0.108638
8.26267	99.0119	11.8647	-1.41135	91.2171	-0.108506
8.271	99.1045	11.8639	-1.40962	91.211	-0.108373
8.27933	99.1893	11.8631	-1.40787	91.2046	-0.108239
8.28767	99.2718	11.8622	-1.40614	91.1981	-0.108105
8.296	99.3539	11.8614	-1.40439	91.1919	-0.10797
8.30433	99.435	11.8606	-1.40261	91.1857	-0.107834
8.31267	99.522	11.8598	-1.40087	91.1795	-0.1077
8.321	99.6125	11.859	-1.39914	91.1732	-0.107567
8.32933	99.6929	11.8582	-1.39739	91.167	-0.107432
8.33767	99.7789	11.8574	-1.39565	91.1608	-0.107299
8.346	99.8627	11.8566	-1.39391	91.1545	-0.107165
8.35433	99.9475	11.8558	-1.39219	91.1483	-0.107033
8.36267	100.033	11.855	-1.39049	91.1422	-0.106902
8.371	100.124	11.8542	-1.38877	91.1362	-0.10677
8.37933	100.21	11.8534	-1.38707	91.13	-0.106639
8.38767	100.291	11.8526	-1.38534	91.1239	-0.106506
8.396	100.377	11.8518	-1.38364	91.1178	-0.106375
8.40433	100.462	11.851	-1.38197	91.1116	-0.106247
8.41267	100.547	11.8502	-1.38027	91.1056	-0.106116
8.421	100.629	11.8494	-1.37856	91.0994	-0.105985
8.42933	100.714	11.8486	-1.37684	91.0933	-0.105853
8.43767	100.803	11.8478	-1.37513	91.0873	-0.105721
8.446	100.886	11.8471	-1.37338	91.0815	-0.105586
8.45433	100.97	11.8463	-1.37166	91.0754	-0.105454
8.46267	101.057	11.8455	-1.36996	91.0694	-0.105323
8.471	101.138	11.8447	-1.36828	91.0635	-0.105195
8.47933	101.225	11.844	-1.3666	91.0576	-0.105066
8.48767	101.309	11.8432	-1.36489	91.0519	-0.104934
8.496	101.394	11.8425	-1.3632	91.0461	-0.104804
8.50433	101.477	11.8417	-1.36149	91.0404	-0.104672
8.51267	101.563	11.841	-1.35983	91.0347	-0.104545
8.521	101.648	11.8402	-1.35814	91.0288	-0.104415
8.52933	101.727	11.8394	-1.35647	91.0227	-0.104287
8.53767	101.817	11.8387	-1.35473	91.0168	-0.104153
8.546	101.9	11.8379	-1.35301	91.0111	-0.104021
8.55433	101.983	11.8372	-1.35132	91.0052	-0.103891
8.56267	102.069	11.8364	-1.34962	90.9995	-0.10376
8.571	102.152	11.8357	-1.34791	90.9938	-0.103628
8.57933	102.241	11.8349	-1.3462	90.9879	-0.103497
8.58767	102.325	11.8342	-1.34453	90.9823	-0.103369
8.596	102.41	11.8334	-1.34285	90.9766	-0.10324
8.60433	102.493	11.8327	-1.34117	90.971	-0.10311
8.61267	102.574	11.832	-1.33951	90.9656	-0.102983
8.621	102.663	11.8313	-1.33786	90.9598	-0.102856
8.62933	102.749	11.8305	-1.33622	90.954	-0.10273
8.63767	102.832	11.8298	-1.33456	90.9482	-0.102602
8.646	102.914	11.829	-1.33288	90.9424	-0.102473
8.65433	103.002	11.8282	-1.33124	90.9365	-0.102347
8.66267	103.085	11.8275	-1.32965	90.9306	-0.102225
8.671	103.164	11.8267	-1.32802	90.925	-0.102099
8.67933	103.255	11.826	-1.32639	90.9191	-0.101974
8.68767	103.337	11.8252	-1.3248	90.9134	-0.101852
8.696	103.425	11.8245	-1.3232	90.9077	-0.101729
8.70433	103.508	11.8238	-1.3216	90.9022	-0.101606
8.71267	103.588	11.8231	-1.31998	90.8967	-0.101481
8.721	103.678	11.8224	-1.31838	90.8914	-0.101358
8.72933	103.764	11.8216	-1.31682	90.8859	-0.101238
8.73767	103.844	11.8209	-1.31521	90.8805	-0.101114
8.746	103.928	11.8202	-1.31358	90.8751	-0.100989
8.75433	104.014	11.8195	-1.31195	90.8695	-0.100864
8.76267	104.098	11.8188	-1.31034	90.8642	-0.10074
8.771	104.186	11.8181	-1.30872	90.8585	-0.100616
8.77933	104.269	11.8173	-1.30708	90.8526	-0.10049
8.78767	104.354	11.8166	-1.30547	90.8469	-0.100365
8.796	104.437	11.8159	-1.30388	90.8416	-0.100243
8.80433	104.529	11.8151	-1.30229	90.8359	-0.100121
8.81267	104.609	11.8144	-1.30068	90.8305	-0.0999978
8.821	104.695	11.8137	-1.29915	90.825	-0.0998797
8.82933	104.78	11.813	-1.29759	90.8197	-0.0997601
8.83767	104.867	11.8123	-1.29607	90.8141	-0.0996432
8.846	104.951	11.8116	-1.29452	90.8086	-0.0995236
8.85433	105.031	11.8109	-1.29298	90.8035	-0.0994058
8.86267	105.114	11.8102	-1.29149	90.7983	-0.0992907
8.871	105.205	11.8096	-1.29	90.793	-0.099176
8.87933	105.285	11.8089	-1.28847	90.7878	-0.0990585
8.88767	105.366	11.8082	-1.28693	90.7825	-0.09894
8.896	105.451	11.8075	-1.28537	90.7772	-0.0988206
8.90433	105.536	11.8068	-1.28384	90.7721	-0.0987025
8.91267	105.624	11.8062	-1.28231	90.7668	-0.0985849
8.921	105.709	11.8055	-1.28077	90.7617	-0.0984669
8.92933	105.793	11.8048	-1.27928	90.7565	-0.0983521
8.93767	105.877	11.8041	-1.27776	90.7511	-0.0982357
8.946	105.959	11.8034	-1.27623	90.7458	-0.0981177
8.95433	106.051	11.8027	-1.2747	90.7405	-0.0979999
8.96267	106.13	11.802	-1.27316	90.7351	-0.0978819
8.971	106.217	11.8013	-1.27164	90.7299	-0.0977647
8.97933	106.301	11.8007	-1.27016	90.7245	-0.0976512
8.98767	106.387	11.8	-1.26865	90.7192	-0.097535
8.996	106.468	11.7993	-1.26716	90.7139	-0.0974206
9.00433	106.555	11.7986	-1.26568	90.7086	-0.0973068
9.01267	106.638	11.7979	-1.26418	90.7034	-0.0971917
9.021	106.728	11.7972	-1.26269	90.6981	-0.0970769
9.02933	106.811	11.7965	-1.26122	90.6929	-0.0969639
9.03767	106.895	11.7958	-1.25979	90.6876	-0.0968539
9.046	106.979	11.7952	-1.25836	90.6824	-0.0967439
9.05433	107.06	11.7945	-1.25694	90.6771	-0.0966345
9.06267	107.147	11.7938	-1.25551	90.6717	-0.0965251
9.071	107.229	11.7931	-1.25408	90.6664	-0.096415
9.07933	107.317	11.7924	-1.25263	90.6611	-0.0963035
9.08767	107.399	11.7917	-1.25122	90.6558	-0.0961947
9.096	107.488	11.7911	-1.2498	90.6508	-0.0960858
9.10433	107.57	11.7904	-1.24837	90.6458	-0.0959757
9.11267	107.653	11.7898	-1.24691	90.6407	-0.095864
9.121	107.744	11.7891	-1.24549	90.6357	-0.0957544
9.12933	107.823	11.7884	-1.24409	90.6306	-0.0956469
9.13767	107.908	11.7878	-1.24268	90.6255	-0.0955382
9.146	107.989	11.7872	-1.24127	90.6207	-0.0954299
9.15433	108.072	11.7865	-1.23988	90.6156	-0.0953229
9.16267	108.159	11.7858	-1.23852	90.6106	-0.0952182
9.171	108.245	11.7852	-1.23713	90.6055	-0.0951115
9.17933	108.333	11.7845	-1.23573	90.6004	-0.0950042
9.18767	108.415	11.7838	-1.23438	90.5952	-0.0949
9.196	108.502	11.7832	-1.23305	90.5902	-0.0947982
9.20433	108.584	11.7825	-1.23171	90.5852	-0.0946947
9.21267	108.674	11.7819	-1.23036	90.5804	-0.0945912
9.221	108.756	11.7813	-1.229	90.5755	-0.0944869
9.22933	108.839	11.7806	-1.22764	90.5704	-0.0943821
9.23767	108.923	11.78	-1.2263	90.5654	-0.094279
9.246	109.008	11.7793	-1.22493	90.5603	-0.0941738
9.25433	109.088	11.7787	-1.22358	90.5554	-0.0940701
9.26267	109.178	11.778	-1.22227	90.5504	-0.0939692
9.271	109.262	11.7774	-1.22094	90.5455	-0.093867
9.27933	109.342	11.7767	-1.2196	90.5406	-0.0937643
9.28767	109.428	11.776	-1.21824	90.5353	-0.0936595
9.296	109.517	11.7754	-1.2169	90.5303	-0.0935561
9.30433	109.596	11.7748	-1.21559	90.5254	-0.093456
9.31267	109.682	11.7741	-1.2143	90.5205	-0.0933562
9.321	109.768	11.7735	-1.21298	90.5157	-0.0932547
9.32933	109.851	11.7729	-1.21165	90.5109	-0.0931526
9.33767	109.937	11.7722	-1.21034	90.5061	-0.093052
9.346	110.022	11.7716	-1.20903	90.5011	-0.0929516
9.35433	110.102	11.7709	-1.20775	90.4961	-0.0928526
9.36267	110.189	11.7703	-1.20644	90.4912	-0.0927521
9.371	110.269	11.7697	-1.20516	90.4865	-0.0926536
9.37933	110.361	11.7691	-1.20386	90.4817	-0.092554
9.38767	110.445	11.7684	-1.20255	90.4765	-0.0924531
9.396	110.525	11.7678	-1.20125	90.4716	-0.0923535
9.40433	110.612	11.7671	-1.19999	90.4665	-0.0922564
9.41267	110.697	11.7665	-1.19876	90.4615	-0.0921614
9.421	110.779	11.7658	-1.19747	90.4567	-0.0920628
9.42933	110.867	11.7652	-1.19623	90.4518	-0.0919676
9.43767	110.946	11.7646	-1.19497	90.4471	-0.0918705
9.446	111.035	11.7639	-1.19375	90.4422	-0.0917764
9.45433	111.114	11.7633	-1.19252	90.4375	-0.0916823
9.46267	111.198	11.7627	-1.19131	90.4328	-0.091589
9.471	111.282	11.7621	-1.19009	90.4281	-0.0914956
9.47933	111.372	11.7615	-1.18888	90.4234	-0.0914026
9.48767	111.457	11.7609	-1.18766	90.4187	-0.0913087
9.496	111.543	11.7602	-1.18644	90.4139	-0.0912149
9.50433	111.626	11.7596	-1.18524	90.409	-0.0911226
9.51267	111.714	11.759	-1.184	90.4043	-0.0910272
9.521	111.797	11.7584	-1.1828	90.3996	-0.090935
9.52933	111.884	11.7578	-1.18159	90.3947	-0.0908416
9.53767	111.966	11.7571	-1.18038	90.3898	-0.0907488
9.546	112.052	11.7565	-1.17919	90.3847	-0.0906575
9.55433	112.135	11.7558	-1.17802	90.3799	-0.0905674
9.56267	112.22	11.7552	-1.17683	90.375	-0.0904758
9.571	112.307	11.7546	-1.17564	90.3704	-0.0903841
9.57933	112.391	11.754	-1.17444	90.3657	-0.0902923
9.58767	112.478	11.7534	-1.17325	90.3611	-0.0902003
9.596	112.553	11.7528	-1.17207	90.3564	-0.0901102
9.60433	112.641	11.7522	-1.17089	90.3518	-0.0900192
9.61267	112.731	11.7516	-1.16973	90.3474	-0.0899296
9.621	112.811	11.751	-1.16857	90.3429	-0.0898406
9.62933	112.891	11.7504	-1.1674	90.3385	-0.0897508
9.63767	112.98	11.7499	-1.16625	90.334	-0.0896625
9.646	113.058	11.7493	-1.16513	90.3294	-0.089576
9.65433	113.148	11.7486	-1.16397	90.3247	-0.0894873
9.66267	113.237	11.748	-1.16284	90.3201	-0.0894004
9.671	113.319	11.7474	-1.16177	90.3153	-0.0893178
9.67933	113.399	11.7468	-1.16065	90.3106	-0.0892322
9.68767	113.489	11.7462	-1.15954	90.3059	-0.0891462
9.696	113.571	11.7456	-1.15844	90.301	-0.0890618
9.70433	113.659	11.745	-1.15735	90.2963	-0.0889781
9.71267	113.745	11.7444	-1.15626	90.2916	-0.0888946
9.721	113.828	11.7437	-1.15516	90.2868	-0.0888096
9.72933	113.908	11.7431	-1.15407	90.2823	-0.0887257
9.73767	113.993	11.7425	-1.15301	90.2776	-0.0886447
9.746	114.082	11.7419	-1.15195	90.273	-0.0885628
9.75433	114.169	11.7413	-1.15085	90.2684	-0.0884785
9.76267	114.248	11.7407	-1.14977	90.2639	-0.0883955
9.771	114.335	11.7402	-1.1487	90.2594	-0.0883134
9.77933	114.413	11.7396	-1.14764	90.255	-0.0882315
9.78767	114.501	11.739	-1.14655	90.2502	-0.0881481
9.796	114.586	11.7384	-1.14548	90.2459	-0.0880657
9.80433	114.673	11.7378	-1.14442	90.2415	-0.0879844
9.81267	114.754	11.7372	-1.14336	90.2369	-0.0879023
9.821	114.84	11.7366	-1.14228	90.2322	-0.0878194
9.82933	114.927	11.736	-1.14122	90.2277	-0.0877379
9.83767	115.008	11.7355	-1.14014	90.2233	-0.0876548
9.846	115.091	11.7348	-1.13908	90.2185	-0.0875737
9.85433	115.179	11.7342	-1.138	90.2139	-0.0874907
9.86267	115.261	11.7336	-1.13693	90.2092	-0.087408
9.871	115.347	11.7331	-1.13587	90.2048	-0.0873264
9.87933	115.434	11.7325	-1.13484	90.2001	-0.0872473
9.88767	115.515	11.7319	-1.13379	90.1957	-0.0871666
9.896	115.599	11.7313	-1.13276	90.1911	-0.0870876
9.90433	115.684	11.7307	-1.13174	90.1869	-0.0870089
9.91267	115.772	11.7301	-1.13074	90.1824	-0.0869324
9.921	115.856	11.7295	-1.12977	90.1778	-0.0868574
9.92933	115.941	11.729	-1.12875	90.1734	-0.0867792
9.93767	116.021	11.7284	-1.12777	90.169	-0.0867041
9.946	116.108	11.7278	-1.12679	90.1645	-0.0866287
9.95433	116.194	11.7272	-1.12583	90.1599	-0.0865548
9.96267	116.278	11.7267	-1.12484	90.1556	-0.086479
9.971	116.361	11.7261	-1.12386	90.151	-0.0864033
9.97933	116.445	11.7255	-1.12287	90.1467	-0.086327
9.98767	116.525	11.7249	-1.12191	90.1421	-0.0862536
9.996	116.615	11.7243	-1.12091	90.1378	-0.0861768
10.0043	116.698	11.7238	-1.11994	90.1333	-0.086102
10.0127	116.781	11.7232	-1.11899	90.129	-0.086029
10.021	116.867	11.7226	-1.11801	90.1246	-0.0859537
10.0293	116.952	11.7221	-1.11705	90.1203	-0.0858801
10.0377	117.035	11.7215	-1.11607	90.1159	-0.0858048
10.046	117.122	11.7209	-1.11509	90.1113	-0.085729
10.0543	117.202	11.7203	-1.11417	90.107	-0.0856584
10.0627	117.285	11.7198	-1.11321	90.1026	-0.0855849
10.071	117.372	11.7192	-1.11224	90.0983	-0.0855103
10.0793	117.455	11.7187	-1.1113	90.0941	-0.0854374
10.0877	117.542	11.7181	-1.11036	90.0898	-0.0853653
10.096	117.623	11.7175	-1.10941	90.0856	-0.0852921
10.1043	117.707	11.717	-1.10849	90.0812	-0.0852214
10.1127	117.792	11.7164	-1.10757	90.0767	-0.0851508
10.121	117.877	11.7158	-1.10666	90.0721	-0.0850807
10.1293	117.964	11.7152	-1.10579	90.0677	-0.0850138
10.1377	118.046	11.7147	-1.10486	90.0633	-0.0849427
10.146	118.132	11.7141	-1.10394	90.059	-0.0848719
10.1543	118.208	11.7135	-1.10305	90.0545	-0.0848033
10.1627	118.298	11.7129	-1.10215	90.05	-0.084734
10.171	118.381	11.7123	-1.10123	90.0455	-0.0846639
10.1793	118.468	11.7118	-1.10034	90.0412	-0.0845951
10.1877	118.545	11.7112	-1.09945	90.037	-0.0845266
10.196	118.64	11.7107	-1.09855	90.0329	-0.0844575
10.2043	118.718	11.7102	-1.09766	90.0288	-0.0843893
10.2127	118.803	11.7096	-1.09676	90.0246	-0.0843198
10.221	118.891	11.709	-1.09587	90.0202	-0.0842516
10.2293	118.972	11.7085	-1.09502	90.0157	-0.0841864
10.2377	119.056	11.7079	-1.09415	90.0115	-0.0841196
10.246	119.143	11.7073	-1.09329	90.0071	-0.0840534
10.2543	119.225	11.7068	-1.09246	90.0029	-0.0839891
10.2627	119.306	11.7062	-1.09163	89.9985	-0.0839255
10.271	119.393	11.7057	-1.09081	89.9943	-0.0838623
10.2793	119.477	11.7051	-1.09	89.99	-0.0838
10.2877	119.566	11.7045	-1.08917	89.9856	-0.0837362
10.296	119.648	11.704	-1.08834	89.9813	-0.0836726
10.3043	119.733	11.7034	-1.08751	89.9771	-0.0836088
10.3127	119.821	11.7029	-1.08667	89.9728	-0.083544
10.321	119.899	11.7023	-1.08589	89.9687	-0.0834845
10.3293	119.986	11.7018	-1.08509	89.9644	-0.0834225
10.3377	120.068	11.7012	-1.08428	89.9602	-0.0833604
10.346	120.155	11.7007	-1.08347	89.9557	-0.0832983
10.3543	120.239	11.7001	-1.08267	89.9511	-0.0832363
10.3627	120.323	11.6995	-1.08183	89.9467	-0.0831724
10.371	120.406	11.6989	-1.08101	89.9426	-0.0831088
10.3793	120.484	11.6984	-1.08021	89.9384	-0.0830477
10.3877	120.569	11.6979	-1.07943	89.9341	-0.0829876
10.396	120.657	11.6973	-1.07866	89.9299	-0.0829287
10.4043	120.739	11.6967	-1.07785	89.9257	-0.082866
10.4127	120.824	11.6962	-1.0771	89.9213	-0.0828087
10.421	120.909	11.6956	-1.07634	89.917	-0.0827496
10.4293	120.992	11.6951	-1.07555	89.9128	-0.0826891
10.4377	121.078	11.6945	-1.07478	89.9087	-0.0826299
10.446	121.165	11.694	-1.07405	89.9047	-0.0825736
10.4543	121.249	11.6935	-1.07331	89.9005	-0.0825169
10.4627	121.324	11.6929	-1.07254	89.8963	-0.082458
10.471	121.414	11.6924	-1.07179	89.8922	-0.0824005
10.4793	121.496	11.6919	-1.07105	89.8881	-0.0823436
10.4877	121.583	11.6913	-1.07032	89.8839	-0.0822874
10.496	121.671	11.6908	-1.06957	89.8797	-0.0822296
10.5043	121.746	11.6902	-1.06882	89.8756	-0.0821715
10.5127	121.831	11.6897	-1.06812	89.8716	-0.082118
10.521	121.915	11.6892	-1.0674	89.8676	-0.0820625
10.5293	121.999	11.6886	-1.06667	89.8633	-0.0820066
10.5377	122.083	11.6881	-1.06598	89.859	-0.0819535
10.546	122.17	11.6876	-1.06528	89.855	-0.0818994
10.5543	122.255	11.687	-1.06457	89.8509	-0.0818454
10.5627	122.344	11.6865	-1.06387	89.8466	-0.0817911
10.571	122.427	11.6859	-1.06313	89.8421	-0.0817348
10.5793	122.513	11.6854	-1.06242	89.8381	-0.0816797
10.5877	122.594	11.6848	-1.0617	89.8341	-0.0816245
10.596	122.678	11.6843	-1.06095	89.83	-0.0815668
10.6043	122.758	11.6837	-1.06022	89.8257	-0.0815107
10.6127	122.848	11.6832	-1.0595	89.8215	-0.0814555
10.621	122.926	11.6827	-1.05878	89.8173	-0.0813997
10.6293	123.015	11.6821	-1.05807	89.8127	-0.0813456
10.6377	123.098	11.6815	-1.05736	89.8083	-0.0812904
10.646	123.176	11.6809	-1.05666	89.8041	-0.0812367
10.6543	123.265	11.6804	-1.05598	89.8001	-0.0811849
10.6627	123.348	11.6799	-1.0553	89.7958	-0.0811327
10.671	123.43	11.6793	-1.05464	89.7914	-0.0810814
10.6793	123.513	11.6787	-1.054	89.7871	-0.0810326
10.6877	123.599	11.6782	-1.05335	89.7829	-0.0809822
10.696	123.682	11.6776	-1.05268	89.7786	-0.0809306
10.7043	123.767	11.6771	-1.05201	89.7745	-0.0808799
10.7127	123.856	11.6766	-1.05135	89.7704	-0.0808291
10.721	123.937	11.676	-1.05071	89.7663	-0.0807798
10.7293	124.016	11.6755	-1.05007	89.7623	-0.0807306
10.7377	124.1	11.675	-1.04941	89.7582	-0.0806799
10.746	124.188	11.6744	-1.04872	89.7541	-0.0806269
10.7543	124.269	11.6739	-1.04806	89.7501	-0.080576
10.7627	124.357	11.6734	-1.04741	89.746	-0.0805258
10.771	124.437	11.6729	-1.04679	89.7422	-0.0804778
10.7793	124.523	11.6724	-1.04618	89.7382	-0.0804309
10.7877	124.604	11.6718	-1.04556	89.7339	-0.0803835
10.796	124.686	11.6713	-1.0449	89.73	-0.0803332
10.8043	124.771	11.6708	-1.04424	89.7261	-0.0802823
10.8127	124.857	11.6703	-1.04358	89.722	-0.0802317
10.821	124.939	11.6697	-1.04294	89.718	-0.0801822
10.8293	125.027	11.6692	-1.04232	89.7137	-0.0801349
10.8377	125.112	11.6686	-1.04169	89.7094	-0.080086
10.846	125.195	11.6681	-1.04106	89.7053	-0.0800378
10.8543	125.273	11.6676	-1.04042	89.7013	-0.0799885
10.8627	125.359	11.667	-1.03977	89.6973	-0.0799385
10.871	125.448	11.6666	-1.03913	89.6935	-0.079889
10.8793	125.533	11.666	-1.03851	89.6894	-0.0798416
10.8877	125.617	11.6655	-1.03791	89.6851	-0.0797953
10.896	125.696	11.6649	-1.0373	89.681	-0.0797489
10.9043	125.782	11.6644	-1.03668	89.6769	-0.0797009
10.9127	125.863	11.6639	-1.03608	89.673	-0.0796545
10.921	125.95	11.6634	-1.03549	89.6691	-0.0796096
10.9293	126.035	11.6628	-1.0349	89.6649	-0.0795641
10.9377	126.12	11.6623	-1.03429	89.6607	-0.0795172
10.946	126.202	11.6618	-1.0337	89.6567	-0.0794715
10.9543	126.292	11.6612	-1.03309	89.6526	-0.0794251
10.9627	126.368	11.6607	-1.0325	89.6487	-0.0793793
10.971	126.454	11.6602	-1.0319	89.6448	-0.0793337
10.9793	126.539	11.6597	-1.03131	89.6408	-0.0792881
10.9877	126.62	11.6592	-1.03071	89.6369	-0.0792418
10.996	126.707	11.6587	-1.03013	89.6331	-0.0791975
11.0043	126.796	11.6582	-1.02953	89.6291	-0.0791515
11.0127	126.879	11.6577	-1.02893	89.6252	-0.0791054
11.021	126.961	11.6571	-1.02833	89.6212	-0.0790593
11.0293	127.044	11.6566	-1.02773	89.6172	-0.0790127
11.0377	127.127	11.6561	-1.02712	89.6132	-0.0789662
11.046	127.211	11.6556	-1.02653	89.6091	-0.0789208
11.0543	127.299	11.655	-1.02593	89.6051	-0.0788744
11.0627	127.373	11.6546	-1.02534	89.6012	-0.0788291
11.071	127.462	11.654	-1.02473	89.5972	-0.0787825
11.0793	127.546	11.6535	-1.02412	89.5933	-0.0787354
11.0877	127.626	11.653	-1.02354	89.5892	-0.078691
11.096	127.715	11.6525	-1.02294	89.5852	-0.0786444
11.1043	127.796	11.652	-1.02235	89.5813	-0.0785994
11.1127	127.884	11.6515	-1.02178	89.5774	-0.0785555
11.121	127.97	11.6509	-1.02121	89.5736	-0.0785118
11.1293	128.048	11.6504	-1.02064	89.5696	-0.0784677
11.1377	128.132	11.65	-1.0201	89.5659	-0.0784259
11.146	128.219	11.6494	-1.01955	89.5619	-0.0783839
11.1543	128.301	11.6489	-1.01907	89.558	-0.0783473
11.1627	128.383	11.6484	-1.01855	89.554	-0.0783069
11.171	128.475	11.6479	-1.01799	89.5502	-0.0782644
11.1793	128.557	11.6474	-1.01744	89.5463	-0.0782213
11.1877	128.643	11.6469	-1.0169	89.5424	-0.07818
11.196	128.723	11.6464	-1.01636	89.5384	-0.0781384
11.2043	128.805	11.6459	-1.01581	89.5344	-0.0780966
11.2127	128.892	11.6454	-1.01527	89.5305	-0.0780545
11.221	128.973	11.6448	-1.01469	89.5264	-0.0780104
11.2293	129.059	11.6443	-1.01412	89.5223	-0.0779662
11.2377	129.144	11.6438	-1.01353	89.5183	-0.0779211
11.246	129.227	11.6432	-1.01296	89.5141	-0.0778771
11.2543	129.31	11.6427	-1.01238	89.5101	-0.0778328
11.2627	129.393	11.6422	-1.01184	89.5062	-0.0777913
11.271	129.476	11.6417	-1.01128	89.5024	-0.0777479
11.2793	129.561	11.6412	-1.01074	89.4985	-0.0777065
11.2877	129.644	11.6407	-1.01023	89.4945	-0.0776677
11.296	129.73	11.6402	-1.0097	89.4906	-0.0776263
11.3043	129.812	11.6396	-1.00915	89.4866	-0.0775841
11.3127	129.898	11.6391	-1.00858	89.4828	-0.0775404
11.321	129.981	11.6387	-1.00803	89.479	-0.0774986
11.3293	130.07	11.6382	-1.00749	89.4754	-0.077457
11.3377	130.145	11.6377	-1.00697	89.4715	-0.077417
11.346	130.234	11.6372	-1.00645	89.4676	-0.0773764
11.3543	130.315	11.6367	-1.00596	89.4638	-0.077339
11.3627	130.401	11.6362	-1.00543	89.4599	-0.0772981
11.371	130.484	11.6357	-1.00484	89.456	-0.0772529
11.3793	130.569	11.6352	-1.0043	89.4522	-0.0772114
11.3877	130.65	11.6347	-1.00381	89.4486	-0.0771741
11.396	130.741	11.6342	-1.00333	89.4446	-0.0771372
11.4043	130.821	11.6336	-1.00279	89.4406	-0.0770956
11.4127	130.906	11.6331	-1.00225	89.4366	-0.0770542
11.421	130.988	11.6326	-1.00173	89.4326	-0.0770136
11.4293	131.073	11.6321	-1.00117	89.4287	-0.0769705
11.4377	131.156	11.6316	-1.00059	89.4248	-0.0769263
11.446	131.243	11.6311	-1.00006	89.421	-0.0768858
11.4543	131.326	11.6306	-0.999548	89.4172	-0.0768462
11.4627	131.411	11.6301	-0.999004	89.4132	-0.0768043
11.471	131.492	11.6296	-0.998427	89.4091	-0.07676
11.4793	131.584	11.6291	-0.997848	89.4053	-0.0767155
11.4877	131.666	11.6286	-0.997279	89.4017	-0.0766717
11.496	131.744	11.6281	-0.996713	89.3981	-0.0766282
11.5043	131.826	11.6276	-0.996123	89.3944	-0.0765828
11.5127	131.909	11.6271	-0.995583	89.3905	-0.0765413
11.521	131.996	11.6266	-0.995047	89.3867	-0.0765001
11.5293	132.081	11.6261	-0.994467	89.3827	-0.0764555
11.5377	132.163	11.6256	-0.99392	89.3789	-0.0764135
11.546	132.252	11.6252	-0.993395	89.3753	-0.0763731
11.5543	132.335	11.6247	-0.992844	89.3717	-0.0763308
11.5627	132.42	11.6242	-0.992287	89.368	-0.0762879
11.571	132.505	11.6237	-0.991742	89.3641	-0.076246
11.5793	132.584	11.6232	-0.991202	89.3602	-0.0762045
11.5877	132.673	11.6227	-0.990684	89.3565	-0.0761647
11.596	132.751	11.6222	-0.990138	89.3527	-0.0761227
11.6043	132.838	11.6217	-0.98954	89.3488	-0.0760767
11.6127	132.92	11.6212	-0.988974	89.3452	-0.0760332
11.621	133.005	11.6208	-0.988406	89.3417	-0.0759896
11.6293	133.088	11.6203	-0.987833	89.3378	-0.0759455
11.6377	133.172	11.6198	-0.987266	89.3342	-0.0759019
11.646	133.256	11.6193	-0.986714	89.3305	-0.0758595
11.6543	133.337	11.6189	-0.986178	89.3269	-0.0758182
11.6627	133.424	11.6184	-0.985616	89.3232	-0.075775
11.671	133.508	11.6179	-0.985032	89.3195	-0.0757301
11.6793	133.594	11.6174	-0.984459	89.316	-0.0756861
11.6877	133.675	11.617	-0.983902	89.3122	-0.0756433
11.696	133.762	11.6165	-0.983308	89.3084	-0.0755976
11.7043	133.843	11.616	-0.982698	89.3046	-0.0755507
11.7127	133.929	11.6155	-0.982108	89.3011	-0.0755054
11.721	134.011	11.615	-0.981515	89.2973	-0.0754598
11.7293	134.099	11.6145	-0.980917	89.2936	-0.0754138
11.7377	134.183	11.6141	-0.980311	89.29	-0.0753672
11.746	134.267	11.6136	-0.979723	89.2863	-0.075322
11.7543	134.347	11.6131	-0.97914	89.2826	-0.0752771
11.7627	134.436	11.6126	-0.978572	89.279	-0.0752335
11.771	134.52	11.6122	-0.978014	89.2755	-0.0751906
11.7793	134.603	11.6117	-0.977442	89.272	-0.0751466
11.7877	134.688	11.6113	-0.976881	89.2684	-0.0751035
11.796	134.773	11.6108	-0.976278	89.2647	-0.0750571
11.8043	134.857	11.6103	-0.975688	89.2612	-0.0750117
11.8127	134.938	11.6098	-0.975093	89.2576	-0.0749661
11.821	135.023	11.6094	-0.974494	89.2539	-0.07492
11.8293	135.106	11.6089	-0.973905	89.25	-0.0748747
11.8377	135.188	11.6084	-0.97331	89.2466	-0.0748289
11.846	135.274	11.6079	-0.97266	89.2429	-0.074779
11.8543	135.355	11.6075	-0.972026	89.2393	-0.0747302
11.8627	135.439	11.607	-0.971425	89.2358	-0.074684
11.871	135.524	11.6065	-0.970793	89.2321	-0.0746355
11.8793	135.611	11.6061	-0.970196	89.2284	-0.0745895
11.8877	135.688	11.6056	-0.969596	89.2251	-0.0745434
11.896	135.778	11.6052	-0.969009	89.2215	-0.0744983
11.9043	135.861	11.6047	-0.968409	89.2181	-0.0744522
11.9127	135.948	11.6043	-0.967811	89.2147	-0.0744062
11.921	136.03	11.6038	-0.967227	89.2109	-0.0743613
11.9293	136.116	11.6033	-0.966668	89.2075	-0.0743183
11.9377	136.198	11.6029	-0.966078	89.2039	-0.074273
11.946	136.28	11.6024	-0.965464	89.2005	-0.0742258
11.9543	136.361	11.602	-0.964861	89.1971	-0.0741794
11.9627	136.451	11.6015	-0.964244	89.1938	-0.074132
11.971	136.538	11.6011	-0.963627	89.1902	-0.0740845
11.9793	136.616	11.6006	-0.963045	89.1866	-0.0740398
11.9877	136.703	11.6002	-0.962448	89.1832	-0.0739939
11.996	136.786	11.5998	-0.961817	89.1799	-0.0739454
12.0043	136.87	11.5993	-0.961163	89.1768	-0.0738951
12.0127	136.953	11.5989	-0.960525	89.1733	-0.073846
12.021	137.035	11.5984	-0.959887	89.1696	-0.073797
12.0293	137.119	11.5979	-0.959274	89.166	-0.0737499
12.0377	137.204	11.5975	-0.958671	89.1624	-0.0737035
12.046	137.29	11.597	-0.958045	89.1587	-0.0736554
12.0543	137.371	11.5965	-0.957416	89.1552	-0.073607
12.0627	137.45	11.5961	-0.95674	89.152	-0.073555
12.071	137.539	11.5957	-0.956102	89.1487	-0.073506
12.0793	137.621	11.5952	-0.955493	89.1451	-0.0734591
12.0877	137.708	11.5948	-0.954897	89.1416	-0.0734134
12.096	137.791	11.5943	-0.954276	89.1383	-0.0733656
12.1043	137.876	11.5939	-0.953664	89.1351	-0.0733186
12.1127	137.959	11.5935	-0.953059	89.1319	-0.073272
12.121	138.038	11.5931	-0.952453	89.1286	-0.0732254
12.1293	138.129	11.5927	-0.951854	89.1253	-0.0731794
12.1377	138.211	11.5922	-0.951236	89.122	-0.0731319
12.146	138.298	11.5918	-0.950655	89.1185	-0.0730872
12.1543	138.38	11.5913	-0.950039	89.115	-0.0730399
12.1627	138.465	11.5909	-0.949419	89.1117	-0.0729922
12.171	138.548	11.5905	-0.948783	89.1084	-0.0729433
12.1793	138.634	11.59	-0.948157	89.1051	-0.0728952
12.1877	138.72	11.5896	-0.947529	89.1017	-0.0728469
12.196	138.805	11.5891	-0.94687	89.0984	-0.0727963
12.2043	138.886	11.5887	-0.946189	89.0951	-0.0727439
12.2127	138.973	11.5883	-0.945539	89.0918	-0.0726939
12.221	139.054	11.5879	-0.944935	89.0886	-0.0726474
12.2293	139.14	11.5874	-0.944302	89.0852	-0.0725988
12.2377	139.225	11.587	-0.943666	89.0819	-0.0725499
12.246	139.312	11.5866	-0.943021	89.0787	-0.0725003
12.2543	139.393	11.5861	-0.942389	89.0753	-0.0724518
12.2627	139.475	11.5857	-0.941744	89.0721	-0.0724022
12.271	139.562	11.5853	-0.941126	89.0688	-0.0723547
12.2793	139.646	11.5849	-0.940532	89.0658	-0.0723089
12.2877	139.728	11.5845	-0.939939	89.0628	-0.0722634
12.296	139.816	11.5841	-0.939318	89.0597	-0.0722156
12.3043	139.9	11.5837	-0.938692	89.0563	-0.0721675
12.3127	139.981	11.5832	-0.938037	89.0531	-0.0721171
12.321	140.069	11.5829	-0.937406	89.0501	-0.0720686
12.3293	140.154	11.5824	-0.936765	89.0469	-0.0720193
12.3377	140.236	11.582	-0.936171	89.0437	-0.0719737
12.346	140.317	11.5816	-0.935577	89.0402	-0.071928
12.3543	140.402	11.5811	-0.934963	89.0369	-0.0718808
12.3627	140.485	11.5807	-0.934322	89.0334	-0.0718316
12.371	140.57	11.5802	-0.933701	89.0299	-0.0717838
12.3793	140.653	11.5798	-0.933079	89.0266	-0.0717359
12.3877	140.734	11.5794	-0.932461	89.0233	-0.0716885
12.396	140.819	11.579	-0.931865	89.0201	-0.0716427
12.4043	140.904	11.5785	-0.931261	89.0168	-0.0715962
12.4127	140.984	11.5781	-0.930661	89.0136	-0.0715501
12.421	141.078	11.5777	-0.930013	89.0106	-0.0715002
12.4293	141.156	11.5774	-0.929381	89.0078	-0.0714516
12.4377	141.242	11.5769	-0.928753	89.0045	-0.0714034
12.446	141.33	11.5765	-0.928153	89.0014	-0.0713573
12.4543	141.407	11.5761	-0.927543	88.9983	-0.0713103
12.4627	141.491	11.5757	-0.926937	88.9953	-0.0712638
12.471	141.578	11.5753	-0.926307	88.9922	-0.0712153
12.4793	141.659	11.5749	-0.925707	88.989	-0.0711692
12.4877	141.75	11.5745	-0.925118	88.9858	-0.0711239
12.496	141.826	11.5741	-0.924516	88.9825	-0.0710777
12.5043	141.907	11.5737	-0.923914	88.9793	-0.0710313
12.5127	142	11.5732	-0.923325	88.976	-0.070986
12.521	142.079	11.5728	-0.922718	88.9729	-0.0709394
12.5293	142.166	11.5724	-0.922115	88.9698	-0.070893
12.5377	142.247	11.572	-0.92149	88.9665	-0.070845
12.546	142.333	11.5716	-0.920884	88.9634	-0.0707984
12.5543	142.419	11.5712	-0.920286	88.9603	-0.0707524
12.5627	142.5	11.5708	-0.919662	88.9571	-0.0707044
12.571	142.585	11.5704	-0.919024	88.954	-0.0706554
12.5793	142.668	11.57	-0.918394	88.951	-0.070607
12.5877	142.751	11.5696	-0.91778	88.9481	-0.0705598
12.596	142.838	11.5692	-0.917169	88.9449	-0.0705128
12.6043	142.919	11.5688	-0.91657	88.9417	-0.0704667
12.6127	143.006	11.5684	-0.915945	88.9385	-0.0704187
12.621	143.091	11.5679	-0.915376	88.9355	-0.070375
12.6293	143.173	11.5676	-0.914789	88.9325	-0.0703298
12.6377	143.26	11.5671	-0.914185	88.9293	-0.0702834
12.646	143.343	11.5667	-0.913587	88.9261	-0.0702374
12.6543	143.428	11.5663	-0.912988	88.9231	-0.0701914
12.6627	143.515	11.5659	-0.912405	88.9198	-0.0701465
12.671	143.595	11.5655	-0.911821	88.9166	-0.0701016
12.6793	143.681	11.5651	-0.911251	88.9135	-0.0700578
12.6877	143.763	11.5647	-0.910659	88.9105	-0.0700123
12.696	143.845	11.5643	-0.910093	88.9075	-0.0699688
12.7043	143.932	11.5639	-0.909508	88.9045	-0.0699238
12.7127	144.011	11.5635	-0.908908	88.9015	-0.0698777
12.721	144.095	11.5632	-0.908324	88.8986	-0.0698328
12.7293	144.183	11.5628	-0.90773	88.8956	-0.0697871
12.7377	144.266	11.5624	-0.907174	88.8926	-0.0697444
12.746	144.348	11.562	-0.906602	88.8897	-0.0697004
12.7543	144.43	11.5616	-0.90603	88.8867	-0.0696564
12.7627	144.515	11.5612	-0.905419	88.8839	-0.0696095
12.771	144.599	11.5609	-0.904855	88.8809	-0.0695661
12.7793	144.685	11.5604	-0.904263	88.8778	-0.0695206
12.7877	144.769	11.5601	-0.903668	88.8749	-0.0694748
12.796	144.853	11.5597	-0.90309	88.8718	-0.0694304
12.8043	144.939	11.5593	-0.902526	88.869	-0.0693871
12.8127	145.025	11.5589	-0.901944	88.866	-0.0693423
12.821	145.105	11.5585	-0.901346	88.8628	-0.0692963
12.8293	145.188	11.5581	-0.900765	88.8597	-0.0692517
12.8377	145.272	11.5577	-0.900189	88.8567	-0.0692074
12.846	145.353	11.5573	-0.899609	88.8537	-0.0691627
12.8543	145.438	11.5569	-0.898994	88.8508	-0.0691155
12.8627	145.522	11.5566	-0.898406	88.8479	-0.0690703
12.871	145.61	11.5562	-0.897837	88.845	-0.0690265
12.8793	145.69	11.5558	-0.897246	88.8422	-0.0689811
12.8877	145.776	11.5554	-0.896644	88.8393	-0.0689348
12.896	145.861	11.5551	-0.896088	88.8364	-0.068892
12.9043	145.938	11.5547	-0.895546	88.8336	-0.0688504
12.9127	146.029	11.5544	-0.894967	88.831	-0.0688059
12.921	146.112	11.554	-0.894412	88.8281	-0.0687632
12.9293	146.199	11.5536	-0.893882	88.8254	-0.0687224
12.9377	146.28	11.5533	-0.893338	88.8226	-0.0686807
12.946	146.362	11.5529	-0.892811	88.8197	-0.0686401
12.9543	146.446	11.5525	-0.892262	88.8167	-0.0685979
12.9627	146.53	11.5521	-0.891758	88.8138	-0.0685592
12.971	146.617	11.5517	-0.891236	88.8108	-0.068519
12.9793	146.695	11.5513	-0.890715	88.8078	-0.068479
12.9877	146.783	11.551	-0.890169	88.8048	-0.068437
12.996	146.867	11.5505	-0.889648	88.8015	-0.068397
13.0043	146.952	11.5502	-0.88908	88.7987	-0.0683533
13.0127	147.035	11.5498	-0.888521	88.7956	-0.0683103
13.021	147.116	11.5494	-0.887965	88.7925	-0.0682676
13.0293	147.198	11.549	-0.88744	88.7895	-0.0682272
13.0377	147.285	11.5486	-0.88692	88.7864	-0.0681872
13.046	147.367	11.5482	-0.886348	88.7835	-0.0681433
13.0543	147.455	11.5478	-0.885782	88.7805	-0.0680997
13.0627	147.535	11.5474	-0.885212	88.7776	-0.0680559
13.071	147.619	11.547	-0.884645	88.7747	-0.0680123
13.0793	147.702	11.5467	-0.884093	88.7719	-0.0679698
13.0877	147.791	11.5463	-0.883547	88.769	-0.0679279
13.096	147.871	11.5459	-0.883024	88.7661	-0.0678877
13.1043	147.957	11.5456	-0.88251	88.7634	-0.0678481
13.1127	148.041	11.5452	-0.88195	88.7606	-0.0678051
13.121	148.124	11.5448	-0.881388	88.7577	-0.0677619
13.1293	148.206	11.5444	-0.880832	88.7547	-0.0677192
13.1377	148.289	11.5441	-0.880321	88.7519	-0.0676799
13.146	148.375	11.5437	-0.879791	88.749	-0.0676391
13.1543	148.457	11.5433	-0.87925	88.746	-0.0675976
13.1627	148.541	11.5429	-0.878713	88.7433	-0.0675563
13.171	148.625	11.5426	-0.878191	88.7404	-0.0675161
13.1793	148.716	11.5422	-0.87764	88.7375	-0.0674738
13.1877	148.798	11.5418	-0.877076	88.7346	-0.0674304
13.196	148.878	11.5414	-0.876517	88.7317	-0.0673874
13.2043	148.963	11.5411	-0.875987	88.729	-0.0673467
13.2127	149.044	11.5407	-0.875459	88.7263	-0.0673061
13.221	149.125	11.5404	-0.874914	88.7236	-0.0672642
13.2293	149.21	11.54	-0.874356	88.7208	-0.0672213
13.2377	149.295	11.5397	-0.873843	88.7183	-0.0671819
13.246	149.374	11.5394	-0.873325	88.7156	-0.0671421
13.2543	149.465	11.539	-0.872784	88.7127	-0.0671004
13.2627	149.545	11.5386	-0.872248	88.71	-0.0670592
13.271	149.63	11.5382	-0.871729	88.7071	-0.0670193
13.2793	149.714	11.5379	-0.871185	88.7043	-0.0669775
13.2877	149.8	11.5375	-0.870638	88.7014	-0.0669355
13.296	149.88	11.5371	-0.870135	88.6985	-0.0668968
13.3043	149.964	11.5368	-0.869601	88.6957	-0.0668557
13.3127	150.047	11.5364	-0.869102	88.6928	-0.0668173
13.321	150.131	11.536	-0.86859	88.6897	-0.066778
13.3293	150.215	11.5356	-0.868044	88.6869	-0.066736
13.3377	150.3	11.5353	-0.867513	88.6842	-0.0666952
13.346	150.387	11.5349	-0.866953	88.6815	-0.0666521
13.3543	150.47	11.5346	-0.866425	88.679	-0.0666115
13.3627	150.555	11.5342	-0.86594	88.6762	-0.0665743
13.371	150.639	11.5339	-0.865419	88.6735	-0.0665342
13.3793	150.722	11.5335	-0.864888	88.6708	-0.0664934
13.3877	150.802	11.5332	-0.864362	88.6681	-0.0664529
13.396	150.886	11.5328	-0.863798	88.6654	-0.0664096
13.4043	150.971	11.5325	-0.863201	88.6628	-0.0663636
13.4127	151.058	11.5321	-0.862651	88.6601	-0.0663214
13.421	151.137	11.5318	-0.862112	88.6574	-0.06628
13.4293	151.223	11.5314	-0.861599	88.6546	-0.0662405
13.4377	151.309	11.531	-0.861047	88.6515	-0.0661981
13.446	151.394	11.5307	-0.8605	88.6488	-0.066156
13.4543	151.476	11.5303	-0.859945	88.646	-0.0661133
13.4627	151.563	11.53	-0.859394	88.6434	-0.066071
13.471	151.641	11.5296	-0.858852	88.6408	-0.0660293
13.4793	151.73	11.5293	-0.858341	88.6383	-0.06599
13.4877	151.814	11.529	-0.857827	88.6357	-0.0659506
13.496	151.895	11.5286	-0.857297	88.6331	-0.0659098
13.5043	151.977	11.5283	-0.856753	88.6303	-0.0658679
13.5127	152.059	11.5279	-0.856217	88.6277	-0.0658267
13.521	152.146	11.5276	-0.855686	88.6253	-0.0657859
13.5293	152.23	11.5273	-0.855128	88.6228	-0.065743
13.5377	152.312	11.527	-0.854553	88.6203	-0.0656988
13.546	152.396	11.5266	-0.853999	88.6174	-0.0656562
13.5543	152.479	11.5262	-0.853447	88.6146	-0.0656138
13.5627	152.565	11.5259	-0.852904	88.6119	-0.065572
13.571	152.65	11.5255	-0.852375	88.6092	-0.0655314
13.5793	152.733	11.5252	-0.851863	88.6066	-0.065492
13.5877	152.816	11.5249	-0.851332	88.6042	-0.0654512
13.596	152.901	11.5245	-0.850786	88.6016	-0.0654092
13.6043	152.985	11.5242	-0.850245	88.5987	-0.0653676
13.6127	153.067	11.5238	-0.849701	88.5959	-0.0653258
13.621	153.156	11.5235	-0.849195	88.5933	-0.0652869
13.6293	153.237	11.5231	-0.848657	88.5909	-0.0652455
13.6377	153.325	11.5228	-0.848097	88.5886	-0.0652024
13.646	153.405	11.5225	-0.847516	88.586	-0.0651578
13.6543	153.489	11.5221	-0.846961	88.5833	-0.0651152
13.6627	153.57	11.5218	-0.846418	88.5806	-0.0650734
13.671	153.655	11.5214	-0.845888	88.578	-0.0650326
13.6793	153.74	11.5211	-0.845361	88.5753	-0.0649922
13.6877	153.822	11.5208	-0.844831	88.5728	-0.0649513
13.696	153.905	11.5205	-0.844285	88.5703	-0.0649094
13.7043	153.988	11.5201	-0.843738	88.5678	-0.0648674
13.7127	154.073	11.5198	-0.843227	88.5653	-0.0648281
13.721	154.161	11.5195	-0.842745	88.5627	-0.064791
13.7293	154.241	11.5191	-0.842276	88.5601	-0.064755
13.7377	154.327	11.5188	-0.841762	88.5576	-0.0647154
13.746	154.411	11.5185	-0.841205	88.5551	-0.0646726
13.7543	154.495	11.5182	-0.840664	88.5527	-0.064631
13.7627	154.579	11.5178	-0.840131	88.5503	-0.06459
13.771	154.665	11.5175	-0.8396	88.5479	-0.0645492
13.7793	154.747	11.5172	-0.839089	88.5454	-0.0645099
13.7877	154.83	11.5169	-0.838579	88.5428	-0.0644707
13.796	154.92	11.5165	-0.838038	88.5401	-0.0644291
13.8043	154.998	11.5162	-0.837488	88.5375	-0.0643869
13.8127	155.083	11.5158	-0.836918	88.5347	-0.064343
13.821	155.166	11.5155	-0.836395	88.5322	-0.0643028
13.8293	155.251	11.5152	-0.835869	88.5296	-0.0642624
13.8377	155.334	11.5148	-0.835343	88.527	-0.0642219
13.846	155.417	11.5145	-0.834838	88.5245	-0.0641831
13.8543	155.497	11.5142	-0.834332	88.522	-0.0641442
13.8627	155.583	11.5138	-0.833807	88.5194	-0.0641038
13.871	155.668	11.5135	-0.833275	88.5168	-0.0640629
13.8793	155.749	11.5132	-0.832757	88.5145	-0.0640231
13.8877	155.839	11.5129	-0.832233	88.5122	-0.0639828
13.896	155.922	11.5126	-0.831729	88.51	-0.0639441
13.9043	156.009	11.5123	-0.831195	88.5075	-0.063903
13.9127	156.091	11.512	-0.830692	88.505	-0.0638644
13.921	156.175	11.5116	-0.830169	88.5025	-0.0638242
13.9293	156.256	11.5113	-0.829632	88.4999	-0.0637829
13.9377	156.341	11.511	-0.829075	88.4975	-0.06374
13.946	156.422	11.5107	-0.828552	88.495	-0.0636999
13.9543	156.502	11.5104	-0.828021	88.4926	-0.063659
13.9627	156.592	11.51	-0.827472	88.4903	-0.0636168
13.971	156.677	11.5097	-0.826957	88.4878	-0.0635772
13.9793	156.758	11.5094	-0.826431	88.4852	-0.0635367
13.9877	156.845	11.509	-0.825932	88.4825	-0.0634984
13.996	156.926	11.5087	-0.825442	88.4802	-0.0634608
14.0043	157.01	11.5084	-0.824951	88.4778	-0.063423
14.0127	157.095	11.5081	-0.824444	88.4754	-0.063384
14.021	157.183	11.5078	-0.823945	88.4729	-0.0633456
14.0293	157.262	11.5075	-0.823435	88.4704	-0.0633064
14.0377	157.351	11.5071	-0.822954	88.468	-0.0632695
14.046	157.432	11.5068	-0.822467	88.4653	-0.063232
14.0543	157.519	11.5065	-0.821955	88.463	-0.0631927
14.0627	157.6	11.5062	-0.821461	88.4606	-0.0631546
14.071	157.682	11.5059	-0.820953	88.4584	-0.0631156
14.0793	157.766	11.5056	-0.820436	88.4561	-0.0630759
14.0877	157.851	11.5053	-0.819924	88.4536	-0.0630365
14.096	157.936	11.505	-0.819442	88.4512	-0.0629995
14.1043	158.018	11.5047	-0.818981	88.449	-0.062964
14.1127	158.103	11.5044	-0.818506	88.4467	-0.0629275
14.121	158.189	11.5041	-0.818008	88.4443	-0.0628892
14.1293	158.272	11.5037	-0.817519	88.4418	-0.0628516
14.1377	158.357	11.5034	-0.817057	88.4393	-0.0628161
14.146	158.438	11.5031	-0.816547	88.437	-0.0627769
14.1543	158.528	11.5028	-0.816021	88.4343	-0.0627364
14.1627	158.607	11.5024	-0.815477	88.4318	-0.0626946
14.171	158.696	11.5021	-0.814972	88.4294	-0.0626558
14.1793	158.781	11.5018	-0.814442	88.427	-0.062615
14.1877	158.862	11.5015	-0.813915	88.4244	-0.0625745
14.196	158.939	11.5012	-0.813407	88.4219	-0.0625355
14.2043	159.026	11.5008	-0.812905	88.4194	-0.0624969
14.2127	159.107	11.5005	-0.812403	88.4172	-0.0624583
14.221	159.194	11.5003	-0.811896	88.415	-0.0624193
14.2293	159.278	11.5	-0.811397	88.4129	-0.062381
14.2377	159.361	11.4997	-0.810927	88.4107	-0.0623448
14.246	159.449	11.4994	-0.810472	88.4084	-0.0623098
14.2543	159.532	11.4991	-0.810005	88.4061	-0.0622739
14.2627	159.617	11.4988	-0.809535	88.4037	-0.0622378
14.271	159.694	11.4985	-0.809068	88.4015	-0.0622019
14.2793	159.783	11.4982	-0.808593	88.3993	-0.0621654
14.2877	159.871	11.4979	-0.808122	88.3971	-0.0621292
14.296	159.954	11.4976	-0.80765	88.3947	-0.0620929
14.3043	160.037	11.4973	-0.807184	88.3921	-0.0620571
14.3127	160.119	11.497	-0.806721	88.3897	-0.0620215
14.321	160.206	11.4967	-0.806245	88.3874	-0.0619848
14.3293	160.288	11.4964	-0.805785	88.3852	-0.0619495
14.3377	160.372	11.4961	-0.805305	88.383	-0.0619126
14.346	160.456	11.4958	-0.804827	88.3808	-0.0618758
14.3543	160.538	11.4955	-0.804349	88.3785	-0.0618391
14.3627	160.623	11.4952	-0.80387	88.3763	-0.0618022
14.371	160.709	11.4949	-0.803413	88.3741	-0.0617671
14.3793	160.793	11.4947	-0.802965	88.3721	-0.0617327
14.3877	160.876	11.4944	-0.802481	88.3698	-0.0616955
14.396	160.958	11.4941	-0.802019	88.3676	-0.0616599
14.4043	161.043	11.4938	-0.801561	88.3652	-0.0616248
14.4127	161.128	11.4935	-0.801086	88.363	-0.0615882
14.421	161.211	11.4932	-0.800649	88.3606	-0.0615547
14.4293	161.299	11.4929	-0.800193	88.3582	-0.0615195
14.4377	161.387	11.4926	-0.79974	88.356	-0.0614847
14.446	161.466	11.4923	-0.799298	88.3535	-0.0614508
14.4543	161.549	11.4919	-0.798823	88.3512	-0.0614142
14.4627	161.637	11.4916	-0.798343	88.3487	-0.0613773
14.471	161.72	11.4913	-0.797863	88.3464	-0.0613404
14.4793	161.805	11.491	-0.797429	88.3437	-0.0613071
14.4877	161.886	11.4907	-0.796998	88.3413	-0.061274
14.496	161.97	11.4904	-0.796559	88.339	-0.0612402
14.5043	162.058	11.4901	-0.796093	88.3368	-0.0612044
14.5127	162.139	11.4898	-0.795665	88.3345	-0.0611714
14.521	162.221	11.4895	-0.795221	88.3322	-0.0611373
14.5293	162.307	11.4892	-0.794736	88.3299	-0.0611
14.5377	162.387	11.4889	-0.794278	88.3275	-0.0610648
14.546	162.474	11.4886	-0.793834	88.3251	-0.0610307
14.5543	162.557	11.4883	-0.793411	88.3229	-0.0609981
14.5627	162.641	11.488	-0.792956	88.3209	-0.0609632
14.571	162.724	11.4877	-0.79249	88.3188	-0.0609274
14.5793	162.808	11.4875	-0.792035	88.3166	-0.0608923
14.5877	162.89	11.4872	-0.791574	88.3146	-0.0608569
14.596	162.972	11.4869	-0.791112	88.3124	-0.0608214
14.6043	163.059	11.4866	-0.790659	88.3101	-0.0607866
14.6127	163.143	11.4863	-0.79024	88.3079	-0.0607544
14.621	163.222	11.486	-0.789795	88.3056	-0.0607202
14.6293	163.307	11.4857	-0.789328	88.3034	-0.0606842
14.6377	163.391	11.4855	-0.788887	88.3013	-0.0606503
14.646	163.478	11.4852	-0.788433	88.299	-0.0606155
14.6543	163.562	11.4849	-0.787995	88.2967	-0.0605818
14.6627	163.641	11.4845	-0.787552	88.2942	-0.0605477
14.671	163.728	11.4842	-0.787114	88.2918	-0.0605141
14.6793	163.812	11.4839	-0.786691	88.2895	-0.0604815
14.6877	163.896	11.4837	-0.786277	88.2873	-0.0604497
14.696	163.982	11.4834	-0.785846	88.2853	-0.0604166
14.7043	164.065	11.4831	-0.785438	88.2833	-0.0603852
14.7127	164.148	11.4828	-0.785055	88.2812	-0.0603557
14.721	164.233	11.4826	-0.784638	88.2793	-0.0603237
14.7293	164.317	11.4823	-0.784215	88.2771	-0.0602912
14.7377	164.405	11.4821	-0.783816	88.2751	-0.0602605
14.746	164.484	11.4818	-0.783422	88.2731	-0.0602302
14.7543	164.566	11.4816	-0.783027	88.2713	-0.0601998
14.7627	164.647	11.4813	-0.782624	88.2694	-0.0601688
14.771	164.733	11.4811	-0.782197	88.2674	-0.060136
14.7793	164.817	11.4808	-0.781793	88.2654	-0.060105
14.7877	164.901	11.4805	-0.781359	88.2634	-0.0600716
14.796	164.987	11.4803	-0.780917	88.2613	-0.0600376
14.8043	165.073	11.48	-0.780489	88.2591	-0.0600047
14.8127	165.156	11.4797	-0.780056	88.257	-0.0599714
14.821	165.238	11.4794	-0.779602	88.2548	-0.0599365
14.8293	165.324	11.4791	-0.77914	88.2527	-0.059901
14.8377	165.403	11.4788	-0.778713	88.2503	-0.0598682
14.846	165.492	11.4785	-0.778277	88.2481	-0.0598347
14.8543	165.57	11.4783	-0.777864	88.2459	-0.0598029
14.8627	165.656	11.478	-0.777444	88.2437	-0.0597706
14.871	165.739	11.4777	-0.77705	88.2415	-0.0597403
14.8793	165.821	11.4774	-0.776651	88.2394	-0.0597096
14.8877	165.907	11.4771	-0.776228	88.2371	-0.0596771
14.896	165.991	11.4769	-0.775825	88.2351	-0.0596462
14.9043	166.076	11.4766	-0.775416	88.233	-0.0596147
14.9127	166.159	11.4763	-0.775007	88.2308	-0.0595833
14.921	166.241	11.476	-0.77456	88.2288	-0.0595489
14.9293	166.326	11.4757	-0.774123	88.2266	-0.0595153
14.9377	166.411	11.4755	-0.773696	88.2244	-0.0594825
14.946	166.492	11.4752	-0.77327	88.2222	-0.0594497
14.9543	166.581	11.4749	-0.772864	88.2199	-0.0594185
14.9627	166.665	11.4746	-0.77245	88.2178	-0.0593867
14.971	166.745	11.4743	-0.772078	88.2157	-0.059358
14.9793	166.833	11.474	-0.771703	88.2135	-0.0593293
14.9877	166.919	11.4737	-0.771317	88.2112	-0.0592995
14.996	167.001	11.4735	-0.77094	88.209	-0.0592706
15.0043	167.085	11.4732	-0.770556	88.207	-0.0592411
15.0127	167.165	11.4729	-0.77018	88.2049	-0.0592121
15.021	167.251	11.4727	-0.769774	88.2029	-0.0591809
15.0293	167.334	11.4724	-0.769362	88.2005	-0.0591492
15.0377	167.415	11.4721	-0.768935	88.1984	-0.0591164
15.046	167.497	11.4718	-0.768559	88.1964	-0.0590875
15.0543	167.585	11.4715	-0.768136	88.1942	-0.059055
15.0627	167.666	11.4713	-0.767727	88.1921	-0.0590236
15.071	167.749	11.471	-0.767308	88.1902	-0.0589914
15.0793	167.831	11.4707	-0.766885	88.188	-0.0589588
15.0877	167.918	11.4704	-0.766464	88.1858	-0.0589265
15.096	168.005	11.4702	-0.766067	88.1837	-0.0588959
15.1043	168.087	11.4699	-0.765677	88.1816	-0.0588659
15.1127	168.167	11.4696	-0.765294	88.1797	-0.0588365
15.121	168.256	11.4694	-0.76493	88.1776	-0.0588085
15.1293	168.338	11.4691	-0.764507	88.1754	-0.058776
15.1377	168.423	11.4688	-0.764079	88.1731	-0.0587431
15.146	168.51	11.4685	-0.763667	88.1712	-0.0587114
15.1543	168.592	11.4683	-0.763286	88.169	-0.0586821
15.1627	168.672	11.468	-0.762916	88.1669	-0.0586537
15.171	168.76	11.4677	-0.762566	88.1647	-0.0586268
15.1793	168.843	11.4674	-0.762174	88.1626	-0.0585966
15.1877	168.929	11.4672	-0.761751	88.1606	-0.0585641
15.196	169.009	11.4669	-0.761354	88.1583	-0.0585336
15.2043	169.094	11.4666	-0.760949	88.1566	-0.0585025
15.2127	169.178	11.4664	-0.760552	88.1546	-0.0584719
15.221	169.262	11.4661	-0.760177	88.1527	-0.0584431
15.2293	169.345	11.4658	-0.759794	88.1505	-0.0584137
15.2377	169.425	11.4656	-0.759418	88.1485	-0.0583848
15.246	169.507	11.4653	-0.759022	88.1465	-0.0583543
15.2543	169.596	11.4651	-0.758599	88.1446	-0.0583218
15.2627	169.679	11.4648	-0.758191	88.1424	-0.0582904
15.271	169.762	11.4645	-0.757825	88.1405	-0.0582623
15.2793	169.845	11.4643	-0.757441	88.1384	-0.0582328
15.2877	169.928	11.464	-0.75705	88.1362	-0.0582027
15.296	170.014	11.4637	-0.756667	88.1344	-0.0581732
15.3043	170.092	11.4635	-0.756277	88.1324	-0.0581432
15.3127	170.18	11.4633	-0.755871	88.1306	-0.0581121
15.321	170.262	11.463	-0.755452	88.1286	-0.0580798
15.3293	170.349	11.4627	-0.755058	88.1266	-0.0580495
15.3377	170.429	11.4625	-0.754698	88.1246	-0.0580219
15.346	170.516	11.4622	-0.754311	88.1227	-0.0579921
15.3543	170.597	11.4619	-0.75396	88.1204	-0.0579651
15.3627	170.683	11.4617	-0.753578	88.1185	-0.0579358
15.371	170.766	11.4614	-0.753201	88.1164	-0.0579068
15.3793	170.848	11.4611	-0.752817	88.1142	-0.0578773
15.3877	170.937	11.4609	-0.752443	88.1123	-0.0578485
15.396	171.017	11.4606	-0.752084	88.1102	-0.0578209
15.4043	171.108	11.4604	-0.751712	88.1084	-0.0577923
15.4127	171.184	11.4601	-0.751337	88.1065	-0.0577635
15.421	171.277	11.4599	-0.750952	88.1044	-0.0577339
15.4293	171.358	11.4596	-0.750595	88.1023	-0.0577064
15.4377	171.436	11.4593	-0.750193	88.1004	-0.0576755
15.446	171.524	11.4591	-0.749813	88.0985	-0.0576463
15.4543	171.609	11.4588	-0.749456	88.0967	-0.0576189
15.4627	171.689	11.4586	-0.749094	88.0946	-0.0575911
15.471	171.78	11.4583	-0.748731	88.0927	-0.0575631
15.4793	171.861	11.4581	-0.748356	88.0905	-0.0575343
15.4877	171.943	11.4578	-0.747981	88.0882	-0.0575055
15.496	172.03	11.4575	-0.747618	88.086	-0.0574776
15.5043	172.105	11.4572	-0.747259	88.084	-0.05745
15.5127	172.191	11.457	-0.746907	88.0822	-0.0574229
15.521	172.275	11.4567	-0.746541	88.0802	-0.0573948
15.5293	172.361	11.4565	-0.746176	88.0782	-0.0573667
15.5377	172.445	11.4562	-0.745783	88.0763	-0.0573365
15.546	172.531	11.4559	-0.745411	88.0743	-0.0573079
15.5543	172.612	11.4557	-0.745036	88.0721	-0.057279
15.5627	172.697	11.4554	-0.744662	88.07	-0.0572503
15.571	172.781	11.4552	-0.744302	88.0684	-0.0572226
15.5793	172.864	11.455	-0.743921	88.0668	-0.0571933
15.5877	172.947	11.4547	-0.743552	88.0651	-0.057165
15.596	173.031	11.4545	-0.743193	88.0632	-0.0571374
15.6043	173.11	11.4543	-0.742827	88.0616	-0.0571092
15.6127	173.197	11.4541	-0.742461	88.0599	-0.0570811
15.621	173.278	11.4538	-0.742096	88.0581	-0.057053
15.6293	173.369	11.4536	-0.741734	88.0562	-0.0570252
15.6377	173.451	11.4534	-0.741392	88.0545	-0.0569989
15.646	173.53	11.4531	-0.741038	88.0528	-0.0569716
15.6543	173.618	11.4529	-0.740695	88.0509	-0.0569453
15.6627	173.7	11.4526	-0.740341	88.0487	-0.0569181
15.671	173.781	11.4523	-0.739984	88.0465	-0.0568906
15.6793	173.865	11.4521	-0.739599	88.0445	-0.0568611
15.6877	173.948	11.4518	-0.739222	88.0424	-0.056832
15.696	174.038	11.4515	-0.73887	88.0405	-0.056805
15.7043	174.122	11.4513	-0.73854	88.0386	-0.0567796
15.7127	174.2	11.4511	-0.738207	88.0368	-0.056754
15.721	174.284	11.4508	-0.737841	88.0349	-0.0567259
15.7293	174.372	11.4506	-0.737478	88.033	-0.056698
15.7377	174.453	11.4503	-0.737106	88.0309	-0.0566694
15.746	174.541	11.4501	-0.736768	88.0292	-0.0566434
15.7543	174.624	11.4499	-0.736413	88.0276	-0.0566161
15.7627	174.71	11.4496	-0.736089	88.0258	-0.0565912
15.771	174.795	11.4494	-0.735771	88.024	-0.0565667
15.7793	174.873	11.4491	-0.735429	88.022	-0.0565405
15.7877	174.958	11.4489	-0.735058	88.02	-0.0565119
15.796	175.041	11.4486	-0.734701	88.018	-0.0564845
15.8043	175.123	11.4484	-0.734364	88.0162	-0.0564586
15.8127	175.208	11.4482	-0.734041	88.0145	-0.0564337
15.821	175.291	11.4479	-0.733713	88.0127	-0.0564086
15.8293	175.377	11.4477	-0.733335	88.0107	-0.0563795
15.8377	175.464	11.4474	-0.732967	88.0085	-0.0563512
15.846	175.544	11.4471	-0.732601	88.0063	-0.0563231
15.8543	175.625	11.4468	-0.73225	88.0041	-0.056296
15.8627	175.711	11.4466	-0.731896	88.0022	-0.0562688
15.871	175.794	11.4463	-0.731565	88.0002	-0.0562434
15.8793	175.882	11.446	-0.731191	87.9983	-0.0562147
15.8877	175.962	11.4458	-0.730834	87.9962	-0.0561872
15.896	176.049	11.4455	-0.73046	87.994	-0.0561584
15.9043	176.132	11.4452	-0.730109	87.9921	-0.0561315
15.9127	176.212	11.445	-0.729792	87.9902	-0.0561071
15.921	176.294	11.4448	-0.72948	87.9884	-0.0560831
15.9293	176.376	11.4445	-0.729141	87.9865	-0.056057
15.9377	176.465	11.4443	-0.728804	87.9847	-0.0560311
15.946	176.546	11.444	-0.728468	87.9828	-0.0560053
15.9543	176.633	11.4438	-0.728114	87.9811	-0.0559781
15.9627	176.721	11.4436	-0.727765	87.9794	-0.0559512
15.971	176.8	11.4434	-0.727433	87.9777	-0.0559257
15.9793	176.882	11.4432	-0.727123	87.9761	-0.0559019
15.9877	176.969	11.4429	-0.726765	87.9742	-0.0558743
15.996	177.052	11.4427	-0.726418	87.9725	-0.0558477
16.0043	177.136	11.4425	-0.726068	87.9707	-0.0558208
16.0127	177.221	11.4422	-0.725726	87.9688	-0.0557944
16.021	177.303	11.442	-0.725386	87.9668	-0.0557683
16.0293	177.381	11.4417	-0.725042	87.9648	-0.0557419
16.0377	177.467	11.4414	-0.724699	87.9627	-0.0557155
16.046	177.552	11.4411	-0.724408	87.9604	-0.0556932
16.0543	177.637	11.4409	-0.724107	87.9586	-0.05567
16.0627	177.718	11.4406	-0.723757	87.9566	-0.0556431
16.071	177.8	11.4404	-0.723427	87.9547	-0.0556177
16.0793	177.885	11.4401	-0.723094	87.9527	-0.0555921
16.0877	177.97	11.4399	-0.722746	87.9508	-0.0555653
16.096	178.051	11.4397	-0.722389	87.9491	-0.0555379
16.1043	178.135	11.4394	-0.722056	87.9474	-0.0555123
16.1127	178.22	11.4392	-0.721733	87.9457	-0.0554875
16.121	178.306	11.439	-0.721398	87.9442	-0.0554618
16.1293	178.391	11.4388	-0.721035	87.9424	-0.0554338
16.1377	178.473	11.4385	-0.720672	87.9405	-0.0554059
16.146	178.553	11.4383	-0.720339	87.9388	-0.0553803
16.1543	178.638	11.4381	-0.719992	87.9372	-0.0553536
16.1627	178.721	11.4379	-0.71962	87.9355	-0.055325
16.171	178.808	11.4376	-0.719271	87.9337	-0.0552982
16.1793	178.893	11.4374	-0.718959	87.9318	-0.0552742
16.1877	178.976	11.4372	-0.718615	87.9302	-0.0552477
16.196	179.062	11.4369	-0.718286	87.9283	-0.0552225
16.2043	179.143	11.4367	-0.717958	87.9262	-0.0551973
16.2127	179.224	11.4365	-0.717641	87.9245	-0.0551729
16.221	179.312	11.4362	-0.717297	87.9227	-0.0551464
16.2293	179.393	11.436	-0.716966	87.9208	-0.055121
16.2377	179.479	11.4357	-0.716646	87.9189	-0.0550964
16.246	179.563	11.4355	-0.716363	87.9169	-0.0550747
16.2543	179.645	11.4352	-0.71608	87.9152	-0.0550529
16.2627	179.729	11.435	-0.715781	87.9132	-0.0550299
16.271	179.814	11.4347	-0.715458	87.9113	-0.0550051
16.2793	179.897	11.4345	-0.71512	87.9096	-0.0549791
16.2877	179.979	11.4343	-0.714826	87.908	-0.0549565
16.296	180.067	11.4341	-0.714511	87.9062	-0.0549323
16.3043	180.149	11.4338	-0.714187	87.9043	-0.0549073
16.3127	180.233	11.4336	-0.713873	87.9024	-0.0548832
16.321	180.317	11.4334	-0.713558	87.9007	-0.054859
16.3293	180.395	11.4331	-0.713213	87.8989	-0.0548325
16.3377	180.482	11.4329	-0.712857	87.8973	-0.0548051
16.346	180.565	11.4327	-0.712515	87.8956	-0.0547788
16.3543	180.65	11.4325	-0.712193	87.8939	-0.0547541
16.3627	180.739	11.4322	-0.711878	87.8921	-0.0547298
16.371	180.818	11.432	-0.711587	87.8902	-0.0547074
16.3793	180.9	11.4317	-0.711305	87.8883	-0.0546858
16.3877	180.987	11.4315	-0.711027	87.8864	-0.0546644
16.396	181.066	11.4313	-0.710732	87.8848	-0.0546417
16.4043	181.149	11.4311	-0.710441	87.883	-0.0546194
16.4127	181.233	11.4308	-0.710164	87.8813	-0.054598
16.421	181.315	11.4306	-0.709871	87.8795	-0.0545755
16.4293	181.399	11.4304	-0.709545	87.8777	-0.0545505
16.4377	181.484	11.4301	-0.709266	87.8757	-0.054529
16.446	181.566	11.4299	-0.708991	87.874	-0.0545079
16.4543	181.654	11.4297	-0.708653	87.8723	-0.0544819
16.4627	181.736	11.4295	-0.708299	87.8707	-0.0544547
16.471	181.819	11.4293	-0.70799	87.8693	-0.0544309
16.4793	181.904	11.4291	-0.707679	87.8677	-0.054407
16.4877	181.987	11.4288	-0.707384	87.8659	-0.0543843
16.496	182.066	11.4286	-0.707043	87.8641	-0.0543581
16.5043	182.154	11.4284	-0.706726	87.8623	-0.0543338
16.5127	182.235	11.4281	-0.706422	87.8606	-0.0543104
16.521	182.319	11.4279	-0.706106	87.859	-0.0542861
16.5293	182.402	11.4277	-0.705786	87.8572	-0.0542615
16.5377	182.488	11.4275	-0.705498	87.8556	-0.0542394
16.546	182.57	11.4273	-0.70522	87.8537	-0.054218
16.5543	182.656	11.427	-0.704925	87.8519	-0.0541953
16.5627	182.736	11.4268	-0.704625	87.85	-0.0541722
16.571	182.82	11.4266	-0.704316	87.8484	-0.0541484
16.5793	182.905	11.4263	-0.704051	87.8468	-0.0541281
16.5877	182.988	11.4261	-0.703787	87.8452	-0.0541078
16.596	183.07	11.4259	-0.70351	87.8435	-0.0540865
16.6043	183.156	11.4257	-0.703194	87.8418	-0.0540622
16.6127	183.239	11.4255	-0.70288	87.8401	-0.0540381
16.621	183.32	11.4252	-0.70257	87.8383	-0.0540142
16.6293	183.409	11.425	-0.702246	87.8366	-0.0539893
16.6377	183.491	11.4248	-0.701925	87.8351	-0.0539646
16.646	183.575	11.4246	-0.701609	87.8334	-0.0539404
[truncated: 9,856 more rows]
