# Supplementary material for: Comparative study on mechanisms for improving mechanical properties and microstructure of cement paste modified by different types of nanomaterials
Source: publisher site journal article supplement (doi:10.1515/ntrev-2021-0027), 2021-01-01
Supplement: Supplementary file 19 [file XRD1d.xlsx]

## Sheet: Sheet1
	N-0-1d	NC-0.15	NC-0.3	NC-0.45	NC-0.6	NG-0.01	NG-0.02	NG-0.03	NG-0.04	NS1-1.5	NS1-3	NS1-4.5	NS1-6	NT-2
CH	5.9	15.2	15.3	12.2	16.4	10.1	11.5	16.7	14.7	17.1	19.2	15.1	10.2	11.2
CS	65.9	45.3	37.5	37	50.2	50.3	44.1	32.2	30	39.9	42.7	31	55.7	59.9
CC	1.8	4.724	9.6	9.2	4.8	1.8	1.7	3	2.7	3	7.6	13.4
E	8.1	10.7	11.2	22.1	11.3	18.3	21.8	26.1	34.4	23.8	11.9	24.7	14.4	5.4
CH*	7.232	18.6958	22.404	19.008	19.952	11.432	12.758	18.92	16.698	19.32	24.824	25.016	10.2	15.196
	81.7	75.924	73.6	80.5	82.7	80.5	79.1	78	81.8	83.8	81.4	84.2	80.3	76.5
SUM	81.232	74.6958	71.104	78.108	81.452	80.032	78.658	77.22	81.098	83.02	79.424	80.716	80.3	#REF!
	N-0-1d	NC-0.15	NC-0.3	NC-0.45	NC-0.6	NG-0.01	NG-0.02	NG-0.03	NG-0.04	NS1-1.5	NS1-3	NS1-4.5	NS1-6	NT-2
CH	7.232	18.6958	22.404	19.008	19.952	11.432	12.758	18.92	16.698	19.32	24.824	25.016	24.2	15.196
CS	65.9	45.3	37.5	37	50.2	50.3	44.1	32.2	30	39.9	42.7	31	32.7	59.9
E	8.1	10.7	11.2	22.1	11.3	18.3	21.8	26.1	34.4	23.8	11.9	24.7	24.4	5.4
OP	18.768	25.3042	28.896	21.892	18.548	19.968	21.342	22.78	18.902	16.98	20.576	19.284	19.7	19.504
