# Supplementary material for: Comparative study on mechanisms for improving mechanical properties and microstructure of cement paste modified by different types of nanomaterials
Source: publisher site journal article supplement (doi:10.1515/ntrev-2021-0027), 2021-01-01
Supplement: Supplementary file 20 [file XRD28d.xlsx]

## Sheet: Sheet1
	CH	C3S&C2S	CC	Aft&Afm			SUM	UN
N-0	38	52.6		5.9			96.5	--
NC-0.3	31.7	59		5.2			95.9	--
NG-0.03	40.5	43.4		13			96.9	--
NS-6	32.5	53.9		18			104.4	--
NT-2	39.2	54.8		4.9			98.9	--
	CH	C3S&C2S	CC	Aft&Afm	CH*		SUM
N-0	33.8	38.4	1.8	7.9	35.132		81.432
NC-0.3	20	39.6	10.5	10.9	27.77		78.27
NG-0.03	31.7	35.9	6.1	13	36.214		85.114
NS-6	24.7	40.6	4.5	18.1	28.03		86.73
NT-2	33.4	43.8	7.9	5.9	39.246		88.946
	C3S&C2S	Aft&Afm	CH*	OP		SUM
N-0	38.4	7.9	35.132	18.568		81.432
NC-0.3	39.6	10.9	27.77	21.73		78.27
NG-0.03	35.9	13	36.214	14.886		85.114
NS-6	40.6	18.1	28.03	13.27		86.73
NT-2	43.8	5.9	39.246	11.054		88.946
